# Supplementary material for: PlantNLRatlas: a comprehensive dataset of full- and partial-length NLR resistance genes across 100 chromosome-level plant genomes
Source: Front Plant Sci. 2023 Apr 14;14:1178069. doi: 10.3389/fpls.2023.1178069 (PMC10146310; doi:10.3389/fpls.2023.1178069)
Supplement: Supplementary Table 1 — Metadata of the 100 plants used in this study. [file Table_1.xlsx]

## Sheet: Sheet1
ID	Order	Family	Genus	Species	Latin	English	Chinese	Level	NLRs	ID.type	Paper.link	Download.link
PlantKGA_3	Ericales	Actinidiaceae	Actinidia	chinensis	Actinidia chinensis	kiwifruit	猕猴桃	chromosome	Yes	转录本	https://academic.oup.com/hr/article/doi/10.1038/s41438-019-0202-y/6437892?login=false	http://kiwifruitgenome.org/ftp/A_chinensis/Hongyang/v3.0/
PlantKGA_4	Ericales	Actinidiaceae	Actinidia	eriantha	Actinidia eriantha	velvet kiwifruit	毛花猕猴桃	chromosome	Yes	基因=转录本	https://academic.oup.com/gigascience/article/8/4/giz027/5426569?login=false	http://gigadb.org/dataset/100568
PlantKGA_5	Asparagales	Amaryllidaceae	Allium	sativum	Allium sativum	garlic	大蒜	chromosome	Yes	转录本	https://www.cell.com/molecular-plant/fulltext/S1674-2052(20)30232-X?_returnURL=https%3A%2F%2Flinkinghub.elsevier.com%2Fretrieve%2Fpii%2FS167420522030232X%3Fshowall%3Dtrue#secsectitle0135	https://figshare.com/articles/dataset/garlic_genome_and_transcriptome_resources/12570947/1
PlantKGA_6	Poales	Bromeliaceae	Ananas	comosus	Ananas comosus	pineapple	凤梨、菠萝	chromosome	Yes	转录本	https://www.nature.com/articles/ng.3435	http://de.iplantcollaborative.org/dl/d/D7FE2945-794C-4D59-8FDF-FCBB1E1F3969/pineapple.zip
PlantKGA_7	Apiales	Apiaceae	Apium	graveolens	Apium graveolens	celery	芹菜	chromosome	Yes	转录本	https://onlinelibrary.wiley.com/doi/10.1111/pbi.13499	http://celerydb.bio2db.com/download.html
PlantKGA_8	Malvales	Thymelaeaceae	Aquilaria	sinensis	Aquilaria sinensis	aquilaria sinensis	土沉香	chromosome	Yes	转录本	https://academic.oup.com/gigascience/article/9/3/giaa013/5771296?login=false	http://gigadb.org/dataset/100702
PlantKGA_9	Fabales	Fabaceae	Arachis	hypogaea	Arachis hypogaea	peanut	落花生	chromosome	Yes	转录本	https://www.nature.com/articles/s41588-019-0402-2	http://peanutgr.fafu.edu.cn/Download.php
PlantKGA_12	Sapindales	Rutaceae	Atalantia	buxifolia	Atalantia buxifolia	Chinese box-orange	酒饼簕	chromosome	Yes	转录本	https://www.nature.com/articles/ng.3839	http://citrus.hzau.edu.cn/download.php
PlantKGA_13	Oxalidales	Oxalidaceae	Averrhoa	carambola	Averrhoa carambola	star fruit	杨桃	chromosome	Yes	基因=转录本	https://academic.oup.com/hr/article/doi/10.1038/s41438-020-0307-3/6445436?login=false	https://ngdc.cncb.ac.cn/search/?dbId=gwh&q=GWHABKE00000000
PlantKGA_14	Caryophyllales	Amaranthaceae	Beta	vulgaris	Beta vulgaris	sugar beet	甜菜	chromosome	Yes	转录本	https://www.nature.com/articles/nature12817	https://www.ncbi.nlm.nih.gov/genome/221?genome_assembly_id=294401
PlantKGA_15	Brassicales	Brassicaceae	Brassica	juncea	Brassica juncea	Chinese mustard	芥菜	chromosome	Yes	转录本	https://www.nature.com/articles/ng.3657	http://39.100.233.196:82/download_genome/Brassica_Genome_data/Braju_tum_V2.0/
PlantKGA_16	Brassicales	Brassicaceae	Brassica	nigra	Brassica nigra	black mustard	黑芥	chromosome	Yes	转录本	https://www.nature.com/articles/s41477-020-0735-y	http://brassicadb.cn/#/Download/
PlantKGA_17	Brassicales	Brassicaceae	Brassica	oleracea	Brassica oleracea var. botrytis	cabbage	花椰菜	chromosome	Yes	基因=转录本	https://www.nature.com/articles/s41477-018-0289-4	https://www.genoscope.cns.fr/externe/plants/chromosomes.html
PlantKGA_18	Brassicales	Brassicaceae	Brassica	oleracea	Brassica oleracea var. capitata	cabbage	甘蓝	chromosome	Yes	转录本	https://link.springer.com/article/10.1007/s00122-020-03664-3	http://brassicadb.cn/#/Download/
PlantKGA_19	Ericales	Theaceae	Camellia	sinensis	Camellia sinensis	tea	茶	chromosome	Yes	转录本	https://www.cell.com/molecular-plant/fulltext/S1674-2052(20)30134-9?_returnURL=https%3A%2F%2Flinkinghub.elsevier.com%2Fretrieve%2Fpii%2FS1674205220301349%3Fshowall%3Dtrue	http://tpdb.shengxin.ren/
PlantKGA_21	Rosales	Cannabaceae	Cannabis	sativa	Cannabis sativa	marijuana	大麻	chromosome	Yes	转录本	https://academic.oup.com/hr/article/doi/10.1038/s41438-020-0295-3/6445457?login=true	https://www.ncbi.nlm.nih.gov/genome/11681?genome_assembly_id=897706
PlantKGA_22	Solanales	Solanaceae	Capsicum	annuum	Capsicum annuum	hot pepper	辣椒	chromosome	Yes	转录本	https://www.pnas.org/doi/full/10.1073/pnas.1400975111	https://www.ncbi.nlm.nih.gov/genome/10896?genome_assembly_id=227510
PlantKGA_23	Brassicales	Caricaceae	Carica	papaya	Carica papaya	papaya	番木瓜	chromosome	Yes	转录本	https://www.nature.com/articles/nature06856	https://www.ncbi.nlm.nih.gov/genome/513?genome_assembly_id=29701
PlantKGA_25	Sapindales	Rutaceae	Citrus	grandis	Citrus grandis	pummelo	柚	chromosome	Yes	转录本	https://www.nature.com/articles/ng.3839	http://citrus.hzau.edu.cn/download.php
PlantKGA_26	Sapindales	Rutaceae	Citrus	medica	Citrus medica	citron	香橼、枸橼	chromosome	Yes	转录本	https://www.nature.com/articles/ng.3839	http://citrus.hzau.edu.cn/download.php
PlantKGA_27	Sapindales	Rutaceae	Citrus	reticulata	Citrus reticulata	mandarin	柑橘	chromosome	Yes	转录本	https://www.cell.com/molecular-plant/fulltext/S1674-2052(18)30187-4?_returnURL=https%3A%2F%2Flinkinghub.elsevier.com%2Fretrieve%2Fpii%2FS1674205218301874%3Fshowall%3Dtrue	http://citrus.hzau.edu.cn/download.php
PlantKGA_28	Sapindales	Rutaceae	Citrus	sinensis	Citrus sinensis	sweet orange	甜橙	chromosome	Yes	转录本	https://www.nature.com/articles/ng.2472	http://citrus.hzau.edu.cn/download.php
PlantKGA_31	Gentianales	Rubiaceae	Coffea	arabica	Coffea arabica	arabian coffee	小粒咖啡	chromosome	Yes	转录本	https://www.nature.com/articles/s41598-020-61216-7	https://www.ncbi.nlm.nih.gov/genome/77?genome_assembly_id=418079
PlantKGA_34	Apiales	Apiaceae	Coriandrum	sativum	Coriandrum sativum	cilantro	芫荽	chromosome	Yes	转录本	https://onlinelibrary.wiley.com/doi/10.1111/pbi.13310	http://cgdb.bio2db.com/Download/
PlantKGA_35	Cucurbitales	Cucurbitaceae	Cucumis	melo	Cucumis melo	melo	甜瓜	chromosome	Yes	转录本	https://www.pnas.org/doi/full/10.1073/pnas.1205415109	https://www.ncbi.nlm.nih.gov/genome/10697?genome_assembly_id=39592
PlantKGA_36	Cucurbitales	Cucurbitaceae	Cucumis	sativus	Cucumis sativus	cucumber	黄瓜	chromosome	Yes	转录本	https://academic.oup.com/gigascience/article/8/6/giz072/5520540?login=false	https://ftp.cngb.org/pub/gigadb/pub/10.5524/100001_101000/100603/
PlantKGA_37	Cucurbitales	Cucurbitaceae	Cucurbita	moschata	Cucurbita moschata	cushaw	南瓜	chromosome	Yes	转录本	https://www.cell.com/molecular-plant/fulltext/S1674-2052(17)30266-6?_returnURL=https%3A%2F%2Flinkinghub.elsevier.com%2Fretrieve%2Fpii%2FS1674205217302666%3Fshowall%3Dtrue	http://cucurbitgenomics.org/ftp/genome/Cucurbita_moschata/v1/
PlantKGA_38	Cucurbitales	Cucurbitaceae	Cucurbita	pepo	Cucurbita pepo	pumpkin	西葫芦	chromosome	Yes	转录本	https://onlinelibrary.wiley.com/doi/10.1111/pbi.12860	https://www.ncbi.nlm.nih.gov/genome/12199?genome_assembly_id=380250
PlantKGA_40	Fabales	Fabaceae	Dalbergia	odorifera	Dalbergia odorifera	fragrant rosewood	降香	chromosome	Yes	转录本	https://academic.oup.com/gigascience/article/9/8/giaa084/5893771?login=false	http://gigadb.org/dataset/view/id/100760
PlantKGA_41	Apiales	Apiaceae	Daucus	carota	Daucus carota	carrot	胡萝卜	chromosome	Yes	转录本	https://www.nature.com/articles/ng.3565	https://www.ncbi.nlm.nih.gov/genome/860?genome_assembly_id=276486
PlantKGA_45	Ericales	Ebenaceae	Diospyros	lotus	Diospyros lotus	persimmon	君迁子、黑枣	chromosome	Yes	转录本	https://journals.plos.org/plosgenetics/article?id=10.1371/journal.pgen.1008566	https://drive.google.com/drive/folders/1at4LgvkDJ7E3itCrCBS0EWvdlvXbriDt
PlantKGA_46	Arecales	Arecaceae	Elaeis	guineensis	Elaeis guineensis	oil palm	油棕	chromosome	Yes	转录本	https://www.nature.com/articles/nature12309	https://www.ncbi.nlm.nih.gov/genome/2669
PlantKGA_48	Rosales	Rosaceae	Eriobotrya	japonica	Eriobotrya japonica	loquat	枇杷	chromosome	Yes	转录本	https://academic.oup.com/gigascience/article/9/3/giaa015/5788433?login=false	http://gigadb.org/dataset/100711
PlantKGA_49	Myrtales	Myrtaceae	Eucalyptus	grandis	Eucalyptus grandis	rose gum	巨桉、玫瑰桉	chromosome	Yes	转录本	https://www.nature.com/articles/nature13308	https://www.ncbi.nlm.nih.gov/genome/2181?genome_assembly_id=58726
PlantKGA_51	Caryophyllales	Polygonaceae	Fagopyrum	tataricum	Fagopyrum tataricum	tartary buckwheat	苦荞麦	chromosome	Yes	转录本	https://www.cell.com/molecular-plant/fulltext/S1674-2052(17)30243-5?_returnURL=https%3A%2F%2Flinkinghub.elsevier.com%2Fretrieve%2Fpii%2FS1674205217302435%3Fshowall%3Dtrue	http://mbkbase.org/Pinku1/
PlantKGA_53	Rosales	Moraceae	Ficus	carica	Ficus carica	common fig	无花果	chromosome	Yes	基因=转录本	https://www.nature.com/articles/srep41124	https://plantgarden.jp/en/download/t3494/t3494.G001/
PlantKGA_54	Rosales	Rosaceae	Fragaria	vesca	Fragaria vesca	woodland strawberry	草莓	chromosome	Yes	转录本	https://www.nature.com/articles/ng.740	https://www.ncbi.nlm.nih.gov/genome/3314?genome_assembly_id=34435
PlantKGA_56	Fabales	Fabaceae	Glycine	max	Glycine max	soybean	大豆	chromosome	Yes	转录本	https://www.nature.com/articles/nature08670	http://plants.ensembl.org/Glycine_max/Info/Index
PlantKGA_59	Malvales	Malvaceae	Gossypium	hirsutum	Gossypium hirsutum	cotton	陆地棉	chromosome	Yes	基因=转录本	https://www.nature.com/articles/s41588-019-0371-5	https://www.cottongen.org/species/Gossypium_hirsutum/ZJU-AD1_v2.1
PlantKGA_60	Asterales	Asteraceae	Helianthus	annuus	Helianthus annuus	sunflower	向日葵	chromosome	Yes	转录本	https://www.nature.com/articles/nature22380	https://www.ncbi.nlm.nih.gov/genome/351?genome_assembly_id=983004
PlantKGA_62	Malvales	Malvaceae	Hibiscus	cannabinus	Hibiscus cannabinus	kenaf hibiscus	大麻槿、洋麻	chromosome	Yes	转录本	https://onlinelibrary.wiley.com/doi/10.1111/pbi.13341	https://ngdc.cncb.ac.cn/search/?dbId=gwh&q=GWHACDB00000000+
PlantKGA_65	Fagales	Juglandaceae	Juglans	regia	Juglans regia	walnut	胡桃	chromosome	Yes	转录本	https://onlinelibrary.wiley.com/doi/10.1111/tpj.13207	https://www.ncbi.nlm.nih.gov/genome/17683?genome_assembly_id=955338
PlantKGA_66	Cucurbitales	Cucurbitaceae	Lagenaria	siceraria	Lagenaria siceraria	bottle gourd	葫芦	chromosome	Yes	转录本	https://onlinelibrary.wiley.com/doi/10.1111/tpj.13722	http://cucurbitgenomics.org/ftp/genome/BottleGourd/USVL1VR-Ls/
PlantKGA_68	Dipsacales	Caprifoliaceae	Lonicera	japonica	Lonicera japonica	Japanese honeysuckle	金银花	chromosome	Yes	转录本	https://nph.onlinelibrary.wiley.com/doi/10.1111/nph.16552	https://ngdc.cncb.ac.cn/search/?dbId=gwh&q=Lonicera+japonica
PlantKGA_69	Fabales	Fabaceae	Lupinus	albus	Lupinus albus	white lupin	白羽扇豆	chromosome	Yes	转录本	https://www.nature.com/articles/s41467-020-14891-z	https://www.ncbi.nlm.nih.gov/genome/15582?genome_assembly_id=770531
PlantKGA_70	Fabales	Fabaceae	Lupinus	angustifolius	Lupinus angustifolius	narrowleaf lupin	窄叶羽扇豆	chromosome	Yes	转录本	https://onlinelibrary.wiley.com/doi/10.1111/pbi.12615	https://www.ncbi.nlm.nih.gov/genome/11024?genome_assembly_id=293370
PlantKGA_72	Malpighiales	Euphorbiaceae	Manihot	esculenta	Manihot esculenta	cassave	木薯	chromosome	Yes	转录本	https://www.nature.com/articles/nbt.3535	https://www.ncbi.nlm.nih.gov/data-hub/genome/GCF_001659605.2/
PlantKGA_73	Marchantiales	Marchantiaceae	Marchantia	polymorpha	Marchantia polymorpha	liverwort	地钱	chromosome	Yes	转录本	https://www.cell.com/current-biology/fulltext/S0960-9822(19)31610-0?_returnURL=https%3A%2F%2Flinkinghub.elsevier.com%2Fretrieve%2Fpii%2FS0960982219316100%3Fshowall%3Dtrue	https://marchantia.info/download/tak1v5.1/
PlantKGA_74	Fabales	Fabaceae	Medicago	sativa	Medicago sativa	alfalfa	苜蓿	chromosome	Yes	转录本	https://www.nature.com/articles/s41467-020-16338-x	https://figshare.com/articles/dataset/genome_fasta_sequence_and_annotation_files/12327602
PlantKGA_75	Poales	Poaceae	Miscanthus	sinensis	Miscanthus sinensis	Chinese silvergrass	芒	chromosome	Yes	转录本	https://www.nature.com/articles/s41467-020-18923-6	https://genome.jgi.doe.gov/portal/pages/dynamicOrganismDownload.jsf?organism=Msinensis
PlantKGA_77	Proteales	Nelumbonaceae	Nelumbo	nucifera	Nelumbo nucifera	lotus	荷花、莲	chromosome	Yes	转录本	https://academic.oup.com/mbe/article/37/8/2394/5826357?login=false	http://nelumbo.biocloud.net/nelumbo/download/download
PlantKGA_78	Solanales	Solanaceae	Nicotiana	tabacum	Nicotiana tabacum	common tobacco	烟草	chromosome	Yes	转录本	https://www.nature.com/articles/ncomms4833	https://www.ncbi.nlm.nih.gov/genome/425?genome_assembly_id=274804
PlantKGA_83	Poales	Poaceae	Oryza	sativa	Oryza sativa	rice	水稻	chromosome	Yes	转录本	https://www.science.org/doi/10.1126/science.1068275	https://www.ncbi.nlm.nih.gov/genome/10?genome_assembly_id=22512
PlantKGA_84	Apiales	Araliaceae	Panax	ginseng	Panax ginseng	Asian ginseng	人参	chromosome	Yes	转录本	https://onlinelibrary.wiley.com/doi/10.1111/pbi.12926	http://ginsengdb.snu.ac.kr/data.php
PlantKGA_85	Ranunculales	Papaveraceae	Papaver	somniferum	Papaver somniferum	opium poppy	罂粟	chromosome	Yes	转录本	https://www.science.org/doi/10.1126/science.aat4096	https://www.ncbi.nlm.nih.gov/genome/12819?genome_assembly_id=406996
PlantKGA_86	Fabales	Fabaceae	Phaseolus	vulgaris	Phaseolus vulgaris	common bean	菜豆	chromosome	Yes	转录本	https://www.nature.com/articles/ng.3008	https://www.ncbi.nlm.nih.gov/genome/380?genome_assembly_id=48590
PlantKGA_87	Arecales	Arecaceae	Phoenix	dactylifera	Phoenix dactylifera	date palm	海枣	chromosome	Yes	转录本	https://www.nature.com/articles/s41467-019-12604-9	https://datepalmgenomehub.abudhabi.nyu.edu/?q=node/12
PlantKGA_88	Piperales	Piperaceae	Piper	nigrum	Piper nigrum	black pepper	胡椒	chromosome	Yes	基因	https://www.nature.com/articles/s41467-019-12607-6	http://cotton.hzau.edu.cn/EN/Download.htm
PlantKGA_90	Fabales	Fabaceae	Pisum	sativum	Pisum sativum	common pea	豌豆	chromosome	Yes	转录本	https://www.nature.com/articles/s41588-019-0480-1	https://urgi.versailles.inra.fr/download/pea/
PlantKGA_92	Malpighiales	Salicaceae	Populus	trichocarpa	Populus trichocarpa	black cottonwood	毛果杨	chromosome	Yes	转录本	https://www.science.org/doi/10.1126/science.1128691	https://www.ncbi.nlm.nih.gov/genome/98?genome_assembly_id=371650
PlantKGA_94	Rosales	Rosaceae	Prunus	mume	Prunus mume	Chinese plum	梅	chromosome	Yes	转录本	https://www.nature.com/articles/ncomms2290	https://www.ncbi.nlm.nih.gov/genome/13911?genome_assembly_id=44389
PlantKGA_95	Rosales	Rosaceae	Prunus	persica	Prunus persica	peach	桃	chromosome	Yes	转录本	https://www.nature.com/articles/ng.2586	https://www.ncbi.nlm.nih.gov/genome/388?genome_assembly_id=312190
PlantKGA_96	Myrtales	Lythraceae	Punica	granatum	Punica granatum	pomegranate	石榴	chromosome	Yes	转录本	https://onlinelibrary.wiley.com/doi/10.1111/pbi.13260	https://www.ncbi.nlm.nih.gov/genome/13946?genome_assembly_id=720008
PlantKGA_97	Rosales	Rosaceae	Pyrus	bretschneideri	Pyrus bretschneideri	pear	梨	chromosome	Yes	转录本	https://genome.cshlp.org/content/23/2/396	https://www.rosaceae.org/species/pyrus_bretschneideri/genome_v1.1
PlantKGA_98	Rosales	Rosaceae	Pyrus	communis	Pyrus communis	european pear	西洋梨	chromosome	Yes	转录本	https://academic.oup.com/gigascience/article/8/12/giz138/5670615?login=false	http://gigadb.org/dataset/view/id/100644/File_page/2
PlantKGA_99	Fagales	Fagaceae	Quercus	robur	Quercus robur	oak	橡树	chromosome	Yes	基因=转录本	https://www.nature.com/articles/s41477-018-0172-3	https://www.oakgenome.fr/?page_id=587
PlantKGA_100	Brassicales	Brassicaceae	Raphanus	sativus	Raphanus sativus	radish	萝卜	chromosome	Yes	转录本	https://academic.oup.com/dnaresearch/article/27/2/dsaa010/5840486?login=false	https://plantgarden.jp/en/download/t3726/t3726.G003/
PlantKGA_102	Rosales	Rosaceae	Rosa	chinensis	Rosa chinensis	rose	月季	chromosome	Yes	转录本	https://www.nature.com/articles/s41588-018-0110-3	https://www.rosaceae.org/analysis/282
PlantKGA_105	Lamiales	Lamiaceae	Salvia	miltiorrhiza	Salvia miltiorrhiza	Chinese red sage	丹参	chromosome	Yes	转录本	https://acsess.onlinelibrary.wiley.com/doi/10.1002/tpg2.20041	https://ngdc.cncb.ac.cn/gwh/Assembly/10381/show
PlantKGA_106	Lamiales	Lamiaceae	Salvia	splendens	Salvia splendens	scarlet sage	一串红	chromosome	Yes	转录本	https://academic.oup.com/gigascience/article/7/7/giy068/5040257?login=false	http://gigadb.org/dataset/100463
PlantKGA_107	Selaginellales	Selaginellaceae	Selaginella	moellendorffii	Selaginella moellendorffii	gemmiferous spikemoss	江南卷柏	chromosome	Yes	转录本	https://www.science.org/doi/10.1126/science.1203810	https://www.ncbi.nlm.nih.gov/genome/?term=txid88036[orgn]
PlantKGA_110	Solanales	Solanaceae	Solanum	chacoense	Solanum chacoense	wild potato	野生马铃薯	chromosome	Yes	基因=转录本	https://onlinelibrary.wiley.com/doi/10.1111/tpj.13857	https://datadryad.org/stash/dataset/doi:10.5061/dryad.kc835
PlantKGA_111	Solanales	Solanaceae	Solanum	melongena	Solanum melongena	eggplant	茄子	chromosome	Yes	转录本	https://academic.oup.com/hr/article/doi/10.1038/s41438-020-00391-0/6445697?login=true	http://eggplant-hq.cn/Eggplant/download
PlantKGA_112	Solanales	Solanaceae	Solanum	tuberosum	Solanum tuberosum	potato	马铃薯	chromosome	Yes	基因=转录本	https://www.nature.com/articles/s41588-020-0699-x	http://spuddb.uga.edu/rh_potato_download.shtml
PlantKGA_113	Fabales	Fabaceae	Spatholobus	suberectus	Spatholobus suberectus	NA	密花豆	chromosome	Yes	转录本	https://www.nature.com/articles/s41597-019-0110-x	https://www.ncbi.nlm.nih.gov/data-hub/genome/GCA_004329165.1/
PlantKGA_114	Caryophyllales	Amaranthaceae	Spinacia	oleracea	Spinacia oleracea	spinach	菠菜	chromosome	Yes	基因=转录本	https://www.nature.com/articles/ncomms15275	http://www.spinachbase.org/download
PlantKGA_115	Lamiales	Lamiaceae	Tectona	grandis	Tectona grandis	teak	柚木	chromosome	Yes	转录本	https://academic.oup.com/gigascience/article/8/3/giz005/5304368?login=true	http://gigadb.org/dataset/100550
PlantKGA_116	Malvales	Malvaceae	Theobroma	cacao	Theobroma cacao	cacao	可可	chromosome	Yes	转录本	https://www.nature.com/articles/ng.736	https://cocoa-genome-hub.southgreen.fr/download
PlantKGA_117	Celastrales	Celastraceae	Tripterygium	wilfordii	Tripterygium wilfordii	thunder god vine	雷公藤	chromosome	Yes	转录本	https://www.nature.com/articles/s41467-020-14776-1	https://www.ncbi.nlm.nih.gov/genome/12874?genome_assembly_id=919160
PlantKGA_118	Poales	Poaceae	Triticum	aestivum	Triticum aestivum	wheat	小麦	chromosome	Yes	转录本	https://www.science.org/doi/10.1126/science.aar7191	https://urgi.versailles.inrae.fr/download/iwgsc/IWGSC_RefSeq_Annotations/v2.1/
PlantKGA_119	Trochodendrales	Trochodendraceae	Trochodendron	aralioides	Trochodendron aralioides	wheel tree	昆栏树	chromosome	Yes	转录本	https://academic.oup.com/gigascience/article/8/11/giz136/5628061?login=false	http://gigadb.org/dataset/100657
PlantKGA_120	Fabales	Fabaceae	Vigna	angularis	Vigna angularis	azuki bean	赤豆	chromosome	Yes	转录本	https://www.pnas.org/doi/full/10.1073/pnas.1420949112	https://www.ncbi.nlm.nih.gov/genome/11109?genome_assembly_id=244761
PlantKGA_121	Fabales	Fabaceae	Vigna	unguiculata	Vigna unguiculata	cowpea	豇豆	chromosome	Yes	转录本	https://onlinelibrary.wiley.com/doi/10.1111/tpj.14349	https://www.ncbi.nlm.nih.gov/data-hub/genome/GCF_004118075.2/
PlantKGA_122	Vitales	Vitaceae	Vitis	vinifera	Vitis vinifera	grape	葡萄	chromosome	Yes	转录本	https://www.nature.com/articles/s41467-020-16700-z	http://www.grapegenomics.com/pages/VvCabSauv/download.php
PlantKGA_123	Poales	Poaceae	Zea	mays	Zea mays	maize	玉米	chromosome	Yes	转录本	https://www.nature.com/articles/s41588-018-0158-0	https://download.maizegdb.org/Zm-W22-REFERENCE-NRGENE-2.0/
PlantKGA_124	Rosales	Rhamnaceae	Ziziphus	jujuba	Ziziphus jujuba	jujube	枣	chromosome	Yes	转录本	https://www.nature.com/articles/ncomms6315	https://www.ncbi.nlm.nih.gov/genome/15586?genome_assembly_id=219393
PlantKGA_125	Alismatales	Zosteraceae	Zostera	marina	Zostera marina	eelgrass	大叶藻	chromosome	Yes	转录本	https://www.nature.com/articles/nature16548	https://bioinformatics.psb.ugent.be/gdb/zostera/
PlantKGA_126	Lamiales	Acanthaceae	Strobilanthes	cusia	Strobilanthes cusia	assam indigo	板蓝、马蓝	chromosome	Yes	转录本	https://onlinelibrary.wiley.com/doi/10.1111/tpj.14992	http://indigoid-plant.iflora.cn/
PlantKGA_127	Fabales	Fabaceae	Senna	tora	Senna tora	sickle senna	决明	chromosome	Yes	转录本	https://www.nature.com/articles/s41467-020-19681-1	https://www.ncbi.nlm.nih.gov/genome/44961?genome_assembly_id=1470505
PlantKGA_128	Fabales	Fabaceae	Artemisia	annua	Artemisia annua	sweet wormwood or Qinghao	黄花蒿	chromosome	Yes	转录本	https://www.cell.com/molecular-plant/fulltext/S1674-2052(18)30123-0?_returnURL=https%3A%2F%2Flinkinghub.elsevier.com%2Fretrieve%2Fpii%2FS1674205218301230%3Fshowall%3Dtrue	https://ftp.ncbi.nlm.nih.gov/genomes/all/GCA/003/112/345/GCA_003112345.1_ASM311234v1/
PlantKGA_129	Asterales	Asteraceae	Chrysanthemum	nankingense	Chrysanthemum nankingense	juhuanao	菊花脑	chromosome	Yes	转录本	https://www.cell.com/molecular-plant/fulltext/S1674-2052(18)30308-3?_returnURL=https%3A%2F%2Flinkinghub.elsevier.com%2Fretrieve%2Fpii%2FS1674205218303083%3Fshowall%3Dtrue	http://www.amwayabrc.com/download.htm
PlantKGA_130	Laurales	Lauraceae	Cinnamomum	kanehirae	Cinnamomum kanehirae	stout camphor tree	牛樟	chromosome	Yes	转录本	https://www.nature.com/articles/s41477-018-0337-0	https://www.ncbi.nlm.nih.gov/data-hub/genome/GCA_003546025.1/
PlantKGA_132	Sapindales	Meliaceae	Toona	sinensis	Toona sinensis	Chinese mahogany	香椿	chromosome	Yes	基因=转录本	https://onlinelibrary.wiley.com/doi/10.1111/1755-0998.13318	https://ftp.cngb.org/pub/CNSA/data1/CNP0000958/CNS0203218/CNA0019196/
PlantKGA_134	Sapindales	Sapindaceae	Acer	truncatum	Acer truncatum	purpleblow maple	元宝枫	chromosome	Yes	基因=转录本	https://onlinelibrary.wiley.com/doi/10.1111/tpj.14954	https://figshare.com/articles/dataset/The_Acer_truncatum_genome_provides_insights_into_the_nervonic_acid_biosynthesis/12986237/2
PlantKGA_135	Fabales	Fabaceae	Cercis	chinensis	Cercis chinensis	Chinese redbud	中国紫荆	chromosome	Yes	转录本	https://www.sciencedirect.com/science/article/pii/S2590346222002541?via%3Dihub	https://ngdc.cncb.ac.cn/gwh/Assembly/24066/show
PlantKGA_393	Caryophyllales	Caryophyllaceae	Gypsophila	paniculata	Gypsophila paniculata		满天星	chromosome	Yes	转录本	https://academic.oup.com/hr/advance-article/doi/10.1093/hr/uhac176/6674669	https://ftp.cngb.org/pub/CNSA/data4/CNP0003304/CNS0579838/CNA0050895/
PlantKGA_395	Fabales	Fabaceae	Pisum	sativum L.	Pisum sativum L.	Pea	豌豆	chromosome	Yes	转录本	https://www.nature.com/articles/s41588-022-01172-2#data-availability	https://www.peagdb.com/download/
PlantKGA_399	Poales	Poaceae	Oryza	glaberrima	Oryza glaberrima	CG14	非洲栽培稻	chromosome	Yes	转录本	https://www.sciencedirect.com/science/article/pii/S009286742100581X?via%6Dihub	https://ricerc.sicau.edu.cn/
PlantKGA_430	Fabales	Fabaceae	Vigna	umbellata	Vigna umbellata	Rice bean	饭豆	chromosome	Yes	转录本	https://www.nature.com/articles/s41467-022-33515-2#data-availability	https://figshare.com/articles/dataset/Genome_assembly_annotation_for_rice_bean/19420058
PlantKGA_431	Apiales	Araliaceae	Panax	notoginseng	Panax notoginseng		三七	chromosome	Yes	转录本	https://onlinelibrary.wiley.com/doi/full/10.1111/pbi.13558
