# Supplementary material for: PlantNLRatlas: a comprehensive dataset of full- and partial-length NLR resistance genes across 100 chromosome-level plant genomes
Source: Front Plant Sci. 2023 Apr 14;14:1178069. doi: 10.3389/fpls.2023.1178069 (PMC10146310; doi:10.3389/fpls.2023.1178069)
Supplement: Supplementary Table 2 — The PlantNLRatlas dataset. [file Table_2.xlsx]

## Sheet: Sheet1
ID	Order	Family	Genus	Species	Latin	English	Chinese	Level	NLRs	ID.type	input.id	pep.id	gene.id	group	group.2	chrom	start	end	strand	db	db.id	domain.name.1	domain.name.2	domain.start	domain.end	domain.seq	pvalue	pep.seq	pep.len	gene.len	Paper.link	Download.link
PlantKGA_431	Apiales	Araliaceae	Panax	notoginseng	Panax notoginseng		三七	chromosome	Yes	转录本	Pno03G004066t1	Pno03G004066t11288xxPlantKGA_431	Pno03G004066	TN	partial	3	183920810	183927037	+	Pfam	PF00931	NB-ARC domain	NB-ARC	223	433	WLNDGSADIDMLVIFGMGGVGKTTIAKIVYNLNHHIFERSCFLANINQSNDLRTLQRQLLSNILKGQKEKIYNVDEGTVRIEDAIRCNKVFIVLDDVDDVNQLDILIGTQDFYPGSKIIITTRNKCLLRARKIHKLHDVELLDDDESLKLFSWHAFRQDHPLEGYSDKAVRVLQRCGGLPLALEVLGCSLTGKSINVWKSALQKLEAILNA	5.7e-30	METLRAQEASSSTSRCSYHVFLSFRGTDTRKTFTDHLYTALVQAGFRTFRDDEGLERGKHVKSELNRAIQQSRLSIIVFSKDYASSKWCLDELLMILECKKMSGHLVVPVFYHVEPSDVRYQTGSIKEAFDRYEEKLMAKNDDDDDDDESKKEWMDRVNGWRAALKEVADLSGMALQNLADGHESKFIQEIIKVVTAKVNRPALKIPQFPVGLHSRTKSINLWLNDGSADIDMLVIFGMGGVGKTTIAKIVYNLNHHIFERSCFLANINQSNDLRTLQRQLLSNILKGQKEKIYNVDEGTVRIEDAIRCNKVFIVLDDVDDVNQLDILIGTQDFYPGSKIIITTRNKCLLRARKIHKLHDVELLDDDESLKLFSWHAFRQDHPLEGYSDKAVRVLQRCG…	1181	6228	https://onlinelibrary.wiley.com/doi/full/10.1111/pbi.13558
PlantKGA_431	Apiales	Araliaceae	Panax	notoginseng	Panax notoginseng		三七	chromosome	Yes	转录本	Pno03G004066t1	Pno03G004066t11288xxPlantKGA_431	Pno03G004066	TN	partial	3	183920810	183927037	+	Pfam	PF01582	TIR domain	Toll/interleukin-1 receptor homology (TIR) domain	18	195	YHVFLSFRGTDTRKTFTDHLYTALVQAGFRTFRDDEGLERGKHVKSELNRAIQQSRLSIIVFSKDYASSKWCLDELLMILECKKMSGHLVVPVFYHVEPSDVRYQTGSIKEAFDRYEEKLMAKNDDDDDDDESKKEWMDRVNGWRAALKEVADLSGMALQNLADGHESKFIQEIIKVV	2e-38	METLRAQEASSSTSRCSYHVFLSFRGTDTRKTFTDHLYTALVQAGFRTFRDDEGLERGKHVKSELNRAIQQSRLSIIVFSKDYASSKWCLDELLMILECKKMSGHLVVPVFYHVEPSDVRYQTGSIKEAFDRYEEKLMAKNDDDDDDDESKKEWMDRVNGWRAALKEVADLSGMALQNLADGHESKFIQEIIKVVTAKVNRPALKIPQFPVGLHSRTKSINLWLNDGSADIDMLVIFGMGGVGKTTIAKIVYNLNHHIFERSCFLANINQSNDLRTLQRQLLSNILKGQKEKIYNVDEGTVRIEDAIRCNKVFIVLDDVDDVNQLDILIGTQDFYPGSKIIITTRNKCLLRARKIHKLHDVELLDDDESLKLFSWHAFRQDHPLEGYSDKAVRVLQRCG…	1181	6228	https://onlinelibrary.wiley.com/doi/full/10.1111/pbi.13558
PlantKGA_431	Apiales	Araliaceae	Panax	notoginseng	Panax notoginseng		三七	chromosome	Yes	转录本	Pno03G004070t1	Pno03G004070t11288xxPlantKGA_431	Pno03G004070	TN	partial	3	183966269	183971639	+	Pfam	PF01582	TIR domain	Toll/interleukin-1 receptor homology (TIR) domain	18	193	YHVFLSFRGTDTRKTFTDHLYTALVQAGFRTFRDDEGLERGKHVKSELNRAIQQSRLSIIVFSKDYASSKWCLDELLMILECKKMSGHLVVPVFYHVEPSDVRYQTGSIKEAFDRYEEKLMAKNDDDESKKERMDRVNGWRAALKEVADLSGMVLQNVADGHESKFVQEIIKVVTA	1.2e-39	METLRAQEASSSTSRCSYHVFLSFRGTDTRKTFTDHLYTALVQAGFRTFRDDEGLERGKHVKSELNRAIQQSRLSIIVFSKDYASSKWCLDELLMILECKKMSGHLVVPVFYHVEPSDVRYQTGSIKEAFDRYEEKLMAKNDDDESKKERMDRVNGWRAALKEVADLSGMVLQNVADGHESKFVQEIIKVVTAKVNRPALKIHQFPVGLHPRTKSINLWLNDGSVDIDTLVIFGMGGVGKTTIAKIVYNINHHIFERSCFLANINQSNDLLTLQRQLLSNILKGQKEKIYNVDQGTVKIEDAIRCNKVFIVLDDVDDVNQLDILIGTQDFYPGSKIIITSRNKCLLRARKIHKLHQVELLDANESLKLFSWHAFRQDHPLKEYNDETVRVVQRCGGLPL…	1177	5371	https://onlinelibrary.wiley.com/doi/full/10.1111/pbi.13558
PlantKGA_431	Apiales	Araliaceae	Panax	notoginseng	Panax notoginseng		三七	chromosome	Yes	转录本	Pno03G004070t1	Pno03G004070t11288xxPlantKGA_431	Pno03G004070	TN	partial	3	183966269	183971639	+	Pfam	PF00931	NB-ARC domain	NB-ARC	219	429	WLNDGSVDIDTLVIFGMGGVGKTTIAKIVYNINHHIFERSCFLANINQSNDLLTLQRQLLSNILKGQKEKIYNVDQGTVKIEDAIRCNKVFIVLDDVDDVNQLDILIGTQDFYPGSKIIITSRNKCLLRARKIHKLHQVELLDANESLKLFSWHAFRQDHPLKEYNDETVRVVQRCGGLPLALEVLGCSLTGKSINVWKSALQKLEAILNA	9.2e-29	METLRAQEASSSTSRCSYHVFLSFRGTDTRKTFTDHLYTALVQAGFRTFRDDEGLERGKHVKSELNRAIQQSRLSIIVFSKDYASSKWCLDELLMILECKKMSGHLVVPVFYHVEPSDVRYQTGSIKEAFDRYEEKLMAKNDDDESKKERMDRVNGWRAALKEVADLSGMVLQNVADGHESKFVQEIIKVVTAKVNRPALKIHQFPVGLHPRTKSINLWLNDGSVDIDTLVIFGMGGVGKTTIAKIVYNINHHIFERSCFLANINQSNDLLTLQRQLLSNILKGQKEKIYNVDQGTVKIEDAIRCNKVFIVLDDVDDVNQLDILIGTQDFYPGSKIIITSRNKCLLRARKIHKLHQVELLDANESLKLFSWHAFRQDHPLKEYNDETVRVVQRCGGLPL…	1177	5371	https://onlinelibrary.wiley.com/doi/full/10.1111/pbi.13558
PlantKGA_431	Apiales	Araliaceae	Panax	notoginseng	Panax notoginseng		三七	chromosome	Yes	转录本	Pno03G004105t1	Pno03G004105t11288xxPlantKGA_431	Pno03G004105	TN	partial	3	184657892	184663483	-	Pfam	PF00931	NB-ARC domain	NB-ARC	219	429	WLNDGSADIDMLVIFGMGGLGKTTIAKSVYNLNHHIFERSCFLANINQSNDLLTLQRQLLSNILKGQKEMIYNVDEGTVKIEDAIRCNKVFIVLDDVDDVNQLDILIGTQDFYPGSKIIITTRNKCLLRDRKIHKLHQVELLDVDESLKLFSWHAFRQDHPLEEYSDKAVRVVQRCGGLPLALKVLGCSLTGKTINVWESALQKLEAILNA	2.6e-31	METLRPQEASSSTSRCSYHVFLSFRGTETRKTFTDHLYTALVQAGFRTFRDDEGLERGKLVKSELNRAIQQSRLSIIVFSKDYASSKWCLDELLMILECKKISGHLVVPVFYHVEPSDVRYQTGSIKEAFDRYEEKLMEKNDDDDSKKEWMDRVNGWRAALKEVADLSGMVLENVADGHESKFIQEIIKVVTAKVNRPALKIPQFPVGLHSRTRSINLWLNDGSADIDMLVIFGMGGLGKTTIAKSVYNLNHHIFERSCFLANINQSNDLLTLQRQLLSNILKGQKEMIYNVDEGTVKIEDAIRCNKVFIVLDDVDDVNQLDILIGTQDFYPGSKIIITTRNKCLLRDRKIHKLHQVELLDVDESLKLFSWHAFRQDHPLEEYSDKAVRVVQRCGGLPL…	1213	5592	https://onlinelibrary.wiley.com/doi/full/10.1111/pbi.13558
PlantKGA_431	Apiales	Araliaceae	Panax	notoginseng	Panax notoginseng		三七	chromosome	Yes	转录本	Pno03G004105t1	Pno03G004105t11288xxPlantKGA_431	Pno03G004105	TN	partial	3	184657892	184663483	-	Pfam	PF01582	TIR domain	Toll/interleukin-1 receptor homology (TIR) domain	18	193	YHVFLSFRGTETRKTFTDHLYTALVQAGFRTFRDDEGLERGKLVKSELNRAIQQSRLSIIVFSKDYASSKWCLDELLMILECKKISGHLVVPVFYHVEPSDVRYQTGSIKEAFDRYEEKLMEKNDDDDSKKEWMDRVNGWRAALKEVADLSGMVLENVADGHESKFIQEIIKVVTA	1.5e-38	METLRPQEASSSTSRCSYHVFLSFRGTETRKTFTDHLYTALVQAGFRTFRDDEGLERGKLVKSELNRAIQQSRLSIIVFSKDYASSKWCLDELLMILECKKISGHLVVPVFYHVEPSDVRYQTGSIKEAFDRYEEKLMEKNDDDDSKKEWMDRVNGWRAALKEVADLSGMVLENVADGHESKFIQEIIKVVTAKVNRPALKIPQFPVGLHSRTRSINLWLNDGSADIDMLVIFGMGGLGKTTIAKSVYNLNHHIFERSCFLANINQSNDLLTLQRQLLSNILKGQKEMIYNVDEGTVKIEDAIRCNKVFIVLDDVDDVNQLDILIGTQDFYPGSKIIITTRNKCLLRDRKIHKLHQVELLDVDESLKLFSWHAFRQDHPLEEYSDKAVRVVQRCGGLPL…	1213	5592	https://onlinelibrary.wiley.com/doi/full/10.1111/pbi.13558
PlantKGA_431	Apiales	Araliaceae	Panax	notoginseng	Panax notoginseng		三七	chromosome	Yes	转录本	Pno04G002409t1	Pno04G002409t11288xxPlantKGA_431	Pno04G002409	TN	partial	4	15383016	15384731	+	Pfam	PF01582	TIR domain	Toll/interleukin-1 receptor homology (TIR) domain	2	106	SIIVFSKNYASSRWCLDELVEIIECKRTMGQLVLPLYYDVEPSVVRYQTGSYAKAFQHFVAEWDKPKVKNWRAALKEAADLFGHVLANEENRNEARFIENIVRKV	5.3e-25	MSIIVFSKNYASSRWCLDELVEIIECKRTMGQLVLPLYYDVEPSVVRYQTGSYAKAFQHFVAEWDKPKVKNWRAALKEAADLFGHVLANEENRNEARFIENIVRKVQPEVNLRFLNVPEPLIRLDSNFNCINTLLSIESDDVGTIGIYGMGGIGKTTVSKAVYNKHLNHFEGSAFVENIKDISKLLDGLLRLQKNLLSQLQEKKIKLSHSDEGINWIKKICCSKRFLILLDDLDDLDQIKKLAGHKRWFSAGSKVIIVTRDAKLLKEAQVDHLYEMKVLNNDESLELFRWNAFGEGIPFPSEDYKLLSIDTTTYCGGLPLALEVIGRHMFGLTPLSWKIALEEFHKYPEKTIQNKLKISYDALSEH	366	1716	https://onlinelibrary.wiley.com/doi/full/10.1111/pbi.13558
PlantKGA_431	Apiales	Araliaceae	Panax	notoginseng	Panax notoginseng		三七	chromosome	Yes	转录本	Pno04G002409t1	Pno04G002409t11288xxPlantKGA_431	Pno04G002409	TN	partial	4	15383016	15384731	+	Pfam	PF00931	NB-ARC domain	NB-ARC	138	362	ESDDVGTIGIYGMGGIGKTTVSKAVYNKHLNHFEGSAFVENIKDISKLLDGLLRLQKNLLSQLQEKKIKLSHSDEGINWIKKICCSKRFLILLDDLDDLDQIKKLAGHKRWFSAGSKVIIVTRDAKLLKEAQVDHLYEMKVLNNDESLELFRWNAFGEGIPFPSEDYKLLSIDTTTYCGGLPLALEVIGRHMFGLTPLSWKIALEEFHKYPEKTIQNKLKISYDA	7.7e-27	MSIIVFSKNYASSRWCLDELVEIIECKRTMGQLVLPLYYDVEPSVVRYQTGSYAKAFQHFVAEWDKPKVKNWRAALKEAADLFGHVLANEENRNEARFIENIVRKVQPEVNLRFLNVPEPLIRLDSNFNCINTLLSIESDDVGTIGIYGMGGIGKTTVSKAVYNKHLNHFEGSAFVENIKDISKLLDGLLRLQKNLLSQLQEKKIKLSHSDEGINWIKKICCSKRFLILLDDLDDLDQIKKLAGHKRWFSAGSKVIIVTRDAKLLKEAQVDHLYEMKVLNNDESLELFRWNAFGEGIPFPSEDYKLLSIDTTTYCGGLPLALEVIGRHMFGLTPLSWKIALEEFHKYPEKTIQNKLKISYDALSEH	366	1716	https://onlinelibrary.wiley.com/doi/full/10.1111/pbi.13558
PlantKGA_431	Apiales	Araliaceae	Panax	notoginseng	Panax notoginseng		三七	chromosome	Yes	转录本	Pno04G002433t1	Pno04G002433t11288xxPlantKGA_431	Pno04G002433	TN	partial	4	15436092	15437900	+	Pfam	PF00931	NB-ARC domain	NB-ARC	138	176	ESDDVGTIGIYGMGGIGKTTVSKAVYNKHLNHFEGSAFV	1.5e-06	MSIIVFSKNYASSRWCLDELVEIIECKRTMGQLVLPLYYDVEPSVVRYQTGSYAKAFQHFVAEWDKPKVKNWRAALKEAVDLFGYVLANEENRNEARFIEKIVRKVQPEVNLRFLNVPEPLIRLDSNFNCINTLLSIESDDVGTIGIYGMGGIGKTTVSKAVYNKHLNHFEGSAFVENIKDISKLSDGHKRWFSAGSKVIIVTRDAKLLKEAQVDHLYEMKVLNNDESLELFRWNAFGEGIPFPSEDYKLLSIDTTTYCGGLPLALEVIGRHMFGLTPLSWKIALEEFHKYPEKTIQNKLKISYDALSEH	310	1809	https://onlinelibrary.wiley.com/doi/full/10.1111/pbi.13558
PlantKGA_431	Apiales	Araliaceae	Panax	notoginseng	Panax notoginseng		三七	chromosome	Yes	转录本	Pno04G002433t1	Pno04G002433t11288xxPlantKGA_431	Pno04G002433	TN	partial	4	15436092	15437900	+	Pfam	PF00931	NB-ARC domain	NB-ARC	194	306	SAGSKVIIVTRDAKLLKEAQVDHLYEMKVLNNDESLELFRWNAFGEGIPFPSEDYKLLSIDTTTYCGGLPLALEVIGRHMFGLTPLSWKIALEEFHKYPEKTIQNKLKISYDA	4.4e-09	MSIIVFSKNYASSRWCLDELVEIIECKRTMGQLVLPLYYDVEPSVVRYQTGSYAKAFQHFVAEWDKPKVKNWRAALKEAVDLFGYVLANEENRNEARFIEKIVRKVQPEVNLRFLNVPEPLIRLDSNFNCINTLLSIESDDVGTIGIYGMGGIGKTTVSKAVYNKHLNHFEGSAFVENIKDISKLSDGHKRWFSAGSKVIIVTRDAKLLKEAQVDHLYEMKVLNNDESLELFRWNAFGEGIPFPSEDYKLLSIDTTTYCGGLPLALEVIGRHMFGLTPLSWKIALEEFHKYPEKTIQNKLKISYDALSEH	310	1809	https://onlinelibrary.wiley.com/doi/full/10.1111/pbi.13558
PlantKGA_431	Apiales	Araliaceae	Panax	notoginseng	Panax notoginseng		三七	chromosome	Yes	转录本	Pno04G002433t1	Pno04G002433t11288xxPlantKGA_431	Pno04G002433	TN	partial	4	15436092	15437900	+	Pfam	PF01582	TIR domain	Toll/interleukin-1 receptor homology (TIR) domain	2	106	SIIVFSKNYASSRWCLDELVEIIECKRTMGQLVLPLYYDVEPSVVRYQTGSYAKAFQHFVAEWDKPKVKNWRAALKEAVDLFGYVLANEENRNEARFIEKIVRKV	1.9e-25	MSIIVFSKNYASSRWCLDELVEIIECKRTMGQLVLPLYYDVEPSVVRYQTGSYAKAFQHFVAEWDKPKVKNWRAALKEAVDLFGYVLANEENRNEARFIEKIVRKVQPEVNLRFLNVPEPLIRLDSNFNCINTLLSIESDDVGTIGIYGMGGIGKTTVSKAVYNKHLNHFEGSAFVENIKDISKLSDGHKRWFSAGSKVIIVTRDAKLLKEAQVDHLYEMKVLNNDESLELFRWNAFGEGIPFPSEDYKLLSIDTTTYCGGLPLALEVIGRHMFGLTPLSWKIALEEFHKYPEKTIQNKLKISYDALSEH	310	1809	https://onlinelibrary.wiley.com/doi/full/10.1111/pbi.13558
PlantKGA_431	Apiales	Araliaceae	Panax	notoginseng	Panax notoginseng		三七	chromosome	Yes	转录本	Pno07G001727t2	Pno07G001727t21288xxPlantKGA_431	Pno07G001727	TN	partial	7	140986437	141003352	-	Pfam	PF00931	NB-ARC domain	NB-ARC	124	335	WLNDGSADVNMLVIFGIGGMGKTTAAIFVYNLNHHIFERSCFLANIRETCNQLNGLLNLQTQLLSRILKGQIEKIYNDYEGTTKIEDALGSNRVFIVLDDVDDVNQLDVLIGTQDLYPGSKIIITTRNKWLLKARKIHTLHEVEILDDDESLELFSWHAFGQDHPLEGYSHTAVRVVQRCGGLPLALKVLRCSLTGKSINVWESALQKLEAI	1.8e-24	MILECKKISGHLVVPVFYHVEPSDVRYQIGCIKKAFDRYEDKLMEKNDDESKKEWMDRVNGWRAALKEVADLSGMVLQNQADGHESKFIQEIIKVVTAKVSRPALKIPKFHVGLHSRTKSINLWLNDGSADVNMLVIFGIGGMGKTTAAIFVYNLNHHIFERSCFLANIRETCNQLNGLLNLQTQLLSRILKGQIEKIYNDYEGTTKIEDALGSNRVFIVLDDVDDVNQLDVLIGTQDLYPGSKIIITTRNKWLLKARKIHTLHEVEILDDDESLELFSWHAFGQDHPLEGYSHTAVRVVQRCGGLPLALKVLRCSLTGKSINVWESALQKLEAILNAEILEKLKISYDLLQDDHDKNLFLHIACFFVGEDKSYIVTILDKCGYSTEVGMQNLIEKSLL…	1117	16916	https://onlinelibrary.wiley.com/doi/full/10.1111/pbi.13558
PlantKGA_431	Apiales	Araliaceae	Panax	notoginseng	Panax notoginseng		三七	chromosome	Yes	转录本	Pno07G001727t2	Pno07G001727t21288xxPlantKGA_431	Pno07G001727	TN	partial	7	140986437	141003352	-	Pfam	PF01582	TIR domain	Toll/interleukin-1 receptor homology (TIR) domain	2	97	ILECKKISGHLVVPVFYHVEPSDVRYQIGCIKKAFDRYEDKLMEKNDDESKKEWMDRVNGWRAALKEVADLSGMVLQNQADGHESKFIQEIIKVVT	4e-06	MILECKKISGHLVVPVFYHVEPSDVRYQIGCIKKAFDRYEDKLMEKNDDESKKEWMDRVNGWRAALKEVADLSGMVLQNQADGHESKFIQEIIKVVTAKVSRPALKIPKFHVGLHSRTKSINLWLNDGSADVNMLVIFGIGGMGKTTAAIFVYNLNHHIFERSCFLANIRETCNQLNGLLNLQTQLLSRILKGQIEKIYNDYEGTTKIEDALGSNRVFIVLDDVDDVNQLDVLIGTQDLYPGSKIIITTRNKWLLKARKIHTLHEVEILDDDESLELFSWHAFGQDHPLEGYSHTAVRVVQRCGGLPLALKVLRCSLTGKSINVWESALQKLEAILNAEILEKLKISYDLLQDDHDKNLFLHIACFFVGEDKSYIVTILDKCGYSTEVGMQNLIEKSLL…	1117	16916	https://onlinelibrary.wiley.com/doi/full/10.1111/pbi.13558
PlantKGA_431	Apiales	Araliaceae	Panax	notoginseng	Panax notoginseng		三七	chromosome	Yes	转录本	Pno07G002914t1	Pno07G002914t11288xxPlantKGA_431	Pno07G002914	TN	partial	7	165160522	165167634	+	Pfam	PF00931	NB-ARC domain	NB-ARC	291	510	KIDLWLRDGSTSVSIMMICGIGGIGKTTIAKFVFNKNYENFDGSSFLMDINEQSKTTKGFIGLQNQLLSDICRRKKGDINNIDEGIIKIQNALRCKRVLLVLDNVDEFNQLYGILGMRDWFFPGSKIIITSRRESLLTPDEIYEVYKVETLSRGESIELFSLHAFKQYHPTENYIEHTERVVHYCEGLPLALQVLGCSLSTQNVNVWGNALEKLETIPNG	4.4e-26	MGVDYYDILKGNRNASDEDLKKAYRRLAMIWHPDKNPTNKREAEAKFKNISEAYDVLRDPQKNCLDFSVTQLAELYIMDVVRTQEASFSSSRCTYQVFLSFRGVDTRKTFTSHLYTALVQAGFHTFRDDDEIERGNNIKSELEKAIQQSRISIIVFSKNYASSRWCLDELLMILERKRTSKRVVLPVFYHVDPSQVRYQSGSIGEAFDRYEEKLKKETNNERKKEFTDKVRRWKGALREAADLSGMELKDQDIGDESKFIQKVVTEVQHKLNRKVLDEGPYLVGIHDRTRKIDLWLRDGSTSVSIMMICGIGGIGKTTIAKFVFNKNYENFDGSSFLMDINEQSKTTKGFIGLQNQLLSDICRRKKGDINNIDEGIIKIQNALRCKRVLLVLDNVDEFN…	1276	7113	https://onlinelibrary.wiley.com/doi/full/10.1111/pbi.13558
PlantKGA_431	Apiales	Araliaceae	Panax	notoginseng	Panax notoginseng		三七	chromosome	Yes	转录本	Pno07G002914t1	Pno07G002914t11288xxPlantKGA_431	Pno07G002914	TN	partial	7	165160522	165167634	+	Pfam	PF01582	TIR domain	Toll/interleukin-1 receptor homology (TIR) domain	95	274	YQVFLSFRGVDTRKTFTSHLYTALVQAGFHTFRDDDEIERGNNIKSELEKAIQQSRISIIVFSKNYASSRWCLDELLMILERKRTSKRVVLPVFYHVDPSQVRYQSGSIGEAFDRYEEKLKKETNNERKKEFTDKVRRWKGALREAADLSGMELKDQDIGDESKFIQKVVTEVQHKLNRK	7.7e-46	MGVDYYDILKGNRNASDEDLKKAYRRLAMIWHPDKNPTNKREAEAKFKNISEAYDVLRDPQKNCLDFSVTQLAELYIMDVVRTQEASFSSSRCTYQVFLSFRGVDTRKTFTSHLYTALVQAGFHTFRDDDEIERGNNIKSELEKAIQQSRISIIVFSKNYASSRWCLDELLMILERKRTSKRVVLPVFYHVDPSQVRYQSGSIGEAFDRYEEKLKKETNNERKKEFTDKVRRWKGALREAADLSGMELKDQDIGDESKFIQKVVTEVQHKLNRKVLDEGPYLVGIHDRTRKIDLWLRDGSTSVSIMMICGIGGIGKTTIAKFVFNKNYENFDGSSFLMDINEQSKTTKGFIGLQNQLLSDICRRKKGDINNIDEGIIKIQNALRCKRVLLVLDNVDEFN…	1276	7113	https://onlinelibrary.wiley.com/doi/full/10.1111/pbi.13558
PlantKGA_431	Apiales	Araliaceae	Panax	notoginseng	Panax notoginseng		三七	chromosome	Yes	转录本	Pno07G002928t1	Pno07G002928t11288xxPlantKGA_431	Pno07G002928	TN	partial	7	165392385	165396813	+	Pfam	PF00931	NB-ARC domain	NB-ARC	216	426	VQNGSNDVDILVIYGMGGIGKTTIAKTIYNLNFDSFEGSSFLANIRDASEQPNGLVRLQRQLLSDILSGRKEKIYNVDEGAIKIRDVVSCKRILLVLDDVDQLEQLNAVLGMRDWFHPRSKIILTTRHKHLIKSNDLCKMYEVNELKVDESLQLFSWHAFGQEHPNEGYVEHCKGILQHCGGVPLALEVIGSFLFGKDIDIWVSQLEKLER	1.3e-27	MAAASPREASSTTFQYSYHVYLSFRGEDTRKTFTDHLYTTLTNAGIRTFRDDDELPRGENIESKLQKAIQESKISIVVFSKNYASSRWCLDELVKILEHKKNSTNHMILPVFYHVVPTQIRHQTGSFADAFSKHVERLKSKNDEKKREGMEKVERWKAALSEVADLSGMELQDGQEAKFIQEIVKEIVKKLKRSVLRVPDHLIGMKFHVSDINYWVQNGSNDVDILVIYGMGGIGKTTIAKTIYNLNFDSFEGSSFLANIRDASEQPNGLVRLQRQLLSDILSGRKEKIYNVDEGAIKIRDVVSCKRILLVLDDVDQLEQLNAVLGMRDWFHPRSKIILTTRHKHLIKSNDLCKMYEVNELKVDESLQLFSWHAFGQEHPNEGYVEHCKGILQHCGGVP…	1173	4429	https://onlinelibrary.wiley.com/doi/full/10.1111/pbi.13558
PlantKGA_431	Apiales	Araliaceae	Panax	notoginseng	Panax notoginseng		三七	chromosome	Yes	转录本	Pno07G002928t1	Pno07G002928t11288xxPlantKGA_431	Pno07G002928	TN	partial	7	165392385	165396813	+	Pfam	PF01582	TIR domain	Toll/interleukin-1 receptor homology (TIR) domain	18	195	YHVYLSFRGEDTRKTFTDHLYTTLTNAGIRTFRDDDELPRGENIESKLQKAIQESKISIVVFSKNYASSRWCLDELVKILEHKKNSTNHMILPVFYHVVPTQIRHQTGSFADAFSKHVERLKSKNDEKKREGMEKVERWKAALSEVADLSGMELQDGQEAKFIQEIVKEIVKKLKRSV	1.4e-46	MAAASPREASSTTFQYSYHVYLSFRGEDTRKTFTDHLYTTLTNAGIRTFRDDDELPRGENIESKLQKAIQESKISIVVFSKNYASSRWCLDELVKILEHKKNSTNHMILPVFYHVVPTQIRHQTGSFADAFSKHVERLKSKNDEKKREGMEKVERWKAALSEVADLSGMELQDGQEAKFIQEIVKEIVKKLKRSVLRVPDHLIGMKFHVSDINYWVQNGSNDVDILVIYGMGGIGKTTIAKTIYNLNFDSFEGSSFLANIRDASEQPNGLVRLQRQLLSDILSGRKEKIYNVDEGAIKIRDVVSCKRILLVLDDVDQLEQLNAVLGMRDWFHPRSKIILTTRHKHLIKSNDLCKMYEVNELKVDESLQLFSWHAFGQEHPNEGYVEHCKGILQHCGGVP…	1173	4429	https://onlinelibrary.wiley.com/doi/full/10.1111/pbi.13558
PlantKGA_431	Apiales	Araliaceae	Panax	notoginseng	Panax notoginseng		三七	chromosome	Yes	转录本	Pno07G002929t1	Pno07G002929t11288xxPlantKGA_431	Pno07G002929	TN	partial	7	165447552	165452025	+	Pfam	PF01582	TIR domain	Toll/interleukin-1 receptor homology (TIR) domain	18	195	YHVFLSFRGEDTRKTFTDHLYTALTNAGIRTFRDDDELPRGENIESKLQKAIQESKISIVVFSKNYASSRWCLDELVKILEHKKNSTNHMILPVFYHVVPTQIRHQTGNFADAFARHVERLKSMNDEKRREGMEKVERWKATLREVADLSGMELQDGQEAKFIQEIVKEIVKKLKRSV	1.3e-45	MVAVSPREASSTTFEYSYHVFLSFRGEDTRKTFTDHLYTALTNAGIRTFRDDDELPRGENIESKLQKAIQESKISIVVFSKNYASSRWCLDELVKILEHKKNSTNHMILPVFYHVVPTQIRHQTGNFADAFARHVERLKSMNDEKRREGMEKVERWKATLREVADLSGMELQDGQEAKFIQEIVKEIVKKLKRSVLRVPDHLIGMKFHVSDINYWVQNGSNDVDIVVIYGMGGIGKTTIAKTVYNLNFDSFEGSSFLANIRDASEQPNGLVRLQRQLHSDILMGRKEKIYNIEEGAIKIRDVVSCKRILLVLDDVDQLDQLNAVLGMRDWFHPGSKIIITTRHKHLIKSNDVRKMYEVNELNGDESLQLFSWHAFGQEHPNEGYVEHCKGILQHCGGVP…	1160	4474	https://onlinelibrary.wiley.com/doi/full/10.1111/pbi.13558
PlantKGA_431	Apiales	Araliaceae	Panax	notoginseng	Panax notoginseng		三七	chromosome	Yes	转录本	Pno07G002929t1	Pno07G002929t11288xxPlantKGA_431	Pno07G002929	TN	partial	7	165447552	165452025	+	Pfam	PF00931	NB-ARC domain	NB-ARC	216	426	VQNGSNDVDIVVIYGMGGIGKTTIAKTVYNLNFDSFEGSSFLANIRDASEQPNGLVRLQRQLHSDILMGRKEKIYNIEEGAIKIRDVVSCKRILLVLDDVDQLDQLNAVLGMRDWFHPGSKIIITTRHKHLIKSNDVRKMYEVNELNGDESLQLFSWHAFGQEHPNEGYVEHCKGILQHCGGVPLALEVIGSFLFGKDIDIWVSQLEKLER	6.6e-26	MVAVSPREASSTTFEYSYHVFLSFRGEDTRKTFTDHLYTALTNAGIRTFRDDDELPRGENIESKLQKAIQESKISIVVFSKNYASSRWCLDELVKILEHKKNSTNHMILPVFYHVVPTQIRHQTGNFADAFARHVERLKSMNDEKRREGMEKVERWKATLREVADLSGMELQDGQEAKFIQEIVKEIVKKLKRSVLRVPDHLIGMKFHVSDINYWVQNGSNDVDIVVIYGMGGIGKTTIAKTVYNLNFDSFEGSSFLANIRDASEQPNGLVRLQRQLHSDILMGRKEKIYNIEEGAIKIRDVVSCKRILLVLDDVDQLDQLNAVLGMRDWFHPGSKIIITTRHKHLIKSNDVRKMYEVNELNGDESLQLFSWHAFGQEHPNEGYVEHCKGILQHCGGVP…	1160	4474	https://onlinelibrary.wiley.com/doi/full/10.1111/pbi.13558
PlantKGA_431	Apiales	Araliaceae	Panax	notoginseng	Panax notoginseng		三七	chromosome	Yes	转录本	Pno07G002933t1	Pno07G002933t11288xxPlantKGA_431	Pno07G002933	TN	partial	7	165480441	165484772	+	Pfam	PF01582	TIR domain	Toll/interleukin-1 receptor homology (TIR) domain	2	89	ILPVFYHVLPTQIRHQTGSFADAFARHVERLKSKNDEKKREGMEKVERWKAALSEVADLSGMELQDGQEAKFIQEIVKEIVKKLKRSV	4.1e-09	MILPVFYHVLPTQIRHQTGSFADAFARHVERLKSKNDEKKREGMEKVERWKAALSEVADLSGMELQDGQEAKFIQEIVKEIVKKLKRSVLRVPDHLIGMKFHVSDINYWVQNGSNDVDIMVIYGMGGIGKTTIAKNIYNLNFNSFEGSSFLANIRDASEQPNGLVRLQRQLLSDILRGRKEKIYNADEGAIKIRDVVSCKRILLVLDDVDQLDQLNAVLGMRDWFHPGSKIIITTRHKHLIKSNDVCKMYEVNELNGDESLQLFSWHAFGKEHPNEGYVEHCKGILQHCGGVPLALEVIGSFLFGKNIDIWVSQLEKLERVLDGDIVKKLRITFDGLPDNDIKNVFLHVACFFVGEDKDWTINVLDSCDLQTAVAIEHLVGRCLLHIDHYNNKLRMHQL…	879	4332	https://onlinelibrary.wiley.com/doi/full/10.1111/pbi.13558
PlantKGA_431	Apiales	Araliaceae	Panax	notoginseng	Panax notoginseng		三七	chromosome	Yes	转录本	Pno07G002933t1	Pno07G002933t11288xxPlantKGA_431	Pno07G002933	TN	partial	7	165480441	165484772	+	Pfam	PF00931	NB-ARC domain	NB-ARC	110	319	VQNGSNDVDIMVIYGMGGIGKTTIAKNIYNLNFNSFEGSSFLANIRDASEQPNGLVRLQRQLLSDILRGRKEKIYNADEGAIKIRDVVSCKRILLVLDDVDQLDQLNAVLGMRDWFHPGSKIIITTRHKHLIKSNDVCKMYEVNELNGDESLQLFSWHAFGKEHPNEGYVEHCKGILQHCGGVPLALEVIGSFLFGKNIDIWVSQLEKLE	6.2e-28	MILPVFYHVLPTQIRHQTGSFADAFARHVERLKSKNDEKKREGMEKVERWKAALSEVADLSGMELQDGQEAKFIQEIVKEIVKKLKRSVLRVPDHLIGMKFHVSDINYWVQNGSNDVDIMVIYGMGGIGKTTIAKNIYNLNFNSFEGSSFLANIRDASEQPNGLVRLQRQLLSDILRGRKEKIYNADEGAIKIRDVVSCKRILLVLDDVDQLDQLNAVLGMRDWFHPGSKIIITTRHKHLIKSNDVCKMYEVNELNGDESLQLFSWHAFGKEHPNEGYVEHCKGILQHCGGVPLALEVIGSFLFGKNIDIWVSQLEKLERVLDGDIVKKLRITFDGLPDNDIKNVFLHVACFFVGEDKDWTINVLDSCDLQTAVAIEHLVGRCLLHIDHYNNKLRMHQL…	879	4332	https://onlinelibrary.wiley.com/doi/full/10.1111/pbi.13558
PlantKGA_431	Apiales	Araliaceae	Panax	notoginseng	Panax notoginseng		三七	chromosome	Yes	转录本	Pno07G002949t1	Pno07G002949t11288xxPlantKGA_431	Pno07G002949	TN	partial	7	165816495	165820910	+	Pfam	PF01582	TIR domain	Toll/interleukin-1 receptor homology (TIR) domain	18	188	YHVFLSFRGKDTRKTFTDHLYTALTNAGIRTFRDDELPRGENIESKLQKTIQESKISIVVFSKNYASSRWCLDELVKILEHKKNSTNHMILPVFYHVVPTQIRHQTGSFADAFARHVERLKSKNDEKKREGMEKVERWKAALSKVVDLSRMELQDGKEAKFIQEIVKKLKR	8.5e-44	MAVAIPREASSTTFQYSYHVFLSFRGKDTRKTFTDHLYTALTNAGIRTFRDDELPRGENIESKLQKTIQESKISIVVFSKNYASSRWCLDELVKILEHKKNSTNHMILPVFYHVVPTQIRHQTGSFADAFARHVERLKSKNDEKKREGMEKVERWKAALSKVVDLSRMELQDGKEAKFIQEIVKKLKRSVLRVPDHLIGMKFHVSNINYWVQNGSNDVDIMVIYGMGGIGKTTIAKTVYNLNFDSFEGSSFLANIRDASEQPNGLVRLQRQLHSDILRGRKEKIYNVDEGAIKIRDVVSCKRIFLVLDDVDQLDQLNAVLGMRDWFHPGSKIIITTRHKHLIKSNDVHKMYEVNELNGDESIQLFSWHAFGQEHPNEGFVEHCKGILQHCGGVPLALEV…	904	4416	https://onlinelibrary.wiley.com/doi/full/10.1111/pbi.13558
PlantKGA_431	Apiales	Araliaceae	Panax	notoginseng	Panax notoginseng		三七	chromosome	Yes	转录本	Pno07G002949t1	Pno07G002949t11288xxPlantKGA_431	Pno07G002949	TN	partial	7	165816495	165820910	+	Pfam	PF00931	NB-ARC domain	NB-ARC	209	409	YWVQNGSNDVDIMVIYGMGGIGKTTIAKTVYNLNFDSFEGSSFLANIRDASEQPNGLVRLQRQLHSDILRGRKEKIYNVDEGAIKIRDVVSCKRIFLVLDDVDQLDQLNAVLGMRDWFHPGSKIIITTRHKHLIKSNDVHKMYEVNELNGDESIQLFSWHAFGQEHPNEGFVEHCKGILQHCGGVPLALEVIGSFLFGKDI	1.5e-25	MAVAIPREASSTTFQYSYHVFLSFRGKDTRKTFTDHLYTALTNAGIRTFRDDELPRGENIESKLQKTIQESKISIVVFSKNYASSRWCLDELVKILEHKKNSTNHMILPVFYHVVPTQIRHQTGSFADAFARHVERLKSKNDEKKREGMEKVERWKAALSKVVDLSRMELQDGKEAKFIQEIVKKLKRSVLRVPDHLIGMKFHVSNINYWVQNGSNDVDIMVIYGMGGIGKTTIAKTVYNLNFDSFEGSSFLANIRDASEQPNGLVRLQRQLHSDILRGRKEKIYNVDEGAIKIRDVVSCKRIFLVLDDVDQLDQLNAVLGMRDWFHPGSKIIITTRHKHLIKSNDVHKMYEVNELNGDESIQLFSWHAFGQEHPNEGFVEHCKGILQHCGGVPLALEV…	904	4416	https://onlinelibrary.wiley.com/doi/full/10.1111/pbi.13558
PlantKGA_431	Apiales	Araliaceae	Panax	notoginseng	Panax notoginseng		三七	chromosome	Yes	转录本	Pno07G002952t1	Pno07G002952t11288xxPlantKGA_431	Pno07G002952	TN	partial	7	165829764	165835674	+	Pfam	PF01582	TIR domain	Toll/interleukin-1 receptor homology (TIR) domain	18	195	YHVFLSFRGEDTRNTFTDHLYTALTNAGIRTFRDDDELPRGENIESKLQKAIQESKISIVVFSTNYASSRWCLDELVKILEHKKNSTNHIILPVFYHVVPTQIRYQTGSFADAFARHVERLKSKNDEKKRDGMEKVERWKAALSEVANLSGMELQDGQEAKFIQNIVKEIVKKLKRSV	1.3e-45	MAAASPREASSTTFQYSYHVFLSFRGEDTRNTFTDHLYTALTNAGIRTFRDDDELPRGENIESKLQKAIQESKISIVVFSTNYASSRWCLDELVKILEHKKNSTNHIILPVFYHVVPTQIRYQTGSFADAFARHVERLKSKNDEKKRDGMEKVERWKAALSEVANLSGMELQDGQEAKFIQNIVKEIVKKLKRSVLRVPDHLIGMKFHVSDINYWVQNGSNDVDIMVIYGMGGIGKTTIAKTIYNLNFDSFEGSSFLANIRDVSEQPNGLVRLQRQLLSDILRGGKEKIYNVDEGAIKIRDVVSCKRILLVLDDVDQLDQLNSVLGMRDWFHLGSKIIITTRHKHLIKSNDVCKMYQVNQLNGEESLQLFSWHAFGQEHPNEGYVEHCKGILQHCGGVP…	1175	5911	https://onlinelibrary.wiley.com/doi/full/10.1111/pbi.13558
PlantKGA_431	Apiales	Araliaceae	Panax	notoginseng	Panax notoginseng		三七	chromosome	Yes	转录本	Pno07G002952t1	Pno07G002952t11288xxPlantKGA_431	Pno07G002952	TN	partial	7	165829764	165835674	+	Pfam	PF00931	NB-ARC domain	NB-ARC	216	417	VQNGSNDVDIMVIYGMGGIGKTTIAKTIYNLNFDSFEGSSFLANIRDVSEQPNGLVRLQRQLLSDILRGGKEKIYNVDEGAIKIRDVVSCKRILLVLDDVDQLDQLNSVLGMRDWFHLGSKIIITTRHKHLIKSNDVCKMYQVNQLNGEESLQLFSWHAFGQEHPNEGYVEHCKGILQHCGGVPLALEIIGSFLFGKDKDIW	9.8e-28	MAAASPREASSTTFQYSYHVFLSFRGEDTRNTFTDHLYTALTNAGIRTFRDDDELPRGENIESKLQKAIQESKISIVVFSTNYASSRWCLDELVKILEHKKNSTNHIILPVFYHVVPTQIRYQTGSFADAFARHVERLKSKNDEKKRDGMEKVERWKAALSEVANLSGMELQDGQEAKFIQNIVKEIVKKLKRSVLRVPDHLIGMKFHVSDINYWVQNGSNDVDIMVIYGMGGIGKTTIAKTIYNLNFDSFEGSSFLANIRDVSEQPNGLVRLQRQLLSDILRGGKEKIYNVDEGAIKIRDVVSCKRILLVLDDVDQLDQLNSVLGMRDWFHLGSKIIITTRHKHLIKSNDVCKMYQVNQLNGEESLQLFSWHAFGQEHPNEGYVEHCKGILQHCGGVP…	1175	5911	https://onlinelibrary.wiley.com/doi/full/10.1111/pbi.13558
PlantKGA_431	Apiales	Araliaceae	Panax	notoginseng	Panax notoginseng		三七	chromosome	Yes	转录本	Pno07G002953t1	Pno07G002953t11288xxPlantKGA_431	Pno07G002953	TN	partial	7	165870034	165874395	+	Pfam	PF01582	TIR domain	Toll/interleukin-1 receptor homology (TIR) domain	18	195	YHVFLSFRGEDTRKTFTDHLYTALTNAGIRTFRDDDELPRGENIESKLQQAIQESKISIVVFSTNYASSRWCLDELVKILEHKKNSTNHMILPVFYHVVPAQIRHQTGSFANAFARHVERLNSKNDEKKREGMEKVERWKAALSEVANLSGMELQDGQEAKFIQNIVKEIVKKLKRSV	1.3e-45	MTATSPREASSTTFQYSYHVFLSFRGEDTRKTFTDHLYTALTNAGIRTFRDDDELPRGENIESKLQQAIQESKISIVVFSTNYASSRWCLDELVKILEHKKNSTNHMILPVFYHVVPAQIRHQTGSFANAFARHVERLNSKNDEKKREGMEKVERWKAALSEVANLSGMELQDGQEAKFIQNIVKEIVKKLKRSVLRVPDHLIGMKFHVSNINYWVQNGSNDVDILVIYGMGGIGKTTIAKTIYNLNFDSFEGSSFLANIKDVSEQPNGLVRLQKQLLSDILRGRKEKIYNVDEGAIKIRDVVSCKRILLVLDDVDQLNQLNAVLGMRDWFHPGSKIILTTRHKHLIKSNDVCKMYEVTELNDDESLQLFSWHAFGQEQPNEGYVEHYKGILQHCGGVP…	1176	4362	https://onlinelibrary.wiley.com/doi/full/10.1111/pbi.13558
PlantKGA_431	Apiales	Araliaceae	Panax	notoginseng	Panax notoginseng		三七	chromosome	Yes	转录本	Pno07G002953t1	Pno07G002953t11288xxPlantKGA_431	Pno07G002953	TN	partial	7	165870034	165874395	+	Pfam	PF00931	NB-ARC domain	NB-ARC	214	425	YWVQNGSNDVDILVIYGMGGIGKTTIAKTIYNLNFDSFEGSSFLANIKDVSEQPNGLVRLQKQLLSDILRGRKEKIYNVDEGAIKIRDVVSCKRILLVLDDVDQLNQLNAVLGMRDWFHPGSKIILTTRHKHLIKSNDVCKMYEVTELNDDESLQLFSWHAFGQEQPNEGYVEHYKGILQHCGGVPLALEVIGSFLFGKDIDIWVSQLEKLE	1.7e-28	MTATSPREASSTTFQYSYHVFLSFRGEDTRKTFTDHLYTALTNAGIRTFRDDDELPRGENIESKLQQAIQESKISIVVFSTNYASSRWCLDELVKILEHKKNSTNHMILPVFYHVVPAQIRHQTGSFANAFARHVERLNSKNDEKKREGMEKVERWKAALSEVANLSGMELQDGQEAKFIQNIVKEIVKKLKRSVLRVPDHLIGMKFHVSNINYWVQNGSNDVDILVIYGMGGIGKTTIAKTIYNLNFDSFEGSSFLANIKDVSEQPNGLVRLQKQLLSDILRGRKEKIYNVDEGAIKIRDVVSCKRILLVLDDVDQLNQLNAVLGMRDWFHPGSKIILTTRHKHLIKSNDVCKMYEVTELNDDESLQLFSWHAFGQEQPNEGYVEHYKGILQHCGGVP…	1176	4362	https://onlinelibrary.wiley.com/doi/full/10.1111/pbi.13558
PlantKGA_431	Apiales	Araliaceae	Panax	notoginseng	Panax notoginseng		三七	chromosome	Yes	转录本	Pno07G002959t1	Pno07G002959t11288xxPlantKGA_431	Pno07G002959	TN	partial	7	165943375	165948005	+	Pfam	PF00931	NB-ARC domain	NB-ARC	174	363	NGSNDVDIMVIYGMGGIGSSFLANIRDASEQPNGLVRLQRQLLSDILKGRKEKIYNVDEGAIKIRDVVSCKRILLVLDDVDQLDQLNAVLGMRDWFHPGSKIIITTRHKHLIKSNDVRKMYEVNELNGDESLQLLSWHAFGQEHPNEGYVEHCKGILQHCGGVPLALEVIGSFLFGKDIDIWVSQLEKLE	6.5e-18	MADASPREASSTTFQYSYHVFLSFRGKDTRKTFTDHLYTALTNAGIRTFRDDDELPRGENIESKLRKAIQEAKISIVASNREFCRCICQHVEKLKSKNDEKKREGMEKVERWKAALSDVADLSGMELQDGQEAKFIQEIVKEIVKKLKSSVLRVPDHLIGMKFHVSDINYWVQNGSNDVDIMVIYGMGGIGSSFLANIRDASEQPNGLVRLQRQLLSDILKGRKEKIYNVDEGAIKIRDVVSCKRILLVLDDVDQLDQLNAVLGMRDWFHPGSKIIITTRHKHLIKSNDVRKMYEVNELNGDESLQLLSWHAFGQEHPNEGYVEHCKGILQHCGGVPLALEVIGSFLFGKDIDIWVSQLEKLERVGDGNIIRKLKITFDGLPDNDTKNVFLHVTCFFVG…	983	4631	https://onlinelibrary.wiley.com/doi/full/10.1111/pbi.13558
PlantKGA_431	Apiales	Araliaceae	Panax	notoginseng	Panax notoginseng		三七	chromosome	Yes	转录本	Pno07G002959t1	Pno07G002959t11288xxPlantKGA_431	Pno07G002959	TN	partial	7	165943375	165948005	+	Pfam	PF01582	TIR domain	Toll/interleukin-1 receptor homology (TIR) domain	18	77	YHVFLSFRGKDTRKTFTDHLYTALTNAGIRTFRDDDELPRGENIESKLRKAIQEAKISIV	2.2e-13	MADASPREASSTTFQYSYHVFLSFRGKDTRKTFTDHLYTALTNAGIRTFRDDDELPRGENIESKLRKAIQEAKISIVASNREFCRCICQHVEKLKSKNDEKKREGMEKVERWKAALSDVADLSGMELQDGQEAKFIQEIVKEIVKKLKSSVLRVPDHLIGMKFHVSDINYWVQNGSNDVDIMVIYGMGGIGSSFLANIRDASEQPNGLVRLQRQLLSDILKGRKEKIYNVDEGAIKIRDVVSCKRILLVLDDVDQLDQLNAVLGMRDWFHPGSKIIITTRHKHLIKSNDVRKMYEVNELNGDESLQLLSWHAFGQEHPNEGYVEHCKGILQHCGGVPLALEVIGSFLFGKDIDIWVSQLEKLERVGDGNIIRKLKITFDGLPDNDTKNVFLHVTCFFVG…	983	4631	https://onlinelibrary.wiley.com/doi/full/10.1111/pbi.13558
PlantKGA_431	Apiales	Araliaceae	Panax	notoginseng	Panax notoginseng		三七	chromosome	Yes	转录本	Pno07G003049t1	Pno07G003049t11288xxPlantKGA_431	Pno07G003049	TN	partial	7	167466045	167469538	-	Pfam	PF00931	NB-ARC domain	NB-ARC	226	332	GTKIIITTRHKGLLKSHEVCKRYKVEVLNNDESLELFSWHAFGQDFPSEGYMELSQGVLKHCGGLSLALQVLGSSLSGKSSDIWESALKKLEAIPNDQILKKLKISY	3.4e-12	MAAVRPQEASSSTFRCSYHVFLSFRGKDTRETFTDHLYTALVHAGIHTFRDEDELQRGENIESELKNLRFVFSTNYATSRWCLDELLKIVECQKISVHTILPVFYHVLPTQVRFQTRSFAEAFVRHVERLKSKTDVQKREGMERVEKWKAALREVADLRRMVLQVGHEAKFIVKEFGIKLNRTILSVAPHPIGIDSRVSAINWWVQDRWMGLLNAVLGMRDWFYPGTKIIITTRHKGLLKSHEVCKRYKVEVLNNDESLELFSWHAFGQDFPSEGYMELSQGVLKHCGGLSLALQVLGSSLSGKSSDIWESALKKLEAIPNDQILKKLKISYDSLQDDHDKSLFLDIACFFVGRDKDYIPTILDACDVYTDIGIQNLTDRCLLTIDGKNKLMMHQLLRD…	532	3494	https://onlinelibrary.wiley.com/doi/full/10.1111/pbi.13558
PlantKGA_431	Apiales	Araliaceae	Panax	notoginseng	Panax notoginseng		三七	chromosome	Yes	转录本	Pno07G003049t1	Pno07G003049t11288xxPlantKGA_431	Pno07G003049	TN	partial	7	167466045	167469538	-	Pfam	PF01582	TIR domain	Toll/interleukin-1 receptor homology (TIR) domain	18	172	YHVFLSFRGKDTRETFTDHLYTALVHAGIHTFRDEDELQRGENIESELKNLRFVFSTNYATSRWCLDELLKIVECQKISVHTILPVFYHVLPTQVRFQTRSFAEAFVRHVERLKSKTDVQKREGMERVEKWKAALREVADLRRMVLQVGHEAKFI	3.9e-29	MAAVRPQEASSSTFRCSYHVFLSFRGKDTRETFTDHLYTALVHAGIHTFRDEDELQRGENIESELKNLRFVFSTNYATSRWCLDELLKIVECQKISVHTILPVFYHVLPTQVRFQTRSFAEAFVRHVERLKSKTDVQKREGMERVEKWKAALREVADLRRMVLQVGHEAKFIVKEFGIKLNRTILSVAPHPIGIDSRVSAINWWVQDRWMGLLNAVLGMRDWFYPGTKIIITTRHKGLLKSHEVCKRYKVEVLNNDESLELFSWHAFGQDFPSEGYMELSQGVLKHCGGLSLALQVLGSSLSGKSSDIWESALKKLEAIPNDQILKKLKISYDSLQDDHDKSLFLDIACFFVGRDKDYIPTILDACDVYTDIGIQNLTDRCLLTIDGKNKLMMHQLLRD…	532	3494	https://onlinelibrary.wiley.com/doi/full/10.1111/pbi.13558
PlantKGA_431	Apiales	Araliaceae	Panax	notoginseng	Panax notoginseng		三七	chromosome	Yes	转录本	Pno07G003125t1	Pno07G003125t11288xxPlantKGA_431	Pno07G003125	TN	partial	7	168537038	168542799	-	Pfam	PF01582	TIR domain	Toll/interleukin-1 receptor homology (TIR) domain	30	199	SVFLSFRGKDTRNNFSGHLYMALKQTGILTFMDDPELRRGDEISTQLLQAIKESKVSIVVFSKEYASSRWCLDELVEILECKRTNKQLVLPVFYDVEPLVVRHQTGSFATAFESHAKRYATNLDKVEKWKIALTQASNLSGYDLKNEANGDEAKLIKQIIEETAKKLNQE	2.7e-45	MASTSNQIHDSSSSSSSSSSISSSTPPCWSVFLSFRGKDTRNNFSGHLYMALKQTGILTFMDDPELRRGDEISTQLLQAIKESKVSIVVFSKEYASSRWCLDELVEILECKRTNKQLVLPVFYDVEPLVVRHQTGSFATAFESHAKRYATNLDKVEKWKIALTQASNLSGYDLKNEANGDEAKLIKQIIEETAKKLNQEFLHVARYPVGIESRVEKFNKLLSLEKTNDVRIAAIWGVGGIGKTTAAKAVYNRISSHFEDRCFLADIAQTSRQPNGVVTLQNQLISNVLKNDRLKVDNCHQGIEVIKCQIWRRKKLLIVLDDVDNVEQLEHLGIDRDLLQAGSRIIVTTRDLSCLSLLGVDDVHTPEELNKRESLELFSCYAFGQDHPKEGYEEISEEVV…	1085	5762	https://onlinelibrary.wiley.com/doi/full/10.1111/pbi.13558
PlantKGA_431	Apiales	Araliaceae	Panax	notoginseng	Panax notoginseng		三七	chromosome	Yes	转录本	Pno07G003125t1	Pno07G003125t11288xxPlantKGA_431	Pno07G003125	TN	partial	7	168537038	168542799	-	Pfam	PF00931	NB-ARC domain	NB-ARC	211	452	ESRVEKFNKLLSLEKTNDVRIAAIWGVGGIGKTTAAKAVYNRISSHFEDRCFLADIAQTSRQPNGVVTLQNQLISNVLKNDRLKVDNCHQGIEVIKCQIWRRKKLLIVLDDVDNVEQLEHLGIDRDLLQAGSRIIVTTRDLSCLSLLGVDDVHTPEELNKRESLELFSCYAFGQDHPKEGYEEISEEVVDCAGGLPLVLAIWGPYMRSFKSIVHWQSALKKLKKIPHNDVQAKLKVSFDSLD	2.2e-28	MASTSNQIHDSSSSSSSSSSISSSTPPCWSVFLSFRGKDTRNNFSGHLYMALKQTGILTFMDDPELRRGDEISTQLLQAIKESKVSIVVFSKEYASSRWCLDELVEILECKRTNKQLVLPVFYDVEPLVVRHQTGSFATAFESHAKRYATNLDKVEKWKIALTQASNLSGYDLKNEANGDEAKLIKQIIEETAKKLNQEFLHVARYPVGIESRVEKFNKLLSLEKTNDVRIAAIWGVGGIGKTTAAKAVYNRISSHFEDRCFLADIAQTSRQPNGVVTLQNQLISNVLKNDRLKVDNCHQGIEVIKCQIWRRKKLLIVLDDVDNVEQLEHLGIDRDLLQAGSRIIVTTRDLSCLSLLGVDDVHTPEELNKRESLELFSCYAFGQDHPKEGYEEISEEVV…	1085	5762	https://onlinelibrary.wiley.com/doi/full/10.1111/pbi.13558
PlantKGA_431	Apiales	Araliaceae	Panax	notoginseng	Panax notoginseng		三七	chromosome	Yes	转录本	Pno07G013564t1	Pno07G013564t11288xxPlantKGA_431	Pno07G013564	TN	partial	7	7589225	7594850	-	Pfam	PF01582	TIR domain	Toll/interleukin-1 receptor homology (TIR) domain	21	188	YDVFVSFRGKDIRKSFMDHLFTDFKRKGIFPFRDDKQLKIGGEISPGLDYAIRKSRILVVMFSKNYASSTWCLDELVQILECKEMEKDKYEVRAIFYDVDPTVVRNHTDSYEVALNKHEAKRKKGVPEWKEALVKAADLPAWDLQDMADGFESKFVDIISKEIFQILS	5.9e-37	MALSSLSSSTSSSIADHRWIYDVFVSFRGKDIRKSFMDHLFTDFKRKGIFPFRDDKQLKIGGEISPGLDYAIRKSRILVVMFSKNYASSTWCLDELVQILECKEMEKDKYEVRAIFYDVDPTVVRNHTDSYEVALNKHEAKRKKGVPEWKEALVKAADLPAWDLQDMADGFESKFVDIISKEIFQILSHGPLDVGENLVGLHSRVEQMNLLRFVKPLDQNKAHMIGICGISGVGKTTIARSIYNLLHIHFEGCSFCEDVKGVAKMHGLPHVQKQLLDDITKAGDLKIHSVGRGISVIKQRMSSKQVLIILDDVNHRDQFKALAGSPDWFGPGSLIIVTGKDRQLQTAHGIEEIFEVDLLDQDESTELFSLYAFKQKNPKQEFKELSENVVHYVNGHPLA…	1111	5626	https://onlinelibrary.wiley.com/doi/full/10.1111/pbi.13558
PlantKGA_431	Apiales	Araliaceae	Panax	notoginseng	Panax notoginseng		三七	chromosome	Yes	转录本	Pno07G013564t1	Pno07G013564t11288xxPlantKGA_431	Pno07G013564	TN	partial	7	7589225	7594850	-	Pfam	PF00931	NB-ARC domain	NB-ARC	218	426	DQNKAHMIGICGISGVGKTTIARSIYNLLHIHFEGCSFCEDVKGVAKMHGLPHVQKQLLDDITKAGDLKIHSVGRGISVIKQRMSSKQVLIILDDVNHRDQFKALAGSPDWFGPGSLIIVTGKDRQLQTAHGIEEIFEVDLLDQDESTELFSLYAFKQKNPKQEFKELSENVVHYVNGHPLALKVLGCFLFRKTVKEWESELVKLKSYP	9.9e-27	MALSSLSSSTSSSIADHRWIYDVFVSFRGKDIRKSFMDHLFTDFKRKGIFPFRDDKQLKIGGEISPGLDYAIRKSRILVVMFSKNYASSTWCLDELVQILECKEMEKDKYEVRAIFYDVDPTVVRNHTDSYEVALNKHEAKRKKGVPEWKEALVKAADLPAWDLQDMADGFESKFVDIISKEIFQILSHGPLDVGENLVGLHSRVEQMNLLRFVKPLDQNKAHMIGICGISGVGKTTIARSIYNLLHIHFEGCSFCEDVKGVAKMHGLPHVQKQLLDDITKAGDLKIHSVGRGISVIKQRMSSKQVLIILDDVNHRDQFKALAGSPDWFGPGSLIIVTGKDRQLQTAHGIEEIFEVDLLDQDESTELFSLYAFKQKNPKQEFKELSENVVHYVNGHPLA…	1111	5626	https://onlinelibrary.wiley.com/doi/full/10.1111/pbi.13558
PlantKGA_431	Apiales	Araliaceae	Panax	notoginseng	Panax notoginseng		三七	chromosome	Yes	转录本	Pno07G013576t1	Pno07G013576t11288xxPlantKGA_431	Pno07G013576	TN	partial	7	7598807	7603574	-	Pfam	PF01582	TIR domain	Toll/interleukin-1 receptor homology (TIR) domain	12	186	KYDVFVSFKDEDIGKGFMDHLFSDFKRKGIHAFREDDHIKKGEEITSQIYEAIEKSRILVVIFSQNYASSTKCLSELKKILECKEKEKEEKKDQYEIWPIFYDVKPYMVRYQAGSFEAAFKEHEASKKKEVPEWKEALAKAADLSGLELQDKANGFESNFIDIISKKIFEILSHG	1.8e-37	MASSCMSTHRWKYDVFVSFKDEDIGKGFMDHLFSDFKRKGIHAFREDDHIKKGEEITSQIYEAIEKSRILVVIFSQNYASSTKCLSELKKILECKEKEKEEKKDQYEIWPIFYDVKPYMVRYQAGSFEAAFKEHEASKKKEVPEWKEALAKAADLSGLELQDKANGFESNFIDIISKKIFEILSHGPLEIAENLVGLHSHAEQMNLLRFVGSSDTRVIGIWGIGGVGKSTFARAIFNLLYIHFEGCSFCEDVRRVVEIHGRPHLQKQLLEDITGAGDIKIHCVAQGISVIKQQMRSKRVLVVLDGVDDRNQLEAVAGMREWFCPGSLIIVTGRDRQLLNAHGVEEIYKVDVLKNDEAFKLFSLYAFQQKQPEEVFERLARDVVQYAKGHPQTLEVLGCF…	1055	4768	https://onlinelibrary.wiley.com/doi/full/10.1111/pbi.13558
PlantKGA_431	Apiales	Araliaceae	Panax	notoginseng	Panax notoginseng		三七	chromosome	Yes	转录本	Pno07G013576t1	Pno07G013576t11288xxPlantKGA_431	Pno07G013576	TN	partial	7	7598807	7603574	-	Pfam	PF00931	NB-ARC domain	NB-ARC	211	434	GSSDTRVIGIWGIGGVGKSTFARAIFNLLYIHFEGCSFCEDVRRVVEIHGRPHLQKQLLEDITGAGDIKIHCVAQGISVIKQQMRSKRVLVVLDGVDDRNQLEAVAGMREWFCPGSLIIVTGRDRQLLNAHGVEEIYKVDVLKNDEAFKLFSLYAFQQKQPEEVFERLARDVVQYAKGHPQTLEVLGCFLFNKTVCEWRSELNKLRRIPNAEIQEVFRLSYDGL	3.2e-28	MASSCMSTHRWKYDVFVSFKDEDIGKGFMDHLFSDFKRKGIHAFREDDHIKKGEEITSQIYEAIEKSRILVVIFSQNYASSTKCLSELKKILECKEKEKEEKKDQYEIWPIFYDVKPYMVRYQAGSFEAAFKEHEASKKKEVPEWKEALAKAADLSGLELQDKANGFESNFIDIISKKIFEILSHGPLEIAENLVGLHSHAEQMNLLRFVGSSDTRVIGIWGIGGVGKSTFARAIFNLLYIHFEGCSFCEDVRRVVEIHGRPHLQKQLLEDITGAGDIKIHCVAQGISVIKQQMRSKRVLVVLDGVDDRNQLEAVAGMREWFCPGSLIIVTGRDRQLLNAHGVEEIYKVDVLKNDEAFKLFSLYAFQQKQPEEVFERLARDVVQYAKGHPQTLEVLGCF…	1055	4768	https://onlinelibrary.wiley.com/doi/full/10.1111/pbi.13558
PlantKGA_431	Apiales	Araliaceae	Panax	notoginseng	Panax notoginseng		三七	chromosome	Yes	转录本	Pno08G001465t1	Pno08G001465t11288xxPlantKGA_431	Pno08G001465	TN	partial	8	132054644	132073578	+	Pfam	PF01582	TIR domain	Toll/interleukin-1 receptor homology (TIR) domain	20	180	NVFLSFRGADTRGNFTGHLYKALDQAGIQTFMDDSELPRGEEISPALLKAIQESDISIVVISKNYASSTWCLNELMKILECRKTMGQLVLPVFYKVNPSDVRYQCGRFAEAFDKHKIRFLSDMNKVEKWRATLTEAAQLSGYHVDANGNEPNLIDQIVDRV	8.2e-45	MASTSNQIGSSSSSFTPRWNVFLSFRGADTRGNFTGHLYKALDQAGIQTFMDDSELPRGEEISPALLKAIQESDISIVVISKNYASSTWCLNELMKILECRKTMGQLVLPVFYKVNPSDVRYQCGRFAEAFDKHKIRFLSDMNKVEKWRATLTEAAQLSGYHVDANGNEPNLIDQIVDRVQIEVNPRYLNVAKKPVGIASHVENIMPLLSIGTNGVRKIGIYGMGGVGKTTVAKAVYNEHFRSFQGNCFLANVREVSGQLNGIVKLQKLLLSEVLKSEKFTITNVDNGISFIEKKIQKRVLIVLDDLDHRNQLDSLAGQWNRFASGSIIMITTRDERLLDQIKVDGRYEVEELNNNDSLELFSLHAFGKTIPPSDDFMELSQKIIGYAGGLPLALEVFG…	1235	18935	https://onlinelibrary.wiley.com/doi/full/10.1111/pbi.13558
PlantKGA_431	Apiales	Araliaceae	Panax	notoginseng	Panax notoginseng		三七	chromosome	Yes	转录本	Pno08G001465t1	Pno08G001465t11288xxPlantKGA_431	Pno08G001465	TN	partial	8	132054644	132073578	+	Pfam	PF00931	NB-ARC domain	NB-ARC	201	428	HVENIMPLLSIGTNGVRKIGIYGMGGVGKTTVAKAVYNEHFRSFQGNCFLANVREVSGQLNGIVKLQKLLLSEVLKSEKFTITNVDNGISFIEKKIQKRVLIVLDDLDHRNQLDSLAGQWNRFASGSIIMITTRDERLLDQIKVDGRYEVEELNNNDSLELFSLHAFGKTIPPSDDFMELSQKIIGYAGGLPLALEVFGSNLFNQDELEWTSFIKKLRENSNSEIEGK	4e-27	MASTSNQIGSSSSSFTPRWNVFLSFRGADTRGNFTGHLYKALDQAGIQTFMDDSELPRGEEISPALLKAIQESDISIVVISKNYASSTWCLNELMKILECRKTMGQLVLPVFYKVNPSDVRYQCGRFAEAFDKHKIRFLSDMNKVEKWRATLTEAAQLSGYHVDANGNEPNLIDQIVDRVQIEVNPRYLNVAKKPVGIASHVENIMPLLSIGTNGVRKIGIYGMGGVGKTTVAKAVYNEHFRSFQGNCFLANVREVSGQLNGIVKLQKLLLSEVLKSEKFTITNVDNGISFIEKKIQKRVLIVLDDLDHRNQLDSLAGQWNRFASGSIIMITTRDERLLDQIKVDGRYEVEELNNNDSLELFSLHAFGKTIPPSDDFMELSQKIIGYAGGLPLALEVFG…	1235	18935	https://onlinelibrary.wiley.com/doi/full/10.1111/pbi.13558
PlantKGA_431	Apiales	Araliaceae	Panax	notoginseng	Panax notoginseng		三七	chromosome	Yes	转录本	Pno08G001493t1	Pno08G001493t11288xxPlantKGA_431	Pno08G001493	TN	partial	8	132854383	132917259	+	Pfam	PF01582	TIR domain	Toll/interleukin-1 receptor homology (TIR) domain	26	188	NVFLSFRGEDTRGNFTGHLYKALDRVGIQTFMDDPELPRGEEISPALLRAIQESKISIVVISKNYASSTWCLNELMKILECRKTMRQLVLPVFYKVNPSDVRYQFGSFSEAFEKHRIRFVGDMDKVEKWRAALSEAAQLSGYHLDANGNEPDLIDQIVDRVHD	1.1e-44	MASSNNQNDSSYYYDPSSSSFTPRWNVFLSFRGEDTRGNFTGHLYKALDRVGIQTFMDDPELPRGEEISPALLRAIQESKISIVVISKNYASSTWCLNELMKILECRKTMRQLVLPVFYKVNPSDVRYQFGSFSEAFEKHRIRFVGDMDKVEKWRAALSEAAQLSGYHLDANGNEPDLIDQIVDRVHDEVNPRYLNVAKKPVGIASHVENITPLLSIGTNGVRKIGIYGMGGVGKTTVAKAVYNENFRSFQGSCFLADVREISGQPNGTVRLQELLVSEVLKSKKFNITNVHNGISFIEEKTRSKRVLIVLDDLDHRNQLDSLAGQWNQFASGSIIIITTRDARLLDQIQVDGRYEVEELNNNDSLELFSLHAFEKTIPPSDDFMKLSQKILSYAGGLP…	1073	62877	https://onlinelibrary.wiley.com/doi/full/10.1111/pbi.13558
PlantKGA_431	Apiales	Araliaceae	Panax	notoginseng	Panax notoginseng		三七	chromosome	Yes	转录本	Pno08G001493t1	Pno08G001493t11288xxPlantKGA_431	Pno08G001493	TN	partial	8	132854383	132917259	+	Pfam	PF00931	NB-ARC domain	NB-ARC	207	434	HVENITPLLSIGTNGVRKIGIYGMGGVGKTTVAKAVYNENFRSFQGSCFLADVREISGQPNGTVRLQELLVSEVLKSKKFNITNVHNGISFIEEKTRSKRVLIVLDDLDHRNQLDSLAGQWNQFASGSIIIITTRDARLLDQIQVDGRYEVEELNNNDSLELFSLHAFEKTIPPSDDFMKLSQKILSYAGGLPLALEVFGSNLFNQDELEWTSFIKKLRENPNSDIEG	3.6e-26	MASSNNQNDSSYYYDPSSSSFTPRWNVFLSFRGEDTRGNFTGHLYKALDRVGIQTFMDDPELPRGEEISPALLRAIQESKISIVVISKNYASSTWCLNELMKILECRKTMRQLVLPVFYKVNPSDVRYQFGSFSEAFEKHRIRFVGDMDKVEKWRAALSEAAQLSGYHLDANGNEPDLIDQIVDRVHDEVNPRYLNVAKKPVGIASHVENITPLLSIGTNGVRKIGIYGMGGVGKTTVAKAVYNENFRSFQGSCFLADVREISGQPNGTVRLQELLVSEVLKSKKFNITNVHNGISFIEEKTRSKRVLIVLDDLDHRNQLDSLAGQWNQFASGSIIIITTRDARLLDQIQVDGRYEVEELNNNDSLELFSLHAFEKTIPPSDDFMKLSQKILSYAGGLP…	1073	62877	https://onlinelibrary.wiley.com/doi/full/10.1111/pbi.13558
PlantKGA_431	Apiales	Araliaceae	Panax	notoginseng	Panax notoginseng		三七	chromosome	Yes	转录本	Pno08G004300t1	Pno08G004300t11288xxPlantKGA_431	Pno08G004300	TN	partial	8	31230537	31234614	+	Pfam	PF00931	NB-ARC domain	NB-ARC	205	421	LKMLLSNRSDSVCMIGIYGMGGVGKTTTAKAVYNMILQHYECSCFLENVREVSEQLGGLAHLQEKLLSSILMIEKLKVDSVDRGISLMRERLCSKRVLIVLDDLDKLSQVKSLVGGRDWFGSGSTIIITTRDEHLLDLIQVDNKYEAEKLNFTESLELFSWHAFRTNIPLEDYAGLSNSIVSYCGGLPLALEVLGSYLYGRNTVQWEDAFEKLKQIP	2.7e-25	MAATSYQASSSCFPSSSSTAHDVFLSFRGEDTRKTFTSHLYTALTQAGIRTFLDDSELQRGTDISSELLTAIEQSRVSIIVFSKNYASSRWCLDELAKILECKKTFGQLVLPIFYDVDPSDVRHQTGSFANAFAIHRGLEKVEIWRAALTQVATISGWDLKNVANGHESKFILKIVKEVMRVIKNYTYLDVCTHPVGMDSRAEDLKMLLSNRSDSVCMIGIYGMGGVGKTTTAKAVYNMILQHYECSCFLENVREVSEQLGGLAHLQEKLLSSILMIEKLKVDSVDRGISLMRERLCSKRVLIVLDDLDKLSQVKSLVGGRDWFGSGSTIIITTRDEHLLDLIQVDNKYEAEKLNFTESLELFSWHAFRTNIPLEDYAGLSNSIVSYCGGLPLALEVLG…	1002	4078	https://onlinelibrary.wiley.com/doi/full/10.1111/pbi.13558
PlantKGA_431	Apiales	Araliaceae	Panax	notoginseng	Panax notoginseng		三七	chromosome	Yes	转录本	Pno08G004300t1	Pno08G004300t11288xxPlantKGA_431	Pno08G004300	TN	partial	8	31230537	31234614	+	Pfam	PF01582	TIR domain	Toll/interleukin-1 receptor homology (TIR) domain	20	181	AHDVFLSFRGEDTRKTFTSHLYTALTQAGIRTFLDDSELQRGTDISSELLTAIEQSRVSIIVFSKNYASSRWCLDELAKILECKKTFGQLVLPIFYDVDPSDVRHQTGSFANAFAIHRGLEKVEIWRAALTQVATISGWDLKNVANGHESKFILKIVKEVMR	6.5e-50	MAATSYQASSSCFPSSSSTAHDVFLSFRGEDTRKTFTSHLYTALTQAGIRTFLDDSELQRGTDISSELLTAIEQSRVSIIVFSKNYASSRWCLDELAKILECKKTFGQLVLPIFYDVDPSDVRHQTGSFANAFAIHRGLEKVEIWRAALTQVATISGWDLKNVANGHESKFILKIVKEVMRVIKNYTYLDVCTHPVGMDSRAEDLKMLLSNRSDSVCMIGIYGMGGVGKTTTAKAVYNMILQHYECSCFLENVREVSEQLGGLAHLQEKLLSSILMIEKLKVDSVDRGISLMRERLCSKRVLIVLDDLDKLSQVKSLVGGRDWFGSGSTIIITTRDEHLLDLIQVDNKYEAEKLNFTESLELFSWHAFRTNIPLEDYAGLSNSIVSYCGGLPLALEVLG…	1002	4078	https://onlinelibrary.wiley.com/doi/full/10.1111/pbi.13558
PlantKGA_431	Apiales	Araliaceae	Panax	notoginseng	Panax notoginseng		三七	chromosome	Yes	转录本	Pno08G004303t3	Pno08G004303t31288xxPlantKGA_431	Pno08G004303	TN	partial	8	31258994	31263444	-	Pfam	PF00931	NB-ARC domain	NB-ARC	205	421	LKMLLSNRSDSVCMIGIYGMGGVGKTTTAKAVYNMILQHYECSCFLENVREVSEQLGGLAHLQEKLLSSILMIEKLKVDSVDRGISLMRERLCSKRVLIVLDDLDKLSQVKSLVGGRDWFGSGSTIIITTRDEHLLDLIQVDNKYEAEKLNFTESLELFSWHAFRTNIPLEDYAGLSNSIVSYCGGLPLALEVLGSYLYGRNTVQWEDAFEKLKQIP	3.5e-25	MAATSYQASSSCFPSSSSTAHDVFLSFRGEDTRKTFTSHLYTALTQAGIRTFLDDSELQRGTDISSELLTAIEQSRVSIIVFSKNYASSRWCLDELAKILECKKTFGQLVLPIFYDVDPSDVRHQTGSFANAFAIHRGLEKVEIWRAALTQVATISGWDLKNVANGHESKFILKIVKEVMRVIKNYTYLDVCTHPVGMDSRAEDLKMLLSNRSDSVCMIGIYGMGGVGKTTTAKAVYNMILQHYECSCFLENVREVSEQLGGLAHLQEKLLSSILMIEKLKVDSVDRGISLMRERLCSKRVLIVLDDLDKLSQVKSLVGGRDWFGSGSTIIITTRDEHLLDLIQVDNKYEAEKLNFTESLELFSWHAFRTNIPLEDYAGLSNSIVSYCGGLPLALEVLG…	1139	4451	https://onlinelibrary.wiley.com/doi/full/10.1111/pbi.13558
PlantKGA_431	Apiales	Araliaceae	Panax	notoginseng	Panax notoginseng		三七	chromosome	Yes	转录本	Pno08G004303t3	Pno08G004303t31288xxPlantKGA_431	Pno08G004303	TN	partial	8	31258994	31263444	-	Pfam	PF01582	TIR domain	Toll/interleukin-1 receptor homology (TIR) domain	20	181	AHDVFLSFRGEDTRKTFTSHLYTALTQAGIRTFLDDSELQRGTDISSELLTAIEQSRVSIIVFSKNYASSRWCLDELAKILECKKTFGQLVLPIFYDVDPSDVRHQTGSFANAFAIHRGLEKVEIWRAALTQVATISGWDLKNVANGHESKFILKIVKEVMR	7.9e-50	MAATSYQASSSCFPSSSSTAHDVFLSFRGEDTRKTFTSHLYTALTQAGIRTFLDDSELQRGTDISSELLTAIEQSRVSIIVFSKNYASSRWCLDELAKILECKKTFGQLVLPIFYDVDPSDVRHQTGSFANAFAIHRGLEKVEIWRAALTQVATISGWDLKNVANGHESKFILKIVKEVMRVIKNYTYLDVCTHPVGMDSRAEDLKMLLSNRSDSVCMIGIYGMGGVGKTTTAKAVYNMILQHYECSCFLENVREVSEQLGGLAHLQEKLLSSILMIEKLKVDSVDRGISLMRERLCSKRVLIVLDDLDKLSQVKSLVGGRDWFGSGSTIIITTRDEHLLDLIQVDNKYEAEKLNFTESLELFSWHAFRTNIPLEDYAGLSNSIVSYCGGLPLALEVLG…	1139	4451	https://onlinelibrary.wiley.com/doi/full/10.1111/pbi.13558
PlantKGA_431	Apiales	Araliaceae	Panax	notoginseng	Panax notoginseng		三七	chromosome	Yes	转录本	Pno08G004582t2	Pno08G004582t21288xxPlantKGA_431	Pno08G004582	TN	partial	8	33542035	33549150	+	Pfam	PF00931	NB-ARC domain	NB-ARC	198	436	VKDLYPQLFTGSNDVCTLGIYGMGGIGKTTLAKTIFDRASRKFESRCFLANVREVSNQPDGLLLLQEQLIFALLKTKKFKVDRVERGLSLIKETIRSKRVLLVLDDLDNLSQLEALAGEWNWFGSGSRIIITTRDVGLLDKSQVTLRYEVKGLDNCESLELFSQHAFRHTAPLEDFVELSKDIISYVGGLPLALEVMGSFLFKKSMKEWKSAFEKLQQIPNQELLKNQKISFESLDYTV	2.6e-30	MACTSIQSVSSRSPSSSPSYDVFLSFRGADTRKTFTGHLFVALQQAGIQTFGDDSDLQMNEQLQSELTKAIQDSYISIVVFSKNYASSRWCLDELVQIMECKRTRGQTVIPVFYDVDPSDVRHQTRNFANHRTWSVDKVENWRAALTEVANISGFVLKDDANGHETVLIQKIVDVVLSEVYREDRNVAKHLVGIDSRVKDLYPQLFTGSNDVCTLGIYGMGGIGKTTLAKTIFDRASRKFESRCFLANVREVSNQPDGLLLLQEQLIFALLKTKKFKVDRVERGLSLIKETIRSKRVLLVLDDLDNLSQLEALAGEWNWFGSGSRIIITTRDVGLLDKSQVTLRYEVKGLDNCESLELFSQHAFRHTAPLEDFVELSKDIISYVGGLPLALEVMGSFLF…	1081	7116	https://onlinelibrary.wiley.com/doi/full/10.1111/pbi.13558
PlantKGA_431	Apiales	Araliaceae	Panax	notoginseng	Panax notoginseng		三七	chromosome	Yes	转录本	Pno08G004582t2	Pno08G004582t21288xxPlantKGA_431	Pno08G004582	TN	partial	8	33542035	33549150	+	Pfam	PF01582	TIR domain	Toll/interleukin-1 receptor homology (TIR) domain	20	178	YDVFLSFRGADTRKTFTGHLFVALQQAGIQTFGDDSDLQMNEQLQSELTKAIQDSYISIVVFSKNYASSRWCLDELVQIMECKRTRGQTVIPVFYDVDPSDVRHQTRNFANHRTWSVDKVENWRAALTEVANISGFVLKDDANGHETVLIQKIVDVVLS	6.4e-41	MACTSIQSVSSRSPSSSPSYDVFLSFRGADTRKTFTGHLFVALQQAGIQTFGDDSDLQMNEQLQSELTKAIQDSYISIVVFSKNYASSRWCLDELVQIMECKRTRGQTVIPVFYDVDPSDVRHQTRNFANHRTWSVDKVENWRAALTEVANISGFVLKDDANGHETVLIQKIVDVVLSEVYREDRNVAKHLVGIDSRVKDLYPQLFTGSNDVCTLGIYGMGGIGKTTLAKTIFDRASRKFESRCFLANVREVSNQPDGLLLLQEQLIFALLKTKKFKVDRVERGLSLIKETIRSKRVLLVLDDLDNLSQLEALAGEWNWFGSGSRIIITTRDVGLLDKSQVTLRYEVKGLDNCESLELFSQHAFRHTAPLEDFVELSKDIISYVGGLPLALEVMGSFLF…	1081	7116	https://onlinelibrary.wiley.com/doi/full/10.1111/pbi.13558
PlantKGA_431	Apiales	Araliaceae	Panax	notoginseng	Panax notoginseng		三七	chromosome	Yes	转录本	Pno08G004588t2	Pno08G004588t21288xxPlantKGA_431	Pno08G004588	TN	partial	8	33578066	33585916	+	Pfam	PF01582	TIR domain	Toll/interleukin-1 receptor homology (TIR) domain	19	184	HVFLSFRGELRKTFIGHLYNGLKDAGIRTFIDEDALERGEEISAELPKAIQYSTMSIIVFSRNYASSSWCLEELVEILECKRTMGHSVLPVFYDVEPTVVRYQKGSFAEAFKRHKKRYKHKVEGWKAALNRVADLSGYHLQNDANGHEANLIKLIVKDVLPKLNRK	8e-42	MASTSTPSSSSPSLSPCWHVFLSFRGELRKTFIGHLYNGLKDAGIRTFIDEDALERGEEISAELPKAIQYSTMSIIVFSRNYASSSWCLEELVEILECKRTMGHSVLPVFYDVEPTVVRYQKGSFAEAFKRHKKRYKHKVEGWKAALNRVADLSGYHLQNDANGHEANLIKLIVKDVLPKLNRKDWNVVTYPVGIDSRVKDIYPQLSIGTSDVRFIGIYGMAGIGKTTVVKDIYDRTFHHFERSCFLENVREALKEPHGLHSLLNQLIIELVKVKNFKFADVDRGIFLLKQTLRSKRVLIVLDDLDQLSQLTPFAGDSNWFSSGSRIIITTRDACLLDKIQILDLRYEVKKLDNNESLEVFNRHAFRNSNPPTEDFMELSRRFVKYIGGLPLGLQKIGS…	1013	7851	https://onlinelibrary.wiley.com/doi/full/10.1111/pbi.13558
PlantKGA_431	Apiales	Araliaceae	Panax	notoginseng	Panax notoginseng		三七	chromosome	Yes	转录本	Pno08G004588t2	Pno08G004588t21288xxPlantKGA_431	Pno08G004588	TN	partial	8	33578066	33585916	+	Pfam	PF00931	NB-ARC domain	NB-ARC	199	412	VKDIYPQLSIGTSDVRFIGIYGMAGIGKTTVVKDIYDRTFHHFERSCFLENVREALKEPHGLHSLLNQLIIELVKVKNFKFADVDRGIFLLKQTLRSKRVLIVLDDLDQLSQLTPFAGDSNWFSSGSRIIITTRDACLLDKIQILDLRYEVKKLDNNESLEVFNRHAFRNSNPPTEDFMELSRRFVKYIGGLPLGLQKIGSFLFQKNMFVWKLS	8.8e-24	MASTSTPSSSSPSLSPCWHVFLSFRGELRKTFIGHLYNGLKDAGIRTFIDEDALERGEEISAELPKAIQYSTMSIIVFSRNYASSSWCLEELVEILECKRTMGHSVLPVFYDVEPTVVRYQKGSFAEAFKRHKKRYKHKVEGWKAALNRVADLSGYHLQNDANGHEANLIKLIVKDVLPKLNRKDWNVVTYPVGIDSRVKDIYPQLSIGTSDVRFIGIYGMAGIGKTTVVKDIYDRTFHHFERSCFLENVREALKEPHGLHSLLNQLIIELVKVKNFKFADVDRGIFLLKQTLRSKRVLIVLDDLDQLSQLTPFAGDSNWFSSGSRIIITTRDACLLDKIQILDLRYEVKKLDNNESLEVFNRHAFRNSNPPTEDFMELSRRFVKYIGGLPLGLQKIGS…	1013	7851	https://onlinelibrary.wiley.com/doi/full/10.1111/pbi.13558
PlantKGA_431	Apiales	Araliaceae	Panax	notoginseng	Panax notoginseng		三七	chromosome	Yes	转录本	Pno08G004643t1	Pno08G004643t11288xxPlantKGA_431	Pno08G004643	TN	partial	8	33990861	33997326	+	Pfam	PF00931	NB-ARC domain	NB-ARC	29	103	NQFALGSRIIITTRDAGLLDQIEVEERYNVEELDDEECLKLFSQHAFKKPVPSEDYVEISKGIVRQAGGLPLALE	4.3e-10	MLTPRSSPASQSRQWNHLSHSDQLAGQWNQFALGSRIIITTRDAGLLDQIEVEERYNVEELDDEECLKLFSQHAFKKPVPSEDYVEISKGIVRQAGGLPLALEGCNLKCLPSNFHPEKLVILDLKYSKINMLWHGILFLEQLKILNLNRCEFLTTTPNFTGVPNLEKLLLGWCIRLAEIHPSIGQLSSCLDLKELPEELGNIESLRELLASHSGILKLPDSIGRLSRLVNLDLGYCCNLSTLPNSFCNLRVLESLRLTCCKNLKGLPEELGNIESLRVLRAGNTAITKLPDSIGRLTKLFELDLFCCGKLKNIPSSIYNTLPSNLSQLSNLKSLDLRLCRNLWSLSKLPPNSEDLDATGCTSMVRLPNLSNLKHLRVLYLEGCSRLAEIQGLENLNSIE…	903	6466	https://onlinelibrary.wiley.com/doi/full/10.1111/pbi.13558
PlantKGA_431	Apiales	Araliaceae	Panax	notoginseng	Panax notoginseng		三七	chromosome	Yes	转录本	Pno08G004643t1	Pno08G004643t11288xxPlantKGA_431	Pno08G004643	TN	partial	8	33990861	33997326	+	Pfam	PF00931	NB-ARC domain	NB-ARC	639	876	SRVKEICQKLSIGSNDVRFIGIYGMAGIGKTTIVKSLYNKIYKEFEDSCFLENVREAFEEPRGLHYLLEQLIFQLVKIKDFKVTNIDAGISFVKQRLRSKKVLIVLDDLDEIKQLESLAGNWNWFGLGSKIIITTRDSRLLVEFQVDLRHEVNELDDDESLELFRWHAFRNTTPLEKNLMELSENIVRYVGGLPLALKVLGSSLFDRPMVQWESVFGKLKEIPHKDIQKKLRISYDAL	1.3e-29	MLTPRSSPASQSRQWNHLSHSDQLAGQWNQFALGSRIIITTRDAGLLDQIEVEERYNVEELDDEECLKLFSQHAFKKPVPSEDYVEISKGIVRQAGGLPLALEGCNLKCLPSNFHPEKLVILDLKYSKINMLWHGILFLEQLKILNLNRCEFLTTTPNFTGVPNLEKLLLGWCIRLAEIHPSIGQLSSCLDLKELPEELGNIESLRELLASHSGILKLPDSIGRLSRLVNLDLGYCCNLSTLPNSFCNLRVLESLRLTCCKNLKGLPEELGNIESLRVLRAGNTAITKLPDSIGRLTKLFELDLFCCGKLKNIPSSIYNTLPSNLSQLSNLKSLDLRLCRNLWSLSKLPPNSEDLDATGCTSMVRLPNLSNLKHLRVLYLEGCSRLAEIQGLENLNSIE…	903	6466	https://onlinelibrary.wiley.com/doi/full/10.1111/pbi.13558
PlantKGA_431	Apiales	Araliaceae	Panax	notoginseng	Panax notoginseng		三七	chromosome	Yes	转录本	Pno08G004643t1	Pno08G004643t11288xxPlantKGA_431	Pno08G004643	TN	partial	8	33990861	33997326	+	Pfam	PF01582	TIR domain	Toll/interleukin-1 receptor homology (TIR) domain	460	623	DLFLSFEGKDTRRSFIGHLYSALDQAGIRTFKDELGLERGGEIAPQLIKAIHDSKMSIVVFSKNYASSKWCLNELAEILECERTKGQIVLPVFYDVDPLNVRHQTESYAEAFEKHKIRYAEKVETWRGALTTVANISGYDLKKDSNEHEADLIQKIVNDVLLKL	1.9e-45	MLTPRSSPASQSRQWNHLSHSDQLAGQWNQFALGSRIIITTRDAGLLDQIEVEERYNVEELDDEECLKLFSQHAFKKPVPSEDYVEISKGIVRQAGGLPLALEGCNLKCLPSNFHPEKLVILDLKYSKINMLWHGILFLEQLKILNLNRCEFLTTTPNFTGVPNLEKLLLGWCIRLAEIHPSIGQLSSCLDLKELPEELGNIESLRELLASHSGILKLPDSIGRLSRLVNLDLGYCCNLSTLPNSFCNLRVLESLRLTCCKNLKGLPEELGNIESLRVLRAGNTAITKLPDSIGRLTKLFELDLFCCGKLKNIPSSIYNTLPSNLSQLSNLKSLDLRLCRNLWSLSKLPPNSEDLDATGCTSMVRLPNLSNLKHLRVLYLEGCSRLAEIQGLENLNSIE…	903	6466	https://onlinelibrary.wiley.com/doi/full/10.1111/pbi.13558
PlantKGA_431	Apiales	Araliaceae	Panax	notoginseng	Panax notoginseng		三七	chromosome	Yes	转录本	Pno08G004654t1	Pno08G004654t11288xxPlantKGA_431	Pno08G004654	TN	partial	8	34076714	34090605	+	Pfam	PF01582	TIR domain	Toll/interleukin-1 receptor homology (TIR) domain	22	187	WDVFLSFGGKDTRRNFIGHLYSALDQVGIRTFKDEPGLERGEEIAPQLIKAIHDSKMSIVVFSKNYASSKWCLNELAEILECERTRGQIVLPVFYDVDPLNVRHQTESYAEAFEKHKLLYSEKAETWRAALTTTANISGYDLKNDANGHEADLIQKIVNDVLMKLC	8e-44	MAGTSKQTDSSCFPSSSSFKFWDVFLSFGGKDTRRNFIGHLYSALDQVGIRTFKDEPGLERGEEIAPQLIKAIHDSKMSIVVFSKNYASSKWCLNELAEILECERTRGQIVLPVFYDVDPLNVRHQTESYAEAFEKHKLLYSEKAETWRAALTTTANISGYDLKNDANGHEADLIQKIVNDVLMKLCPKYLNVSDHPVGIDSRVKGINQKLRIGSNDVRFIGIYGMAGIGKTTIVKALYNKIYREFEGSCFLENVGEAFDQPRGLHYLLEQLIFQLLKIKDFKVPSEDAGISFVKQRLRSKKVLIVLDDLDEMKQLKSLAGNQEWFGPGSRIIVTTRDLRLLAKFEENLRHEVKELDNNESLELFKRHAFGNTTPLKNLMGLSKDIVRYVGGLPLALEV…	1998	13892	https://onlinelibrary.wiley.com/doi/full/10.1111/pbi.13558
PlantKGA_431	Apiales	Araliaceae	Panax	notoginseng	Panax notoginseng		三七	chromosome	Yes	转录本	Pno08G004654t1	Pno08G004654t11288xxPlantKGA_431	Pno08G004654	TN	partial	8	34076714	34090605	+	Pfam	PF00931	NB-ARC domain	NB-ARC	203	442	RVKGINQKLRIGSNDVRFIGIYGMAGIGKTTIVKALYNKIYREFEGSCFLENVGEAFDQPRGLHYLLEQLIFQLLKIKDFKVPSEDAGISFVKQRLRSKKVLIVLDDLDEMKQLKSLAGNQEWFGPGSRIIVTTRDLRLLAKFEENLRHEVKELDNNESLELFKRHAFGNTTPLKNLMGLSKDIVRYVGGLPLALEVLGSSLFDRPMVQWESVFGKLKKIPHKDIQKKLRISYDALDDIV	1.2e-26	MAGTSKQTDSSCFPSSSSFKFWDVFLSFGGKDTRRNFIGHLYSALDQVGIRTFKDEPGLERGEEIAPQLIKAIHDSKMSIVVFSKNYASSKWCLNELAEILECERTRGQIVLPVFYDVDPLNVRHQTESYAEAFEKHKLLYSEKAETWRAALTTTANISGYDLKNDANGHEADLIQKIVNDVLMKLCPKYLNVSDHPVGIDSRVKGINQKLRIGSNDVRFIGIYGMAGIGKTTIVKALYNKIYREFEGSCFLENVGEAFDQPRGLHYLLEQLIFQLLKIKDFKVPSEDAGISFVKQRLRSKKVLIVLDDLDEMKQLKSLAGNQEWFGPGSRIIVTTRDLRLLAKFEENLRHEVKELDNNESLELFKRHAFGNTTPLKNLMGLSKDIVRYVGGLPLALEV…	1998	13892	https://onlinelibrary.wiley.com/doi/full/10.1111/pbi.13558
PlantKGA_431	Apiales	Araliaceae	Panax	notoginseng	Panax notoginseng		三七	chromosome	Yes	转录本	Pno08G004678t1	Pno08G004678t11288xxPlantKGA_431	Pno08G004678	TN	partial	8	34237250	34250528	+	Pfam	PF00931	NB-ARC domain	NB-ARC	202	429	SRVKEICQKLSIGSNDVRFIGIYGMPGIGKTTIVKALYNKIYKKFEGSCFLENVREAFEEPRGLHYLLDQLIFQLLKIKDFKVTSVDTGISFVKQRLRSKKVLIVLDDLDEIKQLESLAGNWNWFGPGSRIIVTTRDSRLLVECQVDLMHEVEELNGNESLKLFRRHAFRNTTPMKNLMELSKDIVKYVGGLPLALEVLGSSLFDRPMVQWESVFGKLKKIPHKDIQK	1.1e-27	MADTSKQTDSPCLQSSSSFKFWDVFLSFGGKDTRRSFIGHLYSALDQAGIRTFKDEPGLERGEEIAPQLIKAIHDSKMSIVVFSKNYASSKWCLNELTEIHECERTRGQIVLPVFYDVDPLNVRHQTESYAKAFEKHKIRHAEKVDTWRAALTATANISGYDLKNDANGHEANLIQKIVNDVLMKLCPKNLNVTEHQVGIDSRVKEICQKLSIGSNDVRFIGIYGMPGIGKTTIVKALYNKIYKKFEGSCFLENVREAFEEPRGLHYLLDQLIFQLLKIKDFKVTSVDTGISFVKQRLRSKKVLIVLDDLDEIKQLESLAGNWNWFGPGSRIIVTTRDSRLLVECQVDLMHEVEELNGNESLKLFRRHAFRNTTPMKNLMELSKDIVKYVGGLPLALEV…	1936	13279	https://onlinelibrary.wiley.com/doi/full/10.1111/pbi.13558
PlantKGA_431	Apiales	Araliaceae	Panax	notoginseng	Panax notoginseng		三七	chromosome	Yes	转录本	Pno08G004678t1	Pno08G004678t11288xxPlantKGA_431	Pno08G004678	TN	partial	8	34237250	34250528	+	Pfam	PF01582	TIR domain	Toll/interleukin-1 receptor homology (TIR) domain	22	189	WDVFLSFGGKDTRRSFIGHLYSALDQAGIRTFKDEPGLERGEEIAPQLIKAIHDSKMSIVVFSKNYASSKWCLNELTEIHECERTRGQIVLPVFYDVDPLNVRHQTESYAKAFEKHKIRHAEKVDTWRAALTATANISGYDLKNDANGHEANLIQKIVNDVLMKLCPK	4.1e-44	MADTSKQTDSPCLQSSSSFKFWDVFLSFGGKDTRRSFIGHLYSALDQAGIRTFKDEPGLERGEEIAPQLIKAIHDSKMSIVVFSKNYASSKWCLNELTEIHECERTRGQIVLPVFYDVDPLNVRHQTESYAKAFEKHKIRHAEKVDTWRAALTATANISGYDLKNDANGHEANLIQKIVNDVLMKLCPKNLNVTEHQVGIDSRVKEICQKLSIGSNDVRFIGIYGMPGIGKTTIVKALYNKIYKKFEGSCFLENVREAFEEPRGLHYLLDQLIFQLLKIKDFKVTSVDTGISFVKQRLRSKKVLIVLDDLDEIKQLESLAGNWNWFGPGSRIIVTTRDSRLLVECQVDLMHEVEELNGNESLKLFRRHAFRNTTPMKNLMELSKDIVKYVGGLPLALEV…	1936	13279	https://onlinelibrary.wiley.com/doi/full/10.1111/pbi.13558
PlantKGA_431	Apiales	Araliaceae	Panax	notoginseng	Panax notoginseng		三七	chromosome	Yes	转录本	Pno08G004688t1	Pno08G004688t11288xxPlantKGA_431	Pno08G004688	TN	partial	8	34298359	34304311	+	Pfam	PF01582	TIR domain	Toll/interleukin-1 receptor homology (TIR) domain	22	193	WDVFLSFGGKDTRRNFIGNLYFALDQAGIRTFKDESGLERAEEIASQLIKAIHDSKISIVVFSKNYGASKWCLNELAEILECKRIRRQIVLPVFYDVDPLNVRHQTDCYAKTFEKHKIRYAKELVETWKVALTTTANISGYDLKNDANGHEADLIQKIVNDVLMKLCPKYLN	1.1e-39	MAGTSKQTDSSYFPSSSSFKFWDVFLSFGGKDTRRNFIGNLYFALDQAGIRTFKDESGLERAEEIASQLIKAIHDSKISIVVFSKNYGASKWCLNELAEILECKRIRRQIVLPVFYDVDPLNVRHQTDCYAKTFEKHKIRYAKELVETWKVALTTTANISGYDLKNDANGHEADLIQKIVNDVLMKLCPKYLNVTDHQVGIDSRVREISQKLGIGSNDVSFIGIYGMAGIGKTTIVKALYNKIYKEFESSCFLENVREAFEEPRGLHYLQEQLIFQLLKIKDFKVTSVDTGISFVKQRLRSKKVLIVLDDLDQLKQLESLAGNWNWFGLGSKIIVTTRDSRLLVEFQVDLRHEVKELNDDESLELFRWHAFRNTTPLKKNLMELSENIVRYVGGLPLAL…	1158	5953	https://onlinelibrary.wiley.com/doi/full/10.1111/pbi.13558
PlantKGA_431	Apiales	Araliaceae	Panax	notoginseng	Panax notoginseng		三七	chromosome	Yes	转录本	Pno08G004688t1	Pno08G004688t11288xxPlantKGA_431	Pno08G004688	TN	partial	8	34298359	34304311	+	Pfam	PF00931	NB-ARC domain	NB-ARC	203	440	SRVREISQKLGIGSNDVSFIGIYGMAGIGKTTIVKALYNKIYKEFESSCFLENVREAFEEPRGLHYLQEQLIFQLLKIKDFKVTSVDTGISFVKQRLRSKKVLIVLDDLDQLKQLESLAGNWNWFGLGSKIIVTTRDSRLLVEFQVDLRHEVKELNDDESLELFRWHAFRNTTPLKKNLMELSENIVRYVGGLPLALKVLGSSLFERSMVEWESVYGKMKEIPHRHIQKKLRISYDSL	3.8e-30	MAGTSKQTDSSYFPSSSSFKFWDVFLSFGGKDTRRNFIGNLYFALDQAGIRTFKDESGLERAEEIASQLIKAIHDSKISIVVFSKNYGASKWCLNELAEILECKRIRRQIVLPVFYDVDPLNVRHQTDCYAKTFEKHKIRYAKELVETWKVALTTTANISGYDLKNDANGHEADLIQKIVNDVLMKLCPKYLNVTDHQVGIDSRVREISQKLGIGSNDVSFIGIYGMAGIGKTTIVKALYNKIYKEFESSCFLENVREAFEEPRGLHYLQEQLIFQLLKIKDFKVTSVDTGISFVKQRLRSKKVLIVLDDLDQLKQLESLAGNWNWFGLGSKIIVTTRDSRLLVEFQVDLRHEVKELNDDESLELFRWHAFRNTTPLKKNLMELSENIVRYVGGLPLAL…	1158	5953	https://onlinelibrary.wiley.com/doi/full/10.1111/pbi.13558
PlantKGA_431	Apiales	Araliaceae	Panax	notoginseng	Panax notoginseng		三七	chromosome	Yes	转录本	Pno08G004693t1	Pno08G004693t11288xxPlantKGA_431	Pno08G004693	TN	partial	8	34347936	34351667	+	Pfam	PF01582	TIR domain	Toll/interleukin-1 receptor homology (TIR) domain	23	186	DLFLSFGGKDTRRNFIGHLYSALDQAGIRTFKDEHGLERGEEIAPQLIKAIHDSKMSIVVFSKNYASSKWCLNELVEILECERTRGQIVLPVFYDVDPLNVRHQTESYAEAFEKHKICYAEKVKTWRAALITAANISGYDLKNDANGHAAVLIQKIVNDVLMKL	4e-44	MVGTSKQTDSSCFPSSSSFKFWDLFLSFGGKDTRRNFIGHLYSALDQAGIRTFKDEHGLERGEEIAPQLIKAIHDSKMSIVVFSKNYASSKWCLNELVEILECERTRGQIVLPVFYDVDPLNVRHQTESYAEAFEKHKICYAEKVKTWRAALITAANISGYDLKNDANGHAAVLIQKIVNDVLMKLCPKYLNVTELQVGIDSRVKKICQKLSIGSNDVRFIGIYGMARIGKTTIVKPLHNKIYKKFESTCFLENVREAFEESRGLHYLLEQLIFQLLKIKDFKFTGVDTGISLVKQRLRSKNVLIIVDGSRIIVTASNVRVLDEFQVDLRHEVEELDINESSELFKRHAFRNTTPLKNKLELSNDIIRYVGGLPLALKVLGSSLFDRPMVQWESVFGKL…	464	3732	https://onlinelibrary.wiley.com/doi/full/10.1111/pbi.13558
PlantKGA_431	Apiales	Araliaceae	Panax	notoginseng	Panax notoginseng		三七	chromosome	Yes	转录本	Pno08G004693t1	Pno08G004693t11288xxPlantKGA_431	Pno08G004693	TN	partial	8	34347936	34351667	+	Pfam	PF00931	NB-ARC domain	NB-ARC	308	418	DGSRIIVTASNVRVLDEFQVDLRHEVEELDINESSELFKRHAFRNTTPLKNKLELSNDIIRYVGGLPLALKVLGSSLFDRPMVQWESVFGKLKKIPHNHIQKKLRISYDAL	7.3e-10	MVGTSKQTDSSCFPSSSSFKFWDLFLSFGGKDTRRNFIGHLYSALDQAGIRTFKDEHGLERGEEIAPQLIKAIHDSKMSIVVFSKNYASSKWCLNELVEILECERTRGQIVLPVFYDVDPLNVRHQTESYAEAFEKHKICYAEKVKTWRAALITAANISGYDLKNDANGHAAVLIQKIVNDVLMKLCPKYLNVTELQVGIDSRVKKICQKLSIGSNDVRFIGIYGMARIGKTTIVKPLHNKIYKKFESTCFLENVREAFEESRGLHYLLEQLIFQLLKIKDFKFTGVDTGISLVKQRLRSKNVLIIVDGSRIIVTASNVRVLDEFQVDLRHEVEELDINESSELFKRHAFRNTTPLKNKLELSNDIIRYVGGLPLALKVLGSSLFDRPMVQWESVFGKL…	464	3732	https://onlinelibrary.wiley.com/doi/full/10.1111/pbi.13558
PlantKGA_431	Apiales	Araliaceae	Panax	notoginseng	Panax notoginseng		三七	chromosome	Yes	转录本	Pno08G004752t1	Pno08G004752t11288xxPlantKGA_431	Pno08G004752	TN	partial	8	34792884	34803732	-	Pfam	PF00931	NB-ARC domain	NB-ARC	210	432	YVTPLLSIGTNDIRRIGIYGMGGIGKTTIAKALFNKNFQYFEGSCFLSNVREGSEERNGILRLQGQLLSDILKVKDIHVENVDIGISLLKERLRFKKVLIVLDDLNHLNQSDQLAGQWNQFALGSRIIITTRDAGLLDQIEVEERYNVEELDDEESLELFSQHAFKKPIPSKDYVEISKGIVRQAGGLPLALEVLGSYLFKRTMVQWRSSLDKLEQIPQHEIQ	4.5e-28	MASTSNQIDSSSSSSSSSSTPRWNVFLSFRGKDTRKSFTGHLYSALDRAGIQTFMDDPELPRGEEISLQLLKAIEESKVSIVVFSKNYASSRWCLDELVKILECKRTKGQLVLPVFYNVDPSVVRHKTGSFAEAFESHKKRFGNNMEIVEKWEGALTEAANLSGYDLENDANGHEAKLIQIIVQKVLLKVNLVCLHIAKQPVGIESRVEYVTPLLSIGTNDIRRIGIYGMGGIGKTTIAKALFNKNFQYFEGSCFLSNVREGSEERNGILRLQGQLLSDILKVKDIHVENVDIGISLLKERLRFKKVLIVLDDLNHLNQSDQLAGQWNQFALGSRIIITTRDAGLLDQIEVEERYNVEELDDEESLELFSQHAFKKPIPSKDYVEISKGIVRQAGGLPL…	1123	10849	https://onlinelibrary.wiley.com/doi/full/10.1111/pbi.13558
PlantKGA_431	Apiales	Araliaceae	Panax	notoginseng	Panax notoginseng		三七	chromosome	Yes	转录本	Pno08G004752t1	Pno08G004752t11288xxPlantKGA_431	Pno08G004752	TN	partial	8	34792884	34803732	-	Pfam	PF01582	TIR domain	Toll/interleukin-1 receptor homology (TIR) domain	24	187	NVFLSFRGKDTRKSFTGHLYSALDRAGIQTFMDDPELPRGEEISLQLLKAIEESKVSIVVFSKNYASSRWCLDELVKILECKRTKGQLVLPVFYNVDPSVVRHKTGSFAEAFESHKKRFGNNMEIVEKWEGALTEAANLSGYDLENDANGHEAKLIQIIVQKVL	1.7e-46	MASTSNQIDSSSSSSSSSSTPRWNVFLSFRGKDTRKSFTGHLYSALDRAGIQTFMDDPELPRGEEISLQLLKAIEESKVSIVVFSKNYASSRWCLDELVKILECKRTKGQLVLPVFYNVDPSVVRHKTGSFAEAFESHKKRFGNNMEIVEKWEGALTEAANLSGYDLENDANGHEAKLIQIIVQKVLLKVNLVCLHIAKQPVGIESRVEYVTPLLSIGTNDIRRIGIYGMGGIGKTTIAKALFNKNFQYFEGSCFLSNVREGSEERNGILRLQGQLLSDILKVKDIHVENVDIGISLLKERLRFKKVLIVLDDLNHLNQSDQLAGQWNQFALGSRIIITTRDAGLLDQIEVEERYNVEELDDEESLELFSQHAFKKPIPSKDYVEISKGIVRQAGGLPL…	1123	10849	https://onlinelibrary.wiley.com/doi/full/10.1111/pbi.13558
PlantKGA_431	Apiales	Araliaceae	Panax	notoginseng	Panax notoginseng		三七	chromosome	Yes	转录本	Pno08G004854t1	Pno08G004854t11288xxPlantKGA_431	Pno08G004854	TN	partial	8	35741519	35747195	+	Pfam	PF01582	TIR domain	Toll/interleukin-1 receptor homology (TIR) domain	22	179	WNVFLSFRGEDTRRNFTGHLYTALNQAGIRTFMDDSELQRGEEISSALRRAMQESKIFIVIFSTNYASSKWCLDELVKILECKRTTGQLVLPVFYKVDPTSVREQTGSFAKAKEHFVSHMSAAEKWRAALTEAANLSGYHLDANGQEDKLIQGIVEKV	3.5e-45	MAYRIDQTASSCFPSSSSSPNWNVFLSFRGEDTRRNFTGHLYTALNQAGIRTFMDDSELQRGEEISSALRRAMQESKIFIVIFSTNYASSKWCLDELVKILECKRTTGQLVLPVFYKVDPTSVREQTGSFAKAKEHFVSHMSAAEKWRAALTEAANLSGYHLDANGQEDKLIQGIVEKVLLEVRPTYLNVAKHPVGIKSRVKALTTLLSLGTDDIRMIGIYGMGGIGKTTIAKAVYNKSYRCFEGYCFVANVREVSKQTNGLVRLQEQILSDVLKIKNQVTNVERGINLMEERFHCKKVLIVLDDMDEVIQLDSLAGQTSWFAPGSRIIITTRDVRLLDQVQVNVRYQVEELDNKESLELFSQHAFRETIPLEDYIDLSNGIVRYAGGLPLALEVLGSY…	1225	5677	https://onlinelibrary.wiley.com/doi/full/10.1111/pbi.13558
PlantKGA_431	Apiales	Araliaceae	Panax	notoginseng	Panax notoginseng		三七	chromosome	Yes	转录本	Pno08G004854t1	Pno08G004854t11288xxPlantKGA_431	Pno08G004854	TN	partial	8	35741519	35747195	+	Pfam	PF00931	NB-ARC domain	NB-ARC	202	425	KALTTLLSLGTDDIRMIGIYGMGGIGKTTIAKAVYNKSYRCFEGYCFVANVREVSKQTNGLVRLQEQILSDVLKIKNQVTNVERGINLMEERFHCKKVLIVLDDMDEVIQLDSLAGQTSWFAPGSRIIITTRDVRLLDQVQVNVRYQVEELDNKESLELFSQHAFRETIPLEDYIDLSNGIVRYAGGLPLALEVLGSYLFKRNIVEWRSSFEKLQQIPHQIQEK	7.7e-31	MAYRIDQTASSCFPSSSSSPNWNVFLSFRGEDTRRNFTGHLYTALNQAGIRTFMDDSELQRGEEISSALRRAMQESKIFIVIFSTNYASSKWCLDELVKILECKRTTGQLVLPVFYKVDPTSVREQTGSFAKAKEHFVSHMSAAEKWRAALTEAANLSGYHLDANGQEDKLIQGIVEKVLLEVRPTYLNVAKHPVGIKSRVKALTTLLSLGTDDIRMIGIYGMGGIGKTTIAKAVYNKSYRCFEGYCFVANVREVSKQTNGLVRLQEQILSDVLKIKNQVTNVERGINLMEERFHCKKVLIVLDDMDEVIQLDSLAGQTSWFAPGSRIIITTRDVRLLDQVQVNVRYQVEELDNKESLELFSQHAFRETIPLEDYIDLSNGIVRYAGGLPLALEVLGSY…	1225	5677	https://onlinelibrary.wiley.com/doi/full/10.1111/pbi.13558
PlantKGA_431	Apiales	Araliaceae	Panax	notoginseng	Panax notoginseng		三七	chromosome	Yes	转录本	Pno08G005037t1	Pno08G005037t11288xxPlantKGA_431	Pno08G005037	TN	partial	8	36996757	37001304	+	Pfam	PF01582	TIR domain	Toll/interleukin-1 receptor homology (TIR) domain	24	184	NVFLNFRGDDTRKNFTGHLYSALDRAGIRTFMDNPELPRGEDISSGLLKAIQESKLSIVVFSKNYASSTWCLTELVKILECKRTTKHLVLPVFYNVHPSEVRNQIGSFAEAFEKHKKCYVADMDKVDMWRLALAEAGNLSGYHIDENGHETKIIQDIVSKV	2.6e-42	MDSTSNQIDSSYSVPSTCLAPRWNVFLNFRGDDTRKNFTGHLYSALDRAGIRTFMDNPELPRGEDISSGLLKAIQESKLSIVVFSKNYASSTWCLTELVKILECKRTTKHLVLPVFYNVHPSEVRNQIGSFAEAFEKHKKCYVADMDKVDMWRLALAEAGNLSGYHIDENGHETKIIQDIVSKVVLEVNPRYLNVAKHPVGIKSRVEHIYPLLSIGSNSVRRIGIYGMGGAGKSTMAKAVYNDIIHCFEGTCFIENVREFSKQHYGLVSLQKQLVWDILKIKENISNVDEGISLIEQRLCSKKILIVLDDVDHRTQSYSLAGEWNRFAPGSRIIITTRDAGVLNQIGVDERYNIEGLEKDESLLLFSWHAFRKPTPLENYKKISEDIVHYTAGLPLALE…	1213	4548	https://onlinelibrary.wiley.com/doi/full/10.1111/pbi.13558
PlantKGA_431	Apiales	Araliaceae	Panax	notoginseng	Panax notoginseng		三七	chromosome	Yes	转录本	Pno08G005037t1	Pno08G005037t11288xxPlantKGA_431	Pno08G005037	TN	partial	8	36996757	37001304	+	Pfam	PF00931	NB-ARC domain	NB-ARC	207	428	EHIYPLLSIGSNSVRRIGIYGMGGAGKSTMAKAVYNDIIHCFEGTCFIENVREFSKQHYGLVSLQKQLVWDILKIKENISNVDEGISLIEQRLCSKKILIVLDDVDHRTQSYSLAGEWNRFAPGSRIIITTRDAGVLNQIGVDERYNIEGLEKDESLLLFSWHAFRKPTPLENYKKISEDIVHYTAGLPLALEVLGSYLYTRTLEEWRGSFKKLQQIPRNEI	7.6e-30	MDSTSNQIDSSYSVPSTCLAPRWNVFLNFRGDDTRKNFTGHLYSALDRAGIRTFMDNPELPRGEDISSGLLKAIQESKLSIVVFSKNYASSTWCLTELVKILECKRTTKHLVLPVFYNVHPSEVRNQIGSFAEAFEKHKKCYVADMDKVDMWRLALAEAGNLSGYHIDENGHETKIIQDIVSKVVLEVNPRYLNVAKHPVGIKSRVEHIYPLLSIGSNSVRRIGIYGMGGAGKSTMAKAVYNDIIHCFEGTCFIENVREFSKQHYGLVSLQKQLVWDILKIKENISNVDEGISLIEQRLCSKKILIVLDDVDHRTQSYSLAGEWNRFAPGSRIIITTRDAGVLNQIGVDERYNIEGLEKDESLLLFSWHAFRKPTPLENYKKISEDIVHYTAGLPLALE…	1213	4548	https://onlinelibrary.wiley.com/doi/full/10.1111/pbi.13558
PlantKGA_431	Apiales	Araliaceae	Panax	notoginseng	Panax notoginseng		三七	chromosome	Yes	转录本	Pno08G007874t1	Pno08G007874t11288xxPlantKGA_431	Pno08G007874	TN	partial	8	55975513	55982399	+	Pfam	PF01582	TIR domain	Toll/interleukin-1 receptor homology (TIR) domain	24	186	NVFLSFRGKDTRKSFTGHLYSALDRAGVQTFMDDPELPRGEEISLQLLKAIEESKVSIVVFSKNYASSRWCLDELVKILECKRTMGHLVLPVFYNVDPSVVRHKTRSFAEAFESHKKRFGNNMEIVEKWEGALTDAANLLGYDLENDANGHEEKLIQLIVQKV	1.4e-42	MASTSNQIDSSSSSSSSSSTPRWNVFLSFRGKDTRKSFTGHLYSALDRAGVQTFMDDPELPRGEEISLQLLKAIEESKVSIVVFSKNYASSRWCLDELVKILECKRTMGHLVLPVFYNVDPSVVRHKTRSFAEAFESHKKRFGNNMEIVEKWEGALTDAANLLGYDLENDANGHEEKLIQLIVQKVLLEVNLVCLHIAKQPVGIESRVEYVTPLLSIGTNDIRRIGIYGMGGIGKTTIAKALFNKNFQYFEGSCFLSNVRESSEERNGILRLQEQLLSDILKVKDIHIENVDIGISLLKERIRFKKVLIVLDDLNHLSQSDQLAGLWNQFALGSRIIITTRDVGLLDQIEVEERYNVEELDDEESLELFSQHAFKKPVPSEDYVEISKGIVRQARGLPL…	1124	6887	https://onlinelibrary.wiley.com/doi/full/10.1111/pbi.13558
PlantKGA_431	Apiales	Araliaceae	Panax	notoginseng	Panax notoginseng		三七	chromosome	Yes	转录本	Pno08G007874t1	Pno08G007874t11288xxPlantKGA_431	Pno08G007874	TN	partial	8	55975513	55982399	+	Pfam	PF00931	NB-ARC domain	NB-ARC	210	432	YVTPLLSIGTNDIRRIGIYGMGGIGKTTIAKALFNKNFQYFEGSCFLSNVRESSEERNGILRLQEQLLSDILKVKDIHIENVDIGISLLKERIRFKKVLIVLDDLNHLSQSDQLAGLWNQFALGSRIIITTRDVGLLDQIEVEERYNVEELDDEESLELFSQHAFKKPVPSEDYVEISKGIVRQARGLPLALEVLGSYLFKRTMVEWRSSLDKLEQIPQHEIQ	2.5e-29	MASTSNQIDSSSSSSSSSSTPRWNVFLSFRGKDTRKSFTGHLYSALDRAGVQTFMDDPELPRGEEISLQLLKAIEESKVSIVVFSKNYASSRWCLDELVKILECKRTMGHLVLPVFYNVDPSVVRHKTRSFAEAFESHKKRFGNNMEIVEKWEGALTDAANLLGYDLENDANGHEEKLIQLIVQKVLLEVNLVCLHIAKQPVGIESRVEYVTPLLSIGTNDIRRIGIYGMGGIGKTTIAKALFNKNFQYFEGSCFLSNVRESSEERNGILRLQEQLLSDILKVKDIHIENVDIGISLLKERIRFKKVLIVLDDLNHLSQSDQLAGLWNQFALGSRIIITTRDVGLLDQIEVEERYNVEELDDEESLELFSQHAFKKPVPSEDYVEISKGIVRQARGLPL…	1124	6887	https://onlinelibrary.wiley.com/doi/full/10.1111/pbi.13558
PlantKGA_431	Apiales	Araliaceae	Panax	notoginseng	Panax notoginseng		三七	chromosome	Yes	转录本	Pno08G008784t1	Pno08G008784t11288xxPlantKGA_431	Pno08G008784	TN	partial	8	6140686	6146173	+	Pfam	PF01582	TIR domain	Toll/interleukin-1 receptor homology (TIR) domain	19	180	WDVFLSFRGEDTRNNFTERLYTELEANGVRAFRDNDGLTQGDSLDPTLFNAIEDSAASIAIISPQYASSRWCLEELARICECRRLILPVFYRVDPSDVRRQKGPFEDHFQSHEEKFKKKLVLRWRNAMKRVGGISGWVFQGSGEPQLIQTLVKRVLTELSNT	1.1e-35	MLQNDGDSLSAPPALRLLWDVFLSFRGEDTRNNFTERLYTELEANGVRAFRDNDGLTQGDSLDPTLFNAIEDSAASIAIISPQYASSRWCLEELARICECRRLILPVFYRVDPSDVRRQKGPFEDHFQSHEEKFKKKLVLRWRNAMKRVGGISGWVFQGSGEPQLIQTLVKRVLTELSNTPVIVAPYVVGLDSRLGELWRLLDVNSKGIQVLGLHGMGGVGKTTLAKALYNKLVGHFAHRSFISDVRETSAKQNGLVTLQNMLIAHLCPREKPVVDERDGKIAIKRILSGKRVLVVLDDVDDVSQLNGLAARRGWFHEGSLIIVSTRDRELLLLDLVSEIYNVKELDSSDSLKLFSYHALRREKPTEAFLNLSNQIVLLTGGLPLALEVFGSLLFDKRK…	730	5488	https://onlinelibrary.wiley.com/doi/full/10.1111/pbi.13558
PlantKGA_431	Apiales	Araliaceae	Panax	notoginseng	Panax notoginseng		三七	chromosome	Yes	转录本	Pno08G008784t1	Pno08G008784t11288xxPlantKGA_431	Pno08G008784	TN	partial	8	6140686	6146173	+	Pfam	PF00931	NB-ARC domain	NB-ARC	195	412	LGELWRLLDVNSKGIQVLGLHGMGGVGKTTLAKALYNKLVGHFAHRSFISDVRETSAKQNGLVTLQNMLIAHLCPREKPVVDERDGKIAIKRILSGKRVLVVLDDVDDVSQLNGLAARRGWFHEGSLIIVSTRDRELLLLDLVSEIYNVKELDSSDSLKLFSYHALRREKPTEAFLNLSNQIVLLTGGLPLALEVFGSLLFDKRKMKEWEDALQKLKQ	7.8e-30	MLQNDGDSLSAPPALRLLWDVFLSFRGEDTRNNFTERLYTELEANGVRAFRDNDGLTQGDSLDPTLFNAIEDSAASIAIISPQYASSRWCLEELARICECRRLILPVFYRVDPSDVRRQKGPFEDHFQSHEEKFKKKLVLRWRNAMKRVGGISGWVFQGSGEPQLIQTLVKRVLTELSNTPVIVAPYVVGLDSRLGELWRLLDVNSKGIQVLGLHGMGGVGKTTLAKALYNKLVGHFAHRSFISDVRETSAKQNGLVTLQNMLIAHLCPREKPVVDERDGKIAIKRILSGKRVLVVLDDVDDVSQLNGLAARRGWFHEGSLIIVSTRDRELLLLDLVSEIYNVKELDSSDSLKLFSYHALRREKPTEAFLNLSNQIVLLTGGLPLALEVFGSLLFDKRK…	730	5488	https://onlinelibrary.wiley.com/doi/full/10.1111/pbi.13558
PlantKGA_431	Apiales	Araliaceae	Panax	notoginseng	Panax notoginseng		三七	chromosome	Yes	转录本	Pno11G000680t1	Pno11G000680t11288xxPlantKGA_431	Pno11G000680	TN	partial	11	115356254	115368973	-	Pfam	PF00931	NB-ARC domain	NB-ARC	214	322	KLNIGSNDVRFIGIYGMGGIGKTTIAKAIYNIFSHSFESCCILKNVRENSERPNGLVGFQEQLISKVLKKNKKFRVANDDEGATLVKETFCSKRVLIILDDLSKSNQLK	3.7e-10	MAGTSNRINSCTILFPSSSSSLPRRWNVFLSFRGEDTRKNFTDHLYTALDQAGIRAFKDDPELQKGEEISLELLNASQDSNLSIVVFSKNYATSRWCLDELVKILECKKTNGQVVLPVFYDVDPFEVRHQIGSFEKAFGKHKERFMDKVKIWQDALTEAANLSGFHLKNDANGHESKLIQEIVNTVQLQVYPKVLNAVEYLVGINSRIIDLIPKLNIGSNDVRFIGIYGMGGIGKTTIAKAIYNIFSHSFESCCILKNVRENSERPNGLVGFQEQLISKVLKKNKKFRVANDDEGATLVKETFCSKRVLIILDDLSKSNQLKLLAGEMVWPGK	333	12720	https://onlinelibrary.wiley.com/doi/full/10.1111/pbi.13558
PlantKGA_431	Apiales	Araliaceae	Panax	notoginseng	Panax notoginseng		三七	chromosome	Yes	转录本	Pno11G000680t1	Pno11G000680t11288xxPlantKGA_431	Pno11G000680	TN	partial	11	115356254	115368973	-	Pfam	PF01582	TIR domain	Toll/interleukin-1 receptor homology (TIR) domain	27	186	NVFLSFRGEDTRKNFTDHLYTALDQAGIRAFKDDPELQKGEEISLELLNASQDSNLSIVVFSKNYATSRWCLDELVKILECKKTNGQVVLPVFYDVDPFEVRHQIGSFEKAFGKHKERFMDKVKIWQDALTEAANLSGFHLKNDANGHESKLIQEIVNTV	7e-46	MAGTSNRINSCTILFPSSSSSLPRRWNVFLSFRGEDTRKNFTDHLYTALDQAGIRAFKDDPELQKGEEISLELLNASQDSNLSIVVFSKNYATSRWCLDELVKILECKKTNGQVVLPVFYDVDPFEVRHQIGSFEKAFGKHKERFMDKVKIWQDALTEAANLSGFHLKNDANGHESKLIQEIVNTVQLQVYPKVLNAVEYLVGINSRIIDLIPKLNIGSNDVRFIGIYGMGGIGKTTIAKAIYNIFSHSFESCCILKNVRENSERPNGLVGFQEQLISKVLKKNKKFRVANDDEGATLVKETFCSKRVLIILDDLSKSNQLKLLAGEMVWPGK	333	12720	https://onlinelibrary.wiley.com/doi/full/10.1111/pbi.13558
PlantKGA_431	Apiales	Araliaceae	Panax	notoginseng	Panax notoginseng		三七	chromosome	Yes	转录本	Pno11G000857t1	Pno11G000857t11288xxPlantKGA_431	Pno11G000857	TN	partial	11	119011239	119056605	-	Pfam	PF00931	NB-ARC domain	NB-ARC	200	441	SRVEDVYEKISIGSTKFRVIGIHGMGGVGKTTVAKAFYNKYFYHFERSCFLENVREVSQGYNGPLSLVEQLISELLEKRDFKVANVERGVSFLKERVRTKKVLIVLDDLDQSSQLKLLVRYWNFFGPESRIIITTRDTRLLDEFEKINEGYIVMPYMVETLDKDESLELLSYHAFRGTTSTDFRQIFERIVSYTGGLPLALEVLGSFLFRRTNEEWTSTLEKLQQIPNNQIQTILKISYDAL	2.1e-29	MAGTSNKTSSSFPSSSSRRWDVFLSFRGEDIRKTFTDHLYTTLDQAGIQTFKDDPELRKGEEISSALLNAIQDSKMSIVVFSKNYASSRWCLDELVKILECKRTKGQTVHPVFYDIDPSDVRHQLESLAKFIEKYKMRFMDKVKIWRDALAEASNLSGYHLKNDANGHESNLIQKIVKNVLQEVNPKAVIVAEHLVAMDSRVEDVYEKISIGSTKFRVIGIHGMGGVGKTTVAKAFYNKYFYHFERSCFLENVREVSQGYNGPLSLVEQLISELLEKRDFKVANVERGVSFLKERVRTKKVLIVLDDLDQSSQLKLLVRYWNFFGPESRIIITTRDTRLLDEFEKINEGYIVMPYMVETLDKDESLELLSYHAFRGTTSTDFRQIFERIVSYTGGLPLA…	1299	45367	https://onlinelibrary.wiley.com/doi/full/10.1111/pbi.13558
PlantKGA_431	Apiales	Araliaceae	Panax	notoginseng	Panax notoginseng		三七	chromosome	Yes	转录本	Pno11G000857t1	Pno11G000857t11288xxPlantKGA_431	Pno11G000857	TN	partial	11	119011239	119056605	-	Pfam	PF01582	TIR domain	Toll/interleukin-1 receptor homology (TIR) domain	20	186	WDVFLSFRGEDIRKTFTDHLYTTLDQAGIQTFKDDPELRKGEEISSALLNAIQDSKMSIVVFSKNYASSRWCLDELVKILECKRTKGQTVHPVFYDIDPSDVRHQLESLAKFIEKYKMRFMDKVKIWRDALAEASNLSGYHLKNDANGHESNLIQKIVKNVLQEVNP	8.7e-43	MAGTSNKTSSSFPSSSSRRWDVFLSFRGEDIRKTFTDHLYTTLDQAGIQTFKDDPELRKGEEISSALLNAIQDSKMSIVVFSKNYASSRWCLDELVKILECKRTKGQTVHPVFYDIDPSDVRHQLESLAKFIEKYKMRFMDKVKIWRDALAEASNLSGYHLKNDANGHESNLIQKIVKNVLQEVNPKAVIVAEHLVAMDSRVEDVYEKISIGSTKFRVIGIHGMGGVGKTTVAKAFYNKYFYHFERSCFLENVREVSQGYNGPLSLVEQLISELLEKRDFKVANVERGVSFLKERVRTKKVLIVLDDLDQSSQLKLLVRYWNFFGPESRIIITTRDTRLLDEFEKINEGYIVMPYMVETLDKDESLELLSYHAFRGTTSTDFRQIFERIVSYTGGLPLA…	1299	45367	https://onlinelibrary.wiley.com/doi/full/10.1111/pbi.13558
PlantKGA_431	Apiales	Araliaceae	Panax	notoginseng	Panax notoginseng		三七	chromosome	Yes	转录本	Pno12G000316t2	Pno12G000316t21288xxPlantKGA_431	Pno12G000316	TN	partial	12	10758140	10764469	+	Pfam	PF01582	TIR domain	Toll/interleukin-1 receptor homology (TIR) domain	3	167	HLYTAMVQARFRTFRDDDELKRGENIKLELEEAIQRSRVSIVVLSKEYAFSRWCLDELLMILHCRRRFGQLVLPVFYHVDPSEVRKQKGRFEEAFRKYEERLFNVEETDHEMKRERMDKVKRWREALRQVADLAGMDIQNQSNGHESNFIQKIVKVIADKLNHTA	6.6e-35	MDHLYTAMVQARFRTFRDDDELKRGENIKLELEEAIQRSRVSIVVLSKEYAFSRWCLDELLMILHCRRRFGQLVLPVFYHVDPSEVRKQKGRFEEAFRKYEERLFNVEETDHEMKRERMDKVKRWREALRQVADLAGMDIQNQSNGHESNFIQKIVKVIADKLNHTALDLTCHPVGIHSRAESINLWVQDESASVNIYVIYGMGGIGKTTIAKYIYNLNSRGFGCKSFLANIRETSEQPNGLLGLQKQILSEILKLRKIKVYNVDEGTAMIKDAMSCEKVFLVLDDVNDVNQLDALLGTRKFYPGSKIIITTRDKWLLKAHEVHKVYAVEKLDDHESLELFTQHAFGQDHPLEGYVELSNRVVQHCGGLPLAHKVLGSSLSGKSVDVWESELKKLEAIP…	1185	6330	https://onlinelibrary.wiley.com/doi/full/10.1111/pbi.13558
PlantKGA_431	Apiales	Araliaceae	Panax	notoginseng	Panax notoginseng		三七	chromosome	Yes	转录本	Pno12G000316t2	Pno12G000316t21288xxPlantKGA_431	Pno12G000316	TN	partial	12	10758140	10764469	+	Pfam	PF00931	NB-ARC domain	NB-ARC	194	398	SVNIYVIYGMGGIGKTTIAKYIYNLNSRGFGCKSFLANIRETSEQPNGLLGLQKQILSEILKLRKIKVYNVDEGTAMIKDAMSCEKVFLVLDDVNDVNQLDALLGTRKFYPGSKIIITTRDKWLLKAHEVHKVYAVEKLDDHESLELFTQHAFGQDHPLEGYVELSNRVVQHCGGLPLAHKVLGSSLSGKSVDVWESELKKLEAI	2.7e-25	MDHLYTAMVQARFRTFRDDDELKRGENIKLELEEAIQRSRVSIVVLSKEYAFSRWCLDELLMILHCRRRFGQLVLPVFYHVDPSEVRKQKGRFEEAFRKYEERLFNVEETDHEMKRERMDKVKRWREALRQVADLAGMDIQNQSNGHESNFIQKIVKVIADKLNHTALDLTCHPVGIHSRAESINLWVQDESASVNIYVIYGMGGIGKTTIAKYIYNLNSRGFGCKSFLANIRETSEQPNGLLGLQKQILSEILKLRKIKVYNVDEGTAMIKDAMSCEKVFLVLDDVNDVNQLDALLGTRKFYPGSKIIITTRDKWLLKAHEVHKVYAVEKLDDHESLELFTQHAFGQDHPLEGYVELSNRVVQHCGGLPLAHKVLGSSLSGKSVDVWESELKKLEAIP…	1185	6330	https://onlinelibrary.wiley.com/doi/full/10.1111/pbi.13558
PlantKGA_431	Apiales	Araliaceae	Panax	notoginseng	Panax notoginseng		三七	chromosome	Yes	转录本	Pno12G003751t1	Pno12G003751t11288xxPlantKGA_431	Pno12G003751	TN	partial	12	32336293	32346894	-	Pfam	PF00931	NB-ARC domain	NB-ARC	188	283	KINSRRRIVMTGKNNGWTRYKQLLKGHKVYKEHELKNFDVNESLELFCWFAFGQSLPLEGYLELSRSVLSYCGGLPLALHVLGSSLYGETVDMTTK	1.5e-06	MAKWRVITRIQLGFKKFERSEKKFKDILELIKKVGFSECLKADTPVYTELVKQFYSNASMDSGLLTTKVKGESLKIRASDINQCLGFSNQGLINMDEVDIEEGKRLMWYQKAKTLVRLSPLVQAGFRTFKDDIEIKRGGNIKSELRKAVQQSRVSIIVFSKDYASSKWCLDVLKMILDCRRTSEQDKKINSRRRIVMTGKNNGWTRYKQLLKGHKVYKEHELKNFDVNESLELFCWFAFGQSLPLEGYLELSRSVLSYCGGLPLALHVLGSSLYGETVDMTTKEIYSSKSLVSFLERRKVILNECDFHNTVGLENLINRSLLAIDKNNKITMHQLLRDTGREIISQESPNKPGKLSRLWHHKDSFNVSKQKTYLKMASENVENSNGAQATVDSPHINNQ…	574	10602	https://onlinelibrary.wiley.com/doi/full/10.1111/pbi.13558
PlantKGA_431	Apiales	Araliaceae	Panax	notoginseng	Panax notoginseng		三七	chromosome	Yes	转录本	Pno12G003751t1	Pno12G003751t11288xxPlantKGA_431	Pno12G003751	TN	partial	12	32336293	32346894	-	Pfam	PF01582	TIR domain	Toll/interleukin-1 receptor homology (TIR) domain	122	184	VQAGFRTFKDDIEIKRGGNIKSELRKAVQQSRVSIIVFSKDYASSKWCLDVLKMILDCRRTSE	8e-17	MAKWRVITRIQLGFKKFERSEKKFKDILELIKKVGFSECLKADTPVYTELVKQFYSNASMDSGLLTTKVKGESLKIRASDINQCLGFSNQGLINMDEVDIEEGKRLMWYQKAKTLVRLSPLVQAGFRTFKDDIEIKRGGNIKSELRKAVQQSRVSIIVFSKDYASSKWCLDVLKMILDCRRTSEQDKKINSRRRIVMTGKNNGWTRYKQLLKGHKVYKEHELKNFDVNESLELFCWFAFGQSLPLEGYLELSRSVLSYCGGLPLALHVLGSSLYGETVDMTTKEIYSSKSLVSFLERRKVILNECDFHNTVGLENLINRSLLAIDKNNKITMHQLLRDTGREIISQESPNKPGKLSRLWHHKDSFNVSKQKTYLKMASENVENSNGAQATVDSPHINNQ…	574	10602	https://onlinelibrary.wiley.com/doi/full/10.1111/pbi.13558
PlantKGA_431	Apiales	Araliaceae	Panax	notoginseng	Panax notoginseng		三七	chromosome	Yes	转录本	Pno12G004173t1	Pno12G004173t11288xxPlantKGA_431	Pno12G004173	TN	partial	12	34830647	34837075	+	Pfam	PF01582	TIR domain	Toll/interleukin-1 receptor homology (TIR) domain	41	139	TWCLDELVRILECKKTTGQYILPVFYEVEPSQVRHQTGSFGAAFTKHRECFMDKVARWKAALSEVADSAGMIIQNGYESKFIKKIVQVVEEKLKRTTLS	5.5e-21	MASSSTSRFGYQVFLSFRGKDKRRTFIDHLYTALDDAGIRTWCLDELVRILECKKTTGQYILPVFYEVEPSQVRHQTGSFGAAFTKHRECFMDKVARWKAALSEVADSAGMIIQNGYESKFIKKIVQVVEEKLKRTTLSVPHYLIGTGDRVRNINKWLQDDSSEVSVLTIYGTGGIGKTTIAKLAYNLNYRRFEASSFLPNVRETLKQSEGLLRLYRKLLSHMLKRDKVKIDSLDEGINKIKDVISCKRVLLVIDDVDQKNRLELDPLLGLHYLFCQGSKILLTTRHRQLLKGHKVCKEHQLQKFDFNESLELFSWHAFGQDFPLEEYLELSRKVVSYCEGLPLALHVLGSSLYGESVDVWKSTLRKLEEIPNSDILKILIVSYDSLPDDHDKKLFLEI…	964	6429	https://onlinelibrary.wiley.com/doi/full/10.1111/pbi.13558
PlantKGA_431	Apiales	Araliaceae	Panax	notoginseng	Panax notoginseng		三七	chromosome	Yes	转录本	Pno12G004173t1	Pno12G004173t11288xxPlantKGA_431	Pno12G004173	TN	partial	12	34830647	34837075	+	Pfam	PF00931	NB-ARC domain	NB-ARC	150	374	RVRNINKWLQDDSSEVSVLTIYGTGGIGKTTIAKLAYNLNYRRFEASSFLPNVRETLKQSEGLLRLYRKLLSHMLKRDKVKIDSLDEGINKIKDVISCKRVLLVIDDVDQKNRLELDPLLGLHYLFCQGSKILLTTRHRQLLKGHKVCKEHQLQKFDFNESLELFSWHAFGQDFPLEEYLELSRKVVSYCEGLPLALHVLGSSLYGESVDVWKSTLRKLEEIPNS	4.1e-28	MASSSTSRFGYQVFLSFRGKDKRRTFIDHLYTALDDAGIRTWCLDELVRILECKKTTGQYILPVFYEVEPSQVRHQTGSFGAAFTKHRECFMDKVARWKAALSEVADSAGMIIQNGYESKFIKKIVQVVEEKLKRTTLSVPHYLIGTGDRVRNINKWLQDDSSEVSVLTIYGTGGIGKTTIAKLAYNLNYRRFEASSFLPNVRETLKQSEGLLRLYRKLLSHMLKRDKVKIDSLDEGINKIKDVISCKRVLLVIDDVDQKNRLELDPLLGLHYLFCQGSKILLTTRHRQLLKGHKVCKEHQLQKFDFNESLELFSWHAFGQDFPLEEYLELSRKVVSYCEGLPLALHVLGSSLYGESVDVWKSTLRKLEEIPNSDILKILIVSYDSLPDDHDKKLFLEI…	964	6429	https://onlinelibrary.wiley.com/doi/full/10.1111/pbi.13558
PlantKGA_431	Apiales	Araliaceae	Panax	notoginseng	Panax notoginseng		三七	chromosome	Yes	转录本	Pno13G000833t1	Pno13G000833t11288xxPlantKGA_431	Pno13G000833	TN	partial	13	27461683	27468080	-	Pfam	PF01582	TIR domain	Toll/interleukin-1 receptor homology (TIR) domain	17	132	HDVFLSFRGPDTRNNFTSHLYDALTRSGIRTFMDDEELRRGKEIKPELRKAIRRSRMSIIVFSENYASSRWCLDELVEILECKRTNGQIVLPIFYDVQPSIVRHQSGSYAKAFENF	1.2e-41	MASTSNQTDSSTPHCDHDVFLSFRGPDTRNNFTSHLYDALTRSGIRTFMDDEELRRGKEIKPELRKAIRRSRMSIIVFSENYASSRWCLDELVEILECKRTNGQIVLPIFYDVQPSIVRHQSGSYAKAFENFMEDCGPWKMLLISCLSSCIIRGWGFAKPFENNRLAEWRAALTEAANISGYDLKNEENGNEARFIEKIVRNVRPEVNLRCLNVPEYLIGVDSHVNCINMLLSIGTNDVRKIGICGMGGIGKTTISKSVYNKHLNHFEGSAFVENIKDVSKQPDGLLCLQKNLLNQLEKKNVKLSNSDEGINWIKNICCSRRVLILLDDLDDLNQVNQLAGQKSWFSTGSRVIMITRDAKLLKEAQVDHTYEMKVLDEDKSVELFRRHAIGEETPSEDH…	1210	6398	https://onlinelibrary.wiley.com/doi/full/10.1111/pbi.13558
PlantKGA_431	Apiales	Araliaceae	Panax	notoginseng	Panax notoginseng		三七	chromosome	Yes	转录本	Pno13G000833t1	Pno13G000833t11288xxPlantKGA_431	Pno13G000833	TN	partial	13	27461683	27468080	-	Pfam	PF00931	NB-ARC domain	NB-ARC	231	457	LLSIGTNDVRKIGICGMGGIGKTTISKSVYNKHLNHFEGSAFVENIKDVSKQPDGLLCLQKNLLNQLEKKNVKLSNSDEGINWIKNICCSRRVLILLDDLDDLNQVNQLAGQKSWFSTGSRVIMITRDAKLLKEAQVDHTYEMKVLDEDKSVELFRRHAIGEETPSEDHISLSIDIARYCGGLPLALEVIGSHLRRENLTYWKNALKEFQSKPHKTIQDQLKISYDA	6.9e-30	MASTSNQTDSSTPHCDHDVFLSFRGPDTRNNFTSHLYDALTRSGIRTFMDDEELRRGKEIKPELRKAIRRSRMSIIVFSENYASSRWCLDELVEILECKRTNGQIVLPIFYDVQPSIVRHQSGSYAKAFENFMEDCGPWKMLLISCLSSCIIRGWGFAKPFENNRLAEWRAALTEAANISGYDLKNEENGNEARFIEKIVRNVRPEVNLRCLNVPEYLIGVDSHVNCINMLLSIGTNDVRKIGICGMGGIGKTTISKSVYNKHLNHFEGSAFVENIKDVSKQPDGLLCLQKNLLNQLEKKNVKLSNSDEGINWIKNICCSRRVLILLDDLDDLNQVNQLAGQKSWFSTGSRVIMITRDAKLLKEAQVDHTYEMKVLDEDKSVELFRRHAIGEETPSEDH…	1210	6398	https://onlinelibrary.wiley.com/doi/full/10.1111/pbi.13558
PlantKGA_431	Apiales	Araliaceae	Panax	notoginseng	Panax notoginseng		三七	chromosome	Yes	转录本	Pno13G000875t1	Pno13G000875t11288xxPlantKGA_431	Pno13G000875	TN	partial	13	28284059	28290380	+	Pfam	PF01582	TIR domain	Toll/interleukin-1 receptor homology (TIR) domain	21	146	HDVFLSFRGTDTRKTFTGHLYTALKQAGIRPFMDDEELPTGKEIKHELKKAIRESKMYIIVFSENYASSRWCLDELVEILECKNTMGRLVIPLFYHVDPSVVRYQTGSYAEAFQHFVAVLEKRPTV	3.3e-40	MAFTINQTNYSCSSSSTHWNHDVFLSFRGTDTRKTFTGHLYTALKQAGIRPFMDDEELPTGKEIKHELKKAIRESKMYIIVFSENYASSRWCLDELVEILECKNTMGRLVIPLFYHVDPSVVRYQTGSYAEAFQHFVAVLEKRPTVENLFNSWWLSWISRKWKSGSFVTDLELKKMDKWRAALTEAADLSGHDLRTEENGNESRLIQKIVTKVLPQVIPGCLILPDNPVGIGSRVKYVNQLLSIESNDVRTIGIYGMGGIGKTTISKAVFNENLHHFEGSSFVENIKDASKLPDGLVRLQEKLLFQLAKRDVKVSSVDHGIEFINRIFHSKRVLILLDDLDDLIQVKSLAPFAGQRCFSSGSRVIMTTRDIQLLKQVQVDEKYEVKELDVNESLELFSW…	1300	6322	https://onlinelibrary.wiley.com/doi/full/10.1111/pbi.13558
PlantKGA_431	Apiales	Araliaceae	Panax	notoginseng	Panax notoginseng		三七	chromosome	Yes	转录本	Pno13G000875t1	Pno13G000875t11288xxPlantKGA_431	Pno13G000875	TN	partial	13	28284059	28290380	+	Pfam	PF00931	NB-ARC domain	NB-ARC	239	457	NQLLSIESNDVRTIGIYGMGGIGKTTISKAVFNENLHHFEGSSFVENIKDASKLPDGLVRLQEKLLFQLAKRDVKVSSVDHGIEFINRIFHSKRVLILLDDLDDLIQVKSLAPFAGQRCFSSGSRVIMTTRDIQLLKQVQVDEKYEVKELDVNESLELFSWHAFRRVIPTEDYHLISKGIVRYAKGLPLVLEVIGSYLVQKTTKEWESTLNRLRQIPDK	1e-28	MAFTINQTNYSCSSSSTHWNHDVFLSFRGTDTRKTFTGHLYTALKQAGIRPFMDDEELPTGKEIKHELKKAIRESKMYIIVFSENYASSRWCLDELVEILECKNTMGRLVIPLFYHVDPSVVRYQTGSYAEAFQHFVAVLEKRPTVENLFNSWWLSWISRKWKSGSFVTDLELKKMDKWRAALTEAADLSGHDLRTEENGNESRLIQKIVTKVLPQVIPGCLILPDNPVGIGSRVKYVNQLLSIESNDVRTIGIYGMGGIGKTTISKAVFNENLHHFEGSSFVENIKDASKLPDGLVRLQEKLLFQLAKRDVKVSSVDHGIEFINRIFHSKRVLILLDDLDDLIQVKSLAPFAGQRCFSSGSRVIMTTRDIQLLKQVQVDEKYEVKELDVNESLELFSW…	1300	6322	https://onlinelibrary.wiley.com/doi/full/10.1111/pbi.13558
PlantKGA_431	Apiales	Araliaceae	Panax	notoginseng	Panax notoginseng		三七	chromosome	Yes	转录本	Pno13G000879t1	Pno13G000879t11288xxPlantKGA_431	Pno13G000879	TN	partial	13	28362254	28366995	+	Pfam	PF01582	TIR domain	Toll/interleukin-1 receptor homology (TIR) domain	27	185	HHVFLSFRGTDTRNNFTSHLYTALKQAGIKTFIDDEELPTGKEIKPELRKAIRESRMSIIVFSKNYASSRWCLDELVEILECKRTMGQLVLPLFYDVEPSVVRHQTGSYAEAFQHFDDESDKPKVKNWRAALKEAADLSGHVLADGNEARFIEKIVGKV	1.5e-48	MSMASTSNQVTSSCFPSSSSTPHSWNHHVFLSFRGTDTRNNFTSHLYTALKQAGIKTFIDDEELPTGKEIKPELRKAIRESRMSIIVFSKNYASSRWCLDELVEILECKRTMGQLVLPLFYDVEPSVVRHQTGSYAEAFQHFDDESDKPKVKNWRAALKEAADLSGHVLADGNEARFIEKIVGKVQPEVNLRFLNVPDSLIRLDSNFNGINTLLSIGSDDVRLIGIYGMGGIGKTTVSKYVYNKHLNHFEGSAFVENIKDVSKLPDGLRRLQKDLLSQLQKRKSIKPSNSDEGINWIKNICCSRRVLILLDDLDHLNQINQLAGQKSWFNTGSRIIMVTRDAKLLKEAHIDHTYEMNVLDEDESLELFRRHAFGEGIPFPSEYHKSLSIETTTYCGGLP…	1149	4742	https://onlinelibrary.wiley.com/doi/full/10.1111/pbi.13558
PlantKGA_431	Apiales	Araliaceae	Panax	notoginseng	Panax notoginseng		三七	chromosome	Yes	转录本	Pno13G000879t1	Pno13G000879t11288xxPlantKGA_431	Pno13G000879	TN	partial	13	28362254	28366995	+	Pfam	PF00931	NB-ARC domain	NB-ARC	212	430	TLLSIGSDDVRLIGIYGMGGIGKTTVSKYVYNKHLNHFEGSAFVENIKDVSKLPDGLRRLQKDLLSQLQKRKSIKPSNSDEGINWIKNICCSRRVLILLDDLDHLNQINQLAGQKSWFNTGSRIIMVTRDAKLLKEAHIDHTYEMNVLDEDESLELFRRHAFGEGIPFPSEYHKSLSIETTTYCGGLPLALEVIGRHMYGLTLWKWKIALEEFRNYPEK	2.1e-26	MSMASTSNQVTSSCFPSSSSTPHSWNHHVFLSFRGTDTRNNFTSHLYTALKQAGIKTFIDDEELPTGKEIKPELRKAIRESRMSIIVFSKNYASSRWCLDELVEILECKRTMGQLVLPLFYDVEPSVVRHQTGSYAEAFQHFDDESDKPKVKNWRAALKEAADLSGHVLADGNEARFIEKIVGKVQPEVNLRFLNVPDSLIRLDSNFNGINTLLSIGSDDVRLIGIYGMGGIGKTTVSKYVYNKHLNHFEGSAFVENIKDVSKLPDGLRRLQKDLLSQLQKRKSIKPSNSDEGINWIKNICCSRRVLILLDDLDHLNQINQLAGQKSWFNTGSRIIMVTRDAKLLKEAHIDHTYEMNVLDEDESLELFRRHAFGEGIPFPSEYHKSLSIETTTYCGGLP…	1149	4742	https://onlinelibrary.wiley.com/doi/full/10.1111/pbi.13558
PlantKGA_431	Apiales	Araliaceae	Panax	notoginseng	Panax notoginseng		三七	chromosome	Yes	转录本	Pno01G000335t1	Pno01G000335t11288xxPlantKGA_431	Pno01G000335	L	partial	1	10913513	10915326	+	Pfam	PF13855	Leucine rich repeat	Leucine-rich repeat	221	280	NLVVLDLSYNSLTTSIPDTIGQMGMLQKLDLSSNFLTGSLPNSIEKLNSLVFMALSNNRF	1.9e-08	MHCSFSLSLPLLMLLIPFLSIPCVSSTTNQQHAKKNLQPNNMEPSELETLFKIMDTMSSDQTWRISHPNPCKPGSSWIGIECKPGIDNHLHVTRLDFGTPPNPTCKIKSIFPSQIFDLPYLQSAFFSQCFTRTKTTLTISQNRFFNSKLQQLSLRSNPAIIGSIPPQISSLKSLQILTLSQNRLTGKIPKEICRLTSLQHLDLSYNFLSGTVPNQLGSLKNLVVLDLSYNSLTTSIPDTIGQMGMLQKLDLSSNFLTGSLPNSIEKLNSLVFMALSNNRFKGKIPKGLAKLQSLQYFIMDDNPMFILLPEEFGHLQKLQELRLANSGYSGTIPPTFSQLQNLSTLSLQNNRLTGEIPVGFGNLSYMYHLNLSRNLLGGMVPFTSSFLQRLGKNLDLSGN…	458	1814	https://onlinelibrary.wiley.com/doi/full/10.1111/pbi.13558
PlantKGA_431	Apiales	Araliaceae	Panax	notoginseng	Panax notoginseng		三七	chromosome	Yes	转录本	Pno01G000335t1	Pno01G000335t11288xxPlantKGA_431	Pno01G000335	L	partial	1	10913513	10915326	+	Pfam	PF13855	Leucine rich repeat	Leucine-rich repeat	148	206	KLQQLSLRSNPAIIGSIPPQISSLKSLQILTLSQNRLTGKIPKEICRLTSLQHLDLSYN	1e-09	MHCSFSLSLPLLMLLIPFLSIPCVSSTTNQQHAKKNLQPNNMEPSELETLFKIMDTMSSDQTWRISHPNPCKPGSSWIGIECKPGIDNHLHVTRLDFGTPPNPTCKIKSIFPSQIFDLPYLQSAFFSQCFTRTKTTLTISQNRFFNSKLQQLSLRSNPAIIGSIPPQISSLKSLQILTLSQNRLTGKIPKEICRLTSLQHLDLSYNFLSGTVPNQLGSLKNLVVLDLSYNSLTTSIPDTIGQMGMLQKLDLSSNFLTGSLPNSIEKLNSLVFMALSNNRFKGKIPKGLAKLQSLQYFIMDDNPMFILLPEEFGHLQKLQELRLANSGYSGTIPPTFSQLQNLSTLSLQNNRLTGEIPVGFGNLSYMYHLNLSRNLLGGMVPFTSSFLQRLGKNLDLSGN…	458	1814	https://onlinelibrary.wiley.com/doi/full/10.1111/pbi.13558
PlantKGA_431	Apiales	Araliaceae	Panax	notoginseng	Panax notoginseng		三七	chromosome	Yes	转录本	Pno01G000358t1	Pno01G000358t11288xxPlantKGA_431	Pno01G000358	L	partial	1	109726012	109727756	-	Pfam	PF13855	Leucine rich repeat	Leucine-rich repeat	28	87	KLSVLTLQYNRLAGQIPSSIGNMSMLKRLDLSFNHLSGRIPDKLANAPLLEVLDVQNNSL	5.4e-07	MAWFFFFLELCCNQLSGSIPTEIGYLKKLSVLTLQYNRLAGQIPSSIGNMSMLKRLDLSFNHLSGRIPDKLANAPLLEVLDVQNNSLSGVVPPVCNSWDDLSINQIEPFSPTRNSTSPKHVPMNAKFHTNCNQTHCSKSSKLPQMVIVSGVITASITLMVVGFLCVFRYRRHKQKIAITSDHTSDDRLSVNENKDFYSRSASPLVTLEYSNKWDPMVSYQIGSDDSDKFLQRFKFNLEEVESATQDFEGCISVVAIKSINVISCKSEEAEFMNGLRGECFLIFDFASKGTLSLYLDLEDGSSHILDWQTQISIINGIAKG	320	1745	https://onlinelibrary.wiley.com/doi/full/10.1111/pbi.13558
PlantKGA_431	Apiales	Araliaceae	Panax	notoginseng	Panax notoginseng		三七	chromosome	Yes	转录本	Pno01G000822t1	Pno01G000822t11288xxPlantKGA_431	Pno01G000822	L	partial	1	12264727	12266170	+	Pfam	PF13855	Leucine rich repeat	Leucine-rich repeat	235	293	SLEELLLINNNISGCLPPEVGFLYKLKVLDLSFNKLVGPIPYSIAGLAHLEQLNLGHNM	5.2e-08	MASFSSSITTSALILLLLHLSSSSAKHGQRHHSQYSHITNTRLQQAYIAFQAWKTVIYSDPSNFTSNWIGPNVCNYRGVYCTAFPNNTKTQVVAGIDLNHCDIAGFLPEELGLLVDLAILHLNTNRFCGILPQTLSNLTLLYELDLSNNRFVGPFPSVVLSMPSLNYLDVRYNDFEGPLPPVLFSRNLDAIFVNNNRFTNAIPSNLGTTTASVVVFANNNFGGCIPPSIVNFADSLEELLLINNNISGCLPPEVGFLYKLKVLDLSFNKLVGPIPYSIAGLAHLEQLNLGHNMMSENVPEGICILPRLANFTFSYNYFCEEEGICSNLTSKGIVFDDRRNCLPDKPLQRSKKECEAVLKHPVDCYI	366	1444	https://onlinelibrary.wiley.com/doi/full/10.1111/pbi.13558
PlantKGA_431	Apiales	Araliaceae	Panax	notoginseng	Panax notoginseng		三七	chromosome	Yes	转录本	Pno01G000822t1	Pno01G000822t11288xxPlantKGA_431	Pno01G000822	L	partial	1	12264727	12266170	+	Pfam	PF13855	Leucine rich repeat	Leucine-rich repeat	117	175	LAILHLNTNRFCGILPQTLSNLTLLYELDLSNNRFVGPFPSVVLSMPSLNYLDVRYNDF	2.1e-06	MASFSSSITTSALILLLLHLSSSSAKHGQRHHSQYSHITNTRLQQAYIAFQAWKTVIYSDPSNFTSNWIGPNVCNYRGVYCTAFPNNTKTQVVAGIDLNHCDIAGFLPEELGLLVDLAILHLNTNRFCGILPQTLSNLTLLYELDLSNNRFVGPFPSVVLSMPSLNYLDVRYNDFEGPLPPVLFSRNLDAIFVNNNRFTNAIPSNLGTTTASVVVFANNNFGGCIPPSIVNFADSLEELLLINNNISGCLPPEVGFLYKLKVLDLSFNKLVGPIPYSIAGLAHLEQLNLGHNMMSENVPEGICILPRLANFTFSYNYFCEEEGICSNLTSKGIVFDDRRNCLPDKPLQRSKKECEAVLKHPVDCYI	366	1444	https://onlinelibrary.wiley.com/doi/full/10.1111/pbi.13558
PlantKGA_431	Apiales	Araliaceae	Panax	notoginseng	Panax notoginseng		三七	chromosome	Yes	转录本	Pno01G001362t2	Pno01G001362t21288xxPlantKGA_431	Pno01G001362	L	partial	1	13655351	13665608	-	Pfam	PF13855	Leucine rich repeat	Leucine-rich repeat	398	453	SLKALNISGNSIVRITAGTLPRGLHSLNLSKNNISTIEGIRGLTRLRVLHLSYNRI	1.8e-09	MHKALVDQSNNQGSKDFTNSSGASPLLLKAHDDIMYITVNKVTSSSSVEHNWKSDIKMKYNTESDVEVNKTRMKKSQSLGSGLDWKGRVSGGNDSEDETEQGFSGDESHDQSDSVISVGDKDPEVNPFGQSPDVLLCVSLQVSSDMVNNESIFSIGDLQQPEKGGCENSDTQFSGKCTGESSNHTPHVISKSFSLPNIVSFGGRLTSVNVVPHATSCEDLKVLDLKRKEMLVYKVGRLVNLDEGRDDSVKNNEKTCMENPADDGCNSYKSVGSVKDWIIPVMDEVNTVKTPQAESAVRHWDELPSKDFRIKRIEEWVMDLQHCSPLEEKYELSTSSYHKADVGGTVMDGLTTARQDGKITPGMEAAKKNISSLSATATAAQMANHGLVVIPFLSAFVSL…	477	10258	https://onlinelibrary.wiley.com/doi/full/10.1111/pbi.13558
PlantKGA_431	Apiales	Araliaceae	Panax	notoginseng	Panax notoginseng		三七	chromosome	Yes	转录本	Pno01G002207t1	Pno01G002207t11288xxPlantKGA_431	Pno01G002207	L	partial	1	156285912	156293651	-	Pfam	PF13516	Leucine Rich repeat	Leucine-rich repeat	98	111	PNLKTLDLARNELT	1.6	MPDGHGLRSRTRDSFSWAFRKKGTIHLSTYLRTYHIGDYVNIRVNDTIHKGIHQKFYHGRTGQVWNVTKRAIGVEANKQNLKNNQLTCPIPLTLTQIPNLKTLDLARNELTVSYSDVRQNKLTRPIPNIIGNRTSFEILSLQGNKLTGKIPKVIGLMQALAVLDLSENELIGSIPPILGNLSYTMNLYLHGNKLTRPIPPELGNMSKLSYLNLANNNLEGPIPQNVSSCTALNQFNVHGNFLNGSIPLSFRNLESLTYMNLSSNEFKGGIPVEFGRIINLDTLNISYNNFSGVIPPSRNLPCCAQSKTLPSIP	313	7740	https://onlinelibrary.wiley.com/doi/full/10.1111/pbi.13558
PlantKGA_431	Apiales	Araliaceae	Panax	notoginseng	Panax notoginseng		三七	chromosome	Yes	转录本	Pno01G002552t1	Pno01G002552t11288xxPlantKGA_431	Pno01G002552	L	partial	1	163746012	163747085	+	Pfam	PF00560	Leucine Rich Repeat	Leucine-rich repeat	120	137	QLRYLDLGNNNFSGSIPD	0.61	MSAATTLRPNIHFFSLLSILSLFSIANSDELQLLLTIKIAFKNSNTDIFDSWESNKSVCNFRGITCNEMSLVKKIELTNQHLSGSVPFDSICQLKSLEKLSLGANTLVGSVTEDLNNCTQLRYLDLGNNNFSGSIPDISSLGGLSVLYLNKSGFSGIFPWNSLKNMTTLTVLSLGDNLFGRSPFPNQILKLKKLNWMYLTDCSIEGKIPPEIGNLTELINLELSGNFLTGEIPAEISNIRNLWQLELYNNQLTGKIPPGFGKLSNLQNFDASTNFLEGDISELRFLTQLVSLQLFENELSGEMPPEFGEFKKLADLSLYTNKFTGSLPPNLGSWADFFFFFFNFPRPPPPPNFGKHY	357	1074	https://onlinelibrary.wiley.com/doi/full/10.1111/pbi.13558
PlantKGA_431	Apiales	Araliaceae	Panax	notoginseng	Panax notoginseng		三七	chromosome	Yes	转录本	Pno01G002552t1	Pno01G002552t11288xxPlantKGA_431	Pno01G002552	L	partial	1	163746012	163747085	+	Pfam	PF08263	Leucine rich repeat N-terminal domain	Leucine-rich repeat-containing N-terminal, plant-type	28	67	SDELQLLLTIKIAFKNSNTDIFDSWESNKSVCNFRGITCN	3.7e-07	MSAATTLRPNIHFFSLLSILSLFSIANSDELQLLLTIKIAFKNSNTDIFDSWESNKSVCNFRGITCNEMSLVKKIELTNQHLSGSVPFDSICQLKSLEKLSLGANTLVGSVTEDLNNCTQLRYLDLGNNNFSGSIPDISSLGGLSVLYLNKSGFSGIFPWNSLKNMTTLTVLSLGDNLFGRSPFPNQILKLKKLNWMYLTDCSIEGKIPPEIGNLTELINLELSGNFLTGEIPAEISNIRNLWQLELYNNQLTGKIPPGFGKLSNLQNFDASTNFLEGDISELRFLTQLVSLQLFENELSGEMPPEFGEFKKLADLSLYTNKFTGSLPPNLGSWADFFFFFFNFPRPPPPPNFGKHY	357	1074	https://onlinelibrary.wiley.com/doi/full/10.1111/pbi.13558
PlantKGA_431	Apiales	Araliaceae	Panax	notoginseng	Panax notoginseng		三七	chromosome	Yes	转录本	Pno01G003259t1	Pno01G003259t11288xxPlantKGA_431	Pno01G003259	L	partial	1	18158900	18162730	+	Pfam	PF13855	Leucine rich repeat	Leucine-rich repeat	60	116	RKLDLSNNSLQSIPESLTARLLNVVMLDVHSNQLKALPNSIGCLSKLKVFNVSGNHL	5.4e-09	MMYEQQQQVRMDLIRRSKSMSMPAIQQQEAEKPHEFDVLDLSGMSLDSLPNPSINLGLIRKLDLSNNSLQSIPESLTARLLNVVMLDVHSNQLKALPNSIGCLSKLKVFNVSGNHLQSFPKTIENCSSLEELNANFNMLTRLPETLGFELVNLKKLSVNSNKLLFLPSSTSHLTNLCILDARLNCLRSLPDDLENLINLQILNVSQNFHHLETLPYSIGLLISLVELDVSYNKIATLPDSIGCLKRLQKLCVEGNPLVSPPTDVVEQGLYKVKEYLSEKMNGGHKTTSPKKKSWIGKLKKYGTFNGANNIRVNVHDQEIRQGFIPTDYNQIETLASPRYTGMFSPRRLFSPKTYFTR	357	3831	https://onlinelibrary.wiley.com/doi/full/10.1111/pbi.13558
PlantKGA_431	Apiales	Araliaceae	Panax	notoginseng	Panax notoginseng		三七	chromosome	Yes	转录本	Pno01G004624t1	Pno01G004624t11288xxPlantKGA_431	Pno01G004624	L	partial	1	21031923	21033509	+	Pfam	PF13855	Leucine rich repeat	Leucine-rich repeat	158	219	RELRFLLLWSNQLVGQVPQALSNSSKLKWLDLESNALSGPLPSEIVQKMPMLQFLYLSYNNF	8e-08	MSGVVSDPKNTLESWNSPWIHVCNWSGIGCNINRTRVIELDLSGLSLRGTILPAISNLSYLKILDLSGNFFQSHIPAELGSLSRLKQLSLSRNLLEGTIPTELGFLGELVYLDLGSNRLTGEIPMSLFCNGTSSLEYIDLSNNSISGNIPLKMQCELRELRFLLLWSNQLVGQVPQALSNSSKLKWLDLESNALSGPLPSEIVQKMPMLQFLYLSYNNFSSHNGNTDLKPFFSSLVNSTNLQELELAGNNLGGDIPSIIGDLSTTLVQIHLDDNLIYGSIPPHISKLVNLTLLNLSSNLINGSIPRELCRMRKLERLYLSNNSLSGDIPSTFGDVPHLGLLDLSKNKLSGSIPDSFANLSQLRRLLLYENQLSGTIPPSLGKCVNLEILDLSCNKISGV…	528	1587	https://onlinelibrary.wiley.com/doi/full/10.1111/pbi.13558
PlantKGA_431	Apiales	Araliaceae	Panax	notoginseng	Panax notoginseng		三七	chromosome	Yes	转录本	Pno01G004624t1	Pno01G004624t11288xxPlantKGA_431	Pno01G004624	L	partial	1	21031923	21033509	+	Pfam	PF13855	Leucine rich repeat	Leucine-rich repeat	438	493	IDISSNNLSGAIPSQLGSCVALEYLNLSGNFLESSLPESIGQLPYLKELDVSFNHL	3.1e-08	MSGVVSDPKNTLESWNSPWIHVCNWSGIGCNINRTRVIELDLSGLSLRGTILPAISNLSYLKILDLSGNFFQSHIPAELGSLSRLKQLSLSRNLLEGTIPTELGFLGELVYLDLGSNRLTGEIPMSLFCNGTSSLEYIDLSNNSISGNIPLKMQCELRELRFLLLWSNQLVGQVPQALSNSSKLKWLDLESNALSGPLPSEIVQKMPMLQFLYLSYNNFSSHNGNTDLKPFFSSLVNSTNLQELELAGNNLGGDIPSIIGDLSTTLVQIHLDDNLIYGSIPPHISKLVNLTLLNLSSNLINGSIPRELCRMRKLERLYLSNNSLSGDIPSTFGDVPHLGLLDLSKNKLSGSIPDSFANLSQLRRLLLYENQLSGTIPPSLGKCVNLEILDLSCNKISGV…	528	1587	https://onlinelibrary.wiley.com/doi/full/10.1111/pbi.13558
PlantKGA_431	Apiales	Araliaceae	Panax	notoginseng	Panax notoginseng		三七	chromosome	Yes	转录本	Pno01G004624t1	Pno01G004624t11288xxPlantKGA_431	Pno01G004624	L	partial	1	21031923	21033509	+	Pfam	PF13855	Leucine rich repeat	Leucine-rich repeat	60	119	YLKILDLSGNFFQSHIPAELGSLSRLKQLSLSRNLLEGTIPTELGFLGELVYLDLGSNRL	4.8e-07	MSGVVSDPKNTLESWNSPWIHVCNWSGIGCNINRTRVIELDLSGLSLRGTILPAISNLSYLKILDLSGNFFQSHIPAELGSLSRLKQLSLSRNLLEGTIPTELGFLGELVYLDLGSNRLTGEIPMSLFCNGTSSLEYIDLSNNSISGNIPLKMQCELRELRFLLLWSNQLVGQVPQALSNSSKLKWLDLESNALSGPLPSEIVQKMPMLQFLYLSYNNFSSHNGNTDLKPFFSSLVNSTNLQELELAGNNLGGDIPSIIGDLSTTLVQIHLDDNLIYGSIPPHISKLVNLTLLNLSSNLINGSIPRELCRMRKLERLYLSNNSLSGDIPSTFGDVPHLGLLDLSKNKLSGSIPDSFANLSQLRRLLLYENQLSGTIPPSLGKCVNLEILDLSCNKISGV…	528	1587	https://onlinelibrary.wiley.com/doi/full/10.1111/pbi.13558
PlantKGA_431	Apiales	Araliaceae	Panax	notoginseng	Panax notoginseng		三七	chromosome	Yes	转录本	Pno01G004624t1	Pno01G004624t11288xxPlantKGA_431	Pno01G004624	L	partial	1	21031923	21033509	+	Pfam	PF13855	Leucine rich repeat	Leucine-rich repeat	312	372	RKLERLYLSNNSLSGDIPSTFGDVPHLGLLDLSKNKLSGSIPDSFANLSQLRRLLLYENQL	5.9e-12	MSGVVSDPKNTLESWNSPWIHVCNWSGIGCNINRTRVIELDLSGLSLRGTILPAISNLSYLKILDLSGNFFQSHIPAELGSLSRLKQLSLSRNLLEGTIPTELGFLGELVYLDLGSNRLTGEIPMSLFCNGTSSLEYIDLSNNSISGNIPLKMQCELRELRFLLLWSNQLVGQVPQALSNSSKLKWLDLESNALSGPLPSEIVQKMPMLQFLYLSYNNFSSHNGNTDLKPFFSSLVNSTNLQELELAGNNLGGDIPSIIGDLSTTLVQIHLDDNLIYGSIPPHISKLVNLTLLNLSSNLINGSIPRELCRMRKLERLYLSNNSLSGDIPSTFGDVPHLGLLDLSKNKLSGSIPDSFANLSQLRRLLLYENQLSGTIPPSLGKCVNLEILDLSCNKISGV…	528	1587	https://onlinelibrary.wiley.com/doi/full/10.1111/pbi.13558
PlantKGA_431	Apiales	Araliaceae	Panax	notoginseng	Panax notoginseng		三七	chromosome	Yes	转录本	Pno01G004624t1	Pno01G004624t11288xxPlantKGA_431	Pno01G004624	L	partial	1	21031923	21033509	+	Pfam	PF13516	Leucine Rich repeat	Leucine-rich repeat	383	398	CVNLEILDLSCNKISG	0.17	MSGVVSDPKNTLESWNSPWIHVCNWSGIGCNINRTRVIELDLSGLSLRGTILPAISNLSYLKILDLSGNFFQSHIPAELGSLSRLKQLSLSRNLLEGTIPTELGFLGELVYLDLGSNRLTGEIPMSLFCNGTSSLEYIDLSNNSISGNIPLKMQCELRELRFLLLWSNQLVGQVPQALSNSSKLKWLDLESNALSGPLPSEIVQKMPMLQFLYLSYNNFSSHNGNTDLKPFFSSLVNSTNLQELELAGNNLGGDIPSIIGDLSTTLVQIHLDDNLIYGSIPPHISKLVNLTLLNLSSNLINGSIPRELCRMRKLERLYLSNNSLSGDIPSTFGDVPHLGLLDLSKNKLSGSIPDSFANLSQLRRLLLYENQLSGTIPPSLGKCVNLEILDLSCNKISGV…	528	1587	https://onlinelibrary.wiley.com/doi/full/10.1111/pbi.13558
PlantKGA_431	Apiales	Araliaceae	Panax	notoginseng	Panax notoginseng		三七	chromosome	Yes	转录本	Pno01G004624t1	Pno01G004624t11288xxPlantKGA_431	Pno01G004624	L	partial	1	21031923	21033509	+	Pfam	PF13516	Leucine Rich repeat	Leucine-rich repeat	238	254	STNLQELELAGNNLGGD	0.34	MSGVVSDPKNTLESWNSPWIHVCNWSGIGCNINRTRVIELDLSGLSLRGTILPAISNLSYLKILDLSGNFFQSHIPAELGSLSRLKQLSLSRNLLEGTIPTELGFLGELVYLDLGSNRLTGEIPMSLFCNGTSSLEYIDLSNNSISGNIPLKMQCELRELRFLLLWSNQLVGQVPQALSNSSKLKWLDLESNALSGPLPSEIVQKMPMLQFLYLSYNNFSSHNGNTDLKPFFSSLVNSTNLQELELAGNNLGGDIPSIIGDLSTTLVQIHLDDNLIYGSIPPHISKLVNLTLLNLSSNLINGSIPRELCRMRKLERLYLSNNSLSGDIPSTFGDVPHLGLLDLSKNKLSGSIPDSFANLSQLRRLLLYENQLSGTIPPSLGKCVNLEILDLSCNKISGV…	528	1587	https://onlinelibrary.wiley.com/doi/full/10.1111/pbi.13558
PlantKGA_431	Apiales	Araliaceae	Panax	notoginseng	Panax notoginseng		三七	chromosome	Yes	转录本	Pno01G004624t1	Pno01G004624t11288xxPlantKGA_431	Pno01G004624	L	partial	1	21031923	21033509	+	Pfam	PF08263	Leucine rich repeat N-terminal domain	Leucine-rich repeat-containing N-terminal, plant-type	4	31	VVSDPKNTLESWNSPWIHVCNWSGIGCN	0.0004	MSGVVSDPKNTLESWNSPWIHVCNWSGIGCNINRTRVIELDLSGLSLRGTILPAISNLSYLKILDLSGNFFQSHIPAELGSLSRLKQLSLSRNLLEGTIPTELGFLGELVYLDLGSNRLTGEIPMSLFCNGTSSLEYIDLSNNSISGNIPLKMQCELRELRFLLLWSNQLVGQVPQALSNSSKLKWLDLESNALSGPLPSEIVQKMPMLQFLYLSYNNFSSHNGNTDLKPFFSSLVNSTNLQELELAGNNLGGDIPSIIGDLSTTLVQIHLDDNLIYGSIPPHISKLVNLTLLNLSSNLINGSIPRELCRMRKLERLYLSNNSLSGDIPSTFGDVPHLGLLDLSKNKLSGSIPDSFANLSQLRRLLLYENQLSGTIPPSLGKCVNLEILDLSCNKISGV…	528	1587	https://onlinelibrary.wiley.com/doi/full/10.1111/pbi.13558
PlantKGA_431	Apiales	Araliaceae	Panax	notoginseng	Panax notoginseng		三七	chromosome	Yes	转录本	Pno01G005007t1	Pno01G005007t11288xxPlantKGA_431	Pno01G005007	L	partial	1	216536869	216540338	+	Pfam	PF13855	Leucine rich repeat	Leucine-rich repeat	853	912	LQSLNLSNNHLTGPIPSFLGNLTNLESLDLSRNKLSGVIPQQFVKDLNFLAFLNVSYNLL	2.8e-07	MAAPYLYALCFTRSLLIFLLFTIMMLNNKSYSSAAPPPPMCHQDESSALLKFNQSLSLDQSASGDPSAYPKTGSWKLITKGGESIDCCSWGGVECDNHTGHVIGLDLSSSFLYGPITANSSIFSLVHLQSLNLGDNNFIRSQIPPEISHLSSLSSLNLSFSVFSGRIPSELSRLSKLASLDLSQNDLYGEFPRGIFHLSDLLILDVGYNRNLTGYLPDFNQSSSLKDLRISSTNFSGKLPISIGNLKALNIFNLRGCFFSGSIPVSLGNLTQLSYLSLSRNNFSGPIPNEFLRLSKLTSLDLSYNNLYGEFPSGIFHLPNLLILDVSYNRNLTGYLPEFNQSSSLKELRLNKCYFSGSISASLGNQTQLTYLSLYSNNFNVGKLSWIGKLTKLTTVDVR…	1018	3470	https://onlinelibrary.wiley.com/doi/full/10.1111/pbi.13558
PlantKGA_431	Apiales	Araliaceae	Panax	notoginseng	Panax notoginseng		三七	chromosome	Yes	转录本	Pno01G005007t1	Pno01G005007t11288xxPlantKGA_431	Pno01G005007	L	partial	1	216536869	216540338	+	Pfam	PF13855	Leucine rich repeat	Leucine-rich repeat	655	714	SLMILNLNANNFSGTIPQTYTKECNLKMMHLSQNHLEGQLPRSLENCKMLQSLDLADNRL	3.1e-07	MAAPYLYALCFTRSLLIFLLFTIMMLNNKSYSSAAPPPPMCHQDESSALLKFNQSLSLDQSASGDPSAYPKTGSWKLITKGGESIDCCSWGGVECDNHTGHVIGLDLSSSFLYGPITANSSIFSLVHLQSLNLGDNNFIRSQIPPEISHLSSLSSLNLSFSVFSGRIPSELSRLSKLASLDLSQNDLYGEFPRGIFHLSDLLILDVGYNRNLTGYLPDFNQSSSLKDLRISSTNFSGKLPISIGNLKALNIFNLRGCFFSGSIPVSLGNLTQLSYLSLSRNNFSGPIPNEFLRLSKLTSLDLSYNNLYGEFPSGIFHLPNLLILDVSYNRNLTGYLPEFNQSSSLKELRLNKCYFSGSISASLGNQTQLTYLSLYSNNFNVGKLSWIGKLTKLTTVDVR…	1018	3470	https://onlinelibrary.wiley.com/doi/full/10.1111/pbi.13558
PlantKGA_431	Apiales	Araliaceae	Panax	notoginseng	Panax notoginseng		三七	chromosome	Yes	转录本	Pno01G005007t1	Pno01G005007t11288xxPlantKGA_431	Pno01G005007	L	partial	1	216536869	216540338	+	Pfam	PF08263	Leucine rich repeat N-terminal domain	Leucine-rich repeat-containing N-terminal, plant-type	43	96	QDESSALLKFNQSLSLDQSASGDPSAYPKTGSWKLITKGGESIDCCSWGGVECD	6.5e-07	MAAPYLYALCFTRSLLIFLLFTIMMLNNKSYSSAAPPPPMCHQDESSALLKFNQSLSLDQSASGDPSAYPKTGSWKLITKGGESIDCCSWGGVECDNHTGHVIGLDLSSSFLYGPITANSSIFSLVHLQSLNLGDNNFIRSQIPPEISHLSSLSSLNLSFSVFSGRIPSELSRLSKLASLDLSQNDLYGEFPRGIFHLSDLLILDVGYNRNLTGYLPDFNQSSSLKDLRISSTNFSGKLPISIGNLKALNIFNLRGCFFSGSIPVSLGNLTQLSYLSLSRNNFSGPIPNEFLRLSKLTSLDLSYNNLYGEFPSGIFHLPNLLILDVSYNRNLTGYLPEFNQSSSLKELRLNKCYFSGSISASLGNQTQLTYLSLYSNNFNVGKLSWIGKLTKLTTVDVR…	1018	3470	https://onlinelibrary.wiley.com/doi/full/10.1111/pbi.13558
PlantKGA_431	Apiales	Araliaceae	Panax	notoginseng	Panax notoginseng		三七	chromosome	Yes	转录本	Pno01G005010t1	Pno01G005010t11288xxPlantKGA_431	Pno01G005010	L	partial	1	216563225	216566608	+	Pfam	PF08263	Leucine rich repeat N-terminal domain	Leucine-rich repeat-containing N-terminal, plant-type	44	96	DEGSALLKFNQSLSLDQSASVDPSAYPKTGSWKLITRGGEIIDCCSWDGVECD	1.3e-06	MAAPYLYALCFTRSLLMFLLSTIMMLNNNSYSSVAPPPPMCHRDEGSALLKFNQSLSLDQSASVDPSAYPKTGSWKLITRGGEIIDCCSWDGVECDNHTGHVIGLDLSSSFLYGPITANSSIFSLVHLRSLNLGDNNFVRSQIPPEISYLSSLSSLNLSMSAFSGQIPSELLRLSKLASLDLSFNKLYGEFPGGIFHQPDLLFLNVSYNSNITGYLPEFNQSSSLKDLRISGTNFSGKLPVSIGNLKALNSLVLSECYFSGSIPASLGNLTQLTRLYLFSNNFNVGKLSWIGKLTKLIWLNVRDSNLYGEIPSSLANLTQLTELQIGLNNFYAGEIPSWLMNMTQLIWIDISHSQLQGPISSSFSQFNNLNTLYLNHNNLSGTVDADIFLNLKTLTNLM…	920	3384	https://onlinelibrary.wiley.com/doi/full/10.1111/pbi.13558
PlantKGA_431	Apiales	Araliaceae	Panax	notoginseng	Panax notoginseng		三七	chromosome	Yes	转录本	Pno01G005010t1	Pno01G005010t11288xxPlantKGA_431	Pno01G005010	L	partial	1	216563225	216566608	+	Pfam	PF13855	Leucine rich repeat	Leucine-rich repeat	757	817	GLQLLNLSNNHLTGPIPSFLGNLTNLESLDLSRNKLSGVIPQQFVQELNFLAFLNVSYNLL	1e-06	MAAPYLYALCFTRSLLMFLLSTIMMLNNNSYSSVAPPPPMCHRDEGSALLKFNQSLSLDQSASVDPSAYPKTGSWKLITRGGEIIDCCSWDGVECDNHTGHVIGLDLSSSFLYGPITANSSIFSLVHLRSLNLGDNNFVRSQIPPEISYLSSLSSLNLSMSAFSGQIPSELLRLSKLASLDLSFNKLYGEFPGGIFHQPDLLFLNVSYNSNITGYLPEFNQSSSLKDLRISGTNFSGKLPVSIGNLKALNSLVLSECYFSGSIPASLGNLTQLTRLYLFSNNFNVGKLSWIGKLTKLIWLNVRDSNLYGEIPSSLANLTQLTELQIGLNNFYAGEIPSWLMNMTQLIWIDISHSQLQGPISSSFSQFNNLNTLYLNHNNLSGTVDADIFLNLKTLTNLM…	920	3384	https://onlinelibrary.wiley.com/doi/full/10.1111/pbi.13558
PlantKGA_431	Apiales	Araliaceae	Panax	notoginseng	Panax notoginseng		三七	chromosome	Yes	转录本	Pno01G005197t1	Pno01G005197t11288xxPlantKGA_431	Pno01G005197	L	partial	1	219208576	219211706	+	Pfam	PF13855	Leucine rich repeat	Leucine-rich repeat	288	347	SLRNLDLSWNGFNSTIPDWLYSFSRLESLDLSSNVLQGTISSDIKNLTSIITLDLSNNKL	3.6e-07	MGIMVRFILLELLAIATFILGPGYGKSHAAVCTEDEKRALLSFKQYLNDPSNRLSSWHAKDDCCKWSGVVCDNFTGHVRELHLQNPCVTKGGDDAFRRLQLSGQINPSLLNLKHLSYLDLSRNDFGGIPIPSFIGSLVSLRRLNLSRAGFGGIIPHHLGNLSLLQSLDLRVSNAYILEVENLQWLSTLLCLEHLDLSRVNLQDSPNWLQVINMLSSLVELHMSDCQLEYIHPIRDINFTSLSVLDLSRNLFSFTVPNWIFSLKSLVSLHLSRNGFEGPIPIGLKNMTSLRNLDLSWNGFNSTIPDWLYSFSRLESLDLSSNVLQGTISSDIKNLTSIITLDLSNNKLQGKIPISSLRNLCNLKVFVLSGNKLEGEEVSELFQALSSCNSNPLESLRLSM…	987	3131	https://onlinelibrary.wiley.com/doi/full/10.1111/pbi.13558
PlantKGA_431	Apiales	Araliaceae	Panax	notoginseng	Panax notoginseng		三七	chromosome	Yes	转录本	Pno01G005197t1	Pno01G005197t11288xxPlantKGA_431	Pno01G005197	L	partial	1	219208576	219211706	+	Pfam	PF08263	Leucine rich repeat N-terminal domain	Leucine-rich repeat-containing N-terminal, plant-type	34	72	EDEKRALLSFKQYLNDPSNRLSSWHAKDDCCKWSGVVCD	2.8e-12	MGIMVRFILLELLAIATFILGPGYGKSHAAVCTEDEKRALLSFKQYLNDPSNRLSSWHAKDDCCKWSGVVCDNFTGHVRELHLQNPCVTKGGDDAFRRLQLSGQINPSLLNLKHLSYLDLSRNDFGGIPIPSFIGSLVSLRRLNLSRAGFGGIIPHHLGNLSLLQSLDLRVSNAYILEVENLQWLSTLLCLEHLDLSRVNLQDSPNWLQVINMLSSLVELHMSDCQLEYIHPIRDINFTSLSVLDLSRNLFSFTVPNWIFSLKSLVSLHLSRNGFEGPIPIGLKNMTSLRNLDLSWNGFNSTIPDWLYSFSRLESLDLSSNVLQGTISSDIKNLTSIITLDLSNNKLQGKIPISSLRNLCNLKVFVLSGNKLEGEEVSELFQALSSCNSNPLESLRLSM…	987	3131	https://onlinelibrary.wiley.com/doi/full/10.1111/pbi.13558
PlantKGA_431	Apiales	Araliaceae	Panax	notoginseng	Panax notoginseng		三七	chromosome	Yes	转录本	Pno01G005197t1	Pno01G005197t11288xxPlantKGA_431	Pno01G005197	L	partial	1	219208576	219211706	+	Pfam	PF00560	Leucine Rich Repeat	Leucine-rich repeat	415	437	HLQFLDLSGNSISGPIPQSLGNL	0.3	MGIMVRFILLELLAIATFILGPGYGKSHAAVCTEDEKRALLSFKQYLNDPSNRLSSWHAKDDCCKWSGVVCDNFTGHVRELHLQNPCVTKGGDDAFRRLQLSGQINPSLLNLKHLSYLDLSRNDFGGIPIPSFIGSLVSLRRLNLSRAGFGGIIPHHLGNLSLLQSLDLRVSNAYILEVENLQWLSTLLCLEHLDLSRVNLQDSPNWLQVINMLSSLVELHMSDCQLEYIHPIRDINFTSLSVLDLSRNLFSFTVPNWIFSLKSLVSLHLSRNGFEGPIPIGLKNMTSLRNLDLSWNGFNSTIPDWLYSFSRLESLDLSSNVLQGTISSDIKNLTSIITLDLSNNKLQGKIPISSLRNLCNLKVFVLSGNKLEGEEVSELFQALSSCNSNPLESLRLSM…	987	3131	https://onlinelibrary.wiley.com/doi/full/10.1111/pbi.13558
PlantKGA_431	Apiales	Araliaceae	Panax	notoginseng	Panax notoginseng		三七	chromosome	Yes	转录本	Pno01G005197t1	Pno01G005197t11288xxPlantKGA_431	Pno01G005197	L	partial	1	219208576	219211706	+	Pfam	PF00560	Leucine Rich Repeat	Leucine-rich repeat	115	133	LSYLDLSRNDFGGIPIPSF	1.1	MGIMVRFILLELLAIATFILGPGYGKSHAAVCTEDEKRALLSFKQYLNDPSNRLSSWHAKDDCCKWSGVVCDNFTGHVRELHLQNPCVTKGGDDAFRRLQLSGQINPSLLNLKHLSYLDLSRNDFGGIPIPSFIGSLVSLRRLNLSRAGFGGIIPHHLGNLSLLQSLDLRVSNAYILEVENLQWLSTLLCLEHLDLSRVNLQDSPNWLQVINMLSSLVELHMSDCQLEYIHPIRDINFTSLSVLDLSRNLFSFTVPNWIFSLKSLVSLHLSRNGFEGPIPIGLKNMTSLRNLDLSWNGFNSTIPDWLYSFSRLESLDLSSNVLQGTISSDIKNLTSIITLDLSNNKLQGKIPISSLRNLCNLKVFVLSGNKLEGEEVSELFQALSSCNSNPLESLRLSM…	987	3131	https://onlinelibrary.wiley.com/doi/full/10.1111/pbi.13558
PlantKGA_431	Apiales	Araliaceae	Panax	notoginseng	Panax notoginseng		三七	chromosome	Yes	转录本	Pno01G005197t1	Pno01G005197t11288xxPlantKGA_431	Pno01G005197	L	partial	1	219208576	219211706	+	Pfam	PF00560	Leucine Rich Repeat	Leucine-rich repeat	733	754	LQILDLANNHLSGRIPLCLKNL	0.59	MGIMVRFILLELLAIATFILGPGYGKSHAAVCTEDEKRALLSFKQYLNDPSNRLSSWHAKDDCCKWSGVVCDNFTGHVRELHLQNPCVTKGGDDAFRRLQLSGQINPSLLNLKHLSYLDLSRNDFGGIPIPSFIGSLVSLRRLNLSRAGFGGIIPHHLGNLSLLQSLDLRVSNAYILEVENLQWLSTLLCLEHLDLSRVNLQDSPNWLQVINMLSSLVELHMSDCQLEYIHPIRDINFTSLSVLDLSRNLFSFTVPNWIFSLKSLVSLHLSRNGFEGPIPIGLKNMTSLRNLDLSWNGFNSTIPDWLYSFSRLESLDLSSNVLQGTISSDIKNLTSIITLDLSNNKLQGKIPISSLRNLCNLKVFVLSGNKLEGEEVSELFQALSSCNSNPLESLRLSM…	987	3131	https://onlinelibrary.wiley.com/doi/full/10.1111/pbi.13558
PlantKGA_431	Apiales	Araliaceae	Panax	notoginseng	Panax notoginseng		三七	chromosome	Yes	转录本	Pno01G005313t1	Pno01G005313t11288xxPlantKGA_431	Pno01G005313	L	partial	1	221004474	221005466	-	Pfam	PF13855	Leucine rich repeat	Leucine-rich repeat	174	232	LKSIDLSSNKLAGNIPQEFASLRELISLNLSINCLTGNIIQKIDQLRMLESLDLSQNQL	1.8e-07	MEELVILNLANNNFSGKIPSSMGSLYQLQTLYLRNNNLIGGLPLTLKNCSKLRIVDLGQNKLSGNVSAWVGTNLASLIVLSLRLNEFNGSIPTQICHLNYIQILDLSRNNISGKIPLCFNNFTSLVQRNSSSGTLVFNITAYEGYYFDGGDFVGNALVQWKRRESEYTKTLGLLKSIDLSSNKLAGNIPQEFASLRELISLNLSINCLTGNIIQKIDQLRMLESLDLSQNQLSGAIPLGFVRLNYLSVLDLSNNNLSGKIPSSTQLQSFNASNFAGNLELCGLPLTNKCPGDETAPLPPTIEDNNLQEDEDRLITPGFYLSVGLGFAVGF	330	993	https://onlinelibrary.wiley.com/doi/full/10.1111/pbi.13558
PlantKGA_431	Apiales	Araliaceae	Panax	notoginseng	Panax notoginseng		三七	chromosome	Yes	转录本	Pno01G005313t1	Pno01G005313t11288xxPlantKGA_431	Pno01G005313	L	partial	1	221004474	221005466	-	Pfam	PF00560	Leucine Rich Repeat	Leucine-rich repeat	27	49	QLQTLYLRNNNLIGGLPLTLKNC	0.079	MEELVILNLANNNFSGKIPSSMGSLYQLQTLYLRNNNLIGGLPLTLKNCSKLRIVDLGQNKLSGNVSAWVGTNLASLIVLSLRLNEFNGSIPTQICHLNYIQILDLSRNNISGKIPLCFNNFTSLVQRNSSSGTLVFNITAYEGYYFDGGDFVGNALVQWKRRESEYTKTLGLLKSIDLSSNKLAGNIPQEFASLRELISLNLSINCLTGNIIQKIDQLRMLESLDLSQNQLSGAIPLGFVRLNYLSVLDLSNNNLSGKIPSSTQLQSFNASNFAGNLELCGLPLTNKCPGDETAPLPPTIEDNNLQEDEDRLITPGFYLSVGLGFAVGF	330	993	https://onlinelibrary.wiley.com/doi/full/10.1111/pbi.13558
PlantKGA_431	Apiales	Araliaceae	Panax	notoginseng	Panax notoginseng		三七	chromosome	Yes	转录本	Pno01G005313t1	Pno01G005313t11288xxPlantKGA_431	Pno01G005313	L	partial	1	221004474	221005466	-	Pfam	PF00560	Leucine Rich Repeat	Leucine-rich repeat	246	263	LSVLDLSNNNLSGKIPSS	0.6	MEELVILNLANNNFSGKIPSSMGSLYQLQTLYLRNNNLIGGLPLTLKNCSKLRIVDLGQNKLSGNVSAWVGTNLASLIVLSLRLNEFNGSIPTQICHLNYIQILDLSRNNISGKIPLCFNNFTSLVQRNSSSGTLVFNITAYEGYYFDGGDFVGNALVQWKRRESEYTKTLGLLKSIDLSSNKLAGNIPQEFASLRELISLNLSINCLTGNIIQKIDQLRMLESLDLSQNQLSGAIPLGFVRLNYLSVLDLSNNNLSGKIPSSTQLQSFNASNFAGNLELCGLPLTNKCPGDETAPLPPTIEDNNLQEDEDRLITPGFYLSVGLGFAVGF	330	993	https://onlinelibrary.wiley.com/doi/full/10.1111/pbi.13558
PlantKGA_431	Apiales	Araliaceae	Panax	notoginseng	Panax notoginseng		三七	chromosome	Yes	转录本	Pno01G005313t1	Pno01G005313t11288xxPlantKGA_431	Pno01G005313	L	partial	1	221004474	221005466	-	Pfam	PF00560	Leucine Rich Repeat	Leucine-rich repeat	102	122	QILDLSRNNISGKIPLCFNNF	0.44	MEELVILNLANNNFSGKIPSSMGSLYQLQTLYLRNNNLIGGLPLTLKNCSKLRIVDLGQNKLSGNVSAWVGTNLASLIVLSLRLNEFNGSIPTQICHLNYIQILDLSRNNISGKIPLCFNNFTSLVQRNSSSGTLVFNITAYEGYYFDGGDFVGNALVQWKRRESEYTKTLGLLKSIDLSSNKLAGNIPQEFASLRELISLNLSINCLTGNIIQKIDQLRMLESLDLSQNQLSGAIPLGFVRLNYLSVLDLSNNNLSGKIPSSTQLQSFNASNFAGNLELCGLPLTNKCPGDETAPLPPTIEDNNLQEDEDRLITPGFYLSVGLGFAVGF	330	993	https://onlinelibrary.wiley.com/doi/full/10.1111/pbi.13558
PlantKGA_431	Apiales	Araliaceae	Panax	notoginseng	Panax notoginseng		三七	chromosome	Yes	转录本	Pno01G005314t1	Pno01G005314t11288xxPlantKGA_431	Pno01G005314	L	partial	1	221006041	221008587	-	Pfam	PF13516	Leucine Rich repeat	Leucine-rich repeat	360	375	SQNLKYLNLSYNQMSG	0.32	MFSGSVSFLCSIANGYFTSLDLSDNQLSGELPDCWMKMEELVILNLANNNFSGKISSSMRSLYQLQTLYLRNNNLIGGLPLTLKNCSKLRIVDLGQNKLSGNVPAWVGTHLASLIVLSLRLNEFNGSIPTQICHLNYIQILDLSRNNISGKIPLCFNNFTSLVQRNSSSGTLVFNITAYEGELPDCWMKMEELVILNLANNNFSGKIPSSMGSLYQLQTLYLRNNNLIGGLPLTLKNCSKLRIVDLGQNKLSGNVPAWVDNQLSGELPDCWMKMEELVILNLANNNFSGKIPSSMRSLYQLQTLYLRNNNLIGGLPLTLKNCSKLRIVDLSQNKLSGNVPAWLMKVTILMVVPNWFWELSQNLKYLNLSYNQMSGVVSDLTSKFVAYPSIDLDSNHFEG…	511	2547	https://onlinelibrary.wiley.com/doi/full/10.1111/pbi.13558
PlantKGA_431	Apiales	Araliaceae	Panax	notoginseng	Panax notoginseng		三七	chromosome	Yes	转录本	Pno01G005314t1	Pno01G005314t11288xxPlantKGA_431	Pno01G005314	L	partial	1	221006041	221008587	-	Pfam	PF13516	Leucine Rich repeat	Leucine-rich repeat	16	30	YFTSLDLSDNQLSGE	1.2	MFSGSVSFLCSIANGYFTSLDLSDNQLSGELPDCWMKMEELVILNLANNNFSGKISSSMRSLYQLQTLYLRNNNLIGGLPLTLKNCSKLRIVDLGQNKLSGNVPAWVGTHLASLIVLSLRLNEFNGSIPTQICHLNYIQILDLSRNNISGKIPLCFNNFTSLVQRNSSSGTLVFNITAYEGELPDCWMKMEELVILNLANNNFSGKIPSSMGSLYQLQTLYLRNNNLIGGLPLTLKNCSKLRIVDLGQNKLSGNVPAWVDNQLSGELPDCWMKMEELVILNLANNNFSGKIPSSMRSLYQLQTLYLRNNNLIGGLPLTLKNCSKLRIVDLSQNKLSGNVPAWLMKVTILMVVPNWFWELSQNLKYLNLSYNQMSGVVSDLTSKFVAYPSIDLDSNHFEG…	511	2547	https://onlinelibrary.wiley.com/doi/full/10.1111/pbi.13558
PlantKGA_431	Apiales	Araliaceae	Panax	notoginseng	Panax notoginseng		三七	chromosome	Yes	转录本	Pno01G005314t1	Pno01G005314t11288xxPlantKGA_431	Pno01G005314	L	partial	1	221006041	221008587	-	Pfam	PF13516	Leucine Rich repeat	Leucine-rich repeat	432	446	YFTSLDLSDNQLSGE	1.2	MFSGSVSFLCSIANGYFTSLDLSDNQLSGELPDCWMKMEELVILNLANNNFSGKISSSMRSLYQLQTLYLRNNNLIGGLPLTLKNCSKLRIVDLGQNKLSGNVPAWVGTHLASLIVLSLRLNEFNGSIPTQICHLNYIQILDLSRNNISGKIPLCFNNFTSLVQRNSSSGTLVFNITAYEGELPDCWMKMEELVILNLANNNFSGKIPSSMGSLYQLQTLYLRNNNLIGGLPLTLKNCSKLRIVDLGQNKLSGNVPAWVDNQLSGELPDCWMKMEELVILNLANNNFSGKIPSSMRSLYQLQTLYLRNNNLIGGLPLTLKNCSKLRIVDLSQNKLSGNVPAWLMKVTILMVVPNWFWELSQNLKYLNLSYNQMSGVVSDLTSKFVAYPSIDLDSNHFEG…	511	2547	https://onlinelibrary.wiley.com/doi/full/10.1111/pbi.13558
PlantKGA_431	Apiales	Araliaceae	Panax	notoginseng	Panax notoginseng		三七	chromosome	Yes	转录本	Pno01G005314t1	Pno01G005314t11288xxPlantKGA_431	Pno01G005314	L	partial	1	221006041	221008587	-	Pfam	PF00560	Leucine Rich Repeat	Leucine-rich repeat	216	238	QLQTLYLRNNNLIGGLPLTLKNC	0.14	MFSGSVSFLCSIANGYFTSLDLSDNQLSGELPDCWMKMEELVILNLANNNFSGKISSSMRSLYQLQTLYLRNNNLIGGLPLTLKNCSKLRIVDLGQNKLSGNVPAWVGTHLASLIVLSLRLNEFNGSIPTQICHLNYIQILDLSRNNISGKIPLCFNNFTSLVQRNSSSGTLVFNITAYEGELPDCWMKMEELVILNLANNNFSGKIPSSMGSLYQLQTLYLRNNNLIGGLPLTLKNCSKLRIVDLGQNKLSGNVPAWVDNQLSGELPDCWMKMEELVILNLANNNFSGKIPSSMRSLYQLQTLYLRNNNLIGGLPLTLKNCSKLRIVDLSQNKLSGNVPAWLMKVTILMVVPNWFWELSQNLKYLNLSYNQMSGVVSDLTSKFVAYPSIDLDSNHFEG…	511	2547	https://onlinelibrary.wiley.com/doi/full/10.1111/pbi.13558
PlantKGA_431	Apiales	Araliaceae	Panax	notoginseng	Panax notoginseng		三七	chromosome	Yes	转录本	Pno01G005314t1	Pno01G005314t11288xxPlantKGA_431	Pno01G005314	L	partial	1	221006041	221008587	-	Pfam	PF00560	Leucine Rich Repeat	Leucine-rich repeat	139	159	QILDLSRNNISGKIPLCFNNF	0.76	MFSGSVSFLCSIANGYFTSLDLSDNQLSGELPDCWMKMEELVILNLANNNFSGKISSSMRSLYQLQTLYLRNNNLIGGLPLTLKNCSKLRIVDLGQNKLSGNVPAWVGTHLASLIVLSLRLNEFNGSIPTQICHLNYIQILDLSRNNISGKIPLCFNNFTSLVQRNSSSGTLVFNITAYEGELPDCWMKMEELVILNLANNNFSGKIPSSMGSLYQLQTLYLRNNNLIGGLPLTLKNCSKLRIVDLGQNKLSGNVPAWVDNQLSGELPDCWMKMEELVILNLANNNFSGKIPSSMRSLYQLQTLYLRNNNLIGGLPLTLKNCSKLRIVDLSQNKLSGNVPAWLMKVTILMVVPNWFWELSQNLKYLNLSYNQMSGVVSDLTSKFVAYPSIDLDSNHFEG…	511	2547	https://onlinelibrary.wiley.com/doi/full/10.1111/pbi.13558
PlantKGA_431	Apiales	Araliaceae	Panax	notoginseng	Panax notoginseng		三七	chromosome	Yes	转录本	Pno01G005314t1	Pno01G005314t11288xxPlantKGA_431	Pno01G005314	L	partial	1	221006041	221008587	-	Pfam	PF00560	Leucine Rich Repeat	Leucine-rich repeat	300	322	QLQTLYLRNNNLIGGLPLTLKNC	0.14	MFSGSVSFLCSIANGYFTSLDLSDNQLSGELPDCWMKMEELVILNLANNNFSGKISSSMRSLYQLQTLYLRNNNLIGGLPLTLKNCSKLRIVDLGQNKLSGNVPAWVGTHLASLIVLSLRLNEFNGSIPTQICHLNYIQILDLSRNNISGKIPLCFNNFTSLVQRNSSSGTLVFNITAYEGELPDCWMKMEELVILNLANNNFSGKIPSSMGSLYQLQTLYLRNNNLIGGLPLTLKNCSKLRIVDLGQNKLSGNVPAWVDNQLSGELPDCWMKMEELVILNLANNNFSGKIPSSMRSLYQLQTLYLRNNNLIGGLPLTLKNCSKLRIVDLSQNKLSGNVPAWLMKVTILMVVPNWFWELSQNLKYLNLSYNQMSGVVSDLTSKFVAYPSIDLDSNHFEG…	511	2547	https://onlinelibrary.wiley.com/doi/full/10.1111/pbi.13558
PlantKGA_431	Apiales	Araliaceae	Panax	notoginseng	Panax notoginseng		三七	chromosome	Yes	转录本	Pno01G005314t1	Pno01G005314t11288xxPlantKGA_431	Pno01G005314	L	partial	1	221006041	221008587	-	Pfam	PF00560	Leucine Rich Repeat	Leucine-rich repeat	480	502	QLQTLYLRNNNLIGGLPLTLKNC	0.14	MFSGSVSFLCSIANGYFTSLDLSDNQLSGELPDCWMKMEELVILNLANNNFSGKISSSMRSLYQLQTLYLRNNNLIGGLPLTLKNCSKLRIVDLGQNKLSGNVPAWVGTHLASLIVLSLRLNEFNGSIPTQICHLNYIQILDLSRNNISGKIPLCFNNFTSLVQRNSSSGTLVFNITAYEGELPDCWMKMEELVILNLANNNFSGKIPSSMGSLYQLQTLYLRNNNLIGGLPLTLKNCSKLRIVDLGQNKLSGNVPAWVDNQLSGELPDCWMKMEELVILNLANNNFSGKIPSSMRSLYQLQTLYLRNNNLIGGLPLTLKNCSKLRIVDLSQNKLSGNVPAWLMKVTILMVVPNWFWELSQNLKYLNLSYNQMSGVVSDLTSKFVAYPSIDLDSNHFEG…	511	2547	https://onlinelibrary.wiley.com/doi/full/10.1111/pbi.13558
PlantKGA_431	Apiales	Araliaceae	Panax	notoginseng	Panax notoginseng		三七	chromosome	Yes	转录本	Pno01G005314t1	Pno01G005314t11288xxPlantKGA_431	Pno01G005314	L	partial	1	221006041	221008587	-	Pfam	PF00560	Leucine Rich Repeat	Leucine-rich repeat	64	86	QLQTLYLRNNNLIGGLPLTLKNC	0.14	MFSGSVSFLCSIANGYFTSLDLSDNQLSGELPDCWMKMEELVILNLANNNFSGKISSSMRSLYQLQTLYLRNNNLIGGLPLTLKNCSKLRIVDLGQNKLSGNVPAWVGTHLASLIVLSLRLNEFNGSIPTQICHLNYIQILDLSRNNISGKIPLCFNNFTSLVQRNSSSGTLVFNITAYEGELPDCWMKMEELVILNLANNNFSGKIPSSMGSLYQLQTLYLRNNNLIGGLPLTLKNCSKLRIVDLGQNKLSGNVPAWVDNQLSGELPDCWMKMEELVILNLANNNFSGKIPSSMRSLYQLQTLYLRNNNLIGGLPLTLKNCSKLRIVDLSQNKLSGNVPAWLMKVTILMVVPNWFWELSQNLKYLNLSYNQMSGVVSDLTSKFVAYPSIDLDSNHFEG…	511	2547	https://onlinelibrary.wiley.com/doi/full/10.1111/pbi.13558
PlantKGA_431	Apiales	Araliaceae	Panax	notoginseng	Panax notoginseng		三七	chromosome	Yes	转录本	Pno01G005315t1	Pno01G005315t11288xxPlantKGA_431	Pno01G005315	L	partial	1	221008773	221010093	-	Pfam	PF13516	Leucine Rich repeat	Leucine-rich repeat	315	331	LNYIQILDLSRNNISGK	1.6	MFSGSISFLCSIANWYFTSLDLSDNQLSGELPDCWMKMEELVILNLANNNFSGKIPSSMRSLYQLQTLYLRNNNSIGGLPLTLKNCSKLRIVDLGQNKLSGNVPAWLMKVTILMVVPNWCWELSQNLKYLNLSYNQMSGVVPDLSSKFVAYPSIDLDSNHFEGLVPSFPLDLTSLHLSKNMFSGSISFLCSIANGYFTSLDLSDNQLSGELPDCWMKMEELVILNLANNNFSGKIPSSMGSLYQLQTLYLRNNNLIGGLPLTLKNCSKLKIVDLGQNKLSGNVPAWVGTHLASLIVLSLRLNEFNGSIPTQICHLNYIQILDLSRNNISGKIQLCFNNFTSLVQRNSSSGTLVFNITAYEGYYFDGGT	368	1321	https://onlinelibrary.wiley.com/doi/full/10.1111/pbi.13558
PlantKGA_431	Apiales	Araliaceae	Panax	notoginseng	Panax notoginseng		三七	chromosome	Yes	转录本	Pno01G005315t1	Pno01G005315t11288xxPlantKGA_431	Pno01G005315	L	partial	1	221008773	221010093	-	Pfam	PF13516	Leucine Rich repeat	Leucine-rich repeat	124	139	SQNLKYLNLSYNQMSG	0.21	MFSGSISFLCSIANWYFTSLDLSDNQLSGELPDCWMKMEELVILNLANNNFSGKIPSSMRSLYQLQTLYLRNNNSIGGLPLTLKNCSKLRIVDLGQNKLSGNVPAWLMKVTILMVVPNWCWELSQNLKYLNLSYNQMSGVVPDLSSKFVAYPSIDLDSNHFEGLVPSFPLDLTSLHLSKNMFSGSISFLCSIANGYFTSLDLSDNQLSGELPDCWMKMEELVILNLANNNFSGKIPSSMGSLYQLQTLYLRNNNLIGGLPLTLKNCSKLKIVDLGQNKLSGNVPAWVGTHLASLIVLSLRLNEFNGSIPTQICHLNYIQILDLSRNNISGKIQLCFNNFTSLVQRNSSSGTLVFNITAYEGYYFDGGT	368	1321	https://onlinelibrary.wiley.com/doi/full/10.1111/pbi.13558
PlantKGA_431	Apiales	Araliaceae	Panax	notoginseng	Panax notoginseng		三七	chromosome	Yes	转录本	Pno01G005315t1	Pno01G005315t11288xxPlantKGA_431	Pno01G005315	L	partial	1	221008773	221010093	-	Pfam	PF13855	Leucine rich repeat	Leucine-rich repeat	18	74	TSLDLSDNQLSGELPDCWMKMEELVILNLANNNFSGKIPSSMRSLYQLQTLYLRNNN	1.8e-06	MFSGSISFLCSIANWYFTSLDLSDNQLSGELPDCWMKMEELVILNLANNNFSGKIPSSMRSLYQLQTLYLRNNNSIGGLPLTLKNCSKLRIVDLGQNKLSGNVPAWLMKVTILMVVPNWCWELSQNLKYLNLSYNQMSGVVPDLSSKFVAYPSIDLDSNHFEGLVPSFPLDLTSLHLSKNMFSGSISFLCSIANGYFTSLDLSDNQLSGELPDCWMKMEELVILNLANNNFSGKIPSSMGSLYQLQTLYLRNNNLIGGLPLTLKNCSKLKIVDLGQNKLSGNVPAWVGTHLASLIVLSLRLNEFNGSIPTQICHLNYIQILDLSRNNISGKIQLCFNNFTSLVQRNSSSGTLVFNITAYEGYYFDGGT	368	1321	https://onlinelibrary.wiley.com/doi/full/10.1111/pbi.13558
PlantKGA_431	Apiales	Araliaceae	Panax	notoginseng	Panax notoginseng		三七	chromosome	Yes	转录本	Pno01G005315t1	Pno01G005315t11288xxPlantKGA_431	Pno01G005315	L	partial	1	221008773	221010093	-	Pfam	PF13855	Leucine rich repeat	Leucine-rich repeat	198	255	TSLDLSDNQLSGELPDCWMKMEELVILNLANNNFSGKIPSSMGSLYQLQTLYLRNNNL	1.1e-06	MFSGSISFLCSIANWYFTSLDLSDNQLSGELPDCWMKMEELVILNLANNNFSGKIPSSMRSLYQLQTLYLRNNNSIGGLPLTLKNCSKLRIVDLGQNKLSGNVPAWLMKVTILMVVPNWCWELSQNLKYLNLSYNQMSGVVPDLSSKFVAYPSIDLDSNHFEGLVPSFPLDLTSLHLSKNMFSGSISFLCSIANGYFTSLDLSDNQLSGELPDCWMKMEELVILNLANNNFSGKIPSSMGSLYQLQTLYLRNNNLIGGLPLTLKNCSKLKIVDLGQNKLSGNVPAWVGTHLASLIVLSLRLNEFNGSIPTQICHLNYIQILDLSRNNISGKIQLCFNNFTSLVQRNSSSGTLVFNITAYEGYYFDGGT	368	1321	https://onlinelibrary.wiley.com/doi/full/10.1111/pbi.13558
PlantKGA_431	Apiales	Araliaceae	Panax	notoginseng	Panax notoginseng		三七	chromosome	Yes	转录本	Pno01G005316t1	Pno01G005316t11288xxPlantKGA_431	Pno01G005316	L	partial	1	221010279	221011826	-	Pfam	PF00560	Leucine Rich Repeat	Leucine-rich repeat	151	171	SLKHLDLSSNQLQGRLPKSIG	0.067	MVSLISLNLASNALEGKIPESFGKMVSLTSLYLIDNLLEGEIPESFGRNLSHLQLLGLSGNNFRGQLHEFLRGLSGGAASSLESLRLADNQLTGSLPDITNFSALTILSLRINQLNGTFPESFGQVSSLLLLDLSSNQMTGSLPDFTFFKSLKHLDLSSNQLQGRLPKSIGQLSELEILDASYNSLEDTLSEAYFSSLSNLKILHLSFNSLALEFSSDWLPPFQLDVIRLAYCRLGTHFPRWLQTQNNYSELDISYAGISDKVPNWCWELSQNLKYLNLSYNQMSGVVPDLSSKFVAYPSIDLDSNHFEGLVPSFPLDLTSLHLSKNIFSGSISFLCSIANGYFTSLDLSNNQLSGELPDCWMKMEELVILNLANNNFSGKIPSSMGSLYQLQTLYLRN…	515	1548	https://onlinelibrary.wiley.com/doi/full/10.1111/pbi.13558
PlantKGA_431	Apiales	Araliaceae	Panax	notoginseng	Panax notoginseng		三七	chromosome	Yes	转录本	Pno01G005316t1	Pno01G005316t11288xxPlantKGA_431	Pno01G005316	L	partial	1	221010279	221011826	-	Pfam	PF00560	Leucine Rich Repeat	Leucine-rich repeat	466	486	QILDLSRNNISGKIPLCFNNF	0.77	MVSLISLNLASNALEGKIPESFGKMVSLTSLYLIDNLLEGEIPESFGRNLSHLQLLGLSGNNFRGQLHEFLRGLSGGAASSLESLRLADNQLTGSLPDITNFSALTILSLRINQLNGTFPESFGQVSSLLLLDLSSNQMTGSLPDFTFFKSLKHLDLSSNQLQGRLPKSIGQLSELEILDASYNSLEDTLSEAYFSSLSNLKILHLSFNSLALEFSSDWLPPFQLDVIRLAYCRLGTHFPRWLQTQNNYSELDISYAGISDKVPNWCWELSQNLKYLNLSYNQMSGVVPDLSSKFVAYPSIDLDSNHFEGLVPSFPLDLTSLHLSKNIFSGSISFLCSIANGYFTSLDLSNNQLSGELPDCWMKMEELVILNLANNNFSGKIPSSMGSLYQLQTLYLRN…	515	1548	https://onlinelibrary.wiley.com/doi/full/10.1111/pbi.13558
PlantKGA_431	Apiales	Araliaceae	Panax	notoginseng	Panax notoginseng		三七	chromosome	Yes	转录本	Pno01G005316t1	Pno01G005316t11288xxPlantKGA_431	Pno01G005316	L	partial	1	221010279	221011826	-	Pfam	PF13516	Leucine Rich repeat	Leucine-rich repeat	271	286	SQNLKYLNLSYNQMSG	0.32	MVSLISLNLASNALEGKIPESFGKMVSLTSLYLIDNLLEGEIPESFGRNLSHLQLLGLSGNNFRGQLHEFLRGLSGGAASSLESLRLADNQLTGSLPDITNFSALTILSLRINQLNGTFPESFGQVSSLLLLDLSSNQMTGSLPDFTFFKSLKHLDLSSNQLQGRLPKSIGQLSELEILDASYNSLEDTLSEAYFSSLSNLKILHLSFNSLALEFSSDWLPPFQLDVIRLAYCRLGTHFPRWLQTQNNYSELDISYAGISDKVPNWCWELSQNLKYLNLSYNQMSGVVPDLSSKFVAYPSIDLDSNHFEGLVPSFPLDLTSLHLSKNIFSGSISFLCSIANGYFTSLDLSNNQLSGELPDCWMKMEELVILNLANNNFSGKIPSSMGSLYQLQTLYLRN…	515	1548	https://onlinelibrary.wiley.com/doi/full/10.1111/pbi.13558
PlantKGA_431	Apiales	Araliaceae	Panax	notoginseng	Panax notoginseng		三七	chromosome	Yes	转录本	Pno01G005316t1	Pno01G005316t11288xxPlantKGA_431	Pno01G005316	L	partial	1	221010279	221011826	-	Pfam	PF13855	Leucine rich repeat	Leucine-rich repeat	345	402	TSLDLSNNQLSGELPDCWMKMEELVILNLANNNFSGKIPSSMGSLYQLQTLYLRNNNL	1.8e-06	MVSLISLNLASNALEGKIPESFGKMVSLTSLYLIDNLLEGEIPESFGRNLSHLQLLGLSGNNFRGQLHEFLRGLSGGAASSLESLRLADNQLTGSLPDITNFSALTILSLRINQLNGTFPESFGQVSSLLLLDLSSNQMTGSLPDFTFFKSLKHLDLSSNQLQGRLPKSIGQLSELEILDASYNSLEDTLSEAYFSSLSNLKILHLSFNSLALEFSSDWLPPFQLDVIRLAYCRLGTHFPRWLQTQNNYSELDISYAGISDKVPNWCWELSQNLKYLNLSYNQMSGVVPDLSSKFVAYPSIDLDSNHFEGLVPSFPLDLTSLHLSKNIFSGSISFLCSIANGYFTSLDLSNNQLSGELPDCWMKMEELVILNLANNNFSGKIPSSMGSLYQLQTLYLRN…	515	1548	https://onlinelibrary.wiley.com/doi/full/10.1111/pbi.13558
PlantKGA_431	Apiales	Araliaceae	Panax	notoginseng	Panax notoginseng		三七	chromosome	Yes	转录本	Pno01G005317t1	Pno01G005317t11288xxPlantKGA_431	Pno01G005317	L	partial	1	221011854	221012509	-	Pfam	PF13516	Leucine Rich repeat	Leucine-rich repeat	25	40	LQHLNYLDLSSNYFGD	0.64	MAASFLGGAKTAVHGVESIATTLQLQHLNYLDLSSNYFGDNQIPEFIGSLTQLQHLNLAENNFVGEIPHQFGNLTKLRFLDLGSNVLDVINLDWLHNLRMLSYLDMSSVNLTNVNWLQAVNKLSFLTELRLSMCGLSGVTSLSIPLANSSSMNLAVVDLSVNDYVSSSEFHWLFNFSSSLVDIDISSNSL	190	656	https://onlinelibrary.wiley.com/doi/full/10.1111/pbi.13558
PlantKGA_431	Apiales	Araliaceae	Panax	notoginseng	Panax notoginseng		三七	chromosome	Yes	转录本	Pno01G005317t1	Pno01G005317t11288xxPlantKGA_431	Pno01G005317	L	partial	1	221011854	221012509	-	Pfam	PF13855	Leucine rich repeat	Leucine-rich repeat	52	108	QLQHLNLAENNFVGEIPHQFGNLTKLRFLDLGSNVLDVINLDWLHNLRMLSYLDMSS	1.9e-09	MAASFLGGAKTAVHGVESIATTLQLQHLNYLDLSSNYFGDNQIPEFIGSLTQLQHLNLAENNFVGEIPHQFGNLTKLRFLDLGSNVLDVINLDWLHNLRMLSYLDMSSVNLTNVNWLQAVNKLSFLTELRLSMCGLSGVTSLSIPLANSSSMNLAVVDLSVNDYVSSSEFHWLFNFSSSLVDIDISSNSL	190	656	https://onlinelibrary.wiley.com/doi/full/10.1111/pbi.13558
PlantKGA_431	Apiales	Araliaceae	Panax	notoginseng	Panax notoginseng		三七	chromosome	Yes	转录本	Pno01G005584t1	Pno01G005584t11288xxPlantKGA_431	Pno01G005584	L	partial	1	23852171	23855500	-	Pfam	PF13516	Leucine Rich repeat	Leucine-rich repeat	568	587	LNDLDMSKCSISDSGVAALS	0.36	MPTLINYTGEDEFYSGGSACSANSGLLFLIGSNADVYSPPRKRSCISGSFAFEEHMVEEKEPSIEVLPDECLFEIFRRLPGGQDRSASACVSKHWLMLLSRVHNSEIFRRKSTQAGPEVNESTNVIEMISADKNREDECDGYLTRCLEGKKATDLRLAAIAVGTATHGGLGKLSIRGSNSTCGVTDLGLSSIAHGCPSLKVLSLWNVPSTGDEGLLKIAQECHLLEKLDLCQCPSISNKGVVAIAENCPNLTALTIESCTKIGNVSLQAIGRYCPKLQSITIKDCALVGDQGIANLLSSASSVLSKVRFHALKITDFSLAVIVNYGKAITNLVLSGLQNVSQKGFWALGNARGLNTLGSLIITSCRGTTDVSLEAIGKGCPNLKQMSLKKCCFVSDKGL…	650	3330	https://onlinelibrary.wiley.com/doi/full/10.1111/pbi.13558
PlantKGA_431	Apiales	Araliaceae	Panax	notoginseng	Panax notoginseng		三七	chromosome	Yes	转录本	Pno01G007249t1	Pno01G007249t11288xxPlantKGA_431	Pno01G007249	L	partial	1	37165293	37180126	+	Pfam	PF08263	Leucine rich repeat N-terminal domain	Leucine-rich repeat-containing N-terminal, plant-type	25	64	NSEGDALYALRRSLTDPDNVLQSWDPNLVSPCTWFHITCN	1e-11	MAGGFSTLGGVVVALTIIITVASGNSEGDALYALRRSLTDPDNVLQSWDPNLVSPCTWFHITCNQDNHVTRVDLGNSNLSGHLVPDLGRLEHLQYLELYKNNIQGTIPIELGNLKSLISLDLYNNNISGTIPPSLGKLKSLVFLRLNDNHLVGKIPRELVGISSLKVVDVSSNNLCGTIPTMGPFEHIPLTNFENNRRLEGPELQGLASFGLLIFQLFLYPLVERIVGLSRIGAVVTIPLLSSYPYIAMLSGLYLSLALDCASVPKNVLSTPAKLCQLFFTEAASSKWTMKENNVEEDRKANLLRFPSSETLSSITKDKRGWLLDPISIALRSGIPGTFLIGLKRVMKFMCFSS	354	14834	https://onlinelibrary.wiley.com/doi/full/10.1111/pbi.13558
PlantKGA_431	Apiales	Araliaceae	Panax	notoginseng	Panax notoginseng		三七	chromosome	Yes	转录本	Pno01G007249t1	Pno01G007249t11288xxPlantKGA_431	Pno01G007249	L	partial	1	37165293	37180126	+	Pfam	PF13855	Leucine rich repeat	Leucine-rich repeat	92	151	HLQYLELYKNNIQGTIPIELGNLKSLISLDLYNNNISGTIPPSLGKLKSLVFLRLNDNHL	2.8e-07	MAGGFSTLGGVVVALTIIITVASGNSEGDALYALRRSLTDPDNVLQSWDPNLVSPCTWFHITCNQDNHVTRVDLGNSNLSGHLVPDLGRLEHLQYLELYKNNIQGTIPIELGNLKSLISLDLYNNNISGTIPPSLGKLKSLVFLRLNDNHLVGKIPRELVGISSLKVVDVSSNNLCGTIPTMGPFEHIPLTNFENNRRLEGPELQGLASFGLLIFQLFLYPLVERIVGLSRIGAVVTIPLLSSYPYIAMLSGLYLSLALDCASVPKNVLSTPAKLCQLFFTEAASSKWTMKENNVEEDRKANLLRFPSSETLSSITKDKRGWLLDPISIALRSGIPGTFLIGLKRVMKFMCFSS	354	14834	https://onlinelibrary.wiley.com/doi/full/10.1111/pbi.13558
PlantKGA_431	Apiales	Araliaceae	Panax	notoginseng	Panax notoginseng		三七	chromosome	Yes	转录本	Pno01G008720t1	Pno01G008720t11288xxPlantKGA_431	Pno01G008720	L	partial	1	48000637	48012962	+	Pfam	PF13516	Leucine Rich repeat	Leucine-rich repeat	114	136	LQNLEHLNLNGCQKISDKGIEAI	0.00048	MEKKQTKETERIETWRRETIIPEVMKIVSSRLILPQKDLISLLLVSSSLHRSLVSYTSLWLVIDFHEFNNAGNRLLDALSLSRYQNLKQINLEFAQGVEDKHLDILKSKFKDSLQNLEHLNLNGCQKISDKGIEAITTACPTLKVFSIYWNVRVTDIGINYLVKNCKHIVDLNLSGCKNISDKSLQLIANNYQNLESLNLTRCIKLTDAGLQQILLKCSALRTLNLYAISSFTDEAYKKLSLLANLRFLDLCGAQNLSDEGLSCVAKCKNLVSLNLTWCVRVTDVGVISIAQSCTSLEFLSLFGIVGVTDKCLEALSRSCSKIITTLDVNGCVGIKRRSREELLQLFPHLRCFKVHS	357	12326	https://onlinelibrary.wiley.com/doi/full/10.1111/pbi.13558
PlantKGA_431	Apiales	Araliaceae	Panax	notoginseng	Panax notoginseng		三七	chromosome	Yes	转录本	Pno01G008720t1	Pno01G008720t11288xxPlantKGA_431	Pno01G008720	L	partial	1	48000637	48012962	+	Pfam	PF13516	Leucine Rich repeat	Leucine-rich repeat	193	214	QNLESLNLTRCIKLTDAGLQQI	1.9	MEKKQTKETERIETWRRETIIPEVMKIVSSRLILPQKDLISLLLVSSSLHRSLVSYTSLWLVIDFHEFNNAGNRLLDALSLSRYQNLKQINLEFAQGVEDKHLDILKSKFKDSLQNLEHLNLNGCQKISDKGIEAITTACPTLKVFSIYWNVRVTDIGINYLVKNCKHIVDLNLSGCKNISDKSLQLIANNYQNLESLNLTRCIKLTDAGLQQILLKCSALRTLNLYAISSFTDEAYKKLSLLANLRFLDLCGAQNLSDEGLSCVAKCKNLVSLNLTWCVRVTDVGVISIAQSCTSLEFLSLFGIVGVTDKCLEALSRSCSKIITTLDVNGCVGIKRRSREELLQLFPHLRCFKVHS	357	12326	https://onlinelibrary.wiley.com/doi/full/10.1111/pbi.13558
PlantKGA_431	Apiales	Araliaceae	Panax	notoginseng	Panax notoginseng		三七	chromosome	Yes	转录本	Pno01G008720t1	Pno01G008720t11288xxPlantKGA_431	Pno01G008720	L	partial	1	48000637	48012962	+	Pfam	PF13516	Leucine Rich repeat	Leucine-rich repeat	166	189	CKHIVDLNLSGCKNISDKSLQLIA	0.26	MEKKQTKETERIETWRRETIIPEVMKIVSSRLILPQKDLISLLLVSSSLHRSLVSYTSLWLVIDFHEFNNAGNRLLDALSLSRYQNLKQINLEFAQGVEDKHLDILKSKFKDSLQNLEHLNLNGCQKISDKGIEAITTACPTLKVFSIYWNVRVTDIGINYLVKNCKHIVDLNLSGCKNISDKSLQLIANNYQNLESLNLTRCIKLTDAGLQQILLKCSALRTLNLYAISSFTDEAYKKLSLLANLRFLDLCGAQNLSDEGLSCVAKCKNLVSLNLTWCVRVTDVGVISIAQSCTSLEFLSLFGIVGVTDKCLEALSRSCSKIITTLDVNGCVGIKRRSREELLQLFPHLRCFKVHS	357	12326	https://onlinelibrary.wiley.com/doi/full/10.1111/pbi.13558
PlantKGA_431	Apiales	Araliaceae	Panax	notoginseng	Panax notoginseng		三七	chromosome	Yes	转录本	Pno01G008720t1	Pno01G008720t11288xxPlantKGA_431	Pno01G008720	L	partial	1	48000637	48012962	+	Pfam	PF13516	Leucine Rich repeat	Leucine-rich repeat	267	291	KCKNLVSLNLTWCVRVTDVGVISIA	0.0021	MEKKQTKETERIETWRRETIIPEVMKIVSSRLILPQKDLISLLLVSSSLHRSLVSYTSLWLVIDFHEFNNAGNRLLDALSLSRYQNLKQINLEFAQGVEDKHLDILKSKFKDSLQNLEHLNLNGCQKISDKGIEAITTACPTLKVFSIYWNVRVTDIGINYLVKNCKHIVDLNLSGCKNISDKSLQLIANNYQNLESLNLTRCIKLTDAGLQQILLKCSALRTLNLYAISSFTDEAYKKLSLLANLRFLDLCGAQNLSDEGLSCVAKCKNLVSLNLTWCVRVTDVGVISIAQSCTSLEFLSLFGIVGVTDKCLEALSRSCSKIITTLDVNGCVGIKRRSREELLQLFPHLRCFKVHS	357	12326	https://onlinelibrary.wiley.com/doi/full/10.1111/pbi.13558
PlantKGA_431	Apiales	Araliaceae	Panax	notoginseng	Panax notoginseng		三七	chromosome	Yes	转录本	Pno01G012867t1	Pno01G012867t11288xxPlantKGA_431	Pno01G012867	L	partial	1	75136755	75142149	-	Pfam	PF13855	Leucine rich repeat	Leucine-rich repeat	198	254	NMEYLILKNCLITGSIPEHLGGLSNLKTLDLSINRLTGQIPDSMVSLNKMSFLFLFH	4.5e-07	MTQDVEMKELLAPSNSIIFTTPSPLQHLKEIALLIEAGAYAREVRRILRAVRLTIALRKKLKATMISHFLSFVLLPGSELHSRLSSYLPKEAESALNAGYRRKHVSENDSDGTHHSADENLGSMSSLRRPRIDGSELSGKIPDFIWNWTNITRLDLEGTSMEGPIPSNISILKNLKELRISDLTGSGTSFPDLQDMKNMEYLILKNCLITGSIPEHLGGLSNLKTLDLSINRLTGQIPDSMVSLNKMSFLFLFHFFNNYESIEHEVYTANLNFLEENDDKLDLT	284	5395	https://onlinelibrary.wiley.com/doi/full/10.1111/pbi.13558
PlantKGA_431	Apiales	Araliaceae	Panax	notoginseng	Panax notoginseng		三七	chromosome	Yes	转录本	Pno01G014290t1	Pno01G014290t11288xxPlantKGA_431	Pno01G014290	L	partial	1	83718576	83721176	+	Pfam	PF08263	Leucine rich repeat N-terminal domain	Leucine-rich repeat-containing N-terminal, plant-type	15	35	DLSSWGSEGEECCKWDGVECS	2e-05	MFKRGIIVLVKFGQDLSSWGSEGEECCKWDGVECSNLTGHVTSLNLPFVKHISIKMTSSLIELKSLNSLTLSQNDFGSHHEEASSSNPQTAKSSTNPPPKTSPTPYEFFKNKEFYSHANTPSTVIELELRKIRTRCHIPDTHLVRAPRSEEKMYQRPEGWTAVPMAILEKGVRFPLHIFLVTLLAISKQASKVGEKFERRSLVSTPSSNKGWHKGWFFIKGPEIASIPNWATDEKVSADFGDIPEERIIEMIELFDNFPKEEWKYGLLSKQSWLYNHKLSLIKPSPEEERDYEDFLSEKSVEDTETPLMEASLEDNPPTKTPTVETTNAESQPLDPKAEEPIIPEEIFDLAERGEPSENPDQLSYNQILNPYQNLNQPLIQHLLVGVCLIYLQTIESNS…	404	2601	https://onlinelibrary.wiley.com/doi/full/10.1111/pbi.13558
PlantKGA_431	Apiales	Araliaceae	Panax	notoginseng	Panax notoginseng		三七	chromosome	Yes	转录本	Pno02G000759t1	Pno02G000759t11288xxPlantKGA_431	Pno02G000759	L	partial	2	11916797	11917630	-	Pfam	PF13855	Leucine rich repeat	Leucine-rich repeat	98	156	LKELSLPNNHLIDQVPPQIVDCKKLEILNLQNNQFSGEVPSGLSSLIRLRILDLSSNKF	1.1e-07	MASGHHLSHFSFFTLLLLANARLNLDPSDQNALLTIQEDLGIMGQRHVLESNPCNSAGVFCERRISNNSYVLRVTRIIFKSQKLNGFLSPAIEKLSDLKELSLPNNHLIDQVPPQIVDCKKLEILNLQNNQFSGEVPSGLSSLIRLRILDLSSNKFSGNLNFLKYFPNMEKLWLSNNMFTGEVPVSLHSFRNLRFFNISGNKFLQNPLPVLKGMEFLSAELSEEEETAPKRYSFAENPIVRNQNSAMAPHASTAGPAQAPSNTPTQHKKKIRKAIRS	277	834	https://onlinelibrary.wiley.com/doi/full/10.1111/pbi.13558
PlantKGA_431	Apiales	Araliaceae	Panax	notoginseng	Panax notoginseng		三七	chromosome	Yes	转录本	Pno02G000979t1	Pno02G000979t11288xxPlantKGA_431	Pno02G000979	L	partial	2	12443761	12448268	-	Pfam	PF13855	Leucine rich repeat	Leucine-rich repeat	213	269	VERIDLSDQQLRFLPEAFGKIRTLVALNLSSNQLEVVPDSIAGLENLEELNLSSNLL	5e-09	MDPNPNSFPILSYVMSKLPSFGARRSTSDSSEIDIEQPPLHSPTFSASKEPYFELTEQMPHLTDPKLLADMRAAVVDVSQTRSILKTLGDRPDHESVDTARTKLAEIEFKLSEQLDEISLSPLTSDAEKDEDSRKKAAERQKQMYKAVISLDEMHEAYGKLLKQAEERLQKIYDLAVAGRGSNAAEENVPAVVAEEVNEEVIRILQDASEKGVERIDLSDQQLRFLPEAFGKIRTLVALNLSSNQLEVVPDSIAGLENLEELNLSSNLLEILPESIGLLLNMKVLKVSSNKLTALPDSICHCRSLVELDASFNKVTYLPTNIGYELVNLRRLSIQLNKIRSLPTSIGEMSSLCLLDVHFNELRGLPLSIGRLTNLEILNLSSNFNDLTELPDTFGDLIN…	510	4508	https://onlinelibrary.wiley.com/doi/full/10.1111/pbi.13558
PlantKGA_431	Apiales	Araliaceae	Panax	notoginseng	Panax notoginseng		三七	chromosome	Yes	转录本	Pno02G000979t1	Pno02G000979t11288xxPlantKGA_431	Pno02G000979	L	partial	2	12443761	12448268	-	Pfam	PF13855	Leucine rich repeat	Leucine-rich repeat	391	432	PDTFGDLINLKELDLSNNQIHALPITFGRLDNLVKLNLEENP	4.8e-08	MDPNPNSFPILSYVMSKLPSFGARRSTSDSSEIDIEQPPLHSPTFSASKEPYFELTEQMPHLTDPKLLADMRAAVVDVSQTRSILKTLGDRPDHESVDTARTKLAEIEFKLSEQLDEISLSPLTSDAEKDEDSRKKAAERQKQMYKAVISLDEMHEAYGKLLKQAEERLQKIYDLAVAGRGSNAAEENVPAVVAEEVNEEVIRILQDASEKGVERIDLSDQQLRFLPEAFGKIRTLVALNLSSNQLEVVPDSIAGLENLEELNLSSNLLEILPESIGLLLNMKVLKVSSNKLTALPDSICHCRSLVELDASFNKVTYLPTNIGYELVNLRRLSIQLNKIRSLPTSIGEMSSLCLLDVHFNELRGLPLSIGRLTNLEILNLSSNFNDLTELPDTFGDLIN…	510	4508	https://onlinelibrary.wiley.com/doi/full/10.1111/pbi.13558
PlantKGA_431	Apiales	Araliaceae	Panax	notoginseng	Panax notoginseng		三七	chromosome	Yes	转录本	Pno02G001256t1	Pno02G001256t11288xxPlantKGA_431	Pno02G001256	L	partial	2	1320378	1323133	-	Pfam	PF13855	Leucine rich repeat	Leucine-rich repeat	118	175	LAVFHINSNRFCGIVPKSFKRLKLLFELDLSNNRFVGGFPNVVLSLPSLKFLDLRFNE	2.1e-08	MLLPPRLRSLFFTLLFCSLLVQICCVFADNEDVISMLQFENPRIRQAYIALQAWKSTIFSDPFNLTANWTGPNVCSYGGVFCAAFPSNPSIRVVASIDLNHADIAGYLPDELGLLIDLAVFHINSNRFCGIVPKSFKRLKLLFELDLSNNRFVGGFPNVVLSLPSLKFLDLRFNEFEGSVPSKLFDKPLDAIFLNDNRFQFGIPKNLGNSPVSVLVFANNNLGGCIPGSIGKMGKTLNEIILMNDNLTECLPSEIGMLNKLTVFDVSFNHLQGSLPSKVGSMKSLEQLDVAHNSFTGVIPATVCQLPRLQNFTYSFNYFTGEAPVCAAPVGKEVLDGRKNCIPGKTDQRSSRECSSKEARPVDCSKSKCSSRGGSSPGSHGSPPVKLPSPPQSRTKTKP…	710	2756	https://onlinelibrary.wiley.com/doi/full/10.1111/pbi.13558
PlantKGA_431	Apiales	Araliaceae	Panax	notoginseng	Panax notoginseng		三七	chromosome	Yes	转录本	Pno02G001849t1	Pno02G001849t11288xxPlantKGA_431	Pno02G001849	L	partial	2	147951365	147957937	-	Pfam	PF13855	Leucine rich repeat	Leucine-rich repeat	80	134	DLSDNLLYGDIPFSISKLKQLELLNLKNNQLTGSIPSTLTQIPNLKTLSLQGNKL	3.1e-07	MLAGHGLRSKTRDSFSRAFRKKGTIHLLTYLRTYHIDDYSTLGLTAPSIRVCPTSSTMAAPVRSGTSPSVPSALKSISRDLSDNLLYGDIPFSISKLKQLELLNLKNNQLTGSIPSTLTQIPNLKTLSLQGNKLTGKIPEVIGLMQAQVVLDLSENELIGSITPIIGNLSYTGKLYLHGNKLTGPIPPELGNMSKLSYLQLNDNKLIGARDQFVIRTGSVTEVLWNDARQLKAGPAYKRDYWTESFVQWSPLGTYLATVHSSHELSNPRDTHVGCEVAMMLRYGLSRPNISVGLDGKKLEPEGNVLLASIEDMQYAVTLDVLHMRSLGENFEKLINSNSMASKPASKRQCREIFGTTPPTQTFDRRKFISVAVTDRYDYMVTKALTSEQGLAPDHVDGE…	433	6573	https://onlinelibrary.wiley.com/doi/full/10.1111/pbi.13558
PlantKGA_431	Apiales	Araliaceae	Panax	notoginseng	Panax notoginseng		三七	chromosome	Yes	转录本	Pno02G002609t3	Pno02G002609t31288xxPlantKGA_431	Pno02G002609	L	partial	2	16540898	16546157	+	Pfam	PF14580	Leucine-rich repeat	-	59	164	GVSSLEQFPRLQNLQKLILSDNRISSGLEFLVEAGLESLRDLDLSNNRIQDINDLRPLAELKIVSLDLYECPVTRIKDYRSRVFGLIKSLRYLDKMDADENERPES	6e-13	MDEIWERAVETALDGQSDAASVRTLTLDGAVKCVHGRLPPPSLFEKFHNLQHLSIANIGVSSLEQFPRLQNLQKLILSDNRISSGLEFLVEAGLESLRDLDLSNNRIQDINDLRPLAELKIVSLDLYECPVTRIKDYRSRVFGLIKSLRYLDKMDADENERPESDDDDDEEDEEEEEEDEDDPGSGEVDGEDRPHRMTNGHSVGHDGVVYVDEDEESDADEEETETLRGSNGLNHQSNGFRVEAVVEEEEHEEDDEEEIDEEDDDDEDVVEVHEIEDSDDEDGVEDDDDDVEDDDEEVDNDEVEFAEPDSTGRITSTEGEIDAHEQGEEDGDDEDDNGETGEEELEVEEDGEYEEEDAEDEWQEEDDTGYLLQPVVQVEEDAGGSDMDAGNEDADDGND…	462	5260	https://onlinelibrary.wiley.com/doi/full/10.1111/pbi.13558
PlantKGA_431	Apiales	Araliaceae	Panax	notoginseng	Panax notoginseng		三七	chromosome	Yes	转录本	Pno02G003569t1	Pno02G003569t11288xxPlantKGA_431	Pno02G003569	L	partial	2	187076751	187078678	-	Pfam	PF13855	Leucine rich repeat	Leucine-rich repeat	129	189	PKLHYIYIENNKLSGHITRWIGNLTQLDALSLEGNRFTGVIPISISELTQLTQLKLGGNLL	1.8e-08	MPYLSHLPYSLFLLFSLLTHGFLTPTAATCHVDDESGLLAFKSGITSDPSGMLSSWKQGTDCCTWPGISCQPGNRVTSLSVVGQPDKPNEYLSGTISPKLSKLQSLGGIYLQNLRNITGPFPGFLFRLPKLHYIYIENNKLSGHITRWIGNLTQLDALSLEGNRFTGVIPISISELTQLTQLKLGGNLLIGTIPVGIRRIKGLNVLSLKQNQLSSTIPDFFSSFSNLRLLELSYNKLSGQIPASISTLAPYLTFLELGHNSLTGKIPDFLGKFQTLDTLDLSSNHFTGTVPKSFANLTKIFNLDLSNNHLVDPFPELKVLGIESLDLSYNQFHLVQIPKWVTSSPIIYSLKLAKCGLKLKLDDWKPAQTYFYDYIDLSENEISGSPVKLLNQTEFSVGF…	481	1928	https://onlinelibrary.wiley.com/doi/full/10.1111/pbi.13558
PlantKGA_431	Apiales	Araliaceae	Panax	notoginseng	Panax notoginseng		三七	chromosome	Yes	转录本	Pno02G003569t1	Pno02G003569t11288xxPlantKGA_431	Pno02G003569	L	partial	2	187076751	187078678	-	Pfam	PF13855	Leucine rich repeat	Leucine-rich repeat	202	245	GLNVLSLKQNQLSSTIPDFFSSFSNLRLLELSYNKLSGQIPASI	1.6e-06	MPYLSHLPYSLFLLFSLLTHGFLTPTAATCHVDDESGLLAFKSGITSDPSGMLSSWKQGTDCCTWPGISCQPGNRVTSLSVVGQPDKPNEYLSGTISPKLSKLQSLGGIYLQNLRNITGPFPGFLFRLPKLHYIYIENNKLSGHITRWIGNLTQLDALSLEGNRFTGVIPISISELTQLTQLKLGGNLLIGTIPVGIRRIKGLNVLSLKQNQLSSTIPDFFSSFSNLRLLELSYNKLSGQIPASISTLAPYLTFLELGHNSLTGKIPDFLGKFQTLDTLDLSSNHFTGTVPKSFANLTKIFNLDLSNNHLVDPFPELKVLGIESLDLSYNQFHLVQIPKWVTSSPIIYSLKLAKCGLKLKLDDWKPAQTYFYDYIDLSENEISGSPVKLLNQTEFSVGF…	481	1928	https://onlinelibrary.wiley.com/doi/full/10.1111/pbi.13558
PlantKGA_431	Apiales	Araliaceae	Panax	notoginseng	Panax notoginseng		三七	chromosome	Yes	转录本	Pno02G003569t1	Pno02G003569t11288xxPlantKGA_431	Pno02G003569	L	partial	2	187076751	187078678	-	Pfam	PF13855	Leucine rich repeat	Leucine-rich repeat	251	310	YLTFLELGHNSLTGKIPDFLGKFQTLDTLDLSSNHFTGTVPKSFANLTKIFNLDLSNNHL	1.7e-09	MPYLSHLPYSLFLLFSLLTHGFLTPTAATCHVDDESGLLAFKSGITSDPSGMLSSWKQGTDCCTWPGISCQPGNRVTSLSVVGQPDKPNEYLSGTISPKLSKLQSLGGIYLQNLRNITGPFPGFLFRLPKLHYIYIENNKLSGHITRWIGNLTQLDALSLEGNRFTGVIPISISELTQLTQLKLGGNLLIGTIPVGIRRIKGLNVLSLKQNQLSSTIPDFFSSFSNLRLLELSYNKLSGQIPASISTLAPYLTFLELGHNSLTGKIPDFLGKFQTLDTLDLSSNHFTGTVPKSFANLTKIFNLDLSNNHLVDPFPELKVLGIESLDLSYNQFHLVQIPKWVTSSPIIYSLKLAKCGLKLKLDDWKPAQTYFYDYIDLSENEISGSPVKLLNQTEFSVGF…	481	1928	https://onlinelibrary.wiley.com/doi/full/10.1111/pbi.13558
PlantKGA_431	Apiales	Araliaceae	Panax	notoginseng	Panax notoginseng		三七	chromosome	Yes	转录本	Pno02G003569t1	Pno02G003569t11288xxPlantKGA_431	Pno02G003569	L	partial	2	187076751	187078678	-	Pfam	PF08263	Leucine rich repeat N-terminal domain	Leucine-rich repeat-containing N-terminal, plant-type	33	70	DDESGLLAFKSGITSDPSGMLSSWKQGTDCCTWPGISC	3.1e-12	MPYLSHLPYSLFLLFSLLTHGFLTPTAATCHVDDESGLLAFKSGITSDPSGMLSSWKQGTDCCTWPGISCQPGNRVTSLSVVGQPDKPNEYLSGTISPKLSKLQSLGGIYLQNLRNITGPFPGFLFRLPKLHYIYIENNKLSGHITRWIGNLTQLDALSLEGNRFTGVIPISISELTQLTQLKLGGNLLIGTIPVGIRRIKGLNVLSLKQNQLSSTIPDFFSSFSNLRLLELSYNKLSGQIPASISTLAPYLTFLELGHNSLTGKIPDFLGKFQTLDTLDLSSNHFTGTVPKSFANLTKIFNLDLSNNHLVDPFPELKVLGIESLDLSYNQFHLVQIPKWVTSSPIIYSLKLAKCGLKLKLDDWKPAQTYFYDYIDLSENEISGSPVKLLNQTEFSVGF…	481	1928	https://onlinelibrary.wiley.com/doi/full/10.1111/pbi.13558
PlantKGA_431	Apiales	Araliaceae	Panax	notoginseng	Panax notoginseng		三七	chromosome	Yes	转录本	Pno02G003810t1	Pno02G003810t11288xxPlantKGA_431	Pno02G003810	L	partial	2	191737990	191738843	+	Pfam	PF13516	Leucine Rich repeat	Leucine-rich repeat	163	184	NNLVEIHLERLQVSDVGLSAIS	1.9	MAARGRSELPSSCAQRTGGPALYSSGPLALRCDRRSKSLNDDALTLISLKCPNLTRLKLRGCRESPSSCLFGAEGLNSVLDHCSSLKELSVKRLRGINDSGAAEPIGPGVAASSLKSICLKELYNGQCFGPLIIGSKNLKSLKLLRCLGDWDRLLETVASGKNNLVEIHLERLQVSDVGLSAISNCPELEILHIVKTPECTNAGIVSIA	209	854	https://onlinelibrary.wiley.com/doi/full/10.1111/pbi.13558
PlantKGA_431	Apiales	Araliaceae	Panax	notoginseng	Panax notoginseng		三七	chromosome	Yes	转录本	Pno02G003858t1	Pno02G003858t11288xxPlantKGA_431	Pno02G003858	L	partial	2	193191858	193192844	-	Pfam	PF13855	Leucine rich repeat	Leucine-rich repeat	33	91	LSYLSLAHNKLQGSIPQTLGNLISLEFLDLSNNNLSGGIPKSLEALRYLQFFNVSFNRL	1.3e-07	MEVQNLKVVTEIGLSWNQLLGSIPTTIGGAQMLSYLSLAHNKLQGSIPQTLGNLISLEFLDLSNNNLSGGIPKSLEALRYLQFFNVSFNRLQGEIPTGGIFANITARSFMQNDALCGAPRLQVQPCKTKTLQQSQSKFVSLLKYILPSITVAILALALIFEIVVVVVAAAAIVVVVVVVVVVVVIVVVVVVVEVVVV	197	987	https://onlinelibrary.wiley.com/doi/full/10.1111/pbi.13558
PlantKGA_431	Apiales	Araliaceae	Panax	notoginseng	Panax notoginseng		三七	chromosome	Yes	转录本	Pno02G003859t1	Pno02G003859t11288xxPlantKGA_431	Pno02G003859	L	partial	2	193192983	193194415	-	Pfam	PF13855	Leucine rich repeat	Leucine-rich repeat	103	162	LLEVLHLSFNQLNGKIPSNLGKFRRLQQLSLSYNKFTGSIPQEIGNLTMLNDLYLGGNNL	6.4e-07	MPRRGLVGPRRGIFRTPEKVLPSIAGSFQKLVNSILAIDDFAGSIPSEIGNLINLEMLSFQNSSLRGPIPSAIFNISSMRRIDFSNNIMSGNLSMGDHYDLPLLEVLHLSFNQLNGKIPSNLGKFRRLQQLSLSYNKFTGSIPQEIGNLTMLNDLYLGGNNLTGSIPEEIGSLNLLRLSLHGSSHNGLIPFQISNMSTLKKLDLSENNFSGHLPSSTGHLLPNLEELYLGASKLNGTIPSFVSNATKLVILGMTRNSFSGSIPNTIGNLRLLQRLLLGENNLTRESSTPELKFISSLSNCQYLEILSVAQNQLNGVLPTSVGNLSTSLYRFEAFGCNIKGEIPSGIGNLSSLEPILLDNNELTGPIPPIVGGLKNLARLYLEHNKLQGSIPNNLCQFKN…	416	1433	https://onlinelibrary.wiley.com/doi/full/10.1111/pbi.13558
PlantKGA_431	Apiales	Araliaceae	Panax	notoginseng	Panax notoginseng		三七	chromosome	Yes	转录本	Pno02G003860t1	Pno02G003860t11288xxPlantKGA_431	Pno02G003860	L	partial	2	193195002	193195804	-	Pfam	PF08263	Leucine rich repeat N-terminal domain	Leucine-rich repeat-containing N-terminal, plant-type	8	52	NTDQLSVLAIKAHITNDPYKILAKNWSTATSAAAAAICSWIGVSC	6.6e-05	MACSTNLNTDQLSVLAIKAHITNDPYKILAKNWSTATSAAAAAICSWIGVSCGVKHQRVAALNLSNMGLNGTIPPVIGNLTFLTSLDLTSNNFHGSIPKELACLRRLEEIYLEFNNLTGESLGYNNLNGHIPKEIGNLSDLYFLDLKYNQLSGSILYVIFNMSSMCDQFHGQIPTTIYKCQKLERILFSYNGFSGRIPREIGNMTMLKWLYLGVNQFEDMIYALIACF	228	803	https://onlinelibrary.wiley.com/doi/full/10.1111/pbi.13558
PlantKGA_431	Apiales	Araliaceae	Panax	notoginseng	Panax notoginseng		三七	chromosome	Yes	转录本	Pno02G003860t1	Pno02G003860t11288xxPlantKGA_431	Pno02G003860	L	partial	2	193195002	193195804	-	Pfam	PF13855	Leucine rich repeat	Leucine-rich repeat	59	117	VAALNLSNMGLNGTIPPVIGNLTFLTSLDLTSNNFHGSIPKELACLRRLEEIYLEFNNL	1.9e-06	MACSTNLNTDQLSVLAIKAHITNDPYKILAKNWSTATSAAAAAICSWIGVSCGVKHQRVAALNLSNMGLNGTIPPVIGNLTFLTSLDLTSNNFHGSIPKELACLRRLEEIYLEFNNLTGESLGYNNLNGHIPKEIGNLSDLYFLDLKYNQLSGSILYVIFNMSSMCDQFHGQIPTTIYKCQKLERILFSYNGFSGRIPREIGNMTMLKWLYLGVNQFEDMIYALIACF	228	803	https://onlinelibrary.wiley.com/doi/full/10.1111/pbi.13558
PlantKGA_431	Apiales	Araliaceae	Panax	notoginseng	Panax notoginseng		三七	chromosome	Yes	转录本	Pno02G003906t1	Pno02G003906t11288xxPlantKGA_431	Pno02G003906	L	partial	2	194015447	194016510	+	Pfam	PF08263	Leucine rich repeat N-terminal domain	Leucine-rich repeat-containing N-terminal, plant-type	41	81	TDQSVLLILKSQIISDPNPSFTANWSIPQASCCSWVGVTCS	4e-10	MKSSIICFSFYVVVLLLVYNHTTIFRRCSTTTHHVSLNITTDQSVLLILKSQIISDPNPSFTANWSIPQASCCSWVGVTCSTRHGRVMALDLSNMGLIGTIPPEIGNLSFLVSFDLTNNNFNGSLPKELSNLRRLKEIYFRNNSFGGELPSWLSKLPNLKYLSLSFNSFTGTIPPSLSNLSKLERLSLGRNPLQGNIPGDFGSFKNLQVLDLQSNQLSGSIPLNVFNISTLRILALTNNSLSVNLPRDICHGIPKIQELYLSSNQLFGSIPSGLHECSELQLLSLAHNKFSGIIPREIGNLTLLKYLELHDNHLKGFRLCEVEILKNWKVK	331	1064	https://onlinelibrary.wiley.com/doi/full/10.1111/pbi.13558
PlantKGA_431	Apiales	Araliaceae	Panax	notoginseng	Panax notoginseng		三七	chromosome	Yes	转录本	Pno02G003906t1	Pno02G003906t11288xxPlantKGA_431	Pno02G003906	L	partial	2	194015447	194016510	+	Pfam	PF13855	Leucine rich repeat	Leucine-rich repeat	206	266	NLQVLDLQSNQLSGSIPLNVFNISTLRILALTNNSLSVNLPRDICHGIPKIQELYLSSNQL	1.6e-07	MKSSIICFSFYVVVLLLVYNHTTIFRRCSTTTHHVSLNITTDQSVLLILKSQIISDPNPSFTANWSIPQASCCSWVGVTCSTRHGRVMALDLSNMGLIGTIPPEIGNLSFLVSFDLTNNNFNGSLPKELSNLRRLKEIYFRNNSFGGELPSWLSKLPNLKYLSLSFNSFTGTIPPSLSNLSKLERLSLGRNPLQGNIPGDFGSFKNLQVLDLQSNQLSGSIPLNVFNISTLRILALTNNSLSVNLPRDICHGIPKIQELYLSSNQLFGSIPSGLHECSELQLLSLAHNKFSGIIPREIGNLTLLKYLELHDNHLKGFRLCEVEILKNWKVK	331	1064	https://onlinelibrary.wiley.com/doi/full/10.1111/pbi.13558
PlantKGA_431	Apiales	Araliaceae	Panax	notoginseng	Panax notoginseng		三七	chromosome	Yes	转录本	Pno02G003906t1	Pno02G003906t11288xxPlantKGA_431	Pno02G003906	L	partial	2	194015447	194016510	+	Pfam	PF13855	Leucine rich repeat	Leucine-rich repeat	150	193	PSWLSKLPNLKYLSLSFNSFTGTIPPSLSNLSKLERLSLGRNPL	7.2e-07	MKSSIICFSFYVVVLLLVYNHTTIFRRCSTTTHHVSLNITTDQSVLLILKSQIISDPNPSFTANWSIPQASCCSWVGVTCSTRHGRVMALDLSNMGLIGTIPPEIGNLSFLVSFDLTNNNFNGSLPKELSNLRRLKEIYFRNNSFGGELPSWLSKLPNLKYLSLSFNSFTGTIPPSLSNLSKLERLSLGRNPLQGNIPGDFGSFKNLQVLDLQSNQLSGSIPLNVFNISTLRILALTNNSLSVNLPRDICHGIPKIQELYLSSNQLFGSIPSGLHECSELQLLSLAHNKFSGIIPREIGNLTLLKYLELHDNHLKGFRLCEVEILKNWKVK	331	1064	https://onlinelibrary.wiley.com/doi/full/10.1111/pbi.13558
PlantKGA_431	Apiales	Araliaceae	Panax	notoginseng	Panax notoginseng		三七	chromosome	Yes	转录本	Pno02G003913t1	Pno02G003913t11288xxPlantKGA_431	Pno02G003913	L	partial	2	194120726	194132449	+	Pfam	PF13855	Leucine rich repeat	Leucine-rich repeat	897	954	NLANLSLANNRLQGPIVDTFKSLVSLEYLDLSHNNLSDVIPKSLEALLYLRYFNVCFN	2.4e-09	MAKLAETYACIPSTERGRGILISGDAKSNVILYCNGRSVIIRYLDRPLDVSVYADHAYQTTVARFSPNGEWIASADVSGTVRIWGTHNDHVLKVEFRVLTGRIDDLQWSPDGMRIVASGDGKGKSFVRAFMWDSGTNVGEFDGHSRRVLSCAFKPTRPFRIVTCGEDFLVNFYEGPPFKFKLSHRDHTNFVNCVRFSPDGSKFITVSSDKKGLVYDAKTAEKIGELSSEDGHKGSIYAVSWSPDSKQVLTVSADKSAKIWVISEDGHGEVTKTMTCPSSGGVEDMLVGCLWQNDYLVTVSLGGTISIFSASDPDKAPVTMSGHMKNINSLAVLKSSPKVILSTSYDGLIVKWIQGIGFNGRLERKVTGQIKCFAAVDEEIVSSGFDNKVWRVSLLGDQC…	1035	11724	https://onlinelibrary.wiley.com/doi/full/10.1111/pbi.13558
PlantKGA_431	Apiales	Araliaceae	Panax	notoginseng	Panax notoginseng		三七	chromosome	Yes	转录本	Pno02G003913t1	Pno02G003913t11288xxPlantKGA_431	Pno02G003913	L	partial	2	194120726	194132449	+	Pfam	PF13855	Leucine rich repeat	Leucine-rich repeat	777	836	ELQVLGLGENKIGESIRDYLCQLQNLGYLSLGANQISGPLPACLGNITSLRYLYLYSNRL	2.3e-06	MAKLAETYACIPSTERGRGILISGDAKSNVILYCNGRSVIIRYLDRPLDVSVYADHAYQTTVARFSPNGEWIASADVSGTVRIWGTHNDHVLKVEFRVLTGRIDDLQWSPDGMRIVASGDGKGKSFVRAFMWDSGTNVGEFDGHSRRVLSCAFKPTRPFRIVTCGEDFLVNFYEGPPFKFKLSHRDHTNFVNCVRFSPDGSKFITVSSDKKGLVYDAKTAEKIGELSSEDGHKGSIYAVSWSPDSKQVLTVSADKSAKIWVISEDGHGEVTKTMTCPSSGGVEDMLVGCLWQNDYLVTVSLGGTISIFSASDPDKAPVTMSGHMKNINSLAVLKSSPKVILSTSYDGLIVKWIQGIGFNGRLERKVTGQIKCFAAVDEEIVSSGFDNKVWRVSLLGDQC…	1035	11724	https://onlinelibrary.wiley.com/doi/full/10.1111/pbi.13558
PlantKGA_431	Apiales	Araliaceae	Panax	notoginseng	Panax notoginseng		三七	chromosome	Yes	转录本	Pno02G004023t1	Pno02G004023t11288xxPlantKGA_431	Pno02G004023	L	partial	2	196232411	196233301	-	Pfam	PF13855	Leucine rich repeat	Leucine-rich repeat	145	204	SLEELGLYANNLTGSIPSTIGSLGNLTILSLYQNLLVGSIPKGIGKLRSLTQLDLSENHL	6.8e-09	MNHRPFFQVFFLVAILLISSSKQIQLEDEATALLTWKASLHHNRSQSLSSWVGSSSPCNNWTGIGCDEAGTHVSHINLTSYGLKGTLHHLNFSSFPQLISLDLLNNSLYGNIPYQIGLLTNLRFRDMSTNQLNGSIPREIGMLISLEELGLYANNLTGSIPSTIGSLGNLTILSLYQNLLVGSIPKGIGKLRSLTQLDLSENHLTGTIPREIGLLKKLRICHMFSNQLSGSIPREIGMLSSIEELYLNTNNLTGSIPSTIGSLGNLTILYLYQNLLVGSIPKKIGKLKSLTSLTCR	296	891	https://onlinelibrary.wiley.com/doi/full/10.1111/pbi.13558
PlantKGA_431	Apiales	Araliaceae	Panax	notoginseng	Panax notoginseng		三七	chromosome	Yes	转录本	Pno02G004023t1	Pno02G004023t11288xxPlantKGA_431	Pno02G004023	L	partial	2	196232411	196233301	-	Pfam	PF08263	Leucine rich repeat N-terminal domain	Leucine-rich repeat-containing N-terminal, plant-type	27	67	EDEATALLTWKASLHHNRSQSLSSWVGSSSPCNNWTGIGCD	7e-10	MNHRPFFQVFFLVAILLISSSKQIQLEDEATALLTWKASLHHNRSQSLSSWVGSSSPCNNWTGIGCDEAGTHVSHINLTSYGLKGTLHHLNFSSFPQLISLDLLNNSLYGNIPYQIGLLTNLRFRDMSTNQLNGSIPREIGMLISLEELGLYANNLTGSIPSTIGSLGNLTILSLYQNLLVGSIPKGIGKLRSLTQLDLSENHLTGTIPREIGLLKKLRICHMFSNQLSGSIPREIGMLSSIEELYLNTNNLTGSIPSTIGSLGNLTILYLYQNLLVGSIPKKIGKLKSLTSLTCR	296	891	https://onlinelibrary.wiley.com/doi/full/10.1111/pbi.13558
PlantKGA_431	Apiales	Araliaceae	Panax	notoginseng	Panax notoginseng		三七	chromosome	Yes	转录本	Pno02G004260t1	Pno02G004260t11288xxPlantKGA_431	Pno02G004260	L	partial	2	199775632	199776791	+	Pfam	PF13855	Leucine rich repeat	Leucine-rich repeat	270	329	KIQGLYLSTNQLSGPIPSSLHECSELQLLSLSKNKFDGIIPREIGNLTLLEDLYLADNHL	2.9e-07	MPCLQFLEVMRTIICFSFYMIIVLLLEYHHHTTIFTSCSASNTHHHHHVSLNITTDQSALLTFKSHIISDPNRILTTNWSITTQASCCSWVGVTCSTRHGRVMALNLSNMGLIGTIPPEIGNLSFLVSFDLTNNSFNGSLPKDLSNLRRLKEILFRNNSFGGELPSWLSKLSNLKYLSLSFNSFTGTIPPSLSNLSKLEWLSLGRNPLQGNIPGDFGSFKNLQVLEFRSNQLSGSIRLTVFNILTLRILALTNNSLSGNVPTDICHRIPKIQGLYLSTNQLSGPIPSSLHECSELQLLSLSKNKFDGIIPREIGNLTLLEDLYLADNHLKVSPSFKQHTNSFHIKP	346	1160	https://onlinelibrary.wiley.com/doi/full/10.1111/pbi.13558
PlantKGA_431	Apiales	Araliaceae	Panax	notoginseng	Panax notoginseng		三七	chromosome	Yes	转录本	Pno02G004260t1	Pno02G004260t11288xxPlantKGA_431	Pno02G004260	L	partial	2	199775632	199776791	+	Pfam	PF13855	Leucine rich repeat	Leucine-rich repeat	165	208	PSWLSKLSNLKYLSLSFNSFTGTIPPSLSNLSKLEWLSLGRNPL	7.2e-07	MPCLQFLEVMRTIICFSFYMIIVLLLEYHHHTTIFTSCSASNTHHHHHVSLNITTDQSALLTFKSHIISDPNRILTTNWSITTQASCCSWVGVTCSTRHGRVMALNLSNMGLIGTIPPEIGNLSFLVSFDLTNNSFNGSLPKDLSNLRRLKEILFRNNSFGGELPSWLSKLSNLKYLSLSFNSFTGTIPPSLSNLSKLEWLSLGRNPLQGNIPGDFGSFKNLQVLEFRSNQLSGSIRLTVFNILTLRILALTNNSLSGNVPTDICHRIPKIQGLYLSTNQLSGPIPSSLHECSELQLLSLSKNKFDGIIPREIGNLTLLEDLYLADNHLKVSPSFKQHTNSFHIKP	346	1160	https://onlinelibrary.wiley.com/doi/full/10.1111/pbi.13558
PlantKGA_431	Apiales	Araliaceae	Panax	notoginseng	Panax notoginseng		三七	chromosome	Yes	转录本	Pno02G004260t1	Pno02G004260t11288xxPlantKGA_431	Pno02G004260	L	partial	2	199775632	199776791	+	Pfam	PF08263	Leucine rich repeat N-terminal domain	Leucine-rich repeat-containing N-terminal, plant-type	55	96	TDQSALLTFKSHIISDPNRILTTNWSITTQASCCSWVGVTCS	1.6e-10	MPCLQFLEVMRTIICFSFYMIIVLLLEYHHHTTIFTSCSASNTHHHHHVSLNITTDQSALLTFKSHIISDPNRILTTNWSITTQASCCSWVGVTCSTRHGRVMALNLSNMGLIGTIPPEIGNLSFLVSFDLTNNSFNGSLPKDLSNLRRLKEILFRNNSFGGELPSWLSKLSNLKYLSLSFNSFTGTIPPSLSNLSKLEWLSLGRNPLQGNIPGDFGSFKNLQVLEFRSNQLSGSIRLTVFNILTLRILALTNNSLSGNVPTDICHRIPKIQGLYLSTNQLSGPIPSSLHECSELQLLSLSKNKFDGIIPREIGNLTLLEDLYLADNHLKVSPSFKQHTNSFHIKP	346	1160	https://onlinelibrary.wiley.com/doi/full/10.1111/pbi.13558
PlantKGA_431	Apiales	Araliaceae	Panax	notoginseng	Panax notoginseng		三七	chromosome	Yes	转录本	Pno02G004327t1	Pno02G004327t11288xxPlantKGA_431	Pno02G004327	L	partial	2	20110439	20113087	+	Pfam	PF08263	Leucine rich repeat N-terminal domain	Leucine-rich repeat-containing N-terminal, plant-type	27	65	NQDGITLLDLKSTLNDSKDFLSDWKDTDESPCHWTGISC	7.1e-12	MKMVILIWVFSAILEATLLSICSAALNQDGITLLDLKSTLNDSKDFLSDWKDTDESPCHWTGISCYPDDQRVRSINLPYMQLGGFISPIIVAMATQDSDNSTPILAVPISTTPPSHNLTESVSNPNPSEFFESEEQYPHANTPFIITEIEQRAIRSRYQIPDTHLVRAPESSERMYQRLDGWTAVPVTVLEKGVRFPLHSFLVTLLGFIGVGFAQLVPNSYIHILAFIALCYELGIPPAVDSFFTLFSAGKSRERGFKVLSKQSPKPNAKFEKRPLMDTPSSNKGWHREWFFVKGPEIPSIPEWTTSERISADFGDIPEERV	322	2649	https://onlinelibrary.wiley.com/doi/full/10.1111/pbi.13558
PlantKGA_431	Apiales	Araliaceae	Panax	notoginseng	Panax notoginseng		三七	chromosome	Yes	转录本	Pno02G004525t1	Pno02G004525t11288xxPlantKGA_431	Pno02G004525	L	partial	2	204933423	204946815	+	Pfam	PF08263	Leucine rich repeat N-terminal domain	Leucine-rich repeat-containing N-terminal, plant-type	207	247	TDYSALHSFKSHITNDPFNVLANWSTTTKSTSICSWIGVTC	1.1e-10	MKIYLKRDSWQWWVIKNGPVIPRHDDGRLRTLMDMDANESYMFSYNSRAMNTLLSGMDQAKIDKVSSCNTTTEMSDSFLTSHEVILFDEIEKAHSDVFNVFLQILNDGNQTFIQSDWGGCPISRRSVTGYCLMLGHSLISWQSRKKSVTSRSSAEAEYRALDFKISFISKSMNSKSPRSDMLPFAMLLFLAFPFVTCSAQIATNLTTDYSALHSFKSHITNDPFNVLANWSTTTKSTSICSWIGVTCGADHQRVTALNLSNTGLTGTISPHLGNLTFLASLDLSYNDLHGFLPTELAHLRRLQEINLGYNNFSRQIPSCFNLQHFKGRNNHLGGNLLTGNIPKEIGNLSKLQILDMNSNQLIGSIPWVIFNMSSLRTIDVKFNGLFDSLPVDMCDHHSK…	466	13393	https://onlinelibrary.wiley.com/doi/full/10.1111/pbi.13558
PlantKGA_431	Apiales	Araliaceae	Panax	notoginseng	Panax notoginseng		三七	chromosome	Yes	转录本	Pno02G004525t1	Pno02G004525t11288xxPlantKGA_431	Pno02G004525	L	partial	2	204933423	204946815	+	Pfam	PF13855	Leucine rich repeat	Leucine-rich repeat	253	312	RVTALNLSNTGLTGTISPHLGNLTFLASLDLSYNDLHGFLPTELAHLRRLQEINLGYNNF	9.6e-07	MKIYLKRDSWQWWVIKNGPVIPRHDDGRLRTLMDMDANESYMFSYNSRAMNTLLSGMDQAKIDKVSSCNTTTEMSDSFLTSHEVILFDEIEKAHSDVFNVFLQILNDGNQTFIQSDWGGCPISRRSVTGYCLMLGHSLISWQSRKKSVTSRSSAEAEYRALDFKISFISKSMNSKSPRSDMLPFAMLLFLAFPFVTCSAQIATNLTTDYSALHSFKSHITNDPFNVLANWSTTTKSTSICSWIGVTCGADHQRVTALNLSNTGLTGTISPHLGNLTFLASLDLSYNDLHGFLPTELAHLRRLQEINLGYNNFSRQIPSCFNLQHFKGRNNHLGGNLLTGNIPKEIGNLSKLQILDMNSNQLIGSIPWVIFNMSSLRTIDVKFNGLFDSLPVDMCDHHSK…	466	13393	https://onlinelibrary.wiley.com/doi/full/10.1111/pbi.13558
PlantKGA_431	Apiales	Araliaceae	Panax	notoginseng	Panax notoginseng		三七	chromosome	Yes	转录本	Pno02G004669t1	Pno02G004669t11288xxPlantKGA_431	Pno02G004669	L	partial	2	208368117	208370394	-	Pfam	PF13855	Leucine rich repeat	Leucine-rich repeat	339	377	NLKNLENMDLSQNLLTGVLPRQIGELGKLENLNLSHNEI	2.4e-06	MNHHPFLQVFFIVAILLISSSKQIQLEDEAAALLTWKASLHHNRSQSLSSWVGSSNPCNDWTGIGCNKAGTHVSHINLTSYGLKGLLTNLRICGMYENQLSGSIPQEIGMLISLEELSLYTNNLTGSIPSTIGSLGNLTILYLYQNLLVDSIPKEIGKLRNWNASSLEELGLYNNNLTGSIPSTIGSLCNLTILVLYPNLLVGSIPKEIGKLRSLTKLDLSENHLIGTIPHEIGLLTNLRICHMFSNQLGGSIPQEIGMLSSLEELSLDNNTLDQYLQTNLSGYIPPEIGLLPNLWNLNFAKNNLSGPIPKQLGDCMNLQSLNLSMNSFQKGIPYELGNLKNLENMDLSQNLLTGVLPRQIGELGKLENLNLSHNEISGSIESIFHGMLSLTSIDISYN…	504	2278	https://onlinelibrary.wiley.com/doi/full/10.1111/pbi.13558
PlantKGA_431	Apiales	Araliaceae	Panax	notoginseng	Panax notoginseng		三七	chromosome	Yes	转录本	Pno02G004669t1	Pno02G004669t11288xxPlantKGA_431	Pno02G004669	L	partial	2	208368117	208370394	-	Pfam	PF13855	Leucine rich repeat	Leucine-rich repeat	166	225	SLEELGLYNNNLTGSIPSTIGSLCNLTILVLYPNLLVGSIPKEIGKLRSLTKLDLSENHL	3.3e-07	MNHHPFLQVFFIVAILLISSSKQIQLEDEAAALLTWKASLHHNRSQSLSSWVGSSNPCNDWTGIGCNKAGTHVSHINLTSYGLKGLLTNLRICGMYENQLSGSIPQEIGMLISLEELSLYTNNLTGSIPSTIGSLGNLTILYLYQNLLVDSIPKEIGKLRNWNASSLEELGLYNNNLTGSIPSTIGSLCNLTILVLYPNLLVGSIPKEIGKLRSLTKLDLSENHLIGTIPHEIGLLTNLRICHMFSNQLGGSIPQEIGMLSSLEELSLDNNTLDQYLQTNLSGYIPPEIGLLPNLWNLNFAKNNLSGPIPKQLGDCMNLQSLNLSMNSFQKGIPYELGNLKNLENMDLSQNLLTGVLPRQIGELGKLENLNLSHNEISGSIESIFHGMLSLTSIDISYN…	504	2278	https://onlinelibrary.wiley.com/doi/full/10.1111/pbi.13558
PlantKGA_431	Apiales	Araliaceae	Panax	notoginseng	Panax notoginseng		三七	chromosome	Yes	转录本	Pno02G004669t1	Pno02G004669t11288xxPlantKGA_431	Pno02G004669	L	partial	2	208368117	208370394	-	Pfam	PF08263	Leucine rich repeat N-terminal domain	Leucine-rich repeat-containing N-terminal, plant-type	27	67	EDEAAALLTWKASLHHNRSQSLSSWVGSSNPCNDWTGIGCN	3.5e-09	MNHHPFLQVFFIVAILLISSSKQIQLEDEAAALLTWKASLHHNRSQSLSSWVGSSNPCNDWTGIGCNKAGTHVSHINLTSYGLKGLLTNLRICGMYENQLSGSIPQEIGMLISLEELSLYTNNLTGSIPSTIGSLGNLTILYLYQNLLVDSIPKEIGKLRNWNASSLEELGLYNNNLTGSIPSTIGSLCNLTILVLYPNLLVGSIPKEIGKLRSLTKLDLSENHLIGTIPHEIGLLTNLRICHMFSNQLGGSIPQEIGMLSSLEELSLDNNTLDQYLQTNLSGYIPPEIGLLPNLWNLNFAKNNLSGPIPKQLGDCMNLQSLNLSMNSFQKGIPYELGNLKNLENMDLSQNLLTGVLPRQIGELGKLENLNLSHNEISGSIESIFHGMLSLTSIDISYN…	504	2278	https://onlinelibrary.wiley.com/doi/full/10.1111/pbi.13558
PlantKGA_431	Apiales	Araliaceae	Panax	notoginseng	Panax notoginseng		三七	chromosome	Yes	转录本	Pno02G004718t1	Pno02G004718t11288xxPlantKGA_431	Pno02G004718	L	partial	2	209422862	209423419	-	Pfam	PF08263	Leucine rich repeat N-terminal domain	Leucine-rich repeat-containing N-terminal, plant-type	27	67	EDEAAALLTWKASLHHNRSQSLSSWVGSSSPCNDWTGIGCN	1e-09	MNHHPFLQVFFIVAILLISSSKQIQLEDEAAALLTWKASLHHNRSQSLSSWVGSSSPCNDWTGIGCNEAGTHVSHINLTSYGLKGTLHHLNFSSFQQLISLDLSDNLLYGNIPHEIGLLTNLRMCGMSTNQLSGSIPREIGMLSSLEGLGLYTNNLTGSIPCRSTRQNLRSYPGLRPTWWIMKKE	185	558	https://onlinelibrary.wiley.com/doi/full/10.1111/pbi.13558
PlantKGA_431	Apiales	Araliaceae	Panax	notoginseng	Panax notoginseng		三七	chromosome	Yes	转录本	Pno02G007011t1	Pno02G007011t11288xxPlantKGA_431	Pno02G007011	L	partial	2	35944996	35949672	-	Pfam	PF13855	Leucine rich repeat	Leucine-rich repeat	446	505	TLVKINISNNFADLQYLPRSIGNLEMLEELDMSNNQIRILPDSFRMLSKLRVLNVEGNPL	1.1e-07	MESSSPKSVDEVVEEIMRIHRSLPTRPGIEEIEAAKILIRNVENEEQSKLDAIARQTKSLEVPEELFMILQEMQKNLVLFRSNEQKRDAVKLLDLENAHSVFDDSIQRASRCLPSAMGSNSLSGTSTSSGRLSLTNSAASFSFNSPVTTTSSLSLFYEKEGVKASTELITRDDSYVKKAKSTFYGDGIGVGLRSGDVATPQIVDSTLKPVISSGQDGEKLSLIKLASLIEVSSKKGTRDLNLRGKLMDQIEWLPDSVGKLSSLITLDLSENRIVALPTTIGGLSSLTKLDLHSNKISELPETIGDILNLVFLDLRGNQLASLPATFGRLVRLQELDLSSNLLQVLPESIGSLVSLQILNIETNNIEEIPHTIAHCSSLKELRADYNRLKALPEAVGRIA…	566	4677	https://onlinelibrary.wiley.com/doi/full/10.1111/pbi.13558
PlantKGA_431	Apiales	Araliaceae	Panax	notoginseng	Panax notoginseng		三七	chromosome	Yes	转录本	Pno02G007011t1	Pno02G007011t11288xxPlantKGA_431	Pno02G007011	L	partial	2	35944996	35949672	-	Pfam	PF13855	Leucine rich repeat	Leucine-rich repeat	331	388	RLQELDLSSNLLQVLPESIGSLVSLQILNIETNNIEEIPHTIAHCSSLKELRADYNRL	9.9e-10	MESSSPKSVDEVVEEIMRIHRSLPTRPGIEEIEAAKILIRNVENEEQSKLDAIARQTKSLEVPEELFMILQEMQKNLVLFRSNEQKRDAVKLLDLENAHSVFDDSIQRASRCLPSAMGSNSLSGTSTSSGRLSLTNSAASFSFNSPVTTTSSLSLFYEKEGVKASTELITRDDSYVKKAKSTFYGDGIGVGLRSGDVATPQIVDSTLKPVISSGQDGEKLSLIKLASLIEVSSKKGTRDLNLRGKLMDQIEWLPDSVGKLSSLITLDLSENRIVALPTTIGGLSSLTKLDLHSNKISELPETIGDILNLVFLDLRGNQLASLPATFGRLVRLQELDLSSNLLQVLPESIGSLVSLQILNIETNNIEEIPHTIAHCSSLKELRADYNRLKALPEAVGRIA…	566	4677	https://onlinelibrary.wiley.com/doi/full/10.1111/pbi.13558
PlantKGA_431	Apiales	Araliaceae	Panax	notoginseng	Panax notoginseng		三七	chromosome	Yes	转录本	Pno02G007011t1	Pno02G007011t11288xxPlantKGA_431	Pno02G007011	L	partial	2	35944996	35949672	-	Pfam	PF13855	Leucine rich repeat	Leucine-rich repeat	262	319	SLITLDLSENRIVALPTTIGGLSSLTKLDLHSNKISELPETIGDILNLVFLDLRGNQL	4.4e-09	MESSSPKSVDEVVEEIMRIHRSLPTRPGIEEIEAAKILIRNVENEEQSKLDAIARQTKSLEVPEELFMILQEMQKNLVLFRSNEQKRDAVKLLDLENAHSVFDDSIQRASRCLPSAMGSNSLSGTSTSSGRLSLTNSAASFSFNSPVTTTSSLSLFYEKEGVKASTELITRDDSYVKKAKSTFYGDGIGVGLRSGDVATPQIVDSTLKPVISSGQDGEKLSLIKLASLIEVSSKKGTRDLNLRGKLMDQIEWLPDSVGKLSSLITLDLSENRIVALPTTIGGLSSLTKLDLHSNKISELPETIGDILNLVFLDLRGNQLASLPATFGRLVRLQELDLSSNLLQVLPESIGSLVSLQILNIETNNIEEIPHTIAHCSSLKELRADYNRLKALPEAVGRIA…	566	4677	https://onlinelibrary.wiley.com/doi/full/10.1111/pbi.13558
PlantKGA_431	Apiales	Araliaceae	Panax	notoginseng	Panax notoginseng		三七	chromosome	Yes	转录本	Pno02G007011t1	Pno02G007011t11288xxPlantKGA_431	Pno02G007011	L	partial	2	35944996	35949672	-	Pfam	PF00560	Leucine Rich Repeat	Leucine-rich repeat	423	440	NLRELDLSFNELESVPES	1.7	MESSSPKSVDEVVEEIMRIHRSLPTRPGIEEIEAAKILIRNVENEEQSKLDAIARQTKSLEVPEELFMILQEMQKNLVLFRSNEQKRDAVKLLDLENAHSVFDDSIQRASRCLPSAMGSNSLSGTSTSSGRLSLTNSAASFSFNSPVTTTSSLSLFYEKEGVKASTELITRDDSYVKKAKSTFYGDGIGVGLRSGDVATPQIVDSTLKPVISSGQDGEKLSLIKLASLIEVSSKKGTRDLNLRGKLMDQIEWLPDSVGKLSSLITLDLSENRIVALPTTIGGLSSLTKLDLHSNKISELPETIGDILNLVFLDLRGNQLASLPATFGRLVRLQELDLSSNLLQVLPESIGSLVSLQILNIETNNIEEIPHTIAHCSSLKELRADYNRLKALPEAVGRIA…	566	4677	https://onlinelibrary.wiley.com/doi/full/10.1111/pbi.13558
PlantKGA_431	Apiales	Araliaceae	Panax	notoginseng	Panax notoginseng		三七	chromosome	Yes	转录本	Pno02G008626t1	Pno02G008626t11288xxPlantKGA_431	Pno02G008626	L	partial	2	49082030	49082740	-	Pfam	PF08263	Leucine rich repeat N-terminal domain	Leucine-rich repeat-containing N-terminal, plant-type	32	72	SDEGATLLEIKKSFRDVDNVLYDWTDSPSSDYCVWRGVTCD	9.4e-12	MFVLKSIYSQSLLVPVLFVLFITCLSFGSVVSDEGATLLEIKKSFRDVDNVLYDWTDSPSSDYCVWRGVTCDNVTFNVIALKTDSTTCLTILGIKFSCYVYGRQGTKL	108	711	https://onlinelibrary.wiley.com/doi/full/10.1111/pbi.13558
PlantKGA_431	Apiales	Araliaceae	Panax	notoginseng	Panax notoginseng		三七	chromosome	Yes	转录本	Pno02G009528t1	Pno02G009528t11288xxPlantKGA_431	Pno02G009528	L	partial	2	55681819	55684931	+	Pfam	PF13855	Leucine rich repeat	Leucine-rich repeat	151	209	LNQFNVHGNRLNGSIPLSFRNLESLMYLNLSSNEFKGGIPVELGRIINLDTLDLSNNDF	1.8e-06	MCQLTRLWYFDVRRNNLTGPIPNSIGNCTRFEILSLQGNKLTGKIPEVIGLMQALAVLDLSENELIGSIPLILCNLSYTGKLYLHGNKLTGPIPPELGNMSKPSYLQLNDNQLVGGIPAELGKLEQLFELNLANNNLEGPIPQNISSCTALNQFNVHGNRLNGSIPLSFRNLESLMYLNLSSNEFKGGIPVELGRIINLDTLDLSNNDFSGHVPTSIGDLEHLLTLNLSCNHLNGPVPVEFGNLRSILIIDMSLNKISGGIPKELGQLQNIVSLNISYNNFSEVIPPSRNLPCCAQSETLPSDPQCMKLQGF	312	3113	https://onlinelibrary.wiley.com/doi/full/10.1111/pbi.13558
PlantKGA_431	Apiales	Araliaceae	Panax	notoginseng	Panax notoginseng		三七	chromosome	Yes	转录本	Pno02G009528t1	Pno02G009528t11288xxPlantKGA_431	Pno02G009528	L	partial	2	55681819	55684931	+	Pfam	PF13516	Leucine Rich repeat	Leucine-rich repeat	222	235	HLLTLNLSCNHLNG	0.85	MCQLTRLWYFDVRRNNLTGPIPNSIGNCTRFEILSLQGNKLTGKIPEVIGLMQALAVLDLSENELIGSIPLILCNLSYTGKLYLHGNKLTGPIPPELGNMSKPSYLQLNDNQLVGGIPAELGKLEQLFELNLANNNLEGPIPQNISSCTALNQFNVHGNRLNGSIPLSFRNLESLMYLNLSSNEFKGGIPVELGRIINLDTLDLSNNDFSGHVPTSIGDLEHLLTLNLSCNHLNGPVPVEFGNLRSILIIDMSLNKISGGIPKELGQLQNIVSLNISYNNFSEVIPPSRNLPCCAQSETLPSDPQCMKLQGF	312	3113	https://onlinelibrary.wiley.com/doi/full/10.1111/pbi.13558
PlantKGA_431	Apiales	Araliaceae	Panax	notoginseng	Panax notoginseng		三七	chromosome	Yes	转录本	Pno02G013641t1	Pno02G013641t11288xxPlantKGA_431	Pno02G013641	L	partial	2	81002198	81004814	+	Pfam	PF08263	Leucine rich repeat N-terminal domain	Leucine-rich repeat-containing N-terminal, plant-type	128	164	VQALMSIRAGLKDPQGVLAKWDFDAADPCSWTMVTCS	6.1e-11	MAGAVPSTLHQQVKYIINDNLVIINVEPEYHVHVQSDMPLISFNEGVEPVSFQALEPGQGLGKSQQGIRSPIQIPSQIGKAGLGHSSRSNHRNPHKHTPVPSSTILLPNPTDTDSVRPLRKIPIFVAVQALMSIRAGLKDPQGVLAKWDFDAADPCSWTMVTCSLDNLVIGLGTPSQNLSGFLSPSIGQFKVMDYVAFLRLELNDHGMMLGRFGRWSGVFLPSLMFESAKRLLDDVACGSP	241	2617	https://onlinelibrary.wiley.com/doi/full/10.1111/pbi.13558
PlantKGA_431	Apiales	Araliaceae	Panax	notoginseng	Panax notoginseng		三七	chromosome	Yes	转录本	Pno02G014126t1	Pno02G014126t11288xxPlantKGA_431	Pno02G014126	L	partial	2	8411549	8423112	+	Pfam	PF13516	Leucine Rich repeat	Leucine-rich repeat	374	395	QHLKCLELSDTEVGSNGLRHLA	0.16	MGGACSRKRGQQVNEDTGHRGVSVRYCKSGSSKWLGTSISRAAIDIKQGKGKCPSLMELCTYKICEDISQYSTFSMLPRDISQQIFNELVCSQHLTDVTLEAFRDCALQDLDLGAYPGFNDDLMDVVSSQEGSLLSLDLSCSDVTDSGLINLKDCKNLQILNLNYCDQISDHGLEYISGLSNLTTLSCRRNSCITAKGMSAFSGLVNLLELDLERCPGIHGGLVHLKGLSKLESLNINCCNCITDADMKPLAGLASLKELQISSSKVTDHGVTFLKALNKLTLLNMEGCPVTAACLDSLSALISLLYVNLSRCKLTDGCENFSRLETLKVLNLGFNEISDAVLVHLKGLTNLENLNLDSCRIGDEELVHLTGFQHLKCLELSDTEVGSNGLRHLAGLIN…	582	11564	https://onlinelibrary.wiley.com/doi/full/10.1111/pbi.13558
PlantKGA_431	Apiales	Araliaceae	Panax	notoginseng	Panax notoginseng		三七	chromosome	Yes	转录本	Pno02G014126t1	Pno02G014126t11288xxPlantKGA_431	Pno02G014126	L	partial	2	8411549	8423112	+	Pfam	PF13516	Leucine Rich repeat	Leucine-rich repeat	155	178	CKNLQILNLNYCDQISDHGLEYIS	0.04	MGGACSRKRGQQVNEDTGHRGVSVRYCKSGSSKWLGTSISRAAIDIKQGKGKCPSLMELCTYKICEDISQYSTFSMLPRDISQQIFNELVCSQHLTDVTLEAFRDCALQDLDLGAYPGFNDDLMDVVSSQEGSLLSLDLSCSDVTDSGLINLKDCKNLQILNLNYCDQISDHGLEYISGLSNLTTLSCRRNSCITAKGMSAFSGLVNLLELDLERCPGIHGGLVHLKGLSKLESLNINCCNCITDADMKPLAGLASLKELQISSSKVTDHGVTFLKALNKLTLLNMEGCPVTAACLDSLSALISLLYVNLSRCKLTDGCENFSRLETLKVLNLGFNEISDAVLVHLKGLTNLENLNLDSCRIGDEELVHLTGFQHLKCLELSDTEVGSNGLRHLAGLIN…	582	11564	https://onlinelibrary.wiley.com/doi/full/10.1111/pbi.13558
PlantKGA_431	Apiales	Araliaceae	Panax	notoginseng	Panax notoginseng		三七	chromosome	Yes	转录本	Pno02G014126t1	Pno02G014126t11288xxPlantKGA_431	Pno02G014126	L	partial	2	8411549	8423112	+	Pfam	PF13516	Leucine Rich repeat	Leucine-rich repeat	327	340	TLKVLNLGFNEISD	0.59	MGGACSRKRGQQVNEDTGHRGVSVRYCKSGSSKWLGTSISRAAIDIKQGKGKCPSLMELCTYKICEDISQYSTFSMLPRDISQQIFNELVCSQHLTDVTLEAFRDCALQDLDLGAYPGFNDDLMDVVSSQEGSLLSLDLSCSDVTDSGLINLKDCKNLQILNLNYCDQISDHGLEYISGLSNLTTLSCRRNSCITAKGMSAFSGLVNLLELDLERCPGIHGGLVHLKGLSKLESLNINCCNCITDADMKPLAGLASLKELQISSSKVTDHGVTFLKALNKLTLLNMEGCPVTAACLDSLSALISLLYVNLSRCKLTDGCENFSRLETLKVLNLGFNEISDAVLVHLKGLTNLENLNLDSCRIGDEELVHLTGFQHLKCLELSDTEVGSNGLRHLAGLIN…	582	11564	https://onlinelibrary.wiley.com/doi/full/10.1111/pbi.13558
PlantKGA_431	Apiales	Araliaceae	Panax	notoginseng	Panax notoginseng		三七	chromosome	Yes	转录本	Pno02G014126t1	Pno02G014126t11288xxPlantKGA_431	Pno02G014126	L	partial	2	8411549	8423112	+	Pfam	PF13516	Leucine Rich repeat	Leucine-rich repeat	230	252	SKLESLNINCCNCITDADMKPLA	0.026	MGGACSRKRGQQVNEDTGHRGVSVRYCKSGSSKWLGTSISRAAIDIKQGKGKCPSLMELCTYKICEDISQYSTFSMLPRDISQQIFNELVCSQHLTDVTLEAFRDCALQDLDLGAYPGFNDDLMDVVSSQEGSLLSLDLSCSDVTDSGLINLKDCKNLQILNLNYCDQISDHGLEYISGLSNLTTLSCRRNSCITAKGMSAFSGLVNLLELDLERCPGIHGGLVHLKGLSKLESLNINCCNCITDADMKPLAGLASLKELQISSSKVTDHGVTFLKALNKLTLLNMEGCPVTAACLDSLSALISLLYVNLSRCKLTDGCENFSRLETLKVLNLGFNEISDAVLVHLKGLTNLENLNLDSCRIGDEELVHLTGFQHLKCLELSDTEVGSNGLRHLAGLIN…	582	11564	https://onlinelibrary.wiley.com/doi/full/10.1111/pbi.13558
PlantKGA_431	Apiales	Araliaceae	Panax	notoginseng	Panax notoginseng		三七	chromosome	Yes	转录本	Pno02G014126t1	Pno02G014126t11288xxPlantKGA_431	Pno02G014126	L	partial	2	8411549	8423112	+	Pfam	PF13516	Leucine Rich repeat	Leucine-rich repeat	133	152	SLLSLDLSCSDVTDSGLINL	0.21	MGGACSRKRGQQVNEDTGHRGVSVRYCKSGSSKWLGTSISRAAIDIKQGKGKCPSLMELCTYKICEDISQYSTFSMLPRDISQQIFNELVCSQHLTDVTLEAFRDCALQDLDLGAYPGFNDDLMDVVSSQEGSLLSLDLSCSDVTDSGLINLKDCKNLQILNLNYCDQISDHGLEYISGLSNLTTLSCRRNSCITAKGMSAFSGLVNLLELDLERCPGIHGGLVHLKGLSKLESLNINCCNCITDADMKPLAGLASLKELQISSSKVTDHGVTFLKALNKLTLLNMEGCPVTAACLDSLSALISLLYVNLSRCKLTDGCENFSRLETLKVLNLGFNEISDAVLVHLKGLTNLENLNLDSCRIGDEELVHLTGFQHLKCLELSDTEVGSNGLRHLAGLIN…	582	11564	https://onlinelibrary.wiley.com/doi/full/10.1111/pbi.13558
PlantKGA_431	Apiales	Araliaceae	Panax	notoginseng	Panax notoginseng		三七	chromosome	Yes	转录本	Pno02G014126t1	Pno02G014126t11288xxPlantKGA_431	Pno02G014126	L	partial	2	8411549	8423112	+	Pfam	PF13516	Leucine Rich repeat	Leucine-rich repeat	399	419	NLESLNLSFTIVTDGGLRKLS	1.9	MGGACSRKRGQQVNEDTGHRGVSVRYCKSGSSKWLGTSISRAAIDIKQGKGKCPSLMELCTYKICEDISQYSTFSMLPRDISQQIFNELVCSQHLTDVTLEAFRDCALQDLDLGAYPGFNDDLMDVVSSQEGSLLSLDLSCSDVTDSGLINLKDCKNLQILNLNYCDQISDHGLEYISGLSNLTTLSCRRNSCITAKGMSAFSGLVNLLELDLERCPGIHGGLVHLKGLSKLESLNINCCNCITDADMKPLAGLASLKELQISSSKVTDHGVTFLKALNKLTLLNMEGCPVTAACLDSLSALISLLYVNLSRCKLTDGCENFSRLETLKVLNLGFNEISDAVLVHLKGLTNLENLNLDSCRIGDEELVHLTGFQHLKCLELSDTEVGSNGLRHLAGLIN…	582	11564	https://onlinelibrary.wiley.com/doi/full/10.1111/pbi.13558
PlantKGA_431	Apiales	Araliaceae	Panax	notoginseng	Panax notoginseng		三七	chromosome	Yes	转录本	Pno02G014126t1	Pno02G014126t11288xxPlantKGA_431	Pno02G014126	L	partial	2	8411549	8423112	+	Pfam	PF13855	Leucine rich repeat	Leucine-rich repeat	476	534	NLRSLEICGGGLTDAGVKNIKDLSSLTLLNLSQNNHLTDRALELISGLTQLVSLNVSNS	7.3e-07	MGGACSRKRGQQVNEDTGHRGVSVRYCKSGSSKWLGTSISRAAIDIKQGKGKCPSLMELCTYKICEDISQYSTFSMLPRDISQQIFNELVCSQHLTDVTLEAFRDCALQDLDLGAYPGFNDDLMDVVSSQEGSLLSLDLSCSDVTDSGLINLKDCKNLQILNLNYCDQISDHGLEYISGLSNLTTLSCRRNSCITAKGMSAFSGLVNLLELDLERCPGIHGGLVHLKGLSKLESLNINCCNCITDADMKPLAGLASLKELQISSSKVTDHGVTFLKALNKLTLLNMEGCPVTAACLDSLSALISLLYVNLSRCKLTDGCENFSRLETLKVLNLGFNEISDAVLVHLKGLTNLENLNLDSCRIGDEELVHLTGFQHLKCLELSDTEVGSNGLRHLAGLIN…	582	11564	https://onlinelibrary.wiley.com/doi/full/10.1111/pbi.13558
PlantKGA_431	Apiales	Araliaceae	Panax	notoginseng	Panax notoginseng		三七	chromosome	Yes	转录本	Pno02G014189t2	Pno02G014189t21288xxPlantKGA_431	Pno02G014189	L	partial	2	84521637	84565185	+	Pfam	PF12799	Leucine Rich repeats (2 copies)	Leucine rich repeat 4	194	228	ETLDLSRNKFTKVDNLRKCTKLKHLDLGFNQLRTI	6.3e-07	MSIVTGDRYLESLVKFVENVAGPLIEGTLVLKLNPVGLHYVQSRLEALAELESLLAGAPVDYLRAYVSDLGDHRALEQLRRILRLLTSLKVVSVLPPPVRDPTPLSLLPFGRLRVLELRGCDLSTSAARGLLELRHTLEKLICHNSTDALRHVFASRIAEIKDSPNWNRLNFVSCACNGLFLMDESLQLLPVVETLDLSRNKFTKVDNLRKCTKLKHLDLGFNQLRTIVSLNEVYRQIVKLVLRNNALTTLRGIENLQSLEGLDLSYNILSNFSQLEILSGLLSLKSLWLEGNPLCSARWYRPQVFSFFPHPDELELDDKKICTRELWKRQIIIASRQKRPASFGFYFTAKDDAGLEGTINTKQKKLSRLADIESEGQSTCVGSDQESVSCDNQIQGKE…	1127	43549	https://onlinelibrary.wiley.com/doi/full/10.1111/pbi.13558
PlantKGA_431	Apiales	Araliaceae	Panax	notoginseng	Panax notoginseng		三七	chromosome	Yes	转录本	Pno02G016109t2	Pno02G016109t21288xxPlantKGA_431	Pno02G016109	L	partial	2	9639405	9644639	+	Pfam	PF14580	Leucine-rich repeat	-	1	173	MVRLTADLIWKSPHFFNALRERELDLRGNKIAVIENVGATEDQFDCIDLSDNEIVKLENFPYLNRLGTLLLNNNRITRINPSIGEFLPKLHSLVLTNNRLVNLVEIDPLASLPKLQFLSLLDNNITKKPNYRLYVIHKLKSLRLLDFKKVKLKERIEAANVFASQEAEEEAKK	3.9e-81	MVRLTADLIWKSPHFFNALRERELDLRGNKIAVIENVGATEDQFDCIDLSDNEIVKLENFPYLNRLGTLLLNNNRITRINPSIGEFLPKLHSLVLTNNRLVNLVEIDPLASLPKLQFLSLLDNNITKKPNYRLYVIHKLKSLRLLDFKKVKLKERIEAANVFASQEAEEEAKKESVKTFVPGEIPSTPEVSMEVQTPKNVTPTPEQIIAIKAAIVNSQTLEEVARLEQALKSGQLPADLDITDNDAMTNDENRREDKMVTDAENKANDGASNANNEQKNEGPADMEQVQLLRLATVVRTLLIII	304	5235	https://onlinelibrary.wiley.com/doi/full/10.1111/pbi.13558
PlantKGA_431	Apiales	Araliaceae	Panax	notoginseng	Panax notoginseng		三七	chromosome	Yes	转录本	Pno03G004072t1	Pno03G004072t11288xxPlantKGA_431	Pno03G004072	L	partial	3	183972849	183974928	-	Pfam	PF12799	Leucine Rich repeats (2 copies)	Leucine rich repeat 4	15	59	PNLVTLDASDCTSLDKLPDLSKLQNLQELDLSNCSRLTKIQGLIN	1.6e-06	MNNCTILQSILELPPNLVTLDASDCTSLDKLPDLSKLQNLQELDLSNCSRLTKIQGLINLNFLQTIHMEGYSNLTSTFVYSLFEGYSERAINCDVFLTGTEIPYWFNHQQIGSSISFDMPLDVENGLYIITFGITVYASKDWNCKSLSARAYISDRRNAVEWTLSAANKGTISFGEILWVSHLALRYFGHPIKGGERFEVSIAEDQSVKPLFSKSSKPKSIEAPNLAAPTYLAHDKTAIT	240	2080	https://onlinelibrary.wiley.com/doi/full/10.1111/pbi.13558
PlantKGA_431	Apiales	Araliaceae	Panax	notoginseng	Panax notoginseng		三七	chromosome	Yes	转录本	Pno03G004559t1	Pno03G004559t11288xxPlantKGA_431	Pno03G004559	L	partial	3	192927782	192939690	+	Pfam	PF13855	Leucine rich repeat	Leucine-rich repeat	443	503	RHLQSINLSGNSIHGTIPSSLGTVSSLEILDLSYNFFNGTIPESLGQLTSLRRLNLNSNSL	1.2e-09	MLKLLLLFFILSLATRPSHTRHSPYALRISCGARKDVYTPPTNTRWFKDSAYTGGMFTNATRPSFITPPLTTLRYFPLSEGPENCYNIRRVPNGHFSVRIFFGLVAEPSFDNEPLFDVSVEGTLIYSLPSGWSNHDELAFVEALVFLTDGTASLCFHSTGHGDPAILSIEILQVDDNAYSFGLHVGQGTILRTGKRLSCGAQHPKFDVDYSGDHWGGDRFWNSISTFGQHSDRAISTKNSIKQASHAPNFYAEALYQTALVSTDNQPDLSYTLDVDPNRNYSVWLHFAEIDPSVNQVGQRIFDIVINGDIKFQDVDIVNMTGDIHSALVLNTTVAVNGRSLAITLHPTKGSHAIVSAIEIFEVVMTESKTTIDEVRALQTLKSALGLPLRFGWNGDPCV…	623	11909	https://onlinelibrary.wiley.com/doi/full/10.1111/pbi.13558
PlantKGA_431	Apiales	Araliaceae	Panax	notoginseng	Panax notoginseng		三七	chromosome	Yes	转录本	Pno03G004725t1	Pno03G004725t11288xxPlantKGA_431	Pno03G004725	L	partial	3	195680923	195681930	-	Pfam	PF08263	Leucine rich repeat N-terminal domain	Leucine-rich repeat-containing N-terminal, plant-type	39	78	TDESTLLALKSSIISDPNHTLTNNWSVVKGSCCNWVGVTC	1.6e-09	MRRACIMALLLHTILRSCSAISTSLHHHHDHATLINITTDESTLLALKSSIISDPNHTLTNNWSVVKGSCCNWVGVTCGTRHKRIVALDLSTMGLIGTIPPQIGNLSFLVSLDLSNNSFSGSLPKELSGLRRLKKLSLRFNNFGGELPSWLGELTKLEHLSLAYNSFTGTIPPSFSNITKLVQLSLRSNSLRGSIPPEIGSLANLEEFDIQRNQLTGSIPPIIYNISTLTTIGLTNNSLSGNLPTDICKRIPKIEGLYLSLNKLSGPIPPSLHECSKLEVLALSYNEFSGIIPREIGNSTLLHTLSLNTNFLKGMDMMLAAAFNDHFLFFSTIII	335	1008	https://onlinelibrary.wiley.com/doi/full/10.1111/pbi.13558
PlantKGA_431	Apiales	Araliaceae	Panax	notoginseng	Panax notoginseng		三七	chromosome	Yes	转录本	Pno03G004725t1	Pno03G004725t11288xxPlantKGA_431	Pno03G004725	L	partial	3	195680923	195681930	-	Pfam	PF13855	Leucine rich repeat	Leucine-rich repeat	131	191	RRLKKLSLRFNNFGGELPSWLGELTKLEHLSLAYNSFTGTIPPSFSNITKLVQLSLRSNSL	7.7e-09	MRRACIMALLLHTILRSCSAISTSLHHHHDHATLINITTDESTLLALKSSIISDPNHTLTNNWSVVKGSCCNWVGVTCGTRHKRIVALDLSTMGLIGTIPPQIGNLSFLVSLDLSNNSFSGSLPKELSGLRRLKKLSLRFNNFGGELPSWLGELTKLEHLSLAYNSFTGTIPPSFSNITKLVQLSLRSNSLRGSIPPEIGSLANLEEFDIQRNQLTGSIPPIIYNISTLTTIGLTNNSLSGNLPTDICKRIPKIEGLYLSLNKLSGPIPPSLHECSKLEVLALSYNEFSGIIPREIGNSTLLHTLSLNTNFLKGMDMMLAAAFNDHFLFFSTIII	335	1008	https://onlinelibrary.wiley.com/doi/full/10.1111/pbi.13558
PlantKGA_431	Apiales	Araliaceae	Panax	notoginseng	Panax notoginseng		三七	chromosome	Yes	转录本	Pno03G004725t1	Pno03G004725t11288xxPlantKGA_431	Pno03G004725	L	partial	3	195680923	195681930	-	Pfam	PF00560	Leucine Rich Repeat	Leucine-rich repeat	109	130	LVSLDLSNNSFSGSLPKELSGL	1.6	MRRACIMALLLHTILRSCSAISTSLHHHHDHATLINITTDESTLLALKSSIISDPNHTLTNNWSVVKGSCCNWVGVTCGTRHKRIVALDLSTMGLIGTIPPQIGNLSFLVSLDLSNNSFSGSLPKELSGLRRLKKLSLRFNNFGGELPSWLGELTKLEHLSLAYNSFTGTIPPSFSNITKLVQLSLRSNSLRGSIPPEIGSLANLEEFDIQRNQLTGSIPPIIYNISTLTTIGLTNNSLSGNLPTDICKRIPKIEGLYLSLNKLSGPIPPSLHECSKLEVLALSYNEFSGIIPREIGNSTLLHTLSLNTNFLKGMDMMLAAAFNDHFLFFSTIII	335	1008	https://onlinelibrary.wiley.com/doi/full/10.1111/pbi.13558
PlantKGA_431	Apiales	Araliaceae	Panax	notoginseng	Panax notoginseng		三七	chromosome	Yes	转录本	Pno03G004980t1	Pno03G004980t11288xxPlantKGA_431	Pno03G004980	L	partial	3	199399596	199404920	+	Pfam	PF13516	Leucine Rich repeat	Leucine-rich repeat	198	216	LRHLQLFGNKLTNAGLLAI	0.078	MASTSNSDLLPADESRNWLELPTELMASILQRVGTIDILTSAQNVCTTWRRICKDSAMWRVIDIRCLGDSWEMDFDLEKMARHAVDLSCGELVDLNMEYFGSDELLQYISDRSSQLRRIRLVCCYSISNEGLGEMVKKLPLLEELHLYYIRISKQAIEFTGRFCPLLKSFKLNNLGYRYPQIECDEEALAIADNMPGLRHLQLFGNKLTNAGLLAILGNCHHLESLDLRQCFNVKLGADLGKRCSEQVRDLRRPFDSTEDYGFDAEIHDWDSFEEEYPSGLSDIDIVSDYDDSYVFSGGSGISDNDYHDDEGLFDD	316	5325	https://onlinelibrary.wiley.com/doi/full/10.1111/pbi.13558
PlantKGA_431	Apiales	Araliaceae	Panax	notoginseng	Panax notoginseng		三七	chromosome	Yes	转录本	Pno04G002402t1	Pno04G002402t11288xxPlantKGA_431	Pno04G002402	L	partial	4	153637774	153638474	-	Pfam	PF00560	Leucine Rich Repeat	Leucine-rich repeat	52	74	SLEKLSLHNNNLTGSIPSSLGKL	0.36	MLKSLNELYLYQNNLFGKVPSEIGLLTNLRICYMYSNQLSGSIPQEIGMLSSLEKLSLHNNNLTGSIPSSLGKLKFLVDLSLFTNDLTGSIPPEMNNLTYLKEFHISENMLIGHLLQDICRGGLLEWFSAGNISEDFGLYPKLDYIDLSDNMFYGHLSLKWGLCQNLKTLKIANNYLTGTLTPEFGKATQLGLLDLSSNHIAS	203	701	https://onlinelibrary.wiley.com/doi/full/10.1111/pbi.13558
PlantKGA_431	Apiales	Araliaceae	Panax	notoginseng	Panax notoginseng		三七	chromosome	Yes	转录本	Pno04G002403t1	Pno04G002403t11288xxPlantKGA_431	Pno04G002403	L	partial	4	153638758	153642822	-	Pfam	PF13855	Leucine rich repeat	Leucine-rich repeat	485	543	SLEELVLFANNLTGSIPSTIGSLGNLTILYLYKNLLVSSIPKEIGKLRSLTELDLSGNH	4.5e-09	MAFMPATNIFLSSSSESLASLECRNESEYVNDGESSSTEVMVPYVGQLFSKLEEAKKFYRSYAQKSGFEIRIPTSRKHAHSNDLTSRLYVCKKAGRPTVVKNSLDDECDNDKKTRQQDTVGRTLCKDRMYVVYGKKEVNWRISIIELDHNHHLVTPTKVDLIETHRNITPVERKLIDTVNKAGIGPSRMMNVLSTMGGGMQNIGFSDKDVRNVVRDFRRDSEDENDAQPAINYMKNFDSSSASKFFFQVKSGEDNRITCILWVDAQSRFMYQRFGDVVTFDITYRTNRYSVPFVPFTEVNHHYHSVLFGFSLLRDKTEDTFSWVLETWLEAMDYKALVTIITNQDKAMSNAIVAILLVSSSKQVQLEDEAAALLTWKARLDHNRSQSLSSWAGRNSPCN…	572	4065	https://onlinelibrary.wiley.com/doi/full/10.1111/pbi.13558
PlantKGA_431	Apiales	Araliaceae	Panax	notoginseng	Panax notoginseng		三七	chromosome	Yes	转录本	Pno04G002403t1	Pno04G002403t11288xxPlantKGA_431	Pno04G002403	L	partial	4	153638758	153642822	-	Pfam	PF08263	Leucine rich repeat N-terminal domain	Leucine-rich repeat-containing N-terminal, plant-type	367	407	EDEAAALLTWKARLDHNRSQSLSSWAGRNSPCNNWTGIGCN	3.1e-08	MAFMPATNIFLSSSSESLASLECRNESEYVNDGESSSTEVMVPYVGQLFSKLEEAKKFYRSYAQKSGFEIRIPTSRKHAHSNDLTSRLYVCKKAGRPTVVKNSLDDECDNDKKTRQQDTVGRTLCKDRMYVVYGKKEVNWRISIIELDHNHHLVTPTKVDLIETHRNITPVERKLIDTVNKAGIGPSRMMNVLSTMGGGMQNIGFSDKDVRNVVRDFRRDSEDENDAQPAINYMKNFDSSSASKFFFQVKSGEDNRITCILWVDAQSRFMYQRFGDVVTFDITYRTNRYSVPFVPFTEVNHHYHSVLFGFSLLRDKTEDTFSWVLETWLEAMDYKALVTIITNQDKAMSNAIVAILLVSSSKQVQLEDEAAALLTWKARLDHNRSQSLSSWAGRNSPCN…	572	4065	https://onlinelibrary.wiley.com/doi/full/10.1111/pbi.13558
PlantKGA_431	Apiales	Araliaceae	Panax	notoginseng	Panax notoginseng		三七	chromosome	Yes	转录本	Pno04G002787t1	Pno04G002787t11288xxPlantKGA_431	Pno04G002787	L	partial	4	161500684	161570862	+	Pfam	PF13855	Leucine rich repeat	Leucine-rich repeat	1064	1123	PNLRYLHLRGNRFTGSIPESYVNLSSLLTLDLNDNNLSGGIPNYIGALPNLRILLLGRNY	8.7e-08	MEQPLKRIFVLVFFIILVSYVSGHKGCFEEERKGLLELKEVMGFMNQSSIINNEFEFLLSDWVDIEGKNECCKWSRVTCNHTTGHVIKISLGEMYRDSSMNSWSLNLSLFLPFKELQSLNLSSTHIDGWTKSEGLTYLPHLEILDLSWNDFGGSIPSFIWELSTLKALYLRGNEFDGSLPMQGFTSLHHLEILDLSRNQFGGSIPPSIWSLSSLKALSLTRNQLNGSLPMQGFCELKKLQELDFSYNNLEGTLPPCLINLTSLRVLDLYRNRFTGNISSSLIASLAALEYIDLSHNHFEGLLSFSSFANHSKLQVVQIKSDNPKFEVETESINWIPLFQLKSLVLSNCNLNKVPKFLFHQQRLRVLDLSGNLLDGRFPSWLLENNTELEVLSLRNNSFS…	1399	70179	https://onlinelibrary.wiley.com/doi/full/10.1111/pbi.13558
PlantKGA_431	Apiales	Araliaceae	Panax	notoginseng	Panax notoginseng		三七	chromosome	Yes	转录本	Pno04G002787t1	Pno04G002787t11288xxPlantKGA_431	Pno04G002787	L	partial	4	161500684	161570862	+	Pfam	PF13855	Leucine rich repeat	Leucine-rich repeat	164	224	TLKALYLRGNEFDGSLPMQGFTSLHHLEILDLSRNQFGGSIPPSIWSLSSLKALSLTRNQL	9.3e-09	MEQPLKRIFVLVFFIILVSYVSGHKGCFEEERKGLLELKEVMGFMNQSSIINNEFEFLLSDWVDIEGKNECCKWSRVTCNHTTGHVIKISLGEMYRDSSMNSWSLNLSLFLPFKELQSLNLSSTHIDGWTKSEGLTYLPHLEILDLSWNDFGGSIPSFIWELSTLKALYLRGNEFDGSLPMQGFTSLHHLEILDLSRNQFGGSIPPSIWSLSSLKALSLTRNQLNGSLPMQGFCELKKLQELDFSYNNLEGTLPPCLINLTSLRVLDLYRNRFTGNISSSLIASLAALEYIDLSHNHFEGLLSFSSFANHSKLQVVQIKSDNPKFEVETESINWIPLFQLKSLVLSNCNLNKVPKFLFHQQRLRVLDLSGNLLDGRFPSWLLENNTELEVLSLRNNSFS…	1399	70179	https://onlinelibrary.wiley.com/doi/full/10.1111/pbi.13558
PlantKGA_431	Apiales	Araliaceae	Panax	notoginseng	Panax notoginseng		三七	chromosome	Yes	转录本	Pno04G002787t1	Pno04G002787t11288xxPlantKGA_431	Pno04G002787	L	partial	4	161500684	161570862	+	Pfam	PF13855	Leucine rich repeat	Leucine-rich repeat	842	902	KLQELDFSFNNLEGTLPPCLNNLTSLRVLDLSRNQFTGNISPSLIASLTSLEYIDLSYNNF	6.3e-09	MEQPLKRIFVLVFFIILVSYVSGHKGCFEEERKGLLELKEVMGFMNQSSIINNEFEFLLSDWVDIEGKNECCKWSRVTCNHTTGHVIKISLGEMYRDSSMNSWSLNLSLFLPFKELQSLNLSSTHIDGWTKSEGLTYLPHLEILDLSWNDFGGSIPSFIWELSTLKALYLRGNEFDGSLPMQGFTSLHHLEILDLSRNQFGGSIPPSIWSLSSLKALSLTRNQLNGSLPMQGFCELKKLQELDFSYNNLEGTLPPCLINLTSLRVLDLYRNRFTGNISSSLIASLAALEYIDLSHNHFEGLLSFSSFANHSKLQVVQIKSDNPKFEVETESINWIPLFQLKSLVLSNCNLNKVPKFLFHQQRLRVLDLSGNLLDGRFPSWLLENNTELEVLSLRNNSFS…	1399	70179	https://onlinelibrary.wiley.com/doi/full/10.1111/pbi.13558
PlantKGA_431	Apiales	Araliaceae	Panax	notoginseng	Panax notoginseng		三七	chromosome	Yes	转录本	Pno04G002787t1	Pno04G002787t11288xxPlantKGA_431	Pno04G002787	L	partial	4	161500684	161570862	+	Pfam	PF13516	Leucine Rich repeat	Leucine-rich repeat	138	153	LPHLEILDLSWNDFGG	0.085	MEQPLKRIFVLVFFIILVSYVSGHKGCFEEERKGLLELKEVMGFMNQSSIINNEFEFLLSDWVDIEGKNECCKWSRVTCNHTTGHVIKISLGEMYRDSSMNSWSLNLSLFLPFKELQSLNLSSTHIDGWTKSEGLTYLPHLEILDLSWNDFGGSIPSFIWELSTLKALYLRGNEFDGSLPMQGFTSLHHLEILDLSRNQFGGSIPPSIWSLSSLKALSLTRNQLNGSLPMQGFCELKKLQELDFSYNNLEGTLPPCLINLTSLRVLDLYRNRFTGNISSSLIASLAALEYIDLSHNHFEGLLSFSSFANHSKLQVVQIKSDNPKFEVETESINWIPLFQLKSLVLSNCNLNKVPKFLFHQQRLRVLDLSGNLLDGRFPSWLLENNTELEVLSLRNNSFS…	1399	70179	https://onlinelibrary.wiley.com/doi/full/10.1111/pbi.13558
PlantKGA_431	Apiales	Araliaceae	Panax	notoginseng	Panax notoginseng		三七	chromosome	Yes	转录本	Pno04G002787t1	Pno04G002787t11288xxPlantKGA_431	Pno04G002787	L	partial	4	161500684	161570862	+	Pfam	PF00560	Leucine Rich Repeat	Leucine-rich repeat	238	260	KLQELDFSYNNLEGTLPPCLINL	0.75	MEQPLKRIFVLVFFIILVSYVSGHKGCFEEERKGLLELKEVMGFMNQSSIINNEFEFLLSDWVDIEGKNECCKWSRVTCNHTTGHVIKISLGEMYRDSSMNSWSLNLSLFLPFKELQSLNLSSTHIDGWTKSEGLTYLPHLEILDLSWNDFGGSIPSFIWELSTLKALYLRGNEFDGSLPMQGFTSLHHLEILDLSRNQFGGSIPPSIWSLSSLKALSLTRNQLNGSLPMQGFCELKKLQELDFSYNNLEGTLPPCLINLTSLRVLDLYRNRFTGNISSSLIASLAALEYIDLSHNHFEGLLSFSSFANHSKLQVVQIKSDNPKFEVETESINWIPLFQLKSLVLSNCNLNKVPKFLFHQQRLRVLDLSGNLLDGRFPSWLLENNTELEVLSLRNNSFS…	1399	70179	https://onlinelibrary.wiley.com/doi/full/10.1111/pbi.13558
PlantKGA_431	Apiales	Araliaceae	Panax	notoginseng	Panax notoginseng		三七	chromosome	Yes	转录本	Pno04G002924t1	Pno04G002924t11288xxPlantKGA_431	Pno04G002924	L	partial	4	164216350	164221119	-	Pfam	PF13516	Leucine Rich repeat	Leucine-rich repeat	236	259	CPDLRVLDLCGCVLITDASVIALA	1.4	MIGAEGLKSESLDLCFERMMVVAGGGGYGGGMKMGGGGVITEWKDIPMELLLRIVSLVDDRTVVVASGVCSGWRDAICWGLTNLSLSWCKNNMNNLVLSLAPKFTKLRVLVLRQDKSQLQDNAVETIANCCHELQDLDLSKSFKLTNCCLYALAHGCPNLTKLNISGCSAFSDTALSYLSKFCRKLKILNLCGCVKAASDTALKDIGYNCNQLQYLNLGWCENVGDIGVMSLAYGCPDLRVLDLCGCVLITDASVIALANNCLHLRSLGLYYCQNITDTAMYALAHSRVKNKHEVWESVRNRFEEEGLRNLNISQCTALTPPAVQALCDSFPALHTCPGRHSLIISGCLNLTSVHCACGVQAHRTANTLSHPAH	374	4770	https://onlinelibrary.wiley.com/doi/full/10.1111/pbi.13558
PlantKGA_431	Apiales	Araliaceae	Panax	notoginseng	Panax notoginseng		三七	chromosome	Yes	转录本	Pno04G002924t1	Pno04G002924t11288xxPlantKGA_431	Pno04G002924	L	partial	4	164216350	164221119	-	Pfam	PF13516	Leucine Rich repeat	Leucine-rich repeat	157	179	CPNLTKLNISGCSAFSDTALSYL	0.55	MIGAEGLKSESLDLCFERMMVVAGGGGYGGGMKMGGGGVITEWKDIPMELLLRIVSLVDDRTVVVASGVCSGWRDAICWGLTNLSLSWCKNNMNNLVLSLAPKFTKLRVLVLRQDKSQLQDNAVETIANCCHELQDLDLSKSFKLTNCCLYALAHGCPNLTKLNISGCSAFSDTALSYLSKFCRKLKILNLCGCVKAASDTALKDIGYNCNQLQYLNLGWCENVGDIGVMSLAYGCPDLRVLDLCGCVLITDASVIALANNCLHLRSLGLYYCQNITDTAMYALAHSRVKNKHEVWESVRNRFEEEGLRNLNISQCTALTPPAVQALCDSFPALHTCPGRHSLIISGCLNLTSVHCACGVQAHRTANTLSHPAH	374	4770	https://onlinelibrary.wiley.com/doi/full/10.1111/pbi.13558
PlantKGA_431	Apiales	Araliaceae	Panax	notoginseng	Panax notoginseng		三七	chromosome	Yes	转录本	Pno04G002924t1	Pno04G002924t11288xxPlantKGA_431	Pno04G002924	L	partial	4	164216350	164221119	-	Pfam	PF13516	Leucine Rich repeat	Leucine-rich repeat	210	233	CNQLQYLNLGWCENVGDIGVMSLA	0.0077	MIGAEGLKSESLDLCFERMMVVAGGGGYGGGMKMGGGGVITEWKDIPMELLLRIVSLVDDRTVVVASGVCSGWRDAICWGLTNLSLSWCKNNMNNLVLSLAPKFTKLRVLVLRQDKSQLQDNAVETIANCCHELQDLDLSKSFKLTNCCLYALAHGCPNLTKLNISGCSAFSDTALSYLSKFCRKLKILNLCGCVKAASDTALKDIGYNCNQLQYLNLGWCENVGDIGVMSLAYGCPDLRVLDLCGCVLITDASVIALANNCLHLRSLGLYYCQNITDTAMYALAHSRVKNKHEVWESVRNRFEEEGLRNLNISQCTALTPPAVQALCDSFPALHTCPGRHSLIISGCLNLTSVHCACGVQAHRTANTLSHPAH	374	4770	https://onlinelibrary.wiley.com/doi/full/10.1111/pbi.13558
PlantKGA_431	Apiales	Araliaceae	Panax	notoginseng	Panax notoginseng		三七	chromosome	Yes	转录本	Pno04G002924t1	Pno04G002924t11288xxPlantKGA_431	Pno04G002924	L	partial	4	164216350	164221119	-	Pfam	PF13516	Leucine Rich repeat	Leucine-rich repeat	262	285	CLHLRSLGLYYCQNITDTAMYALA	0.3	MIGAEGLKSESLDLCFERMMVVAGGGGYGGGMKMGGGGVITEWKDIPMELLLRIVSLVDDRTVVVASGVCSGWRDAICWGLTNLSLSWCKNNMNNLVLSLAPKFTKLRVLVLRQDKSQLQDNAVETIANCCHELQDLDLSKSFKLTNCCLYALAHGCPNLTKLNISGCSAFSDTALSYLSKFCRKLKILNLCGCVKAASDTALKDIGYNCNQLQYLNLGWCENVGDIGVMSLAYGCPDLRVLDLCGCVLITDASVIALANNCLHLRSLGLYYCQNITDTAMYALAHSRVKNKHEVWESVRNRFEEEGLRNLNISQCTALTPPAVQALCDSFPALHTCPGRHSLIISGCLNLTSVHCACGVQAHRTANTLSHPAH	374	4770	https://onlinelibrary.wiley.com/doi/full/10.1111/pbi.13558
PlantKGA_431	Apiales	Araliaceae	Panax	notoginseng	Panax notoginseng		三七	chromosome	Yes	转录本	Pno04G003900t1	Pno04G003900t11288xxPlantKGA_431	Pno04G003900	L	partial	4	184283143	184287321	+	Pfam	PF00560	Leucine Rich Repeat	Leucine-rich repeat	421	440	NLRELNLSFNELGSVPESLC	1.2	MESSSPKSIDEVVEEITRIHRSLQKRPGVEEIEAAKILIRNVELEDQARFDAIARQTKNLEVPEELFIILLEMQKNLVLFRSKEQRREVVRLLDLENFHSVFDELIQRASRCLPSEMGSNSQSTVSNSSRSFSLTNSASFSYSSPVTTPSSSLFYEKEAVKASSESFSRDDSYVKKAKSTFYSDGIGAGLRSGDVLNPQIVDSTLKPVISSGQDGEKLSLIKLASLIEVSSKKGTRDLNLRSKLMEQIEWLPDSIGKLLSLITLDLSENRIVALPATVGGLSSLTKLDLHSNRIGELPETIGDMLSLVCLDLGGNQLASLPATFGRMVRLQELDLSSNLLPLLPESIGSLVSLKNLNIETNNIEEIPHTIAHCSSLKELRADYNRLKALPEAIGRIASL…	564	4179	https://onlinelibrary.wiley.com/doi/full/10.1111/pbi.13558
PlantKGA_431	Apiales	Araliaceae	Panax	notoginseng	Panax notoginseng		三七	chromosome	Yes	转录本	Pno04G003900t1	Pno04G003900t11288xxPlantKGA_431	Pno04G003900	L	partial	4	184283143	184287321	+	Pfam	PF13855	Leucine rich repeat	Leucine-rich repeat	444	503	TLVKMNIGNNFADLQFLPRSIGNLEMLEELDMSNNQIRILPDSFRMLSKLRVLNVEGNPL	6.7e-08	MESSSPKSIDEVVEEITRIHRSLQKRPGVEEIEAAKILIRNVELEDQARFDAIARQTKNLEVPEELFIILLEMQKNLVLFRSKEQRREVVRLLDLENFHSVFDELIQRASRCLPSEMGSNSQSTVSNSSRSFSLTNSASFSYSSPVTTPSSSLFYEKEAVKASSESFSRDDSYVKKAKSTFYSDGIGAGLRSGDVLNPQIVDSTLKPVISSGQDGEKLSLIKLASLIEVSSKKGTRDLNLRSKLMEQIEWLPDSIGKLLSLITLDLSENRIVALPATVGGLSSLTKLDLHSNRIGELPETIGDMLSLVCLDLGGNQLASLPATFGRMVRLQELDLSSNLLPLLPESIGSLVSLKNLNIETNNIEEIPHTIAHCSSLKELRADYNRLKALPEAIGRIASL…	564	4179	https://onlinelibrary.wiley.com/doi/full/10.1111/pbi.13558
PlantKGA_431	Apiales	Araliaceae	Panax	notoginseng	Panax notoginseng		三七	chromosome	Yes	转录本	Pno04G003900t1	Pno04G003900t11288xxPlantKGA_431	Pno04G003900	L	partial	4	184283143	184287321	+	Pfam	PF13855	Leucine rich repeat	Leucine-rich repeat	252	294	PDSIGKLLSLITLDLSENRIVALPATVGGLSSLTKLDLHSNRI	1.1e-06	MESSSPKSIDEVVEEITRIHRSLQKRPGVEEIEAAKILIRNVELEDQARFDAIARQTKNLEVPEELFIILLEMQKNLVLFRSKEQRREVVRLLDLENFHSVFDELIQRASRCLPSEMGSNSQSTVSNSSRSFSLTNSASFSYSSPVTTPSSSLFYEKEAVKASSESFSRDDSYVKKAKSTFYSDGIGAGLRSGDVLNPQIVDSTLKPVISSGQDGEKLSLIKLASLIEVSSKKGTRDLNLRSKLMEQIEWLPDSIGKLLSLITLDLSENRIVALPATVGGLSSLTKLDLHSNRIGELPETIGDMLSLVCLDLGGNQLASLPATFGRMVRLQELDLSSNLLPLLPESIGSLVSLKNLNIETNNIEEIPHTIAHCSSLKELRADYNRLKALPEAIGRIASL…	564	4179	https://onlinelibrary.wiley.com/doi/full/10.1111/pbi.13558
PlantKGA_431	Apiales	Araliaceae	Panax	notoginseng	Panax notoginseng		三七	chromosome	Yes	转录本	Pno04G004219t1	Pno04G004219t11288xxPlantKGA_431	Pno04G004219	L	partial	4	188329152	188330984	+	Pfam	PF13516	Leucine Rich repeat	Leucine-rich repeat	357	370	LRKLRKLDLSHNDL	0.79	MMDTILCDELLQEIFHRLPPSSSSAVSLVSKRWLRLLRFSQSSLSLRFAPPFDNLTFISSFSSFLSHHPFLSSLSISTPTAAAAAFSDSLLFSVSTSCPNIQHLRYLTGPVSLFSLFSLSNSCSRLSSLTISLFRPLSFHWLIHFLSLQNLSIICAGVEPEEFNSIQFNSEADFELESLCLTGIRAGDYGVNWLWRNCKKLKKLEFRSCETVGDNYSFLGFMNCLKGLQEVELRTCRGIVDGVLFNLAENCTSLNSLLIYDGGSKEGLLQFIRQCRCNLKKLDLRLPLDLDNNHLLSIAEKFRGLSIFRLQSCCLVIGEGLKNLGVALSDDLEELALINCDVIDRERGLLSTLGQNLRKLRKLDLSHNDLLPDKELMSMLVSTNYLQELKLRGCGGLTN…	465	1833	https://onlinelibrary.wiley.com/doi/full/10.1111/pbi.13558
PlantKGA_431	Apiales	Araliaceae	Panax	notoginseng	Panax notoginseng		三七	chromosome	Yes	转录本	Pno04G004822t1	Pno04G004822t11288xxPlantKGA_431	Pno04G004822	L	partial	4	196250458	196253081	-	Pfam	PF13516	Leucine Rich repeat	Leucine-rich repeat	132	155	CPNLTRLKLRGCRELTDLGMTAFA	0.028	MGLSFSSQGLQPSSSYRMTSRSEVPSLIQDYTTDGFMGNQDLISELPDACLALIFQSLSSGDRKRCSLVCRRWLLVEGQNRHRISLNAGADLLFHVPDLFSRFDSITKLALRCDRRSKSINDDALTLISLRCPNLTRLKLRGCRELTDLGMTAFAKNSKGLKKFSCGSCMFGAKGMNAVLDHCSSLEELSVNRLRGINDGGAAEPIGPGVAASSLKSICLKELYNGQCFGPLITGSNNLKSLKLLRCLGDWDMLLEMVANGKNNLVEIHLERLQVSDVGLIALSNCPQLEILHVVKTPDCTNAGVVSVAEHCKLLRKLHIDGWRTNRIGDEGLIAIAKHSAKLQELVLIGVNPSSLSLEAIASGCQKLERLALCGSETIADAEISCIATKCAALKKLCI…	527	2624	https://onlinelibrary.wiley.com/doi/full/10.1111/pbi.13558
PlantKGA_431	Apiales	Araliaceae	Panax	notoginseng	Panax notoginseng		三七	chromosome	Yes	转录本	Pno04G004822t1	Pno04G004822t11288xxPlantKGA_431	Pno04G004822	L	partial	4	196250458	196253081	-	Pfam	PF13516	Leucine Rich repeat	Leucine-rich repeat	326	337	NRIGDEGLIAIA	0.92	MGLSFSSQGLQPSSSYRMTSRSEVPSLIQDYTTDGFMGNQDLISELPDACLALIFQSLSSGDRKRCSLVCRRWLLVEGQNRHRISLNAGADLLFHVPDLFSRFDSITKLALRCDRRSKSINDDALTLISLRCPNLTRLKLRGCRELTDLGMTAFAKNSKGLKKFSCGSCMFGAKGMNAVLDHCSSLEELSVNRLRGINDGGAAEPIGPGVAASSLKSICLKELYNGQCFGPLITGSNNLKSLKLLRCLGDWDMLLEMVANGKNNLVEIHLERLQVSDVGLIALSNCPQLEILHVVKTPDCTNAGVVSVAEHCKLLRKLHIDGWRTNRIGDEGLIAIAKHSAKLQELVLIGVNPSSLSLEAIASGCQKLERLALCGSETIADAEISCIATKCAALKKLCI…	527	2624	https://onlinelibrary.wiley.com/doi/full/10.1111/pbi.13558
PlantKGA_431	Apiales	Araliaceae	Panax	notoginseng	Panax notoginseng		三七	chromosome	Yes	转录本	Pno04G005165t1	Pno04G005165t11288xxPlantKGA_431	Pno04G005165	L	partial	4	201007130	201008762	+	Pfam	PF13855	Leucine rich repeat	Leucine-rich repeat	257	312	KMDLSHNRLSGPIPDSFKLMENLVVMDISYNSLSGPLPFSFQSMNSLQALILNGNP	3.7e-09	MLISLSPQLIFLLTLTCLPLGTPFTVIMSDSGNPSALVDAPQTGFSMNNNGARTDPHEQEAVYDVMKATGNEWATEIPDVCRGRWHGIECMPDKDNVYHVVSLSFGALSDDTAFPICDPTRSFISPSITKLPHIRNLFFYRCLNYDPQPIPSFLGQLGSTLQTLVLRENGHVGPIPNGLGNLTRLRVLDLHKNSLNDSIPVSLGRIAGLRSLDLSANKLTGSIANLSFSSLNILDLNQNLLNGFIPTTLGSFHSLIKMDLSHNRLSGPIPDSFKLMENLVVMDISYNSLSGPLPFSFQSMNSLQALILNGNPMVHSTIPDDGFDGLKDLMILVLSDMNLHGSIPESLGRLPNLRVLHLDGNRLNGSVPSSFRNLNNLGELRLNNNQLTGRVPFGREMAW…	496	1633	https://onlinelibrary.wiley.com/doi/full/10.1111/pbi.13558
PlantKGA_431	Apiales	Araliaceae	Panax	notoginseng	Panax notoginseng		三七	chromosome	Yes	转录本	Pno04G005165t1	Pno04G005165t11288xxPlantKGA_431	Pno04G005165	L	partial	4	201007130	201008762	+	Pfam	PF13855	Leucine rich repeat	Leucine-rich repeat	317	363	TIPDDGFDGLKDLMILVLSDMNLHGSIPESLGRLPNLRVLHLDGNRL	2.1e-07	MLISLSPQLIFLLTLTCLPLGTPFTVIMSDSGNPSALVDAPQTGFSMNNNGARTDPHEQEAVYDVMKATGNEWATEIPDVCRGRWHGIECMPDKDNVYHVVSLSFGALSDDTAFPICDPTRSFISPSITKLPHIRNLFFYRCLNYDPQPIPSFLGQLGSTLQTLVLRENGHVGPIPNGLGNLTRLRVLDLHKNSLNDSIPVSLGRIAGLRSLDLSANKLTGSIANLSFSSLNILDLNQNLLNGFIPTTLGSFHSLIKMDLSHNRLSGPIPDSFKLMENLVVMDISYNSLSGPLPFSFQSMNSLQALILNGNPMVHSTIPDDGFDGLKDLMILVLSDMNLHGSIPESLGRLPNLRVLHLDGNRLNGSVPSSFRNLNNLGELRLNNNQLTGRVPFGREMAW…	496	1633	https://onlinelibrary.wiley.com/doi/full/10.1111/pbi.13558
PlantKGA_431	Apiales	Araliaceae	Panax	notoginseng	Panax notoginseng		三七	chromosome	Yes	转录本	Pno04G005165t1	Pno04G005165t11288xxPlantKGA_431	Pno04G005165	L	partial	4	201007130	201008762	+	Pfam	PF13855	Leucine rich repeat	Leucine-rich repeat	160	219	TLQTLVLRENGHVGPIPNGLGNLTRLRVLDLHKNSLNDSIPVSLGRIAGLRSLDLSANKL	3.2e-07	MLISLSPQLIFLLTLTCLPLGTPFTVIMSDSGNPSALVDAPQTGFSMNNNGARTDPHEQEAVYDVMKATGNEWATEIPDVCRGRWHGIECMPDKDNVYHVVSLSFGALSDDTAFPICDPTRSFISPSITKLPHIRNLFFYRCLNYDPQPIPSFLGQLGSTLQTLVLRENGHVGPIPNGLGNLTRLRVLDLHKNSLNDSIPVSLGRIAGLRSLDLSANKLTGSIANLSFSSLNILDLNQNLLNGFIPTTLGSFHSLIKMDLSHNRLSGPIPDSFKLMENLVVMDISYNSLSGPLPFSFQSMNSLQALILNGNPMVHSTIPDDGFDGLKDLMILVLSDMNLHGSIPESLGRLPNLRVLHLDGNRLNGSVPSSFRNLNNLGELRLNNNQLTGRVPFGREMAW…	496	1633	https://onlinelibrary.wiley.com/doi/full/10.1111/pbi.13558
PlantKGA_431	Apiales	Araliaceae	Panax	notoginseng	Panax notoginseng		三七	chromosome	Yes	转录本	Pno04G007874t1	Pno04G007874t11288xxPlantKGA_431	Pno04G007874	L	partial	4	36580100	36586146	+	Pfam	PF08263	Leucine rich repeat N-terminal domain	Leucine-rich repeat-containing N-terminal, plant-type	31	67	GDALNALKNNLADPNNVLQSWDPTLFNSCTWFHVTCN	8.1e-08	MVVWDISRSLVLSALQMAFDVPFEDVFFSSGDALNALKNNLADPNNVLQSWDPTLFNSCTWFHVTCNSENSVTRVLVSFQLCSTCKSSFCEMSGGKGLLYAYSMKEDQIHTPELISKPIAEIEAHNETNSNEVVVLENVVPDLEMLELTDSDTDIKVEADQASTEVQDLRNKIMPPRRQTRNQRAEESVNNAEGQQQDPMQNFANMVAQAMQQGIPATGNQPDNRLAKFKDFKAVGPPEFKGSVDPIEVRT	251	6047	https://onlinelibrary.wiley.com/doi/full/10.1111/pbi.13558
PlantKGA_431	Apiales	Araliaceae	Panax	notoginseng	Panax notoginseng		三七	chromosome	Yes	转录本	Pno04G010499t2	Pno04G010499t21288xxPlantKGA_431	Pno04G010499	L	partial	4	533237	538586	+	Pfam	PF13516	Leucine Rich repeat	Leucine-rich repeat	115	136	STLKELDLSRCSKVTDAGIRHL	0.076	MAIEMDSRLINMCIDAATQSRDAVEAWRRQRRTLERLPSHLAEALVIRLHSHRLLFPSLLEVFKNTVEKIDLRGESTVDAEWMAYLGAFRYLHSLNVADCHKINSFAIWPLAGMSTLKELDLSRCSKVTDAGIRHLLSIPTLEELCISETGVTANGVTLLSSLKNLSMLDLGGLHITDLVLGSLQVLTKLQYLDIWGSEVSNKGVAVLEMFPKLSFLNLAWTKVTKLPKLSSIACLNMSNCTIHSIFEGWGHNLHLTKLILTGATIADEFEAFSYVDTSFLTFLDLSNSSLHKFCFLPDMIALEYLDLSSSSFGDDSVEMIACVGANLKFLNLSCTKVSSTGLGILARHVPNLETLLLFRTPTDDHAISYISTMPSLKVINLSSTYISGQIQQIGAEPD…	596	5350	https://onlinelibrary.wiley.com/doi/full/10.1111/pbi.13558
PlantKGA_431	Apiales	Araliaceae	Panax	notoginseng	Panax notoginseng		三七	chromosome	Yes	转录本	Pno04G017248t1	Pno04G017248t11288xxPlantKGA_431	Pno04G017248	L	partial	4	94516864	94533344	+	Pfam	PF13855	Leucine rich repeat	Leucine-rich repeat	50	109	NIQILGLNQNRLTGPIPEVTSQFLRLNYLNFSHNSLSSSLPNVITKFPKLTILDLSSNQL	2.1e-08	MITATTLRTLNLSSNGLSGELPLVTGSCAILDLSNNQFEGNLTKLLKWGNIQILGLNQNRLTGPIPEVTSQFLRLNYLNFSHNSLSSSLPNVITKFPKLTILDLSSNQLNGPLLPTLLTLRTLQELHLENNILVGSVEFSPSSSDEPSLRILDLSHKQLRGYFPDGFASLTGLQDLNLRPQFFFLSVSDLYLRGSLYVEGFKCTAGGQTITAQPAGMVPASPNYSLVLYYAADRLVKDNSLLGQFVNGTDMFRDSRLQLIPSIKEGYWMVKRAVGTKACLLGKAVTCKYLRQDNFLEKRYRWDDAHASVIQALFWQKCAVQTKDNLNKERQKALHNAEIDHPGQGEQYMHEHCPWWCAHPMWVQMCEQWRAESWVKRRKTAASNRSLGVSEREKAKGTY…	567	16481	https://onlinelibrary.wiley.com/doi/full/10.1111/pbi.13558
PlantKGA_431	Apiales	Araliaceae	Panax	notoginseng	Panax notoginseng		三七	chromosome	Yes	转录本	Pno05G003076t2	Pno05G003076t21288xxPlantKGA_431	Pno05G003076	L	partial	5	169288702	169292033	-	Pfam	PF13516	Leucine Rich repeat	Leucine-rich repeat	483	498	LRWLETLDLSHNHLSG	0.17	MLKNLKQLRLGHNIFWGSIPATIGSLSFLEELNLSFNKMSGTIPTTLGQLSQLKDLNIEGNPCHGVITEAHLMNLTSLQSLAVNTNTTDKQLVFNVTSEWDPPFRLKYLDLGNCLLGPTFPAWLRVQSKLDHVNLHNAGIKDSIPEEWFLKISSQITDLDLSDNRIKGKLPHKLKSPKVGFIDLRNNHFEGSLPLWSTSAHSFYLQNNLFSGHIPNNIGELMPHLEVLNLSENHLNGMIPSSICALSRLLVLSLRNNQLSGKLPQCWDEMQPPISALDVANNNISGNIPSSLGYLGFLYVLILSNNTLDGEIPPSLQNCSDLKILDLGRNRLSGNLPLWIGKDFTPFWILSLRSNSFNGTIPTQWCNLLTLHILDLAHNNLSGVIPNSLGNLSSLQASS…	611	3332	https://onlinelibrary.wiley.com/doi/full/10.1111/pbi.13558
PlantKGA_431	Apiales	Araliaceae	Panax	notoginseng	Panax notoginseng		三七	chromosome	Yes	转录本	Pno05G003076t2	Pno05G003076t21288xxPlantKGA_431	Pno05G003076	L	partial	5	169288702	169292033	-	Pfam	PF13855	Leucine rich repeat	Leucine-rich repeat	4	62	NLKQLRLGHNIFWGSIPATIGSLSFLEELNLSFNKMSGTIPTTLGQLSQLKDLNIEGNP	3.3e-07	MLKNLKQLRLGHNIFWGSIPATIGSLSFLEELNLSFNKMSGTIPTTLGQLSQLKDLNIEGNPCHGVITEAHLMNLTSLQSLAVNTNTTDKQLVFNVTSEWDPPFRLKYLDLGNCLLGPTFPAWLRVQSKLDHVNLHNAGIKDSIPEEWFLKISSQITDLDLSDNRIKGKLPHKLKSPKVGFIDLRNNHFEGSLPLWSTSAHSFYLQNNLFSGHIPNNIGELMPHLEVLNLSENHLNGMIPSSICALSRLLVLSLRNNQLSGKLPQCWDEMQPPISALDVANNNISGNIPSSLGYLGFLYVLILSNNTLDGEIPPSLQNCSDLKILDLGRNRLSGNLPLWIGKDFTPFWILSLRSNSFNGTIPTQWCNLLTLHILDLAHNNLSGVIPNSLGNLSSLQASS…	611	3332	https://onlinelibrary.wiley.com/doi/full/10.1111/pbi.13558
PlantKGA_431	Apiales	Araliaceae	Panax	notoginseng	Panax notoginseng		三七	chromosome	Yes	转录本	Pno05G003076t2	Pno05G003076t21288xxPlantKGA_431	Pno05G003076	L	partial	5	169288702	169292033	-	Pfam	PF00560	Leucine Rich Repeat	Leucine-rich repeat	371	392	LHILDLAHNNLSGVIPNSLGNL	0.23	MLKNLKQLRLGHNIFWGSIPATIGSLSFLEELNLSFNKMSGTIPTTLGQLSQLKDLNIEGNPCHGVITEAHLMNLTSLQSLAVNTNTTDKQLVFNVTSEWDPPFRLKYLDLGNCLLGPTFPAWLRVQSKLDHVNLHNAGIKDSIPEEWFLKISSQITDLDLSDNRIKGKLPHKLKSPKVGFIDLRNNHFEGSLPLWSTSAHSFYLQNNLFSGHIPNNIGELMPHLEVLNLSENHLNGMIPSSICALSRLLVLSLRNNQLSGKLPQCWDEMQPPISALDVANNNISGNIPSSLGYLGFLYVLILSNNTLDGEIPPSLQNCSDLKILDLGRNRLSGNLPLWIGKDFTPFWILSLRSNSFNGTIPTQWCNLLTLHILDLAHNNLSGVIPNSLGNLSSLQASS…	611	3332	https://onlinelibrary.wiley.com/doi/full/10.1111/pbi.13558
PlantKGA_431	Apiales	Araliaceae	Panax	notoginseng	Panax notoginseng		三七	chromosome	Yes	转录本	Pno05G003461t1	Pno05G003461t11288xxPlantKGA_431	Pno05G003461	L	partial	5	175555216	175559376	+	Pfam	PF13516	Leucine Rich repeat	Leucine-rich repeat	588	607	LSELDISKCAISDSGIAALA	0.041	MPKVFEYSGNDNFCPGGSIYPNPKESTLFLSLGHHFDVFFPRKKSRISAPFVFSGEILEQKQTSIEVLPDECLFEVFRRLPGGQERSSCACVSKRWLMLLSNIRRDEICPTKLTQSLEPKEKLVSTEAVKSYETNKKSALTGSDVDKVKPLVEDLELEGDGYLSRCLEGKKATDIRLAALAIGTSSRGGLGKLSIRGGNSFCGVTNLGLKAIACGCPSLRALSLWNLSCIGDEGLSEIAGGCHMLEKLDICQCPSISDKALIAVVKNCPNLTSLTIESCSSIGNEALQSVGRFCNNLKSISIKNCPLVGDQGIASLVSSVSTLTKMNLQALNIGDMSLAVIGHYGKALTDLVLIGLQNVTEKGFWVMGNGQGLQALRSLTINSCQGVTDLGLEAVGKGC…	670	4161	https://onlinelibrary.wiley.com/doi/full/10.1111/pbi.13558
PlantKGA_431	Apiales	Araliaceae	Panax	notoginseng	Panax notoginseng		三七	chromosome	Yes	转录本	Pno05G003475t1	Pno05G003475t11288xxPlantKGA_431	Pno05G003475	L	partial	5	175856784	175861697	-	Pfam	PF13855	Leucine rich repeat	Leucine-rich repeat	269	328	SLSILLLRNCGLVGQLSKQLSSFSNLKILDLSFNKLTGQVPESFQDFPSLQYLFLGNNNL	1.2e-08	MGILSLSYFVICLLEIVAAQQSTHPNEVAALKKLIDYWNLSTKLNLTIDPCNPNATWAPENANPRISCDCGSATSCHIKHLKIYALDISGEIPKELFELKELMDLNLGQNILSGPIPPEIGQLSQMQYLSFGINNLTGTVPPELGNLTKLVSLSFSSNNFHGSLPTELGKLTALEQLYIDSSGVSGPIPQQVSNLKLLHTLWASDNLFTGKLPEFFGTLTNLKNLRLQGNNLEGPIPRSYGDLTKLEDLRIGDLSKGDSSLDFLGNFTSLSILLLRNCGLVGQLSKQLSSFSNLKILDLSFNKLTGQVPESFQDFPSLQYLFLGNNNLNGELPANVISPKLVALDVSFNSITGNLPLNFGKVGLTMNVVGTSINANRLHDGKASRMLQCLGDTTKCTNK…	652	4914	https://onlinelibrary.wiley.com/doi/full/10.1111/pbi.13558
PlantKGA_431	Apiales	Araliaceae	Panax	notoginseng	Panax notoginseng		三七	chromosome	Yes	转录本	Pno05G003854t1	Pno05G003854t11288xxPlantKGA_431	Pno05G003854	L	partial	5	182194060	182196294	+	Pfam	PF08263	Leucine rich repeat N-terminal domain	Leucine-rich repeat-containing N-terminal, plant-type	54	86	ALQAWKSAIFSDPFNFTSNWTGPNVCSYGGVFC	0.00015	MTPRPSPPRLRSFFLTIILFSLLFQIVSVVAADDNDDTSKIQFENPRLRQAYIALQAWKSAIFSDPFNFTSNWTGPNVCSYGGVFCAPFPSNPSIRAVAAIDLNHADIAGYLPSELGLLTDLAVFHINSNRFCGTVPPSFKRLKLVYELDLSNNRFAGGFPNVVLSLPSLQFLDLRFNEFEGPVPSKLFDKPLDAIFLNDNRFQFGIPENLGNSPVSVLVFANNNLGGCIPGSIGKMGKTLNEIILMNDNLTGCLPREIGMLKELTVFDVSFNHLQGSLPVTVGSMKSLEQLDVAHNSFTGVIPASICQLPRLQNFTYSFNYFTGEAPVCASGKELLDGSKNCISGKTNQRSSRECSSEEAHPVDCSKSKCSSSGGGGSPSSGGSPPVKSPAPPQKPSG…	744	2235	https://onlinelibrary.wiley.com/doi/full/10.1111/pbi.13558
PlantKGA_431	Apiales	Araliaceae	Panax	notoginseng	Panax notoginseng		三七	chromosome	Yes	转录本	Pno05G004618t1	Pno05G004618t11288xxPlantKGA_431	Pno05G004618	L	partial	5	192466461	192470786	+	Pfam	PF13516	Leucine Rich repeat	Leucine-rich repeat	214	232	LRYLNLSNNALGEKGVRAF	0.2	MDTAALNRSISIKLWPPSQSTRLMLVERMTKNLATPSILSRKYGLLSKEEAEKDATKIEALAYASASQHFEKEPDGDGSSAVQFYAKESSKLMLEVVKRGPKAKEDGEVIIAEKVTASHETVFDISGGRRAFIDADEAEELLKPLRELGSKYTKICFSNRSFGLDAARIAEAFLPSLKDQLSEVDLSDFIAGRPETEALEVMKIFSSVLEGCELRYLNLSNNALGEKGVRAFGSLLKSQRNLEELHLMNDGISEEAARAVCELIPSTEKLRVLQFHNNMTGDEGAIAISELVKHSPLLEDFRCSSTRVDSEGGVALAEALGTCSHLKKLDLRDNMFGVEAGIALSKALPVFSNLIEVYLSYLNLEDEGSIALVNTLKESAPSLEVLEMAGNDITAEAAP…	536	4326	https://onlinelibrary.wiley.com/doi/full/10.1111/pbi.13558
PlantKGA_431	Apiales	Araliaceae	Panax	notoginseng	Panax notoginseng		三七	chromosome	Yes	转录本	Pno05G004618t1	Pno05G004618t11288xxPlantKGA_431	Pno05G004618	L	partial	5	192466461	192470786	+	Pfam	PF13516	Leucine Rich repeat	Leucine-rich repeat	409	430	HSLTKLNMSENELKDEGAILIA	0.0062	MDTAALNRSISIKLWPPSQSTRLMLVERMTKNLATPSILSRKYGLLSKEEAEKDATKIEALAYASASQHFEKEPDGDGSSAVQFYAKESSKLMLEVVKRGPKAKEDGEVIIAEKVTASHETVFDISGGRRAFIDADEAEELLKPLRELGSKYTKICFSNRSFGLDAARIAEAFLPSLKDQLSEVDLSDFIAGRPETEALEVMKIFSSVLEGCELRYLNLSNNALGEKGVRAFGSLLKSQRNLEELHLMNDGISEEAARAVCELIPSTEKLRVLQFHNNMTGDEGAIAISELVKHSPLLEDFRCSSTRVDSEGGVALAEALGTCSHLKKLDLRDNMFGVEAGIALSKALPVFSNLIEVYLSYLNLEDEGSIALVNTLKESAPSLEVLEMAGNDITAEAAP…	536	4326	https://onlinelibrary.wiley.com/doi/full/10.1111/pbi.13558
PlantKGA_431	Apiales	Araliaceae	Panax	notoginseng	Panax notoginseng		三七	chromosome	Yes	转录本	Pno05G004618t1	Pno05G004618t11288xxPlantKGA_431	Pno05G004618	L	partial	5	192466461	192470786	+	Pfam	PF13516	Leucine Rich repeat	Leucine-rich repeat	381	398	PSLEVLEMAGNDITAEAA	1	MDTAALNRSISIKLWPPSQSTRLMLVERMTKNLATPSILSRKYGLLSKEEAEKDATKIEALAYASASQHFEKEPDGDGSSAVQFYAKESSKLMLEVVKRGPKAKEDGEVIIAEKVTASHETVFDISGGRRAFIDADEAEELLKPLRELGSKYTKICFSNRSFGLDAARIAEAFLPSLKDQLSEVDLSDFIAGRPETEALEVMKIFSSVLEGCELRYLNLSNNALGEKGVRAFGSLLKSQRNLEELHLMNDGISEEAARAVCELIPSTEKLRVLQFHNNMTGDEGAIAISELVKHSPLLEDFRCSSTRVDSEGGVALAEALGTCSHLKKLDLRDNMFGVEAGIALSKALPVFSNLIEVYLSYLNLEDEGSIALVNTLKESAPSLEVLEMAGNDITAEAAP…	536	4326	https://onlinelibrary.wiley.com/doi/full/10.1111/pbi.13558
PlantKGA_431	Apiales	Araliaceae	Panax	notoginseng	Panax notoginseng		三七	chromosome	Yes	转录本	Pno05G004618t1	Pno05G004618t11288xxPlantKGA_431	Pno05G004618	L	partial	5	192466461	192470786	+	Pfam	PF13516	Leucine Rich repeat	Leucine-rich repeat	322	345	TCSHLKKLDLRDNMFGVEAGIALS	0.089	MDTAALNRSISIKLWPPSQSTRLMLVERMTKNLATPSILSRKYGLLSKEEAEKDATKIEALAYASASQHFEKEPDGDGSSAVQFYAKESSKLMLEVVKRGPKAKEDGEVIIAEKVTASHETVFDISGGRRAFIDADEAEELLKPLRELGSKYTKICFSNRSFGLDAARIAEAFLPSLKDQLSEVDLSDFIAGRPETEALEVMKIFSSVLEGCELRYLNLSNNALGEKGVRAFGSLLKSQRNLEELHLMNDGISEEAARAVCELIPSTEKLRVLQFHNNMTGDEGAIAISELVKHSPLLEDFRCSSTRVDSEGGVALAEALGTCSHLKKLDLRDNMFGVEAGIALSKALPVFSNLIEVYLSYLNLEDEGSIALVNTLKESAPSLEVLEMAGNDITAEAAP…	536	4326	https://onlinelibrary.wiley.com/doi/full/10.1111/pbi.13558
PlantKGA_431	Apiales	Araliaceae	Panax	notoginseng	Panax notoginseng		三七	chromosome	Yes	转录本	Pno05G004691t1	Pno05G004691t11288xxPlantKGA_431	Pno05G004691	L	partial	5	193222293	193223940	+	Pfam	PF13855	Leucine rich repeat	Leucine-rich repeat	120	179	NLRFLAVSRNFISGPIPATLGQLRGLRTLDLSYNLLTGSIPWSIGSLPALTNVILGHNRL	8e-08	MGIFLCYLFIFLQQSLLPFAMLHPIDFLALQSIRKSLEDMPGSNYFASWDFTADPCNFAGVYCSGDRVIALNLGDPRAGSPGLAGRLAPAIGKLTSLAEFTVVPGRIMGTLPPSLYQLKNLRFLAVSRNFISGPIPATLGQLRGLRTLDLSYNLLTGSIPWSIGSLPALTNVILGHNRLSGSIPRFTSQNLIRLDLKDNQLSGWLLPNSLPPSIRYLSLSWNRLSGPVYRVLARLNRLNYLDLSLNQFTGNIPGCLFTFPLSNLQLQRNLFTGSVQPAAQVRIPSVDLSFNRFSGQISPLFSTVQTLYLNNNRFMGQVPGTFVDRLLDSSIQILYLQHNFLTGMAINPTVKIPVSSSLCLQYNCMVPPVKTPCPLKAGKQKTRPPGQCIEWKG	393	1648	https://onlinelibrary.wiley.com/doi/full/10.1111/pbi.13558
PlantKGA_431	Apiales	Araliaceae	Panax	notoginseng	Panax notoginseng		三七	chromosome	Yes	转录本	Pno05G004691t1	Pno05G004691t11288xxPlantKGA_431	Pno05G004691	L	partial	5	193222293	193223940	+	Pfam	PF08263	Leucine rich repeat N-terminal domain	Leucine-rich repeat-containing N-terminal, plant-type	26	64	DFLALQSIRKSLEDMPGSNYFASWDFTADPCNFAGVYCS	1.3e-07	MGIFLCYLFIFLQQSLLPFAMLHPIDFLALQSIRKSLEDMPGSNYFASWDFTADPCNFAGVYCSGDRVIALNLGDPRAGSPGLAGRLAPAIGKLTSLAEFTVVPGRIMGTLPPSLYQLKNLRFLAVSRNFISGPIPATLGQLRGLRTLDLSYNLLTGSIPWSIGSLPALTNVILGHNRLSGSIPRFTSQNLIRLDLKDNQLSGWLLPNSLPPSIRYLSLSWNRLSGPVYRVLARLNRLNYLDLSLNQFTGNIPGCLFTFPLSNLQLQRNLFTGSVQPAAQVRIPSVDLSFNRFSGQISPLFSTVQTLYLNNNRFMGQVPGTFVDRLLDSSIQILYLQHNFLTGMAINPTVKIPVSSSLCLQYNCMVPPVKTPCPLKAGKQKTRPPGQCIEWKG	393	1648	https://onlinelibrary.wiley.com/doi/full/10.1111/pbi.13558
PlantKGA_431	Apiales	Araliaceae	Panax	notoginseng	Panax notoginseng		三七	chromosome	Yes	转录本	Pno05G005065t1	Pno05G005065t11288xxPlantKGA_431	Pno05G005065	L	partial	5	197611864	197613541	-	Pfam	PF13855	Leucine rich repeat	Leucine-rich repeat	215	274	KLKVLDLSLNGFDGYLPESIGGLENLLKLDLSLNGFSGKIPESLKGLKMLEFLDLSYNRF	2.3e-09	MALSLLSALIFIALSVFHHHLVISQPFLDSAEQESVYRILDSVNSDISWRSLFPDDLCYSAPHGVVCDYFTQPNSTVQTVHVTELSFGYVSDYSPNPPCTYNSTIDPFSLSSLTHLRKLFFYKCFTDRNVSLPDLSSFGSSLEDLVFIENPALVGSLSGNIGRLSSLRRLVMTGTNVSGKIPDGFGDLLNTEQITLSRNGFSGQVSLLNLSKLKKLKVLDLSLNGFDGYLPESIGGLENLLKLDLSLNGFSGKIPESLKGLKMLEFLDLSYNRFANSGVPLFLAEMPRLREVYLSGNFLGGQIPEIWKNLGGIVGIGLSGTGLVGNIPASMGVFLRNVCYLGLDNNQLVGTVPEEFGALELMSELNLENNNLSGRVPFSAKFASKVGKKLKLKGNPDLC…	457	1678	https://onlinelibrary.wiley.com/doi/full/10.1111/pbi.13558
PlantKGA_431	Apiales	Araliaceae	Panax	notoginseng	Panax notoginseng		三七	chromosome	Yes	转录本	Pno05G005142t1	Pno05G005142t11288xxPlantKGA_431	Pno05G005142	L	partial	5	198501938	198567226	+	Pfam	PF00560	Leucine Rich Repeat	Leucine-rich repeat	818	837	KLKHLDLTGNVLCGQPPSLS	0.25	MLFVSLVVTSTIAPKAEAGARAFFVFGDSLVDNGNNNYLLTTARADSPPYGIDLPSHSPTGRFSNGYNIPDLISQQLGAPTTLPYLSSELDGDNLLIGANFASAGVGILNDTGFQFVNIIRIGQQLRYFEEYQQRLIALIGAQQAQQLVNKALVLITLGGNDFVNNYFLTPVTLRRIQFNLPDYTTFLISEYKKILQRLYKLGARRVLVTGTGPLGCVPAELALRSIDGKCAEEPQKAAALYNPKLVQMIQALNKELTTDCFVAVNALELQNDFISNPQAFARDHRSISPLPSLDPATLLLPERNCEAKGPLNHRDEHEVASRNQRKRKRCENFERAWRRLYKSHNPGVVREIEPMYCVGNYEFENDWQQMYWEIHLQRCLAAAAEKAVLPYFEGCLGE…	866	65289	https://onlinelibrary.wiley.com/doi/full/10.1111/pbi.13558
PlantKGA_431	Apiales	Araliaceae	Panax	notoginseng	Panax notoginseng		三七	chromosome	Yes	转录本	Pno05G005142t1	Pno05G005142t11288xxPlantKGA_431	Pno05G005142	L	partial	5	198501938	198567226	+	Pfam	PF13516	Leucine Rich repeat	Leucine-rich repeat	644	665	MPNLVNLDLSDNPIEDDGIKSL	0.016	MLFVSLVVTSTIAPKAEAGARAFFVFGDSLVDNGNNNYLLTTARADSPPYGIDLPSHSPTGRFSNGYNIPDLISQQLGAPTTLPYLSSELDGDNLLIGANFASAGVGILNDTGFQFVNIIRIGQQLRYFEEYQQRLIALIGAQQAQQLVNKALVLITLGGNDFVNNYFLTPVTLRRIQFNLPDYTTFLISEYKKILQRLYKLGARRVLVTGTGPLGCVPAELALRSIDGKCAEEPQKAAALYNPKLVQMIQALNKELTTDCFVAVNALELQNDFISNPQAFARDHRSISPLPSLDPATLLLPERNCEAKGPLNHRDEHEVASRNQRKRKRCENFERAWRRLYKSHNPGVVREIEPMYCVGNYEFENDWQQMYWEIHLQRCLAAAAEKAVLPYFEGCLGE…	866	65289	https://onlinelibrary.wiley.com/doi/full/10.1111/pbi.13558
PlantKGA_431	Apiales	Araliaceae	Panax	notoginseng	Panax notoginseng		三七	chromosome	Yes	转录本	Pno05G005837t1	Pno05G005837t11288xxPlantKGA_431	Pno05G005837	L	partial	5	245122	249454	+	Pfam	PF13855	Leucine rich repeat	Leucine-rich repeat	383	441	TYLDLSHNKLHGAVPSTHFEGLDNLVNVDLQSNDFRGTIPSTLFALPSLRKIQLSHNHF	3e-07	MKIRLFSWLFLIPLFQILLGIDILLVSGQCLDNQKSLLLQLKNGLTFESSFSTKLVWWNQSTDCCNWRGVTCNKSTGQVIGLDLNSESISGVNNSSVTVFSLQFLQRLNLAYNSFNSTEIPSGLFNLTSLTYLNLSNSGFAGQIPNGFSRMTRLVTLDLSTLFLLGNSSLKLENPNLTMFFQNLTELTELYLDGVNISAHIYDWCQAISSSLHNLQVLSLSNCYISGPIDSSLAKLQFLSVIRLSQNNLNAPVPEFFANFKHLTALHLSSCNLSGTFPERILKVPTLKTLDLSNNKLLEGSLPEFPENGSLQTLVLSLTKFSGPLPDSLGDLGLLSRMELSSCNFSGKIPNSMANCTQLVYLDFSINNFSGPIPSFQKSKNFTYLDLSHNKLHGAVPST…	1127	4333	https://onlinelibrary.wiley.com/doi/full/10.1111/pbi.13558
PlantKGA_431	Apiales	Araliaceae	Panax	notoginseng	Panax notoginseng		三七	chromosome	Yes	转录本	Pno05G005837t1	Pno05G005837t11288xxPlantKGA_431	Pno05G005837	L	partial	5	245122	249454	+	Pfam	PF13516	Leucine Rich repeat	Leucine-rich repeat	552	567	SKLNYLDLSDNQIGGE	0.11	MKIRLFSWLFLIPLFQILLGIDILLVSGQCLDNQKSLLLQLKNGLTFESSFSTKLVWWNQSTDCCNWRGVTCNKSTGQVIGLDLNSESISGVNNSSVTVFSLQFLQRLNLAYNSFNSTEIPSGLFNLTSLTYLNLSNSGFAGQIPNGFSRMTRLVTLDLSTLFLLGNSSLKLENPNLTMFFQNLTELTELYLDGVNISAHIYDWCQAISSSLHNLQVLSLSNCYISGPIDSSLAKLQFLSVIRLSQNNLNAPVPEFFANFKHLTALHLSSCNLSGTFPERILKVPTLKTLDLSNNKLLEGSLPEFPENGSLQTLVLSLTKFSGPLPDSLGDLGLLSRMELSSCNFSGKIPNSMANCTQLVYLDFSINNFSGPIPSFQKSKNFTYLDLSHNKLHGAVPST…	1127	4333	https://onlinelibrary.wiley.com/doi/full/10.1111/pbi.13558
PlantKGA_431	Apiales	Araliaceae	Panax	notoginseng	Panax notoginseng		三七	chromosome	Yes	转录本	Pno05G005837t1	Pno05G005837t11288xxPlantKGA_431	Pno05G005837	L	partial	5	245122	249454	+	Pfam	PF13516	Leucine Rich repeat	Leucine-rich repeat	504	516	NLTSLDLSYNNLS	1.5	MKIRLFSWLFLIPLFQILLGIDILLVSGQCLDNQKSLLLQLKNGLTFESSFSTKLVWWNQSTDCCNWRGVTCNKSTGQVIGLDLNSESISGVNNSSVTVFSLQFLQRLNLAYNSFNSTEIPSGLFNLTSLTYLNLSNSGFAGQIPNGFSRMTRLVTLDLSTLFLLGNSSLKLENPNLTMFFQNLTELTELYLDGVNISAHIYDWCQAISSSLHNLQVLSLSNCYISGPIDSSLAKLQFLSVIRLSQNNLNAPVPEFFANFKHLTALHLSSCNLSGTFPERILKVPTLKTLDLSNNKLLEGSLPEFPENGSLQTLVLSLTKFSGPLPDSLGDLGLLSRMELSSCNFSGKIPNSMANCTQLVYLDFSINNFSGPIPSFQKSKNFTYLDLSHNKLHGAVPST…	1127	4333	https://onlinelibrary.wiley.com/doi/full/10.1111/pbi.13558
PlantKGA_431	Apiales	Araliaceae	Panax	notoginseng	Panax notoginseng		三七	chromosome	Yes	转录本	Pno05G005837t1	Pno05G005837t11288xxPlantKGA_431	Pno05G005837	L	partial	5	245122	249454	+	Pfam	PF08263	Leucine rich repeat N-terminal domain	Leucine-rich repeat-containing N-terminal, plant-type	32	73	DNQKSLLLQLKNGLTFESSFSTKLVWWNQSTDCCNWRGVTCN	1.9e-09	MKIRLFSWLFLIPLFQILLGIDILLVSGQCLDNQKSLLLQLKNGLTFESSFSTKLVWWNQSTDCCNWRGVTCNKSTGQVIGLDLNSESISGVNNSSVTVFSLQFLQRLNLAYNSFNSTEIPSGLFNLTSLTYLNLSNSGFAGQIPNGFSRMTRLVTLDLSTLFLLGNSSLKLENPNLTMFFQNLTELTELYLDGVNISAHIYDWCQAISSSLHNLQVLSLSNCYISGPIDSSLAKLQFLSVIRLSQNNLNAPVPEFFANFKHLTALHLSSCNLSGTFPERILKVPTLKTLDLSNNKLLEGSLPEFPENGSLQTLVLSLTKFSGPLPDSLGDLGLLSRMELSSCNFSGKIPNSMANCTQLVYLDFSINNFSGPIPSFQKSKNFTYLDLSHNKLHGAVPST…	1127	4333	https://onlinelibrary.wiley.com/doi/full/10.1111/pbi.13558
PlantKGA_431	Apiales	Araliaceae	Panax	notoginseng	Panax notoginseng		三七	chromosome	Yes	转录本	Pno05G007255t1	Pno05G007255t11288xxPlantKGA_431	Pno05G007255	L	partial	5	3325637	3327883	+	Pfam	PF08263	Leucine rich repeat N-terminal domain	Leucine-rich repeat-containing N-terminal, plant-type	47	79	ALQAWKSAIFSDPFNFTSNWSGPNVCSYGGVFC	8e-05	MPPPRLRSFFLTIILFSLLFQIVSVVAADDISKIQFENPRLRQAYIALQAWKSAIFSDPFNFTSNWSGPNVCSYGGVFCAPFPSNPSIRAVAAIDLNHADIAGYLPSELGLLTDLAVFHINSNRFCGTVPPSFKRLKLLYELDLSNNRFVGGFPNVVLSLPSLQFLDLRFNEFEGPVPSKLFDKPLDAIFLNDNRFQFGIPENLGNSPVSVLVFANNNLGGCIPGSIGKMGKTLNEIILMNDNLTGCLPHEIGLLKELTVFDVSFNHLQGSLPVTVESMKSLEQLDVAHNSFTGVIPASICKLPRLQNFTYSFNYFTGEAPICASPRGKELLDGSKNCIPGKTNQRSSRECSSEEAHPVDCSKSKCSSSGSGGSPGSGGSPPVKSPAPPQKPSGRTPPA…	748	2247	https://onlinelibrary.wiley.com/doi/full/10.1111/pbi.13558
PlantKGA_431	Apiales	Araliaceae	Panax	notoginseng	Panax notoginseng		三七	chromosome	Yes	转录本	Pno05G007255t1	Pno05G007255t11288xxPlantKGA_431	Pno05G007255	L	partial	5	3325637	3327883	+	Pfam	PF13855	Leucine rich repeat	Leucine-rich repeat	115	172	LAVFHINSNRFCGTVPPSFKRLKLLYELDLSNNRFVGGFPNVVLSLPSLQFLDLRFNE	9.1e-07	MPPPRLRSFFLTIILFSLLFQIVSVVAADDISKIQFENPRLRQAYIALQAWKSAIFSDPFNFTSNWSGPNVCSYGGVFCAPFPSNPSIRAVAAIDLNHADIAGYLPSELGLLTDLAVFHINSNRFCGTVPPSFKRLKLLYELDLSNNRFVGGFPNVVLSLPSLQFLDLRFNEFEGPVPSKLFDKPLDAIFLNDNRFQFGIPENLGNSPVSVLVFANNNLGGCIPGSIGKMGKTLNEIILMNDNLTGCLPHEIGLLKELTVFDVSFNHLQGSLPVTVESMKSLEQLDVAHNSFTGVIPASICKLPRLQNFTYSFNYFTGEAPICASPRGKELLDGSKNCIPGKTNQRSSRECSSEEAHPVDCSKSKCSSSGSGGSPGSGGSPPVKSPAPPQKPSGRTPPA…	748	2247	https://onlinelibrary.wiley.com/doi/full/10.1111/pbi.13558
PlantKGA_431	Apiales	Araliaceae	Panax	notoginseng	Panax notoginseng		三七	chromosome	Yes	转录本	Pno05G007255t1	Pno05G007255t11288xxPlantKGA_431	Pno05G007255	L	partial	5	3325637	3327883	+	Pfam	PF00560	Leucine Rich Repeat	Leucine-rich repeat	281	303	SLEQLDVAHNSFTGVIPASICKL	1.3	MPPPRLRSFFLTIILFSLLFQIVSVVAADDISKIQFENPRLRQAYIALQAWKSAIFSDPFNFTSNWSGPNVCSYGGVFCAPFPSNPSIRAVAAIDLNHADIAGYLPSELGLLTDLAVFHINSNRFCGTVPPSFKRLKLLYELDLSNNRFVGGFPNVVLSLPSLQFLDLRFNEFEGPVPSKLFDKPLDAIFLNDNRFQFGIPENLGNSPVSVLVFANNNLGGCIPGSIGKMGKTLNEIILMNDNLTGCLPHEIGLLKELTVFDVSFNHLQGSLPVTVESMKSLEQLDVAHNSFTGVIPASICKLPRLQNFTYSFNYFTGEAPICASPRGKELLDGSKNCIPGKTNQRSSRECSSEEAHPVDCSKSKCSSSGSGGSPGSGGSPPVKSPAPPQKPSGRTPPA…	748	2247	https://onlinelibrary.wiley.com/doi/full/10.1111/pbi.13558
PlantKGA_431	Apiales	Araliaceae	Panax	notoginseng	Panax notoginseng		三七	chromosome	Yes	转录本	Pno05G014449t1	Pno05G014449t11288xxPlantKGA_431	Pno05G014449	L	partial	5	735051	739630	-	Pfam	PF13516	Leucine Rich repeat	Leucine-rich repeat	457	480	CSKLTELDLYRCAGITDLGILAIS	0.22	MKKQKQKTASTISLFDLLSEETIFLILDCLNDNPFDTKSFSHVCKSFYNIESLHRKTLKPFPSEHLPKILNRYPFVSNLDFSLCPRITDDSLKSMSVICSKMLKSINLSRSKFFSHVGLSNLVMNCSNLVEIDLSNAEDLRDPAMAALAEAKNLERLCLARCKSITDMGIGCIAVGCRKLRLIGLKWCLGVGDLGVGLIAVKCKEICSLDLSYLPITKTCLPQILELQNLEHLVLEGCFGIDDDSLAALKHGFNTLETLNISNCKNVSHVGLSSLTYEAGSLRQLIFTYGSPVTLALASSLQKLFTLQSVKLDGSQVTCSGLKAIGSWCVSLKELSLSKCMGVTDEGLSSLVKTHKDLRKLDITCCRKITHISIAYITHSCTSLASFRMESCTLVPRES…	665	4580	https://onlinelibrary.wiley.com/doi/full/10.1111/pbi.13558
PlantKGA_431	Apiales	Araliaceae	Panax	notoginseng	Panax notoginseng		三七	chromosome	Yes	转录本	Pno05G014449t1	Pno05G014449t11288xxPlantKGA_431	Pno05G014449	L	partial	5	735051	739630	-	Pfam	PF13516	Leucine Rich repeat	Leucine-rich repeat	407	429	CHYLEELDLTDNEVDDEGLKSIS	2.4e-05	MKKQKQKTASTISLFDLLSEETIFLILDCLNDNPFDTKSFSHVCKSFYNIESLHRKTLKPFPSEHLPKILNRYPFVSNLDFSLCPRITDDSLKSMSVICSKMLKSINLSRSKFFSHVGLSNLVMNCSNLVEIDLSNAEDLRDPAMAALAEAKNLERLCLARCKSITDMGIGCIAVGCRKLRLIGLKWCLGVGDLGVGLIAVKCKEICSLDLSYLPITKTCLPQILELQNLEHLVLEGCFGIDDDSLAALKHGFNTLETLNISNCKNVSHVGLSSLTYEAGSLRQLIFTYGSPVTLALASSLQKLFTLQSVKLDGSQVTCSGLKAIGSWCVSLKELSLSKCMGVTDEGLSSLVKTHKDLRKLDITCCRKITHISIAYITHSCTSLASFRMESCTLVPRES…	665	4580	https://onlinelibrary.wiley.com/doi/full/10.1111/pbi.13558
PlantKGA_431	Apiales	Araliaceae	Panax	notoginseng	Panax notoginseng		三七	chromosome	Yes	转录本	Pno05G014449t1	Pno05G014449t11288xxPlantKGA_431	Pno05G014449	L	partial	5	735051	739630	-	Pfam	PF13516	Leucine Rich repeat	Leucine-rich repeat	331	351	SLKELSLSKCMGVTDEGLSSL	0.27	MKKQKQKTASTISLFDLLSEETIFLILDCLNDNPFDTKSFSHVCKSFYNIESLHRKTLKPFPSEHLPKILNRYPFVSNLDFSLCPRITDDSLKSMSVICSKMLKSINLSRSKFFSHVGLSNLVMNCSNLVEIDLSNAEDLRDPAMAALAEAKNLERLCLARCKSITDMGIGCIAVGCRKLRLIGLKWCLGVGDLGVGLIAVKCKEICSLDLSYLPITKTCLPQILELQNLEHLVLEGCFGIDDDSLAALKHGFNTLETLNISNCKNVSHVGLSSLTYEAGSLRQLIFTYGSPVTLALASSLQKLFTLQSVKLDGSQVTCSGLKAIGSWCVSLKELSLSKCMGVTDEGLSSLVKTHKDLRKLDITCCRKITHISIAYITHSCTSLASFRMESCTLVPRES…	665	4580	https://onlinelibrary.wiley.com/doi/full/10.1111/pbi.13558
PlantKGA_431	Apiales	Araliaceae	Panax	notoginseng	Panax notoginseng		三七	chromosome	Yes	转录本	Pno05G014449t1	Pno05G014449t11288xxPlantKGA_431	Pno05G014449	L	partial	5	735051	739630	-	Pfam	PF13516	Leucine Rich repeat	Leucine-rich repeat	536	557	QLTKLDIKKCSNINDAGMIPLA	0.41	MKKQKQKTASTISLFDLLSEETIFLILDCLNDNPFDTKSFSHVCKSFYNIESLHRKTLKPFPSEHLPKILNRYPFVSNLDFSLCPRITDDSLKSMSVICSKMLKSINLSRSKFFSHVGLSNLVMNCSNLVEIDLSNAEDLRDPAMAALAEAKNLERLCLARCKSITDMGIGCIAVGCRKLRLIGLKWCLGVGDLGVGLIAVKCKEICSLDLSYLPITKTCLPQILELQNLEHLVLEGCFGIDDDSLAALKHGFNTLETLNISNCKNVSHVGLSSLTYEAGSLRQLIFTYGSPVTLALASSLQKLFTLQSVKLDGSQVTCSGLKAIGSWCVSLKELSLSKCMGVTDEGLSSLVKTHKDLRKLDITCCRKITHISIAYITHSCTSLASFRMESCTLVPRES…	665	4580	https://onlinelibrary.wiley.com/doi/full/10.1111/pbi.13558
PlantKGA_431	Apiales	Araliaceae	Panax	notoginseng	Panax notoginseng		三七	chromosome	Yes	转录本	Pno05G014449t1	Pno05G014449t11288xxPlantKGA_431	Pno05G014449	L	partial	5	735051	739630	-	Pfam	PF13516	Leucine Rich repeat	Leucine-rich repeat	560	582	SHNLRQINLSYSSVTDVGLLSLA	1.1	MKKQKQKTASTISLFDLLSEETIFLILDCLNDNPFDTKSFSHVCKSFYNIESLHRKTLKPFPSEHLPKILNRYPFVSNLDFSLCPRITDDSLKSMSVICSKMLKSINLSRSKFFSHVGLSNLVMNCSNLVEIDLSNAEDLRDPAMAALAEAKNLERLCLARCKSITDMGIGCIAVGCRKLRLIGLKWCLGVGDLGVGLIAVKCKEICSLDLSYLPITKTCLPQILELQNLEHLVLEGCFGIDDDSLAALKHGFNTLETLNISNCKNVSHVGLSSLTYEAGSLRQLIFTYGSPVTLALASSLQKLFTLQSVKLDGSQVTCSGLKAIGSWCVSLKELSLSKCMGVTDEGLSSLVKTHKDLRKLDITCCRKITHISIAYITHSCTSLASFRMESCTLVPRES…	665	4580	https://onlinelibrary.wiley.com/doi/full/10.1111/pbi.13558
PlantKGA_431	Apiales	Araliaceae	Panax	notoginseng	Panax notoginseng		三七	chromosome	Yes	转录本	Pno06G000015t1	Pno06G000015t11288xxPlantKGA_431	Pno06G000015	L	partial	6	10040388	10043710	-	Pfam	PF13855	Leucine rich repeat	Leucine-rich repeat	335	395	KLTYLALADNSLTGALPLSFSNLTKISDLRLSNNSLSGELSPHFITNWTELTSLQLQYNQF	8.8e-07	MAAFQKPFVLLFYVLVLPLNITSSARTEAEALVKWKKSLASSSSLNSWSLTNLTNLCEWTGIICNNAGTVSEINLPYEDLTGTLSHFSFTSFPTLTRFNISNNNFSGPIPSITGSVSKITFLDFSSNYFEDSIPPEIGNLADLHYLSFFDNQLEGTIPYQVSNLQKLHYLDLGSNYLRTPDWSKFLDMPLLTRLSFFYNELTMKFPDFILRCRNLTYLDLSSNKISGPIPESVFTNLGNLEYLNLTHNSFQGPLPTNISKLSKLKDLRLGMNGFSGFIPDDVGLLPDLQILELFNNLFEGNIPSSIGQLRELQQLDLRINHLRSSIPSELGLCTKLTYLALADNSLTGALPLSFSNLTKISDLRLSNNSLSGELSPHFITNWTELTSLQLQYNQFTGYI…	1083	3323	https://onlinelibrary.wiley.com/doi/full/10.1111/pbi.13558
PlantKGA_431	Apiales	Araliaceae	Panax	notoginseng	Panax notoginseng		三七	chromosome	Yes	转录本	Pno06G000015t1	Pno06G000015t11288xxPlantKGA_431	Pno06G000015	L	partial	6	10040388	10043710	-	Pfam	PF13855	Leucine rich repeat	Leucine-rich repeat	747	805	LYQFRVHGNNFTGPLPTCLKNCLGLRILDLGNNNISDTFPQWLETLPELRVLVLRSNKF	9.5e-08	MAAFQKPFVLLFYVLVLPLNITSSARTEAEALVKWKKSLASSSSLNSWSLTNLTNLCEWTGIICNNAGTVSEINLPYEDLTGTLSHFSFTSFPTLTRFNISNNNFSGPIPSITGSVSKITFLDFSSNYFEDSIPPEIGNLADLHYLSFFDNQLEGTIPYQVSNLQKLHYLDLGSNYLRTPDWSKFLDMPLLTRLSFFYNELTMKFPDFILRCRNLTYLDLSSNKISGPIPESVFTNLGNLEYLNLTHNSFQGPLPTNISKLSKLKDLRLGMNGFSGFIPDDVGLLPDLQILELFNNLFEGNIPSSIGQLRELQQLDLRINHLRSSIPSELGLCTKLTYLALADNSLTGALPLSFSNLTKISDLRLSNNSLSGELSPHFITNWTELTSLQLQYNQFTGYI…	1083	3323	https://onlinelibrary.wiley.com/doi/full/10.1111/pbi.13558
PlantKGA_431	Apiales	Araliaceae	Panax	notoginseng	Panax notoginseng		三七	chromosome	Yes	转录本	Pno06G000015t1	Pno06G000015t11288xxPlantKGA_431	Pno06G000015	L	partial	6	10040388	10043710	-	Pfam	PF13855	Leucine rich repeat	Leucine-rich repeat	213	272	RNLTYLDLSSNKISGPIPESVFTNLGNLEYLNLTHNSFQGPLPTNISKLSKLKDLRLGMN	1.9e-08	MAAFQKPFVLLFYVLVLPLNITSSARTEAEALVKWKKSLASSSSLNSWSLTNLTNLCEWTGIICNNAGTVSEINLPYEDLTGTLSHFSFTSFPTLTRFNISNNNFSGPIPSITGSVSKITFLDFSSNYFEDSIPPEIGNLADLHYLSFFDNQLEGTIPYQVSNLQKLHYLDLGSNYLRTPDWSKFLDMPLLTRLSFFYNELTMKFPDFILRCRNLTYLDLSSNKISGPIPESVFTNLGNLEYLNLTHNSFQGPLPTNISKLSKLKDLRLGMNGFSGFIPDDVGLLPDLQILELFNNLFEGNIPSSIGQLRELQQLDLRINHLRSSIPSELGLCTKLTYLALADNSLTGALPLSFSNLTKISDLRLSNNSLSGELSPHFITNWTELTSLQLQYNQFTGYI…	1083	3323	https://onlinelibrary.wiley.com/doi/full/10.1111/pbi.13558
PlantKGA_431	Apiales	Araliaceae	Panax	notoginseng	Panax notoginseng		三七	chromosome	Yes	转录本	Pno06G000015t1	Pno06G000015t11288xxPlantKGA_431	Pno06G000015	L	partial	6	10040388	10043710	-	Pfam	PF08263	Leucine rich repeat N-terminal domain	Leucine-rich repeat-containing N-terminal, plant-type	27	65	TEAEALVKWKKSLASSSSLNSWSLTNLTNLCEWTGIICN	4.2e-07	MAAFQKPFVLLFYVLVLPLNITSSARTEAEALVKWKKSLASSSSLNSWSLTNLTNLCEWTGIICNNAGTVSEINLPYEDLTGTLSHFSFTSFPTLTRFNISNNNFSGPIPSITGSVSKITFLDFSSNYFEDSIPPEIGNLADLHYLSFFDNQLEGTIPYQVSNLQKLHYLDLGSNYLRTPDWSKFLDMPLLTRLSFFYNELTMKFPDFILRCRNLTYLDLSSNKISGPIPESVFTNLGNLEYLNLTHNSFQGPLPTNISKLSKLKDLRLGMNGFSGFIPDDVGLLPDLQILELFNNLFEGNIPSSIGQLRELQQLDLRINHLRSSIPSELGLCTKLTYLALADNSLTGALPLSFSNLTKISDLRLSNNSLSGELSPHFITNWTELTSLQLQYNQFTGYI…	1083	3323	https://onlinelibrary.wiley.com/doi/full/10.1111/pbi.13558
PlantKGA_431	Apiales	Araliaceae	Panax	notoginseng	Panax notoginseng		三七	chromosome	Yes	转录本	Pno06G000015t1	Pno06G000015t11288xxPlantKGA_431	Pno06G000015	L	partial	6	10040388	10043710	-	Pfam	PF00560	Leucine Rich Repeat	Leucine-rich repeat	903	924	SLRFLNLSQNILTGGIPSSLGN	0.15	MAAFQKPFVLLFYVLVLPLNITSSARTEAEALVKWKKSLASSSSLNSWSLTNLTNLCEWTGIICNNAGTVSEINLPYEDLTGTLSHFSFTSFPTLTRFNISNNNFSGPIPSITGSVSKITFLDFSSNYFEDSIPPEIGNLADLHYLSFFDNQLEGTIPYQVSNLQKLHYLDLGSNYLRTPDWSKFLDMPLLTRLSFFYNELTMKFPDFILRCRNLTYLDLSSNKISGPIPESVFTNLGNLEYLNLTHNSFQGPLPTNISKLSKLKDLRLGMNGFSGFIPDDVGLLPDLQILELFNNLFEGNIPSSIGQLRELQQLDLRINHLRSSIPSELGLCTKLTYLALADNSLTGALPLSFSNLTKISDLRLSNNSLSGELSPHFITNWTELTSLQLQYNQFTGYI…	1083	3323	https://onlinelibrary.wiley.com/doi/full/10.1111/pbi.13558
PlantKGA_431	Apiales	Araliaceae	Panax	notoginseng	Panax notoginseng		三七	chromosome	Yes	转录本	Pno06G000642t1	Pno06G000642t11288xxPlantKGA_431	Pno06G000642	L	partial	6	116136615	116143171	-	Pfam	PF13516	Leucine Rich repeat	Leucine-rich repeat	84	99	PNLKTLDLAQNQLTSE	0.74	MSTSGLMTPSIKVCPTSSTMAAPVRSGTSPNVLSALKSLSRDLSDNLLYGDIPFSISKLKQLELLNLKNNQLTGPILSTLTQIPNLKTLDLAQNQLTSEMPRLIYWNEVLQYFDVRRNNLTGPIPNNIGNCTSFEILFLQVNKLTGKIPEVIGLMQALAVLYLHGNKLTGPIPPELRNMSKLSYLQLNDNQLVGGIPAELGKLEQLFELNLANNNLEGPIPQNISSCTALNQFNVHGNRLNVSIPLSFHNLESLTYLNLSSNEFKGGIPIELGRIINPDTLDVSNNDFSGHVPNSIGDLEHLLTLNLSCNHLNGPVPVEFGNLRSILIIDPSEADTFDPSISGVGPSGGLYFDGLTDAYPPLCWPDIPSGRDLVTLEELHQMDILDDVDIIDFF	394	6557	https://onlinelibrary.wiley.com/doi/full/10.1111/pbi.13558
PlantKGA_431	Apiales	Araliaceae	Panax	notoginseng	Panax notoginseng		三七	chromosome	Yes	转录本	Pno06G000642t1	Pno06G000642t11288xxPlantKGA_431	Pno06G000642	L	partial	6	116136615	116143171	-	Pfam	PF13516	Leucine Rich repeat	Leucine-rich repeat	301	314	HLLTLNLSCNHLNG	1.1	MSTSGLMTPSIKVCPTSSTMAAPVRSGTSPNVLSALKSLSRDLSDNLLYGDIPFSISKLKQLELLNLKNNQLTGPILSTLTQIPNLKTLDLAQNQLTSEMPRLIYWNEVLQYFDVRRNNLTGPIPNNIGNCTSFEILFLQVNKLTGKIPEVIGLMQALAVLYLHGNKLTGPIPPELRNMSKLSYLQLNDNQLVGGIPAELGKLEQLFELNLANNNLEGPIPQNISSCTALNQFNVHGNRLNVSIPLSFHNLESLTYLNLSSNEFKGGIPIELGRIINPDTLDVSNNDFSGHVPNSIGDLEHLLTLNLSCNHLNGPVPVEFGNLRSILIIDPSEADTFDPSISGVGPSGGLYFDGLTDAYPPLCWPDIPSGRDLVTLEELHQMDILDDVDIIDFF	394	6557	https://onlinelibrary.wiley.com/doi/full/10.1111/pbi.13558
PlantKGA_431	Apiales	Araliaceae	Panax	notoginseng	Panax notoginseng		三七	chromosome	Yes	转录本	Pno06G001246t1	Pno06G001246t11288xxPlantKGA_431	Pno06G001246	L	partial	6	131238849	131242129	-	Pfam	PF00560	Leucine Rich Repeat	Leucine-rich repeat	61	83	NLKTLDVRRNNLTAPIPNSISNC	0.021	MSTSGLKTPFIRVYPTSSTMAAPIKSGTSPSVISALKSISRNLKNNQLTGPIPSTLTQIPNLKTLDVRRNNLTAPIPNSISNCTSFEILDISYNGISGEISYNIGFLQAATLTLQVNKLTGKIPEVISLMKALAVLDLSENELIELISLILGNLSYTGKLYLHGNKLTGPIPPELGNMLKLSYLQLNGNQLVGGILAELGKLEQLFELNLANNNLEGPIPLNISSGTALNQFNVHGNRLNGSIPLSFRNLESLTYLDLSNNDISGHVPTSIGDLEHLLTLNLSCNHLNGPVPVEFGNLRSILIIILNNNNLDGEIPDQLTKCLSLNTM	328	3281	https://onlinelibrary.wiley.com/doi/full/10.1111/pbi.13558
PlantKGA_431	Apiales	Araliaceae	Panax	notoginseng	Panax notoginseng		三七	chromosome	Yes	转录本	Pno06G001246t1	Pno06G001246t11288xxPlantKGA_431	Pno06G001246	L	partial	6	131238849	131242129	-	Pfam	PF13855	Leucine rich repeat	Leucine-rich repeat	229	287	LNQFNVHGNRLNGSIPLSFRNLESLTYLDLSNNDISGHVPTSIGDLEHLLTLNLSCNHL	2.8e-07	MSTSGLKTPFIRVYPTSSTMAAPIKSGTSPSVISALKSISRNLKNNQLTGPIPSTLTQIPNLKTLDVRRNNLTAPIPNSISNCTSFEILDISYNGISGEISYNIGFLQAATLTLQVNKLTGKIPEVISLMKALAVLDLSENELIELISLILGNLSYTGKLYLHGNKLTGPIPPELGNMLKLSYLQLNGNQLVGGILAELGKLEQLFELNLANNNLEGPIPLNISSGTALNQFNVHGNRLNGSIPLSFRNLESLTYLDLSNNDISGHVPTSIGDLEHLLTLNLSCNHLNGPVPVEFGNLRSILIIILNNNNLDGEIPDQLTKCLSLNTM	328	3281	https://onlinelibrary.wiley.com/doi/full/10.1111/pbi.13558
PlantKGA_431	Apiales	Araliaceae	Panax	notoginseng	Panax notoginseng		三七	chromosome	Yes	转录本	Pno06G001754t1	Pno06G001754t11288xxPlantKGA_431	Pno06G001754	L	partial	6	145606955	145607872	-	Pfam	PF00560	Leucine Rich Repeat	Leucine-rich repeat	139	161	NLVLLNLSSNSFEGTIPSNFGNL	0.85	MQLICLILLLLVELAIGKSDLVALLELKNGIEKDPSGKVLSSWDSKSLAPEGCPLDWYGINCSNGRVTSIILNDIGLVGHFNFSAIFGLNMLRNLSISNNQFMGALKGGVALMESLEYLNLSCNLFLGSVPTQLINLKNLVLLNLSSNSFEGTIPSNFGNLEKLKYLDLQSNNFSGEVMIFLSQLGSVAYVDLSSNWFSGSLDLGLGSSSFVSAIQYLNISHNNLSGELFSHDGMPYFDSLEVFDASNNHFVGNIPSFNFVVSLRILRLGSNFLSGSLLEALLQESSMILSELDLSLNLLEGMPF	305	918	https://onlinelibrary.wiley.com/doi/full/10.1111/pbi.13558
PlantKGA_431	Apiales	Araliaceae	Panax	notoginseng	Panax notoginseng		三七	chromosome	Yes	转录本	Pno06G001754t1	Pno06G001754t11288xxPlantKGA_431	Pno06G001754	L	partial	6	145606955	145607872	-	Pfam	PF08263	Leucine rich repeat N-terminal domain	Leucine-rich repeat-containing N-terminal, plant-type	19	63	SDLVALLELKNGIEKDPSGKVLSSWDSKSLAPEGCPLDWYGINCS	5.1e-08	MQLICLILLLLVELAIGKSDLVALLELKNGIEKDPSGKVLSSWDSKSLAPEGCPLDWYGINCSNGRVTSIILNDIGLVGHFNFSAIFGLNMLRNLSISNNQFMGALKGGVALMESLEYLNLSCNLFLGSVPTQLINLKNLVLLNLSSNSFEGTIPSNFGNLEKLKYLDLQSNNFSGEVMIFLSQLGSVAYVDLSSNWFSGSLDLGLGSSSFVSAIQYLNISHNNLSGELFSHDGMPYFDSLEVFDASNNHFVGNIPSFNFVVSLRILRLGSNFLSGSLLEALLQESSMILSELDLSLNLLEGMPF	305	918	https://onlinelibrary.wiley.com/doi/full/10.1111/pbi.13558
PlantKGA_431	Apiales	Araliaceae	Panax	notoginseng	Panax notoginseng		三七	chromosome	Yes	转录本	Pno06G002250t1	Pno06G002250t11288xxPlantKGA_431	Pno06G002250	L	partial	6	158153857	158169177	+	Pfam	PF08263	Leucine rich repeat N-terminal domain	Leucine-rich repeat-containing N-terminal, plant-type	26	62	GDVAVLVSLKNQWQNTPPSWDQSDDPCGDSWEGVTCD	1.8e-07	MAAIPLLFFLVFLAFIHGISSVTDPGDVAVLVSLKNQWQNTPPSWDQSDDPCGDSWEGVTCDNSRVIGLSLSTIGLVGGLSGDIGGLSKLNSLDLSYNKGLTGSLSPRFGDLKILNVLILAGCGFTGTIPTELGNLSEISFIALNSNNFTGEIPPSLGNLSKLYWLDLADNQLTGSIPVSTLTTPGLDLLKKAKHFHFNKNQLSGQIPAKLFSSDMVLIHALFDENQLTGMIPSTIGLVQTLEVLRLDRNAFTDIVPTSLTNLTNIIELNLAHNNFSGPLPDLAGMNSLNYVDLSNNSFNPSEAPEWFSTLQSLTTLVIEYGSLQGPVPQQLFGFPQLQQVKLRNNGFNDTLDMGSSISQQLQLVDLQNNQISTVVLRSGFNNTLLLNGNPACDKAVNS…	545	15321	https://onlinelibrary.wiley.com/doi/full/10.1111/pbi.13558
PlantKGA_431	Apiales	Araliaceae	Panax	notoginseng	Panax notoginseng		三七	chromosome	Yes	转录本	Pno06G002250t1	Pno06G002250t11288xxPlantKGA_431	Pno06G002250	L	partial	6	158153857	158169177	+	Pfam	PF13855	Leucine rich repeat	Leucine-rich repeat	241	298	TLEVLRLDRNAFTDIVPTSLTNLTNIIELNLAHNNFSGPLPDLAGMNSLNYVDLSNNS	3.7e-08	MAAIPLLFFLVFLAFIHGISSVTDPGDVAVLVSLKNQWQNTPPSWDQSDDPCGDSWEGVTCDNSRVIGLSLSTIGLVGGLSGDIGGLSKLNSLDLSYNKGLTGSLSPRFGDLKILNVLILAGCGFTGTIPTELGNLSEISFIALNSNNFTGEIPPSLGNLSKLYWLDLADNQLTGSIPVSTLTTPGLDLLKKAKHFHFNKNQLSGQIPAKLFSSDMVLIHALFDENQLTGMIPSTIGLVQTLEVLRLDRNAFTDIVPTSLTNLTNIIELNLAHNNFSGPLPDLAGMNSLNYVDLSNNSFNPSEAPEWFSTLQSLTTLVIEYGSLQGPVPQQLFGFPQLQQVKLRNNGFNDTLDMGSSISQQLQLVDLQNNQISTVVLRSGFNNTLLLNGNPACDKAVNS…	545	15321	https://onlinelibrary.wiley.com/doi/full/10.1111/pbi.13558
PlantKGA_431	Apiales	Araliaceae	Panax	notoginseng	Panax notoginseng		三七	chromosome	Yes	转录本	Pno06G003523t1	Pno06G003523t11288xxPlantKGA_431	Pno06G003523	L	partial	6	18697628	18708584	+	Pfam	PF13855	Leucine rich repeat	Leucine-rich repeat	419	475	GLEKIDLHNNSLIGLIPDFLGDLPNLTELNLADNQFSGTVPTSLKKNNKLKLDVTGN	2.3e-07	MANLVLALLALCAISGYADVLYSIDCGSASNTEFYTDDYLNVWIGDEDYIQNGVTQRVQSNDSVFSVMDTLRVFTTRKKNCYSLDGEKGGKILVRASFLYGNYDKKSSPPTFDLQFDGNEWTTVVTSNNGVVTYEAICVTKGDLISVCVAQTKPDQFPFISALQIRSLDSNMYNKVDSNYALFLESRVAYGADAIVRSPSDRYDRIWVPAEIGNGQVNVTSDNSFPFVVNIADNPPLAVLQNAISTTTTSDNFILASGFPSGDVSVYFNMYFSEPTELDSTQTRSFKIYLDNQPETIAIIPPYQNVTEYGGNITVSSKTTLSLVATPDSKLPPLINAMEVFYISKELTEGTHSDDVEGLDLLKTTFPILQEWSGDPCLPASFTWDWLDCSTDATPRITA…	607	10957	https://onlinelibrary.wiley.com/doi/full/10.1111/pbi.13558
PlantKGA_431	Apiales	Araliaceae	Panax	notoginseng	Panax notoginseng		三七	chromosome	Yes	转录本	Pno06G003611t1	Pno06G003611t11288xxPlantKGA_431	Pno06G003611	L	partial	6	188734437	188736251	+	Pfam	PF08263	Leucine rich repeat N-terminal domain	Leucine-rich repeat-containing N-terminal, plant-type	76	109	TGLQAWKAAIKDDPLGILSTWVGSNVCAYKGVFC	0.00012	MEKKNLLLVFLLQMIATEAAFSVGGGVGLGIGIGGGVNGGGGGGGGGGVWVGGGGGINSPTPSGSYSASRLSNAYTGLQAWKAAIKDDPLGILSTWVGSNVCAYKGVFCADLQNEMGGSTISVVAGIDLNHANLQGTLVKELSLLTDMSLLHLNSNRFTGTVPDTFRDLISLNELDLSNNHFSGPFPTSTLVIPNLLYLDLRFNNFQGPIPEDVFNKRLDAIFLNNNQFDGEIPQNLGNSPASVINLANNKLTGEIPFSLGYMSPKLKEVLFLNNQLTGCIPEGVGLWSEMEVFDVSFNSLMGHLPDSISCLDEIEVLNLGHNKISGVLPELVCSLKSLVNLTVAYNFLSGFSQECSKLFYRNVGFDFTSNCIPGREMQRPQPECSGIPGGSLSCLRIP…	420	1815	https://onlinelibrary.wiley.com/doi/full/10.1111/pbi.13558
PlantKGA_431	Apiales	Araliaceae	Panax	notoginseng	Panax notoginseng		三七	chromosome	Yes	转录本	Pno06G003611t1	Pno06G003611t11288xxPlantKGA_431	Pno06G003611	L	partial	6	188734437	188736251	+	Pfam	PF13855	Leucine rich repeat	Leucine-rich repeat	150	206	LLHLNSNRFTGTVPDTFRDLISLNELDLSNNHFSGPFPTSTLVIPNLLYLDLRFNNF	1.6e-07	MEKKNLLLVFLLQMIATEAAFSVGGGVGLGIGIGGGVNGGGGGGGGGGVWVGGGGGINSPTPSGSYSASRLSNAYTGLQAWKAAIKDDPLGILSTWVGSNVCAYKGVFCADLQNEMGGSTISVVAGIDLNHANLQGTLVKELSLLTDMSLLHLNSNRFTGTVPDTFRDLISLNELDLSNNHFSGPFPTSTLVIPNLLYLDLRFNNFQGPIPEDVFNKRLDAIFLNNNQFDGEIPQNLGNSPASVINLANNKLTGEIPFSLGYMSPKLKEVLFLNNQLTGCIPEGVGLWSEMEVFDVSFNSLMGHLPDSISCLDEIEVLNLGHNKISGVLPELVCSLKSLVNLTVAYNFLSGFSQECSKLFYRNVGFDFTSNCIPGREMQRPQPECSGIPGGSLSCLRIP…	420	1815	https://onlinelibrary.wiley.com/doi/full/10.1111/pbi.13558
PlantKGA_431	Apiales	Araliaceae	Panax	notoginseng	Panax notoginseng		三七	chromosome	Yes	转录本	Pno06G003790t1	Pno06G003790t11288xxPlantKGA_431	Pno06G003790	L	partial	6	191874652	191877000	+	Pfam	PF08263	Leucine rich repeat N-terminal domain	Leucine-rich repeat-containing N-terminal, plant-type	83	116	IALQAWKQAILSDPLNLTANWVRSDVCSYTGVFC	8.3e-05	MKKKSSSVQSFFSFFLLTIFSLFCFFFLQAESITNGPLTDAETLYIKQRQLLYYRDEYGDRGENVTVDPSLVFENPRLKNAYIALQAWKQAILSDPLNLTANWVRSDVCSYTGVFCAFAPDNSSDRTVAGIDLNHGDIAGYLPEELGFLTDLALFHINSNRFCGTIPRKFKDLRILYELDVSNNRFAGKFPYVVLGLPKLKFLDLRFNEFEGKVPKELFDKDLDAIFINHNRFRFEIPDNFGNSPVSVIVIAGNDFRGCLPASIGNMSDTLNEVIMMDNGLRSCFPVEVGLLKELTVFDVSFNELMGPLPDSIGGMLSLEQLNVAHNMLSGSIPASICSLPRLQNFTYSYNFFTGEPPACLGLSDFSDGRNCLPARPVQRSAAQCKGFLSKGVDCSSFR…	782	2349	https://onlinelibrary.wiley.com/doi/full/10.1111/pbi.13558
PlantKGA_431	Apiales	Araliaceae	Panax	notoginseng	Panax notoginseng		三七	chromosome	Yes	转录本	Pno06G004032t1	Pno06G004032t11288xxPlantKGA_431	Pno06G004032	L	partial	6	195010630	195013970	+	Pfam	PF00560	Leucine Rich Repeat	Leucine-rich repeat	672	691	LQVLDLSNNGLSGIIPPCLL	0.11	MKIPLFTLLFLVSLFQILLSIDLVLVSGQCLENQRSLLVQLKNGLTFDPSSSTKLVRWNQTSTDCCNWEGVTCNTNTGHVIGLDLNNESIAVGINSSSTLFSLQFLQRLDLASNNFSSAQIPSGLFNLTSLTYLNLSNSGFAGQIPNGFSRLTRLVILDLSSIYVFGKSSLKLENPNLTMLVQNHTELTELYLDGVNISTQGYTWSQAISSSLPNLRVLSLSNSYISGPVDSSLEKLQFLSVIRLDQNKLNAPFPHFFANYLNLTSLRLSSCNLSGTFPEQILKRGTLQNLDLSLNHLLEGSLPELPQNGSLRTLVLSYTNFSGLLPDSIGNIGMVSRMELNNCNFSGKIPNSMAKLTQLVFLDFSFNKFTGHIPSFQNSKNLTYLDLSRNELSGTIPW…	1104	3341	https://onlinelibrary.wiley.com/doi/full/10.1111/pbi.13558
PlantKGA_431	Apiales	Araliaceae	Panax	notoginseng	Panax notoginseng		三七	chromosome	Yes	转录本	Pno06G004032t1	Pno06G004032t11288xxPlantKGA_431	Pno06G004032	L	partial	6	195010630	195013970	+	Pfam	PF08263	Leucine rich repeat N-terminal domain	Leucine-rich repeat-containing N-terminal, plant-type	32	74	ENQRSLLVQLKNGLTFDPSSSTKLVRWNQTSTDCCNWEGVTCN	1.6e-11	MKIPLFTLLFLVSLFQILLSIDLVLVSGQCLENQRSLLVQLKNGLTFDPSSSTKLVRWNQTSTDCCNWEGVTCNTNTGHVIGLDLNNESIAVGINSSSTLFSLQFLQRLDLASNNFSSAQIPSGLFNLTSLTYLNLSNSGFAGQIPNGFSRLTRLVILDLSSIYVFGKSSLKLENPNLTMLVQNHTELTELYLDGVNISTQGYTWSQAISSSLPNLRVLSLSNSYISGPVDSSLEKLQFLSVIRLDQNKLNAPFPHFFANYLNLTSLRLSSCNLSGTFPEQILKRGTLQNLDLSLNHLLEGSLPELPQNGSLRTLVLSYTNFSGLLPDSIGNIGMVSRMELNNCNFSGKIPNSMAKLTQLVFLDFSFNKFTGHIPSFQNSKNLTYLDLSRNELSGTIPW…	1104	3341	https://onlinelibrary.wiley.com/doi/full/10.1111/pbi.13558
PlantKGA_431	Apiales	Araliaceae	Panax	notoginseng	Panax notoginseng		三七	chromosome	Yes	转录本	Pno06G004032t1	Pno06G004032t11288xxPlantKGA_431	Pno06G004032	L	partial	6	195010630	195013970	+	Pfam	PF13855	Leucine rich repeat	Leucine-rich repeat	376	417	SFQNSKNLTYLDLSRNELSGTIPWTHFEGLVNLVNIDLRFNA	1e-06	MKIPLFTLLFLVSLFQILLSIDLVLVSGQCLENQRSLLVQLKNGLTFDPSSSTKLVRWNQTSTDCCNWEGVTCNTNTGHVIGLDLNNESIAVGINSSSTLFSLQFLQRLDLASNNFSSAQIPSGLFNLTSLTYLNLSNSGFAGQIPNGFSRLTRLVILDLSSIYVFGKSSLKLENPNLTMLVQNHTELTELYLDGVNISTQGYTWSQAISSSLPNLRVLSLSNSYISGPVDSSLEKLQFLSVIRLDQNKLNAPFPHFFANYLNLTSLRLSSCNLSGTFPEQILKRGTLQNLDLSLNHLLEGSLPELPQNGSLRTLVLSYTNFSGLLPDSIGNIGMVSRMELNNCNFSGKIPNSMAKLTQLVFLDFSFNKFTGHIPSFQNSKNLTYLDLSRNELSGTIPW…	1104	3341	https://onlinelibrary.wiley.com/doi/full/10.1111/pbi.13558
PlantKGA_431	Apiales	Araliaceae	Panax	notoginseng	Panax notoginseng		三七	chromosome	Yes	转录本	Pno06G004032t1	Pno06G004032t11288xxPlantKGA_431	Pno06G004032	L	partial	6	195010630	195013970	+	Pfam	PF13855	Leucine rich repeat	Leucine-rich repeat	870	926	SIDISNNKFEGDIPETVGKLKALYLLNFSHNALTGSIPPSLQNLKQLEALDLSVNKL	5.2e-08	MKIPLFTLLFLVSLFQILLSIDLVLVSGQCLENQRSLLVQLKNGLTFDPSSSTKLVRWNQTSTDCCNWEGVTCNTNTGHVIGLDLNNESIAVGINSSSTLFSLQFLQRLDLASNNFSSAQIPSGLFNLTSLTYLNLSNSGFAGQIPNGFSRLTRLVILDLSSIYVFGKSSLKLENPNLTMLVQNHTELTELYLDGVNISTQGYTWSQAISSSLPNLRVLSLSNSYISGPVDSSLEKLQFLSVIRLDQNKLNAPFPHFFANYLNLTSLRLSSCNLSGTFPEQILKRGTLQNLDLSLNHLLEGSLPELPQNGSLRTLVLSYTNFSGLLPDSIGNIGMVSRMELNNCNFSGKIPNSMAKLTQLVFLDFSFNKFTGHIPSFQNSKNLTYLDLSRNELSGTIPW…	1104	3341	https://onlinelibrary.wiley.com/doi/full/10.1111/pbi.13558
PlantKGA_431	Apiales	Araliaceae	Panax	notoginseng	Panax notoginseng		三七	chromosome	Yes	转录本	Pno06G004032t1	Pno06G004032t11288xxPlantKGA_431	Pno06G004032	L	partial	6	195010630	195013970	+	Pfam	PF13855	Leucine rich repeat	Leucine-rich repeat	697	755	LGVLNLGNNSLTSNISGTFGRNCGLKTLDLHANHLEGNVPQSLANCTMLEVLNLGSNQI	9.9e-07	MKIPLFTLLFLVSLFQILLSIDLVLVSGQCLENQRSLLVQLKNGLTFDPSSSTKLVRWNQTSTDCCNWEGVTCNTNTGHVIGLDLNNESIAVGINSSSTLFSLQFLQRLDLASNNFSSAQIPSGLFNLTSLTYLNLSNSGFAGQIPNGFSRLTRLVILDLSSIYVFGKSSLKLENPNLTMLVQNHTELTELYLDGVNISTQGYTWSQAISSSLPNLRVLSLSNSYISGPVDSSLEKLQFLSVIRLDQNKLNAPFPHFFANYLNLTSLRLSSCNLSGTFPEQILKRGTLQNLDLSLNHLLEGSLPELPQNGSLRTLVLSYTNFSGLLPDSIGNIGMVSRMELNNCNFSGKIPNSMAKLTQLVFLDFSFNKFTGHIPSFQNSKNLTYLDLSRNELSGTIPW…	1104	3341	https://onlinelibrary.wiley.com/doi/full/10.1111/pbi.13558
PlantKGA_431	Apiales	Araliaceae	Panax	notoginseng	Panax notoginseng		三七	chromosome	Yes	转录本	Pno06G004032t1	Pno06G004032t11288xxPlantKGA_431	Pno06G004032	L	partial	6	195010630	195013970	+	Pfam	PF13855	Leucine rich repeat	Leucine-rich repeat	455	515	QLDTLDLSSNNLNGSIPPSLFELKRLNILSLSSNKLTGLIQLETILRLANLTSLDLSYNNL	7.8e-08	MKIPLFTLLFLVSLFQILLSIDLVLVSGQCLENQRSLLVQLKNGLTFDPSSSTKLVRWNQTSTDCCNWEGVTCNTNTGHVIGLDLNNESIAVGINSSSTLFSLQFLQRLDLASNNFSSAQIPSGLFNLTSLTYLNLSNSGFAGQIPNGFSRLTRLVILDLSSIYVFGKSSLKLENPNLTMLVQNHTELTELYLDGVNISTQGYTWSQAISSSLPNLRVLSLSNSYISGPVDSSLEKLQFLSVIRLDQNKLNAPFPHFFANYLNLTSLRLSSCNLSGTFPEQILKRGTLQNLDLSLNHLLEGSLPELPQNGSLRTLVLSYTNFSGLLPDSIGNIGMVSRMELNNCNFSGKIPNSMAKLTQLVFLDFSFNKFTGHIPSFQNSKNLTYLDLSRNELSGTIPW…	1104	3341	https://onlinelibrary.wiley.com/doi/full/10.1111/pbi.13558
PlantKGA_431	Apiales	Araliaceae	Panax	notoginseng	Panax notoginseng		三七	chromosome	Yes	转录本	Pno06G004067t1	Pno06G004067t11288xxPlantKGA_431	Pno06G004067	L	partial	6	195329242	195334237	-	Pfam	PF13516	Leucine Rich repeat	Leucine-rich repeat	456	480	SCLKLTELDLYRCAGITDMGILAIS	1.2	MKSQKSAPESNINLFDHLSEEIIFTILDSLTDNPFDTKSFSLVCKSFYNIESLHRKTLKPLRSQHLPKILNRYPCITDLDLSLCPRITDGSLTILSGICKEMLRSINLSGSKYFTHVGLSNLVMYCRNLVEIDLSNAEELRDSAVATLAEAKNLERLCLARCKSITDIGIGCIAVGCRKLRLISLRWCLGVGDLGVGLIAVKCKEICSLDLSYLPITEKCLPQILKLQNLEHLVLEGCIGIDDDSLAALKHGFKTLQTLNMSSCENVSHVGLSSLTDEAGSLRQLTLAYGSPVTLALAKSLQNLSMLQSIKLDGCQVTCSGLKAIGNWCISLRELSLSKCMGVTDEGLSSLVTTHKDLRKLDITCCRKITHISISQITNSCTSLTSFRMESCTLVPRES…	665	4996	https://onlinelibrary.wiley.com/doi/full/10.1111/pbi.13558
PlantKGA_431	Apiales	Araliaceae	Panax	notoginseng	Panax notoginseng		三七	chromosome	Yes	转录本	Pno06G004067t1	Pno06G004067t11288xxPlantKGA_431	Pno06G004067	L	partial	6	195329242	195334237	-	Pfam	PF13516	Leucine Rich repeat	Leucine-rich repeat	407	429	CHFLEDLDLTDNEVDDEGLKSIS	0.00018	MKSQKSAPESNINLFDHLSEEIIFTILDSLTDNPFDTKSFSLVCKSFYNIESLHRKTLKPLRSQHLPKILNRYPCITDLDLSLCPRITDGSLTILSGICKEMLRSINLSGSKYFTHVGLSNLVMYCRNLVEIDLSNAEELRDSAVATLAEAKNLERLCLARCKSITDIGIGCIAVGCRKLRLISLRWCLGVGDLGVGLIAVKCKEICSLDLSYLPITEKCLPQILKLQNLEHLVLEGCIGIDDDSLAALKHGFKTLQTLNMSSCENVSHVGLSSLTDEAGSLRQLTLAYGSPVTLALAKSLQNLSMLQSIKLDGCQVTCSGLKAIGNWCISLRELSLSKCMGVTDEGLSSLVTTHKDLRKLDITCCRKITHISISQITNSCTSLTSFRMESCTLVPRES…	665	4996	https://onlinelibrary.wiley.com/doi/full/10.1111/pbi.13558
PlantKGA_431	Apiales	Araliaceae	Panax	notoginseng	Panax notoginseng		三七	chromosome	Yes	转录本	Pno06G004067t1	Pno06G004067t11288xxPlantKGA_431	Pno06G004067	L	partial	6	195329242	195334237	-	Pfam	PF13516	Leucine Rich repeat	Leucine-rich repeat	560	582	SQNLRQINLSYSSVTDVGLLSLA	1	MKSQKSAPESNINLFDHLSEEIIFTILDSLTDNPFDTKSFSLVCKSFYNIESLHRKTLKPLRSQHLPKILNRYPCITDLDLSLCPRITDGSLTILSGICKEMLRSINLSGSKYFTHVGLSNLVMYCRNLVEIDLSNAEELRDSAVATLAEAKNLERLCLARCKSITDIGIGCIAVGCRKLRLISLRWCLGVGDLGVGLIAVKCKEICSLDLSYLPITEKCLPQILKLQNLEHLVLEGCIGIDDDSLAALKHGFKTLQTLNMSSCENVSHVGLSSLTDEAGSLRQLTLAYGSPVTLALAKSLQNLSMLQSIKLDGCQVTCSGLKAIGNWCISLRELSLSKCMGVTDEGLSSLVTTHKDLRKLDITCCRKITHISISQITNSCTSLTSFRMESCTLVPRES…	665	4996	https://onlinelibrary.wiley.com/doi/full/10.1111/pbi.13558
PlantKGA_431	Apiales	Araliaceae	Panax	notoginseng	Panax notoginseng		三七	chromosome	Yes	转录本	Pno06G004067t1	Pno06G004067t11288xxPlantKGA_431	Pno06G004067	L	partial	6	195329242	195334237	-	Pfam	PF13516	Leucine Rich repeat	Leucine-rich repeat	329	351	CISLRELSLSKCMGVTDEGLSSL	0.2	MKSQKSAPESNINLFDHLSEEIIFTILDSLTDNPFDTKSFSLVCKSFYNIESLHRKTLKPLRSQHLPKILNRYPCITDLDLSLCPRITDGSLTILSGICKEMLRSINLSGSKYFTHVGLSNLVMYCRNLVEIDLSNAEELRDSAVATLAEAKNLERLCLARCKSITDIGIGCIAVGCRKLRLISLRWCLGVGDLGVGLIAVKCKEICSLDLSYLPITEKCLPQILKLQNLEHLVLEGCIGIDDDSLAALKHGFKTLQTLNMSSCENVSHVGLSSLTDEAGSLRQLTLAYGSPVTLALAKSLQNLSMLQSIKLDGCQVTCSGLKAIGNWCISLRELSLSKCMGVTDEGLSSLVTTHKDLRKLDITCCRKITHISISQITNSCTSLTSFRMESCTLVPRES…	665	4996	https://onlinelibrary.wiley.com/doi/full/10.1111/pbi.13558
PlantKGA_431	Apiales	Araliaceae	Panax	notoginseng	Panax notoginseng		三七	chromosome	Yes	转录本	Pno06G004264t3	Pno06G004264t31288xxPlantKGA_431	Pno06G004264	L	partial	6	2058563	2063072	+	Pfam	PF13855	Leucine rich repeat	Leucine-rich repeat	277	335	SLVEVDISSNLLVELPESFGNLRNLKALYLDNNGLKSLPATLLKMCTQLSTLELHGTEI	1.6e-06	MDKGEATGEIEDKETQNLIKITVKFSGRSIPINLSVDSTIKDLKSLLQPLTNVLPRGQKLISRGKLLVDEMKLRYSEITNGSKIMLIASQGLHQGNGPIKKEAPALPRRMAESNRRNIEKKDMSVQKTRLERWKATGVLALSESDLKAIPNEVWTCGPSARVLDLSHNFIENVPASISCLTSVQKLFLNSNNISDESINWEGLSSLRSLTFMSLSQNHLTSLPSALGALTCLSQLHLVSNKLTCLPNEIGLLTKLQVLKANNNRISTISPCIGSCISLVEVDISSNLLVELPESFGNLRNLKALYLDNNGLKSLPATLLKMCTQLSTLELHGTEITMDLLREFDGWGNFDERRRLKHQKQLEFRVAGDAGVFDEGADKS	379	4510	https://onlinelibrary.wiley.com/doi/full/10.1111/pbi.13558
PlantKGA_431	Apiales	Araliaceae	Panax	notoginseng	Panax notoginseng		三七	chromosome	Yes	转录本	Pno06G004264t3	Pno06G004264t31288xxPlantKGA_431	Pno06G004264	L	partial	6	2058563	2063072	+	Pfam	PF13855	Leucine rich repeat	Leucine-rich repeat	139	193	LALSESDLKAIPNEVWTCGPSARVLDLSHNFIENVPASISCLTSVQKLFLNSNNI	7.8e-07	MDKGEATGEIEDKETQNLIKITVKFSGRSIPINLSVDSTIKDLKSLLQPLTNVLPRGQKLISRGKLLVDEMKLRYSEITNGSKIMLIASQGLHQGNGPIKKEAPALPRRMAESNRRNIEKKDMSVQKTRLERWKATGVLALSESDLKAIPNEVWTCGPSARVLDLSHNFIENVPASISCLTSVQKLFLNSNNISDESINWEGLSSLRSLTFMSLSQNHLTSLPSALGALTCLSQLHLVSNKLTCLPNEIGLLTKLQVLKANNNRISTISPCIGSCISLVEVDISSNLLVELPESFGNLRNLKALYLDNNGLKSLPATLLKMCTQLSTLELHGTEITMDLLREFDGWGNFDERRRLKHQKQLEFRVAGDAGVFDEGADKS	379	4510	https://onlinelibrary.wiley.com/doi/full/10.1111/pbi.13558
PlantKGA_431	Apiales	Araliaceae	Panax	notoginseng	Panax notoginseng		三七	chromosome	Yes	转录本	Pno06G004757t1	Pno06G004757t11288xxPlantKGA_431	Pno06G004757	L	partial	6	24670959	24672192	+	Pfam	PF08263	Leucine rich repeat N-terminal domain	Leucine-rich repeat-containing N-terminal, plant-type	37	92	PNKQMLALFRFKQTLSINIDSFASSTCNIFGNIPYPKTNQWKTSSDCCEWDGVVCN	8.2e-06	MGHSAVLLPWLTPYMLIFFLQHHPFLYSSAHDNHLCPNKQMLALFRFKQTLSINIDSFASSTCNIFGNIPYPKTNQWKTSSDCCEWDGVVCNPLTGDVIGLDLSCSHLVGVLHSNSSLFQLPHLQRLDLAFNDFSRSIIPREFGRFATSLTHLNLSRSRVSGPLPLEISHLSKLVSLDLSYNHNLILNDGNSEFQHQFLKFLLHNLTQLRHLSFAYVSIDSVLPRNLSSFSSLTFLDLSATGLRRELPHEIFILSNLKTLSITSMRELDLSFTMLSEVPDVIGSLKSLKSLNLGFCNLSGSIPKFISNLTHLTELDLSINHLQGQISNGFVNLVHLRSLSLGYNKLTIGPFPSWVANLSQLVSLDLLGSSLMGPLPSNITGL	382	1234	https://onlinelibrary.wiley.com/doi/full/10.1111/pbi.13558
PlantKGA_431	Apiales	Araliaceae	Panax	notoginseng	Panax notoginseng		三七	chromosome	Yes	转录本	Pno06G004757t1	Pno06G004757t11288xxPlantKGA_431	Pno06G004757	L	partial	6	24670959	24672192	+	Pfam	PF13855	Leucine rich repeat	Leucine-rich repeat	287	346	SLKSLNLGFCNLSGSIPKFISNLTHLTELDLSINHLQGQISNGFVNLVHLRSLSLGYNKL	6.8e-08	MGHSAVLLPWLTPYMLIFFLQHHPFLYSSAHDNHLCPNKQMLALFRFKQTLSINIDSFASSTCNIFGNIPYPKTNQWKTSSDCCEWDGVVCNPLTGDVIGLDLSCSHLVGVLHSNSSLFQLPHLQRLDLAFNDFSRSIIPREFGRFATSLTHLNLSRSRVSGPLPLEISHLSKLVSLDLSYNHNLILNDGNSEFQHQFLKFLLHNLTQLRHLSFAYVSIDSVLPRNLSSFSSLTFLDLSATGLRRELPHEIFILSNLKTLSITSMRELDLSFTMLSEVPDVIGSLKSLKSLNLGFCNLSGSIPKFISNLTHLTELDLSINHLQGQISNGFVNLVHLRSLSLGYNKLTIGPFPSWVANLSQLVSLDLLGSSLMGPLPSNITGL	382	1234	https://onlinelibrary.wiley.com/doi/full/10.1111/pbi.13558
PlantKGA_431	Apiales	Araliaceae	Panax	notoginseng	Panax notoginseng		三七	chromosome	Yes	转录本	Pno06G004757t1	Pno06G004757t11288xxPlantKGA_431	Pno06G004757	L	partial	6	24670959	24672192	+	Pfam	PF13516	Leucine Rich repeat	Leucine-rich repeat	121	134	LPHLQRLDLAFNDF	1.1	MGHSAVLLPWLTPYMLIFFLQHHPFLYSSAHDNHLCPNKQMLALFRFKQTLSINIDSFASSTCNIFGNIPYPKTNQWKTSSDCCEWDGVVCNPLTGDVIGLDLSCSHLVGVLHSNSSLFQLPHLQRLDLAFNDFSRSIIPREFGRFATSLTHLNLSRSRVSGPLPLEISHLSKLVSLDLSYNHNLILNDGNSEFQHQFLKFLLHNLTQLRHLSFAYVSIDSVLPRNLSSFSSLTFLDLSATGLRRELPHEIFILSNLKTLSITSMRELDLSFTMLSEVPDVIGSLKSLKSLNLGFCNLSGSIPKFISNLTHLTELDLSINHLQGQISNGFVNLVHLRSLSLGYNKLTIGPFPSWVANLSQLVSLDLLGSSLMGPLPSNITGL	382	1234	https://onlinelibrary.wiley.com/doi/full/10.1111/pbi.13558
PlantKGA_431	Apiales	Araliaceae	Panax	notoginseng	Panax notoginseng		三七	chromosome	Yes	转录本	Pno06G004758t1	Pno06G004758t11288xxPlantKGA_431	Pno06G004758	L	partial	6	24672465	24676062	+	Pfam	PF00560	Leucine Rich Repeat	Leucine-rich repeat	112	132	SLRYLYMSRNNFRGVLPHCLG	1.3	MFSSLKTLEILKLSYNNNLSVRWSTTNNTIINATFPKLKSLELSSLKIKEFPYFLRAMENLEWLDLSNNQINGRFPEWVASKWKDSLYSLNLNSNFLEGSIPLWMWICNSSSLRYLYMSRNNFRGVLPHCLGDLSDSLYALDLSMNHFQGTIPSTLASLNKLGYLDLHGNQFEGMVPNLGNCSLPSEISHLSKLVSLDLSRNRNLILNDSNTEFQHQFLKFLLHNFTQLRHLSLAYVPIDSVLPSNLSSSSSLTFLDLSETGLRGELPHEIFILPNLKTLRLHGNHIVTGVLPQSNLSASNGSSITSLRELNLSETMLSEVLNVVGSLKSLKSLNLFFCNLSGSIPKFISNLTVCGFPLSECEKGEIPPVVQEENDSDFMDGFTWEAGNQNGLRESSGH…	439	3598	https://onlinelibrary.wiley.com/doi/full/10.1111/pbi.13558
PlantKGA_431	Apiales	Araliaceae	Panax	notoginseng	Panax notoginseng		三七	chromosome	Yes	转录本	Pno06G004762t1	Pno06G004762t11288xxPlantKGA_431	Pno06G004762	L	partial	6	24703732	24705306	+	Pfam	PF13855	Leucine rich repeat	Leucine-rich repeat	215	274	SLKSLNLGFCNLSGSIPKFISNLTHLTKLDLSSNHLQGQIPNGFANLVHLRSLSLVPNKL	5.2e-09	MLALFQFKQRLSISTSWGCGEYSNTSPCPKINQWKMSSDCCKCGSMIPREFGRFATSLTHLNLSRSNFLGPLPSEISHLSKLVSLDLSLNRNLILNDNNIESQHQFLLHNLTQLRHLSLAYIPIDSVLPSNLSSFSSLTILDLSYTGLHRELPHEIFILSNLKTLRLRGNRNVSGVLPQSNLSASNHSSIISMRELDLSGTMLSEVPDVVGSLKSLKSLNLGFCNLSGSIPKFISNLTHLTKLDLSSNHLQGQIPNGFANLVHLRSLSLVPNKLNIGPFTTWVANLSQLVSLDLSDSSLLGPLPSNITGLQKLTSLSLSGNSLNGTIPSWIFNLLLLEFLDIHYTQLTGRLDEFQFKSNSLVDIYLNDNELSGFVPQSIFQQVDLRSLCLDSNKLSGNI…	475	1575	https://onlinelibrary.wiley.com/doi/full/10.1111/pbi.13558
PlantKGA_431	Apiales	Araliaceae	Panax	notoginseng	Panax notoginseng		三七	chromosome	Yes	转录本	Pno06G004763t1	Pno06G004763t11288xxPlantKGA_431	Pno06G004763	L	partial	6	24705430	24706926	+	Pfam	PF00560	Leucine Rich Repeat	Leucine-rich repeat	239	258	KLRIINLSGNEFSGLLPELF	1.1	MSSNNFSGVLPHCLGNLSDSLSTLDLSMNHFHGTIPSTLASLNKLNSLYLQGNQFEGMMPNLGNCTSLQTIDLESNKLKDTFPRWLETLPQLSFLILRSNEFNGPIFISNISETNFLQVMDLSNNEFRGEIPNVLGTFQFLTDLDMHKNNFRGTIPSTFAKGNPLRSLNLHNNHLRGGVPSSLTNCSRLEVLDLRKNQINDTFPNWLGTLPELHVLVLSFNRFHGPIITTSENKNPFPKLRIINLSGNEFSGLLPELFFKNFIAMKDADENTKKTEYLGNRFYQNSLILVMKGVTIELQRILTTLTTIDLSSNKFQGEIPDIIKNLKFLRQLNLSHNSLVGRIPSLLGNLSVLESLDLNSNQLEGEIPQELANLNFLGKLNLSYNHLRGRILSGSQFET…	498	1497	https://onlinelibrary.wiley.com/doi/full/10.1111/pbi.13558
PlantKGA_431	Apiales	Araliaceae	Panax	notoginseng	Panax notoginseng		三七	chromosome	Yes	转录本	Pno06G004763t1	Pno06G004763t11288xxPlantKGA_431	Pno06G004763	L	partial	6	24705430	24706926	+	Pfam	PF13855	Leucine rich repeat	Leucine-rich repeat	165	223	LRSLNLHNNHLRGGVPSSLTNCSRLEVLDLRKNQINDTFPNWLGTLPELHVLVLSFNRF	1.3e-08	MSSNNFSGVLPHCLGNLSDSLSTLDLSMNHFHGTIPSTLASLNKLNSLYLQGNQFEGMMPNLGNCTSLQTIDLESNKLKDTFPRWLETLPQLSFLILRSNEFNGPIFISNISETNFLQVMDLSNNEFRGEIPNVLGTFQFLTDLDMHKNNFRGTIPSTFAKGNPLRSLNLHNNHLRGGVPSSLTNCSRLEVLDLRKNQINDTFPNWLGTLPELHVLVLSFNRFHGPIITTSENKNPFPKLRIINLSGNEFSGLLPELFFKNFIAMKDADENTKKTEYLGNRFYQNSLILVMKGVTIELQRILTTLTTIDLSSNKFQGEIPDIIKNLKFLRQLNLSHNSLVGRIPSLLGNLSVLESLDLNSNQLEGEIPQELANLNFLGKLNLSYNHLRGRILSGSQFET…	498	1497	https://onlinelibrary.wiley.com/doi/full/10.1111/pbi.13558
PlantKGA_431	Apiales	Araliaceae	Panax	notoginseng	Panax notoginseng		三七	chromosome	Yes	转录本	Pno06G004763t1	Pno06G004763t11288xxPlantKGA_431	Pno06G004763	L	partial	6	24705430	24706926	+	Pfam	PF13855	Leucine rich repeat	Leucine-rich repeat	304	363	TLTTIDLSSNKFQGEIPDIIKNLKFLRQLNLSHNSLVGRIPSLLGNLSVLESLDLNSNQL	3.6e-07	MSSNNFSGVLPHCLGNLSDSLSTLDLSMNHFHGTIPSTLASLNKLNSLYLQGNQFEGMMPNLGNCTSLQTIDLESNKLKDTFPRWLETLPQLSFLILRSNEFNGPIFISNISETNFLQVMDLSNNEFRGEIPNVLGTFQFLTDLDMHKNNFRGTIPSTFAKGNPLRSLNLHNNHLRGGVPSSLTNCSRLEVLDLRKNQINDTFPNWLGTLPELHVLVLSFNRFHGPIITTSENKNPFPKLRIINLSGNEFSGLLPELFFKNFIAMKDADENTKKTEYLGNRFYQNSLILVMKGVTIELQRILTTLTTIDLSSNKFQGEIPDIIKNLKFLRQLNLSHNSLVGRIPSLLGNLSVLESLDLNSNQLEGEIPQELANLNFLGKLNLSYNHLRGRILSGSQFET…	498	1497	https://onlinelibrary.wiley.com/doi/full/10.1111/pbi.13558
PlantKGA_431	Apiales	Araliaceae	Panax	notoginseng	Panax notoginseng		三七	chromosome	Yes	转录本	Pno06G004837t1	Pno06G004837t11288xxPlantKGA_431	Pno06G004837	L	partial	6	25290607	25295222	-	Pfam	PF13516	Leucine Rich repeat	Leucine-rich repeat	117	132	LPHLQRLDLASNDFSG	1.6	MGQSAVLLPWLTPYLLIFFLQYHTFVYSSAHDNHLCPNEQMLALFRFKQTLSINIDSFDILGNTPSYPKTNQWNMSSDCCKWDGVASDRLTGDVIGLDFSCNQLVGVFHSNSSLFQLPHLQRLDLASNDFSGSMIPREFGRFATSLTHLNLSRSNISGPLPLEISHLSKLVSLDLSYNHNLILNDSNTIFHHQFLKFLLHNLTQLRHLSLAFVHIDSVLPRNLSSSSSLTILDLSYTGLRGKLPHEIFILPNLKTLRLRGNLNVTGVLPQSNLSASNGSSITSLRELDLSGTMLSEVPDVVGSLKSLKSLNLLFCNLSGFIPKFISNLTHLTELYLSFNHLQGQIPNGFANLVHLRSLSLGPNKLTIGPFPTWVANLTQLVSLDLSCSSLMGPLPSNIT…	1019	4616	https://onlinelibrary.wiley.com/doi/full/10.1111/pbi.13558
PlantKGA_431	Apiales	Araliaceae	Panax	notoginseng	Panax notoginseng		三七	chromosome	Yes	转录本	Pno06G004837t1	Pno06G004837t11288xxPlantKGA_431	Pno06G004837	L	partial	6	25290607	25295222	-	Pfam	PF13855	Leucine rich repeat	Leucine-rich repeat	306	365	SLKSLNLLFCNLSGFIPKFISNLTHLTELYLSFNHLQGQIPNGFANLVHLRSLSLGPNKL	2.4e-07	MGQSAVLLPWLTPYLLIFFLQYHTFVYSSAHDNHLCPNEQMLALFRFKQTLSINIDSFDILGNTPSYPKTNQWNMSSDCCKWDGVASDRLTGDVIGLDFSCNQLVGVFHSNSSLFQLPHLQRLDLASNDFSGSMIPREFGRFATSLTHLNLSRSNISGPLPLEISHLSKLVSLDLSYNHNLILNDSNTIFHHQFLKFLLHNLTQLRHLSLAFVHIDSVLPRNLSSSSSLTILDLSYTGLRGKLPHEIFILPNLKTLRLRGNLNVTGVLPQSNLSASNGSSITSLRELDLSGTMLSEVPDVVGSLKSLKSLNLLFCNLSGFIPKFISNLTHLTELYLSFNHLQGQIPNGFANLVHLRSLSLGPNKLTIGPFPTWVANLTQLVSLDLSCSSLMGPLPSNIT…	1019	4616	https://onlinelibrary.wiley.com/doi/full/10.1111/pbi.13558
PlantKGA_431	Apiales	Araliaceae	Panax	notoginseng	Panax notoginseng		三七	chromosome	Yes	转录本	Pno06G004837t1	Pno06G004837t11288xxPlantKGA_431	Pno06G004837	L	partial	6	25290607	25295222	-	Pfam	PF13855	Leucine rich repeat	Leucine-rich repeat	379	438	QLVSLDLSCSSLMGPLPSNITGLQKLNFLSLSSNSLNGTIPSWIFDLPLLEFLDLAFNQL	5.1e-07	MGQSAVLLPWLTPYLLIFFLQYHTFVYSSAHDNHLCPNEQMLALFRFKQTLSINIDSFDILGNTPSYPKTNQWNMSSDCCKWDGVASDRLTGDVIGLDFSCNQLVGVFHSNSSLFQLPHLQRLDLASNDFSGSMIPREFGRFATSLTHLNLSRSNISGPLPLEISHLSKLVSLDLSYNHNLILNDSNTIFHHQFLKFLLHNLTQLRHLSLAFVHIDSVLPRNLSSSSSLTILDLSYTGLRGKLPHEIFILPNLKTLRLRGNLNVTGVLPQSNLSASNGSSITSLRELDLSGTMLSEVPDVVGSLKSLKSLNLLFCNLSGFIPKFISNLTHLTELYLSFNHLQGQIPNGFANLVHLRSLSLGPNKLTIGPFPTWVANLTQLVSLDLSCSSLMGPLPSNIT…	1019	4616	https://onlinelibrary.wiley.com/doi/full/10.1111/pbi.13558
PlantKGA_431	Apiales	Araliaceae	Panax	notoginseng	Panax notoginseng		三七	chromosome	Yes	转录本	Pno06G004837t1	Pno06G004837t11288xxPlantKGA_431	Pno06G004837	L	partial	6	25290607	25295222	-	Pfam	PF13855	Leucine rich repeat	Leucine-rich repeat	778	837	SLRSLNLHDNHLQGGVPSSLANCSWLEVLDLGKNQINDTFPNWLGTLPELHVLVLSFNRF	4.2e-08	MGQSAVLLPWLTPYLLIFFLQYHTFVYSSAHDNHLCPNEQMLALFRFKQTLSINIDSFDILGNTPSYPKTNQWNMSSDCCKWDGVASDRLTGDVIGLDFSCNQLVGVFHSNSSLFQLPHLQRLDLASNDFSGSMIPREFGRFATSLTHLNLSRSNISGPLPLEISHLSKLVSLDLSYNHNLILNDSNTIFHHQFLKFLLHNLTQLRHLSLAFVHIDSVLPRNLSSSSSLTILDLSYTGLRGKLPHEIFILPNLKTLRLRGNLNVTGVLPQSNLSASNGSSITSLRELDLSGTMLSEVPDVVGSLKSLKSLNLLFCNLSGFIPKFISNLTHLTELYLSFNHLQGQIPNGFANLVHLRSLSLGPNKLTIGPFPTWVANLTQLVSLDLSCSSLMGPLPSNIT…	1019	4616	https://onlinelibrary.wiley.com/doi/full/10.1111/pbi.13558
PlantKGA_431	Apiales	Araliaceae	Panax	notoginseng	Panax notoginseng		三七	chromosome	Yes	转录本	Pno06G004837t1	Pno06G004837t11288xxPlantKGA_431	Pno06G004837	L	partial	6	25290607	25295222	-	Pfam	PF08263	Leucine rich repeat N-terminal domain	Leucine-rich repeat-containing N-terminal, plant-type	37	85	PNEQMLALFRFKQTLSINIDSFDILGNTPSYPKTNQWNMSSDCCKWDGV	6.1e-06	MGQSAVLLPWLTPYLLIFFLQYHTFVYSSAHDNHLCPNEQMLALFRFKQTLSINIDSFDILGNTPSYPKTNQWNMSSDCCKWDGVASDRLTGDVIGLDFSCNQLVGVFHSNSSLFQLPHLQRLDLASNDFSGSMIPREFGRFATSLTHLNLSRSNISGPLPLEISHLSKLVSLDLSYNHNLILNDSNTIFHHQFLKFLLHNLTQLRHLSLAFVHIDSVLPRNLSSSSSLTILDLSYTGLRGKLPHEIFILPNLKTLRLRGNLNVTGVLPQSNLSASNGSSITSLRELDLSGTMLSEVPDVVGSLKSLKSLNLLFCNLSGFIPKFISNLTHLTELYLSFNHLQGQIPNGFANLVHLRSLSLGPNKLTIGPFPTWVANLTQLVSLDLSCSSLMGPLPSNIT…	1019	4616	https://onlinelibrary.wiley.com/doi/full/10.1111/pbi.13558
PlantKGA_431	Apiales	Araliaceae	Panax	notoginseng	Panax notoginseng		三七	chromosome	Yes	转录本	Pno06G006041t1	Pno06G006041t11288xxPlantKGA_431	Pno06G006041	L	partial	6	34628880	34630133	-	Pfam	PF00560	Leucine Rich Repeat	Leucine-rich repeat	270	291	LESLDLNSNQLEGEIPQELANL	0.54	MVPNLGNCTVLRFNVFHGPIFISNIFMTKYPFPNLCVMDLSNNEFRGKIPNVFGTFQFLENLDLRKNNFRGTIPSTFAKGNPLRSLNLHDNHLRGVPSSLANCSRLEVLDLGKNQINDTFPNWLGTLPELHVLVLSFNRFHAPINTTSMTKNPLPKLRINGLSCNEFSGLLPELFFKNFIAMKYVDENTKKAEYLGNSYYQNSVILVMKGVTIELERILTTLTTIDLSSNKFKGEIPDIIENLKFLRQLNLSHNSLVGCIPSLLGNLSVLESLDLNSNQLEGEIPQELANLNFLGKLNLSYNHLKGRIPSGSQFETFLNDSYYGNLAFCEFPLNECEKGEIPPVVQEENDSDFMDGFTWEAVLMGYGCGIVLGFIIGYIMFLVGKPKWFTGIVERELGR…	417	1254	https://onlinelibrary.wiley.com/doi/full/10.1111/pbi.13558
PlantKGA_431	Apiales	Araliaceae	Panax	notoginseng	Panax notoginseng		三七	chromosome	Yes	转录本	Pno06G006041t1	Pno06G006041t11288xxPlantKGA_431	Pno06G006041	L	partial	6	34628880	34630133	-	Pfam	PF13516	Leucine Rich repeat	Leucine-rich repeat	220	235	TTLTTIDLSSNKFKGE	1.3	MVPNLGNCTVLRFNVFHGPIFISNIFMTKYPFPNLCVMDLSNNEFRGKIPNVFGTFQFLENLDLRKNNFRGTIPSTFAKGNPLRSLNLHDNHLRGVPSSLANCSRLEVLDLGKNQINDTFPNWLGTLPELHVLVLSFNRFHAPINTTSMTKNPLPKLRINGLSCNEFSGLLPELFFKNFIAMKYVDENTKKAEYLGNSYYQNSVILVMKGVTIELERILTTLTTIDLSSNKFKGEIPDIIENLKFLRQLNLSHNSLVGCIPSLLGNLSVLESLDLNSNQLEGEIPQELANLNFLGKLNLSYNHLKGRIPSGSQFETFLNDSYYGNLAFCEFPLNECEKGEIPPVVQEENDSDFMDGFTWEAVLMGYGCGIVLGFIIGYIMFLVGKPKWFTGIVERELGR…	417	1254	https://onlinelibrary.wiley.com/doi/full/10.1111/pbi.13558
PlantKGA_431	Apiales	Araliaceae	Panax	notoginseng	Panax notoginseng		三七	chromosome	Yes	转录本	Pno06G006041t1	Pno06G006041t11288xxPlantKGA_431	Pno06G006041	L	partial	6	34628880	34630133	-	Pfam	PF13855	Leucine rich repeat	Leucine-rich repeat	83	140	LRSLNLHDNHLRGVPSSLANCSRLEVLDLGKNQINDTFPNWLGTLPELHVLVLSFNRF	5.7e-09	MVPNLGNCTVLRFNVFHGPIFISNIFMTKYPFPNLCVMDLSNNEFRGKIPNVFGTFQFLENLDLRKNNFRGTIPSTFAKGNPLRSLNLHDNHLRGVPSSLANCSRLEVLDLGKNQINDTFPNWLGTLPELHVLVLSFNRFHAPINTTSMTKNPLPKLRINGLSCNEFSGLLPELFFKNFIAMKYVDENTKKAEYLGNSYYQNSVILVMKGVTIELERILTTLTTIDLSSNKFKGEIPDIIENLKFLRQLNLSHNSLVGCIPSLLGNLSVLESLDLNSNQLEGEIPQELANLNFLGKLNLSYNHLKGRIPSGSQFETFLNDSYYGNLAFCEFPLNECEKGEIPPVVQEENDSDFMDGFTWEAVLMGYGCGIVLGFIIGYIMFLVGKPKWFTGIVERELGR…	417	1254	https://onlinelibrary.wiley.com/doi/full/10.1111/pbi.13558
PlantKGA_431	Apiales	Araliaceae	Panax	notoginseng	Panax notoginseng		三七	chromosome	Yes	转录本	Pno06G006042t1	Pno06G006042t11288xxPlantKGA_431	Pno06G006042	L	partial	6	34630179	34640767	-	Pfam	PF13855	Leucine rich repeat	Leucine-rich repeat	341	400	SLKSLNLAFCNLSGSIPKFISNFTHLTELYLSINHLQGQILNGFANLVHLRSLSLGDNKL	2.5e-06	MANSRHHFPAQDVSPRLREYEGPSRWNEYLSQEMTSGVASRTYRNVGSEGPAQSSVGSYKGLNMQWVYQLTQVAEGLMAKIYRLNHMFTEAFWKAGVFPNLPKICDLLSKKFSEHHSKLQLERVDKVAMVSLNDHAEVHDLQSLEPWIHLISSKNYDKTRKHGRFKKRNSFYQLTQVAEGLMAKIYRLNHMFTEAFWKAGVFPNLPKICVLLSKKFSEHHSKLQLERDLFKKAILQPGPPVDFALQIVQEAIKPQQRLSINSSASWGCGEYGNTSPYPKTKQWKMGSDCCKWLRGNRNVTGVLPQSNLSASNGSCITSLWELDLSETMLSEVPDVVGSLKSLKSLNLAFCNLSGSIPKFISNFTHLTELYLSINHLQGQILNGFANLVHLRSLSLGDNK…	607	10589	https://onlinelibrary.wiley.com/doi/full/10.1111/pbi.13558
PlantKGA_431	Apiales	Araliaceae	Panax	notoginseng	Panax notoginseng		三七	chromosome	Yes	转录本	Pno06G006047t1	Pno06G006047t11288xxPlantKGA_431	Pno06G006047	L	partial	6	34673882	34676238	+	Pfam	PF08263	Leucine rich repeat N-terminal domain	Leucine-rich repeat-containing N-terminal, plant-type	3	51	ALFQFKQRLSINSFAFWGCGEYGNTSPYPKTNQWKMSSDCCKWYGVACN	0.00031	MLALFQFKQRLSINSFAFWGCGEYGNTSPYPKTNQWKMSSDCCKWYGVACNPLTGDVIGLDLSCSQLVGVHSNSSLFQLPQLQRLNLASNDFSGSMISREFGRFANLNLSRSNFSGLLPSEISHLSKMVSLDLSRNRNPNLNRNHNFILNDSNTEFQLKFLLHNVTQLRHLSLAYVPINSVLPSNLSSSSSLTILDLSYTRLRGELSHEIFILLNLKTLRLRGNRNVTGALPQSNLSASNGSCITSLRELDLSETMLSKVPDVVESLSLSYNNLLVRLSTINNTIINTTFPNLRIFELSSLKIKEFPYFLRAMENLGWLDLSNNQIHSRVPEWVPSKWRDSLCLEYLYMSSNNFSGVLTHCLGNLSLSTLDLSMNHFHDTISSTLASLNKLNSLNLQGN…	590	2357	https://onlinelibrary.wiley.com/doi/full/10.1111/pbi.13558
PlantKGA_431	Apiales	Araliaceae	Panax	notoginseng	Panax notoginseng		三七	chromosome	Yes	转录本	Pno06G006047t1	Pno06G006047t11288xxPlantKGA_431	Pno06G006047	L	partial	6	34673882	34676238	+	Pfam	PF13855	Leucine rich repeat	Leucine-rich repeat	516	573	RSLNLHDNHLRGGVPSSLANCSRLEVLDLGKNQINDTFPNWLGTLPELHVLVLSFNRF	9.3e-08	MLALFQFKQRLSINSFAFWGCGEYGNTSPYPKTNQWKMSSDCCKWYGVACNPLTGDVIGLDLSCSQLVGVHSNSSLFQLPQLQRLNLASNDFSGSMISREFGRFANLNLSRSNFSGLLPSEISHLSKMVSLDLSRNRNPNLNRNHNFILNDSNTEFQLKFLLHNVTQLRHLSLAYVPINSVLPSNLSSSSSLTILDLSYTRLRGELSHEIFILLNLKTLRLRGNRNVTGALPQSNLSASNGSCITSLRELDLSETMLSKVPDVVESLSLSYNNLLVRLSTINNTIINTTFPNLRIFELSSLKIKEFPYFLRAMENLGWLDLSNNQIHSRVPEWVPSKWRDSLCLEYLYMSSNNFSGVLTHCLGNLSLSTLDLSMNHFHDTISSTLASLNKLNSLNLQGN…	590	2357	https://onlinelibrary.wiley.com/doi/full/10.1111/pbi.13558
PlantKGA_431	Apiales	Araliaceae	Panax	notoginseng	Panax notoginseng		三七	chromosome	Yes	转录本	Pno06G006047t1	Pno06G006047t11288xxPlantKGA_431	Pno06G006047	L	partial	6	34673882	34676238	+	Pfam	PF00560	Leucine Rich Repeat	Leucine-rich repeat	466	486	NLRVMDLSNNEFRGKIPNVFG	0.75	MLALFQFKQRLSINSFAFWGCGEYGNTSPYPKTNQWKMSSDCCKWYGVACNPLTGDVIGLDLSCSQLVGVHSNSSLFQLPQLQRLNLASNDFSGSMISREFGRFANLNLSRSNFSGLLPSEISHLSKMVSLDLSRNRNPNLNRNHNFILNDSNTEFQLKFLLHNVTQLRHLSLAYVPINSVLPSNLSSSSSLTILDLSYTRLRGELSHEIFILLNLKTLRLRGNRNVTGALPQSNLSASNGSCITSLRELDLSETMLSKVPDVVESLSLSYNNLLVRLSTINNTIINTTFPNLRIFELSSLKIKEFPYFLRAMENLGWLDLSNNQIHSRVPEWVPSKWRDSLCLEYLYMSSNNFSGVLTHCLGNLSLSTLDLSMNHFHDTISSTLASLNKLNSLNLQGN…	590	2357	https://onlinelibrary.wiley.com/doi/full/10.1111/pbi.13558
PlantKGA_431	Apiales	Araliaceae	Panax	notoginseng	Panax notoginseng		三七	chromosome	Yes	转录本	Pno06G006062t1	Pno06G006062t11288xxPlantKGA_431	Pno06G006062	L	partial	6	34742017	34748248	+	Pfam	PF13855	Leucine rich repeat	Leucine-rich repeat	306	365	QLVSLDLSYSSLMGPLPSNITSLQKLTFLSLSSNSLNGTIPSWIFDLPLLEFLDLGFNQL	1.3e-06	MKAMAGMLSKFGDAMCSSCEMAVVWMQNQLRQNQTQDHILNYVNELCDGLPSPTGQSGVDCAKISFMPSVAFTIGGKIFNLPSEQAHSPRKYRISPNWFHSISLNHNRNRNLILNDSNTEFQLKFLLRNLTQLRHLSLAYVPIDSVLPSNLSSSSLTILDLSYTRLRGELPHEIFILPNLKTLRLRGNSNVTGVLPQSNLSASNGSCITSLRELDLSLTMLSEVPDVVGSLKSLKSLSPKFCNLSGPIPKFISNLTHLTELYLSINHLQGQIPNGFANLVHLRYFSLGHNKLTIGPFPSWVANLSQLVSLDLSYSSLMGPLPSNITSLQKLTFLSLSSNSLNGTIPSWIFDLPLLEFLDLGFNQLKCQLSEFQFKSNSLVSIY	383	6232	https://onlinelibrary.wiley.com/doi/full/10.1111/pbi.13558
PlantKGA_431	Apiales	Araliaceae	Panax	notoginseng	Panax notoginseng		三七	chromosome	Yes	转录本	Pno06G006062t1	Pno06G006062t11288xxPlantKGA_431	Pno06G006062	L	partial	6	34742017	34748248	+	Pfam	PF13855	Leucine rich repeat	Leucine-rich repeat	249	292	PKFISNLTHLTELYLSINHLQGQIPNGFANLVHLRYFSLGHNKL	1.6e-06	MKAMAGMLSKFGDAMCSSCEMAVVWMQNQLRQNQTQDHILNYVNELCDGLPSPTGQSGVDCAKISFMPSVAFTIGGKIFNLPSEQAHSPRKYRISPNWFHSISLNHNRNRNLILNDSNTEFQLKFLLRNLTQLRHLSLAYVPIDSVLPSNLSSSSLTILDLSYTRLRGELPHEIFILPNLKTLRLRGNSNVTGVLPQSNLSASNGSCITSLRELDLSLTMLSEVPDVVGSLKSLKSLSPKFCNLSGPIPKFISNLTHLTELYLSINHLQGQIPNGFANLVHLRYFSLGHNKLTIGPFPSWVANLSQLVSLDLSYSSLMGPLPSNITSLQKLTFLSLSSNSLNGTIPSWIFDLPLLEFLDLGFNQLKCQLSEFQFKSNSLVSIY	383	6232	https://onlinelibrary.wiley.com/doi/full/10.1111/pbi.13558
PlantKGA_431	Apiales	Araliaceae	Panax	notoginseng	Panax notoginseng		三七	chromosome	Yes	转录本	Pno06G006063t1	Pno06G006063t11288xxPlantKGA_431	Pno06G006063	L	partial	6	34749530	34750701	+	Pfam	PF13516	Leucine Rich repeat	Leucine-rich repeat	148	163	TTLTTIDLSSNKFKGE	1.1	MVVPTIGRLPFGRTKPSRRIRLSYAIQHYYQLRLEVLDLEKNQINDTFPNWLGTLPELHVLVLSFNRFHGPINTTSMTKNPFPKLRIIDLSCNEFTGLLPELFFKYFIAMKYADENTKKAEYLKNSYYQNSVILVMKEVIIELERILTTLTTIDLSSNKFKGEIPDIIGNLKFLRQLNLSHNSLVGRIPSLLGNLSVLESLDLNSNQLVGEISQELANLNFLGKLNLSYNHLRGRIPSGSQFETFLNDSYYGNLALCEFPLSECAKGEIPPVVQQENDSDFLDGFTWEAVLMGYGCGTVLEFIIGYIMFLVEKPKWFTGIVERELGRLQRRRGYRFKQGWIQPVS	345	1172	https://onlinelibrary.wiley.com/doi/full/10.1111/pbi.13558
PlantKGA_431	Apiales	Araliaceae	Panax	notoginseng	Panax notoginseng		三七	chromosome	Yes	转录本	Pno06G006063t1	Pno06G006063t11288xxPlantKGA_431	Pno06G006063	L	partial	6	34749530	34750701	+	Pfam	PF00560	Leucine Rich Repeat	Leucine-rich repeat	174	195	LRQLNLSHNSLVGRIPSLLGNL	1.6	MVVPTIGRLPFGRTKPSRRIRLSYAIQHYYQLRLEVLDLEKNQINDTFPNWLGTLPELHVLVLSFNRFHGPINTTSMTKNPFPKLRIIDLSCNEFTGLLPELFFKYFIAMKYADENTKKAEYLKNSYYQNSVILVMKEVIIELERILTTLTTIDLSSNKFKGEIPDIIGNLKFLRQLNLSHNSLVGRIPSLLGNLSVLESLDLNSNQLVGEISQELANLNFLGKLNLSYNHLRGRIPSGSQFETFLNDSYYGNLALCEFPLSECAKGEIPPVVQQENDSDFLDGFTWEAVLMGYGCGTVLEFIIGYIMFLVEKPKWFTGIVERELGRLQRRRGYRFKQGWIQPVS	345	1172	https://onlinelibrary.wiley.com/doi/full/10.1111/pbi.13558
PlantKGA_431	Apiales	Araliaceae	Panax	notoginseng	Panax notoginseng		三七	chromosome	Yes	转录本	Pno06G006063t1	Pno06G006063t11288xxPlantKGA_431	Pno06G006063	L	partial	6	34749530	34750701	+	Pfam	PF00560	Leucine Rich Repeat	Leucine-rich repeat	84	103	KLRIIDLSCNEFTGLLPELF	1.9	MVVPTIGRLPFGRTKPSRRIRLSYAIQHYYQLRLEVLDLEKNQINDTFPNWLGTLPELHVLVLSFNRFHGPINTTSMTKNPFPKLRIIDLSCNEFTGLLPELFFKYFIAMKYADENTKKAEYLKNSYYQNSVILVMKEVIIELERILTTLTTIDLSSNKFKGEIPDIIGNLKFLRQLNLSHNSLVGRIPSLLGNLSVLESLDLNSNQLVGEISQELANLNFLGKLNLSYNHLRGRIPSGSQFETFLNDSYYGNLALCEFPLSECAKGEIPPVVQQENDSDFLDGFTWEAVLMGYGCGTVLEFIIGYIMFLVEKPKWFTGIVERELGRLQRRRGYRFKQGWIQPVS	345	1172	https://onlinelibrary.wiley.com/doi/full/10.1111/pbi.13558
PlantKGA_431	Apiales	Araliaceae	Panax	notoginseng	Panax notoginseng		三七	chromosome	Yes	转录本	Pno06G006064t1	Pno06G006064t11288xxPlantKGA_431	Pno06G006064	L	partial	6	34751497	34752738	-	Pfam	PF13855	Leucine rich repeat	Leucine-rich repeat	198	257	HLTELYLSINHLQGQISNGFANLVHLRYLSLGHNKLTIGPFPSWVANLSQLVSLDLSYSS	1.3e-07	MKPREFGRFATSLTHLNLSRSNFSCPFPSEISHLSKLVSLDLSRNRIRNRNLILSDSNTEFQPKFLLHNLTQLRHISLAYVPIDSVLPSNLSSSSSLTVLDLSYTRLRGELAHVIFILPNLKILRLRGNSNVTGVLPQSNLSASNGSCIISLRELDLSLTMLSEVPDVVGSLKSLKSLNLKFCNLSGSISKFISNLTHLTELYLSINHLQGQISNGFANLVHLRYLSLGHNKLTIGPFPSWVANLSQLVSLDLSYSSLMGPLPSNITSLQKLTFLSLSSNSLNGTIPSWIFDLPLLEFLDLGFNQLKCQLSEFQFKSNSLVGIYLNDNELSGFVPQSIFQQADLLSLYLGSNKLSGNIEIEMFSSLKKLETLSLSDNNNLSVRLSTTNNTIINTTFPNL…	413	1242	https://onlinelibrary.wiley.com/doi/full/10.1111/pbi.13558
PlantKGA_431	Apiales	Araliaceae	Panax	notoginseng	Panax notoginseng		三七	chromosome	Yes	转录本	Pno06G006065t1	Pno06G006065t11288xxPlantKGA_431	Pno06G006065	L	partial	6	34754616	34755338	-	Pfam	PF08263	Leucine rich repeat N-terminal domain	Leucine-rich repeat-containing N-terminal, plant-type	41	94	DKQILALFQFKPRLSINSSASWGCGEYGNTSPYPKTNQWKIGSDCCKWYGVACN	0.00055	MGKSSVLLPWLTQIHLLIIFLQLHHFVISFSSAHDNLLCSDKQILALFQFKPRLSINSSASWGCGEYGNTSPYPKTNQWKIGSDCCKWYGVACNPLTGDVIGLDLSCSHLVGVLHSNSSLFQLPQL	126	723	https://onlinelibrary.wiley.com/doi/full/10.1111/pbi.13558
PlantKGA_431	Apiales	Araliaceae	Panax	notoginseng	Panax notoginseng		三七	chromosome	Yes	转录本	Pno06G011008t1	Pno06G011008t11288xxPlantKGA_431	Pno06G011008	L	partial	6	6627801	6631793	-	Pfam	PF08263	Leucine rich repeat N-terminal domain	Leucine-rich repeat-containing N-terminal, plant-type	26	64	DFLSLQTIRKSLDDMPGSNYFASWDFTADPCNFAGVYCD	3.1e-07	MGFFLCALLIFLHQSVSVFPMLDPIDFLSLQTIRKSLDDMPGSNYFASWDFTADPCNFAGVYCDSDKVIALNLGDPRAGTPGLTGRLDPAIGKLTSLAEFTVVPGRLMGTLPSSLSQLKNLRFLAVSRNFISGSIPATLDQLRGLQTMDLSYNQLTGSIPWSIGSLPALTNVILGHNRLSGSIPRFTSQSLTRLDLKHNELTGSLTPDALPPSIQYLSLSWNKLSGPVDRLLARMNRLNYLDLSLNKFTGYIPGCLFTFPLSNLQLQRNLFSGPVQPADQVRIPAVDLSFNRLSGQISPLFSTVQTLYLNNNRFMGEVPGTFVDRLLDASIQILYLQHNYLTGMAINPTVEIPLSSSLCLQYNCMVPPVQTPCPLKAGKQKTRPTGQCIEWKKGVN	396	3993	https://onlinelibrary.wiley.com/doi/full/10.1111/pbi.13558
PlantKGA_431	Apiales	Araliaceae	Panax	notoginseng	Panax notoginseng		三七	chromosome	Yes	转录本	Pno06G011008t1	Pno06G011008t11288xxPlantKGA_431	Pno06G011008	L	partial	6	6627801	6631793	-	Pfam	PF13516	Leucine Rich repeat	Leucine-rich repeat	188	203	SQSLTRLDLKHNELTG	0.18	MGFFLCALLIFLHQSVSVFPMLDPIDFLSLQTIRKSLDDMPGSNYFASWDFTADPCNFAGVYCDSDKVIALNLGDPRAGTPGLTGRLDPAIGKLTSLAEFTVVPGRLMGTLPSSLSQLKNLRFLAVSRNFISGSIPATLDQLRGLQTMDLSYNQLTGSIPWSIGSLPALTNVILGHNRLSGSIPRFTSQSLTRLDLKHNELTGSLTPDALPPSIQYLSLSWNKLSGPVDRLLARMNRLNYLDLSLNKFTGYIPGCLFTFPLSNLQLQRNLFSGPVQPADQVRIPAVDLSFNRLSGQISPLFSTVQTLYLNNNRFMGEVPGTFVDRLLDASIQILYLQHNYLTGMAINPTVEIPLSSSLCLQYNCMVPPVQTPCPLKAGKQKTRPTGQCIEWKKGVN	396	3993	https://onlinelibrary.wiley.com/doi/full/10.1111/pbi.13558
PlantKGA_431	Apiales	Araliaceae	Panax	notoginseng	Panax notoginseng		三七	chromosome	Yes	转录本	Pno06G011008t1	Pno06G011008t11288xxPlantKGA_431	Pno06G011008	L	partial	6	6627801	6631793	-	Pfam	PF13855	Leucine rich repeat	Leucine-rich repeat	120	179	NLRFLAVSRNFISGSIPATLDQLRGLQTMDLSYNQLTGSIPWSIGSLPALTNVILGHNRL	1.8e-07	MGFFLCALLIFLHQSVSVFPMLDPIDFLSLQTIRKSLDDMPGSNYFASWDFTADPCNFAGVYCDSDKVIALNLGDPRAGTPGLTGRLDPAIGKLTSLAEFTVVPGRLMGTLPSSLSQLKNLRFLAVSRNFISGSIPATLDQLRGLQTMDLSYNQLTGSIPWSIGSLPALTNVILGHNRLSGSIPRFTSQSLTRLDLKHNELTGSLTPDALPPSIQYLSLSWNKLSGPVDRLLARMNRLNYLDLSLNKFTGYIPGCLFTFPLSNLQLQRNLFSGPVQPADQVRIPAVDLSFNRLSGQISPLFSTVQTLYLNNNRFMGEVPGTFVDRLLDASIQILYLQHNYLTGMAINPTVEIPLSSSLCLQYNCMVPPVQTPCPLKAGKQKTRPTGQCIEWKKGVN	396	3993	https://onlinelibrary.wiley.com/doi/full/10.1111/pbi.13558
PlantKGA_431	Apiales	Araliaceae	Panax	notoginseng	Panax notoginseng		三七	chromosome	Yes	转录本	Pno06G012154t2	Pno06G012154t21288xxPlantKGA_431	Pno06G012154	L	partial	6	7313293	7316995	-	Pfam	PF13516	Leucine Rich repeat	Leucine-rich repeat	214	232	LRYLNLSNNALGEKGVRAF	0.2	MDSAAQNRSISIKLWPPSQSTRLMLVERMTKNLTTPSILSRKYGLLSKEEAEENAKKIESLAYVSANQHFEKEPDGDGSSAVQLYAKESSKLMLEAVKKGPKSKEDGEVNISDEVTASLETVFDISGGRRAFIDAEEAEELFKPLRVPGSKYRKICFSNRSFGLDAARVAEAVLSSLKDQLTEVDLSDFIAGRPEAEALEVMKIFSSVLDGCELRYLNLSNNALGEKGVRAFGSLLKSQRNLEELYLMNDGISEEAARAVCELIPSTERLKVLQFHNNMTGDEGAIAISELVKHSPVLEDFRCSSTRVDSEGGVALAEALGTCTHLKKLDLRDNMFGVEAGVALSKALPGFANLTEVYLSYLNLEDEGSIALANALKVYAPSLEVLEMAGNDITAKAAP…	536	3703	https://onlinelibrary.wiley.com/doi/full/10.1111/pbi.13558
PlantKGA_431	Apiales	Araliaceae	Panax	notoginseng	Panax notoginseng		三七	chromosome	Yes	转录本	Pno06G012154t2	Pno06G012154t21288xxPlantKGA_431	Pno06G012154	L	partial	6	7313293	7316995	-	Pfam	PF13516	Leucine Rich repeat	Leucine-rich repeat	409	430	HSLTKLNLSENELKDEGAILIA	0.0024	MDSAAQNRSISIKLWPPSQSTRLMLVERMTKNLTTPSILSRKYGLLSKEEAEENAKKIESLAYVSANQHFEKEPDGDGSSAVQLYAKESSKLMLEAVKKGPKSKEDGEVNISDEVTASLETVFDISGGRRAFIDAEEAEELFKPLRVPGSKYRKICFSNRSFGLDAARVAEAVLSSLKDQLTEVDLSDFIAGRPEAEALEVMKIFSSVLDGCELRYLNLSNNALGEKGVRAFGSLLKSQRNLEELYLMNDGISEEAARAVCELIPSTERLKVLQFHNNMTGDEGAIAISELVKHSPVLEDFRCSSTRVDSEGGVALAEALGTCTHLKKLDLRDNMFGVEAGVALSKALPGFANLTEVYLSYLNLEDEGSIALANALKVYAPSLEVLEMAGNDITAKAAP…	536	3703	https://onlinelibrary.wiley.com/doi/full/10.1111/pbi.13558
PlantKGA_431	Apiales	Araliaceae	Panax	notoginseng	Panax notoginseng		三七	chromosome	Yes	转录本	Pno06G012154t2	Pno06G012154t21288xxPlantKGA_431	Pno06G012154	L	partial	6	7313293	7316995	-	Pfam	PF13516	Leucine Rich repeat	Leucine-rich repeat	322	345	TCTHLKKLDLRDNMFGVEAGVALS	0.058	MDSAAQNRSISIKLWPPSQSTRLMLVERMTKNLTTPSILSRKYGLLSKEEAEENAKKIESLAYVSANQHFEKEPDGDGSSAVQLYAKESSKLMLEAVKKGPKSKEDGEVNISDEVTASLETVFDISGGRRAFIDAEEAEELFKPLRVPGSKYRKICFSNRSFGLDAARVAEAVLSSLKDQLTEVDLSDFIAGRPEAEALEVMKIFSSVLDGCELRYLNLSNNALGEKGVRAFGSLLKSQRNLEELYLMNDGISEEAARAVCELIPSTERLKVLQFHNNMTGDEGAIAISELVKHSPVLEDFRCSSTRVDSEGGVALAEALGTCTHLKKLDLRDNMFGVEAGVALSKALPGFANLTEVYLSYLNLEDEGSIALANALKVYAPSLEVLEMAGNDITAKAAP…	536	3703	https://onlinelibrary.wiley.com/doi/full/10.1111/pbi.13558
PlantKGA_431	Apiales	Araliaceae	Panax	notoginseng	Panax notoginseng		三七	chromosome	Yes	转录本	Pno06G015047t2	Pno06G015047t21288xxPlantKGA_431	Pno06G015047	L	partial	6	90719951	90727293	+	Pfam	PF13516	Leucine Rich repeat	Leucine-rich repeat	65	84	LISLDLGFNEIRDEGAFSIS	0.0024	MAKTRGGHTFKWSAPCLGSSVEFIKRSKSLLWLNVYMNDIGDELQVFLQGAICLARSLKVINEVLISLDLGFNEIRDEGAFSISQALKANEDVRLTSLNLASNFLTKLGLVCMAEDCMDAFVPSPERKRKMPLFVFFRDARQVFSDNMGKKSEPSITKCKETENWTKVSFKPDLENFKMTHLEDDVVALMKKRVIDIAGCLGKTVKVSFVNSIATTKGGTHVDYITNQITTHIMHIKKTTQVGPPKRSAQGHKALRRSTGGNRSFKFRAVAAAADDDDIF	280	7343	https://onlinelibrary.wiley.com/doi/full/10.1111/pbi.13558
PlantKGA_431	Apiales	Araliaceae	Panax	notoginseng	Panax notoginseng		三七	chromosome	Yes	转录本	Pno07G002570t1	Pno07G002570t11288xxPlantKGA_431	Pno07G002570	L	partial	7	158642583	158648974	-	Pfam	PF13516	Leucine Rich repeat	Leucine-rich repeat	558	577	HSRNLLQINLSCCGITDVGL	0.025	MEYFSDILSLLTDDLLAIILTKLDDDSDLKSFRAVCKSFHRVELTHKTSLRVLRTEFLPSLLRNYTNVDTLDLSVCPRIDDVTVAALLCGTSELDWTRRLKRLVLSRSAGLSSSGLEMLVRSCTRLEAVDLSYCCGFGDREAAALSCAVGLRELRMDKCLGVSDVGLAKIAVGCEKLERVSVKWCLEISDLGLDLLSKKCFYLKHLDISYMKVTSESLRSISTMQKLEVLVMVGCGLVDDVGLHYLENGCPSLQVIDVSRCEKVSSSGLISVINGRNGLLQLSAGYYFFELSSTVLYLFKNLNNLKTFRVDGARLSDSALQIIGINCRSLVDLRFSKCKGVTDTGIMQLVSGCTKLKIFDLTCCNALTDKAISAIAKSCGNLVCLKLESCNLLTNKSLD…	645	6392	https://onlinelibrary.wiley.com/doi/full/10.1111/pbi.13558
PlantKGA_431	Apiales	Araliaceae	Panax	notoginseng	Panax notoginseng		三七	chromosome	Yes	转录本	Pno07G002570t1	Pno07G002570t11288xxPlantKGA_431	Pno07G002570	L	partial	7	158642583	158648974	-	Pfam	PF13516	Leucine Rich repeat	Leucine-rich repeat	458	479	KICELDLYRCKGIGDDGLAALA	0.76	MEYFSDILSLLTDDLLAIILTKLDDDSDLKSFRAVCKSFHRVELTHKTSLRVLRTEFLPSLLRNYTNVDTLDLSVCPRIDDVTVAALLCGTSELDWTRRLKRLVLSRSAGLSSSGLEMLVRSCTRLEAVDLSYCCGFGDREAAALSCAVGLRELRMDKCLGVSDVGLAKIAVGCEKLERVSVKWCLEISDLGLDLLSKKCFYLKHLDISYMKVTSESLRSISTMQKLEVLVMVGCGLVDDVGLHYLENGCPSLQVIDVSRCEKVSSSGLISVINGRNGLLQLSAGYYFFELSSTVLYLFKNLNNLKTFRVDGARLSDSALQIIGINCRSLVDLRFSKCKGVTDTGIMQLVSGCTKLKIFDLTCCNALTDKAISAIAKSCGNLVCLKLESCNLLTNKSLD…	645	6392	https://onlinelibrary.wiley.com/doi/full/10.1111/pbi.13558
PlantKGA_431	Apiales	Araliaceae	Panax	notoginseng	Panax notoginseng		三七	chromosome	Yes	转录本	Pno07G002570t1	Pno07G002570t11288xxPlantKGA_431	Pno07G002570	L	partial	7	158642583	158648974	-	Pfam	PF13516	Leucine Rich repeat	Leucine-rich repeat	353	376	CTKLKIFDLTCCNALTDKAISAIA	0.022	MEYFSDILSLLTDDLLAIILTKLDDDSDLKSFRAVCKSFHRVELTHKTSLRVLRTEFLPSLLRNYTNVDTLDLSVCPRIDDVTVAALLCGTSELDWTRRLKRLVLSRSAGLSSSGLEMLVRSCTRLEAVDLSYCCGFGDREAAALSCAVGLRELRMDKCLGVSDVGLAKIAVGCEKLERVSVKWCLEISDLGLDLLSKKCFYLKHLDISYMKVTSESLRSISTMQKLEVLVMVGCGLVDDVGLHYLENGCPSLQVIDVSRCEKVSSSGLISVINGRNGLLQLSAGYYFFELSSTVLYLFKNLNNLKTFRVDGARLSDSALQIIGINCRSLVDLRFSKCKGVTDTGIMQLVSGCTKLKIFDLTCCNALTDKAISAIAKSCGNLVCLKLESCNLLTNKSLD…	645	6392	https://onlinelibrary.wiley.com/doi/full/10.1111/pbi.13558
PlantKGA_431	Apiales	Araliaceae	Panax	notoginseng	Panax notoginseng		三七	chromosome	Yes	转录本	Pno07G002570t1	Pno07G002570t11288xxPlantKGA_431	Pno07G002570	L	partial	7	158642583	158648974	-	Pfam	PF13516	Leucine Rich repeat	Leucine-rich repeat	433	453	LICLKLGHCTNISDKGLSYIA	1.3	MEYFSDILSLLTDDLLAIILTKLDDDSDLKSFRAVCKSFHRVELTHKTSLRVLRTEFLPSLLRNYTNVDTLDLSVCPRIDDVTVAALLCGTSELDWTRRLKRLVLSRSAGLSSSGLEMLVRSCTRLEAVDLSYCCGFGDREAAALSCAVGLRELRMDKCLGVSDVGLAKIAVGCEKLERVSVKWCLEISDLGLDLLSKKCFYLKHLDISYMKVTSESLRSISTMQKLEVLVMVGCGLVDDVGLHYLENGCPSLQVIDVSRCEKVSSSGLISVINGRNGLLQLSAGYYFFELSSTVLYLFKNLNNLKTFRVDGARLSDSALQIIGINCRSLVDLRFSKCKGVTDTGIMQLVSGCTKLKIFDLTCCNALTDKAISAIAKSCGNLVCLKLESCNLLTNKSLD…	645	6392	https://onlinelibrary.wiley.com/doi/full/10.1111/pbi.13558
PlantKGA_431	Apiales	Araliaceae	Panax	notoginseng	Panax notoginseng		三七	chromosome	Yes	转录本	Pno07G002570t1	Pno07G002570t11288xxPlantKGA_431	Pno07G002570	L	partial	7	158642583	158648974	-	Pfam	PF13516	Leucine Rich repeat	Leucine-rich repeat	482	504	CRKLKKLNLSYCSKITDRGIECL	0.0017	MEYFSDILSLLTDDLLAIILTKLDDDSDLKSFRAVCKSFHRVELTHKTSLRVLRTEFLPSLLRNYTNVDTLDLSVCPRIDDVTVAALLCGTSELDWTRRLKRLVLSRSAGLSSSGLEMLVRSCTRLEAVDLSYCCGFGDREAAALSCAVGLRELRMDKCLGVSDVGLAKIAVGCEKLERVSVKWCLEISDLGLDLLSKKCFYLKHLDISYMKVTSESLRSISTMQKLEVLVMVGCGLVDDVGLHYLENGCPSLQVIDVSRCEKVSSSGLISVINGRNGLLQLSAGYYFFELSSTVLYLFKNLNNLKTFRVDGARLSDSALQIIGINCRSLVDLRFSKCKGVTDTGIMQLVSGCTKLKIFDLTCCNALTDKAISAIAKSCGNLVCLKLESCNLLTNKSLD…	645	6392	https://onlinelibrary.wiley.com/doi/full/10.1111/pbi.13558
PlantKGA_431	Apiales	Araliaceae	Panax	notoginseng	Panax notoginseng		三七	chromosome	Yes	转录本	Pno07G002956t1	Pno07G002956t11288xxPlantKGA_431	Pno07G002956	L	partial	7	165889645	165891248	+	Pfam	PF13855	Leucine rich repeat	Leucine-rich repeat	34	92	LVELSLGCGNLSDASFPKDFSNLPFLECLDLRGNLIRSLPDCIRTLNRLKELRLSHCPL	4.4e-07	MESLKEIYADRTRNIALIPLISREVQQWDLPGCLVELSLGCGNLSDASFPKDFSNLPFLECLDLRGNLIRSLPDCIRTLNRLKELRLSHCPLLQSVEGLPSTVQDLCVSHSKSLEIIKRTSNLLHINSRGCVNLVEVEGYYKLVGIENVDKRIIKNLGLLEFQVDDKVVEKIKVRYGYGVFSTIIPGEELVESWFDYIDRSRSSSVFFTVPDNSSSSKKRRIRGLNVCIAYHLHDSYYRYDGCTISNWTKELRWIYYWRPFVVGNKQGVGKDGFIWWKKDGKYEDGIIMLSHWRLGTLLEVGDHLAVDFVSSGTFIKEKGFDTRGSFIKEIGLKVVYEDEDEDEDEDEDEGEGEGEDERKEGTTSRLYSFNKYHTNKKKKDIVTLSWNEEERNSYKHLS…	422	1604	https://onlinelibrary.wiley.com/doi/full/10.1111/pbi.13558
PlantKGA_431	Apiales	Araliaceae	Panax	notoginseng	Panax notoginseng		三七	chromosome	Yes	转录本	Pno07G003434t1	Pno07G003434t11288xxPlantKGA_431	Pno07G003434	L	partial	7	172385637	172387820	-	Pfam	PF13855	Leucine rich repeat	Leucine-rich repeat	112	151	GNLKNLISMDLYGNKFEGKIPKSFTKLKSLRFLRLNDNKL	1.5e-06	MAAAISLHFFLLPILLSLTSTLCTNSEGNALHALRSKLSDPTNVLQSWDPTLVNPCTWFHVTCDSNNHVIRLDLGNSNFSGSLGSELGELKHLQYLELYQNNIGGKIPKELGNLKNLISMDLYGNKFEGKIPKSFTKLKSLRFLRLNDNKLSGPIPRKFVTLSNLKVFDISNNNLCGTIPVDGPFGNFPMESFENNRLNGPELKGLVPYDFGC	213	2184	https://onlinelibrary.wiley.com/doi/full/10.1111/pbi.13558
PlantKGA_431	Apiales	Araliaceae	Panax	notoginseng	Panax notoginseng		三七	chromosome	Yes	转录本	Pno07G003434t1	Pno07G003434t11288xxPlantKGA_431	Pno07G003434	L	partial	7	172385637	172387820	-	Pfam	PF08263	Leucine rich repeat N-terminal domain	Leucine-rich repeat-containing N-terminal, plant-type	25	64	NSEGNALHALRSKLSDPTNVLQSWDPTLVNPCTWFHVTCD	3.2e-10	MAAAISLHFFLLPILLSLTSTLCTNSEGNALHALRSKLSDPTNVLQSWDPTLVNPCTWFHVTCDSNNHVIRLDLGNSNFSGSLGSELGELKHLQYLELYQNNIGGKIPKELGNLKNLISMDLYGNKFEGKIPKSFTKLKSLRFLRLNDNKLSGPIPRKFVTLSNLKVFDISNNNLCGTIPVDGPFGNFPMESFENNRLNGPELKGLVPYDFGC	213	2184	https://onlinelibrary.wiley.com/doi/full/10.1111/pbi.13558
PlantKGA_431	Apiales	Araliaceae	Panax	notoginseng	Panax notoginseng		三七	chromosome	Yes	转录本	Pno07G003434t1	Pno07G003434t11288xxPlantKGA_431	Pno07G003434	L	partial	7	172385637	172387820	-	Pfam	PF00560	Leucine Rich Repeat	Leucine-rich repeat	164	186	NLKVFDISNNNLCGTIPVDGPFG	1.2	MAAAISLHFFLLPILLSLTSTLCTNSEGNALHALRSKLSDPTNVLQSWDPTLVNPCTWFHVTCDSNNHVIRLDLGNSNFSGSLGSELGELKHLQYLELYQNNIGGKIPKELGNLKNLISMDLYGNKFEGKIPKSFTKLKSLRFLRLNDNKLSGPIPRKFVTLSNLKVFDISNNNLCGTIPVDGPFGNFPMESFENNRLNGPELKGLVPYDFGC	213	2184	https://onlinelibrary.wiley.com/doi/full/10.1111/pbi.13558
PlantKGA_431	Apiales	Araliaceae	Panax	notoginseng	Panax notoginseng		三七	chromosome	Yes	转录本	Pno07G003479t1	Pno07G003479t11288xxPlantKGA_431	Pno07G003479	L	partial	7	172903640	172905299	-	Pfam	PF08263	Leucine rich repeat N-terminal domain	Leucine-rich repeat-containing N-terminal, plant-type	28	63	SSDISALQAFKASIKPTTIPSYSCLASWRFSSDPCS	3.5e-05	MSMSTFFIFLLYLTLSSLISTTSALTLSSDISALQAFKASIKPTTIPSYSCLASWRFSSDPCSIPHINHFTCGLSCSNSRVTQLTLDPAGYSGTLSPLVSKLTQLIHLDLSKNNFFGPIPTSLSSLSNLQSLTLRFNSFSGSVPPSISALKSLTSLDLSHNSISGNLPNTLNSLTSLSRLDLSFNKLTGSIPKLPPNLLQLAIKTNSLSGYLFESSFTESARLETVELSENSLTGVLQPWFFLLPSLQQVNLSKNKFTRVEISIPNNLESNLVAVDLGFNKLQGNLPINFPAYPSLSSLTLSYNRLRGPIPLEYSKMETLRRLFLDGNFLNGSPPKVFFSGETAVSGSLGDNCLQSCPVSSQLCSKSQKASWICRQAYGKPRS	383	1660	https://onlinelibrary.wiley.com/doi/full/10.1111/pbi.13558
PlantKGA_431	Apiales	Araliaceae	Panax	notoginseng	Panax notoginseng		三七	chromosome	Yes	转录本	Pno07G003479t1	Pno07G003479t11288xxPlantKGA_431	Pno07G003479	L	partial	7	172903640	172905299	-	Pfam	PF13855	Leucine rich repeat	Leucine-rich repeat	128	187	NLQSLTLRFNSFSGSVPPSISALKSLTSLDLSHNSISGNLPNTLNSLTSLSRLDLSFNKL	8.7e-08	MSMSTFFIFLLYLTLSSLISTTSALTLSSDISALQAFKASIKPTTIPSYSCLASWRFSSDPCSIPHINHFTCGLSCSNSRVTQLTLDPAGYSGTLSPLVSKLTQLIHLDLSKNNFFGPIPTSLSSLSNLQSLTLRFNSFSGSVPPSISALKSLTSLDLSHNSISGNLPNTLNSLTSLSRLDLSFNKLTGSIPKLPPNLLQLAIKTNSLSGYLFESSFTESARLETVELSENSLTGVLQPWFFLLPSLQQVNLSKNKFTRVEISIPNNLESNLVAVDLGFNKLQGNLPINFPAYPSLSSLTLSYNRLRGPIPLEYSKMETLRRLFLDGNFLNGSPPKVFFSGETAVSGSLGDNCLQSCPVSSQLCSKSQKASWICRQAYGKPRS	383	1660	https://onlinelibrary.wiley.com/doi/full/10.1111/pbi.13558
PlantKGA_431	Apiales	Araliaceae	Panax	notoginseng	Panax notoginseng		三七	chromosome	Yes	转录本	Pno07G003479t1	Pno07G003479t11288xxPlantKGA_431	Pno07G003479	L	partial	7	172903640	172905299	-	Pfam	PF00560	Leucine Rich Repeat	Leucine-rich repeat	105	126	LIHLDLSKNNFFGPIPTSLSSL	0.37	MSMSTFFIFLLYLTLSSLISTTSALTLSSDISALQAFKASIKPTTIPSYSCLASWRFSSDPCSIPHINHFTCGLSCSNSRVTQLTLDPAGYSGTLSPLVSKLTQLIHLDLSKNNFFGPIPTSLSSLSNLQSLTLRFNSFSGSVPPSISALKSLTSLDLSHNSISGNLPNTLNSLTSLSRLDLSFNKLTGSIPKLPPNLLQLAIKTNSLSGYLFESSFTESARLETVELSENSLTGVLQPWFFLLPSLQQVNLSKNKFTRVEISIPNNLESNLVAVDLGFNKLQGNLPINFPAYPSLSSLTLSYNRLRGPIPLEYSKMETLRRLFLDGNFLNGSPPKVFFSGETAVSGSLGDNCLQSCPVSSQLCSKSQKASWICRQAYGKPRS	383	1660	https://onlinelibrary.wiley.com/doi/full/10.1111/pbi.13558
PlantKGA_431	Apiales	Araliaceae	Panax	notoginseng	Panax notoginseng		三七	chromosome	Yes	转录本	Pno07G003562t1	Pno07G003562t11288xxPlantKGA_431	Pno07G003562	L	partial	7	173843561	173845951	-	Pfam	PF08263	Leucine rich repeat N-terminal domain	Leucine-rich repeat-containing N-terminal, plant-type	41	79	ESEKTSLLQFRQGLIDESNILSSWVGDHDCCTWYGVGCS	4.5e-10	MAAGTPDNSIYYYVLVIMFFAFPFMQRLEFVSGTTNVSCLESEKTSLLQFRQGLIDESNILSSWVGDHDCCTWYGVGCSRVTGNVLKLNLTSPYGIHCYSGYNTSHCLKGEINTSLQNLKFLTYLDLSMNNFSGIQIPDFFGSLKNLEYLDLSYSNVAGKVPHYFGNLSRLQHLDLRWNKFSGSIPSGISNLTQLRKLDLSHNSLTGNLPPSLERLTSLKEFDISFNQLSGVFPAWIGQLSELEKLDLVENSLAGIISENDLVNLTRLRDLGLSNVILNFSSIWTPPFQLQSLSLFSCKVGSQFPQWLRNQRQIEFLIIYDGRISDTIPNWFQNLYSRIKGKILSIPSNLMYLDLSNNLLSGKIILSIPSNLLVLSLSNNLFSGLVVANNDTTIQIWSL…	759	2391	https://onlinelibrary.wiley.com/doi/full/10.1111/pbi.13558
PlantKGA_431	Apiales	Araliaceae	Panax	notoginseng	Panax notoginseng		三七	chromosome	Yes	转录本	Pno07G003562t1	Pno07G003562t11288xxPlantKGA_431	Pno07G003562	L	partial	7	173843561	173845951	-	Pfam	PF13855	Leucine rich repeat	Leucine-rich repeat	122	181	LTYLDLSMNNFSGIQIPDFFGSLKNLEYLDLSYSNVAGKVPHYFGNLSRLQHLDLRWNKF	3.1e-10	MAAGTPDNSIYYYVLVIMFFAFPFMQRLEFVSGTTNVSCLESEKTSLLQFRQGLIDESNILSSWVGDHDCCTWYGVGCSRVTGNVLKLNLTSPYGIHCYSGYNTSHCLKGEINTSLQNLKFLTYLDLSMNNFSGIQIPDFFGSLKNLEYLDLSYSNVAGKVPHYFGNLSRLQHLDLRWNKFSGSIPSGISNLTQLRKLDLSHNSLTGNLPPSLERLTSLKEFDISFNQLSGVFPAWIGQLSELEKLDLVENSLAGIISENDLVNLTRLRDLGLSNVILNFSSIWTPPFQLQSLSLFSCKVGSQFPQWLRNQRQIEFLIIYDGRISDTIPNWFQNLYSRIKGKILSIPSNLMYLDLSNNLLSGKIILSIPSNLLVLSLSNNLFSGLVVANNDTTIQIWSL…	759	2391	https://onlinelibrary.wiley.com/doi/full/10.1111/pbi.13558
PlantKGA_431	Apiales	Araliaceae	Panax	notoginseng	Panax notoginseng		三七	chromosome	Yes	转录本	Pno07G003562t1	Pno07G003562t11288xxPlantKGA_431	Pno07G003562	L	partial	7	173843561	173845951	-	Pfam	PF13855	Leucine rich repeat	Leucine-rich repeat	218	275	SLKEFDISFNQLSGVFPAWIGQLSELEKLDLVENSLAGIISENDLVNLTRLRDLGLSN	2e-08	MAAGTPDNSIYYYVLVIMFFAFPFMQRLEFVSGTTNVSCLESEKTSLLQFRQGLIDESNILSSWVGDHDCCTWYGVGCSRVTGNVLKLNLTSPYGIHCYSGYNTSHCLKGEINTSLQNLKFLTYLDLSMNNFSGIQIPDFFGSLKNLEYLDLSYSNVAGKVPHYFGNLSRLQHLDLRWNKFSGSIPSGISNLTQLRKLDLSHNSLTGNLPPSLERLTSLKEFDISFNQLSGVFPAWIGQLSELEKLDLVENSLAGIISENDLVNLTRLRDLGLSNVILNFSSIWTPPFQLQSLSLFSCKVGSQFPQWLRNQRQIEFLIIYDGRISDTIPNWFQNLYSRIKGKILSIPSNLMYLDLSNNLLSGKIILSIPSNLLVLSLSNNLFSGLVVANNDTTIQIWSL…	759	2391	https://onlinelibrary.wiley.com/doi/full/10.1111/pbi.13558
PlantKGA_431	Apiales	Araliaceae	Panax	notoginseng	Panax notoginseng		三七	chromosome	Yes	转录本	Pno07G003562t1	Pno07G003562t11288xxPlantKGA_431	Pno07G003562	L	partial	7	173843561	173845951	-	Pfam	PF13855	Leucine rich repeat	Leucine-rich repeat	446	504	NLNILDVTNNTLSGLIPPSLGSLQSLKYLHLHNNKFHGKLPSSFQHLTNLVTLDLAQNA	3e-09	MAAGTPDNSIYYYVLVIMFFAFPFMQRLEFVSGTTNVSCLESEKTSLLQFRQGLIDESNILSSWVGDHDCCTWYGVGCSRVTGNVLKLNLTSPYGIHCYSGYNTSHCLKGEINTSLQNLKFLTYLDLSMNNFSGIQIPDFFGSLKNLEYLDLSYSNVAGKVPHYFGNLSRLQHLDLRWNKFSGSIPSGISNLTQLRKLDLSHNSLTGNLPPSLERLTSLKEFDISFNQLSGVFPAWIGQLSELEKLDLVENSLAGIISENDLVNLTRLRDLGLSNVILNFSSIWTPPFQLQSLSLFSCKVGSQFPQWLRNQRQIEFLIIYDGRISDTIPNWFQNLYSRIKGKILSIPSNLMYLDLSNNLLSGKIILSIPSNLLVLSLSNNLFSGLVVANNDTTIQIWSL…	759	2391	https://onlinelibrary.wiley.com/doi/full/10.1111/pbi.13558
PlantKGA_431	Apiales	Araliaceae	Panax	notoginseng	Panax notoginseng		三七	chromosome	Yes	转录本	Pno07G003562t1	Pno07G003562t11288xxPlantKGA_431	Pno07G003562	L	partial	7	173843561	173845951	-	Pfam	PF00560	Leucine Rich Repeat	Leucine-rich repeat	194	216	QLRKLDLSHNSLTGNLPPSLERL	0.042	MAAGTPDNSIYYYVLVIMFFAFPFMQRLEFVSGTTNVSCLESEKTSLLQFRQGLIDESNILSSWVGDHDCCTWYGVGCSRVTGNVLKLNLTSPYGIHCYSGYNTSHCLKGEINTSLQNLKFLTYLDLSMNNFSGIQIPDFFGSLKNLEYLDLSYSNVAGKVPHYFGNLSRLQHLDLRWNKFSGSIPSGISNLTQLRKLDLSHNSLTGNLPPSLERLTSLKEFDISFNQLSGVFPAWIGQLSELEKLDLVENSLAGIISENDLVNLTRLRDLGLSNVILNFSSIWTPPFQLQSLSLFSCKVGSQFPQWLRNQRQIEFLIIYDGRISDTIPNWFQNLYSRIKGKILSIPSNLMYLDLSNNLLSGKIILSIPSNLLVLSLSNNLFSGLVVANNDTTIQIWSL…	759	2391	https://onlinelibrary.wiley.com/doi/full/10.1111/pbi.13558
PlantKGA_431	Apiales	Araliaceae	Panax	notoginseng	Panax notoginseng		三七	chromosome	Yes	转录本	Pno07G003574t1	Pno07G003574t11288xxPlantKGA_431	Pno07G003574	L	partial	7	173952882	173954952	-	Pfam	PF13855	Leucine rich repeat	Leucine-rich repeat	129	184	FHINSNRFCGIIPEEFSKLTILRELDVSNNRFVGGFPEVVLGLPALVYLDLRYNDF	1.7e-07	MAFPTNTIMKALGCFLLLSLLSLSSATPNKDDVPEGFEYEVDVRVTFANSRLKRAYIALQSWKKAIFSDPKNMTGNWVGANVCAYTGIFCEKALDDPNLTVVASVDLNDGDIAGHLVPQLGLLTDIAVFHINSNRFCGIIPEEFSKLTILRELDVSNNRFVGGFPEVVLGLPALVYLDLRYNDFEGPLPSELFDKPLDALILNNNRFSSNIPENLGSSTVSVAVLANNFFSGCMPKSIGKMAKTVNELIFLNNNLTGCLPEEIGLLTNLNVFDISCNNFIGTLPKGLSGLKQINTLDIGHNKLAGQVLDSICELPSLENFTYSFNFFEEEMKSCQAPRHGLTLDSIQNCLPDEPNQKSVEECLPVVSKPVDCEAVGCRGNPGKEKPLEYSPPTPETPKT…	677	2071	https://onlinelibrary.wiley.com/doi/full/10.1111/pbi.13558
PlantKGA_431	Apiales	Araliaceae	Panax	notoginseng	Panax notoginseng		三七	chromosome	Yes	转录本	Pno07G003580t4	Pno07G003580t41288xxPlantKGA_431	Pno07G003580	L	partial	7	173979647	173982830	+	Pfam	PF08263	Leucine rich repeat N-terminal domain	Leucine-rich repeat-containing N-terminal, plant-type	44	81	ESEKKALLQFRRSLIDESNMLSSWVGDDCCTWYGVGCS	2.3e-10	MAGTCNTRIIYVLVVMFFAFPFMQRLEFVRGNEILGYPNVSCLESEKKALLQFRRSLIDESNMLSSWVGDDCCTWYGVGCSRVTGHVLKLNLRSPYETGCYSGYNSSHCLKGEINASLQNLKFLTYLDLSMNNFSGIQIPEFFGSLKDLEYLDLSNLNIGGKVPHYLGNLSRLQYLNLGGNMFNGSIPSEMSNLTQLTLLDLGYNQLTENLPPSLERLTSLKYLDISSNRLSGVFPAWIGQLSELQTLYMDRNSMAGIISENHFANLTRLINLRLAGNWDLILNFSSTWTPPFQLGGVDLSSCKVGPQFPQWLRNQRRIEYLLISNGSISDTIPDWFKNLYPRITILDLSYNQIKGNRFERMTLSSGVERLYLNDNQLTGKLILPVPSNLMILDLSNNL…	843	3184	https://onlinelibrary.wiley.com/doi/full/10.1111/pbi.13558
PlantKGA_431	Apiales	Araliaceae	Panax	notoginseng	Panax notoginseng		三七	chromosome	Yes	转录本	Pno07G003580t4	Pno07G003580t41288xxPlantKGA_431	Pno07G003580	L	partial	7	173979647	173982830	+	Pfam	PF13855	Leucine rich repeat	Leucine-rich repeat	124	182	LTYLDLSMNNFSGIQIPEFFGSLKDLEYLDLSNLNIGGKVPHYLGNLSRLQYLNLGGNM	6.5e-08	MAGTCNTRIIYVLVVMFFAFPFMQRLEFVRGNEILGYPNVSCLESEKKALLQFRRSLIDESNMLSSWVGDDCCTWYGVGCSRVTGHVLKLNLRSPYETGCYSGYNSSHCLKGEINASLQNLKFLTYLDLSMNNFSGIQIPEFFGSLKDLEYLDLSNLNIGGKVPHYLGNLSRLQYLNLGGNMFNGSIPSEMSNLTQLTLLDLGYNQLTENLPPSLERLTSLKYLDISSNRLSGVFPAWIGQLSELQTLYMDRNSMAGIISENHFANLTRLINLRLAGNWDLILNFSSTWTPPFQLGGVDLSSCKVGPQFPQWLRNQRRIEYLLISNGSISDTIPDWFKNLYPRITILDLSYNQIKGNRFERMTLSSGVERLYLNDNQLTGKLILPVPSNLMILDLSNNL…	843	3184	https://onlinelibrary.wiley.com/doi/full/10.1111/pbi.13558
PlantKGA_431	Apiales	Araliaceae	Panax	notoginseng	Panax notoginseng		三七	chromosome	Yes	转录本	Pno07G003580t4	Pno07G003580t41288xxPlantKGA_431	Pno07G003580	L	partial	7	173979647	173982830	+	Pfam	PF13855	Leucine rich repeat	Leucine-rich repeat	491	551	QLSSLHLHNNKFHGKLPSSFQHLTNLVTLDLAQNAFTHVIPPWIGQSLSKLRILTLRSNKF	3.2e-08	MAGTCNTRIIYVLVVMFFAFPFMQRLEFVRGNEILGYPNVSCLESEKKALLQFRRSLIDESNMLSSWVGDDCCTWYGVGCSRVTGHVLKLNLRSPYETGCYSGYNSSHCLKGEINASLQNLKFLTYLDLSMNNFSGIQIPEFFGSLKDLEYLDLSNLNIGGKVPHYLGNLSRLQYLNLGGNMFNGSIPSEMSNLTQLTLLDLGYNQLTENLPPSLERLTSLKYLDISSNRLSGVFPAWIGQLSELQTLYMDRNSMAGIISENHFANLTRLINLRLAGNWDLILNFSSTWTPPFQLGGVDLSSCKVGPQFPQWLRNQRRIEYLLISNGSISDTIPDWFKNLYPRITILDLSYNQIKGNRFERMTLSSGVERLYLNDNQLTGKLILPVPSNLMILDLSNNL…	843	3184	https://onlinelibrary.wiley.com/doi/full/10.1111/pbi.13558
PlantKGA_431	Apiales	Araliaceae	Panax	notoginseng	Panax notoginseng		三七	chromosome	Yes	转录本	Pno07G003580t4	Pno07G003580t41288xxPlantKGA_431	Pno07G003580	L	partial	7	173979647	173982830	+	Pfam	PF13855	Leucine rich repeat	Leucine-rich repeat	220	278	SLKYLDISSNRLSGVFPAWIGQLSELQTLYMDRNSMAGIISENHFANLTRLINLRLAGN	4.7e-09	MAGTCNTRIIYVLVVMFFAFPFMQRLEFVRGNEILGYPNVSCLESEKKALLQFRRSLIDESNMLSSWVGDDCCTWYGVGCSRVTGHVLKLNLRSPYETGCYSGYNSSHCLKGEINASLQNLKFLTYLDLSMNNFSGIQIPEFFGSLKDLEYLDLSNLNIGGKVPHYLGNLSRLQYLNLGGNMFNGSIPSEMSNLTQLTLLDLGYNQLTENLPPSLERLTSLKYLDISSNRLSGVFPAWIGQLSELQTLYMDRNSMAGIISENHFANLTRLINLRLAGNWDLILNFSSTWTPPFQLGGVDLSSCKVGPQFPQWLRNQRRIEYLLISNGSISDTIPDWFKNLYPRITILDLSYNQIKGNRFERMTLSSGVERLYLNDNQLTGKLILPVPSNLMILDLSNNL…	843	3184	https://onlinelibrary.wiley.com/doi/full/10.1111/pbi.13558
PlantKGA_431	Apiales	Araliaceae	Panax	notoginseng	Panax notoginseng		三七	chromosome	Yes	转录本	Pno07G003580t4	Pno07G003580t41288xxPlantKGA_431	Pno07G003580	L	partial	7	173979647	173982830	+	Pfam	PF00560	Leucine Rich Repeat	Leucine-rich repeat	680	701	LLRLDLSRNKLSGLVPQSLSNL	1.1	MAGTCNTRIIYVLVVMFFAFPFMQRLEFVRGNEILGYPNVSCLESEKKALLQFRRSLIDESNMLSSWVGDDCCTWYGVGCSRVTGHVLKLNLRSPYETGCYSGYNSSHCLKGEINASLQNLKFLTYLDLSMNNFSGIQIPEFFGSLKDLEYLDLSNLNIGGKVPHYLGNLSRLQYLNLGGNMFNGSIPSEMSNLTQLTLLDLGYNQLTENLPPSLERLTSLKYLDISSNRLSGVFPAWIGQLSELQTLYMDRNSMAGIISENHFANLTRLINLRLAGNWDLILNFSSTWTPPFQLGGVDLSSCKVGPQFPQWLRNQRRIEYLLISNGSISDTIPDWFKNLYPRITILDLSYNQIKGNRFERMTLSSGVERLYLNDNQLTGKLILPVPSNLMILDLSNNL…	843	3184	https://onlinelibrary.wiley.com/doi/full/10.1111/pbi.13558
PlantKGA_431	Apiales	Araliaceae	Panax	notoginseng	Panax notoginseng		三七	chromosome	Yes	转录本	Pno07G003831t1	Pno07G003831t11288xxPlantKGA_431	Pno07G003831	L	partial	7	176597983	176598792	+	Pfam	PF13855	Leucine rich repeat	Leucine-rich repeat	73	129	ALFYINSNRFCGTIPRMFKDLRILYELDVGNNRFAGKFPYVVLGLPKLKFLDLRFNE	1.7e-06	MLKLLYKYGKQAILSDLNLTANWVGSDVCSYTGSSVHSCRTISSDRTVAGIDLNHGDIVGYLPEELGLLTDLALFYINSNRFCGTIPRMFKDLRILYELDVGNNRFAGKFPYVVLGLPKLKFLDLRFNEFEGKVPKELFDKDLDAIFINHNRFQFEIPDNFGNTPVSVIVLADNDFRGRLLASIGNMSDTLNEVIMMDNGLRSCFPVEVGLLKELTVFDVSFNELMWPLPNSIGGMVSLEQLNVAHNMLSGHSKNECSSALCFLYREST	269	810	https://onlinelibrary.wiley.com/doi/full/10.1111/pbi.13558
PlantKGA_431	Apiales	Araliaceae	Panax	notoginseng	Panax notoginseng		三七	chromosome	Yes	转录本	Pno07G004571t1	Pno07G004571t11288xxPlantKGA_431	Pno07G004571	L	partial	7	22502	33499	+	Pfam	PF13855	Leucine rich repeat	Leucine-rich repeat	406	462	LEALILSRNEIKEWPSAVLKPLSNLTCLKLDNNPLRQIPSDGFQAISKLQILDLSAN	8.3e-08	MDRLLKAARASGSLNLSNRSLKEVPNEVYKSLDAIGEGENWWEAVELQKLILAHNNIETLKEDLRNLPQLTVLNVSHNKLSHLPTAIGELQKLKSLDVSFNLILDIPEEIGSAASLVKFDCSNNQLKSLPSSLGRFLELSEVKVSNNCITSLPEDLANCSKLIKLDVEGNKLTMLSENMIASWTRLTELNAAKNCLSGMPENIGNLSRLIRLDLHQNRILSIPSSIMACSSLMELYMGNNSLSSLPATIGTLSQLGTFDLHSNQLKEYPVEACKLRLSVLDLSNNSLSGLPTEIGLMTTLRKLLLAGNPLRTLRSSLVSGPTPALLKYLRSRLPSDEDSGASSAKKEDVVVMAARLSLTSKELSLGGLSLSAIPAEAWKSSGITKVDLSRNSIEELPIE…	584	10998	https://onlinelibrary.wiley.com/doi/full/10.1111/pbi.13558
PlantKGA_431	Apiales	Araliaceae	Panax	notoginseng	Panax notoginseng		三七	chromosome	Yes	转录本	Pno07G004571t1	Pno07G004571t11288xxPlantKGA_431	Pno07G004571	L	partial	7	22502	33499	+	Pfam	PF13855	Leucine rich repeat	Leucine-rich repeat	46	103	ELQKLILAHNNIETLKEDLRNLPQLTVLNVSHNKLSHLPTAIGELQKLKSLDVSFNLI	1.2e-09	MDRLLKAARASGSLNLSNRSLKEVPNEVYKSLDAIGEGENWWEAVELQKLILAHNNIETLKEDLRNLPQLTVLNVSHNKLSHLPTAIGELQKLKSLDVSFNLILDIPEEIGSAASLVKFDCSNNQLKSLPSSLGRFLELSEVKVSNNCITSLPEDLANCSKLIKLDVEGNKLTMLSENMIASWTRLTELNAAKNCLSGMPENIGNLSRLIRLDLHQNRILSIPSSIMACSSLMELYMGNNSLSSLPATIGTLSQLGTFDLHSNQLKEYPVEACKLRLSVLDLSNNSLSGLPTEIGLMTTLRKLLLAGNPLRTLRSSLVSGPTPALLKYLRSRLPSDEDSGASSAKKEDVVVMAARLSLTSKELSLGGLSLSAIPAEAWKSSGITKVDLSRNSIEELPIE…	584	10998	https://onlinelibrary.wiley.com/doi/full/10.1111/pbi.13558
PlantKGA_431	Apiales	Araliaceae	Panax	notoginseng	Panax notoginseng		三七	chromosome	Yes	转录本	Pno07G004571t1	Pno07G004571t11288xxPlantKGA_431	Pno07G004571	L	partial	7	22502	33499	+	Pfam	PF13855	Leucine rich repeat	Leucine-rich repeat	476	534	PQLQELYLRRMQISEVPSDLLHLQQLRILDLSQNTLQSVPEGFKHLTSLTELDLSDNNI	6.1e-12	MDRLLKAARASGSLNLSNRSLKEVPNEVYKSLDAIGEGENWWEAVELQKLILAHNNIETLKEDLRNLPQLTVLNVSHNKLSHLPTAIGELQKLKSLDVSFNLILDIPEEIGSAASLVKFDCSNNQLKSLPSSLGRFLELSEVKVSNNCITSLPEDLANCSKLIKLDVEGNKLTMLSENMIASWTRLTELNAAKNCLSGMPENIGNLSRLIRLDLHQNRILSIPSSIMACSSLMELYMGNNSLSSLPATIGTLSQLGTFDLHSNQLKEYPVEACKLRLSVLDLSNNSLSGLPTEIGLMTTLRKLLLAGNPLRTLRSSLVSGPTPALLKYLRSRLPSDEDSGASSAKKEDVVVMAARLSLTSKELSLGGLSLSAIPAEAWKSSGITKVDLSRNSIEELPIE…	584	10998	https://onlinelibrary.wiley.com/doi/full/10.1111/pbi.13558
PlantKGA_431	Apiales	Araliaceae	Panax	notoginseng	Panax notoginseng		三七	chromosome	Yes	转录本	Pno07G004571t1	Pno07G004571t11288xxPlantKGA_431	Pno07G004571	L	partial	7	22502	33499	+	Pfam	PF13855	Leucine rich repeat	Leucine-rich repeat	208	265	RLIRLDLHQNRILSIPSSIMACSSLMELYMGNNSLSSLPATIGTLSQLGTFDLHSNQL	9.1e-07	MDRLLKAARASGSLNLSNRSLKEVPNEVYKSLDAIGEGENWWEAVELQKLILAHNNIETLKEDLRNLPQLTVLNVSHNKLSHLPTAIGELQKLKSLDVSFNLILDIPEEIGSAASLVKFDCSNNQLKSLPSSLGRFLELSEVKVSNNCITSLPEDLANCSKLIKLDVEGNKLTMLSENMIASWTRLTELNAAKNCLSGMPENIGNLSRLIRLDLHQNRILSIPSSIMACSSLMELYMGNNSLSSLPATIGTLSQLGTFDLHSNQLKEYPVEACKLRLSVLDLSNNSLSGLPTEIGLMTTLRKLLLAGNPLRTLRSSLVSGPTPALLKYLRSRLPSDEDSGASSAKKEDVVVMAARLSLTSKELSLGGLSLSAIPAEAWKSSGITKVDLSRNSIEELPIE…	584	10998	https://onlinelibrary.wiley.com/doi/full/10.1111/pbi.13558
PlantKGA_431	Apiales	Araliaceae	Panax	notoginseng	Panax notoginseng		三七	chromosome	Yes	转录本	Pno07G006320t1	Pno07G006320t11288xxPlantKGA_431	Pno07G006320	L	partial	7	33263708	33265327	-	Pfam	PF00560	Leucine Rich Repeat	Leucine-rich repeat	177	199	SLMHLDLSKNQLSGELPSDLGNL	0.84	MELTGLLTVVLLAVILTVNACPPADRAALLSFKAALSEPYLGIFNSWTGNDCCNRWYGVSCDPATGRVADISLRGESEDPIFEKAGRSGYMTGLISPSIGSLDRLTTLVVADWKGISGEIPACITSLPSLRILDLIGNKISGKIPADIGKLNRLTVLNLADNAISGSVPPSIVNLCSLMHLDLSKNQLSGELPSDLGNLKMMSRALLSQNQFTGSIPYSIANIYRLADLDLSMNRISGSIPHQLGSMPVLSSLNLDSNQISGEIPATILSNTGLNIVNLSRNYLEGYLPDVFHSKTYFSAIDLSYNNLRGSIPKSISSAMYVGHLDLSHNHLCGIIPSGLPFDHLDASSFANNDCLCGSPLRTC	364	1620	https://onlinelibrary.wiley.com/doi/full/10.1111/pbi.13558
PlantKGA_431	Apiales	Araliaceae	Panax	notoginseng	Panax notoginseng		三七	chromosome	Yes	转录本	Pno07G006320t1	Pno07G006320t11288xxPlantKGA_431	Pno07G006320	L	partial	7	33263708	33265327	-	Pfam	PF08263	Leucine rich repeat N-terminal domain	Leucine-rich repeat-containing N-terminal, plant-type	23	62	PADRAALLSFKAALSEPYLGIFNSWTGNDCCNRWYGVSCD	1.6e-10	MELTGLLTVVLLAVILTVNACPPADRAALLSFKAALSEPYLGIFNSWTGNDCCNRWYGVSCDPATGRVADISLRGESEDPIFEKAGRSGYMTGLISPSIGSLDRLTTLVVADWKGISGEIPACITSLPSLRILDLIGNKISGKIPADIGKLNRLTVLNLADNAISGSVPPSIVNLCSLMHLDLSKNQLSGELPSDLGNLKMMSRALLSQNQFTGSIPYSIANIYRLADLDLSMNRISGSIPHQLGSMPVLSSLNLDSNQISGEIPATILSNTGLNIVNLSRNYLEGYLPDVFHSKTYFSAIDLSYNNLRGSIPKSISSAMYVGHLDLSHNHLCGIIPSGLPFDHLDASSFANNDCLCGSPLRTC	364	1620	https://onlinelibrary.wiley.com/doi/full/10.1111/pbi.13558
PlantKGA_431	Apiales	Araliaceae	Panax	notoginseng	Panax notoginseng		三七	chromosome	Yes	转录本	Pno07G006320t1	Pno07G006320t11288xxPlantKGA_431	Pno07G006320	L	partial	7	33263708	33265327	-	Pfam	PF13516	Leucine Rich repeat	Leucine-rich repeat	152	166	NRLTVLNLADNAISG	1.9	MELTGLLTVVLLAVILTVNACPPADRAALLSFKAALSEPYLGIFNSWTGNDCCNRWYGVSCDPATGRVADISLRGESEDPIFEKAGRSGYMTGLISPSIGSLDRLTTLVVADWKGISGEIPACITSLPSLRILDLIGNKISGKIPADIGKLNRLTVLNLADNAISGSVPPSIVNLCSLMHLDLSKNQLSGELPSDLGNLKMMSRALLSQNQFTGSIPYSIANIYRLADLDLSMNRISGSIPHQLGSMPVLSSLNLDSNQISGEIPATILSNTGLNIVNLSRNYLEGYLPDVFHSKTYFSAIDLSYNNLRGSIPKSISSAMYVGHLDLSHNHLCGIIPSGLPFDHLDASSFANNDCLCGSPLRTC	364	1620	https://onlinelibrary.wiley.com/doi/full/10.1111/pbi.13558
PlantKGA_431	Apiales	Araliaceae	Panax	notoginseng	Panax notoginseng		三七	chromosome	Yes	转录本	Pno08G001620t1	Pno08G001620t11288xxPlantKGA_431	Pno08G001620	L	partial	8	13605385	13607238	-	Pfam	PF08263	Leucine rich repeat N-terminal domain	Leucine-rich repeat-containing N-terminal, plant-type	50	91	SNDLKALEGFMKGLDSAIDGWKLSTNSSFSSNCCNWVGITCS	0.00018	MPVFTEPFLSVCIWACFTEMGTLELWVILFLSGFSLQAEVLNAQNLTCNSNDLKALEGFMKGLDSAIDGWKLSTNSSFSSNCCNWVGITCSSSSSLGLNDEFDSGRVVKLELGRKRLTGKLSGSIGSLDQLKTLNVSHNFLRGSIPTSLLNLPNLEVLDLKNNDFSGLLPMSMNLPSIQVFNISENSFQGLVPAGICNNSPRIRDINIAVNCFNGSIPLELGNCSLLEHLGLASNSLSGTIPQDFFRLPNLSLLTLQDNRLSGQFSNNIGNLSNLVRLDISSNRFLGSLPDVFHRFRKLEYFSAHSNNFTGKIPLSLSNSHTIVSLSLRNNSLDGRIYLNCSAMTRLVSLDLASNRFHGFIPDNMPYCPRLRTINLAKINFSGQIPGSFKDFHSLSYLS…	542	1854	https://onlinelibrary.wiley.com/doi/full/10.1111/pbi.13558
PlantKGA_431	Apiales	Araliaceae	Panax	notoginseng	Panax notoginseng		三七	chromosome	Yes	转录本	Pno08G001620t1	Pno08G001620t11288xxPlantKGA_431	Pno08G001620	L	partial	8	13605385	13607238	-	Pfam	PF13855	Leucine rich repeat	Leucine-rich repeat	108	165	VKLELGRKRLTGKLSGSIGSLDQLKTLNVSHNFLRGSIPTSLLNLPNLEVLDLKNNDF	1.5e-06	MPVFTEPFLSVCIWACFTEMGTLELWVILFLSGFSLQAEVLNAQNLTCNSNDLKALEGFMKGLDSAIDGWKLSTNSSFSSNCCNWVGITCSSSSSLGLNDEFDSGRVVKLELGRKRLTGKLSGSIGSLDQLKTLNVSHNFLRGSIPTSLLNLPNLEVLDLKNNDFSGLLPMSMNLPSIQVFNISENSFQGLVPAGICNNSPRIRDINIAVNCFNGSIPLELGNCSLLEHLGLASNSLSGTIPQDFFRLPNLSLLTLQDNRLSGQFSNNIGNLSNLVRLDISSNRFLGSLPDVFHRFRKLEYFSAHSNNFTGKIPLSLSNSHTIVSLSLRNNSLDGRIYLNCSAMTRLVSLDLASNRFHGFIPDNMPYCPRLRTINLAKINFSGQIPGSFKDFHSLSYLS…	542	1854	https://onlinelibrary.wiley.com/doi/full/10.1111/pbi.13558
PlantKGA_431	Apiales	Araliaceae	Panax	notoginseng	Panax notoginseng		三七	chromosome	Yes	转录本	Pno08G001620t1	Pno08G001620t11288xxPlantKGA_431	Pno08G001620	L	partial	8	13605385	13607238	-	Pfam	PF00560	Leucine Rich Repeat	Leucine-rich repeat	469	490	QLQLLDLSWNHLEGTIASWFGS	0.35	MPVFTEPFLSVCIWACFTEMGTLELWVILFLSGFSLQAEVLNAQNLTCNSNDLKALEGFMKGLDSAIDGWKLSTNSSFSSNCCNWVGITCSSSSSLGLNDEFDSGRVVKLELGRKRLTGKLSGSIGSLDQLKTLNVSHNFLRGSIPTSLLNLPNLEVLDLKNNDFSGLLPMSMNLPSIQVFNISENSFQGLVPAGICNNSPRIRDINIAVNCFNGSIPLELGNCSLLEHLGLASNSLSGTIPQDFFRLPNLSLLTLQDNRLSGQFSNNIGNLSNLVRLDISSNRFLGSLPDVFHRFRKLEYFSAHSNNFTGKIPLSLSNSHTIVSLSLRNNSLDGRIYLNCSAMTRLVSLDLASNRFHGFIPDNMPYCPRLRTINLAKINFSGQIPGSFKDFHSLSYLS…	542	1854	https://onlinelibrary.wiley.com/doi/full/10.1111/pbi.13558
PlantKGA_431	Apiales	Araliaceae	Panax	notoginseng	Panax notoginseng		三七	chromosome	Yes	转录本	Pno08G001792t1	Pno08G001792t11288xxPlantKGA_431	Pno08G001792	L	partial	8	14075249	14077284	-	Pfam	PF13516	Leucine Rich repeat	Leucine-rich repeat	192	215	NCHNLEELGLQGCTNITDSGLTVL	0.026	MEGEVKGVVSEQPTPPMTTSRASINGTLRDDELRAVLGKLESEKDKEVFGLVCKRWLRLQSTERKKLSARAGPHMLRKMAARFTRLHHLDLSQSVSRSFYPGVTDSDLSVIATSITYLRSLNLQNCKGITDAGIATIGTGLSSLQCLDVSYCRKLTDKGLSAVAEGCASLKRLHLAGCRFVTDALLGALSRNCHNLEELGLQGCTNITDSGLTVLVEGCQRMKYLDINKCSNVGDNGISSISKACSASLKTLKLLDCYKLGDAAILSLAKFCKNLEILIIGGCRDISDESIKSLAAACNVNLKILRMDWCLNVSDSSLNCILSHCRSLEVLDVGCCEEVTDAAFQGLGSETENFELTLKILKVSNCPKITVAGISMILELCKTLEYIDVRSCPRVTKAG…	426	2036	https://onlinelibrary.wiley.com/doi/full/10.1111/pbi.13558
PlantKGA_431	Apiales	Araliaceae	Panax	notoginseng	Panax notoginseng		三七	chromosome	Yes	转录本	Pno08G001792t1	Pno08G001792t11288xxPlantKGA_431	Pno08G001792	L	partial	8	14075249	14077284	-	Pfam	PF13516	Leucine Rich repeat	Leucine-rich repeat	219	242	CQRMKYLDINKCSNVGDNGISSIS	0.25	MEGEVKGVVSEQPTPPMTTSRASINGTLRDDELRAVLGKLESEKDKEVFGLVCKRWLRLQSTERKKLSARAGPHMLRKMAARFTRLHHLDLSQSVSRSFYPGVTDSDLSVIATSITYLRSLNLQNCKGITDAGIATIGTGLSSLQCLDVSYCRKLTDKGLSAVAEGCASLKRLHLAGCRFVTDALLGALSRNCHNLEELGLQGCTNITDSGLTVLVEGCQRMKYLDINKCSNVGDNGISSISKACSASLKTLKLLDCYKLGDAAILSLAKFCKNLEILIIGGCRDISDESIKSLAAACNVNLKILRMDWCLNVSDSSLNCILSHCRSLEVLDVGCCEEVTDAAFQGLGSETENFELTLKILKVSNCPKITVAGISMILELCKTLEYIDVRSCPRVTKAG…	426	2036	https://onlinelibrary.wiley.com/doi/full/10.1111/pbi.13558
PlantKGA_431	Apiales	Araliaceae	Panax	notoginseng	Panax notoginseng		三七	chromosome	Yes	转录本	Pno08G001792t1	Pno08G001792t11288xxPlantKGA_431	Pno08G001792	L	partial	8	14075249	14077284	-	Pfam	PF13516	Leucine Rich repeat	Leucine-rich repeat	142	164	SSLQCLDVSYCRKLTDKGLSAVA	0.0041	MEGEVKGVVSEQPTPPMTTSRASINGTLRDDELRAVLGKLESEKDKEVFGLVCKRWLRLQSTERKKLSARAGPHMLRKMAARFTRLHHLDLSQSVSRSFYPGVTDSDLSVIATSITYLRSLNLQNCKGITDAGIATIGTGLSSLQCLDVSYCRKLTDKGLSAVAEGCASLKRLHLAGCRFVTDALLGALSRNCHNLEELGLQGCTNITDSGLTVLVEGCQRMKYLDINKCSNVGDNGISSISKACSASLKTLKLLDCYKLGDAAILSLAKFCKNLEILIIGGCRDISDESIKSLAAACNVNLKILRMDWCLNVSDSSLNCILSHCRSLEVLDVGCCEEVTDAAFQGLGSETENFELTLKILKVSNCPKITVAGISMILELCKTLEYIDVRSCPRVTKAG…	426	2036	https://onlinelibrary.wiley.com/doi/full/10.1111/pbi.13558
PlantKGA_431	Apiales	Araliaceae	Panax	notoginseng	Panax notoginseng		三七	chromosome	Yes	转录本	Pno08G001792t1	Pno08G001792t11288xxPlantKGA_431	Pno08G001792	L	partial	8	14075249	14077284	-	Pfam	PF13516	Leucine Rich repeat	Leucine-rich repeat	324	341	HCRSLEVLDVGCCEEVTD	1.2	MEGEVKGVVSEQPTPPMTTSRASINGTLRDDELRAVLGKLESEKDKEVFGLVCKRWLRLQSTERKKLSARAGPHMLRKMAARFTRLHHLDLSQSVSRSFYPGVTDSDLSVIATSITYLRSLNLQNCKGITDAGIATIGTGLSSLQCLDVSYCRKLTDKGLSAVAEGCASLKRLHLAGCRFVTDALLGALSRNCHNLEELGLQGCTNITDSGLTVLVEGCQRMKYLDINKCSNVGDNGISSISKACSASLKTLKLLDCYKLGDAAILSLAKFCKNLEILIIGGCRDISDESIKSLAAACNVNLKILRMDWCLNVSDSSLNCILSHCRSLEVLDVGCCEEVTDAAFQGLGSETENFELTLKILKVSNCPKITVAGISMILELCKTLEYIDVRSCPRVTKAG…	426	2036	https://onlinelibrary.wiley.com/doi/full/10.1111/pbi.13558
PlantKGA_431	Apiales	Araliaceae	Panax	notoginseng	Panax notoginseng		三七	chromosome	Yes	转录本	Pno08G001792t1	Pno08G001792t11288xxPlantKGA_431	Pno08G001792	L	partial	8	14075249	14077284	-	Pfam	PF13516	Leucine Rich repeat	Leucine-rich repeat	272	295	CKNLEILIIGGCRDISDESIKSLA	1.3	MEGEVKGVVSEQPTPPMTTSRASINGTLRDDELRAVLGKLESEKDKEVFGLVCKRWLRLQSTERKKLSARAGPHMLRKMAARFTRLHHLDLSQSVSRSFYPGVTDSDLSVIATSITYLRSLNLQNCKGITDAGIATIGTGLSSLQCLDVSYCRKLTDKGLSAVAEGCASLKRLHLAGCRFVTDALLGALSRNCHNLEELGLQGCTNITDSGLTVLVEGCQRMKYLDINKCSNVGDNGISSISKACSASLKTLKLLDCYKLGDAAILSLAKFCKNLEILIIGGCRDISDESIKSLAAACNVNLKILRMDWCLNVSDSSLNCILSHCRSLEVLDVGCCEEVTDAAFQGLGSETENFELTLKILKVSNCPKITVAGISMILELCKTLEYIDVRSCPRVTKAG…	426	2036	https://onlinelibrary.wiley.com/doi/full/10.1111/pbi.13558
PlantKGA_431	Apiales	Araliaceae	Panax	notoginseng	Panax notoginseng		三七	chromosome	Yes	转录本	Pno08G001792t1	Pno08G001792t11288xxPlantKGA_431	Pno08G001792	L	partial	8	14075249	14077284	-	Pfam	PF13516	Leucine Rich repeat	Leucine-rich repeat	116	137	TYLRSLNLQNCKGITDAGIATI	0.03	MEGEVKGVVSEQPTPPMTTSRASINGTLRDDELRAVLGKLESEKDKEVFGLVCKRWLRLQSTERKKLSARAGPHMLRKMAARFTRLHHLDLSQSVSRSFYPGVTDSDLSVIATSITYLRSLNLQNCKGITDAGIATIGTGLSSLQCLDVSYCRKLTDKGLSAVAEGCASLKRLHLAGCRFVTDALLGALSRNCHNLEELGLQGCTNITDSGLTVLVEGCQRMKYLDINKCSNVGDNGISSISKACSASLKTLKLLDCYKLGDAAILSLAKFCKNLEILIIGGCRDISDESIKSLAAACNVNLKILRMDWCLNVSDSSLNCILSHCRSLEVLDVGCCEEVTDAAFQGLGSETENFELTLKILKVSNCPKITVAGISMILELCKTLEYIDVRSCPRVTKAG…	426	2036	https://onlinelibrary.wiley.com/doi/full/10.1111/pbi.13558
PlantKGA_431	Apiales	Araliaceae	Panax	notoginseng	Panax notoginseng		三七	chromosome	Yes	转录本	Pno08G001937t1	Pno08G001937t11288xxPlantKGA_431	Pno08G001937	L	partial	8	144405161	144406650	-	Pfam	PF13855	Leucine rich repeat	Leucine-rich repeat	128	188	PYLRILDLIGNKLSGPLPVDIGRLSRLTVLNIADNNISGPLPRSIANLSSLMHLDIRNNQI	8.8e-07	MGFFIFITAILLATAAAVTSCTAPDRAALLAFKAALNEPYLGIFKSWTGNDCCHQWYGVICDTTNGRVADINLRGESEDPIFQKAHRTGYMTGWISPAICKLTWLSSITIADWKGISGPIPDCISYLPYLRILDLIGNKLSGPLPVDIGRLSRLTVLNIADNNISGPLPRSIANLSSLMHLDIRNNQISGTIPRNIGKLRMMSRALLSRNRISGPIPVSISYIYRLSDIDLSLNQISGSIPPSLGKMGVLATLNLDGNRISGTIPPTLLNSRIGILNLSKNWLEGNIPDVFGPRSYFTAIDLSYNQLKGPIPKSITGATYVGHLDLSHNHLCGRIPVGSPFDHLEASSFIGNDCLCGKPLRPC	363	1490	https://onlinelibrary.wiley.com/doi/full/10.1111/pbi.13558
PlantKGA_431	Apiales	Araliaceae	Panax	notoginseng	Panax notoginseng		三七	chromosome	Yes	转录本	Pno08G001937t1	Pno08G001937t11288xxPlantKGA_431	Pno08G001937	L	partial	8	144405161	144406650	-	Pfam	PF08263	Leucine rich repeat N-terminal domain	Leucine-rich repeat-containing N-terminal, plant-type	24	62	PDRAALLAFKAALNEPYLGIFKSWTGNDCCHQWYGVICD	1.1e-10	MGFFIFITAILLATAAAVTSCTAPDRAALLAFKAALNEPYLGIFKSWTGNDCCHQWYGVICDTTNGRVADINLRGESEDPIFQKAHRTGYMTGWISPAICKLTWLSSITIADWKGISGPIPDCISYLPYLRILDLIGNKLSGPLPVDIGRLSRLTVLNIADNNISGPLPRSIANLSSLMHLDIRNNQISGTIPRNIGKLRMMSRALLSRNRISGPIPVSISYIYRLSDIDLSLNQISGSIPPSLGKMGVLATLNLDGNRISGTIPPTLLNSRIGILNLSKNWLEGNIPDVFGPRSYFTAIDLSYNQLKGPIPKSITGATYVGHLDLSHNHLCGRIPVGSPFDHLEASSFIGNDCLCGKPLRPC	363	1490	https://onlinelibrary.wiley.com/doi/full/10.1111/pbi.13558
PlantKGA_431	Apiales	Araliaceae	Panax	notoginseng	Panax notoginseng		三七	chromosome	Yes	转录本	Pno08G002227t1	Pno08G002227t11288xxPlantKGA_431	Pno08G002227	L	partial	8	150020449	150023197	+	Pfam	PF08263	Leucine rich repeat N-terminal domain	Leucine-rich repeat-containing N-terminal, plant-type	25	76	NDQKESLLQLKSSFLNIFPSNSSSSDTSFFALHSWNSSTSSDCCTWDRVVCS	2e-07	MAKLVILIITLVPFILIIPSLCCSNDQKESLLQLKSSFLNIFPSNSSSSDTSFFALHSWNSSTSSDCCTWDRVVCSSPAANSRDITALHLDSLLPLPTLHPIAVNSNILAPIFRIQSLMLLDISSNDITGKIPSKGLANLTNLVYLDMAMNSFSGSIPSQLFHLRFLQYLDLSTNLLEGGLSRQVGYLRNLRTFKLDGNMLGGNIPIEIGNLTKLQQFSLRQNKFSGGIPYSILDLKELEGLDLRDNLLSMEIPSGIGRLSNISTLALSKNKFTGVIPPSIQNLSKLETLRLEDNMLAGEIPTWLFDIKSLKNLFLGGNKMIWNNNMKIVPKCMLSQLSLKSCRISGEIPQWISTQKNLDFLDLSDNKLNGRFPLWLAKMEVGSIILSENKLTGSIPSR…	836	2749	https://onlinelibrary.wiley.com/doi/full/10.1111/pbi.13558
PlantKGA_431	Apiales	Araliaceae	Panax	notoginseng	Panax notoginseng		三七	chromosome	Yes	转录本	Pno08G002227t1	Pno08G002227t11288xxPlantKGA_431	Pno08G002227	L	partial	8	150020449	150023197	+	Pfam	PF13855	Leucine rich repeat	Leucine-rich repeat	523	583	QLEHLDLHDNNITGELPEFLSKISTLQVLNLRNNSLHGTIPSNTISNLTSLRILDLSSNSI	1.6e-07	MAKLVILIITLVPFILIIPSLCCSNDQKESLLQLKSSFLNIFPSNSSSSDTSFFALHSWNSSTSSDCCTWDRVVCSSPAANSRDITALHLDSLLPLPTLHPIAVNSNILAPIFRIQSLMLLDISSNDITGKIPSKGLANLTNLVYLDMAMNSFSGSIPSQLFHLRFLQYLDLSTNLLEGGLSRQVGYLRNLRTFKLDGNMLGGNIPIEIGNLTKLQQFSLRQNKFSGGIPYSILDLKELEGLDLRDNLLSMEIPSGIGRLSNISTLALSKNKFTGVIPPSIQNLSKLETLRLEDNMLAGEIPTWLFDIKSLKNLFLGGNKMIWNNNMKIVPKCMLSQLSLKSCRISGEIPQWISTQKNLDFLDLSDNKLNGRFPLWLAKMEVGSIILSENKLTGSIPSR…	836	2749	https://onlinelibrary.wiley.com/doi/full/10.1111/pbi.13558
PlantKGA_431	Apiales	Araliaceae	Panax	notoginseng	Panax notoginseng		三七	chromosome	Yes	转录本	Pno08G002227t1	Pno08G002227t11288xxPlantKGA_431	Pno08G002227	L	partial	8	150020449	150023197	+	Pfam	PF13855	Leucine rich repeat	Leucine-rich repeat	663	721	LKLLNISYNRLSGNIPESFGDLESLETLDLSHNDISGSIPQSLAKLKELSILDVSNNKL	3.7e-11	MAKLVILIITLVPFILIIPSLCCSNDQKESLLQLKSSFLNIFPSNSSSSDTSFFALHSWNSSTSSDCCTWDRVVCSSPAANSRDITALHLDSLLPLPTLHPIAVNSNILAPIFRIQSLMLLDISSNDITGKIPSKGLANLTNLVYLDMAMNSFSGSIPSQLFHLRFLQYLDLSTNLLEGGLSRQVGYLRNLRTFKLDGNMLGGNIPIEIGNLTKLQQFSLRQNKFSGGIPYSILDLKELEGLDLRDNLLSMEIPSGIGRLSNISTLALSKNKFTGVIPPSIQNLSKLETLRLEDNMLAGEIPTWLFDIKSLKNLFLGGNKMIWNNNMKIVPKCMLSQLSLKSCRISGEIPQWISTQKNLDFLDLSDNKLNGRFPLWLAKMEVGSIILSENKLTGSIPSR…	836	2749	https://onlinelibrary.wiley.com/doi/full/10.1111/pbi.13558
PlantKGA_431	Apiales	Araliaceae	Panax	notoginseng	Panax notoginseng		三七	chromosome	Yes	转录本	Pno08G002227t1	Pno08G002227t11288xxPlantKGA_431	Pno08G002227	L	partial	8	150020449	150023197	+	Pfam	PF13855	Leucine rich repeat	Leucine-rich repeat	262	320	NISTLALSKNKFTGVIPPSIQNLSKLETLRLEDNMLAGEIPTWLFDIKSLKNLFLGGNK	1.8e-07	MAKLVILIITLVPFILIIPSLCCSNDQKESLLQLKSSFLNIFPSNSSSSDTSFFALHSWNSSTSSDCCTWDRVVCSSPAANSRDITALHLDSLLPLPTLHPIAVNSNILAPIFRIQSLMLLDISSNDITGKIPSKGLANLTNLVYLDMAMNSFSGSIPSQLFHLRFLQYLDLSTNLLEGGLSRQVGYLRNLRTFKLDGNMLGGNIPIEIGNLTKLQQFSLRQNKFSGGIPYSILDLKELEGLDLRDNLLSMEIPSGIGRLSNISTLALSKNKFTGVIPPSIQNLSKLETLRLEDNMLAGEIPTWLFDIKSLKNLFLGGNKMIWNNNMKIVPKCMLSQLSLKSCRISGEIPQWISTQKNLDFLDLSDNKLNGRFPLWLAKMEVGSIILSENKLTGSIPSR…	836	2749	https://onlinelibrary.wiley.com/doi/full/10.1111/pbi.13558
PlantKGA_431	Apiales	Araliaceae	Panax	notoginseng	Panax notoginseng		三七	chromosome	Yes	转录本	Pno08G002670t1	Pno08G002670t11288xxPlantKGA_431	Pno08G002670	L	partial	8	18438155	18456979	-	Pfam	PF13516	Leucine Rich repeat	Leucine-rich repeat	521	543	CSLLKDIVLSHCRLITDVGLSHL	0.47	MRGHDRINRILPDELILEIFQHLSSKSSRDACSLVCKRWLNLERLSRDTIRIGASGSPDALVKLLADRFVNARNLYIDERLSISLPVEFARRRGPDALSMVRLHFVSERNGSRDSETESHCLSDAGLAAVGDGFTKIEKLSLIWCSNATSEGLRSMAEKCKFLKSLDLQGCYVGDQGLVAVGECCKKLEDLNLRFCEGLTDTGLVELALGCGKTLKSLGVAACAKITDVSLEAVGSSCISLETLSLDSEFIHNKGVLAVAKGCPKLKVLKLQCTNVTDEALQAVGLFCLSLELLSLYSFQRFTDKSLCAIGKGCKKLKNLTLSDCYFLSDTGLEAVAVGCTELTNLEINGCHNIGSFGLETIGRSCTRLSELALLYCQKIGDYALSEVGRGCKDLQALH…	605	18825	https://onlinelibrary.wiley.com/doi/full/10.1111/pbi.13558
PlantKGA_431	Apiales	Araliaceae	Panax	notoginseng	Panax notoginseng		三七	chromosome	Yes	转录本	Pno08G002670t1	Pno08G002670t11288xxPlantKGA_431	Pno08G002670	L	partial	8	18438155	18456979	-	Pfam	PF13516	Leucine Rich repeat	Leucine-rich repeat	263	283	CPKLKVLKLQCTNVTDEALQA	0.47	MRGHDRINRILPDELILEIFQHLSSKSSRDACSLVCKRWLNLERLSRDTIRIGASGSPDALVKLLADRFVNARNLYIDERLSISLPVEFARRRGPDALSMVRLHFVSERNGSRDSETESHCLSDAGLAAVGDGFTKIEKLSLIWCSNATSEGLRSMAEKCKFLKSLDLQGCYVGDQGLVAVGECCKKLEDLNLRFCEGLTDTGLVELALGCGKTLKSLGVAACAKITDVSLEAVGSSCISLETLSLDSEFIHNKGVLAVAKGCPKLKVLKLQCTNVTDEALQAVGLFCLSLELLSLYSFQRFTDKSLCAIGKGCKKLKNLTLSDCYFLSDTGLEAVAVGCTELTNLEINGCHNIGSFGLETIGRSCTRLSELALLYCQKIGDYALSEVGRGCKDLQALH…	605	18825	https://onlinelibrary.wiley.com/doi/full/10.1111/pbi.13558
PlantKGA_431	Apiales	Araliaceae	Panax	notoginseng	Panax notoginseng		三七	chromosome	Yes	转录本	Pno08G002670t1	Pno08G002670t11288xxPlantKGA_431	Pno08G002670	L	partial	8	18438155	18456979	-	Pfam	PF13516	Leucine Rich repeat	Leucine-rich repeat	444	466	CKFLTDLSLRFCDRVGNEALVAI	0.8	MRGHDRINRILPDELILEIFQHLSSKSSRDACSLVCKRWLNLERLSRDTIRIGASGSPDALVKLLADRFVNARNLYIDERLSISLPVEFARRRGPDALSMVRLHFVSERNGSRDSETESHCLSDAGLAAVGDGFTKIEKLSLIWCSNATSEGLRSMAEKCKFLKSLDLQGCYVGDQGLVAVGECCKKLEDLNLRFCEGLTDTGLVELALGCGKTLKSLGVAACAKITDVSLEAVGSSCISLETLSLDSEFIHNKGVLAVAKGCPKLKVLKLQCTNVTDEALQAVGLFCLSLELLSLYSFQRFTDKSLCAIGKGCKKLKNLTLSDCYFLSDTGLEAVAVGCTELTNLEINGCHNIGSFGLETIGRSCTRLSELALLYCQKIGDYALSEVGRGCKDLQALH…	605	18825	https://onlinelibrary.wiley.com/doi/full/10.1111/pbi.13558
PlantKGA_431	Apiales	Araliaceae	Panax	notoginseng	Panax notoginseng		三七	chromosome	Yes	转录本	Pno08G002670t1	Pno08G002670t11288xxPlantKGA_431	Pno08G002670	L	partial	8	18438155	18456979	-	Pfam	PF13516	Leucine Rich repeat	Leucine-rich repeat	159	181	KCKFLKSLDLQGCYVGDQGLVAV	0.037	MRGHDRINRILPDELILEIFQHLSSKSSRDACSLVCKRWLNLERLSRDTIRIGASGSPDALVKLLADRFVNARNLYIDERLSISLPVEFARRRGPDALSMVRLHFVSERNGSRDSETESHCLSDAGLAAVGDGFTKIEKLSLIWCSNATSEGLRSMAEKCKFLKSLDLQGCYVGDQGLVAVGECCKKLEDLNLRFCEGLTDTGLVELALGCGKTLKSLGVAACAKITDVSLEAVGSSCISLETLSLDSEFIHNKGVLAVAKGCPKLKVLKLQCTNVTDEALQAVGLFCLSLELLSLYSFQRFTDKSLCAIGKGCKKLKNLTLSDCYFLSDTGLEAVAVGCTELTNLEINGCHNIGSFGLETIGRSCTRLSELALLYCQKIGDYALSEVGRGCKDLQALH…	605	18825	https://onlinelibrary.wiley.com/doi/full/10.1111/pbi.13558
PlantKGA_431	Apiales	Araliaceae	Panax	notoginseng	Panax notoginseng		三七	chromosome	Yes	转录本	Pno08G002670t1	Pno08G002670t11288xxPlantKGA_431	Pno08G002670	L	partial	8	18438155	18456979	-	Pfam	PF13516	Leucine Rich repeat	Leucine-rich repeat	185	208	CKKLEDLNLRFCEGLTDTGLVELA	0.032	MRGHDRINRILPDELILEIFQHLSSKSSRDACSLVCKRWLNLERLSRDTIRIGASGSPDALVKLLADRFVNARNLYIDERLSISLPVEFARRRGPDALSMVRLHFVSERNGSRDSETESHCLSDAGLAAVGDGFTKIEKLSLIWCSNATSEGLRSMAEKCKFLKSLDLQGCYVGDQGLVAVGECCKKLEDLNLRFCEGLTDTGLVELALGCGKTLKSLGVAACAKITDVSLEAVGSSCISLETLSLDSEFIHNKGVLAVAKGCPKLKVLKLQCTNVTDEALQAVGLFCLSLELLSLYSFQRFTDKSLCAIGKGCKKLKNLTLSDCYFLSDTGLEAVAVGCTELTNLEINGCHNIGSFGLETIGRSCTRLSELALLYCQKIGDYALSEVGRGCKDLQALH…	605	18825	https://onlinelibrary.wiley.com/doi/full/10.1111/pbi.13558
PlantKGA_431	Apiales	Araliaceae	Panax	notoginseng	Panax notoginseng		三七	chromosome	Yes	转录本	Pno08G002670t1	Pno08G002670t11288xxPlantKGA_431	Pno08G002670	L	partial	8	18438155	18456979	-	Pfam	PF13516	Leucine Rich repeat	Leucine-rich repeat	470	492	CSLHHLNVSGCHQIGDAGVIAVA	0.0016	MRGHDRINRILPDELILEIFQHLSSKSSRDACSLVCKRWLNLERLSRDTIRIGASGSPDALVKLLADRFVNARNLYIDERLSISLPVEFARRRGPDALSMVRLHFVSERNGSRDSETESHCLSDAGLAAVGDGFTKIEKLSLIWCSNATSEGLRSMAEKCKFLKSLDLQGCYVGDQGLVAVGECCKKLEDLNLRFCEGLTDTGLVELALGCGKTLKSLGVAACAKITDVSLEAVGSSCISLETLSLDSEFIHNKGVLAVAKGCPKLKVLKLQCTNVTDEALQAVGLFCLSLELLSLYSFQRFTDKSLCAIGKGCKKLKNLTLSDCYFLSDTGLEAVAVGCTELTNLEINGCHNIGSFGLETIGRSCTRLSELALLYCQKIGDYALSEVGRGCKDLQALH…	605	18825	https://onlinelibrary.wiley.com/doi/full/10.1111/pbi.13558
PlantKGA_431	Apiales	Araliaceae	Panax	notoginseng	Panax notoginseng		三七	chromosome	Yes	转录本	Pno08G002829t1	Pno08G002829t11288xxPlantKGA_431	Pno08G002829	L	partial	8	19520411	19525423	+	Pfam	PF08263	Leucine rich repeat N-terminal domain	Leucine-rich repeat-containing N-terminal, plant-type	359	396	RDVIALESMKNSFLNPPFDWNGDPCLPLQYPWTGVTCS	0.00014	MPCFFLYLIFIFSLLHRSISQPPKGILIDCGATVRSVIDGREWVPDTDYISTGTPKNLTTPNLVQILSTVRSFPLAGNTRRKFCYNVPVYRTGKYLIRTTYFYGGINGNESPPVFDQIVDGTFWSVVNTTDDYVKGMSSYYEGVFLAKGKILSLCLAANTYTDSDPFISGLEFVLLDNSLYNSTNFDTYGLSLVARHSFGYDGPNIRYPDDQFDRYWEAFGENNPTISARNVSVSGFWNLPPLKCFQTKLSVGQPEPLTFQWPPVSLPNSTYYIALYFADDRDSSSGVPRVFNININNIVYFRDLNVIPNGVVVYANRWPLAGPTTITLSPAAGSTVGPLINAGEVFNVVLLGGRTHTRDVIALESMKNSFLNPPFDWNGDPCLPLQYPWTGVTCSEGS…	514	5013	https://onlinelibrary.wiley.com/doi/full/10.1111/pbi.13558
PlantKGA_431	Apiales	Araliaceae	Panax	notoginseng	Panax notoginseng		三七	chromosome	Yes	转录本	Pno08G002930t1	Pno08G002930t11288xxPlantKGA_431	Pno08G002930	L	partial	8	20220090	20221377	+	Pfam	PF08263	Leucine rich repeat N-terminal domain	Leucine-rich repeat-containing N-terminal, plant-type	48	80	ALQAWKHTIISDPKSFTSNWNTPFVCNYTGVYC	8.1e-05	MKINPYLNPSILAFFSLTITFSFFTTPSHQSSNPTLPPNPRLQKAYIALQAWKHTIISDPKSFTSNWNTPFVCNYTGVYCTPALDNPNLQTVAGIDLNHADISGTLPELLGLLTDLSLFHVNSNRFSGTLPESFRNLHLLYELDISNNQFSGHFPCVVLFLPSLKFLDIRFNEFEGNIPSSLFDLKLDALFINNNHFQSSLPENIGNSPVSVLVLANNNHNGCFPASITKMGKTLNEIIISNVGLVGCLATEIGLLKGVTVFDVSFNRLSGSLPESMGGMESLEQLNVAHNKLSGEITGNICSLPRLENFTYSDNYFCGEPPGCLKLADKDDRQNCIAERPLQRSVMECKAFYSNPVDCGGCSPTSPPPPRSAPPPPLRLRVGFYHHP	388	1288	https://onlinelibrary.wiley.com/doi/full/10.1111/pbi.13558
PlantKGA_431	Apiales	Araliaceae	Panax	notoginseng	Panax notoginseng		三七	chromosome	Yes	转录本	Pno08G005941t1	Pno08G005941t11288xxPlantKGA_431	Pno08G005941	L	partial	8	43264605	43267554	+	Pfam	PF08263	Leucine rich repeat N-terminal domain	Leucine-rich repeat-containing N-terminal, plant-type	33	72	EDEAAALLTWKASLDKRSQSLLSSWAGSSPCSNWTGISCD	2.2e-10	MTHLNYDQIFSLLPLMFFILMILPISSSATLKEDEAAALLTWKASLDKRSQSLLSSWAGSSPCSNWTGISCDKASHVSHIILQSYGLKGIPFKEDTPKGGKNH	103	2950	https://onlinelibrary.wiley.com/doi/full/10.1111/pbi.13558
PlantKGA_431	Apiales	Araliaceae	Panax	notoginseng	Panax notoginseng		三七	chromosome	Yes	转录本	Pno08G006555t2	Pno08G006555t21288xxPlantKGA_431	Pno08G006555	L	partial	8	48013441	48022547	-	Pfam	PF13516	Leucine Rich repeat	Leucine-rich repeat	651	667	KNTNLEHLHLQGNKFTG	0.53	MEQSLKRKFVLFAFIILVSYLSGFEGCFEEERKGLLELKAFIGFGQSSTINNEFLFEDWIDDKEKNECCEWSRVTCNYTTGHVIKLSLERMYLALDPNLWLWSLNISLFLPFKELQNLTLSASNIYGWTQTKGLTPFPRLEILDLTWNSFGGSIPSFIWELSTLKVLYLTGTNFNGSLHVQGLTSFPQLEILDLSWNHFGGSIPSFIWELSTLKALYLSWSELNGSLPMQGFASLHHLEILDLSDNQFSGNIPPSIWSLSSLKVLSLARNELNGSLPMQGVCELKKLQELDFSYNNLEGTFPPCLNNLTSLRLLDLSKNRFTGNISPSLIASLTSLEYIDLSHNHFEGLFSFSSFANHSKLEVVEIRNDNAKFEVDTESIDWIPLFQLKSLVLSNCNLN…	1016	9107	https://onlinelibrary.wiley.com/doi/full/10.1111/pbi.13558
PlantKGA_431	Apiales	Araliaceae	Panax	notoginseng	Panax notoginseng		三七	chromosome	Yes	转录本	Pno08G006555t2	Pno08G006555t21288xxPlantKGA_431	Pno08G006555	L	partial	8	48013441	48022547	-	Pfam	PF13855	Leucine rich repeat	Leucine-rich repeat	825	880	LDLSCNNLTGEIPIQMGMLVWIHALNLSHNELTGSIPKLFSHLAQIESLDLSFNNL	9.3e-07	MEQSLKRKFVLFAFIILVSYLSGFEGCFEEERKGLLELKAFIGFGQSSTINNEFLFEDWIDDKEKNECCEWSRVTCNYTTGHVIKLSLERMYLALDPNLWLWSLNISLFLPFKELQNLTLSASNIYGWTQTKGLTPFPRLEILDLTWNSFGGSIPSFIWELSTLKVLYLTGTNFNGSLHVQGLTSFPQLEILDLSWNHFGGSIPSFIWELSTLKALYLSWSELNGSLPMQGFASLHHLEILDLSDNQFSGNIPPSIWSLSSLKVLSLARNELNGSLPMQGVCELKKLQELDFSYNNLEGTFPPCLNNLTSLRLLDLSKNRFTGNISPSLIASLTSLEYIDLSHNHFEGLFSFSSFANHSKLEVVEIRNDNAKFEVDTESIDWIPLFQLKSLVLSNCNLN…	1016	9107	https://onlinelibrary.wiley.com/doi/full/10.1111/pbi.13558
PlantKGA_431	Apiales	Araliaceae	Panax	notoginseng	Panax notoginseng		三七	chromosome	Yes	转录本	Pno08G006555t2	Pno08G006555t21288xxPlantKGA_431	Pno08G006555	L	partial	8	48013441	48022547	-	Pfam	PF13855	Leucine rich repeat	Leucine-rich repeat	212	272	TLKALYLSWSELNGSLPMQGFASLHHLEILDLSDNQFSGNIPPSIWSLSSLKVLSLARNEL	2.7e-06	MEQSLKRKFVLFAFIILVSYLSGFEGCFEEERKGLLELKAFIGFGQSSTINNEFLFEDWIDDKEKNECCEWSRVTCNYTTGHVIKLSLERMYLALDPNLWLWSLNISLFLPFKELQNLTLSASNIYGWTQTKGLTPFPRLEILDLTWNSFGGSIPSFIWELSTLKVLYLTGTNFNGSLHVQGLTSFPQLEILDLSWNHFGGSIPSFIWELSTLKALYLSWSELNGSLPMQGFASLHHLEILDLSDNQFSGNIPPSIWSLSSLKVLSLARNELNGSLPMQGVCELKKLQELDFSYNNLEGTFPPCLNNLTSLRLLDLSKNRFTGNISPSLIASLTSLEYIDLSHNHFEGLFSFSSFANHSKLEVVEIRNDNAKFEVDTESIDWIPLFQLKSLVLSNCNLN…	1016	9107	https://onlinelibrary.wiley.com/doi/full/10.1111/pbi.13558
PlantKGA_431	Apiales	Araliaceae	Panax	notoginseng	Panax notoginseng		三七	chromosome	Yes	转录本	Pno08G006555t2	Pno08G006555t21288xxPlantKGA_431	Pno08G006555	L	partial	8	48013441	48022547	-	Pfam	PF13855	Leucine rich repeat	Leucine-rich repeat	286	346	KLQELDFSYNNLEGTFPPCLNNLTSLRLLDLSKNRFTGNISPSLIASLTSLEYIDLSHNHF	2.6e-09	MEQSLKRKFVLFAFIILVSYLSGFEGCFEEERKGLLELKAFIGFGQSSTINNEFLFEDWIDDKEKNECCEWSRVTCNYTTGHVIKLSLERMYLALDPNLWLWSLNISLFLPFKELQNLTLSASNIYGWTQTKGLTPFPRLEILDLTWNSFGGSIPSFIWELSTLKVLYLTGTNFNGSLHVQGLTSFPQLEILDLSWNHFGGSIPSFIWELSTLKALYLSWSELNGSLPMQGFASLHHLEILDLSDNQFSGNIPPSIWSLSSLKVLSLARNELNGSLPMQGVCELKKLQELDFSYNNLEGTFPPCLNNLTSLRLLDLSKNRFTGNISPSLIASLTSLEYIDLSHNHFEGLFSFSSFANHSKLEVVEIRNDNAKFEVDTESIDWIPLFQLKSLVLSNCNLN…	1016	9107	https://onlinelibrary.wiley.com/doi/full/10.1111/pbi.13558
PlantKGA_431	Apiales	Araliaceae	Panax	notoginseng	Panax notoginseng		三七	chromosome	Yes	转录本	Pno08G006555t2	Pno08G006555t21288xxPlantKGA_431	Pno08G006555	L	partial	8	48013441	48022547	-	Pfam	PF00560	Leucine Rich Repeat	Leucine-rich repeat	188	206	QLEILDLSWNHFGGSIPSF	1.4	MEQSLKRKFVLFAFIILVSYLSGFEGCFEEERKGLLELKAFIGFGQSSTINNEFLFEDWIDDKEKNECCEWSRVTCNYTTGHVIKLSLERMYLALDPNLWLWSLNISLFLPFKELQNLTLSASNIYGWTQTKGLTPFPRLEILDLTWNSFGGSIPSFIWELSTLKVLYLTGTNFNGSLHVQGLTSFPQLEILDLSWNHFGGSIPSFIWELSTLKALYLSWSELNGSLPMQGFASLHHLEILDLSDNQFSGNIPPSIWSLSSLKVLSLARNELNGSLPMQGVCELKKLQELDFSYNNLEGTFPPCLNNLTSLRLLDLSKNRFTGNISPSLIASLTSLEYIDLSHNHFEGLFSFSSFANHSKLEVVEIRNDNAKFEVDTESIDWIPLFQLKSLVLSNCNLN…	1016	9107	https://onlinelibrary.wiley.com/doi/full/10.1111/pbi.13558
PlantKGA_431	Apiales	Araliaceae	Panax	notoginseng	Panax notoginseng		三七	chromosome	Yes	转录本	Pno08G008254t2	Pno08G008254t21288xxPlantKGA_431	Pno08G008254	L	partial	8	5827347	5840231	-	Pfam	PF13516	Leucine Rich repeat	Leucine-rich repeat	507	530	YNNTISTLDLRANGLRDDGAICLA	0.0089	MGYTSTLSLYSNPKTSLGDHRLKHDVRGNFLNSSERYCTMEVLYTSKRRCGFLPFRSFAIRAASASGRPARNGRRAYNQSQSQAPLPAVALKEVASFVVPVGTFVVVTFVLWKLVEKVLLPKPSKTSSGEKKSETQGMKWSFAPGTNLLTGFGAKIEKESKQRLNEFAKELRSFRNVDMSGRNFGDEGLFFLAESLAYNQTAEEVNFSANGITGDGLKAFDGVLQSNIVLKTLNLSGNAIGDEGVKSLCDILVDNSGIQKLQLNSTGLGDEGAKAIAEILKRNSSLRVLELNNNLIDYSGFSSLAGSLLENKTIQTIYLNGNYGGALGAAALAKGLEGNKSLRELYLHGNSIGDEGVRALMSGLSSHKGKLTALDIGNNAISSKGAFHVAEFIKRSKSL…	607	12885	https://onlinelibrary.wiley.com/doi/full/10.1111/pbi.13558
PlantKGA_431	Apiales	Araliaceae	Panax	notoginseng	Panax notoginseng		三七	chromosome	Yes	转录本	Pno08G008254t2	Pno08G008254t21288xxPlantKGA_431	Pno08G008254	L	partial	8	5827347	5840231	-	Pfam	PF13516	Leucine Rich repeat	Leucine-rich repeat	370	389	KLTALDIGNNAISSKGAFHV	0.28	MGYTSTLSLYSNPKTSLGDHRLKHDVRGNFLNSSERYCTMEVLYTSKRRCGFLPFRSFAIRAASASGRPARNGRRAYNQSQSQAPLPAVALKEVASFVVPVGTFVVVTFVLWKLVEKVLLPKPSKTSSGEKKSETQGMKWSFAPGTNLLTGFGAKIEKESKQRLNEFAKELRSFRNVDMSGRNFGDEGLFFLAESLAYNQTAEEVNFSANGITGDGLKAFDGVLQSNIVLKTLNLSGNAIGDEGVKSLCDILVDNSGIQKLQLNSTGLGDEGAKAIAEILKRNSSLRVLELNNNLIDYSGFSSLAGSLLENKTIQTIYLNGNYGGALGAAALAKGLEGNKSLRELYLHGNSIGDEGVRALMSGLSSHKGKLTALDIGNNAISSKGAFHVAEFIKRSKSL…	607	12885	https://onlinelibrary.wiley.com/doi/full/10.1111/pbi.13558
PlantKGA_431	Apiales	Araliaceae	Panax	notoginseng	Panax notoginseng		三七	chromosome	Yes	转录本	Pno08G008254t2	Pno08G008254t21288xxPlantKGA_431	Pno08G008254	L	partial	8	5827347	5840231	-	Pfam	PF13516	Leucine Rich repeat	Leucine-rich repeat	283	305	NSSLRVLELNNNLIDYSGFSSLA	0.65	MGYTSTLSLYSNPKTSLGDHRLKHDVRGNFLNSSERYCTMEVLYTSKRRCGFLPFRSFAIRAASASGRPARNGRRAYNQSQSQAPLPAVALKEVASFVVPVGTFVVVTFVLWKLVEKVLLPKPSKTSSGEKKSETQGMKWSFAPGTNLLTGFGAKIEKESKQRLNEFAKELRSFRNVDMSGRNFGDEGLFFLAESLAYNQTAEEVNFSANGITGDGLKAFDGVLQSNIVLKTLNLSGNAIGDEGVKSLCDILVDNSGIQKLQLNSTGLGDEGAKAIAEILKRNSSLRVLELNNNLIDYSGFSSLAGSLLENKTIQTIYLNGNYGGALGAAALAKGLEGNKSLRELYLHGNSIGDEGVRALMSGLSSHKGKLTALDIGNNAISSKGAFHVAEFIKRSKSL…	607	12885	https://onlinelibrary.wiley.com/doi/full/10.1111/pbi.13558
PlantKGA_431	Apiales	Araliaceae	Panax	notoginseng	Panax notoginseng		三七	chromosome	Yes	转录本	Pno08G008254t2	Pno08G008254t21288xxPlantKGA_431	Pno08G008254	L	partial	8	5827347	5840231	-	Pfam	PF13516	Leucine Rich repeat	Leucine-rich repeat	227	249	NIVLKTLNLSGNAIGDEGVKSLC	2.5e-06	MGYTSTLSLYSNPKTSLGDHRLKHDVRGNFLNSSERYCTMEVLYTSKRRCGFLPFRSFAIRAASASGRPARNGRRAYNQSQSQAPLPAVALKEVASFVVPVGTFVVVTFVLWKLVEKVLLPKPSKTSSGEKKSETQGMKWSFAPGTNLLTGFGAKIEKESKQRLNEFAKELRSFRNVDMSGRNFGDEGLFFLAESLAYNQTAEEVNFSANGITGDGLKAFDGVLQSNIVLKTLNLSGNAIGDEGVKSLCDILVDNSGIQKLQLNSTGLGDEGAKAIAEILKRNSSLRVLELNNNLIDYSGFSSLAGSLLENKTIQTIYLNGNYGGALGAAALAKGLEGNKSLRELYLHGNSIGDEGVRALMSGLSSHKGKLTALDIGNNAISSKGAFHVAEFIKRSKSL…	607	12885	https://onlinelibrary.wiley.com/doi/full/10.1111/pbi.13558
PlantKGA_431	Apiales	Araliaceae	Panax	notoginseng	Panax notoginseng		三七	chromosome	Yes	转录本	Pno08G008254t2	Pno08G008254t21288xxPlantKGA_431	Pno08G008254	L	partial	8	5827347	5840231	-	Pfam	PF13516	Leucine Rich repeat	Leucine-rich repeat	540	559	LISLDLGFNEIRDEGAFSIS	0.0075	MGYTSTLSLYSNPKTSLGDHRLKHDVRGNFLNSSERYCTMEVLYTSKRRCGFLPFRSFAIRAASASGRPARNGRRAYNQSQSQAPLPAVALKEVASFVVPVGTFVVVTFVLWKLVEKVLLPKPSKTSSGEKKSETQGMKWSFAPGTNLLTGFGAKIEKESKQRLNEFAKELRSFRNVDMSGRNFGDEGLFFLAESLAYNQTAEEVNFSANGITGDGLKAFDGVLQSNIVLKTLNLSGNAIGDEGVKSLCDILVDNSGIQKLQLNSTGLGDEGAKAIAEILKRNSSLRVLELNNNLIDYSGFSSLAGSLLENKTIQTIYLNGNYGGALGAAALAKGLEGNKSLRELYLHGNSIGDEGVRALMSGLSSHKGKLTALDIGNNAISSKGAFHVAEFIKRSKSL…	607	12885	https://onlinelibrary.wiley.com/doi/full/10.1111/pbi.13558
PlantKGA_431	Apiales	Araliaceae	Panax	notoginseng	Panax notoginseng		三七	chromosome	Yes	转录本	Pno08G008254t2	Pno08G008254t21288xxPlantKGA_431	Pno08G008254	L	partial	8	5827347	5840231	-	Pfam	PF13516	Leucine Rich repeat	Leucine-rich repeat	452	474	NTVIETLELGYNPIGPDGAKALS	0.003	MGYTSTLSLYSNPKTSLGDHRLKHDVRGNFLNSSERYCTMEVLYTSKRRCGFLPFRSFAIRAASASGRPARNGRRAYNQSQSQAPLPAVALKEVASFVVPVGTFVVVTFVLWKLVEKVLLPKPSKTSSGEKKSETQGMKWSFAPGTNLLTGFGAKIEKESKQRLNEFAKELRSFRNVDMSGRNFGDEGLFFLAESLAYNQTAEEVNFSANGITGDGLKAFDGVLQSNIVLKTLNLSGNAIGDEGVKSLCDILVDNSGIQKLQLNSTGLGDEGAKAIAEILKRNSSLRVLELNNNLIDYSGFSSLAGSLLENKTIQTIYLNGNYGGALGAAALAKGLEGNKSLRELYLHGNSIGDEGVRALMSGLSSHKGKLTALDIGNNAISSKGAFHVAEFIKRSKSL…	607	12885	https://onlinelibrary.wiley.com/doi/full/10.1111/pbi.13558
PlantKGA_431	Apiales	Araliaceae	Panax	notoginseng	Panax notoginseng		三七	chromosome	Yes	转录本	Pno08G008254t2	Pno08G008254t21288xxPlantKGA_431	Pno08G008254	L	partial	8	5827347	5840231	-	Pfam	PF13516	Leucine Rich repeat	Leucine-rich repeat	483	502	IKTLMLGWCQIGAKGAEYIA	0.16	MGYTSTLSLYSNPKTSLGDHRLKHDVRGNFLNSSERYCTMEVLYTSKRRCGFLPFRSFAIRAASASGRPARNGRRAYNQSQSQAPLPAVALKEVASFVVPVGTFVVVTFVLWKLVEKVLLPKPSKTSSGEKKSETQGMKWSFAPGTNLLTGFGAKIEKESKQRLNEFAKELRSFRNVDMSGRNFGDEGLFFLAESLAYNQTAEEVNFSANGITGDGLKAFDGVLQSNIVLKTLNLSGNAIGDEGVKSLCDILVDNSGIQKLQLNSTGLGDEGAKAIAEILKRNSSLRVLELNNNLIDYSGFSSLAGSLLENKTIQTIYLNGNYGGALGAAALAKGLEGNKSLRELYLHGNSIGDEGVRALMSGLSSHKGKLTALDIGNNAISSKGAFHVAEFIKRSKSL…	607	12885	https://onlinelibrary.wiley.com/doi/full/10.1111/pbi.13558
PlantKGA_431	Apiales	Araliaceae	Panax	notoginseng	Panax notoginseng		三七	chromosome	Yes	转录本	Pno08G008254t2	Pno08G008254t21288xxPlantKGA_431	Pno08G008254	L	partial	8	5827347	5840231	-	Pfam	PF13516	Leucine Rich repeat	Leucine-rich repeat	339	361	NKSLRELYLHGNSIGDEGVRALM	0.002	MGYTSTLSLYSNPKTSLGDHRLKHDVRGNFLNSSERYCTMEVLYTSKRRCGFLPFRSFAIRAASASGRPARNGRRAYNQSQSQAPLPAVALKEVASFVVPVGTFVVVTFVLWKLVEKVLLPKPSKTSSGEKKSETQGMKWSFAPGTNLLTGFGAKIEKESKQRLNEFAKELRSFRNVDMSGRNFGDEGLFFLAESLAYNQTAEEVNFSANGITGDGLKAFDGVLQSNIVLKTLNLSGNAIGDEGVKSLCDILVDNSGIQKLQLNSTGLGDEGAKAIAEILKRNSSLRVLELNNNLIDYSGFSSLAGSLLENKTIQTIYLNGNYGGALGAAALAKGLEGNKSLRELYLHGNSIGDEGVRALMSGLSSHKGKLTALDIGNNAISSKGAFHVAEFIKRSKSL…	607	12885	https://onlinelibrary.wiley.com/doi/full/10.1111/pbi.13558
PlantKGA_431	Apiales	Araliaceae	Panax	notoginseng	Panax notoginseng		三七	chromosome	Yes	转录本	Pno08G008254t2	Pno08G008254t21288xxPlantKGA_431	Pno08G008254	L	partial	8	5827347	5840231	-	Pfam	PF13516	Leucine Rich repeat	Leucine-rich repeat	424	446	NRTITNIDLGGNDIHAKGVTELA	0.099	MGYTSTLSLYSNPKTSLGDHRLKHDVRGNFLNSSERYCTMEVLYTSKRRCGFLPFRSFAIRAASASGRPARNGRRAYNQSQSQAPLPAVALKEVASFVVPVGTFVVVTFVLWKLVEKVLLPKPSKTSSGEKKSETQGMKWSFAPGTNLLTGFGAKIEKESKQRLNEFAKELRSFRNVDMSGRNFGDEGLFFLAESLAYNQTAEEVNFSANGITGDGLKAFDGVLQSNIVLKTLNLSGNAIGDEGVKSLCDILVDNSGIQKLQLNSTGLGDEGAKAIAEILKRNSSLRVLELNNNLIDYSGFSSLAGSLLENKTIQTIYLNGNYGGALGAAALAKGLEGNKSLRELYLHGNSIGDEGVRALMSGLSSHKGKLTALDIGNNAISSKGAFHVAEFIKRSKSL…	607	12885	https://onlinelibrary.wiley.com/doi/full/10.1111/pbi.13558
PlantKGA_431	Apiales	Araliaceae	Panax	notoginseng	Panax notoginseng		三七	chromosome	Yes	转录本	Pno08G008254t2	Pno08G008254t21288xxPlantKGA_431	Pno08G008254	L	partial	8	5827347	5840231	-	Pfam	PF13516	Leucine Rich repeat	Leucine-rich repeat	402	418	LNVYMNDIGDEGAGKIA	0.67	MGYTSTLSLYSNPKTSLGDHRLKHDVRGNFLNSSERYCTMEVLYTSKRRCGFLPFRSFAIRAASASGRPARNGRRAYNQSQSQAPLPAVALKEVASFVVPVGTFVVVTFVLWKLVEKVLLPKPSKTSSGEKKSETQGMKWSFAPGTNLLTGFGAKIEKESKQRLNEFAKELRSFRNVDMSGRNFGDEGLFFLAESLAYNQTAEEVNFSANGITGDGLKAFDGVLQSNIVLKTLNLSGNAIGDEGVKSLCDILVDNSGIQKLQLNSTGLGDEGAKAIAEILKRNSSLRVLELNNNLIDYSGFSSLAGSLLENKTIQTIYLNGNYGGALGAAALAKGLEGNKSLRELYLHGNSIGDEGVRALMSGLSSHKGKLTALDIGNNAISSKGAFHVAEFIKRSKSL…	607	12885	https://onlinelibrary.wiley.com/doi/full/10.1111/pbi.13558
PlantKGA_431	Apiales	Araliaceae	Panax	notoginseng	Panax notoginseng		三七	chromosome	Yes	转录本	Pno08G008254t2	Pno08G008254t21288xxPlantKGA_431	Pno08G008254	L	partial	8	5827347	5840231	-	Pfam	PF13516	Leucine Rich repeat	Leucine-rich repeat	259	277	QKLQLNSTGLGDEGAKAIA	0.12	MGYTSTLSLYSNPKTSLGDHRLKHDVRGNFLNSSERYCTMEVLYTSKRRCGFLPFRSFAIRAASASGRPARNGRRAYNQSQSQAPLPAVALKEVASFVVPVGTFVVVTFVLWKLVEKVLLPKPSKTSSGEKKSETQGMKWSFAPGTNLLTGFGAKIEKESKQRLNEFAKELRSFRNVDMSGRNFGDEGLFFLAESLAYNQTAEEVNFSANGITGDGLKAFDGVLQSNIVLKTLNLSGNAIGDEGVKSLCDILVDNSGIQKLQLNSTGLGDEGAKAIAEILKRNSSLRVLELNNNLIDYSGFSSLAGSLLENKTIQTIYLNGNYGGALGAAALAKGLEGNKSLRELYLHGNSIGDEGVRALMSGLSSHKGKLTALDIGNNAISSKGAFHVAEFIKRSKSL…	607	12885	https://onlinelibrary.wiley.com/doi/full/10.1111/pbi.13558
PlantKGA_431	Apiales	Araliaceae	Panax	notoginseng	Panax notoginseng		三七	chromosome	Yes	转录本	Pno08G008791t1	Pno08G008791t11288xxPlantKGA_431	Pno08G008791	L	partial	8	6146259	6148716	+	Pfam	PF00560	Leucine Rich Repeat	Leucine-rich repeat	335	355	SLKILDLGHNDFCRLPSSLRG	1.6	MGNMISLVELLLDRTAIEKLPESIFRLTKLEILSLNDCQSLKRLPFCIGKLGSLRELSLNGCPLEEIPDSINGLGNLEELSLMHCRLLTVIPNSVGNLKSLTKIWLNGSSIIEMPASIGSLLYLKVLSVGNCRKISTLPVSIERLASIVELDLDGTSIINLPDQIGFLKSLQKLEMRNCTSLRWLPETIGNLLSLNTLIIVNAAIQELPETIGLLENLVMLRLNNCKRLCSLPASIGNLKSLHHLYMEKTAVSGLPESFGMLSSLMILKMGKERWSQVPQNAEVTTDAECPIVKEKPKLVVLPSTFSNLSMLEEFDACAWKITGEIADDFERLSSLKILDLGHNDFCRLPSSLRGLSFLEKLDLPHCKELQVLPPLPSSLVKLNAANCVALEIISDLSN…	666	2458	https://onlinelibrary.wiley.com/doi/full/10.1111/pbi.13558
PlantKGA_431	Apiales	Araliaceae	Panax	notoginseng	Panax notoginseng		三七	chromosome	Yes	转录本	Pno08G008791t1	Pno08G008791t11288xxPlantKGA_431	Pno08G008791	L	partial	8	6146259	6148716	+	Pfam	PF00560	Leucine Rich Repeat	Leucine-rich repeat	53	72	SLRELSLNGCPLEEIPDSIN	1.3	MGNMISLVELLLDRTAIEKLPESIFRLTKLEILSLNDCQSLKRLPFCIGKLGSLRELSLNGCPLEEIPDSINGLGNLEELSLMHCRLLTVIPNSVGNLKSLTKIWLNGSSIIEMPASIGSLLYLKVLSVGNCRKISTLPVSIERLASIVELDLDGTSIINLPDQIGFLKSLQKLEMRNCTSLRWLPETIGNLLSLNTLIIVNAAIQELPETIGLLENLVMLRLNNCKRLCSLPASIGNLKSLHHLYMEKTAVSGLPESFGMLSSLMILKMGKERWSQVPQNAEVTTDAECPIVKEKPKLVVLPSTFSNLSMLEEFDACAWKITGEIADDFERLSSLKILDLGHNDFCRLPSSLRGLSFLEKLDLPHCKELQVLPPLPSSLVKLNAANCVALEIISDLSN…	666	2458	https://onlinelibrary.wiley.com/doi/full/10.1111/pbi.13558
PlantKGA_431	Apiales	Araliaceae	Panax	notoginseng	Panax notoginseng		三七	chromosome	Yes	转录本	Pno08G008903t1	Pno08G008903t11288xxPlantKGA_431	Pno08G008903	L	partial	8	6217552	6219652	-	Pfam	PF08263	Leucine rich repeat N-terminal domain	Leucine-rich repeat-containing N-terminal, plant-type	42	80	PNDLKGLRHFKAAIHSDTSGRLATWTGQSCCKWSGISCD	3.9e-08	MRSSSIRPGRMGSDILWVLVMITLITVGESSKRGTGSEACNPNDLKGLRHFKAAIHSDTSGRLATWTGQSCCKWSGISCDNKTRRVNEMNLPGFITSGEAPDQTYMYGRLSPSITLLTCLQVIDLSGLYFLTGQIPPSIGFDLPKLHKLSLFYNKLSGPLPESIGKLSHLEELYLHENSFSKSLPSSLGSLTNLRILDLQHNRFSGAIPESITKLTNMEYLNIEQNYLTGHIPAAIGDLQVLTDLSLSNNSLTGKIPPSITNLTTIASISLDTNRLEGEIPFPSTSGQMSSLKFLRLHDNLLSGRIPSTFGLLTSLERVSLSNNKLKGPLPSSLGNLRSLSELYLDGNQLSGHIPRSIGQLSQLLELTISGNKIQGLLPHEMLMLQNLQTLDASYNQLN…	655	2101	https://onlinelibrary.wiley.com/doi/full/10.1111/pbi.13558
PlantKGA_431	Apiales	Araliaceae	Panax	notoginseng	Panax notoginseng		三七	chromosome	Yes	转录本	Pno08G008903t1	Pno08G008903t11288xxPlantKGA_431	Pno08G008903	L	partial	8	6217552	6219652	-	Pfam	PF13855	Leucine rich repeat	Leucine-rich repeat	436	495	SLQALDLSANHLSGSIPTWFGNLTQLWSLNLSENSLISKIPITITNLGRLGVLDIHANKL	2.9e-08	MRSSSIRPGRMGSDILWVLVMITLITVGESSKRGTGSEACNPNDLKGLRHFKAAIHSDTSGRLATWTGQSCCKWSGISCDNKTRRVNEMNLPGFITSGEAPDQTYMYGRLSPSITLLTCLQVIDLSGLYFLTGQIPPSIGFDLPKLHKLSLFYNKLSGPLPESIGKLSHLEELYLHENSFSKSLPSSLGSLTNLRILDLQHNRFSGAIPESITKLTNMEYLNIEQNYLTGHIPAAIGDLQVLTDLSLSNNSLTGKIPPSITNLTTIASISLDTNRLEGEIPFPSTSGQMSSLKFLRLHDNLLSGRIPSTFGLLTSLERVSLSNNKLKGPLPSSLGNLRSLSELYLDGNQLSGHIPRSIGQLSQLLELTISGNKIQGLLPHEMLMLQNLQTLDASYNQLN…	655	2101	https://onlinelibrary.wiley.com/doi/full/10.1111/pbi.13558
PlantKGA_431	Apiales	Araliaceae	Panax	notoginseng	Panax notoginseng		三七	chromosome	Yes	转录本	Pno08G008903t1	Pno08G008903t11288xxPlantKGA_431	Pno08G008903	L	partial	8	6217552	6219652	-	Pfam	PF13855	Leucine rich repeat	Leucine-rich repeat	291	350	SLKFLRLHDNLLSGRIPSTFGLLTSLERVSLSNNKLKGPLPSSLGNLRSLSELYLDGNQL	1.1e-07	MRSSSIRPGRMGSDILWVLVMITLITVGESSKRGTGSEACNPNDLKGLRHFKAAIHSDTSGRLATWTGQSCCKWSGISCDNKTRRVNEMNLPGFITSGEAPDQTYMYGRLSPSITLLTCLQVIDLSGLYFLTGQIPPSIGFDLPKLHKLSLFYNKLSGPLPESIGKLSHLEELYLHENSFSKSLPSSLGSLTNLRILDLQHNRFSGAIPESITKLTNMEYLNIEQNYLTGHIPAAIGDLQVLTDLSLSNNSLTGKIPPSITNLTTIASISLDTNRLEGEIPFPSTSGQMSSLKFLRLHDNLLSGRIPSTFGLLTSLERVSLSNNKLKGPLPSSLGNLRSLSELYLDGNQLSGHIPRSIGQLSQLLELTISGNKIQGLLPHEMLMLQNLQTLDASYNQLN…	655	2101	https://onlinelibrary.wiley.com/doi/full/10.1111/pbi.13558
PlantKGA_431	Apiales	Araliaceae	Panax	notoginseng	Panax notoginseng		三七	chromosome	Yes	转录本	Pno08G008903t1	Pno08G008903t11288xxPlantKGA_431	Pno08G008903	L	partial	8	6217552	6219652	-	Pfam	PF13855	Leucine rich repeat	Leucine-rich repeat	192	252	TNLRILDLQHNRFSGAIPESITKLTNMEYLNIEQNYLTGHIPAAIGDLQVLTDLSLSNNSL	9.4e-10	MRSSSIRPGRMGSDILWVLVMITLITVGESSKRGTGSEACNPNDLKGLRHFKAAIHSDTSGRLATWTGQSCCKWSGISCDNKTRRVNEMNLPGFITSGEAPDQTYMYGRLSPSITLLTCLQVIDLSGLYFLTGQIPPSIGFDLPKLHKLSLFYNKLSGPLPESIGKLSHLEELYLHENSFSKSLPSSLGSLTNLRILDLQHNRFSGAIPESITKLTNMEYLNIEQNYLTGHIPAAIGDLQVLTDLSLSNNSLTGKIPPSITNLTTIASISLDTNRLEGEIPFPSTSGQMSSLKFLRLHDNLLSGRIPSTFGLLTSLERVSLSNNKLKGPLPSSLGNLRSLSELYLDGNQLSGHIPRSIGQLSQLLELTISGNKIQGLLPHEMLMLQNLQTLDASYNQLN…	655	2101	https://onlinelibrary.wiley.com/doi/full/10.1111/pbi.13558
PlantKGA_431	Apiales	Araliaceae	Panax	notoginseng	Panax notoginseng		三七	chromosome	Yes	转录本	Pno08G011074t1	Pno08G011074t11288xxPlantKGA_431	Pno08G011074	L	partial	8	7545769	7552289	-	Pfam	PF13855	Leucine rich repeat	Leucine-rich repeat	103	161	LTRLDLHNNKLTGPIPPQIGRLRRLKILNLRWNKLQDVIPPEIGELKSLTHLYVSFNNF	1.9e-08	MARQAPFSAFLFILVLFFLLTVGVHCKTIKRDVKALNEIKASLGWRVVYSWVGDDPCGDGDLPPWSGVTCTTQGDYRVVTALEVYAVSIVGPFPTAVTNLLDLTRLDLHNNKLTGPIPPQIGRLRRLKILNLRWNKLQDVIPPEIGELKSLTHLYVSFNNFKGEIPKELANLPDLQYLHLHENRFIGRIPPELGTLQNLRHLDVGNNHLVGTIRELIRIEGCFPVLRNLYLNNNYLTGGIPAQLANLTNLEILYLSYNKMSGIIPPGLAHIPRLTYLYLDHNQFSGRIPDAFYKHPFLKELYIEANAFRPGVNPIGVHQVLEVSDSDFLF	330	6521	https://onlinelibrary.wiley.com/doi/full/10.1111/pbi.13558
PlantKGA_431	Apiales	Araliaceae	Panax	notoginseng	Panax notoginseng		三七	chromosome	Yes	转录本	Pno08G011074t1	Pno08G011074t11288xxPlantKGA_431	Pno08G011074	L	partial	8	7545769	7552289	-	Pfam	PF13855	Leucine rich repeat	Leucine-rich repeat	225	284	VLRNLYLNNNYLTGGIPAQLANLTNLEILYLSYNKMSGIIPPGLAHIPRLTYLYLDHNQF	1.1e-13	MARQAPFSAFLFILVLFFLLTVGVHCKTIKRDVKALNEIKASLGWRVVYSWVGDDPCGDGDLPPWSGVTCTTQGDYRVVTALEVYAVSIVGPFPTAVTNLLDLTRLDLHNNKLTGPIPPQIGRLRRLKILNLRWNKLQDVIPPEIGELKSLTHLYVSFNNFKGEIPKELANLPDLQYLHLHENRFIGRIPPELGTLQNLRHLDVGNNHLVGTIRELIRIEGCFPVLRNLYLNNNYLTGGIPAQLANLTNLEILYLSYNKMSGIIPPGLAHIPRLTYLYLDHNQFSGRIPDAFYKHPFLKELYIEANAFRPGVNPIGVHQVLEVSDSDFLF	330	6521	https://onlinelibrary.wiley.com/doi/full/10.1111/pbi.13558
PlantKGA_431	Apiales	Araliaceae	Panax	notoginseng	Panax notoginseng		三七	chromosome	Yes	转录本	Pno08G011074t1	Pno08G011074t11288xxPlantKGA_431	Pno08G011074	L	partial	8	7545769	7552289	-	Pfam	PF00560	Leucine Rich Repeat	Leucine-rich repeat	198	210	NLRHLDVGNNHLV	0.67	MARQAPFSAFLFILVLFFLLTVGVHCKTIKRDVKALNEIKASLGWRVVYSWVGDDPCGDGDLPPWSGVTCTTQGDYRVVTALEVYAVSIVGPFPTAVTNLLDLTRLDLHNNKLTGPIPPQIGRLRRLKILNLRWNKLQDVIPPEIGELKSLTHLYVSFNNFKGEIPKELANLPDLQYLHLHENRFIGRIPPELGTLQNLRHLDVGNNHLVGTIRELIRIEGCFPVLRNLYLNNNYLTGGIPAQLANLTNLEILYLSYNKMSGIIPPGLAHIPRLTYLYLDHNQFSGRIPDAFYKHPFLKELYIEANAFRPGVNPIGVHQVLEVSDSDFLF	330	6521	https://onlinelibrary.wiley.com/doi/full/10.1111/pbi.13558
PlantKGA_431	Apiales	Araliaceae	Panax	notoginseng	Panax notoginseng		三七	chromosome	Yes	转录本	Pno08G011074t1	Pno08G011074t11288xxPlantKGA_431	Pno08G011074	L	partial	8	7545769	7552289	-	Pfam	PF08263	Leucine rich repeat N-terminal domain	Leucine-rich repeat-containing N-terminal, plant-type	30	70	KRDVKALNEIKASLGWRVVYSWVGDDPCGDGDLPPWSGVTC	0.0002	MARQAPFSAFLFILVLFFLLTVGVHCKTIKRDVKALNEIKASLGWRVVYSWVGDDPCGDGDLPPWSGVTCTTQGDYRVVTALEVYAVSIVGPFPTAVTNLLDLTRLDLHNNKLTGPIPPQIGRLRRLKILNLRWNKLQDVIPPEIGELKSLTHLYVSFNNFKGEIPKELANLPDLQYLHLHENRFIGRIPPELGTLQNLRHLDVGNNHLVGTIRELIRIEGCFPVLRNLYLNNNYLTGGIPAQLANLTNLEILYLSYNKMSGIIPPGLAHIPRLTYLYLDHNQFSGRIPDAFYKHPFLKELYIEANAFRPGVNPIGVHQVLEVSDSDFLF	330	6521	https://onlinelibrary.wiley.com/doi/full/10.1111/pbi.13558
PlantKGA_431	Apiales	Araliaceae	Panax	notoginseng	Panax notoginseng		三七	chromosome	Yes	转录本	Pno08G013357t1	Pno08G013357t11288xxPlantKGA_431	Pno08G013357	L	partial	8	8841367	8844817	-	Pfam	PF13855	Leucine rich repeat	Leucine-rich repeat	265	303	ANLKNLTLLDLSNNKFSGGLTKSFQEMSSLEELVLSGNP	9.2e-07	MQMKNIRKISCASCIIIFILYLSASWCNGEESETVGALMEKREQEALYSAIQGFVGKWWNGSDLYPDPCGWTPIQGVSCDIFDGYWYVTTLNIGPIHDNSLGCASNVGFNPHLFALKHLKSLVFFNCMVHERHPITIPTHKWGELAGSLESLELRSNPGLNGPLPSTFGGLRKLKSLVLLENGLSGEIPTNVGNLTNLKRLVLSGNQFTGQVPRNFGGLSELLILDLSRNSLSGTLPSTFGGLGSLLKLDLSNNQLVGNIPREIANLKNLTLLDLSNNKFSGGLTKSFQEMSSLEELVLSGNPNFGGDLMGLEWHNLRGLTILDLSNMGLTGGIPESIAELKRLRFLGLNDNNLTGDISPKLAALPNVSSIYINGNNLTGELKFSELFYGKMGRRFGAW…	482	3451	https://onlinelibrary.wiley.com/doi/full/10.1111/pbi.13558
PlantKGA_431	Apiales	Araliaceae	Panax	notoginseng	Panax notoginseng		三七	chromosome	Yes	转录本	Pno08G013357t1	Pno08G013357t11288xxPlantKGA_431	Pno08G013357	L	partial	8	8841367	8844817	-	Pfam	PF13855	Leucine rich repeat	Leucine-rich repeat	196	256	TNLKRLVLSGNQFTGQVPRNFGGLSELLILDLSRNSLSGTLPSTFGGLGSLLKLDLSNNQL	6.2e-11	MQMKNIRKISCASCIIIFILYLSASWCNGEESETVGALMEKREQEALYSAIQGFVGKWWNGSDLYPDPCGWTPIQGVSCDIFDGYWYVTTLNIGPIHDNSLGCASNVGFNPHLFALKHLKSLVFFNCMVHERHPITIPTHKWGELAGSLESLELRSNPGLNGPLPSTFGGLRKLKSLVLLENGLSGEIPTNVGNLTNLKRLVLSGNQFTGQVPRNFGGLSELLILDLSRNSLSGTLPSTFGGLGSLLKLDLSNNQLVGNIPREIANLKNLTLLDLSNNKFSGGLTKSFQEMSSLEELVLSGNPNFGGDLMGLEWHNLRGLTILDLSNMGLTGGIPESIAELKRLRFLGLNDNNLTGDISPKLAALPNVSSIYINGNNLTGELKFSELFYGKMGRRFGAW…	482	3451	https://onlinelibrary.wiley.com/doi/full/10.1111/pbi.13558
PlantKGA_431	Apiales	Araliaceae	Panax	notoginseng	Panax notoginseng		三七	chromosome	Yes	转录本	Pno08G013936t1	Pno08G013936t11288xxPlantKGA_431	Pno08G013936	L	partial	8	92069991	92072682	-	Pfam	PF13855	Leucine rich repeat	Leucine-rich repeat	569	628	SLVGIDLSDNLLHGEIPSGLFGLHGLEHLNLSYNFLDGQIPQSLVRMWSLRALDLSHNSL	4.7e-09	MEERWVLPFQTCEKSPSLQIVKLLLIIMLFLLNPSPIFTVSVYNVDNVDVQDINSLLLFKSQLQDPTQSLSSWVGSKCTNLTGLGCSNWTGRVISLNLTSLNLSGQVNPVLCKLSLLETLILSHNNFDGSIPPCFGAFWNLKTLDISHNLFKGVVPGTLVKLNRLRELDLSHNYFDGMIPMWIGNFSVKLEKIDLGFNLFSGEIAESLTCLESLKYLDLSHNYLLGNLCDFGQPLVYLNLESNLFSGTLPCLSSSAKSLSVLNVANNSIVGGIPTCISSLRALTQLNLSFNLLKYEISPRFVFSEKLVVLDLSFNELSGLLPSKIVKTTEKSGLLLLDLSHNRFSGDIPLTITELKSLQALFLSNNLLTGEIPVRIGNLTYLQVIDLSHNSLSGSIPLN…	747	2692	https://onlinelibrary.wiley.com/doi/full/10.1111/pbi.13558
PlantKGA_431	Apiales	Araliaceae	Panax	notoginseng	Panax notoginseng		三七	chromosome	Yes	转录本	Pno08G013936t1	Pno08G013936t11288xxPlantKGA_431	Pno08G013936	L	partial	8	92069991	92072682	-	Pfam	PF13855	Leucine rich repeat	Leucine-rich repeat	117	174	LETLILSHNNFDGSIPPCFGAFWNLKTLDISHNLFKGVVPGTLVKLNRLRELDLSHNY	7e-12	MEERWVLPFQTCEKSPSLQIVKLLLIIMLFLLNPSPIFTVSVYNVDNVDVQDINSLLLFKSQLQDPTQSLSSWVGSKCTNLTGLGCSNWTGRVISLNLTSLNLSGQVNPVLCKLSLLETLILSHNNFDGSIPPCFGAFWNLKTLDISHNLFKGVVPGTLVKLNRLRELDLSHNYFDGMIPMWIGNFSVKLEKIDLGFNLFSGEIAESLTCLESLKYLDLSHNYLLGNLCDFGQPLVYLNLESNLFSGTLPCLSSSAKSLSVLNVANNSIVGGIPTCISSLRALTQLNLSFNLLKYEISPRFVFSEKLVVLDLSFNELSGLLPSKIVKTTEKSGLLLLDLSHNRFSGDIPLTITELKSLQALFLSNNLLTGEIPVRIGNLTYLQVIDLSHNSLSGSIPLN…	747	2692	https://onlinelibrary.wiley.com/doi/full/10.1111/pbi.13558
PlantKGA_431	Apiales	Araliaceae	Panax	notoginseng	Panax notoginseng		三七	chromosome	Yes	转录本	Pno08G013936t1	Pno08G013936t11288xxPlantKGA_431	Pno08G013936	L	partial	8	92069991	92072682	-	Pfam	PF13855	Leucine rich repeat	Leucine-rich repeat	429	488	SLKILDISNNKISGEIPLTLAGCKSLEVVDFSSNNLSGSLHDAITKWSNLRYLSLARNKF	2.3e-07	MEERWVLPFQTCEKSPSLQIVKLLLIIMLFLLNPSPIFTVSVYNVDNVDVQDINSLLLFKSQLQDPTQSLSSWVGSKCTNLTGLGCSNWTGRVISLNLTSLNLSGQVNPVLCKLSLLETLILSHNNFDGSIPPCFGAFWNLKTLDISHNLFKGVVPGTLVKLNRLRELDLSHNYFDGMIPMWIGNFSVKLEKIDLGFNLFSGEIAESLTCLESLKYLDLSHNYLLGNLCDFGQPLVYLNLESNLFSGTLPCLSSSAKSLSVLNVANNSIVGGIPTCISSLRALTQLNLSFNLLKYEISPRFVFSEKLVVLDLSFNELSGLLPSKIVKTTEKSGLLLLDLSHNRFSGDIPLTITELKSLQALFLSNNLLTGEIPVRIGNLTYLQVIDLSHNSLSGSIPLN…	747	2692	https://onlinelibrary.wiley.com/doi/full/10.1111/pbi.13558
PlantKGA_431	Apiales	Araliaceae	Panax	notoginseng	Panax notoginseng		三七	chromosome	Yes	转录本	Pno09G000528t1	Pno09G000528t11288xxPlantKGA_431	Pno09G000528	L	partial	9	109123072	109124500	-	Pfam	PF08263	Leucine rich repeat N-terminal domain	Leucine-rich repeat-containing N-terminal, plant-type	27	64	PKDKKVLLQIKQSLNNPYHLASWNPDNDCCDWYALECD	3.4e-10	MNTSLSFFPILFLFLLPSPSLSDRCNPKDKKVLLQIKQSLNNPYHLASWNPDNDCCDWYALECDLKTNRVNALTIFSGNISGQIPAAVGDLPYLETLIFRHLTNVTGQIPSAISKLSHLKMVRLSWTNLTGPVPTFFSQLKTLTYLDLSFNQLTGSIPPSLSLLPNLGALHLDRNRLTGNIPDSFGNFAGEIPDLYLSHNQLTGSVPKSLGRTNFSRIDLSRNKLEGDISFLFGANKAMQIGDFSRNLFKFNFSKVEEFPVDLISLDLNHNGIYGSLPVGLAAIDLQFFNVSYNRLCGHIPSGGKLQSFDYSVYFHNRCLCGAPLPAC	328	1429	https://onlinelibrary.wiley.com/doi/full/10.1111/pbi.13558
PlantKGA_431	Apiales	Araliaceae	Panax	notoginseng	Panax notoginseng		三七	chromosome	Yes	转录本	Pno09G000528t1	Pno09G000528t11288xxPlantKGA_431	Pno09G000528	L	partial	9	109123072	109124500	-	Pfam	PF13855	Leucine rich repeat	Leucine-rich repeat	117	177	SHLKMVRLSWTNLTGPVPTFFSQLKTLTYLDLSFNQLTGSIPPSLSLLPNLGALHLDRNRL	2e-08	MNTSLSFFPILFLFLLPSPSLSDRCNPKDKKVLLQIKQSLNNPYHLASWNPDNDCCDWYALECDLKTNRVNALTIFSGNISGQIPAAVGDLPYLETLIFRHLTNVTGQIPSAISKLSHLKMVRLSWTNLTGPVPTFFSQLKTLTYLDLSFNQLTGSIPPSLSLLPNLGALHLDRNRLTGNIPDSFGNFAGEIPDLYLSHNQLTGSVPKSLGRTNFSRIDLSRNKLEGDISFLFGANKAMQIGDFSRNLFKFNFSKVEEFPVDLISLDLNHNGIYGSLPVGLAAIDLQFFNVSYNRLCGHIPSGGKLQSFDYSVYFHNRCLCGAPLPAC	328	1429	https://onlinelibrary.wiley.com/doi/full/10.1111/pbi.13558
PlantKGA_431	Apiales	Araliaceae	Panax	notoginseng	Panax notoginseng		三七	chromosome	Yes	转录本	Pno09G000531t1	Pno09G000531t11288xxPlantKGA_431	Pno09G000531	L	partial	9	109177108	109178356	-	Pfam	PF13855	Leucine rich repeat	Leucine-rich repeat	121	181	SNLKMVRLSWTNLTGPVPTFFSQLKNLTYLDLSFNQLTGSIPPSLSLLPNLGALHLDRNRL	1e-08	MTNNSLIYILCLLLISVLSLLPPTLSDRCNPKDKKVLLQIKQSLNNPYHLASWNPNNDCCDWYCLECDLKTNRVNALTIFSGNISGQIPAAVGDLPYLETLIFRHLTNVTGQIPSAIAKLSNLKMVRLSWTNLTGPVPTFFSQLKNLTYLDLSFNQLTGSIPPSLSLLPNLGALHLDRNRLTGNIPDSFGNFAGEVPDLYLSHNQLTGSVPKSFDRMNFTRIDLSRNKLEGDISFLFGANKAMQVGDFSRNLFKFDFSKVEFFPVDLISLDLNHNGIYGSLPLGLTAIDLQSFNVSYNRLCGQIPTGGKLRSFDYSVYFHNRCLCGAPLPPC	332	1249	https://onlinelibrary.wiley.com/doi/full/10.1111/pbi.13558
PlantKGA_431	Apiales	Araliaceae	Panax	notoginseng	Panax notoginseng		三七	chromosome	Yes	转录本	Pno09G000531t1	Pno09G000531t11288xxPlantKGA_431	Pno09G000531	L	partial	9	109177108	109178356	-	Pfam	PF08263	Leucine rich repeat N-terminal domain	Leucine-rich repeat-containing N-terminal, plant-type	31	68	PKDKKVLLQIKQSLNNPYHLASWNPNNDCCDWYCLECD	7.1e-10	MTNNSLIYILCLLLISVLSLLPPTLSDRCNPKDKKVLLQIKQSLNNPYHLASWNPNNDCCDWYCLECDLKTNRVNALTIFSGNISGQIPAAVGDLPYLETLIFRHLTNVTGQIPSAIAKLSNLKMVRLSWTNLTGPVPTFFSQLKNLTYLDLSFNQLTGSIPPSLSLLPNLGALHLDRNRLTGNIPDSFGNFAGEVPDLYLSHNQLTGSVPKSFDRMNFTRIDLSRNKLEGDISFLFGANKAMQVGDFSRNLFKFDFSKVEFFPVDLISLDLNHNGIYGSLPLGLTAIDLQSFNVSYNRLCGQIPTGGKLRSFDYSVYFHNRCLCGAPLPPC	332	1249	https://onlinelibrary.wiley.com/doi/full/10.1111/pbi.13558
PlantKGA_431	Apiales	Araliaceae	Panax	notoginseng	Panax notoginseng		三七	chromosome	Yes	转录本	Pno09G000920t1	Pno09G000920t11288xxPlantKGA_431	Pno09G000920	L	partial	9	115164730	115177371	-	Pfam	PF13855	Leucine rich repeat	Leucine-rich repeat	94	153	HLQYLEVYKNNIQGTIPTELGNLKSLISLDLYNNNISGTIPPSLGKLKSLVFLRLNDNHL	4.7e-08	MVGGFSTVAGAAVVAALTIIITVVNGNSEGHALYALRRSLTDPDNVLVSWDPNLVNPCTWFHVTCNQHNHVTRLDLGSSNLSGHLVPDLGKLEHLQYLEVYKNNIQGTIPTELGNLKSLISLDLYNNNISGTIPPSLGKLKSLVFLRLNDNHLVGRIPRDLVSISSLKVVDVSGNNLCGTIPTMGPFEHIPLNNFENNPRLEGPELLGLASYDTNCT	217	12642	https://onlinelibrary.wiley.com/doi/full/10.1111/pbi.13558
PlantKGA_431	Apiales	Araliaceae	Panax	notoginseng	Panax notoginseng		三七	chromosome	Yes	转录本	Pno09G000920t1	Pno09G000920t11288xxPlantKGA_431	Pno09G000920	L	partial	9	115164730	115177371	-	Pfam	PF08263	Leucine rich repeat N-terminal domain	Leucine-rich repeat-containing N-terminal, plant-type	27	66	NSEGHALYALRRSLTDPDNVLVSWDPNLVNPCTWFHVTCN	1.9e-11	MVGGFSTVAGAAVVAALTIIITVVNGNSEGHALYALRRSLTDPDNVLVSWDPNLVNPCTWFHVTCNQHNHVTRLDLGSSNLSGHLVPDLGKLEHLQYLEVYKNNIQGTIPTELGNLKSLISLDLYNNNISGTIPPSLGKLKSLVFLRLNDNHLVGRIPRDLVSISSLKVVDVSGNNLCGTIPTMGPFEHIPLNNFENNPRLEGPELLGLASYDTNCT	217	12642	https://onlinelibrary.wiley.com/doi/full/10.1111/pbi.13558
PlantKGA_431	Apiales	Araliaceae	Panax	notoginseng	Panax notoginseng		三七	chromosome	Yes	转录本	Pno09G001740t1	Pno09G001740t11288xxPlantKGA_431	Pno09G001740	L	partial	9	125672638	125676881	-	Pfam	PF13516	Leucine Rich repeat	Leucine-rich repeat	541	562	TLEVLNLEGCRKLTDASLVAIA	1.8	MPALINYSGDDEFYSGGSACSADSGLLFSIDSNVDIYCPPRKRSRISGPFAFGGHMFEEEKPSIELLPDECLFEIFRRLPGGQERSASACVSKRWLMLLSSVRNSEICRSKTTQTGTEVSESTNDIEMISADENQEGECDGYLTRCLEGKKVTDLRLAAIAVGTATRGGLGKLSIRGNNSTRGVTDLGLSAIAHGCPSLRVLSLWNVPSIGDEGLLKIAKECHLLEKLDLCQCPSISNKGVIAVAQNCPNLTALTIESCSKIGNESLQAIGRYCPKLQSITIKDCPLIGDQGVASLLSSASSVLSKVRFQALKITDFSLAVIGHYGKAITNLVLGGLQNVSQKGFWALGNARGLQTLGSLLITSCRGTTDVSLEAIGKGCPNLKQMSLKKCCFVSDNGL…	650	4244	https://onlinelibrary.wiley.com/doi/full/10.1111/pbi.13558
PlantKGA_431	Apiales	Araliaceae	Panax	notoginseng	Panax notoginseng		三七	chromosome	Yes	转录本	Pno09G001740t1	Pno09G001740t11288xxPlantKGA_431	Pno09G001740	L	partial	9	125672638	125676881	-	Pfam	PF13516	Leucine Rich repeat	Leucine-rich repeat	565	587	CSLLNDLDVSKCLISDDGVAALS	0.062	MPALINYSGDDEFYSGGSACSADSGLLFSIDSNVDIYCPPRKRSRISGPFAFGGHMFEEEKPSIELLPDECLFEIFRRLPGGQERSASACVSKRWLMLLSSVRNSEICRSKTTQTGTEVSESTNDIEMISADENQEGECDGYLTRCLEGKKVTDLRLAAIAVGTATRGGLGKLSIRGNNSTRGVTDLGLSAIAHGCPSLRVLSLWNVPSIGDEGLLKIAKECHLLEKLDLCQCPSISNKGVIAVAQNCPNLTALTIESCSKIGNESLQAIGRYCPKLQSITIKDCPLIGDQGVASLLSSASSVLSKVRFQALKITDFSLAVIGHYGKAITNLVLGGLQNVSQKGFWALGNARGLQTLGSLLITSCRGTTDVSLEAIGKGCPNLKQMSLKKCCFVSDNGL…	650	4244	https://onlinelibrary.wiley.com/doi/full/10.1111/pbi.13558
PlantKGA_431	Apiales	Araliaceae	Panax	notoginseng	Panax notoginseng		三七	chromosome	Yes	转录本	Pno09G001990t1	Pno09G001990t11288xxPlantKGA_431	Pno09G001990	L	partial	9	128688820	128691728	+	Pfam	PF13516	Leucine Rich repeat	Leucine-rich repeat	262	274	CSNLESLDLSGCA	1.7	MDKSQRKGNKRRMDIDDEGGGVGQGTESESRLRSYWAELTHECLINIFSRLTLEQRWRRAMFVCKSWLQAAGDPCLNTVFDLEPQFDSATESPRWWDPSFETKIDTMLRSAVNWSDGSLTEIRVRHCSDRSLRLVAERCPNIQVLSIKSCPNVTDESMTKIASGCPKLKELDISYCYEVSYKSLALLGSNCPNLRILKRNMMNWLDPSQHVGIVPNEYLNACPQDGDSEAAVIGKLMPQILHLEIRFSKLSARGLSLISEGCSNLESLDLSGCANVTSRDIANASSQLKNLKDIKKPNFYIPRSVFHTDRYGHWRLYDERFQTDVFRI	328	2909	https://onlinelibrary.wiley.com/doi/full/10.1111/pbi.13558
PlantKGA_431	Apiales	Araliaceae	Panax	notoginseng	Panax notoginseng		三七	chromosome	Yes	转录本	Pno09G001990t1	Pno09G001990t11288xxPlantKGA_431	Pno09G001990	L	partial	9	128688820	128691728	+	Pfam	PF13516	Leucine Rich repeat	Leucine-rich repeat	139	162	CPNIQVLSIKSCPNVTDESMTKIA	1.8	MDKSQRKGNKRRMDIDDEGGGVGQGTESESRLRSYWAELTHECLINIFSRLTLEQRWRRAMFVCKSWLQAAGDPCLNTVFDLEPQFDSATESPRWWDPSFETKIDTMLRSAVNWSDGSLTEIRVRHCSDRSLRLVAERCPNIQVLSIKSCPNVTDESMTKIASGCPKLKELDISYCYEVSYKSLALLGSNCPNLRILKRNMMNWLDPSQHVGIVPNEYLNACPQDGDSEAAVIGKLMPQILHLEIRFSKLSARGLSLISEGCSNLESLDLSGCANVTSRDIANASSQLKNLKDIKKPNFYIPRSVFHTDRYGHWRLYDERFQTDVFRI	328	2909	https://onlinelibrary.wiley.com/doi/full/10.1111/pbi.13558
PlantKGA_431	Apiales	Araliaceae	Panax	notoginseng	Panax notoginseng		三七	chromosome	Yes	转录本	Pno09G002149t1	Pno09G002149t11288xxPlantKGA_431	Pno09G002149	L	partial	9	130882046	130883810	-	Pfam	PF13855	Leucine rich repeat	Leucine-rich repeat	226	262	LSSLVELDVSYNKITSLPDSIGCLKKLQKLSVEGNPL	7.4e-07	MIYEQQHAGAAAASIIRMDLMKSMSKSSMGGIELQEAGRVVDVLDMSGMSLHSLPNPSLNLSLICRLDLSNNYLQSIPESLTARLLNVVVLDVHSNQLKALPNSIGCLSKLKLLNVSANLLLSLPRTIQNCRLLEELNANFNRLTRLPDTLGFELVNLKKLSVNSNKLVFLPSSTSHLTNLRILDARLNCLRSLPDHLENLIHLEILNVSQNFQYLANLPYSIGLLSSLVELDVSYNKITSLPDSIGCLKKLQKLSVEGNPLVSPPLDVVEQGLCKVKEYLSEKMNGGHKNSPKKKSWIRKLRKYSTFNGANVNINVNREEREGLIIIPSSTYNQIQTLASPRYAGMFSPLRLFSPKSYFTR	362	1765	https://onlinelibrary.wiley.com/doi/full/10.1111/pbi.13558
PlantKGA_431	Apiales	Araliaceae	Panax	notoginseng	Panax notoginseng		三七	chromosome	Yes	转录本	Pno09G002149t1	Pno09G002149t11288xxPlantKGA_431	Pno09G002149	L	partial	9	130882046	130883810	-	Pfam	PF13855	Leucine rich repeat	Leucine-rich repeat	66	121	RLDLSNNYLQSIPESLTARLLNVVVLDVHSNQLKALPNSIGCLSKLKLLNVSANLL	7e-08	MIYEQQHAGAAAASIIRMDLMKSMSKSSMGGIELQEAGRVVDVLDMSGMSLHSLPNPSLNLSLICRLDLSNNYLQSIPESLTARLLNVVVLDVHSNQLKALPNSIGCLSKLKLLNVSANLLLSLPRTIQNCRLLEELNANFNRLTRLPDTLGFELVNLKKLSVNSNKLVFLPSSTSHLTNLRILDARLNCLRSLPDHLENLIHLEILNVSQNFQYLANLPYSIGLLSSLVELDVSYNKITSLPDSIGCLKKLQKLSVEGNPLVSPPLDVVEQGLCKVKEYLSEKMNGGHKNSPKKKSWIRKLRKYSTFNGANVNINVNREEREGLIIIPSSTYNQIQTLASPRYAGMFSPLRLFSPKSYFTR	362	1765	https://onlinelibrary.wiley.com/doi/full/10.1111/pbi.13558
PlantKGA_431	Apiales	Araliaceae	Panax	notoginseng	Panax notoginseng		三七	chromosome	Yes	转录本	Pno09G002204t1	Pno09G002204t11288xxPlantKGA_431	Pno09G002204	L	partial	9	131642940	131644175	-	Pfam	PF08263	Leucine rich repeat N-terminal domain	Leucine-rich repeat-containing N-terminal, plant-type	27	64	SDDRQALLDFAVAVPHQRKLNWNASVPVCTSWVGIRCN	3e-06	MKIQFLAVLTILSFILPNLPLIISDLSDDRQALLDFAVAVPHQRKLNWNASVPVCTSWVGIRCNENGTRVIAIHLPGVGLYGAIPLQSIGKLDALKVLSLRSNNLNGNLPSDIPSIPSLQALYLQQNNFSGDIPLSLSPQLTVVDLSFNSFTGNIPPTLGKLKRLTMLDLQFNSFSGSIPNLNIPRLKLLNLSYNMLNGSIPDFLQKFPTSSFMGNSLLCVPPLGNCSSTSPSPSPSPSPDYLQSSPALPKTQSGGHFKKLRAGTIIAIAIGAFSIIFLALMILLCCLKKKDSDGSGASKAKVSNGGKNEKSEEYFGSGIQASEKNKLFFFEGSSNSFDLEDLLRASAEVLGKGSYGTAYKAVLDEGTTVVVKRLREVGVGKKEFEQHMEVVGRIGQHP…	411	1236	https://onlinelibrary.wiley.com/doi/full/10.1111/pbi.13558
PlantKGA_431	Apiales	Araliaceae	Panax	notoginseng	Panax notoginseng		三七	chromosome	Yes	转录本	Pno09G005574t2	Pno09G005574t21288xxPlantKGA_431	Pno09G005574	L	partial	9	31124245	31127886	+	Pfam	PF13855	Leucine rich repeat	Leucine-rich repeat	442	497	SLRSVNLSANYIVHIAPGSLPKGLHTLNLSRNKISTIEGLRELTRLRVLDLSYNRI	3.2e-11	MFKFNCLSALSCKKKREEKDKKSVSTVNDNKELVETLQVKIERLTKTDEKKLGSFSILVPFGITRSSSNKVKVMSHDSPVGGEVEDVAYEGEDEHDENVSIKRDFSDCDLQARVVKSGEENDQSIKKGMNIYNSFNTELSDQFDNKTEKDDEDHVDMVQSGHVSDPGTRKTEFWASPKLKRSCSNLETRDVLKKIVDRLPLSKSQSFEEMQTLAKRMSEDLPGNLSSPVSVMTQRSADKVMLKKHSSSQILPSRSRRLWWKLFLWSHRNLHEQWTGKQLPVQPPLNQQGGYSSDTLEPNRGTRFGLPNSYTFRRGKKNIDNQSWDEFRGVSGLWPQNQWVAFSTESSSLTRVDEWVKELSNIPPFVVVNDDPAEDGISFPPSPPDTGKSPALSQSNRHQ…	675	3642	https://onlinelibrary.wiley.com/doi/full/10.1111/pbi.13558
PlantKGA_431	Apiales	Araliaceae	Panax	notoginseng	Panax notoginseng		三七	chromosome	Yes	转录本	Pno09G005574t2	Pno09G005574t21288xxPlantKGA_431	Pno09G005574	L	partial	9	31124245	31127886	+	Pfam	PF13516	Leucine Rich repeat	Leucine-rich repeat	531	543	KLTILDLSFNKIT	0.39	MFKFNCLSALSCKKKREEKDKKSVSTVNDNKELVETLQVKIERLTKTDEKKLGSFSILVPFGITRSSSNKVKVMSHDSPVGGEVEDVAYEGEDEHDENVSIKRDFSDCDLQARVVKSGEENDQSIKKGMNIYNSFNTELSDQFDNKTEKDDEDHVDMVQSGHVSDPGTRKTEFWASPKLKRSCSNLETRDVLKKIVDRLPLSKSQSFEEMQTLAKRMSEDLPGNLSSPVSVMTQRSADKVMLKKHSSSQILPSRSRRLWWKLFLWSHRNLHEQWTGKQLPVQPPLNQQGGYSSDTLEPNRGTRFGLPNSYTFRRGKKNIDNQSWDEFRGVSGLWPQNQWVAFSTESSSLTRVDEWVKELSNIPPFVVVNDDPAEDGISFPPSPPDTGKSPALSQSNRHQ…	675	3642	https://onlinelibrary.wiley.com/doi/full/10.1111/pbi.13558
PlantKGA_431	Apiales	Araliaceae	Panax	notoginseng	Panax notoginseng		三七	chromosome	Yes	转录本	Pno09G005859t1	Pno09G005859t11288xxPlantKGA_431	Pno09G005859	L	partial	9	32946972	32949749	-	Pfam	PF13855	Leucine rich repeat	Leucine-rich repeat	232	290	PNISRLDLSYNNFSGHLPIAFSQILSLKYLFLASNQFTGNIPVEYENFPQLQALDLSFN	1.3e-07	MDPDEVEMMKMMGIPVWFDSTKGKPVAGNDVSGVRAVMKRMPKHYMNRRVHYQDDYRAYSAFLHKPMMSFENAGLLALTRVGSRRVVQISAGFMIFFSILGKFGAVFASIPTPIFAALYCLFFAYVGAAGLSFLQFCNLNSFQTKFILGFSVFMGFFVTQYFIEYTAIKGFGPVHTRSLISLKNLVFLDLSRNNFGGDIQEILGRITQVKFLLLHGNSYTGGLYTLGILGLPNISRLDLSYNNFSGHLPIAFSQILSLKYLFLASNQFTGNIPVEYENFPQLQALDLSFNWLNGSIPPSLGKLSSLLWLMLANNYLCRVSLYFMDASLH	329	2778	https://onlinelibrary.wiley.com/doi/full/10.1111/pbi.13558
PlantKGA_431	Apiales	Araliaceae	Panax	notoginseng	Panax notoginseng		三七	chromosome	Yes	转录本	Pno09G009943t1	Pno09G009943t11288xxPlantKGA_431	Pno09G009943	L	partial	9	5584028	5586810	-	Pfam	PF08263	Leucine rich repeat N-terminal domain	Leucine-rich repeat-containing N-terminal, plant-type	111	147	GDALNALKNNLADPNTVLQSWDPTLVNPCTWFHVTCN	2.5e-10	MASPSKVSTQLEPWCDLEDKVVLITEVSSGLGWDFCITLAKTGCKVIAAARRADRLKSLCDQINQSSTTPRAVTLALDVTADAPAIEAAVEKAWAAFGHIDCLINNAGIRGDALNALKNNLADPNTVLQSWDPTLVNPCTWFHVTCNSENSVTRVGRDKIETPEQFMQAQETTLRLDLDGLVVIGGDDSNTNACLLAENFRSKNLKTRVIGCPKTIDGDLKCKEVPTSFGFDTACKVTLDLDP	243	2783	https://onlinelibrary.wiley.com/doi/full/10.1111/pbi.13558
PlantKGA_431	Apiales	Araliaceae	Panax	notoginseng	Panax notoginseng		三七	chromosome	Yes	转录本	Pno09G015464t1	Pno09G015464t11288xxPlantKGA_431	Pno09G015464	L	partial	9	8827405	8830989	+	Pfam	PF13516	Leucine Rich repeat	Leucine-rich repeat	270	289	LISLDLGFNEIRDEGAFSIS	0.0035	MEFGAARKRGRPEASLNDNGGFKKSKQAYISVCLMQVFDKLKLLIRRLCSLRTVGSKYKQYVWTNELNIYGYDTASAFALMEQDIASTSASEDVSGDSDLHMAALALELCSTLMADRRSTPNVGVTALQSFFAALIYSANTSFDALLVSLLSTAKPSSRLSGVAKQALFSIAQCVAVLCLAVGDPKCSSTVKMLTAILKDDSTTNSAKQLLALLCLGEIGRRKDLSPYAHIENIVIQSFQSPFEEIKSAASYALGNIAVARNLKVVNEALISLDLGFNEIRDEGAFSISQALKANEDVRLTSLNLASNFLTKLGQMQETMPMR	323	3585	https://onlinelibrary.wiley.com/doi/full/10.1111/pbi.13558
PlantKGA_431	Apiales	Araliaceae	Panax	notoginseng	Panax notoginseng		三七	chromosome	Yes	转录本	Pno09G016989t1	Pno09G016989t11288xxPlantKGA_431	Pno09G016989	L	partial	9	98262287	98267319	+	Pfam	PF13855	Leucine rich repeat	Leucine-rich repeat	428	483	SLKALNLSGNAIVRITAGALPRGLHILNISKNNITTIEGLRELTRLRVLDLSYNRI	4.7e-09	MVRFSCFNAHIHSSKPKKTVQLSAESMHKALEDRSNNQVLKDFTNSSSGNPLHLKAQKDTTCITSDQVTASSSIENDCKSEEIKTNYNVESDAEFHKTHMKKSQSLGSGLDQMGRVFGGKDSRDETDQGFSGDGSHGQSGSVISVGEKEPEVSLSDQCPRALRSVSVQVSSDMVNNESIFSIGDAQQSEKGDCRENSDTQFSGECSNHTPRTPCTQHVIAKSCSLPNIVSYGGRSTTESIMPRATSCEDLNILDLNRKEILVPKVGTQVNQDDEGYDSVKSNEKTNMDNPADDGYEGYNYVGTAKDWIIPVMDEVNTLKIPRPESAICRWEYLPSKDFKLKRIEEWVMDLQHCSPLDEKYELSTSTDHPADARVTVLDSLPAARHDGKITPGMEAAKRY…	695	5033	https://onlinelibrary.wiley.com/doi/full/10.1111/pbi.13558
PlantKGA_431	Apiales	Araliaceae	Panax	notoginseng	Panax notoginseng		三七	chromosome	Yes	转录本	Pno10G000094t1	Pno10G000094t11288xxPlantKGA_431	Pno10G000094	L	partial	10	10244346	10252565	-	Pfam	PF13855	Leucine rich repeat	Leucine-rich repeat	204	261	LLEKLYLDNNKLYILPPELGELKNLKVLAVDYNMLVTVPVELRQCAGLVELSLEHNKL	1.1e-07	MSWGLGWKRATETFHLSLYYGTDDTLEDYSPSSSSRSSSSSSISSNQDQQQLLQQHQELGFRIDLDWNAGDDEDQVALRLQSQVMVALPLPQDAVELEFNVTGDDVEGGECNVGVDMKVVKRREPLRAVTLSRVGGSSHQSDGMGVLTRLMRSDFSSNSSGSPTGSGDVDMLVGCPDHWKSVTLVSLCGCGLSVLPVELTRLPLLEKLYLDNNKLYILPPELGELKNLKVLAVDYNMLVTVPVELRQCAGLVELSLEHNKLVRPLLDFRVMAELRVLRLFGNPLEFLPEILPLHKLHHLSLANIRIVADDNLRLVNVQIETENSSYFVASRHKLSAFFSLIFRFSSCHHPLLASALAKIMQDEGNRVVVGKDENAVRQLISMISSDNQHVVEQACSALS…	1342	8220	https://onlinelibrary.wiley.com/doi/full/10.1111/pbi.13558
PlantKGA_431	Apiales	Araliaceae	Panax	notoginseng	Panax notoginseng		三七	chromosome	Yes	转录本	Pno10G000561t1	Pno10G000561t11288xxPlantKGA_431	Pno10G000561	L	partial	10	11425446	11430604	-	Pfam	PF13516	Leucine Rich repeat	Leucine-rich repeat	172	191	HCKNLTELDIQENGMDDVGG	0.031	MDPIPKRNKDSAGSVNSANSPNSTAPFPDEVLERVLSLVRSHKDRSSISLVCKDWFNAERWSRTRVFIGNCYSVSPEIVARRFPNIRSVTLKGKPRFSDFNLVPQNWGADIHSWLAVFAKAYPFLEELRLKRMAVRDESLEFLANSFSNFKALSLLSCDGFSTDGLKAIATHCKNLTELDIQENGMDDVGGGWLNCFAENFVSLEVLNFASLNSEVSFDALERLVNRCRSLRVLKVNKNISLEQLQKLLIRAPQLTKLGTGSFQQELAPRQCEELESAFSRCKNLRTLSGLWEATSLYLPVFFPACANLTFLNLSYATLQSGELEKVLAQCSNLRRLWVLDTVGDNGLEAVGSNCPLLEELRVFPSDPFDQDIFHGVTESGFVAVSYGCRKLHYVLYFC…	589	5159	https://onlinelibrary.wiley.com/doi/full/10.1111/pbi.13558
PlantKGA_431	Apiales	Araliaceae	Panax	notoginseng	Panax notoginseng		三七	chromosome	Yes	转录本	Pno10G001268t1	Pno10G001268t11288xxPlantKGA_431	Pno10G001268	L	partial	10	14217714	14220273	-	Pfam	PF08263	Leucine rich repeat N-terminal domain	Leucine-rich repeat-containing N-terminal, plant-type	34	73	TDQSALFALKSSIIVDPYNLLMNNWSISTSACNWIGVTCS	5.3e-08	MAMERACFIFSMLVLLLKISTFSSSSAVTTNNTTDQSALFALKSSIIVDPYNLLMNNWSISTSACNWIGVTCSSLHHERIIALNLSDMGLIGTIPPQMGNLSFLVSLDLKNNSFNSTLPKELAHLRRLKQVNLRNNKFSGEIPSLFSVLPNLEGLFLSYNGFTGTIPSSFSNISKLEQLKLGGNSLQGNIPMEFGSLVNLKLLDLTQNKLTGSIPVTIFNISTLRTIVLSNNNLSGNLPMDICQGEVPQEFGSLGSLEYLLIDFNSLGGAIPATIFNISSLQVISIMLNNLSGEFPSNIGYNLPNLRAMLLSNNFLSGILPNSLSNASQLSDLDLCNNSFTGTIPMSLGKLGLLQRLKLEINSFISESSSQEFSFLTALTNCRNLYYLSISYNPLSGFL…	718	2560	https://onlinelibrary.wiley.com/doi/full/10.1111/pbi.13558
PlantKGA_431	Apiales	Araliaceae	Panax	notoginseng	Panax notoginseng		三七	chromosome	Yes	转录本	Pno10G001268t1	Pno10G001268t11288xxPlantKGA_431	Pno10G001268	L	partial	10	14217714	14220273	-	Pfam	PF00560	Leucine Rich Repeat	Leucine-rich repeat	305	326	NLRAMLLSNNFLSGILPNSLSN	1.2	MAMERACFIFSMLVLLLKISTFSSSSAVTTNNTTDQSALFALKSSIIVDPYNLLMNNWSISTSACNWIGVTCSSLHHERIIALNLSDMGLIGTIPPQMGNLSFLVSLDLKNNSFNSTLPKELAHLRRLKQVNLRNNKFSGEIPSLFSVLPNLEGLFLSYNGFTGTIPSSFSNISKLEQLKLGGNSLQGNIPMEFGSLVNLKLLDLTQNKLTGSIPVTIFNISTLRTIVLSNNNLSGNLPMDICQGEVPQEFGSLGSLEYLLIDFNSLGGAIPATIFNISSLQVISIMLNNLSGEFPSNIGYNLPNLRAMLLSNNFLSGILPNSLSNASQLSDLDLCNNSFTGTIPMSLGKLGLLQRLKLEINSFISESSSQEFSFLTALTNCRNLYYLSISYNPLSGFL…	718	2560	https://onlinelibrary.wiley.com/doi/full/10.1111/pbi.13558
PlantKGA_431	Apiales	Araliaceae	Panax	notoginseng	Panax notoginseng		三七	chromosome	Yes	转录本	Pno10G001268t1	Pno10G001268t11288xxPlantKGA_431	Pno10G001268	L	partial	10	14217714	14220273	-	Pfam	PF00560	Leucine Rich Repeat	Leucine-rich repeat	384	406	NLYYLSISYNPLSGFLPTSIGNF	1.6	MAMERACFIFSMLVLLLKISTFSSSSAVTTNNTTDQSALFALKSSIIVDPYNLLMNNWSISTSACNWIGVTCSSLHHERIIALNLSDMGLIGTIPPQMGNLSFLVSLDLKNNSFNSTLPKELAHLRRLKQVNLRNNKFSGEIPSLFSVLPNLEGLFLSYNGFTGTIPSSFSNISKLEQLKLGGNSLQGNIPMEFGSLVNLKLLDLTQNKLTGSIPVTIFNISTLRTIVLSNNNLSGNLPMDICQGEVPQEFGSLGSLEYLLIDFNSLGGAIPATIFNISSLQVISIMLNNLSGEFPSNIGYNLPNLRAMLLSNNFLSGILPNSLSNASQLSDLDLCNNSFTGTIPMSLGKLGLLQRLKLEINSFISESSSQEFSFLTALTNCRNLYYLSISYNPLSGFL…	718	2560	https://onlinelibrary.wiley.com/doi/full/10.1111/pbi.13558
PlantKGA_431	Apiales	Araliaceae	Panax	notoginseng	Panax notoginseng		三七	chromosome	Yes	转录本	Pno10G001268t1	Pno10G001268t11288xxPlantKGA_431	Pno10G001268	L	partial	10	14217714	14220273	-	Pfam	PF13855	Leucine rich repeat	Leucine-rich repeat	128	186	LKQVNLRNNKFSGEIPSLFSVLPNLEGLFLSYNGFTGTIPSSFSNISKLEQLKLGGNSL	9.6e-08	MAMERACFIFSMLVLLLKISTFSSSSAVTTNNTTDQSALFALKSSIIVDPYNLLMNNWSISTSACNWIGVTCSSLHHERIIALNLSDMGLIGTIPPQMGNLSFLVSLDLKNNSFNSTLPKELAHLRRLKQVNLRNNKFSGEIPSLFSVLPNLEGLFLSYNGFTGTIPSSFSNISKLEQLKLGGNSLQGNIPMEFGSLVNLKLLDLTQNKLTGSIPVTIFNISTLRTIVLSNNNLSGNLPMDICQGEVPQEFGSLGSLEYLLIDFNSLGGAIPATIFNISSLQVISIMLNNLSGEFPSNIGYNLPNLRAMLLSNNFLSGILPNSLSNASQLSDLDLCNNSFTGTIPMSLGKLGLLQRLKLEINSFISESSSQEFSFLTALTNCRNLYYLSISYNPLSGFL…	718	2560	https://onlinelibrary.wiley.com/doi/full/10.1111/pbi.13558
PlantKGA_431	Apiales	Araliaceae	Panax	notoginseng	Panax notoginseng		三七	chromosome	Yes	转录本	Pno10G001268t1	Pno10G001268t11288xxPlantKGA_431	Pno10G001268	L	partial	10	14217714	14220273	-	Pfam	PF13855	Leucine rich repeat	Leucine-rich repeat	522	578	KINLSYNHFSGDIPTTFEKLVSLEYLDLSNDNLSGVIPKSLEGCLSLRYFNASFNRF	3.1e-09	MAMERACFIFSMLVLLLKISTFSSSSAVTTNNTTDQSALFALKSSIIVDPYNLLMNNWSISTSACNWIGVTCSSLHHERIIALNLSDMGLIGTIPPQMGNLSFLVSLDLKNNSFNSTLPKELAHLRRLKQVNLRNNKFSGEIPSLFSVLPNLEGLFLSYNGFTGTIPSSFSNISKLEQLKLGGNSLQGNIPMEFGSLVNLKLLDLTQNKLTGSIPVTIFNISTLRTIVLSNNNLSGNLPMDICQGEVPQEFGSLGSLEYLLIDFNSLGGAIPATIFNISSLQVISIMLNNLSGEFPSNIGYNLPNLRAMLLSNNFLSGILPNSLSNASQLSDLDLCNNSFTGTIPMSLGKLGLLQRLKLEINSFISESSSQEFSFLTALTNCRNLYYLSISYNPLSGFL…	718	2560	https://onlinelibrary.wiley.com/doi/full/10.1111/pbi.13558
PlantKGA_431	Apiales	Araliaceae	Panax	notoginseng	Panax notoginseng		三七	chromosome	Yes	转录本	Pno10G001276t1	Pno10G001276t11288xxPlantKGA_431	Pno10G001276	L	partial	10	14274174	14275258	+	Pfam	PF00560	Leucine Rich Repeat	Leucine-rich repeat	148	163	LKYLNLSFNQLQGEIP	1.8	MRTVGNLYLGTNDLVGSIPNCIGNLSSLKELFLESNRLTSEVPSSFWTLKDLIFLNLSSNSLSGYLPSQVGNLKVIIRMDLSNNQFSGNISSMMGSLQDLSYLSLSHNRLKGPVPDSFGNLKSLEFLDLSYNNIYGEIPKSLESLVYLKYLNLSFNQLQGEIPSGRPFANFSAESLIDNFALCGASHLQVPLFICLPIVASMLLLVIIAYLLITRRRRRQKASNEIEKSIIPSLKRLSCQKLFYATDGFEDSNLLGIGGYGNGSVYKGILSDGLIVAVKVIKKDEHFGAKKDCLLSN	297	1085	https://onlinelibrary.wiley.com/doi/full/10.1111/pbi.13558
PlantKGA_431	Apiales	Araliaceae	Panax	notoginseng	Panax notoginseng		三七	chromosome	Yes	转录本	Pno10G001276t1	Pno10G001276t11288xxPlantKGA_431	Pno10G001276	L	partial	10	14274174	14275258	+	Pfam	PF13855	Leucine rich repeat	Leucine-rich repeat	6	62	NLYLGTNDLVGSIPNCIGNLSSLKELFLESNRLTSEVPSSFWTLKDLIFLNLSSNSL	5.5e-07	MRTVGNLYLGTNDLVGSIPNCIGNLSSLKELFLESNRLTSEVPSSFWTLKDLIFLNLSSNSLSGYLPSQVGNLKVIIRMDLSNNQFSGNISSMMGSLQDLSYLSLSHNRLKGPVPDSFGNLKSLEFLDLSYNNIYGEIPKSLESLVYLKYLNLSFNQLQGEIPSGRPFANFSAESLIDNFALCGASHLQVPLFICLPIVASMLLLVIIAYLLITRRRRRQKASNEIEKSIIPSLKRLSCQKLFYATDGFEDSNLLGIGGYGNGSVYKGILSDGLIVAVKVIKKDEHFGAKKDCLLSN	297	1085	https://onlinelibrary.wiley.com/doi/full/10.1111/pbi.13558
PlantKGA_431	Apiales	Araliaceae	Panax	notoginseng	Panax notoginseng		三七	chromosome	Yes	转录本	Pno10G001276t1	Pno10G001276t11288xxPlantKGA_431	Pno10G001276	L	partial	10	14274174	14275258	+	Pfam	PF13855	Leucine rich repeat	Leucine-rich repeat	79	134	MDLSNNQFSGNISSMMGSLQDLSYLSLSHNRLKGPVPDSFGNLKSLEFLDLSYNNI	2.5e-09	MRTVGNLYLGTNDLVGSIPNCIGNLSSLKELFLESNRLTSEVPSSFWTLKDLIFLNLSSNSLSGYLPSQVGNLKVIIRMDLSNNQFSGNISSMMGSLQDLSYLSLSHNRLKGPVPDSFGNLKSLEFLDLSYNNIYGEIPKSLESLVYLKYLNLSFNQLQGEIPSGRPFANFSAESLIDNFALCGASHLQVPLFICLPIVASMLLLVIIAYLLITRRRRRQKASNEIEKSIIPSLKRLSCQKLFYATDGFEDSNLLGIGGYGNGSVYKGILSDGLIVAVKVIKKDEHFGAKKDCLLSN	297	1085	https://onlinelibrary.wiley.com/doi/full/10.1111/pbi.13558
PlantKGA_431	Apiales	Araliaceae	Panax	notoginseng	Panax notoginseng		三七	chromosome	Yes	转录本	Pno10G001534t1	Pno10G001534t11288xxPlantKGA_431	Pno10G001534	L	partial	10	16433815	16435219	-	Pfam	PF13855	Leucine rich repeat	Leucine-rich repeat	179	237	LEKIDLGSNKLQGRVPPDLGQLNGLILLDLSHNSLAGPIPETLSGLQQLEYLIIDDNPI	6.2e-08	MASLRLSLLFLGFLAFAGADMVMEEEEVLGLFEVMGSLLEDSSWAEMHPLPCTDTPWPGVQCEVADSPVSLSPSLFGTFSSLEHIALESNPSLFGEIPPSLAKIPNLRVLCLPQNNLHGKIPKEIGGLVNLEQLDLSYNNFSGSVPQEIGGLRSLTILDLSWNGLQGVVPSNLGQLQLLEKIDLGSNKLQGRVPPDLGQLNGLILLDLSHNSLAGPIPETLSGLQQLEYLIIDDNPINSGVPLFIGALKKLKVLSFSGCGLTGPILLSLSHLNSLTALSLDNNSLSGTIPSDLGTLPNLDQLNLSQNLLSGEISLPEEFINRLGERLDLEGNIGICTRHKLSSSSSKNKNINIPSFLQTPCLDTRIPTLDHPDDIKPIWVEGSSNISSSSCRLVQKYLF…	418	1405	https://onlinelibrary.wiley.com/doi/full/10.1111/pbi.13558
PlantKGA_431	Apiales	Araliaceae	Panax	notoginseng	Panax notoginseng		三七	chromosome	Yes	转录本	Pno10G001534t1	Pno10G001534t11288xxPlantKGA_431	Pno10G001534	L	partial	10	16433815	16435219	-	Pfam	PF13855	Leucine rich repeat	Leucine-rich repeat	105	165	PNLRVLCLPQNNLHGKIPKEIGGLVNLEQLDLSYNNFSGSVPQEIGGLRSLTILDLSWNGL	1.2e-09	MASLRLSLLFLGFLAFAGADMVMEEEEVLGLFEVMGSLLEDSSWAEMHPLPCTDTPWPGVQCEVADSPVSLSPSLFGTFSSLEHIALESNPSLFGEIPPSLAKIPNLRVLCLPQNNLHGKIPKEIGGLVNLEQLDLSYNNFSGSVPQEIGGLRSLTILDLSWNGLQGVVPSNLGQLQLLEKIDLGSNKLQGRVPPDLGQLNGLILLDLSHNSLAGPIPETLSGLQQLEYLIIDDNPINSGVPLFIGALKKLKVLSFSGCGLTGPILLSLSHLNSLTALSLDNNSLSGTIPSDLGTLPNLDQLNLSQNLLSGEISLPEEFINRLGERLDLEGNIGICTRHKLSSSSSKNKNINIPSFLQTPCLDTRIPTLDHPDDIKPIWVEGSSNISSSSCRLVQKYLF…	418	1405	https://onlinelibrary.wiley.com/doi/full/10.1111/pbi.13558
PlantKGA_431	Apiales	Araliaceae	Panax	notoginseng	Panax notoginseng		三七	chromosome	Yes	转录本	Pno10G001628t1	Pno10G001628t11288xxPlantKGA_431	Pno10G001628	L	partial	10	17422620	17425715	-	Pfam	PF08263	Leucine rich repeat N-terminal domain	Leucine-rich repeat-containing N-terminal, plant-type	28	65	DAERRALLDFKSLLMEPSNQLNSWQGQHCCSWKGIKCS	1.3e-09	MNQKHIFSPLLFFLVFNILLSFATGCVDAERRALLDFKSLLMEPSNQLNSWQGQHCCSWKGIKCSSLGFVIALSLRNPNPESVLLNLNSELVSTSSNSTKSTAIRGKISPSLFTLDNLRYLDLSFNNFMSSKLPSGLANLTRLTYLNLSNAMFEDSITTQLANLTKLTKLDISCSSMISDLSTISINLTSSSRVNSGSMSSYINNGKLSSSNINWLQRLTNLKELRLSGIDLFEASQSTRWAEPISFLSNLSKLHLSNCRISGRIPVDHLLNLTNLYSLIMDSNDLSSHIPKQLANLTSLSVLDFRSSYLQGPIPYLPQLKGLEVGNNYGMTIDLSSMFSVPWPNLVRLDVQYTQVTGSIPDSLANSTMLVYFSADNCSVQGAIPSSFMNLSRLEVLEL…	1031	3096	https://onlinelibrary.wiley.com/doi/full/10.1111/pbi.13558
PlantKGA_431	Apiales	Araliaceae	Panax	notoginseng	Panax notoginseng		三七	chromosome	Yes	转录本	Pno10G001628t1	Pno10G001628t11288xxPlantKGA_431	Pno10G001628	L	partial	10	17422620	17425715	-	Pfam	PF00560	Leucine Rich Repeat	Leucine-rich repeat	660	680	MTLDLSNNSLSGRIPLSLGNC	1.3	MNQKHIFSPLLFFLVFNILLSFATGCVDAERRALLDFKSLLMEPSNQLNSWQGQHCCSWKGIKCSSLGFVIALSLRNPNPESVLLNLNSELVSTSSNSTKSTAIRGKISPSLFTLDNLRYLDLSFNNFMSSKLPSGLANLTRLTYLNLSNAMFEDSITTQLANLTKLTKLDISCSSMISDLSTISINLTSSSRVNSGSMSSYINNGKLSSSNINWLQRLTNLKELRLSGIDLFEASQSTRWAEPISFLSNLSKLHLSNCRISGRIPVDHLLNLTNLYSLIMDSNDLSSHIPKQLANLTSLSVLDFRSSYLQGPIPYLPQLKGLEVGNNYGMTIDLSSMFSVPWPNLVRLDVQYTQVTGSIPDSLANSTMLVYFSADNCSVQGAIPSSFMNLSRLEVLEL…	1031	3096	https://onlinelibrary.wiley.com/doi/full/10.1111/pbi.13558
PlantKGA_431	Apiales	Araliaceae	Panax	notoginseng	Panax notoginseng		三七	chromosome	Yes	转录本	Pno10G001628t1	Pno10G001628t11288xxPlantKGA_431	Pno10G001628	L	partial	10	17422620	17425715	-	Pfam	PF00560	Leucine Rich Repeat	Leucine-rich repeat	393	415	RLEVLELNGNYITGHLSPSISNL	1.6	MNQKHIFSPLLFFLVFNILLSFATGCVDAERRALLDFKSLLMEPSNQLNSWQGQHCCSWKGIKCSSLGFVIALSLRNPNPESVLLNLNSELVSTSSNSTKSTAIRGKISPSLFTLDNLRYLDLSFNNFMSSKLPSGLANLTRLTYLNLSNAMFEDSITTQLANLTKLTKLDISCSSMISDLSTISINLTSSSRVNSGSMSSYINNGKLSSSNINWLQRLTNLKELRLSGIDLFEASQSTRWAEPISFLSNLSKLHLSNCRISGRIPVDHLLNLTNLYSLIMDSNDLSSHIPKQLANLTSLSVLDFRSSYLQGPIPYLPQLKGLEVGNNYGMTIDLSSMFSVPWPNLVRLDVQYTQVTGSIPDSLANSTMLVYFSADNCSVQGAIPSSFMNLSRLEVLEL…	1031	3096	https://onlinelibrary.wiley.com/doi/full/10.1111/pbi.13558
PlantKGA_431	Apiales	Araliaceae	Panax	notoginseng	Panax notoginseng		三七	chromosome	Yes	转录本	Pno10G001628t1	Pno10G001628t11288xxPlantKGA_431	Pno10G001628	L	partial	10	17422620	17425715	-	Pfam	PF13855	Leucine rich repeat	Leucine-rich repeat	866	925	GLYMLNLSHNRLSGEIPKSVGDMKGLESLDLSFNTLSGEIPLTMASMDFLTVLNLSYNNL	8.4e-07	MNQKHIFSPLLFFLVFNILLSFATGCVDAERRALLDFKSLLMEPSNQLNSWQGQHCCSWKGIKCSSLGFVIALSLRNPNPESVLLNLNSELVSTSSNSTKSTAIRGKISPSLFTLDNLRYLDLSFNNFMSSKLPSGLANLTRLTYLNLSNAMFEDSITTQLANLTKLTKLDISCSSMISDLSTISINLTSSSRVNSGSMSSYINNGKLSSSNINWLQRLTNLKELRLSGIDLFEASQSTRWAEPISFLSNLSKLHLSNCRISGRIPVDHLLNLTNLYSLIMDSNDLSSHIPKQLANLTSLSVLDFRSSYLQGPIPYLPQLKGLEVGNNYGMTIDLSSMFSVPWPNLVRLDVQYTQVTGSIPDSLANSTMLVYFSADNCSVQGAIPSSFMNLSRLEVLEL…	1031	3096	https://onlinelibrary.wiley.com/doi/full/10.1111/pbi.13558
PlantKGA_431	Apiales	Araliaceae	Panax	notoginseng	Panax notoginseng		三七	chromosome	Yes	转录本	Pno10G002245t1	Pno10G002245t11288xxPlantKGA_431	Pno10G002245	L	partial	10	22165004	22168873	+	Pfam	PF13855	Leucine rich repeat	Leucine-rich repeat	127	184	NLKELRLTRNYFWGSIPETIGNLLSLQELDLSFNKMNGTIPATLGQLSKLTNLNLEGN	9.4e-10	MSHHFLLIATVFGPPNMDIIRLDLAKESRIITRIDTERESLLTFTKGLTDPSGRLSSRVGVDYCQWSGIGCNNISGNVINLDLQNPFPPNTYDSFTTICPNNSLVSLDLSGNRLIGDLPNPIESFKNLKELRLTRNYFWGSIPETIGNLLSLQELDLSFNKMNGTIPATLGQLSKLTNLNLEGNSWQGVLSEAQPINLTRLQHLTNNLFSGPIPRDVSELMPQLRILDLSKNSLNGSIPDEIGNLRWLEHLIYRTTHSTNSESLEPIAYQFGWRIPSGKQLQTSDDLFIYEGNPSLCGGAYSIQVPEDADIPTS	314	3870	https://onlinelibrary.wiley.com/doi/full/10.1111/pbi.13558
PlantKGA_431	Apiales	Araliaceae	Panax	notoginseng	Panax notoginseng		三七	chromosome	Yes	转录本	Pno10G002245t1	Pno10G002245t11288xxPlantKGA_431	Pno10G002245	L	partial	10	22165004	22168873	+	Pfam	PF00560	Leucine Rich Repeat	Leucine-rich repeat	103	125	SLVSLDLSGNRLIGDLPNPIESF	0.25	MSHHFLLIATVFGPPNMDIIRLDLAKESRIITRIDTERESLLTFTKGLTDPSGRLSSRVGVDYCQWSGIGCNNISGNVINLDLQNPFPPNTYDSFTTICPNNSLVSLDLSGNRLIGDLPNPIESFKNLKELRLTRNYFWGSIPETIGNLLSLQELDLSFNKMNGTIPATLGQLSKLTNLNLEGNSWQGVLSEAQPINLTRLQHLTNNLFSGPIPRDVSELMPQLRILDLSKNSLNGSIPDEIGNLRWLEHLIYRTTHSTNSESLEPIAYQFGWRIPSGKQLQTSDDLFIYEGNPSLCGGAYSIQVPEDADIPTS	314	3870	https://onlinelibrary.wiley.com/doi/full/10.1111/pbi.13558
PlantKGA_431	Apiales	Araliaceae	Panax	notoginseng	Panax notoginseng		三七	chromosome	Yes	转录本	Pno10G002245t1	Pno10G002245t11288xxPlantKGA_431	Pno10G002245	L	partial	10	22165004	22168873	+	Pfam	PF00560	Leucine Rich Repeat	Leucine-rich repeat	223	245	QLRILDLSKNSLNGSIPDEIGNL	0.58	MSHHFLLIATVFGPPNMDIIRLDLAKESRIITRIDTERESLLTFTKGLTDPSGRLSSRVGVDYCQWSGIGCNNISGNVINLDLQNPFPPNTYDSFTTICPNNSLVSLDLSGNRLIGDLPNPIESFKNLKELRLTRNYFWGSIPETIGNLLSLQELDLSFNKMNGTIPATLGQLSKLTNLNLEGNSWQGVLSEAQPINLTRLQHLTNNLFSGPIPRDVSELMPQLRILDLSKNSLNGSIPDEIGNLRWLEHLIYRTTHSTNSESLEPIAYQFGWRIPSGKQLQTSDDLFIYEGNPSLCGGAYSIQVPEDADIPTS	314	3870	https://onlinelibrary.wiley.com/doi/full/10.1111/pbi.13558
PlantKGA_431	Apiales	Araliaceae	Panax	notoginseng	Panax notoginseng		三七	chromosome	Yes	转录本	Pno10G002245t1	Pno10G002245t11288xxPlantKGA_431	Pno10G002245	L	partial	10	22165004	22168873	+	Pfam	PF08263	Leucine rich repeat N-terminal domain	Leucine-rich repeat-containing N-terminal, plant-type	35	72	DTERESLLTFTKGLTDPSGRLSSRVGVDYCQWSGIGCN	8.8e-07	MSHHFLLIATVFGPPNMDIIRLDLAKESRIITRIDTERESLLTFTKGLTDPSGRLSSRVGVDYCQWSGIGCNNISGNVINLDLQNPFPPNTYDSFTTICPNNSLVSLDLSGNRLIGDLPNPIESFKNLKELRLTRNYFWGSIPETIGNLLSLQELDLSFNKMNGTIPATLGQLSKLTNLNLEGNSWQGVLSEAQPINLTRLQHLTNNLFSGPIPRDVSELMPQLRILDLSKNSLNGSIPDEIGNLRWLEHLIYRTTHSTNSESLEPIAYQFGWRIPSGKQLQTSDDLFIYEGNPSLCGGAYSIQVPEDADIPTS	314	3870	https://onlinelibrary.wiley.com/doi/full/10.1111/pbi.13558
PlantKGA_431	Apiales	Araliaceae	Panax	notoginseng	Panax notoginseng		三七	chromosome	Yes	转录本	Pno10G002265t1	Pno10G002265t11288xxPlantKGA_431	Pno10G002265	L	partial	10	22313099	22316119	+	Pfam	PF08263	Leucine rich repeat N-terminal domain	Leucine-rich repeat-containing N-terminal, plant-type	37	72	AILLEVRQSFVDDPQNVLQDWSKKNSNFCTWTGVSC	5.2e-09	MTILPKQIHPNLLVFVFLGFFLCGHVLCKNSSESTLAILLEVRQSFVDDPQNVLQDWSKKNSNFCTWTGVSCGRDLADGSLHVLSLNLSDSSLGGSLSPALGRLNDLLHLDLSSNYLSGPIPPNLSNLSSLTSLFLFSNQLSGPIPTQLGSLYNLQFLRIGDNGLAGEIPATFGDLENLVVLALASCSLTGPIPPEIGKLRGLENLVLQENQLTGQIPAELGNCSSLVVFTAAVNNLTGSIPAQLGNLKNLEKLNLANNTLSAEIPSELGGLSQLVYLNFLGNQLEGSIPKSLEKLGNLQNLDLSANRLTGEIPDELGNMGQLVYLVLSSNNLSGLIPKSICSNATSLEHLILGGNQLFGEIPVKLKDCRALKQLDLSNNTLNGSIPLELFELVELTDL…	1006	3021	https://onlinelibrary.wiley.com/doi/full/10.1111/pbi.13558
PlantKGA_431	Apiales	Araliaceae	Panax	notoginseng	Panax notoginseng		三七	chromosome	Yes	转录本	Pno10G002265t1	Pno10G002265t11288xxPlantKGA_431	Pno10G002265	L	partial	10	22313099	22316119	+	Pfam	PF13855	Leucine rich repeat	Leucine-rich repeat	298	358	NLQNLDLSANRLTGEIPDELGNMGQLVYLVLSSNNLSGLIPKSICSNATSLEHLILGGNQL	3.3e-07	MTILPKQIHPNLLVFVFLGFFLCGHVLCKNSSESTLAILLEVRQSFVDDPQNVLQDWSKKNSNFCTWTGVSCGRDLADGSLHVLSLNLSDSSLGGSLSPALGRLNDLLHLDLSSNYLSGPIPPNLSNLSSLTSLFLFSNQLSGPIPTQLGSLYNLQFLRIGDNGLAGEIPATFGDLENLVVLALASCSLTGPIPPEIGKLRGLENLVLQENQLTGQIPAELGNCSSLVVFTAAVNNLTGSIPAQLGNLKNLEKLNLANNTLSAEIPSELGGLSQLVYLNFLGNQLEGSIPKSLEKLGNLQNLDLSANRLTGEIPDELGNMGQLVYLVLSSNNLSGLIPKSICSNATSLEHLILGGNQLFGEIPVKLKDCRALKQLDLSNNTLNGSIPLELFELVELTDL…	1006	3021	https://onlinelibrary.wiley.com/doi/full/10.1111/pbi.13558
PlantKGA_431	Apiales	Araliaceae	Panax	notoginseng	Panax notoginseng		三七	chromosome	Yes	转录本	Pno10G002265t1	Pno10G002265t11288xxPlantKGA_431	Pno10G002265	L	partial	10	22313099	22316119	+	Pfam	PF13855	Leucine rich repeat	Leucine-rich repeat	609	669	PSLERLRLGNNQFTGQIPWTLGEIQELRLLDLSGNSLTGSIPPQLSMCKKLTHIDLNNNHI	1.9e-06	MTILPKQIHPNLLVFVFLGFFLCGHVLCKNSSESTLAILLEVRQSFVDDPQNVLQDWSKKNSNFCTWTGVSCGRDLADGSLHVLSLNLSDSSLGGSLSPALGRLNDLLHLDLSSNYLSGPIPPNLSNLSSLTSLFLFSNQLSGPIPTQLGSLYNLQFLRIGDNGLAGEIPATFGDLENLVVLALASCSLTGPIPPEIGKLRGLENLVLQENQLTGQIPAELGNCSSLVVFTAAVNNLTGSIPAQLGNLKNLEKLNLANNTLSAEIPSELGGLSQLVYLNFLGNQLEGSIPKSLEKLGNLQNLDLSANRLTGEIPDELGNMGQLVYLVLSSNNLSGLIPKSICSNATSLEHLILGGNQLFGEIPVKLKDCRALKQLDLSNNTLNGSIPLELFELVELTDL…	1006	3021	https://onlinelibrary.wiley.com/doi/full/10.1111/pbi.13558
PlantKGA_431	Apiales	Araliaceae	Panax	notoginseng	Panax notoginseng		三七	chromosome	Yes	转录本	Pno10G002265t1	Pno10G002265t11288xxPlantKGA_431	Pno10G002265	L	partial	10	22313099	22316119	+	Pfam	PF13855	Leucine rich repeat	Leucine-rich repeat	782	838	ILDLSYNNLTGQIPFSIGKLIKLEVLDLSENELVGEIPPQLGEMSSLSHLNLSYNNL	2.1e-07	MTILPKQIHPNLLVFVFLGFFLCGHVLCKNSSESTLAILLEVRQSFVDDPQNVLQDWSKKNSNFCTWTGVSCGRDLADGSLHVLSLNLSDSSLGGSLSPALGRLNDLLHLDLSSNYLSGPIPPNLSNLSSLTSLFLFSNQLSGPIPTQLGSLYNLQFLRIGDNGLAGEIPATFGDLENLVVLALASCSLTGPIPPEIGKLRGLENLVLQENQLTGQIPAELGNCSSLVVFTAAVNNLTGSIPAQLGNLKNLEKLNLANNTLSAEIPSELGGLSQLVYLNFLGNQLEGSIPKSLEKLGNLQNLDLSANRLTGEIPDELGNMGQLVYLVLSSNNLSGLIPKSICSNATSLEHLILGGNQLFGEIPVKLKDCRALKQLDLSNNTLNGSIPLELFELVELTDL…	1006	3021	https://onlinelibrary.wiley.com/doi/full/10.1111/pbi.13558
PlantKGA_431	Apiales	Araliaceae	Panax	notoginseng	Panax notoginseng		三七	chromosome	Yes	转录本	Pno10G002265t1	Pno10G002265t11288xxPlantKGA_431	Pno10G002265	L	partial	10	22313099	22316119	+	Pfam	PF13855	Leucine rich repeat	Leucine-rich repeat	515	574	QLNVLDLADNRFSGGIPATFGHLRALEKLMLYNNSLEGNIPIGLSYVSNLTRVNLSNNRL	5e-07	MTILPKQIHPNLLVFVFLGFFLCGHVLCKNSSESTLAILLEVRQSFVDDPQNVLQDWSKKNSNFCTWTGVSCGRDLADGSLHVLSLNLSDSSLGGSLSPALGRLNDLLHLDLSSNYLSGPIPPNLSNLSSLTSLFLFSNQLSGPIPTQLGSLYNLQFLRIGDNGLAGEIPATFGDLENLVVLALASCSLTGPIPPEIGKLRGLENLVLQENQLTGQIPAELGNCSSLVVFTAAVNNLTGSIPAQLGNLKNLEKLNLANNTLSAEIPSELGGLSQLVYLNFLGNQLEGSIPKSLEKLGNLQNLDLSANRLTGEIPDELGNMGQLVYLVLSSNNLSGLIPKSICSNATSLEHLILGGNQLFGEIPVKLKDCRALKQLDLSNNTLNGSIPLELFELVELTDL…	1006	3021	https://onlinelibrary.wiley.com/doi/full/10.1111/pbi.13558
PlantKGA_431	Apiales	Araliaceae	Panax	notoginseng	Panax notoginseng		三七	chromosome	Yes	转录本	Pno10G002596t1	Pno10G002596t11288xxPlantKGA_431	Pno10G002596	L	partial	10	25129304	25130252	-	Pfam	PF13516	Leucine Rich repeat	Leucine-rich repeat	49	65	CASLKRLHLSGCRFVTD	1.4	MAESHCSFTGITDTGIATIGTGLSSLQWLDVSYCRKLTDKGLSAVAEGCASLKRLHLSGCRFVTDALLGALSRNCHNLEELGLQGCTNITDSRLVVLVDGCQRMKYLDINKYSSVGDNGISNISKACSASLKTLKLLDCYKLGDTAILSLANFCKNLEIFLIIGGCRDISHHLEILMLRTARK	183	949	https://onlinelibrary.wiley.com/doi/full/10.1111/pbi.13558
PlantKGA_431	Apiales	Araliaceae	Panax	notoginseng	Panax notoginseng		三七	chromosome	Yes	转录本	Pno10G002596t1	Pno10G002596t11288xxPlantKGA_431	Pno10G002596	L	partial	10	25129304	25130252	-	Pfam	PF13516	Leucine Rich repeat	Leucine-rich repeat	24	46	SSLQWLDVSYCRKLTDKGLSAVA	0.037	MAESHCSFTGITDTGIATIGTGLSSLQWLDVSYCRKLTDKGLSAVAEGCASLKRLHLSGCRFVTDALLGALSRNCHNLEELGLQGCTNITDSRLVVLVDGCQRMKYLDINKYSSVGDNGISNISKACSASLKTLKLLDCYKLGDTAILSLANFCKNLEIFLIIGGCRDISHHLEILMLRTARK	183	949	https://onlinelibrary.wiley.com/doi/full/10.1111/pbi.13558
PlantKGA_431	Apiales	Araliaceae	Panax	notoginseng	Panax notoginseng		三七	chromosome	Yes	转录本	Pno10G002596t1	Pno10G002596t11288xxPlantKGA_431	Pno10G002596	L	partial	10	25129304	25130252	-	Pfam	PF13516	Leucine Rich repeat	Leucine-rich repeat	74	91	NCHNLEELGLQGCTNITD	1.5	MAESHCSFTGITDTGIATIGTGLSSLQWLDVSYCRKLTDKGLSAVAEGCASLKRLHLSGCRFVTDALLGALSRNCHNLEELGLQGCTNITDSRLVVLVDGCQRMKYLDINKYSSVGDNGISNISKACSASLKTLKLLDCYKLGDTAILSLANFCKNLEIFLIIGGCRDISHHLEILMLRTARK	183	949	https://onlinelibrary.wiley.com/doi/full/10.1111/pbi.13558
PlantKGA_431	Apiales	Araliaceae	Panax	notoginseng	Panax notoginseng		三七	chromosome	Yes	转录本	Pno10G005647t1	Pno10G005647t11288xxPlantKGA_431	Pno10G005647	L	partial	10	47058197	47066717	+	Pfam	PF13516	Leucine Rich repeat	Leucine-rich repeat	549	570	RQLQHLDLSGFNGITDEGVLPL	0.3	MLQLQQSSKVGGGGDCGSLGDGSSGGGGKGVCWDRRNGGNGDCVDRFAGGWERGDDNFCPGGSVYPNPKESSLFLSLGHHVDVYFPPHKRSRISAPFVFSGEMFEQKQASIEDLPDECLFEVFRRLPGGQERSSCACVSKRWLMLLSSIRNDEICPTKVAQSLEPKETLVSTEAVNAFETNKKGAVVDKVETLIEDLELEGNGYLSRCLEGKIATDVRLASIAIGTSSRGGLGKLSIRGSNSSRGITDLGLKAIACGCSSLRVLSLWNVFTIGDEGLSEIASGCRMLEKLDLCQCPTISDKSLLAVANNCPNLTSLEIESCSRIGNESLQAVGRLCPNLKSISIKNCPLVGDQGIASLVSSTSYSLTKMNLQALNISDMSLAVIGHYGKTLTDLALTGL…	713	8521	https://onlinelibrary.wiley.com/doi/full/10.1111/pbi.13558
PlantKGA_431	Apiales	Araliaceae	Panax	notoginseng	Panax notoginseng		三七	chromosome	Yes	转录本	Pno10G005647t1	Pno10G005647t11288xxPlantKGA_431	Pno10G005647	L	partial	10	47058197	47066717	+	Pfam	PF13516	Leucine Rich repeat	Leucine-rich repeat	578	598	LTKVNLSSCANLTDKAVSAIA	0.99	MLQLQQSSKVGGGGDCGSLGDGSSGGGGKGVCWDRRNGGNGDCVDRFAGGWERGDDNFCPGGSVYPNPKESSLFLSLGHHVDVYFPPHKRSRISAPFVFSGEMFEQKQASIEDLPDECLFEVFRRLPGGQERSSCACVSKRWLMLLSSIRNDEICPTKVAQSLEPKETLVSTEAVNAFETNKKGAVVDKVETLIEDLELEGNGYLSRCLEGKIATDVRLASIAIGTSSRGGLGKLSIRGSNSSRGITDLGLKAIACGCSSLRVLSLWNVFTIGDEGLSEIASGCRMLEKLDLCQCPTISDKSLLAVANNCPNLTSLEIESCSRIGNESLQAVGRLCPNLKSISIKNCPLVGDQGIASLVSSTSYSLTKMNLQALNISDMSLAVIGHYGKTLTDLALTGL…	713	8521	https://onlinelibrary.wiley.com/doi/full/10.1111/pbi.13558
PlantKGA_431	Apiales	Araliaceae	Panax	notoginseng	Panax notoginseng		三七	chromosome	Yes	转录本	Pno10G005647t1	Pno10G005647t11288xxPlantKGA_431	Pno10G005647	L	partial	10	47058197	47066717	+	Pfam	PF13516	Leucine Rich repeat	Leucine-rich repeat	309	332	NCPNLTSLEIESCSRIGNESLQAV	0.65	MLQLQQSSKVGGGGDCGSLGDGSSGGGGKGVCWDRRNGGNGDCVDRFAGGWERGDDNFCPGGSVYPNPKESSLFLSLGHHVDVYFPPHKRSRISAPFVFSGEMFEQKQASIEDLPDECLFEVFRRLPGGQERSSCACVSKRWLMLLSSIRNDEICPTKVAQSLEPKETLVSTEAVNAFETNKKGAVVDKVETLIEDLELEGNGYLSRCLEGKIATDVRLASIAIGTSSRGGLGKLSIRGSNSSRGITDLGLKAIACGCSSLRVLSLWNVFTIGDEGLSEIASGCRMLEKLDLCQCPTISDKSLLAVANNCPNLTSLEIESCSRIGNESLQAVGRLCPNLKSISIKNCPLVGDQGIASLVSSTSYSLTKMNLQALNISDMSLAVIGHYGKTLTDLALTGL…	713	8521	https://onlinelibrary.wiley.com/doi/full/10.1111/pbi.13558
PlantKGA_431	Apiales	Araliaceae	Panax	notoginseng	Panax notoginseng		三七	chromosome	Yes	转录本	Pno10G006579t1	Pno10G006579t11288xxPlantKGA_431	Pno10G006579	L	partial	10	524375	525253	+	Pfam	PF13516	Leucine Rich repeat	Leucine-rich repeat	88	110	TRLKILDLRLCRSIGDESIMAIA	0.0032	MHKSSRLRCNISNTGLETLAKSCLKYQRCGFHGCPQTLVYIEADSCKLETEGIVDIVSGGGLEYLNISNLNWAIPGNGLTAIGTGFATRLKILDLRLCRSIGDESIMAIAKGCPLLQEWNLALCHEIRIQGWESIGLNCHNLERLHVNRCRYLCDRGLQALRNGCRRLSFLYITRCRQITYTAIELFKYLRSDVEIKEEEIMCIAPDSAFR	211	879	https://onlinelibrary.wiley.com/doi/full/10.1111/pbi.13558
PlantKGA_431	Apiales	Araliaceae	Panax	notoginseng	Panax notoginseng		三七	chromosome	Yes	转录本	Pno10G006579t1	Pno10G006579t11288xxPlantKGA_431	Pno10G006579	L	partial	10	524375	525253	+	Pfam	PF13516	Leucine Rich repeat	Leucine-rich repeat	138	161	NCHNLERLHVNRCRYLCDRGLQAL	0.095	MHKSSRLRCNISNTGLETLAKSCLKYQRCGFHGCPQTLVYIEADSCKLETEGIVDIVSGGGLEYLNISNLNWAIPGNGLTAIGTGFATRLKILDLRLCRSIGDESIMAIAKGCPLLQEWNLALCHEIRIQGWESIGLNCHNLERLHVNRCRYLCDRGLQALRNGCRRLSFLYITRCRQITYTAIELFKYLRSDVEIKEEEIMCIAPDSAFR	211	879	https://onlinelibrary.wiley.com/doi/full/10.1111/pbi.13558
PlantKGA_431	Apiales	Araliaceae	Panax	notoginseng	Panax notoginseng		三七	chromosome	Yes	转录本	Pno10G007914t1	Pno10G007914t11288xxPlantKGA_431	Pno10G007914	L	partial	10	60057872	60065327	-	Pfam	PF08263	Leucine rich repeat N-terminal domain	Leucine-rich repeat-containing N-terminal, plant-type	21	60	TDHLALLAFKSAINVGPSNFLKTNWIENSHFCYWYGVTCS	9.2e-09	MAQLSVQFFMISLAISSSNLTDHLALLAFKSAINVGPSNFLKTNWIENSHFCYWYGVTCSLRRQRVTALRLPSMGLGGTISPRIENLSFLTNLSLSSNNFHGDLPHELSRLRHLKSLVLHLNELGGELPASLQHYQKLEALSGHAYVAMISFKSSPPSFDERLDLVLSSFHFLELDNAPVLSHIDARDSYEKLSLLTKMVDKCPSVELSLLPRLPQFCCKGPNIRLSPILKLPQPCLLSGVVALTDGLIRCLDREKLLPLYHMMNRYRQQLAVDLLARVKTLGQEITALPPSSERDATLDLVARLSTGL	309	7456	https://onlinelibrary.wiley.com/doi/full/10.1111/pbi.13558
PlantKGA_431	Apiales	Araliaceae	Panax	notoginseng	Panax notoginseng		三七	chromosome	Yes	转录本	Pno10G009380t1	Pno10G009380t11288xxPlantKGA_431	Pno10G009380	L	partial	10	68706567	68709110	+	Pfam	PF08263	Leucine rich repeat N-terminal domain	Leucine-rich repeat-containing N-terminal, plant-type	30	71	NEEGLALLKFRDRVFNDPFGALLDWNEEVGVIDPCSWSRVEC	4.2e-08	MEVMGLMLGVPIEADLYLQFTNVNLSWSLNEEGLALLKFRDRVFNDPFGALLDWNEEVGVIDPCSWSRVECANGNVVALQLFAKVYVFELLIVTIRVVDVFAMPQSGTAVSVQAVDYVFQTNMLDMLKSTIIGDTLARMLEFSKVEVLQRNHVGDWGTEVGEDEFGYMLADILKQNKVNNSGIRFDPAARTSLAFV	196	2544	https://onlinelibrary.wiley.com/doi/full/10.1111/pbi.13558
PlantKGA_431	Apiales	Araliaceae	Panax	notoginseng	Panax notoginseng		三七	chromosome	Yes	转录本	Pno10G011260t2	Pno10G011260t21288xxPlantKGA_431	Pno10G011260	L	partial	10	8020871	8023619	+	Pfam	PF13855	Leucine rich repeat	Leucine-rich repeat	258	315	ALKKLDVHANQLINLPDSFGELINLSDLDLHANRLKSLPASFGNLANLVNFDLSSNQF	7.6e-08	MAEIPKKDPSPAYLEAVEEIMKTYRSLPPRPTVEELEAAISVVKTVNSEEQLRLEEISNQLALQDVPPELFSVLQQVRKTMVLLQSHEQSKEALLLVELDKFHHTFDELIQRASALVSGDTQMEDQSNFECPIGKIEREVVINDKVVKDEIVIKKREADEESKDGNWKGLVKSSSTKAINFSSGDGEAEKEKLSLMNVAALIENSAKFGDIVLDLQGKLMDNIEWLPVSLGKLSHIVELNLSNNKIMALPTTIGSLTALKKLDVHANQLINLPDSFGELINLSDLDLHANRLKSLPASFGNLANLVNFDLSSNQFSSLPDIIGNLTSLKVLNVETNELVELPYTIGSCSSLVELRLDFNQLRGLPEALGKLELLEILTLHYNRIGRLPTTMGNLTHLRE…	526	2749	https://onlinelibrary.wiley.com/doi/full/10.1111/pbi.13558
PlantKGA_431	Apiales	Araliaceae	Panax	notoginseng	Panax notoginseng		三七	chromosome	Yes	转录本	Pno10G011260t2	Pno10G011260t21288xxPlantKGA_431	Pno10G011260	L	partial	10	8020871	8023619	+	Pfam	PF13855	Leucine rich repeat	Leucine-rich repeat	350	407	SLVELRLDFNQLRGLPEALGKLELLEILTLHYNRIGRLPTTMGNLTHLRELDANFNEL	1.7e-06	MAEIPKKDPSPAYLEAVEEIMKTYRSLPPRPTVEELEAAISVVKTVNSEEQLRLEEISNQLALQDVPPELFSVLQQVRKTMVLLQSHEQSKEALLLVELDKFHHTFDELIQRASALVSGDTQMEDQSNFECPIGKIEREVVINDKVVKDEIVIKKREADEESKDGNWKGLVKSSSTKAINFSSGDGEAEKEKLSLMNVAALIENSAKFGDIVLDLQGKLMDNIEWLPVSLGKLSHIVELNLSNNKIMALPTTIGSLTALKKLDVHANQLINLPDSFGELINLSDLDLHANRLKSLPASFGNLANLVNFDLSSNQFSSLPDIIGNLTSLKVLNVETNELVELPYTIGSCSSLVELRLDFNQLRGLPEALGKLELLEILTLHYNRIGRLPTTMGNLTHLRE…	526	2749	https://onlinelibrary.wiley.com/doi/full/10.1111/pbi.13558
PlantKGA_431	Apiales	Araliaceae	Panax	notoginseng	Panax notoginseng		三七	chromosome	Yes	转录本	Pno10G011421t1	Pno10G011421t11288xxPlantKGA_431	Pno10G011421	L	partial	10	811340	812509	+	Pfam	PF13516	Leucine Rich repeat	Leucine-rich repeat	167	187	LKDVNLSYCPLITDIGIRALS	0.23	MEISSKDGPTSIMHLPDDCLYFIFQWLDSGFDRKSFGLTCHRWLHIENSSRRSLQFQCSFRQVNHSSLSRTSTNIGPFHLYRLLNRFQQLQLLSLSGCINLPDSGLTQLQYFGSKLQTLHLDCCFGITDDGLSLVASGCHSLTTISLYRCNISNTGLETLAKSCLALKDVNLSYCPLITDIGIRALSQNCCQLRAVRISNCRNISGVGFHGCPQTLVYIEADSCKLETEGIVDIVSGGGLEYLNISNLNWAIPGNGLTAIGTGFATRLKILDLRLCRSIGDESIMAIAKGCPLLQEWNLALCHEIRIQGWESIGLNCHNLERLHVNRCRYLCDRGLQALRNGCRRLSFLYITRCRQITYTAIELFKYLRSDVEIKEEEIMCIAPDSAFR	389	1170	https://onlinelibrary.wiley.com/doi/full/10.1111/pbi.13558
PlantKGA_431	Apiales	Araliaceae	Panax	notoginseng	Panax notoginseng		三七	chromosome	Yes	转录本	Pno10G011421t1	Pno10G011421t11288xxPlantKGA_431	Pno10G011421	L	partial	10	811340	812509	+	Pfam	PF13516	Leucine Rich repeat	Leucine-rich repeat	316	339	NCHNLERLHVNRCRYLCDRGLQAL	0.21	MEISSKDGPTSIMHLPDDCLYFIFQWLDSGFDRKSFGLTCHRWLHIENSSRRSLQFQCSFRQVNHSSLSRTSTNIGPFHLYRLLNRFQQLQLLSLSGCINLPDSGLTQLQYFGSKLQTLHLDCCFGITDDGLSLVASGCHSLTTISLYRCNISNTGLETLAKSCLALKDVNLSYCPLITDIGIRALSQNCCQLRAVRISNCRNISGVGFHGCPQTLVYIEADSCKLETEGIVDIVSGGGLEYLNISNLNWAIPGNGLTAIGTGFATRLKILDLRLCRSIGDESIMAIAKGCPLLQEWNLALCHEIRIQGWESIGLNCHNLERLHVNRCRYLCDRGLQALRNGCRRLSFLYITRCRQITYTAIELFKYLRSDVEIKEEEIMCIAPDSAFR	389	1170	https://onlinelibrary.wiley.com/doi/full/10.1111/pbi.13558
PlantKGA_431	Apiales	Araliaceae	Panax	notoginseng	Panax notoginseng		三七	chromosome	Yes	转录本	Pno10G011421t1	Pno10G011421t11288xxPlantKGA_431	Pno10G011421	L	partial	10	811340	812509	+	Pfam	PF13516	Leucine Rich repeat	Leucine-rich repeat	115	134	KLQTLHLDCCFGITDDGLSL	1.2	MEISSKDGPTSIMHLPDDCLYFIFQWLDSGFDRKSFGLTCHRWLHIENSSRRSLQFQCSFRQVNHSSLSRTSTNIGPFHLYRLLNRFQQLQLLSLSGCINLPDSGLTQLQYFGSKLQTLHLDCCFGITDDGLSLVASGCHSLTTISLYRCNISNTGLETLAKSCLALKDVNLSYCPLITDIGIRALSQNCCQLRAVRISNCRNISGVGFHGCPQTLVYIEADSCKLETEGIVDIVSGGGLEYLNISNLNWAIPGNGLTAIGTGFATRLKILDLRLCRSIGDESIMAIAKGCPLLQEWNLALCHEIRIQGWESIGLNCHNLERLHVNRCRYLCDRGLQALRNGCRRLSFLYITRCRQITYTAIELFKYLRSDVEIKEEEIMCIAPDSAFR	389	1170	https://onlinelibrary.wiley.com/doi/full/10.1111/pbi.13558
PlantKGA_431	Apiales	Araliaceae	Panax	notoginseng	Panax notoginseng		三七	chromosome	Yes	转录本	Pno10G011421t1	Pno10G011421t11288xxPlantKGA_431	Pno10G011421	L	partial	10	811340	812509	+	Pfam	PF13516	Leucine Rich repeat	Leucine-rich repeat	139	161	CHSLTTISLYRCNISNTGLETLA	0.22	MEISSKDGPTSIMHLPDDCLYFIFQWLDSGFDRKSFGLTCHRWLHIENSSRRSLQFQCSFRQVNHSSLSRTSTNIGPFHLYRLLNRFQQLQLLSLSGCINLPDSGLTQLQYFGSKLQTLHLDCCFGITDDGLSLVASGCHSLTTISLYRCNISNTGLETLAKSCLALKDVNLSYCPLITDIGIRALSQNCCQLRAVRISNCRNISGVGFHGCPQTLVYIEADSCKLETEGIVDIVSGGGLEYLNISNLNWAIPGNGLTAIGTGFATRLKILDLRLCRSIGDESIMAIAKGCPLLQEWNLALCHEIRIQGWESIGLNCHNLERLHVNRCRYLCDRGLQALRNGCRRLSFLYITRCRQITYTAIELFKYLRSDVEIKEEEIMCIAPDSAFR	389	1170	https://onlinelibrary.wiley.com/doi/full/10.1111/pbi.13558
PlantKGA_431	Apiales	Araliaceae	Panax	notoginseng	Panax notoginseng		三七	chromosome	Yes	转录本	Pno10G011421t1	Pno10G011421t11288xxPlantKGA_431	Pno10G011421	L	partial	10	811340	812509	+	Pfam	PF13516	Leucine Rich repeat	Leucine-rich repeat	266	288	TRLKILDLRLCRSIGDESIMAIA	0.0072	MEISSKDGPTSIMHLPDDCLYFIFQWLDSGFDRKSFGLTCHRWLHIENSSRRSLQFQCSFRQVNHSSLSRTSTNIGPFHLYRLLNRFQQLQLLSLSGCINLPDSGLTQLQYFGSKLQTLHLDCCFGITDDGLSLVASGCHSLTTISLYRCNISNTGLETLAKSCLALKDVNLSYCPLITDIGIRALSQNCCQLRAVRISNCRNISGVGFHGCPQTLVYIEADSCKLETEGIVDIVSGGGLEYLNISNLNWAIPGNGLTAIGTGFATRLKILDLRLCRSIGDESIMAIAKGCPLLQEWNLALCHEIRIQGWESIGLNCHNLERLHVNRCRYLCDRGLQALRNGCRRLSFLYITRCRQITYTAIELFKYLRSDVEIKEEEIMCIAPDSAFR	389	1170	https://onlinelibrary.wiley.com/doi/full/10.1111/pbi.13558
PlantKGA_431	Apiales	Araliaceae	Panax	notoginseng	Panax notoginseng		三七	chromosome	Yes	转录本	Pno10G013352t1	Pno10G013352t11288xxPlantKGA_431	Pno10G013352	L	partial	10	9328484	9338058	+	Pfam	PF08263	Leucine rich repeat N-terminal domain	Leucine-rich repeat-containing N-terminal, plant-type	44	81	ETDRQALLSIKGLVKDPYEALSSWNDSHHFCNWHGVIC	1.9e-10	MESTKMIFSLVTSYYFLSYYYYYFCCMHSLEKLAASSSYGFSNETDRQALLSIKGLVKDPYEALSSWNDSHHFCNWHGVICGGHQLQRVTALNLSSLKLVGSLSPSIGNLTFLEDIDLQGNNFRATVPQEIGRLFRLKYLPLANNAFQESLATLTPFTSITFNSGESNVENCKPEVAKTGLGSSAAMTTAVVAALLNYLGVVNLSSLSKDRHHEMKDSADLNVVHVIAQTAHCIAQGKVGSGFDVSSAVYGSQRYVRFSPEVLSSAQGAVEGKPLDEVIIDVLKGKWDHESTEFSLPPLMTLIEPESQTQLLDATMMMEGVVLAGVPGAGGFDAIFAVTLGDTRSTNLANAWSSDNVLAMLVREDPHGVALESSDPRNSHQPI	383	9575	https://onlinelibrary.wiley.com/doi/full/10.1111/pbi.13558
PlantKGA_431	Apiales	Araliaceae	Panax	notoginseng	Panax notoginseng		三七	chromosome	Yes	转录本	Pno11G003820t1	Pno11G003820t11288xxPlantKGA_431	Pno11G003820	L	partial	11	2787642	2788956	-	Pfam	PF13855	Leucine rich repeat	Leucine-rich repeat	145	205	SISTLDLSTNNLTSSMNSWLFNLSSSLVYLNLGRNKLKGPIPNALSGLTSLKNLYLFENQL	1.2e-08	MIWRHVGLFHISLVTSQNCIIYLSFNHFDTCIPGFIGSLTSLKNLVLSTANFSGAIPYQLGNLSNLQYLDLGNNYGMFLKGGNLDWLAHLSSMKHLDLSYVNLSRANYWIDTIKNLPFLSDLVLVNCELSQVMYPFLSLTNSSSSISTLDLSTNNLTSSMNSWLFNLSSSLVYLNLGRNKLKGPIPNALSGLTSLKNLYLFENQLDGIPKSFGNLCNLQRLRFILEQL	228	1315	https://onlinelibrary.wiley.com/doi/full/10.1111/pbi.13558
PlantKGA_431	Apiales	Araliaceae	Panax	notoginseng	Panax notoginseng		三七	chromosome	Yes	转录本	Pno11G004945t1	Pno11G004945t11288xxPlantKGA_431	Pno11G004945	L	partial	11	3438014	3444270	-	Pfam	PF08263	Leucine rich repeat N-terminal domain	Leucine-rich repeat-containing N-terminal, plant-type	38	64	DDYQRLSSWAIEEDKKDCCKWRAVECS	0.00013	MVDKGLDASTTSMVLDLLSRKEPDPTLLVMHLKFLPTDDYQRLSSWAIEEDKKDCCKWRAVECSNITGHVIKFDLSYSSYETNPLRGLGKLVCPVCLETGLPNDKGLLRRLDARQLLDKMYNGRLLPNS	129	6257	https://onlinelibrary.wiley.com/doi/full/10.1111/pbi.13558
PlantKGA_431	Apiales	Araliaceae	Panax	notoginseng	Panax notoginseng		三七	chromosome	Yes	转录本	Pno11G009930t1	Pno11G009930t11288xxPlantKGA_431	Pno11G009930	L	partial	11	6370678	6371893	+	Pfam	PF13855	Leucine rich repeat	Leucine-rich repeat	152	212	SRLTVLNVADNNITGWIPRSIANLSSLMHLDLRNNQIRGTIPRNFGKLRMLSRALLSGNRI	5.6e-10	MNAFFFITAILLASAAAVTCCPPSDRAALLAFRAALNESHLGIFNTWKGNDCCHHWYGVSCDTTNGRVADITLRGESEDPIFQRAHRTGYMTGSISPAICKLTWLSSITIADWKGISGPIPSCITYLPYLRILDLIGNRINGQIPVDIGRLSRLTVLNVADNNITGWIPRSIANLSSLMHLDLRNNQIRGTIPRNFGKLRMLSRALLSGNRISGPIPNSISYVYRLSDLDLSLNRISGSIPPSLGKMGVLATLNLDGNNISGLIPPTLINSGISILNLSKNSLEGYIPDVFGPRSYFTALDLSYNRLKGPIPKSISAASYVGHLDLSHNHLCGQIPVGSPFDHLEASSFMSNDCLCGKPLRPC	363	1216	https://onlinelibrary.wiley.com/doi/full/10.1111/pbi.13558
PlantKGA_431	Apiales	Araliaceae	Panax	notoginseng	Panax notoginseng		三七	chromosome	Yes	转录本	Pno11G009930t1	Pno11G009930t11288xxPlantKGA_431	Pno11G009930	L	partial	11	6370678	6371893	+	Pfam	PF08263	Leucine rich repeat N-terminal domain	Leucine-rich repeat-containing N-terminal, plant-type	23	62	PSDRAALLAFRAALNESHLGIFNTWKGNDCCHHWYGVSCD	7.1e-10	MNAFFFITAILLASAAAVTCCPPSDRAALLAFRAALNESHLGIFNTWKGNDCCHHWYGVSCDTTNGRVADITLRGESEDPIFQRAHRTGYMTGSISPAICKLTWLSSITIADWKGISGPIPSCITYLPYLRILDLIGNRINGQIPVDIGRLSRLTVLNVADNNITGWIPRSIANLSSLMHLDLRNNQIRGTIPRNFGKLRMLSRALLSGNRISGPIPNSISYVYRLSDLDLSLNRISGSIPPSLGKMGVLATLNLDGNNISGLIPPTLINSGISILNLSKNSLEGYIPDVFGPRSYFTALDLSYNRLKGPIPKSISAASYVGHLDLSHNHLCGQIPVGSPFDHLEASSFMSNDCLCGKPLRPC	363	1216	https://onlinelibrary.wiley.com/doi/full/10.1111/pbi.13558
PlantKGA_431	Apiales	Araliaceae	Panax	notoginseng	Panax notoginseng		三七	chromosome	Yes	转录本	Pno11G012511t1	Pno11G012511t11288xxPlantKGA_431	Pno11G012511	L	partial	11	79312084	79328993	+	Pfam	PF08263	Leucine rich repeat N-terminal domain	Leucine-rich repeat-containing N-terminal, plant-type	217	254	GATLLEIKKSFRDVDNVLYDWTDSPSSDYCVWRGVTCD	7e-10	METLTSSATIVSSPSYLPTFSPKSKDPSSISGRILRFSISPKNNGNELELRSDSNDSSLVPILNNRTLSKDAAMGLVLSAANVRGWTTCSGMESPPVPAGSESESSTNQLSSTFPRSLFTKSPRHCMRVAFTCNVCGQRTTRAINPHAYTDGTVFVQFQFWCIMEFSLDYDWCAVVKKLLGILFSGIVDAGRHPSIEVALLEIALLHRAEEKLQAHGATLLEIKKSFRDVDNVLYDWTDSPSSDYCVWRGVTCDNVTFNVITLNLSGSNLDGEISTAFRDLKGLLSIDLRGNLLSRQIPDEIGDCATLKSLADSRKLGSGHPIGLPEVGTRRMTDMGGPSRVVEEEPRDIHVVYEAPLIAEPISAVAPFDDDDDEEEEMKPLPEESDLEEEPIEEDPEP…	480	16910	https://onlinelibrary.wiley.com/doi/full/10.1111/pbi.13558
PlantKGA_431	Apiales	Araliaceae	Panax	notoginseng	Panax notoginseng		三七	chromosome	Yes	转录本	Pno12G000792t1	Pno12G000792t11288xxPlantKGA_431	Pno12G000792	L	partial	12	119942969	119944828	-	Pfam	PF08263	Leucine rich repeat N-terminal domain	Leucine-rich repeat-containing N-terminal, plant-type	32	71	EDEAASLLTWKASLDHNPSQSLSSWVGSSPCNNWTGIGCN	1.9e-08	MKHLNHHHFLHVFFILAILLISSSSSKQVQLEDEAASLLTWKASLDHNPSQSLSSWVGSSPCNNWTGIGCNKAGSHVSRINLESYGLKGTLHQLNFSSFPQLINLTLSNNSLYGTIPYEIGLLTNLRICDMYGNQLSGSIPQEIGMLRSLEILYLDTNNLTGSIPSTIGSLGNLTILYLYKNLLVGSIPKEIGKLRSLTELDLSKNHLTGTIPPDIGLITKLRLCHMFSNQLSGSIPQEIGMLSFLEELSLSTNNLTGSIPSSLGKLKSLVDLRLFTNDLTGSIPPEMNNLTYLKVFQMADNMLTGHLPQDICRGGLLERFTVDTNFFTGPIPISLKNCTNLYRLRLDGNQFTGNISEDFGMYPKLDYIDLSNNKFYGDLSLKWGLCKNLRTLKIANNY…	619	1860	https://onlinelibrary.wiley.com/doi/full/10.1111/pbi.13558
PlantKGA_431	Apiales	Araliaceae	Panax	notoginseng	Panax notoginseng		三七	chromosome	Yes	转录本	Pno12G000792t1	Pno12G000792t11288xxPlantKGA_431	Pno12G000792	L	partial	12	119942969	119944828	-	Pfam	PF13855	Leucine rich repeat	Leucine-rich repeat	389	448	NLRTLKIANNYLTGRIPPEFGKVTQLVRLDLSSNHIAGEIPKSFGNIRSLFDLKLQDNNL	1e-07	MKHLNHHHFLHVFFILAILLISSSSSKQVQLEDEAASLLTWKASLDHNPSQSLSSWVGSSPCNNWTGIGCNKAGSHVSRINLESYGLKGTLHQLNFSSFPQLINLTLSNNSLYGTIPYEIGLLTNLRICDMYGNQLSGSIPQEIGMLRSLEILYLDTNNLTGSIPSTIGSLGNLTILYLYKNLLVGSIPKEIGKLRSLTELDLSKNHLTGTIPPDIGLITKLRLCHMFSNQLSGSIPQEIGMLSFLEELSLSTNNLTGSIPSSLGKLKSLVDLRLFTNDLTGSIPPEMNNLTYLKVFQMADNMLTGHLPQDICRGGLLERFTVDTNFFTGPIPISLKNCTNLYRLRLDGNQFTGNISEDFGMYPKLDYIDLSNNKFYGDLSLKWGLCKNLRTLKIANNY…	619	1860	https://onlinelibrary.wiley.com/doi/full/10.1111/pbi.13558
PlantKGA_431	Apiales	Araliaceae	Panax	notoginseng	Panax notoginseng		三七	chromosome	Yes	转录本	Pno12G000792t1	Pno12G000792t11288xxPlantKGA_431	Pno12G000792	L	partial	12	119942969	119944828	-	Pfam	PF13855	Leucine rich repeat	Leucine-rich repeat	148	208	RSLEILYLDTNNLTGSIPSTIGSLGNLTILYLYKNLLVGSIPKEIGKLRSLTELDLSKNHL	1.7e-09	MKHLNHHHFLHVFFILAILLISSSSSKQVQLEDEAASLLTWKASLDHNPSQSLSSWVGSSPCNNWTGIGCNKAGSHVSRINLESYGLKGTLHQLNFSSFPQLINLTLSNNSLYGTIPYEIGLLTNLRICDMYGNQLSGSIPQEIGMLRSLEILYLDTNNLTGSIPSTIGSLGNLTILYLYKNLLVGSIPKEIGKLRSLTELDLSKNHLTGTIPPDIGLITKLRLCHMFSNQLSGSIPQEIGMLSFLEELSLSTNNLTGSIPSSLGKLKSLVDLRLFTNDLTGSIPPEMNNLTYLKVFQMADNMLTGHLPQDICRGGLLERFTVDTNFFTGPIPISLKNCTNLYRLRLDGNQFTGNISEDFGMYPKLDYIDLSNNKFYGDLSLKWGLCKNLRTLKIANNY…	619	1860	https://onlinelibrary.wiley.com/doi/full/10.1111/pbi.13558
PlantKGA_431	Apiales	Araliaceae	Panax	notoginseng	Panax notoginseng		三七	chromosome	Yes	转录本	Pno12G002858t1	Pno12G002858t11288xxPlantKGA_431	Pno12G002858	L	partial	12	2661510	2663730	-	Pfam	PF13855	Leucine rich repeat	Leucine-rich repeat	130	189	TLQVLDLRGCSIVGAIPSTLGNLTNLSAIYLSDNELTGRIPSSLGQLLRLSVLDISHNKL	3.9e-08	MAMVDLRGFRVVLFILFLLFNSTFQQLGVVPLSSRIELVALLQLRSSLGLRTKEWPIKADPCSIWAGIQCQNGRVVGINISGFRRTRIGRKNPQFSVNSLANFSFLASFNASRFALPGSIPDWFGQRLITLQVLDLRGCSIVGAIPSTLGNLTNLSAIYLSDNELTGRIPSSLGQLLRLSVLDISHNKLTGSIPPSFGSLGNLTLLDMSVNYLSGTIPPAIGSLSKLKSLNLSSNSLSSLIPVQLSDLSSLVDLDLSFNSLSGLVASDFRVLRNLQNMVFGSNLLTGSLPGNLFAPLTQLQFIVLSHNNFTGELPDILWSMPALRFLDASANNFTGLLPNLSSVASATPAVFNLSWNMFYGGLTTIVRRFSFIDLSSNYFQGSVPEYVSSNASLNRNCL…	627	2221	https://onlinelibrary.wiley.com/doi/full/10.1111/pbi.13558
PlantKGA_431	Apiales	Araliaceae	Panax	notoginseng	Panax notoginseng		三七	chromosome	Yes	转录本	Pno12G002858t1	Pno12G002858t11288xxPlantKGA_431	Pno12G002858	L	partial	12	2661510	2663730	-	Pfam	PF13855	Leucine rich repeat	Leucine-rich repeat	202	261	NLTLLDMSVNYLSGTIPPAIGSLSKLKSLNLSSNSLSSLIPVQLSDLSSLVDLDLSFNSL	9e-08	MAMVDLRGFRVVLFILFLLFNSTFQQLGVVPLSSRIELVALLQLRSSLGLRTKEWPIKADPCSIWAGIQCQNGRVVGINISGFRRTRIGRKNPQFSVNSLANFSFLASFNASRFALPGSIPDWFGQRLITLQVLDLRGCSIVGAIPSTLGNLTNLSAIYLSDNELTGRIPSSLGQLLRLSVLDISHNKLTGSIPPSFGSLGNLTLLDMSVNYLSGTIPPAIGSLSKLKSLNLSSNSLSSLIPVQLSDLSSLVDLDLSFNSLSGLVASDFRVLRNLQNMVFGSNLLTGSLPGNLFAPLTQLQFIVLSHNNFTGELPDILWSMPALRFLDASANNFTGLLPNLSSVASATPAVFNLSWNMFYGGLTTIVRRFSFIDLSSNYFQGSVPEYVSSNASLNRNCL…	627	2221	https://onlinelibrary.wiley.com/doi/full/10.1111/pbi.13558
PlantKGA_431	Apiales	Araliaceae	Panax	notoginseng	Panax notoginseng		三七	chromosome	Yes	转录本	Pno12G003829t1	Pno12G003829t11288xxPlantKGA_431	Pno12G003829	L	partial	12	32815488	32817338	-	Pfam	PF13855	Leucine rich repeat	Leucine-rich repeat	124	183	KLTDLFLGENFLTGKLPPSLANLTQLQMLDISRNNISGFIPVGFRNLTNLGYLLLYKNDL	1.1e-07	MASSSSITRALLVLLLLASCANMILVAAAGKSPEAEALLRSGWWGSNNNNNTSIITVNTYHSHCNWIGINCNDAGSVTDIILDTNTGSEVGKLNFSAFPNLELIDLRSCGLHGSIPYQIGMLSKLTDLFLGENFLTGKLPPSLANLTQLQMLDISRNNISGFIPVGFRNLTNLGYLLLYKNDLVGSISSALGSLPTNLNTLYLYHNQFSGYIPSELGNLNMLRSLDLSNDNLDGSIPSSLDLSKNWFNGHIPKELGKCNQLENLSLSCNNFNGAIPVELESLSNLTYLNLSNNNLSGTIQICPCNGCDGSSIDLSGNYALKGNLTCQEMSSSNTTINNDIIFNKKNKRKRGLDTIKVVLPIVVFLTFLMIVLVLLNRLKAKRSQSQAQAIKNGDFCSIW…	530	1851	https://onlinelibrary.wiley.com/doi/full/10.1111/pbi.13558
PlantKGA_431	Apiales	Araliaceae	Panax	notoginseng	Panax notoginseng		三七	chromosome	Yes	转录本	Pno12G003830t1	Pno12G003830t11288xxPlantKGA_431	Pno12G003830	L	partial	12	3281661	3283931	+	Pfam	PF13855	Leucine rich repeat	Leucine-rich repeat	128	182	HINSNRFCGIIPEEFSKLTILRELDVSNNRFVGTFPKVVLGLPALIYLDLRYNDF	6.1e-07	MAINPKIFMIKALGCLLLVSISSVSSTLDDLPEGFEYEVDIRVTFANSRLRRAYIALQAWKKAIFSDPKNMTGNWVGPNVCAYNGVFCERALDDPKLTVVAGLDLNNGDIAGHLVTQLGLLTDIALFHINSNRFCGIIPEEFSKLTILRELDVSNNRFVGTFPKVVLGLPALIYLDLRYNDFEGPLPPELFDKPLDALFLNNNQFSSNIPENLGNLPVSVIVLADNQFSGCIPKSIGKMAKTLNELNFMNNNFTGCLPEEIGLLENLNVFDISHNNFVGTLPKGLAGLKQVNNIDVGHNKLAGPVLESVCSLPSLENFTYSYNYFEQEMRTCQAPRHKLVLDCVNNCIPDKPNQKSVDECIHVVSNPVNCEAVGCRGNPGHESPADNPPPSTPESPKSQ…	756	2271	https://onlinelibrary.wiley.com/doi/full/10.1111/pbi.13558
PlantKGA_431	Apiales	Araliaceae	Panax	notoginseng	Panax notoginseng		三七	chromosome	Yes	转录本	Pno12G004230t1	Pno12G004230t11288xxPlantKGA_431	Pno12G004230	L	partial	12	352533	357559	+	Pfam	PF13516	Leucine Rich repeat	Leucine-rich repeat	383	406	SNRDLSVLDLRDCRNLGDAALRAI	1	MEHSLDLLPSALLATIMTKLDVPSICSVASTCKTFNSCTSQILSFLPNFYLLDIAPSIELLRPLLPPNNPYLRTLKVDCTRLDDSSIDYLLRPSLHDLSLHNCADFSGKLLSEVGERCKDLRSLYLSSVADKRWRSICVSDLEQLLSGCTQLETLILMFDVSVFLRHNFARVWALASSKLTCLEIGYISSVMVTELLSPTVGPQHWPNQIQPPVLPSIQKLWLAVDYITDTMIGTISKNLASLTHLDLRDAPIIEPSVTFDLTNSGLQSINPQGKLKHLSLVRSQEFVATYFKRVNDLGVLLMADRCSNMESICLGGFCRVTDTGFKTILHSCASLYKFRVSHGSQLTDLVFHDMYATSLSLTHVSLRWCNLLTNLAFLRLASNRDLSVLDLRDCRNLG…	633	5027	https://onlinelibrary.wiley.com/doi/full/10.1111/pbi.13558
PlantKGA_431	Apiales	Araliaceae	Panax	notoginseng	Panax notoginseng		三七	chromosome	Yes	转录本	Pno12G005519t1	Pno12G005519t11288xxPlantKGA_431	Pno12G005519	L	partial	12	4344035	4345616	+	Pfam	PF13855	Leucine rich repeat	Leucine-rich repeat	127	187	SNLQTLTLRFNSFSGSVPASFSALKLLQSVDLSHNSLSGILPNTLNSLTSLSRLDLSFNKF	5.3e-10	MSTFFIFLLYLSLSSLIVFTATSSLTFPSDVAALQAFKASIKPTTVPSYSCLASWIFSSDPCSTPHINHFTCGLTCTDSRVTQLTLDPAGYSGTLSPLISQLTQLTHLDLSENNFFGPIPLSLSSLSNLQTLTLRFNSFSGSVPASFSALKLLQSVDLSHNSLSGILPNTLNSLTSLSRLDLSFNKFTGSIPKLPPNLVQLAIKNNYLSGFLLQTSFSESTRLDTVELSENSLVGVLQPWLFLLPSLQQVNLSKNKFTRVEIWRPRNLNSNLVAVDIGFNKLRGNLPINFPAYPMLSSLTLSYNRLNGSIPLGYSKKFKRLFLDGNFLNGSPPKGLFSGEAVVSGSLGDNCLQSCPVSSPLCVKSQKPTWICRRTYGKPRL	381	1582	https://onlinelibrary.wiley.com/doi/full/10.1111/pbi.13558
PlantKGA_431	Apiales	Araliaceae	Panax	notoginseng	Panax notoginseng		三七	chromosome	Yes	转录本	Pno12G005519t1	Pno12G005519t11288xxPlantKGA_431	Pno12G005519	L	partial	12	4344035	4345616	+	Pfam	PF00560	Leucine Rich Repeat	Leucine-rich repeat	104	126	QLTHLDLSENNFFGPIPLSLSSL	0.45	MSTFFIFLLYLSLSSLIVFTATSSLTFPSDVAALQAFKASIKPTTVPSYSCLASWIFSSDPCSTPHINHFTCGLTCTDSRVTQLTLDPAGYSGTLSPLISQLTQLTHLDLSENNFFGPIPLSLSSLSNLQTLTLRFNSFSGSVPASFSALKLLQSVDLSHNSLSGILPNTLNSLTSLSRLDLSFNKFTGSIPKLPPNLVQLAIKNNYLSGFLLQTSFSESTRLDTVELSENSLVGVLQPWLFLLPSLQQVNLSKNKFTRVEIWRPRNLNSNLVAVDIGFNKLRGNLPINFPAYPMLSSLTLSYNRLNGSIPLGYSKKFKRLFLDGNFLNGSPPKGLFSGEAVVSGSLGDNCLQSCPVSSPLCVKSQKPTWICRRTYGKPRL	381	1582	https://onlinelibrary.wiley.com/doi/full/10.1111/pbi.13558
PlantKGA_431	Apiales	Araliaceae	Panax	notoginseng	Panax notoginseng		三七	chromosome	Yes	转录本	Pno12G005519t1	Pno12G005519t11288xxPlantKGA_431	Pno12G005519	L	partial	12	4344035	4345616	+	Pfam	PF08263	Leucine rich repeat N-terminal domain	Leucine-rich repeat-containing N-terminal, plant-type	29	63	SDVAALQAFKASIKPTTVPSYSCLASWIFSSDPCS	2.7e-05	MSTFFIFLLYLSLSSLIVFTATSSLTFPSDVAALQAFKASIKPTTVPSYSCLASWIFSSDPCSTPHINHFTCGLTCTDSRVTQLTLDPAGYSGTLSPLISQLTQLTHLDLSENNFFGPIPLSLSSLSNLQTLTLRFNSFSGSVPASFSALKLLQSVDLSHNSLSGILPNTLNSLTSLSRLDLSFNKFTGSIPKLPPNLVQLAIKNNYLSGFLLQTSFSESTRLDTVELSENSLVGVLQPWLFLLPSLQQVNLSKNKFTRVEIWRPRNLNSNLVAVDIGFNKLRGNLPINFPAYPMLSSLTLSYNRLNGSIPLGYSKKFKRLFLDGNFLNGSPPKGLFSGEAVVSGSLGDNCLQSCPVSSPLCVKSQKPTWICRRTYGKPRL	381	1582	https://onlinelibrary.wiley.com/doi/full/10.1111/pbi.13558
PlantKGA_431	Apiales	Araliaceae	Panax	notoginseng	Panax notoginseng		三七	chromosome	Yes	转录本	Pno12G006570t1	Pno12G006570t11288xxPlantKGA_431	Pno12G006570	L	partial	12	4932470	4933890	+	Pfam	PF08263	Leucine rich repeat N-terminal domain	Leucine-rich repeat-containing N-terminal, plant-type	24	60	NSEGNALHALRSKLSDPTNVLQSWDPTLVNPCTWFHV	2.3e-07	MVFTSLPSLIFTILLSLPFTLCTNSEGNALHALRSKLSDPTNVLQSWDPTLVNPCTWFHVPVIPTTMDLGNSNISGSLGPELGQLEHLRYLELYRNNIVGKIPKELGNLKNLVSMDLYGNKFEGKIPKSFAKLKSLRFLRLNDNKLSGPIPRELVTLADLIVFEVSNNNLCGTIPVDGPFGSLPMERYHFYYLSST	196	1421	https://onlinelibrary.wiley.com/doi/full/10.1111/pbi.13558
PlantKGA_431	Apiales	Araliaceae	Panax	notoginseng	Panax notoginseng		三七	chromosome	Yes	转录本	Pno12G006570t1	Pno12G006570t11288xxPlantKGA_431	Pno12G006570	L	partial	12	4932470	4933890	+	Pfam	PF13855	Leucine rich repeat	Leucine-rich repeat	107	146	GNLKNLVSMDLYGNKFEGKIPKSFAKLKSLRFLRLNDNKL	2e-06	MVFTSLPSLIFTILLSLPFTLCTNSEGNALHALRSKLSDPTNVLQSWDPTLVNPCTWFHVPVIPTTMDLGNSNISGSLGPELGQLEHLRYLELYRNNIVGKIPKELGNLKNLVSMDLYGNKFEGKIPKSFAKLKSLRFLRLNDNKLSGPIPRELVTLADLIVFEVSNNNLCGTIPVDGPFGSLPMERYHFYYLSST	196	1421	https://onlinelibrary.wiley.com/doi/full/10.1111/pbi.13558
PlantKGA_431	Apiales	Araliaceae	Panax	notoginseng	Panax notoginseng		三七	chromosome	Yes	转录本	Pno12G006614t1	Pno12G006614t11288xxPlantKGA_431	Pno12G006614	L	partial	12	4966838	4974936	+	Pfam	PF13855	Leucine rich repeat	Leucine-rich repeat	91	150	HLRYLELYRNNIVGKIPKELGNLKNLVSMDLYGNKFEGKIPKSFAKLKSLRFLRLNDNKL	2.3e-08	MVFTSLPSLIFTILLSLPFKLCTNSEGNALHALRSKLSDPTNVLQSWDPTLVNPCTWFHVTCDSNNHVIRLDLGNSNISGSLGPELGQLEHLRYLELYRNNIVGKIPKELGNLKNLVSMDLYGNKFEGKIPKSFAKLKSLRFLRLNDNKLSGPIPRELVTLADLIVFEVSNNNLCGTIPVDGPFGSLPMERKAKELDFSVPTSILSSPFSSTASSVTKIGVVGWYLGMIKSRPILTKSITSALIYTVADFSSQKIARPSSEPYDLVRTLRMAGYGMLILGPSLHFWFNFVSKVLPKRDLFTTMAKIVMGQTLYGPTMTVVFFSVNAGLQGENGKEIFARLKRDLVPTMISGVMYWPLCDFITFKFIPVQLQPLVSNSFSYLWTVYITYMASLEKADVI	398	8099	https://onlinelibrary.wiley.com/doi/full/10.1111/pbi.13558
PlantKGA_431	Apiales	Araliaceae	Panax	notoginseng	Panax notoginseng		三七	chromosome	Yes	转录本	Pno12G006614t1	Pno12G006614t11288xxPlantKGA_431	Pno12G006614	L	partial	12	4966838	4974936	+	Pfam	PF08263	Leucine rich repeat N-terminal domain	Leucine-rich repeat-containing N-terminal, plant-type	24	63	NSEGNALHALRSKLSDPTNVLQSWDPTLVNPCTWFHVTCD	8.1e-10	MVFTSLPSLIFTILLSLPFKLCTNSEGNALHALRSKLSDPTNVLQSWDPTLVNPCTWFHVTCDSNNHVIRLDLGNSNISGSLGPELGQLEHLRYLELYRNNIVGKIPKELGNLKNLVSMDLYGNKFEGKIPKSFAKLKSLRFLRLNDNKLSGPIPRELVTLADLIVFEVSNNNLCGTIPVDGPFGSLPMERKAKELDFSVPTSILSSPFSSTASSVTKIGVVGWYLGMIKSRPILTKSITSALIYTVADFSSQKIARPSSEPYDLVRTLRMAGYGMLILGPSLHFWFNFVSKVLPKRDLFTTMAKIVMGQTLYGPTMTVVFFSVNAGLQGENGKEIFARLKRDLVPTMISGVMYWPLCDFITFKFIPVQLQPLVSNSFSYLWTVYITYMASLEKADVI	398	8099	https://onlinelibrary.wiley.com/doi/full/10.1111/pbi.13558
PlantKGA_431	Apiales	Araliaceae	Panax	notoginseng	Panax notoginseng		三七	chromosome	Yes	转录本	Pno13G000696t1	Pno13G000696t11288xxPlantKGA_431	Pno13G000696	L	partial	13	24934333	24935932	-	Pfam	PF13855	Leucine rich repeat	Leucine-rich repeat	130	188	LRILDLIGNQISGEIPADIGKLKQLTVLNLAYNAISGSVPASIVNLASLKHLDLSNNQI	1e-09	MGLTGLVTLVLLAVTLTVNACPPADKAVLLAFKAALSEPYLGIFNSWTGNDCCNQWYGVSCDPTTSRVSDISLRGESEDPILEKAGRSGYMTGSISPSVCSLDRLSTLVVADWKGISGKIPACLSSLTDLRILDLIGNQISGEIPADIGKLKQLTVLNLAYNAISGSVPASIVNLASLKHLDLSNNQISGELPADLGKLKMMSRALLSRNQLTGSIPSSLSDIHRLADLDLSMNRITGSIPSQLGSMPVLSTLNLDSNQLSGEIPASLLSNTGLNILNLSRNSLEGFLSDVFHLKTYFLTIDLSFNKLKGLIPHTISSAMYIGHLDLSHNNLCGLIPEGLPLDRIDATSFEDNDCL	356	1600	https://onlinelibrary.wiley.com/doi/full/10.1111/pbi.13558
PlantKGA_431	Apiales	Araliaceae	Panax	notoginseng	Panax notoginseng		三七	chromosome	Yes	转录本	Pno13G000696t1	Pno13G000696t11288xxPlantKGA_431	Pno13G000696	L	partial	13	24934333	24935932	-	Pfam	PF08263	Leucine rich repeat N-terminal domain	Leucine-rich repeat-containing N-terminal, plant-type	23	62	PADKAVLLAFKAALSEPYLGIFNSWTGNDCCNQWYGVSCD	1.1e-09	MGLTGLVTLVLLAVTLTVNACPPADKAVLLAFKAALSEPYLGIFNSWTGNDCCNQWYGVSCDPTTSRVSDISLRGESEDPILEKAGRSGYMTGSISPSVCSLDRLSTLVVADWKGISGKIPACLSSLTDLRILDLIGNQISGEIPADIGKLKQLTVLNLAYNAISGSVPASIVNLASLKHLDLSNNQISGELPADLGKLKMMSRALLSRNQLTGSIPSSLSDIHRLADLDLSMNRITGSIPSQLGSMPVLSTLNLDSNQLSGEIPASLLSNTGLNILNLSRNSLEGFLSDVFHLKTYFLTIDLSFNKLKGLIPHTISSAMYIGHLDLSHNNLCGLIPEGLPLDRIDATSFEDNDCL	356	1600	https://onlinelibrary.wiley.com/doi/full/10.1111/pbi.13558
PlantKGA_431	Apiales	Araliaceae	Panax	notoginseng	Panax notoginseng		三七	chromosome	Yes	转录本	Pno13G000775t1	Pno13G000775t11288xxPlantKGA_431	Pno13G000775	L	partial	13	26432183	26433888	-	Pfam	PF08263	Leucine rich repeat N-terminal domain	Leucine-rich repeat-containing N-terminal, plant-type	22	52	PDDISAILAFKYSFSNSDLLPSWTPDMNCCY	0.0003	MLLLLFLILLFPGLSPADPCHPDDISAILAFKYSFSNSDLLPSWTPDMNCCYIFGCSQGNRVSEFTITNSDLSGSIKPDALAGLTYLKTLRLHKMPFLVGEIPRGIQNLTHLTYLDISWTNISGQVPQNLVNLKNLMIINFSFNKLSGSIPPSLPLLPSIFAIDLSRNQLTGSIPESYGHFPKTINFPNLLLSHNKLSGKLPASLGSMNFSRIDLSRNNLSGDASILFGATKICQVLDISRNNFEFDFSRVEFMDESLVLLDISHNKIYGKIPQLITEAFMLQGLNFSYNRLCGEIPKGWKLRYRPEGFDNSSFSHNRCLCGAPLDPCKP	330	1706	https://onlinelibrary.wiley.com/doi/full/10.1111/pbi.13558
PlantKGA_431	Apiales	Araliaceae	Panax	notoginseng	Panax notoginseng		三七	chromosome	Yes	转录本	Pno13G000777t1	Pno13G000777t11288xxPlantKGA_431	Pno13G000777	L	partial	13	26455476	26455793	-	Pfam	PF00560	Leucine Rich Repeat	Leucine-rich repeat	32	49	SLQILDISHNKIYGKIPQ	1.7	MLFGATKGCQVLDISRNIIEFDFSRVEFMDESLQILDISHNKIYGKIPQLITEASMLQGLNFSYNRLCGEIPNGWKLRYRPEGFDNSSFSHNRCLCGAPLDPCKF	105	318	https://onlinelibrary.wiley.com/doi/full/10.1111/pbi.13558
PlantKGA_431	Apiales	Araliaceae	Panax	notoginseng	Panax notoginseng		三七	chromosome	Yes	转录本	Pno14G000231t1	Pno14G000231t11288xxPlantKGA_431	Pno14G000231	L	partial	14	1551432	1553725	+	Pfam	PF13516	Leucine Rich repeat	Leucine-rich repeat	143	167	KCPNLTRLKLRGCRELTDLGMTAFA	0.018	MGQSSSTHGFNPCSSHRHTAPAYQRNTSRSEVFSVMQSNHDYSDADGLIGNRDLISELPDECLALIFQSLCSGDRKRCSLVCQRWLRVEGQSRHRLALNAQADLLSVVPDLFSRFDSVTKLALRCDRRSKSVNDDALTLISLKCPNLTRLKLRGCRELTDLGMTAFAKNSKCLKKFSCGSCMFGAKGMNAVLDHCSSLEELSVKRLRGINDGGAAEPIGPGVAASSLKSICLKELYNGQCFGPLIIGSKNLKSLKLLRCLGDWDRLLETVASGKNNLVEIHLERLQVSDVGLSAISNCPELENLHIVKTPECTNAGIVSVAEHCKLLRKLHIDGWRTNRIGDEGLIAIAKHSAKLQELVLIGVNPSSLSLEAIASNCQKLERLALCGSETIADAEISCI…	548	2294	https://onlinelibrary.wiley.com/doi/full/10.1111/pbi.13558
PlantKGA_431	Apiales	Araliaceae	Panax	notoginseng	Panax notoginseng		三七	chromosome	Yes	转录本	Pno14G000231t1	Pno14G000231t11288xxPlantKGA_431	Pno14G000231	L	partial	14	1551432	1553725	+	Pfam	PF13516	Leucine Rich repeat	Leucine-rich repeat	338	349	NRIGDEGLIAIA	0.96	MGQSSSTHGFNPCSSHRHTAPAYQRNTSRSEVFSVMQSNHDYSDADGLIGNRDLISELPDECLALIFQSLCSGDRKRCSLVCQRWLRVEGQSRHRLALNAQADLLSVVPDLFSRFDSVTKLALRCDRRSKSVNDDALTLISLKCPNLTRLKLRGCRELTDLGMTAFAKNSKCLKKFSCGSCMFGAKGMNAVLDHCSSLEELSVKRLRGINDGGAAEPIGPGVAASSLKSICLKELYNGQCFGPLIIGSKNLKSLKLLRCLGDWDRLLETVASGKNNLVEIHLERLQVSDVGLSAISNCPELENLHIVKTPECTNAGIVSVAEHCKLLRKLHIDGWRTNRIGDEGLIAIAKHSAKLQELVLIGVNPSSLSLEAIASNCQKLERLALCGSETIADAEISCI…	548	2294	https://onlinelibrary.wiley.com/doi/full/10.1111/pbi.13558
PlantKGA_431	Apiales	Araliaceae	Panax	notoginseng	Panax notoginseng		三七	chromosome	Yes	转录本	Pno14G001736t1	Pno14G001736t11288xxPlantKGA_431	Pno14G001736	L	partial	14	7999982	8001828	-	Pfam	PF08263	Leucine rich repeat N-terminal domain	Leucine-rich repeat-containing N-terminal, plant-type	29	71	NSDLSALYEIKNTLTDIPSSSPFFSTWNFKSPDPCSSFAGITC	2.5e-08	MGLLLLFQLLIFFSNPTTTIQQNSPIISNSDLSALYEIKNTLTDIPSSSPFFSTWNFKSPDPCSSFAGITCTAVNSGRRRITSLTLGTGLSDSRGLAGSLPASLSNLTELTQLILFPGVVTGPIPPQVGSLKNLRVISLTNNRLTGPIPTTISSLSNLHTLDLSYNQLTGSVPPNIKTGLPKLKVLVLSSNRLAGHLPELPTQLLHLDLKNNGISGILPVQMPLTLRYFSLSINKMWGPLNGLDSLSELVYLDLSMNKFSGPIPASLFRPSLSSMFLQRNNLSRGVPSLSSPPSYGPGSIVDLSHNILTGELSTVLIGAESIYLNNNRLMGKVPEEYVVSVNSGSTKTLYLQHNYISGFPKPGSATPDSASVCLNYNCMVPPVWLTACPASSGGQLSRP…	414	1847	https://onlinelibrary.wiley.com/doi/full/10.1111/pbi.13558
PlantKGA_431	Apiales	Araliaceae	Panax	notoginseng	Panax notoginseng		三七	chromosome	Yes	转录本	Pno14G001736t1	Pno14G001736t11288xxPlantKGA_431	Pno14G001736	L	partial	14	7999982	8001828	-	Pfam	PF13855	Leucine rich repeat	Leucine-rich repeat	133	193	NLRVISLTNNRLTGPIPTTISSLSNLHTLDLSYNQLTGSVPPNIKTGLPKLKVLVLSSNRL	2.7e-11	MGLLLLFQLLIFFSNPTTTIQQNSPIISNSDLSALYEIKNTLTDIPSSSPFFSTWNFKSPDPCSSFAGITCTAVNSGRRRITSLTLGTGLSDSRGLAGSLPASLSNLTELTQLILFPGVVTGPIPPQVGSLKNLRVISLTNNRLTGPIPTTISSLSNLHTLDLSYNQLTGSVPPNIKTGLPKLKVLVLSSNRLAGHLPELPTQLLHLDLKNNGISGILPVQMPLTLRYFSLSINKMWGPLNGLDSLSELVYLDLSMNKFSGPIPASLFRPSLSSMFLQRNNLSRGVPSLSSPPSYGPGSIVDLSHNILTGELSTVLIGAESIYLNNNRLMGKVPEEYVVSVNSGSTKTLYLQHNYISGFPKPGSATPDSASVCLNYNCMVPPVWLTACPASSGGQLSRP…	414	1847	https://onlinelibrary.wiley.com/doi/full/10.1111/pbi.13558
PlantKGA_431	Apiales	Araliaceae	Panax	notoginseng	Panax notoginseng		三七	chromosome	Yes	转录本	Pno16G000004t1	Pno16G000004t11288xxPlantKGA_431	Pno16G000004	L	partial	16	10016089	10019972	+	Pfam	PF13516	Leucine Rich repeat	Leucine-rich repeat	389	410	PSLKVLEMAGNDITAEAASSLA	0.036	MEQLCSMDATAENAQRQPFSIKLWPPSQNTRIVLVERMTKNLSSPTVFTEKYGSLSKEEAAENAKEIEDAAFVTANEHYEKAPDGDGSSAVQHYARECSRLVLEVLKKGSGPKDKKVLKSEVVTTPIGTFFDISKGQRNFIESEEAQELLRPLKEPGNSYSKICFSNRSFGLGAAYVAEPILASLKDQLKEVDLSDIIAGRPEPEALDVMKIFSKALEGCVLKSLNLSNNALGEKGVRAFGTLLQSQNYLEELYLMNDGISEEAAKAVCELIPSTEKLRILQFHNNMTGDEGAIAISEVVKRSPLLQDFRCSSTRVGCDGGISLSEALGTCADMKKLDLRDNMFGVEAGVALSKSLSRHANLTELYLSYLNLENEGAISIADVLKEAVPSLKVLEMAGN…	547	3884	https://onlinelibrary.wiley.com/doi/full/10.1111/pbi.13558
PlantKGA_431	Apiales	Araliaceae	Panax	notoginseng	Panax notoginseng		三七	chromosome	Yes	转录本	Pno16G000004t1	Pno16G000004t11288xxPlantKGA_431	Pno16G000004	L	partial	16	10016089	10019972	+	Pfam	PF13516	Leucine Rich repeat	Leucine-rich repeat	222	240	LKSLNLSNNALGEKGVRAF	0.12	MEQLCSMDATAENAQRQPFSIKLWPPSQNTRIVLVERMTKNLSSPTVFTEKYGSLSKEEAAENAKEIEDAAFVTANEHYEKAPDGDGSSAVQHYARECSRLVLEVLKKGSGPKDKKVLKSEVVTTPIGTFFDISKGQRNFIESEEAQELLRPLKEPGNSYSKICFSNRSFGLGAAYVAEPILASLKDQLKEVDLSDIIAGRPEPEALDVMKIFSKALEGCVLKSLNLSNNALGEKGVRAFGTLLQSQNYLEELYLMNDGISEEAAKAVCELIPSTEKLRILQFHNNMTGDEGAIAISEVVKRSPLLQDFRCSSTRVGCDGGISLSEALGTCADMKKLDLRDNMFGVEAGVALSKSLSRHANLTELYLSYLNLENEGAISIADVLKEAVPSLKVLEMAGN…	547	3884	https://onlinelibrary.wiley.com/doi/full/10.1111/pbi.13558
PlantKGA_431	Apiales	Araliaceae	Panax	notoginseng	Panax notoginseng		三七	chromosome	Yes	转录本	Pno16G000004t1	Pno16G000004t11288xxPlantKGA_431	Pno16G000004	L	partial	16	10016089	10019972	+	Pfam	PF13516	Leucine Rich repeat	Leucine-rich repeat	416	438	KQHLTKLNLSENELKDGGIIPIS	0.003	MEQLCSMDATAENAQRQPFSIKLWPPSQNTRIVLVERMTKNLSSPTVFTEKYGSLSKEEAAENAKEIEDAAFVTANEHYEKAPDGDGSSAVQHYARECSRLVLEVLKKGSGPKDKKVLKSEVVTTPIGTFFDISKGQRNFIESEEAQELLRPLKEPGNSYSKICFSNRSFGLGAAYVAEPILASLKDQLKEVDLSDIIAGRPEPEALDVMKIFSKALEGCVLKSLNLSNNALGEKGVRAFGTLLQSQNYLEELYLMNDGISEEAAKAVCELIPSTEKLRILQFHNNMTGDEGAIAISEVVKRSPLLQDFRCSSTRVGCDGGISLSEALGTCADMKKLDLRDNMFGVEAGVALSKSLSRHANLTELYLSYLNLENEGAISIADVLKEAVPSLKVLEMAGN…	547	3884	https://onlinelibrary.wiley.com/doi/full/10.1111/pbi.13558
PlantKGA_431	Apiales	Araliaceae	Panax	notoginseng	Panax notoginseng		三七	chromosome	Yes	转录本	Pno16G000004t1	Pno16G000004t11288xxPlantKGA_431	Pno16G000004	L	partial	16	10016089	10019972	+	Pfam	PF13516	Leucine Rich repeat	Leucine-rich repeat	360	381	ANLTELYLSYLNLENEGAISIA	0.056	MEQLCSMDATAENAQRQPFSIKLWPPSQNTRIVLVERMTKNLSSPTVFTEKYGSLSKEEAAENAKEIEDAAFVTANEHYEKAPDGDGSSAVQHYARECSRLVLEVLKKGSGPKDKKVLKSEVVTTPIGTFFDISKGQRNFIESEEAQELLRPLKEPGNSYSKICFSNRSFGLGAAYVAEPILASLKDQLKEVDLSDIIAGRPEPEALDVMKIFSKALEGCVLKSLNLSNNALGEKGVRAFGTLLQSQNYLEELYLMNDGISEEAAKAVCELIPSTEKLRILQFHNNMTGDEGAIAISEVVKRSPLLQDFRCSSTRVGCDGGISLSEALGTCADMKKLDLRDNMFGVEAGVALSKSLSRHANLTELYLSYLNLENEGAISIADVLKEAVPSLKVLEMAGN…	547	3884	https://onlinelibrary.wiley.com/doi/full/10.1111/pbi.13558
PlantKGA_431	Apiales	Araliaceae	Panax	notoginseng	Panax notoginseng		三七	chromosome	Yes	转录本	Pno16G000087t1	Pno16G000087t11288xxPlantKGA_431	Pno16G000087	L	partial	16	11284938	11297011	+	Pfam	PF13516	Leucine Rich repeat	Leucine-rich repeat	185	208	CKNLEDLNLRFCEGLTDAGLVELA	0.016	MRGRDKINPILPDELILEIFKHLSSKSNRDACSLVCKRWSRLERLSRETVRIAASGSPDALVELLASRFVNVRNLYIDERLTISLPVEFARRRGDDALSSVRLHYMSDRSGTGDGETESYCFSDAGLAAVGGCFTKIEKLSLIWCSNATSAGLRSMAEKCKSLKSLDLQGCYVGDQGLVAIGEYCKNLEDLNLRFCEGLTDAGLVELAIGCGRTLKSLGVAACAKITDVSLEAVGSNCRSLETVSLDSEFIYNKGLLAVAKGCPELKVLKLQCINVTDEALQAVGLFCLSLELLSLYSFQRFTDKSLRAIGKGCKKLKNLTISDCYFLSDKGLEAVAVGCMELTHLEVNGCHNIGTLGLESIGRSCTRLSELALLYCQKIGNALTEVGRGCKYLQALHL…	586	12074	https://onlinelibrary.wiley.com/doi/full/10.1111/pbi.13558
PlantKGA_431	Apiales	Araliaceae	Panax	notoginseng	Panax notoginseng		三七	chromosome	Yes	转录本	Pno16G000087t1	Pno16G000087t11288xxPlantKGA_431	Pno16G000087	L	partial	16	11284938	11297011	+	Pfam	PF13516	Leucine Rich repeat	Leucine-rich repeat	469	491	CSLHHLNVSGCHQIGDAGIIAVA	0.0036	MRGRDKINPILPDELILEIFKHLSSKSNRDACSLVCKRWSRLERLSRETVRIAASGSPDALVELLASRFVNVRNLYIDERLTISLPVEFARRRGDDALSSVRLHYMSDRSGTGDGETESYCFSDAGLAAVGGCFTKIEKLSLIWCSNATSAGLRSMAEKCKSLKSLDLQGCYVGDQGLVAIGEYCKNLEDLNLRFCEGLTDAGLVELAIGCGRTLKSLGVAACAKITDVSLEAVGSNCRSLETVSLDSEFIYNKGLLAVAKGCPELKVLKLQCINVTDEALQAVGLFCLSLELLSLYSFQRFTDKSLRAIGKGCKKLKNLTISDCYFLSDKGLEAVAVGCMELTHLEVNGCHNIGTLGLESIGRSCTRLSELALLYCQKIGNALTEVGRGCKYLQALHL…	586	12074	https://onlinelibrary.wiley.com/doi/full/10.1111/pbi.13558
PlantKGA_431	Apiales	Araliaceae	Panax	notoginseng	Panax notoginseng		三七	chromosome	Yes	转录本	Pno16G000087t1	Pno16G000087t11288xxPlantKGA_431	Pno16G000087	L	partial	16	11284938	11297011	+	Pfam	PF13516	Leucine Rich repeat	Leucine-rich repeat	417	439	CRHLKKLHIRRCYEVGNKGIIAV	0.95	MRGRDKINPILPDELILEIFKHLSSKSNRDACSLVCKRWSRLERLSRETVRIAASGSPDALVELLASRFVNVRNLYIDERLTISLPVEFARRRGDDALSSVRLHYMSDRSGTGDGETESYCFSDAGLAAVGGCFTKIEKLSLIWCSNATSAGLRSMAEKCKSLKSLDLQGCYVGDQGLVAIGEYCKNLEDLNLRFCEGLTDAGLVELAIGCGRTLKSLGVAACAKITDVSLEAVGSNCRSLETVSLDSEFIYNKGLLAVAKGCPELKVLKLQCINVTDEALQAVGLFCLSLELLSLYSFQRFTDKSLRAIGKGCKKLKNLTISDCYFLSDKGLEAVAVGCMELTHLEVNGCHNIGTLGLESIGRSCTRLSELALLYCQKIGNALTEVGRGCKYLQALHL…	586	12074	https://onlinelibrary.wiley.com/doi/full/10.1111/pbi.13558
PlantKGA_431	Apiales	Araliaceae	Panax	notoginseng	Panax notoginseng		三七	chromosome	Yes	转录本	Pno16G000087t1	Pno16G000087t11288xxPlantKGA_431	Pno16G000087	L	partial	16	11284938	11297011	+	Pfam	PF13516	Leucine Rich repeat	Leucine-rich repeat	159	181	KCKSLKSLDLQGCYVGDQGLVAI	0.0046	MRGRDKINPILPDELILEIFKHLSSKSNRDACSLVCKRWSRLERLSRETVRIAASGSPDALVELLASRFVNVRNLYIDERLTISLPVEFARRRGDDALSSVRLHYMSDRSGTGDGETESYCFSDAGLAAVGGCFTKIEKLSLIWCSNATSAGLRSMAEKCKSLKSLDLQGCYVGDQGLVAIGEYCKNLEDLNLRFCEGLTDAGLVELAIGCGRTLKSLGVAACAKITDVSLEAVGSNCRSLETVSLDSEFIYNKGLLAVAKGCPELKVLKLQCINVTDEALQAVGLFCLSLELLSLYSFQRFTDKSLRAIGKGCKKLKNLTISDCYFLSDKGLEAVAVGCMELTHLEVNGCHNIGTLGLESIGRSCTRLSELALLYCQKIGNALTEVGRGCKYLQALHL…	586	12074	https://onlinelibrary.wiley.com/doi/full/10.1111/pbi.13558
PlantKGA_431	Apiales	Araliaceae	Panax	notoginseng	Panax notoginseng		三七	chromosome	Yes	转录本	Pno16G000087t1	Pno16G000087t11288xxPlantKGA_431	Pno16G000087	L	partial	16	11284938	11297011	+	Pfam	PF13516	Leucine Rich repeat	Leucine-rich repeat	340	362	CMELTHLEVNGCHNIGTLGLESI	0.68	MRGRDKINPILPDELILEIFKHLSSKSNRDACSLVCKRWSRLERLSRETVRIAASGSPDALVELLASRFVNVRNLYIDERLTISLPVEFARRRGDDALSSVRLHYMSDRSGTGDGETESYCFSDAGLAAVGGCFTKIEKLSLIWCSNATSAGLRSMAEKCKSLKSLDLQGCYVGDQGLVAIGEYCKNLEDLNLRFCEGLTDAGLVELAIGCGRTLKSLGVAACAKITDVSLEAVGSNCRSLETVSLDSEFIYNKGLLAVAKGCPELKVLKLQCINVTDEALQAVGLFCLSLELLSLYSFQRFTDKSLRAIGKGCKKLKNLTISDCYFLSDKGLEAVAVGCMELTHLEVNGCHNIGTLGLESIGRSCTRLSELALLYCQKIGNALTEVGRGCKYLQALHL…	586	12074	https://onlinelibrary.wiley.com/doi/full/10.1111/pbi.13558
PlantKGA_431	Apiales	Araliaceae	Panax	notoginseng	Panax notoginseng		三七	chromosome	Yes	转录本	Pno16G000087t1	Pno16G000087t11288xxPlantKGA_431	Pno16G000087	L	partial	16	11284938	11297011	+	Pfam	PF13516	Leucine Rich repeat	Leucine-rich repeat	443	465	CKFLTDLSLRFCDRVGDDALIAI	0.33	MRGRDKINPILPDELILEIFKHLSSKSNRDACSLVCKRWSRLERLSRETVRIAASGSPDALVELLASRFVNVRNLYIDERLTISLPVEFARRRGDDALSSVRLHYMSDRSGTGDGETESYCFSDAGLAAVGGCFTKIEKLSLIWCSNATSAGLRSMAEKCKSLKSLDLQGCYVGDQGLVAIGEYCKNLEDLNLRFCEGLTDAGLVELAIGCGRTLKSLGVAACAKITDVSLEAVGSNCRSLETVSLDSEFIYNKGLLAVAKGCPELKVLKLQCINVTDEALQAVGLFCLSLELLSLYSFQRFTDKSLRAIGKGCKKLKNLTISDCYFLSDKGLEAVAVGCMELTHLEVNGCHNIGTLGLESIGRSCTRLSELALLYCQKIGNALTEVGRGCKYLQALHL…	586	12074	https://onlinelibrary.wiley.com/doi/full/10.1111/pbi.13558
PlantKGA_431	Apiales	Araliaceae	Panax	notoginseng	Panax notoginseng		三七	chromosome	Yes	转录本	Pno16G000516t1	Pno16G000516t11288xxPlantKGA_431	Pno16G000516	L	partial	16	16942545	16944074	+	Pfam	PF13516	Leucine Rich repeat	Leucine-rich repeat	93	114	TYLRSLNLQNCKGITDTGVATI	0.018	MNGTLRDDELRAVLGKLECQKDKEVFGLVCKRWLHLQSTERKKLCSRAGPHMLRKMATRFTRLRHLDLSQSVSRSYYPGVTDSDLSVIATSFTYLRSLNLQNCKGITDTGVATIGSGLSSLQFLDVSYCRKLTDKGLSEVTGGCPGLKSLHLAGCRFVTDALLGALSINCHDLEELDINKCSNVGDIGISRISKACTASLKTLKLLDCYKLGDESILSLAKFCKNLETLIIGGCRNISDESIKSLAAACNVNLKILRMDWCLNVSDSSLNCILSQCRSLEVLDIGCCEEVTDAAFQGLDSEGFELALKILKVSNCTNITVAGIGMLLKSCKTLQYLDVRSCPHVTKAGCDEAGLHFPTFCKVNFAGSLAEPDVLI	375	1530	https://onlinelibrary.wiley.com/doi/full/10.1111/pbi.13558
PlantKGA_431	Apiales	Araliaceae	Panax	notoginseng	Panax notoginseng		三七	chromosome	Yes	转录本	Pno16G000516t1	Pno16G000516t11288xxPlantKGA_431	Pno16G000516	L	partial	16	16942545	16944074	+	Pfam	PF13516	Leucine Rich repeat	Leucine-rich repeat	119	138	SSLQFLDVSYCRKLTDKGLS	0.11	MNGTLRDDELRAVLGKLECQKDKEVFGLVCKRWLHLQSTERKKLCSRAGPHMLRKMATRFTRLRHLDLSQSVSRSYYPGVTDSDLSVIATSFTYLRSLNLQNCKGITDTGVATIGSGLSSLQFLDVSYCRKLTDKGLSEVTGGCPGLKSLHLAGCRFVTDALLGALSINCHDLEELDINKCSNVGDIGISRISKACTASLKTLKLLDCYKLGDESILSLAKFCKNLETLIIGGCRNISDESIKSLAAACNVNLKILRMDWCLNVSDSSLNCILSQCRSLEVLDIGCCEEVTDAAFQGLDSEGFELALKILKVSNCTNITVAGIGMLLKSCKTLQYLDVRSCPHVTKAGCDEAGLHFPTFCKVNFAGSLAEPDVLI	375	1530	https://onlinelibrary.wiley.com/doi/full/10.1111/pbi.13558
PlantKGA_431	Apiales	Araliaceae	Panax	notoginseng	Panax notoginseng		三七	chromosome	Yes	转录本	Pno16G000516t1	Pno16G000516t11288xxPlantKGA_431	Pno16G000516	L	partial	16	16942545	16944074	+	Pfam	PF13516	Leucine Rich repeat	Leucine-rich repeat	223	246	CKNLETLIIGGCRNISDESIKSLA	0.37	MNGTLRDDELRAVLGKLECQKDKEVFGLVCKRWLHLQSTERKKLCSRAGPHMLRKMATRFTRLRHLDLSQSVSRSYYPGVTDSDLSVIATSFTYLRSLNLQNCKGITDTGVATIGSGLSSLQFLDVSYCRKLTDKGLSEVTGGCPGLKSLHLAGCRFVTDALLGALSINCHDLEELDINKCSNVGDIGISRISKACTASLKTLKLLDCYKLGDESILSLAKFCKNLETLIIGGCRNISDESIKSLAAACNVNLKILRMDWCLNVSDSSLNCILSQCRSLEVLDIGCCEEVTDAAFQGLDSEGFELALKILKVSNCTNITVAGIGMLLKSCKTLQYLDVRSCPHVTKAGCDEAGLHFPTFCKVNFAGSLAEPDVLI	375	1530	https://onlinelibrary.wiley.com/doi/full/10.1111/pbi.13558
PlantKGA_431	Apiales	Araliaceae	Panax	notoginseng	Panax notoginseng		三七	chromosome	Yes	转录本	Pno16G000516t1	Pno16G000516t11288xxPlantKGA_431	Pno16G000516	L	partial	16	16942545	16944074	+	Pfam	PF13516	Leucine Rich repeat	Leucine-rich repeat	275	292	QCRSLEVLDIGCCEEVTD	1.6	MNGTLRDDELRAVLGKLECQKDKEVFGLVCKRWLHLQSTERKKLCSRAGPHMLRKMATRFTRLRHLDLSQSVSRSYYPGVTDSDLSVIATSFTYLRSLNLQNCKGITDTGVATIGSGLSSLQFLDVSYCRKLTDKGLSEVTGGCPGLKSLHLAGCRFVTDALLGALSINCHDLEELDINKCSNVGDIGISRISKACTASLKTLKLLDCYKLGDESILSLAKFCKNLETLIIGGCRNISDESIKSLAAACNVNLKILRMDWCLNVSDSSLNCILSQCRSLEVLDIGCCEEVTDAAFQGLDSEGFELALKILKVSNCTNITVAGIGMLLKSCKTLQYLDVRSCPHVTKAGCDEAGLHFPTFCKVNFAGSLAEPDVLI	375	1530	https://onlinelibrary.wiley.com/doi/full/10.1111/pbi.13558
PlantKGA_431	Apiales	Araliaceae	Panax	notoginseng	Panax notoginseng		三七	chromosome	Yes	转录本	Pno16G000945t1	Pno16G000945t11288xxPlantKGA_431	Pno16G000945	L	partial	16	22257431	22260519	+	Pfam	PF13855	Leucine rich repeat	Leucine-rich repeat	195	254	NLKRLVLCGNLFTGEVPVNFGGLSELLIMDLSRNSLSGNLPNTLGGLSSLLKLDLSNNKL	2.4e-09	MNNFIKTSYVTSTVIFILYLSAFLCNGEEVETVGAPMEKREKEALYSAIQGFVGKWWNGSDLYPDPCGWTPIQGVSCDMFDDYWYVTTLNIGLIHDNSLGCASNMEFRPQLFALTHLKTLSFVNCMVHKRHPITIPIQNWGALGGSLESLEFRSNPSLIGQIPTTFGGLTKLQSLVLLENGLSGELPTNIGNLINLKRLVLCGNLFTGEVPVNFGGLSELLIMDLSRNSLSGNLPNTLGGLSSLLKLDLSNNKLVGNIPNEIGNMKNLTLLDLSNNKFLGGLTKSLQELSSLEELVLSNNPICGGLMRLEWHNLQGLIILDLSNMGLTGGVPESMAELKGLRFLGLNDNNLTGDLSPKLAALPNVGAIYVNGNNLSGELKFSELFYGKMGSRFGAWDNP…	481	3089	https://onlinelibrary.wiley.com/doi/full/10.1111/pbi.13558
PlantKGA_431	Apiales	Araliaceae	Panax	notoginseng	Panax notoginseng		三七	chromosome	Yes	转录本	Pno16G001063t1	Pno16G001063t11288xxPlantKGA_431	Pno16G001063	L	partial	16	23735924	23742892	+	Pfam	PF00560	Leucine Rich Repeat	Leucine-rich repeat	198	210	NLQHLDVGNNHLV	1.2	MARQSPLLEFTPLLILPLLLIGLVNCKTLKRDVKALNEIKASLGWRVVYSWVGDDPCGDGDLPPWSGVTCTTQGDYRVVTVLEVYAVSIVGPFPTAVTNLLDLTRLDLHNNKLIGPIPPQIGRLKRLKILNLRWNKLQDVIPPETGELKRLTHLYLSFNNFKGEIPKELANLPELRYLHLHENRFIGRIPPELGTLQNLQHLDVGNNHLVGTIRELIRIEGCFPVLRNLYLNNNYLTGGIPAQLANLTNLEILYLSFNKMSGIIPPGLVHIPRLTYLYLDHNQFSGRIPDAFYKHPFLKELYIEANAFRPGVNPIGVHQVLEVSDTDFLF	330	6969	https://onlinelibrary.wiley.com/doi/full/10.1111/pbi.13558
PlantKGA_431	Apiales	Araliaceae	Panax	notoginseng	Panax notoginseng		三七	chromosome	Yes	转录本	Pno16G001063t1	Pno16G001063t11288xxPlantKGA_431	Pno16G001063	L	partial	16	23735924	23742892	+	Pfam	PF08263	Leucine rich repeat N-terminal domain	Leucine-rich repeat-containing N-terminal, plant-type	30	70	KRDVKALNEIKASLGWRVVYSWVGDDPCGDGDLPPWSGVTC	0.00019	MARQSPLLEFTPLLILPLLLIGLVNCKTLKRDVKALNEIKASLGWRVVYSWVGDDPCGDGDLPPWSGVTCTTQGDYRVVTVLEVYAVSIVGPFPTAVTNLLDLTRLDLHNNKLIGPIPPQIGRLKRLKILNLRWNKLQDVIPPETGELKRLTHLYLSFNNFKGEIPKELANLPELRYLHLHENRFIGRIPPELGTLQNLQHLDVGNNHLVGTIRELIRIEGCFPVLRNLYLNNNYLTGGIPAQLANLTNLEILYLSFNKMSGIIPPGLVHIPRLTYLYLDHNQFSGRIPDAFYKHPFLKELYIEANAFRPGVNPIGVHQVLEVSDTDFLF	330	6969	https://onlinelibrary.wiley.com/doi/full/10.1111/pbi.13558
PlantKGA_431	Apiales	Araliaceae	Panax	notoginseng	Panax notoginseng		三七	chromosome	Yes	转录本	Pno16G001063t1	Pno16G001063t11288xxPlantKGA_431	Pno16G001063	L	partial	16	23735924	23742892	+	Pfam	PF13855	Leucine rich repeat	Leucine-rich repeat	225	284	VLRNLYLNNNYLTGGIPAQLANLTNLEILYLSFNKMSGIIPPGLVHIPRLTYLYLDHNQF	9.9e-13	MARQSPLLEFTPLLILPLLLIGLVNCKTLKRDVKALNEIKASLGWRVVYSWVGDDPCGDGDLPPWSGVTCTTQGDYRVVTVLEVYAVSIVGPFPTAVTNLLDLTRLDLHNNKLIGPIPPQIGRLKRLKILNLRWNKLQDVIPPETGELKRLTHLYLSFNNFKGEIPKELANLPELRYLHLHENRFIGRIPPELGTLQNLQHLDVGNNHLVGTIRELIRIEGCFPVLRNLYLNNNYLTGGIPAQLANLTNLEILYLSFNKMSGIIPPGLVHIPRLTYLYLDHNQFSGRIPDAFYKHPFLKELYIEANAFRPGVNPIGVHQVLEVSDTDFLF	330	6969	https://onlinelibrary.wiley.com/doi/full/10.1111/pbi.13558
PlantKGA_431	Apiales	Araliaceae	Panax	notoginseng	Panax notoginseng		三七	chromosome	Yes	转录本	Pno16G001063t1	Pno16G001063t11288xxPlantKGA_431	Pno16G001063	L	partial	16	23735924	23742892	+	Pfam	PF13855	Leucine rich repeat	Leucine-rich repeat	126	185	RLKILNLRWNKLQDVIPPETGELKRLTHLYLSFNNFKGEIPKELANLPELRYLHLHENRF	7.7e-09	MARQSPLLEFTPLLILPLLLIGLVNCKTLKRDVKALNEIKASLGWRVVYSWVGDDPCGDGDLPPWSGVTCTTQGDYRVVTVLEVYAVSIVGPFPTAVTNLLDLTRLDLHNNKLIGPIPPQIGRLKRLKILNLRWNKLQDVIPPETGELKRLTHLYLSFNNFKGEIPKELANLPELRYLHLHENRFIGRIPPELGTLQNLQHLDVGNNHLVGTIRELIRIEGCFPVLRNLYLNNNYLTGGIPAQLANLTNLEILYLSFNKMSGIIPPGLVHIPRLTYLYLDHNQFSGRIPDAFYKHPFLKELYIEANAFRPGVNPIGVHQVLEVSDTDFLF	330	6969	https://onlinelibrary.wiley.com/doi/full/10.1111/pbi.13558
PlantKGA_431	Apiales	Araliaceae	Panax	notoginseng	Panax notoginseng		三七	chromosome	Yes	转录本	Pno16G002268t1	Pno16G002268t11288xxPlantKGA_431	Pno16G002268	L	partial	16	8966037	8967685	-	Pfam	PF08263	Leucine rich repeat N-terminal domain	Leucine-rich repeat-containing N-terminal, plant-type	56	88	ALQAWKHAITSDPKNFTSDWYGPHVCNYTGVYC	4.8e-05	MKIINPILFLSLTTLLFFPKPSHHQSILSPIASPLLPNPNFPDLIPNPRLEKAYIALQAWKHAITSDPKNFTSDWYGPHVCNYTGVYCAPAPDNPKLQTVAGIDLNHGNIVGYLPDDLGLLTDLSLFHINSNRFSGTLPESFHDLRLLYELDISNNRFSGNFPNVVLSLPSLKFLDIRFNAYKGDIPSKVYDLKLDALFINNNKFQVTFPKNFGNSPVSVVVLANNKINGCFPASIAKMGKTLNEIIVSNAGLTGCLPPEIGELKNLTVFDVSSNTLTGTLPESMGKMKSLEQLNVANNKFYGDIPSIICSLPRLENFTYSSNYFCGEPAVCLKLPDKDDRKNCLPKRPLQRSVMECKSFYLHPPDCSDFGCSPRSPPPPPPPPPPSPPPPPPPPPPPH…	409	1649	https://onlinelibrary.wiley.com/doi/full/10.1111/pbi.13558
PlantKGA_431	Apiales	Araliaceae	Panax	notoginseng	Panax notoginseng		三七	chromosome	Yes	转录本	Pno16G002268t1	Pno16G002268t11288xxPlantKGA_431	Pno16G002268	L	partial	16	8966037	8967685	-	Pfam	PF13855	Leucine rich repeat	Leucine-rich repeat	124	180	LSLFHINSNRFSGTLPESFHDLRLLYELDISNNRFSGNFPNVVLSLPSLKFLDIRFN	2.7e-06	MKIINPILFLSLTTLLFFPKPSHHQSILSPIASPLLPNPNFPDLIPNPRLEKAYIALQAWKHAITSDPKNFTSDWYGPHVCNYTGVYCAPAPDNPKLQTVAGIDLNHGNIVGYLPDDLGLLTDLSLFHINSNRFSGTLPESFHDLRLLYELDISNNRFSGNFPNVVLSLPSLKFLDIRFNAYKGDIPSKVYDLKLDALFINNNKFQVTFPKNFGNSPVSVVVLANNKINGCFPASIAKMGKTLNEIIVSNAGLTGCLPPEIGELKNLTVFDVSSNTLTGTLPESMGKMKSLEQLNVANNKFYGDIPSIICSLPRLENFTYSSNYFCGEPAVCLKLPDKDDRKNCLPKRPLQRSVMECKSFYLHPPDCSDFGCSPRSPPPPPPPPPPSPPPPPPPPPPPH…	409	1649	https://onlinelibrary.wiley.com/doi/full/10.1111/pbi.13558
PlantKGA_431	Apiales	Araliaceae	Panax	notoginseng	Panax notoginseng		三七	chromosome	Yes	转录本	Pno17G000432t1	Pno17G000432t11288xxPlantKGA_431	Pno17G000432	L	partial	17	3010584	3011920	+	Pfam	PF13855	Leucine rich repeat	Leucine-rich repeat	155	215	PHLQHIQLTNNQFTGSIPISFSNCSNLEIFQLSNNNFDGKLAIDFGRLENINIINLQQNNL	1.9e-07	MSRGLAGPLSPFVGNLSFLRVLQLLNNSLYGEIPPQLGYLFRLKALNLNNNNFEGEFLANISRCSNLTVLGVSHNNLSGKIPTELSSLSGLTVLIIDHNKFTGPIPHFLVNMTLLQTVSVAQNLFSGSIPDSIGQLTSLNILNLGFNNLSGSMFPHLQHIQLTNNQFTGSIPISFSNCSNLEIFQLSNNNFDGKLAIDFGRLENINIINLQQNNLGSGETDEMNFISSTANCSKLKFFTLEANKLSGSLPNFVGNLSSELTFLDFGENQLYGTVPPTIDNLVGLTTLALFDNQFTDTIPTSIGNLAKLQRLHPYKNKFSGTIPISIGNMSFLIELYTNMNRLEDIIPESIGNCKSLLFLKISQNNLSGSIPKQLFRLPALSILLNLSVNHLNGSLLLDG…	414	1337	https://onlinelibrary.wiley.com/doi/full/10.1111/pbi.13558
PlantKGA_431	Apiales	Araliaceae	Panax	notoginseng	Panax notoginseng		三七	chromosome	Yes	转录本	Pno17G001027t1	Pno17G001027t11288xxPlantKGA_431	Pno17G001027	L	partial	17	7577071	7579036	+	Pfam	PF08263	Leucine rich repeat N-terminal domain	Leucine-rich repeat-containing N-terminal, plant-type	62	100	NNAYTALQAWKSSIKDDPLGILKTWVGSNVCAYKGVFCS	1.8e-06	MERNLVLYFLLQMIATEAAFSVGGGVGLGVGIGGVGGGSGGVWVGGINSPTPSGSSSASKLNNAYTALQAWKSSIKDDPLGILKTWVGSNVCAYKGVFCSDLQNEMGGSSISVVAGIDLNHANLQGTLVKELSLLSDMSLLHLNTNRFTGTIPDTYRNLLSLTELDLSNNHFSGPFPTSTLLIPNLLYLDLRFNNFQGPIPEDVFNKKLDAIFLNNNQFDGEIPQNLGNSPASVINLANNKLTGDIPFSIGYTSPELKEVLFLNNQLTGCIPDGIGLWSDLEVLDVSFNSIMGRLPNSISCLNGIEVLNLGHNKISGELPGLVCSLKSLVNLSVAYNFLSGFSQECSKLLDRNVGFDFTSNCIPGREMQRPQPECSGIPGGSLNCLRIPAPKPLVCGAL…	413	1966	https://onlinelibrary.wiley.com/doi/full/10.1111/pbi.13558
PlantKGA_431	Apiales	Araliaceae	Panax	notoginseng	Panax notoginseng		三七	chromosome	Yes	转录本	Pno17G001027t1	Pno17G001027t11288xxPlantKGA_431	Pno17G001027	L	partial	17	7577071	7579036	+	Pfam	PF13516	Leucine Rich repeat	Leucine-rich repeat	160	174	LSLTELDLSNNHFSG	1.4	MERNLVLYFLLQMIATEAAFSVGGGVGLGVGIGGVGGGSGGVWVGGINSPTPSGSSSASKLNNAYTALQAWKSSIKDDPLGILKTWVGSNVCAYKGVFCSDLQNEMGGSSISVVAGIDLNHANLQGTLVKELSLLSDMSLLHLNTNRFTGTIPDTYRNLLSLTELDLSNNHFSGPFPTSTLLIPNLLYLDLRFNNFQGPIPEDVFNKKLDAIFLNNNQFDGEIPQNLGNSPASVINLANNKLTGDIPFSIGYTSPELKEVLFLNNQLTGCIPDGIGLWSDLEVLDVSFNSIMGRLPNSISCLNGIEVLNLGHNKISGELPGLVCSLKSLVNLSVAYNFLSGFSQECSKLLDRNVGFDFTSNCIPGREMQRPQPECSGIPGGSLNCLRIPAPKPLVCGAL…	413	1966	https://onlinelibrary.wiley.com/doi/full/10.1111/pbi.13558
PlantKGA_431	Apiales	Araliaceae	Panax	notoginseng	Panax notoginseng		三七	chromosome	Yes	转录本	Pno17G001082t1	Pno17G001082t11288xxPlantKGA_431	Pno17G001082	L	partial	17	8024866	8031211	+	Pfam	PF12799	Leucine Rich repeats (2 copies)	Leucine rich repeat 4	251	291	NLRVLDVSSNKLTTINDIENLSQLEDLWLNNNQISSLEGIA	1e-07	MDQKSEPNHEDSIIEEDDDDDDESSPTILDITSFQLHDLSSVELPPSLTELDLTANRLKSLDPRIGHLLNLKKLSCRQNLFDDAGVEPISHWDAISDLQELVLRDNQLKKIPDVGILKSLLVFDVSFNEISSLNGLSKISSTLKELYVSKNEVPKIEEIDHFHDLQLLELGSNRLRVMENLQNLTNLLELWLGRNRIKAINLCGLKCIKKLSLQSNRLTSMTGLEECVALEELYFSHNGIAQMEGLSTLVNLRVLDVSSNKLTTINDIENLSQLEDLWLNNNQISSLEGIAEAVAGSREKLTTIYLEHNPCQAKSPAYIATMRQIFLNVQQVDSEMFA	338	6346	https://onlinelibrary.wiley.com/doi/full/10.1111/pbi.13558
PlantKGA_431	Apiales	Araliaceae	Panax	notoginseng	Panax notoginseng		三七	chromosome	Yes	转录本	Pno17G001266t1	Pno17G001266t11288xxPlantKGA_431	Pno17G001266	L	partial	17	9598262	9600539	+	Pfam	PF08263	Leucine rich repeat N-terminal domain	Leucine-rich repeat-containing N-terminal, plant-type	68	101	IALQAWKQAILSDPLNLTGNWVGSDVCNYTGVFC	6.2e-05	MTKKSNFTRCFFSQAESITNGPLTDAETLYIKHRQLLYYRDEYGDRGENVTVDPTLVFENPRLKNAYIALQAWKQAILSDPLNLTGNWVGSDVCNYTGVFCAPAPDNSSDRTVAGIDLNHGDIAGYLPEELGLLTDLALFHINSNRFCGTIPRKFNNLRILYELDVNLRFNEFEGKVPKELFDKDLDAIFINHNRFRFQIPENFGNSPVSVVVLAGNNFHGCLPASIGNMSDTLNEVIMMDNGLRSCFPPEIGLLKELTVFDASFNELLGPLPDSIGGMVSLEQLNVAHNLLSGSIPASICSLPRLQNFTYSYNFFTGEPPACLALPDFSDRRNCLPGRPAQRSAGQCKGFLTKKVDCNSFNCAPFVPTLPTPPPPSPPLPVPSPPVVIPSPPPPVISS…	721	2278	https://onlinelibrary.wiley.com/doi/full/10.1111/pbi.13558
PlantKGA_431	Apiales	Araliaceae	Panax	notoginseng	Panax notoginseng		三七	chromosome	Yes	转录本	Pno18G000004t1	Pno18G000004t11288xxPlantKGA_431	Pno18G000004	L	partial	18	10033410	10045632	-	Pfam	PF14580	Leucine-rich repeat	-	1	173	MVRLTADLIWKSPHFFNALRERELDLRGNKIAVIENVGATEDQFDCIDLSDNEIVKLENFPYLNRLGTLLLNNNRITRINPNIGEFLPKLHSLVLTNNRLVNLVEIDPLASLPKLKFLSLLDNNITKKPNYRLYVIHKLKSLRLLDFKKVKQKERTEASYVFASQEAEEEVKK	5.2e-81	MVRLTADLIWKSPHFFNALRERELDLRGNKIAVIENVGATEDQFDCIDLSDNEIVKLENFPYLNRLGTLLLNNNRITRINPNIGEFLPKLHSLVLTNNRLVNLVEIDPLASLPKLKFLSLLDNNITKKPNYRLYVIHKLKSLRLLDFKKVKQKERTEASYVFASQEAEEEVKKQSVKTFVPGEIPSNPEVPKEDQTPKNVSPTPEQIIAIKAAIVNSQTLEEVARLEQALKSGQLPADLDISDNDCMTNNENIKEDKMVTDGENEANEGASKDNNEQKKNDLAEMEQE	288	12223	https://onlinelibrary.wiley.com/doi/full/10.1111/pbi.13558
[truncated: 79,484 more rows]
