# Supplementary material for: PlantNLRatlas: a comprehensive dataset of full- and partial-length NLR resistance genes across 100 chromosome-level plant genomes
Source: Front Plant Sci. 2023 Apr 14;14:1178069. doi: 10.3389/fpls.2023.1178069 (PMC10146310; doi:10.3389/fpls.2023.1178069)
Supplement: Supplementary Table 3 — The subset of one gene divided into multiple NLR gene groups. [file Table_3.xlsx]

## Sheet: Sheet1
ID	Order	Family	Genus	Species	Latin	English	Chinese	Level	NLRs	ID.type	input.id	pep.id	gene.id	group	group.2	chrom	start	end	strand	db	db.id	domain.name.1	domain.name.2	domain.start	domain.end	domain.seq	pvalue	pep.seq	pep.len	gene.len	Paper.link	Download.link
PlantKGA_88	Piperales	Piperaceae	Piper	nigrum	Piper nigrum	black pepper	胡椒	chromosome	Yes	基因	evmmodelPn161001	evmmodelPn1610011288xxPlantKGA_88	evm.model.Pn16.1001	L	partial	Pn3	34142901	34148863	+	Pfam	PF13855	Leucine rich repeat	Leucine-rich repeat	167	223	LEKLFLDNNKLTVLPPELGQLKNLKVLTVDNNMLASVPVELRQCVKLVELSLEHNKL	5.9e-09	MSWGLAWKRPSDSFRIALRYGDSDSDDAAADQSPPGSLRIDLDWTAGDDEDQVALRLQSQLMVALPLPHDAVAIELAPRDRDGEAVGVEMRVVRRREPLRAVTMSKTAGSGQQTDGVGVLARLLRSKLDGSGCGDASDEHWNSTTNVGMQGLGLLTLPVEITRLSMLEKLFLDNNKLTVLPPELGQLKNLKVLTVDNNMLASVPVELRQCVKLVELSLEHNKLVRPLLDFRAMAELRTLRLFGNPLEFLPEILPLQNLRHLSLANIRIEADENLKSVNVKIETEVSSYFVASRHKLSAFFSLIFRFSSCHHPLLASALAKIVQDGGNRAVISKDENAMRQLISMISSDNRHVVEQACSALSSLAADRSLVMQLIKCDIMQPIQSLLKSMDPDELISVLE…	1284	5963	https://www.nature.com/articles/s41467-019-12607-6	http://cotton.hzau.edu.cn/EN/Download.htm
PlantKGA_88	Piperales	Piperaceae	Piper	nigrum	Piper nigrum	black pepper	胡椒	chromosome	Yes	基因	evmmodelPn161202	evmmodelPn1612021288xxPlantKGA_88	evm.model.Pn16.1202	L	partial	Pn3	27663420	27663832	-	Pfam	PF13516	Leucine Rich repeat	Leucine-rich repeat	15	29	LQSLDMRSNQLGSGG	1.1	DSCQISWDVTTRKALQSLDMRSNQLGSGGTFDDMNQFIHSLANCSHSLYKLALGDNQLSGVIPDEIGKLNGLEVLHLTGNKIAGKIPPALCNIAPLEELYLGNNQLVGAIPECLGDTLNLTHLDLSQNKLLGGDMA	136	413	https://www.nature.com/articles/s41467-019-12607-6	http://cotton.hzau.edu.cn/EN/Download.htm
PlantKGA_88	Piperales	Piperaceae	Piper	nigrum	Piper nigrum	black pepper	胡椒	chromosome	Yes	基因	evmmodelPn161202	evmmodelPn1612021288xxPlantKGA_88	evm.model.Pn16.1202	L	partial	Pn3	27663420	27663832	-	Pfam	PF13516	Leucine Rich repeat	Leucine-rich repeat	119	133	NLTHLDLSQNKLLGG	0.74	DSCQISWDVTTRKALQSLDMRSNQLGSGGTFDDMNQFIHSLANCSHSLYKLALGDNQLSGVIPDEIGKLNGLEVLHLTGNKIAGKIPPALCNIAPLEELYLGNNQLVGAIPECLGDTLNLTHLDLSQNKLLGGDMA	136	413	https://www.nature.com/articles/s41467-019-12607-6	http://cotton.hzau.edu.cn/EN/Download.htm
PlantKGA_88	Piperales	Piperaceae	Piper	nigrum	Piper nigrum	black pepper	胡椒	chromosome	Yes	基因	evmmodelPn161202	evmmodelPn1612021288xxPlantKGA_88	evm.model.Pn16.1202	L	partial	Pn3	27663420	27663832	-	Pfam	PF13855	Leucine rich repeat	Leucine-rich repeat	47	106	SLYKLALGDNQLSGVIPDEIGKLNGLEVLHLTGNKIAGKIPPALCNIAPLEELYLGNNQL	7.1e-09	DSCQISWDVTTRKALQSLDMRSNQLGSGGTFDDMNQFIHSLANCSHSLYKLALGDNQLSGVIPDEIGKLNGLEVLHLTGNKIAGKIPPALCNIAPLEELYLGNNQLVGAIPECLGDTLNLTHLDLSQNKLLGGDMA	136	413	https://www.nature.com/articles/s41467-019-12607-6	http://cotton.hzau.edu.cn/EN/Download.htm
PlantKGA_88	Piperales	Piperaceae	Piper	nigrum	Piper nigrum	black pepper	胡椒	chromosome	Yes	基因	evmmodelPn161204	evmmodelPn1612041288xxPlantKGA_88	evm.model.Pn16.1204	L	partial	Pn3	27690160	27691542	-	Pfam	PF00560	Leucine Rich Repeat	Leucine-rich repeat	68	90	RLRRLDLSWNSFTGEIPLNLTNC	0.078	MGVSCGRRHQRVSGLDFSSFNLSGTLSPYIGNLSFLRYINLRSEYRLGWEESNKLQGAIPNEIGRLYRLRRLDLSWNSFTGEIPLNLTNCLSLEEMNLAGNNITGKIPNQLGSLSRLETLFLDVNQHTGSIPSSLGNLSFLTWLDLRANNLQGAIPSEIGHLYRLRKLDLSWGSFSGEIPPNLTNCLSLEEMNLARSNITGKIPNQLGSLSRLKILNLYRNHLTGSIPSSSGNLSSLTWLELSSNNLNGTIPDSIYNLSGIIYFGIAKNKLSGKLPTNLGMHLLPNMGQFYGDSNKLGGHIPVSLANASHLVALSLSHNEFRGFLPNFMGCNNKWGLQSLDLRSNQLGSGGTNDDMTQFIHSLANCSRNLLGLSLLLGDNQLSGGIPHEIGELNNLLVL…	460	1383	https://www.nature.com/articles/s41467-019-12607-6	http://cotton.hzau.edu.cn/EN/Download.htm
PlantKGA_88	Piperales	Piperaceae	Piper	nigrum	Piper nigrum	black pepper	胡椒	chromosome	Yes	基因	evmmodelPn161204	evmmodelPn1612041288xxPlantKGA_88	evm.model.Pn16.1204	L	partial	Pn3	27690160	27691542	-	Pfam	PF13855	Leucine rich repeat	Leucine-rich repeat	188	247	SLEEMNLARSNITGKIPNQLGSLSRLKILNLYRNHLTGSIPSSSGNLSSLTWLELSSNNL	2.1e-07	MGVSCGRRHQRVSGLDFSSFNLSGTLSPYIGNLSFLRYINLRSEYRLGWEESNKLQGAIPNEIGRLYRLRRLDLSWNSFTGEIPLNLTNCLSLEEMNLAGNNITGKIPNQLGSLSRLETLFLDVNQHTGSIPSSLGNLSFLTWLDLRANNLQGAIPSEIGHLYRLRKLDLSWGSFSGEIPPNLTNCLSLEEMNLARSNITGKIPNQLGSLSRLKILNLYRNHLTGSIPSSSGNLSSLTWLELSSNNLNGTIPDSIYNLSGIIYFGIAKNKLSGKLPTNLGMHLLPNMGQFYGDSNKLGGHIPVSLANASHLVALSLSHNEFRGFLPNFMGCNNKWGLQSLDLRSNQLGSGGTNDDMTQFIHSLANCSRNLLGLSLLLGDNQLSGGIPHEIGELNNLLVL…	460	1383	https://www.nature.com/articles/s41467-019-12607-6	http://cotton.hzau.edu.cn/EN/Download.htm
PlantKGA_88	Piperales	Piperaceae	Piper	nigrum	Piper nigrum	black pepper	胡椒	chromosome	Yes	基因	evmmodelPn161207	evmmodelPn1612071288xxPlantKGA_88	evm.model.Pn16.1207	L	partial	Pn3	27710339	27710704	-	Pfam	PF00560	Leucine Rich Repeat	Leucine-rich repeat	40	60	LNVLHLTGNKITGKIPPALCN	1.1	MSQIIHSLANCSGGILQYLHLGDNQLSGDIPREIGKLNFLNVLHLTGNKITGKIPPALCNIAPLEGLYLGNNQLVGAIPECLSDTLNLTEFDLSQNKLLGGDMAWEFAVMMRDACRSPSSN	121	366	https://www.nature.com/articles/s41467-019-12607-6	http://cotton.hzau.edu.cn/EN/Download.htm
PlantKGA_88	Piperales	Piperaceae	Piper	nigrum	Piper nigrum	black pepper	胡椒	chromosome	Yes	基因	evmmodelPn161207	evmmodelPn1612071288xxPlantKGA_88	evm.model.Pn16.1207	L	partial	Pn3	27710339	27710704	-	Pfam	PF00560	Leucine Rich Repeat	Leucine-rich repeat	16	37	LQYLHLGDNQLSGDIPREIGKL	0.77	MSQIIHSLANCSGGILQYLHLGDNQLSGDIPREIGKLNFLNVLHLTGNKITGKIPPALCNIAPLEGLYLGNNQLVGAIPECLSDTLNLTEFDLSQNKLLGGDMAWEFAVMMRDACRSPSSN	121	366	https://www.nature.com/articles/s41467-019-12607-6	http://cotton.hzau.edu.cn/EN/Download.htm
PlantKGA_88	Piperales	Piperaceae	Piper	nigrum	Piper nigrum	black pepper	胡椒	chromosome	Yes	基因	evmmodelPn161240	evmmodelPn1612401288xxPlantKGA_88	evm.model.Pn16.1240	L	partial	Pn3	27998338	28001253	-	Pfam	PF13855	Leucine rich repeat	Leucine-rich repeat	102	157	DLSLNYNIIGKIPSQLGSLSRLKTLGLYGNQLTGSIPSSLGNLSRLQALNLDGNQL	4.2e-07	ALASWNHSLYFCDWKGVSCGRRHQRVTGLDIIGSFNSSGTLSPYIGNLSFLRHIHLQMNLQGAIPSEIGRLYRLRRLDLSWNSFSGEIPLNLTNCLSPEDMDLSLNYNIIGKIPSQLGSLSRLKTLGLYGNQLTGSIPSSLGNLSRLQALNLDGNQLTGSIPSSLGNLSSLEDMDLGHNNITRKIPNQLGSLSKLKALNLAGNQLTGSIPSSLGNLSSLEEVHLSSNKITGKIPNQLGSLSRLKTLYLFGNQLTGSIPSSLGNLSSLTSLNLVFNNLNGTIPDSIYNLYEITYLVIEHNKLSGKLPTNLGMELLPNLEYFYGGSNKLGGHIPVSLANASNLVELSLSHNEFRGFLPNFIGCNNLRSLDLRSNQLGSGGTNDDMSQFIHSLANCSPNLEV…	536	2916	https://www.nature.com/articles/s41467-019-12607-6	http://cotton.hzau.edu.cn/EN/Download.htm
PlantKGA_88	Piperales	Piperaceae	Piper	nigrum	Piper nigrum	black pepper	胡椒	chromosome	Yes	基因	evmmodelPn161240	evmmodelPn1612401288xxPlantKGA_88	evm.model.Pn16.1240	L	partial	Pn3	27998338	28001253	-	Pfam	PF13855	Leucine rich repeat	Leucine-rich repeat	210	253	PSSLGNLSSLEEVHLSSNKITGKIPNQLGSLSRLKTLYLFGNQL	2.3e-06	ALASWNHSLYFCDWKGVSCGRRHQRVTGLDIIGSFNSSGTLSPYIGNLSFLRHIHLQMNLQGAIPSEIGRLYRLRRLDLSWNSFSGEIPLNLTNCLSPEDMDLSLNYNIIGKIPSQLGSLSRLKTLGLYGNQLTGSIPSSLGNLSRLQALNLDGNQLTGSIPSSLGNLSSLEDMDLGHNNITRKIPNQLGSLSKLKALNLAGNQLTGSIPSSLGNLSSLEEVHLSSNKITGKIPNQLGSLSRLKTLYLFGNQLTGSIPSSLGNLSSLTSLNLVFNNLNGTIPDSIYNLYEITYLVIEHNKLSGKLPTNLGMELLPNLEYFYGGSNKLGGHIPVSLANASNLVELSLSHNEFRGFLPNFIGCNNLRSLDLRSNQLGSGGTNDDMSQFIHSLANCSPNLEV…	536	2916	https://www.nature.com/articles/s41467-019-12607-6	http://cotton.hzau.edu.cn/EN/Download.htm
PlantKGA_88	Piperales	Piperaceae	Piper	nigrum	Piper nigrum	black pepper	胡椒	chromosome	Yes	基因	evmmodelPn161240	evmmodelPn1612401288xxPlantKGA_88	evm.model.Pn16.1240	L	partial	Pn3	27998338	28001253	-	Pfam	PF13855	Leucine rich repeat	Leucine-rich repeat	162	205	PSSLGNLSSLEDMDLGHNNITRKIPNQLGSLSKLKALNLAGNQL	2e-07	ALASWNHSLYFCDWKGVSCGRRHQRVTGLDIIGSFNSSGTLSPYIGNLSFLRHIHLQMNLQGAIPSEIGRLYRLRRLDLSWNSFSGEIPLNLTNCLSPEDMDLSLNYNIIGKIPSQLGSLSRLKTLGLYGNQLTGSIPSSLGNLSRLQALNLDGNQLTGSIPSSLGNLSSLEDMDLGHNNITRKIPNQLGSLSKLKALNLAGNQLTGSIPSSLGNLSSLEEVHLSSNKITGKIPNQLGSLSRLKTLYLFGNQLTGSIPSSLGNLSSLTSLNLVFNNLNGTIPDSIYNLYEITYLVIEHNKLSGKLPTNLGMELLPNLEYFYGGSNKLGGHIPVSLANASNLVELSLSHNEFRGFLPNFIGCNNLRSLDLRSNQLGSGGTNDDMSQFIHSLANCSPNLEV…	536	2916	https://www.nature.com/articles/s41467-019-12607-6	http://cotton.hzau.edu.cn/EN/Download.htm
PlantKGA_88	Piperales	Piperaceae	Piper	nigrum	Piper nigrum	black pepper	胡椒	chromosome	Yes	基因	evmmodelPn161240	evmmodelPn1612401288xxPlantKGA_88	evm.model.Pn16.1240	L	partial	Pn3	27998338	28001253	-	Pfam	PF13516	Leucine Rich repeat	Leucine-rich repeat	361	378	CNNLRSLDLRSNQLGSGG	0.063	ALASWNHSLYFCDWKGVSCGRRHQRVTGLDIIGSFNSSGTLSPYIGNLSFLRHIHLQMNLQGAIPSEIGRLYRLRRLDLSWNSFSGEIPLNLTNCLSPEDMDLSLNYNIIGKIPSQLGSLSRLKTLGLYGNQLTGSIPSSLGNLSRLQALNLDGNQLTGSIPSSLGNLSSLEDMDLGHNNITRKIPNQLGSLSKLKALNLAGNQLTGSIPSSLGNLSSLEEVHLSSNKITGKIPNQLGSLSRLKTLYLFGNQLTGSIPSSLGNLSSLTSLNLVFNNLNGTIPDSIYNLYEITYLVIEHNKLSGKLPTNLGMELLPNLEYFYGGSNKLGGHIPVSLANASNLVELSLSHNEFRGFLPNFIGCNNLRSLDLRSNQLGSGGTNDDMSQFIHSLANCSPNLEV…	536	2916	https://www.nature.com/articles/s41467-019-12607-6	http://cotton.hzau.edu.cn/EN/Download.htm
PlantKGA_88	Piperales	Piperaceae	Piper	nigrum	Piper nigrum	black pepper	胡椒	chromosome	Yes	基因	evmmodelPn161240	evmmodelPn1612401288xxPlantKGA_88	evm.model.Pn16.1240	L	partial	Pn3	27998338	28001253	-	Pfam	PF00560	Leucine Rich Repeat	Leucine-rich repeat	73	95	RLRRLDLSWNSFSGEIPLNLTNC	0.19	ALASWNHSLYFCDWKGVSCGRRHQRVTGLDIIGSFNSSGTLSPYIGNLSFLRHIHLQMNLQGAIPSEIGRLYRLRRLDLSWNSFSGEIPLNLTNCLSPEDMDLSLNYNIIGKIPSQLGSLSRLKTLGLYGNQLTGSIPSSLGNLSRLQALNLDGNQLTGSIPSSLGNLSSLEDMDLGHNNITRKIPNQLGSLSKLKALNLAGNQLTGSIPSSLGNLSSLEEVHLSSNKITGKIPNQLGSLSRLKTLYLFGNQLTGSIPSSLGNLSSLTSLNLVFNNLNGTIPDSIYNLYEITYLVIEHNKLSGKLPTNLGMELLPNLEYFYGGSNKLGGHIPVSLANASNLVELSLSHNEFRGFLPNFIGCNNLRSLDLRSNQLGSGGTNDDMSQFIHSLANCSPNLEV…	536	2916	https://www.nature.com/articles/s41467-019-12607-6	http://cotton.hzau.edu.cn/EN/Download.htm
PlantKGA_88	Piperales	Piperaceae	Piper	nigrum	Piper nigrum	black pepper	胡椒	chromosome	Yes	基因	evmmodelPn161256	evmmodelPn1612561288xxPlantKGA_88	evm.model.Pn16.1256	L	partial	Pn3	28154028	28154831	+	Pfam	PF13855	Leucine rich repeat	Leucine-rich repeat	38	98	SRLNTLNLYGNQLTGSIPSSLGNLSSLEEVHLSSNKITGKIPNQLDSLSRLKTLYLFGNQL	1.2e-09	MQSQNLFSPSKLYEFFIGRNLAGSNITGKIPNQLGSLSRLNTLNLYGNQLTGSIPSSLGNLSSLEEVHLSSNKITGKIPNQLDSLSRLKTLYLFGNQLTGSIPSSLGNLSALTSLNLGFNNLNGTILDSIYNLSEITDLGIAHNKLSGKLPTNLGMELLPNLIYFDGGSNKLGGHIPVSLANASHLVYLSLPHNEFIGFVPNFMGCNNNKWGLWRLNLRSNQLGSGGTNDDMSQFIPSLANCSRDLKELVLGDNRLSGRIPDEIGKL	267	804	https://www.nature.com/articles/s41467-019-12607-6	http://cotton.hzau.edu.cn/EN/Download.htm
PlantKGA_88	Piperales	Piperaceae	Piper	nigrum	Piper nigrum	black pepper	胡椒	chromosome	Yes	基因	evmmodelPn161256	evmmodelPn1612561288xxPlantKGA_88	evm.model.Pn16.1256	L	partial	Pn3	28154028	28154831	+	Pfam	PF13516	Leucine Rich repeat	Leucine-rich repeat	112	129	LTSLNLGFNNLNGTILDS	1.5	MQSQNLFSPSKLYEFFIGRNLAGSNITGKIPNQLGSLSRLNTLNLYGNQLTGSIPSSLGNLSSLEEVHLSSNKITGKIPNQLDSLSRLKTLYLFGNQLTGSIPSSLGNLSALTSLNLGFNNLNGTILDSIYNLSEITDLGIAHNKLSGKLPTNLGMELLPNLIYFDGGSNKLGGHIPVSLANASHLVYLSLPHNEFIGFVPNFMGCNNNKWGLWRLNLRSNQLGSGGTNDDMSQFIPSLANCSRDLKELVLGDNRLSGRIPDEIGKL	267	804	https://www.nature.com/articles/s41467-019-12607-6	http://cotton.hzau.edu.cn/EN/Download.htm
PlantKGA_88	Piperales	Piperaceae	Piper	nigrum	Piper nigrum	black pepper	胡椒	chromosome	Yes	基因	evmmodelPn161269	evmmodelPn1612691288xxPlantKGA_88	evm.model.Pn16.1269	L	partial	Pn3	28271415	28277632	+	Pfam	PF13516	Leucine Rich repeat	Leucine-rich repeat	800	814	LRYLDLRSNQLGSGG	1.9	MARGEQFLAGERREGNGGSNAQPGSPSLTIPVSVIIPTFSFLKSTTTSSPTPSIIAMYPASYSYHFALKSKLFVFRISIRGKPNEDAVLCTSSDTYALKLVGTSNSVFLVPPAVVWADSGEGDCTSTRWASILKVSSGSMELVRIAPKLDKLKQLLHQKPYKPEEEEEDEYGNVNSMQPRTRIYQWSDLINVIQASDEELRAGLKALLAVQINGYLRVVDERSMSEVLKSLLNNSNLYEWLLTSLNETEVIASLEADGFSCALAFHCLETFGNRKENEGDGAHVWSLDERRICLHFAKQVLRSGRRKIESFLEVIASLEADGFSCALAFHCLETFGNRKENEGDGAHVWSLDERRICLHFAKQVLRSGRRKIESFLEEWNRRIPIGMQTSLDMLEGEVL…	922	6218	https://www.nature.com/articles/s41467-019-12607-6	http://cotton.hzau.edu.cn/EN/Download.htm
PlantKGA_88	Piperales	Piperaceae	Piper	nigrum	Piper nigrum	black pepper	胡椒	chromosome	Yes	基因	evmmodelPn161269	evmmodelPn1612691288xxPlantKGA_88	evm.model.Pn16.1269	L	partial	Pn3	28271415	28277632	+	Pfam	PF00560	Leucine Rich Repeat	Leucine-rich repeat	603	625	SLTSLDLSFNYITGKIPNQLGSL	0.61	MARGEQFLAGERREGNGGSNAQPGSPSLTIPVSVIIPTFSFLKSTTTSSPTPSIIAMYPASYSYHFALKSKLFVFRISIRGKPNEDAVLCTSSDTYALKLVGTSNSVFLVPPAVVWADSGEGDCTSTRWASILKVSSGSMELVRIAPKLDKLKQLLHQKPYKPEEEEEDEYGNVNSMQPRTRIYQWSDLINVIQASDEELRAGLKALLAVQINGYLRVVDERSMSEVLKSLLNNSNLYEWLLTSLNETEVIASLEADGFSCALAFHCLETFGNRKENEGDGAHVWSLDERRICLHFAKQVLRSGRRKIESFLEVIASLEADGFSCALAFHCLETFGNRKENEGDGAHVWSLDERRICLHFAKQVLRSGRRKIESFLEEWNRRIPIGMQTSLDMLEGEVL…	922	6218	https://www.nature.com/articles/s41467-019-12607-6	http://cotton.hzau.edu.cn/EN/Download.htm
PlantKGA_88	Piperales	Piperaceae	Piper	nigrum	Piper nigrum	black pepper	胡椒	chromosome	Yes	基因	evmmodelPn161269	evmmodelPn1612691288xxPlantKGA_88	evm.model.Pn16.1269	L	partial	Pn3	28271415	28277632	+	Pfam	PF00560	Leucine Rich Repeat	Leucine-rich repeat	536	558	RLRRLDLSWNSLSVEIPLNLTNC	0.68	MARGEQFLAGERREGNGGSNAQPGSPSLTIPVSVIIPTFSFLKSTTTSSPTPSIIAMYPASYSYHFALKSKLFVFRISIRGKPNEDAVLCTSSDTYALKLVGTSNSVFLVPPAVVWADSGEGDCTSTRWASILKVSSGSMELVRIAPKLDKLKQLLHQKPYKPEEEEEDEYGNVNSMQPRTRIYQWSDLINVIQASDEELRAGLKALLAVQINGYLRVVDERSMSEVLKSLLNNSNLYEWLLTSLNETEVIASLEADGFSCALAFHCLETFGNRKENEGDGAHVWSLDERRICLHFAKQVLRSGRRKIESFLEVIASLEADGFSCALAFHCLETFGNRKENEGDGAHVWSLDERRICLHFAKQVLRSGRRKIESFLEEWNRRIPIGMQTSLDMLEGEVL…	922	6218	https://www.nature.com/articles/s41467-019-12607-6	http://cotton.hzau.edu.cn/EN/Download.htm
PlantKGA_88	Piperales	Piperaceae	Piper	nigrum	Piper nigrum	black pepper	胡椒	chromosome	Yes	基因	evmmodelPn161269	evmmodelPn1612691288xxPlantKGA_88	evm.model.Pn16.1269	L	partial	Pn3	28271415	28277632	+	Pfam	PF13855	Leucine rich repeat	Leucine-rich repeat	674	734	SRLKELYLGDNQLTGSIPSSLGNLSSLIWLDLGSNNLNGTIPDSIYNLSDVTYFRIDHNKL	2.2e-09	MARGEQFLAGERREGNGGSNAQPGSPSLTIPVSVIIPTFSFLKSTTTSSPTPSIIAMYPASYSYHFALKSKLFVFRISIRGKPNEDAVLCTSSDTYALKLVGTSNSVFLVPPAVVWADSGEGDCTSTRWASILKVSSGSMELVRIAPKLDKLKQLLHQKPYKPEEEEEDEYGNVNSMQPRTRIYQWSDLINVIQASDEELRAGLKALLAVQINGYLRVVDERSMSEVLKSLLNNSNLYEWLLTSLNETEVIASLEADGFSCALAFHCLETFGNRKENEGDGAHVWSLDERRICLHFAKQVLRSGRRKIESFLEVIASLEADGFSCALAFHCLETFGNRKENEGDGAHVWSLDERRICLHFAKQVLRSGRRKIESFLEEWNRRIPIGMQTSLDMLEGEVL…	922	6218	https://www.nature.com/articles/s41467-019-12607-6	http://cotton.hzau.edu.cn/EN/Download.htm
PlantKGA_88	Piperales	Piperaceae	Piper	nigrum	Piper nigrum	black pepper	胡椒	chromosome	Yes	基因	evmmodelPn161269	evmmodelPn1612691288xxPlantKGA_88	evm.model.Pn16.1269	L	partial	Pn3	28271415	28277632	+	Pfam	PF08263	Leucine rich repeat N-terminal domain	Leucine-rich repeat-containing N-terminal, plant-type	433	468	ALLAIKEQITSDDPNGGALASWNHSLHFCDWKGVSC	2.8e-09	MARGEQFLAGERREGNGGSNAQPGSPSLTIPVSVIIPTFSFLKSTTTSSPTPSIIAMYPASYSYHFALKSKLFVFRISIRGKPNEDAVLCTSSDTYALKLVGTSNSVFLVPPAVVWADSGEGDCTSTRWASILKVSSGSMELVRIAPKLDKLKQLLHQKPYKPEEEEEDEYGNVNSMQPRTRIYQWSDLINVIQASDEELRAGLKALLAVQINGYLRVVDERSMSEVLKSLLNNSNLYEWLLTSLNETEVIASLEADGFSCALAFHCLETFGNRKENEGDGAHVWSLDERRICLHFAKQVLRSGRRKIESFLEVIASLEADGFSCALAFHCLETFGNRKENEGDGAHVWSLDERRICLHFAKQVLRSGRRKIESFLEEWNRRIPIGMQTSLDMLEGEVL…	922	6218	https://www.nature.com/articles/s41467-019-12607-6	http://cotton.hzau.edu.cn/EN/Download.htm
PlantKGA_88	Piperales	Piperaceae	Piper	nigrum	Piper nigrum	black pepper	胡椒	chromosome	Yes	基因	evmmodelPn161308	evmmodelPn1613081288xxPlantKGA_88	evm.model.Pn16.1308	L	partial	Pn3	28584181	28585134	+	Pfam	PF13855	Leucine rich repeat	Leucine-rich repeat	21	81	SRLKTLGLYGNQLTGSVPSSLGNLSSLEEMDLRRNNITEKIPNQLGSLSRLKELYLGDNQL	4.8e-10	MDLSFNYNIIGKIPSQLGSLSRLKTLGLYGNQLTGSVPSSLGNLSSLEEMDLRRNNITEKIPNQLGSLSRLKELYLGDNQLTGSIPSSLGNLSSLNFLDLGLNNLNGTIPDSIYNLSDVTYFRIDHNKLSGKLPTNLGMELLPNLKTFWGDSNKLGGHIPVSLANASNLEYLSLSHNEFRGFVPNFMGYKSKGRLWYLDLRSNQLGSGGTNDDMGQFIHALANCSGGNLYSLVLGDNQLSGGIPDEIGKLNNLRVLHLTGNKITGKIPPALCNIAPLDGLYLGNNQLVGAIPECLGDTLNLTGLDLSQNKLFGGDMA	317	954	https://www.nature.com/articles/s41467-019-12607-6	http://cotton.hzau.edu.cn/EN/Download.htm
PlantKGA_88	Piperales	Piperaceae	Piper	nigrum	Piper nigrum	black pepper	胡椒	chromosome	Yes	基因	evmmodelPn161308	evmmodelPn1613081288xxPlantKGA_88	evm.model.Pn16.1308	L	partial	Pn3	28584181	28585134	+	Pfam	PF13855	Leucine rich repeat	Leucine-rich repeat	228	287	NLYSLVLGDNQLSGGIPDEIGKLNNLRVLHLTGNKITGKIPPALCNIAPLDGLYLGNNQL	2e-07	MDLSFNYNIIGKIPSQLGSLSRLKTLGLYGNQLTGSVPSSLGNLSSLEEMDLRRNNITEKIPNQLGSLSRLKELYLGDNQLTGSIPSSLGNLSSLNFLDLGLNNLNGTIPDSIYNLSDVTYFRIDHNKLSGKLPTNLGMELLPNLKTFWGDSNKLGGHIPVSLANASNLEYLSLSHNEFRGFVPNFMGYKSKGRLWYLDLRSNQLGSGGTNDDMGQFIHALANCSGGNLYSLVLGDNQLSGGIPDEIGKLNNLRVLHLTGNKITGKIPPALCNIAPLDGLYLGNNQLVGAIPECLGDTLNLTGLDLSQNKLFGGDMA	317	954	https://www.nature.com/articles/s41467-019-12607-6	http://cotton.hzau.edu.cn/EN/Download.htm
PlantKGA_88	Piperales	Piperaceae	Piper	nigrum	Piper nigrum	black pepper	胡椒	chromosome	Yes	基因	evmmodelPn161391	evmmodelPn1613911288xxPlantKGA_88	evm.model.Pn16.1391	L	partial	Pn3	29356560	29358832	-	Pfam	PF13516	Leucine Rich repeat	Leucine-rich repeat	113	133	SLKVLRLHNCKGITDSGLKAV	0.75	MSALPSPAAGDDSTEVAVCINEFLEDDVLGDVLARLLSEEDKDAFGLVCKRWLLVRRTNRHRLCARAGPLMLRRLAARFTHVIELDLSQSVSRSFYPGVTDADLAVVASGFNSLKVLRLHNCKGITDSGLKAVGEGHINLQLLDVSYCRKVTDKGLGAVADRCLSLKSLHVSGCKLLTNRFLVSLAKSCCDLEELVLNGCYNITDEGIENLVCGCNRIKILDLNKCIKVDNFGVAKISQFCSSTLKVLKLMDCWRVGDESVYALAQNCNSIETLVIGGCRDVSDESVKSLARLCGSTLKRLKMDWCPNISDSSVQFLFLHCECLEVLDIGCCAEVSDAAFFSLENGKAQLHLRMLKVSGCPKITVAGIHSLTQFCKFLEYLDVTSCPLISRETCIEASL…	424	2273	https://www.nature.com/articles/s41467-019-12607-6	http://cotton.hzau.edu.cn/EN/Download.htm
PlantKGA_88	Piperales	Piperaceae	Piper	nigrum	Piper nigrum	black pepper	胡椒	chromosome	Yes	基因	evmmodelPn161391	evmmodelPn1613911288xxPlantKGA_88	evm.model.Pn16.1391	L	partial	Pn3	29356560	29358832	-	Pfam	PF13516	Leucine Rich repeat	Leucine-rich repeat	242	265	SSTLKVLKLMDCWRVGDESVYALA	0.07	MSALPSPAAGDDSTEVAVCINEFLEDDVLGDVLARLLSEEDKDAFGLVCKRWLLVRRTNRHRLCARAGPLMLRRLAARFTHVIELDLSQSVSRSFYPGVTDADLAVVASGFNSLKVLRLHNCKGITDSGLKAVGEGHINLQLLDVSYCRKVTDKGLGAVADRCLSLKSLHVSGCKLLTNRFLVSLAKSCCDLEELVLNGCYNITDEGIENLVCGCNRIKILDLNKCIKVDNFGVAKISQFCSSTLKVLKLMDCWRVGDESVYALAQNCNSIETLVIGGCRDVSDESVKSLARLCGSTLKRLKMDWCPNISDSSVQFLFLHCECLEVLDIGCCAEVSDAAFFSLENGKAQLHLRMLKVSGCPKITVAGIHSLTQFCKFLEYLDVTSCPLISRETCIEASL…	424	2273	https://www.nature.com/articles/s41467-019-12607-6	http://cotton.hzau.edu.cn/EN/Download.htm
PlantKGA_88	Piperales	Piperaceae	Piper	nigrum	Piper nigrum	black pepper	胡椒	chromosome	Yes	基因	evmmodelPn161391	evmmodelPn1613911288xxPlantKGA_88	evm.model.Pn16.1391	L	partial	Pn3	29356560	29358832	-	Pfam	PF13516	Leucine Rich repeat	Leucine-rich repeat	188	211	SCCDLEELVLNGCYNITDEGIENL	0.61	MSALPSPAAGDDSTEVAVCINEFLEDDVLGDVLARLLSEEDKDAFGLVCKRWLLVRRTNRHRLCARAGPLMLRRLAARFTHVIELDLSQSVSRSFYPGVTDADLAVVASGFNSLKVLRLHNCKGITDSGLKAVGEGHINLQLLDVSYCRKVTDKGLGAVADRCLSLKSLHVSGCKLLTNRFLVSLAKSCCDLEELVLNGCYNITDEGIENLVCGCNRIKILDLNKCIKVDNFGVAKISQFCSSTLKVLKLMDCWRVGDESVYALAQNCNSIETLVIGGCRDVSDESVKSLARLCGSTLKRLKMDWCPNISDSSVQFLFLHCECLEVLDIGCCAEVSDAAFFSLENGKAQLHLRMLKVSGCPKITVAGIHSLTQFCKFLEYLDVTSCPLISRETCIEASL…	424	2273	https://www.nature.com/articles/s41467-019-12607-6	http://cotton.hzau.edu.cn/EN/Download.htm
PlantKGA_88	Piperales	Piperaceae	Piper	nigrum	Piper nigrum	black pepper	胡椒	chromosome	Yes	基因	evmmodelPn161391	evmmodelPn1613911288xxPlantKGA_88	evm.model.Pn16.1391	L	partial	Pn3	29356560	29358832	-	Pfam	PF13516	Leucine Rich repeat	Leucine-rich repeat	138	160	INLQLLDVSYCRKVTDKGLGAVA	0.43	MSALPSPAAGDDSTEVAVCINEFLEDDVLGDVLARLLSEEDKDAFGLVCKRWLLVRRTNRHRLCARAGPLMLRRLAARFTHVIELDLSQSVSRSFYPGVTDADLAVVASGFNSLKVLRLHNCKGITDSGLKAVGEGHINLQLLDVSYCRKVTDKGLGAVADRCLSLKSLHVSGCKLLTNRFLVSLAKSCCDLEELVLNGCYNITDEGIENLVCGCNRIKILDLNKCIKVDNFGVAKISQFCSSTLKVLKLMDCWRVGDESVYALAQNCNSIETLVIGGCRDVSDESVKSLARLCGSTLKRLKMDWCPNISDSSVQFLFLHCECLEVLDIGCCAEVSDAAFFSLENGKAQLHLRMLKVSGCPKITVAGIHSLTQFCKFLEYLDVTSCPLISRETCIEASL…	424	2273	https://www.nature.com/articles/s41467-019-12607-6	http://cotton.hzau.edu.cn/EN/Download.htm
PlantKGA_88	Piperales	Piperaceae	Piper	nigrum	Piper nigrum	black pepper	胡椒	chromosome	Yes	基因	evmmodelPn161454	evmmodelPn1614541288xxPlantKGA_88	evm.model.Pn16.1454	L	partial	Pn3	26054469	26056754	-	Pfam	PF13516	Leucine Rich repeat	Leucine-rich repeat	113	133	SLKVLRLHNCKGITDSGLKAV	1.4	MSALPSPAAGDDSTEAAVCINEFLEDDVLGDVLARLLSEEDKDAFGLVCKRWLLVRRTNRHRLCARAGPLMLRKLAARFTHVIELDLSQSVSRSFYPGVTDADLAVVASGFDSLKVLRLHNCKGITDSGLKAVGEGHINLQLLDVSYCRKVTDKGLGAVADRCLSLKSLHVSGCKLLTNRFLVSLAKSCCDLEELVLNGCYNITDEGIENLVCGCNRIKILDLNKCIKVDYFGVAKISQFCSSTLKVLKLMDCWRVGDESVYALAQNCSSIETLVIGGCRDVSDESVKSLARLCGSTLKRLKMDWCPNISDSSVQFLFLHCECLEVLDIGCCAEVSDAAFFSLENGKAQLHLRMLKVSGCPKITVAGIHSLTQFCNVLEYLDVTSCPLISRESCIEASL…	425	2286	https://www.nature.com/articles/s41467-019-12607-6	http://cotton.hzau.edu.cn/EN/Download.htm
PlantKGA_88	Piperales	Piperaceae	Piper	nigrum	Piper nigrum	black pepper	胡椒	chromosome	Yes	基因	evmmodelPn161454	evmmodelPn1614541288xxPlantKGA_88	evm.model.Pn16.1454	L	partial	Pn3	26054469	26056754	-	Pfam	PF13516	Leucine Rich repeat	Leucine-rich repeat	242	265	SSTLKVLKLMDCWRVGDESVYALA	0.07	MSALPSPAAGDDSTEAAVCINEFLEDDVLGDVLARLLSEEDKDAFGLVCKRWLLVRRTNRHRLCARAGPLMLRKLAARFTHVIELDLSQSVSRSFYPGVTDADLAVVASGFDSLKVLRLHNCKGITDSGLKAVGEGHINLQLLDVSYCRKVTDKGLGAVADRCLSLKSLHVSGCKLLTNRFLVSLAKSCCDLEELVLNGCYNITDEGIENLVCGCNRIKILDLNKCIKVDYFGVAKISQFCSSTLKVLKLMDCWRVGDESVYALAQNCSSIETLVIGGCRDVSDESVKSLARLCGSTLKRLKMDWCPNISDSSVQFLFLHCECLEVLDIGCCAEVSDAAFFSLENGKAQLHLRMLKVSGCPKITVAGIHSLTQFCNVLEYLDVTSCPLISRESCIEASL…	425	2286	https://www.nature.com/articles/s41467-019-12607-6	http://cotton.hzau.edu.cn/EN/Download.htm
PlantKGA_88	Piperales	Piperaceae	Piper	nigrum	Piper nigrum	black pepper	胡椒	chromosome	Yes	基因	evmmodelPn161454	evmmodelPn1614541288xxPlantKGA_88	evm.model.Pn16.1454	L	partial	Pn3	26054469	26056754	-	Pfam	PF13516	Leucine Rich repeat	Leucine-rich repeat	138	160	INLQLLDVSYCRKVTDKGLGAVA	0.43	MSALPSPAAGDDSTEAAVCINEFLEDDVLGDVLARLLSEEDKDAFGLVCKRWLLVRRTNRHRLCARAGPLMLRKLAARFTHVIELDLSQSVSRSFYPGVTDADLAVVASGFDSLKVLRLHNCKGITDSGLKAVGEGHINLQLLDVSYCRKVTDKGLGAVADRCLSLKSLHVSGCKLLTNRFLVSLAKSCCDLEELVLNGCYNITDEGIENLVCGCNRIKILDLNKCIKVDYFGVAKISQFCSSTLKVLKLMDCWRVGDESVYALAQNCSSIETLVIGGCRDVSDESVKSLARLCGSTLKRLKMDWCPNISDSSVQFLFLHCECLEVLDIGCCAEVSDAAFFSLENGKAQLHLRMLKVSGCPKITVAGIHSLTQFCNVLEYLDVTSCPLISRESCIEASL…	425	2286	https://www.nature.com/articles/s41467-019-12607-6	http://cotton.hzau.edu.cn/EN/Download.htm
PlantKGA_88	Piperales	Piperaceae	Piper	nigrum	Piper nigrum	black pepper	胡椒	chromosome	Yes	基因	evmmodelPn161454	evmmodelPn1614541288xxPlantKGA_88	evm.model.Pn16.1454	L	partial	Pn3	26054469	26056754	-	Pfam	PF13516	Leucine Rich repeat	Leucine-rich repeat	188	211	SCCDLEELVLNGCYNITDEGIENL	0.62	MSALPSPAAGDDSTEAAVCINEFLEDDVLGDVLARLLSEEDKDAFGLVCKRWLLVRRTNRHRLCARAGPLMLRKLAARFTHVIELDLSQSVSRSFYPGVTDADLAVVASGFDSLKVLRLHNCKGITDSGLKAVGEGHINLQLLDVSYCRKVTDKGLGAVADRCLSLKSLHVSGCKLLTNRFLVSLAKSCCDLEELVLNGCYNITDEGIENLVCGCNRIKILDLNKCIKVDYFGVAKISQFCSSTLKVLKLMDCWRVGDESVYALAQNCSSIETLVIGGCRDVSDESVKSLARLCGSTLKRLKMDWCPNISDSSVQFLFLHCECLEVLDIGCCAEVSDAAFFSLENGKAQLHLRMLKVSGCPKITVAGIHSLTQFCNVLEYLDVTSCPLISRESCIEASL…	425	2286	https://www.nature.com/articles/s41467-019-12607-6	http://cotton.hzau.edu.cn/EN/Download.htm
PlantKGA_88	Piperales	Piperaceae	Piper	nigrum	Piper nigrum	black pepper	胡椒	chromosome	Yes	基因	evmmodelPn161461	evmmodelPn1614611288xxPlantKGA_88	evm.model.Pn16.1461	L	partial	Pn3	25984059	25985003	-	Pfam	PF13855	Leucine rich repeat	Leucine-rich repeat	118	178	SRLKALYLGVNQLTGSIPSSLGNLSSLEEMNLAGNNITGKIPNQLGSLSRLETLFLDGNQL	1.1e-09	MGVSCGRRHRRVTGLDFSSFNLSGTLSPYIGNLSFLRYIYLWNVQNEYRPRSERSPNLQGAIPSEIGRLYQLRRLDLSLNSFNGEIPLNLTNCLSLEEMDLSFNNITGKIPNQLGSLSRLKALYLGVNQLTGSIPSSLGNLSSLEEMNLAGNNITGKIPNQLGSLSRLETLFLDGNQLTGSIPSSLGNLSSLIYFDLSSNNLNGTIPDSIYNLSDVTYFGIDHNKLSGKLPTNLGMQLLPNLEYFNVHSNKLGGHIPASLANASNLVNLSLSHNEFRGFVPNFMGCNNKGLKGLDLRSNQLGSGGTNDDISQFI	314	945	https://www.nature.com/articles/s41467-019-12607-6	http://cotton.hzau.edu.cn/EN/Download.htm
PlantKGA_88	Piperales	Piperaceae	Piper	nigrum	Piper nigrum	black pepper	胡椒	chromosome	Yes	基因	evmmodelPn161461	evmmodelPn1614611288xxPlantKGA_88	evm.model.Pn16.1461	L	partial	Pn3	25984059	25985003	-	Pfam	PF00560	Leucine Rich Repeat	Leucine-rich repeat	95	117	SLEEMDLSFNNITGKIPNQLGSL	0.47	MGVSCGRRHRRVTGLDFSSFNLSGTLSPYIGNLSFLRYIYLWNVQNEYRPRSERSPNLQGAIPSEIGRLYQLRRLDLSLNSFNGEIPLNLTNCLSLEEMDLSFNNITGKIPNQLGSLSRLKALYLGVNQLTGSIPSSLGNLSSLEEMNLAGNNITGKIPNQLGSLSRLETLFLDGNQLTGSIPSSLGNLSSLIYFDLSSNNLNGTIPDSIYNLSDVTYFGIDHNKLSGKLPTNLGMQLLPNLEYFNVHSNKLGGHIPASLANASNLVNLSLSHNEFRGFVPNFMGCNNKGLKGLDLRSNQLGSGGTNDDISQFI	314	945	https://www.nature.com/articles/s41467-019-12607-6	http://cotton.hzau.edu.cn/EN/Download.htm
PlantKGA_88	Piperales	Piperaceae	Piper	nigrum	Piper nigrum	black pepper	胡椒	chromosome	Yes	基因	evmmodelPn161474	evmmodelPn1614741288xxPlantKGA_88	evm.model.Pn16.1474	L	partial	Pn3	25887616	25888395	-	Pfam	PF13516	Leucine Rich repeat	Leucine-rich repeat	17	30	SLTSLDLSSNHLNG	0.35	MITNSQEVFLHHLETSSLTSLDLSSNHLNGTLPIELGHLKSLEIFDVSSNQISGTIPDSIYNLSTIFVFAIDENKLSGKLPTNLGMQLLPNLIYFDGGSNKLGGHIPASLANASYLEYLSLSHNEFRGFVPNITGCNKKWGLWILYLRSNQLGSGGTNDDMSQFIHSLADCSPNLNELALGDNQLAGGIPDEIGKLNNLNVLHLTGNKITGKIPPALCNIAPLEGLYLGNNQLVGAIPQCLGDTLNLTHLDLSQNKLYY	259	780	https://www.nature.com/articles/s41467-019-12607-6	http://cotton.hzau.edu.cn/EN/Download.htm
PlantKGA_88	Piperales	Piperaceae	Piper	nigrum	Piper nigrum	black pepper	胡椒	chromosome	Yes	基因	evmmodelPn161474	evmmodelPn1614741288xxPlantKGA_88	evm.model.Pn16.1474	L	partial	Pn3	25887616	25888395	-	Pfam	PF13855	Leucine rich repeat	Leucine-rich repeat	173	233	PNLNELALGDNQLAGGIPDEIGKLNNLNVLHLTGNKITGKIPPALCNIAPLEGLYLGNNQL	1.6e-07	MITNSQEVFLHHLETSSLTSLDLSSNHLNGTLPIELGHLKSLEIFDVSSNQISGTIPDSIYNLSTIFVFAIDENKLSGKLPTNLGMQLLPNLIYFDGGSNKLGGHIPASLANASYLEYLSLSHNEFRGFVPNITGCNKKWGLWILYLRSNQLGSGGTNDDMSQFIHSLADCSPNLNELALGDNQLAGGIPDEIGKLNNLNVLHLTGNKITGKIPPALCNIAPLEGLYLGNNQLVGAIPQCLGDTLNLTHLDLSQNKLYY	259	780	https://www.nature.com/articles/s41467-019-12607-6	http://cotton.hzau.edu.cn/EN/Download.htm
PlantKGA_88	Piperales	Piperaceae	Piper	nigrum	Piper nigrum	black pepper	胡椒	chromosome	Yes	基因	evmmodelPn161477	evmmodelPn1614771288xxPlantKGA_88	evm.model.Pn16.1477	L	partial	Pn3	25861915	25865661	-	Pfam	PF00560	Leucine Rich Repeat	Leucine-rich repeat	202	222	RLRSLDLRGNSFSGEIPLNLT	0.83	AHDNLVHLPVRNDWGGKHQLFVKWKHIEAKAAAYYYHGLILDEGNTEQLHSMAVAALQAADDFLKESNRTCEAFNTAPPSSRCPPLWGAMKYLAEKIPKDASSKVRINRDLYSQENRWVCVQITIFNYDMAVLLKCGRRHRRVTGLDFSSFNLSGTLSNYIGNLSFLRYINLRNLQNEYRPPWERSPNLQGAIPSEIGRLYRLRSLDLRGNSFSGEIPLNLTSCLSLEEMHLFDNNITGKIPNQLGSLSRLKGLDLGGNQLTGSIPSSLGNLSSLTFLDLSSNNLNGTIPDSIYNLSEIKVFRIEHNKLSGKLPTNLGMQLLPNLRTFHGGSNKLGGHIPASLANASNLRYLSLSQNEFRGLVPNITGCNKILFTLDLRSNQLRSGGTNDDMSQFIPSL…	494	3747	https://www.nature.com/articles/s41467-019-12607-6	http://cotton.hzau.edu.cn/EN/Download.htm
PlantKGA_88	Piperales	Piperaceae	Piper	nigrum	Piper nigrum	black pepper	胡椒	chromosome	Yes	基因	evmmodelPn161477	evmmodelPn1614771288xxPlantKGA_88	evm.model.Pn16.1477	L	partial	Pn3	25861915	25865661	-	Pfam	PF13855	Leucine rich repeat	Leucine-rich repeat	226	285	SLEEMHLFDNNITGKIPNQLGSLSRLKGLDLGGNQLTGSIPSSLGNLSSLTFLDLSSNNL	1.2e-07	AHDNLVHLPVRNDWGGKHQLFVKWKHIEAKAAAYYYHGLILDEGNTEQLHSMAVAALQAADDFLKESNRTCEAFNTAPPSSRCPPLWGAMKYLAEKIPKDASSKVRINRDLYSQENRWVCVQITIFNYDMAVLLKCGRRHRRVTGLDFSSFNLSGTLSNYIGNLSFLRYINLRNLQNEYRPPWERSPNLQGAIPSEIGRLYRLRSLDLRGNSFSGEIPLNLTSCLSLEEMHLFDNNITGKIPNQLGSLSRLKGLDLGGNQLTGSIPSSLGNLSSLTFLDLSSNNLNGTIPDSIYNLSEIKVFRIEHNKLSGKLPTNLGMQLLPNLRTFHGGSNKLGGHIPASLANASNLRYLSLSQNEFRGLVPNITGCNKILFTLDLRSNQLRSGGTNDDMSQFIPSL…	494	3747	https://www.nature.com/articles/s41467-019-12607-6	http://cotton.hzau.edu.cn/EN/Download.htm
PlantKGA_88	Piperales	Piperaceae	Piper	nigrum	Piper nigrum	black pepper	胡椒	chromosome	Yes	基因	evmmodelPn161477	evmmodelPn1614771288xxPlantKGA_88	evm.model.Pn16.1477	L	partial	Pn3	25861915	25865661	-	Pfam	PF13855	Leucine rich repeat	Leucine-rich repeat	404	464	PNLYKLALGDNQLAGSIPDEIGKLNNLEVLHLTRNKITGKIPPALCNITLLNELYLGNNQL	4.6e-09	AHDNLVHLPVRNDWGGKHQLFVKWKHIEAKAAAYYYHGLILDEGNTEQLHSMAVAALQAADDFLKESNRTCEAFNTAPPSSRCPPLWGAMKYLAEKIPKDASSKVRINRDLYSQENRWVCVQITIFNYDMAVLLKCGRRHRRVTGLDFSSFNLSGTLSNYIGNLSFLRYINLRNLQNEYRPPWERSPNLQGAIPSEIGRLYRLRSLDLRGNSFSGEIPLNLTSCLSLEEMHLFDNNITGKIPNQLGSLSRLKGLDLGGNQLTGSIPSSLGNLSSLTFLDLSSNNLNGTIPDSIYNLSEIKVFRIEHNKLSGKLPTNLGMQLLPNLRTFHGGSNKLGGHIPASLANASNLRYLSLSQNEFRGLVPNITGCNKILFTLDLRSNQLRSGGTNDDMSQFIPSL…	494	3747	https://www.nature.com/articles/s41467-019-12607-6	http://cotton.hzau.edu.cn/EN/Download.htm
PlantKGA_88	Piperales	Piperaceae	Piper	nigrum	Piper nigrum	black pepper	胡椒	chromosome	Yes	基因	evmmodelPn161481	evmmodelPn1614811288xxPlantKGA_88	evm.model.Pn16.1481	L	partial	Pn3	25831812	25832552	-	Pfam	PF13855	Leucine rich repeat	Leucine-rich repeat	2	62	SRLKTLYLHHNQLIGSIPSSLGNLSALTHLYLGSNNLNGTIPDSIYNLSEIRDFAIGRNKL	2.7e-08	MSRLKTLYLHHNQLIGSIPSSLGNLSALTHLYLGSNNLNGTIPDSIYNLSEIRDFAIGRNKLSGKLPTNLGMQLLPNLDFFFGGSNKLEGHIPVSLANASNLEILSLSHNEFRGYVPNFMGCNSNKWGLLILDLRSNELGSGGTNDDMSQFIHSLANCSSKLQQLALGDNQLSGGIPDEIGKLNNLWVLHLTGNKITGKIPPALCNITLLNELYLGNNQLVGAIPQCLGDTLNLTYIDLSQNKLYY	246	741	https://www.nature.com/articles/s41467-019-12607-6	http://cotton.hzau.edu.cn/EN/Download.htm
PlantKGA_88	Piperales	Piperaceae	Piper	nigrum	Piper nigrum	black pepper	胡椒	chromosome	Yes	基因	evmmodelPn161481	evmmodelPn1614811288xxPlantKGA_88	evm.model.Pn16.1481	L	partial	Pn3	25831812	25832552	-	Pfam	PF00560	Leucine Rich Repeat	Leucine-rich repeat	185	206	NLWVLHLTGNKITGKIPPALCN	1.7	MSRLKTLYLHHNQLIGSIPSSLGNLSALTHLYLGSNNLNGTIPDSIYNLSEIRDFAIGRNKLSGKLPTNLGMQLLPNLDFFFGGSNKLEGHIPVSLANASNLEILSLSHNEFRGYVPNFMGCNSNKWGLLILDLRSNELGSGGTNDDMSQFIHSLANCSSKLQQLALGDNQLSGGIPDEIGKLNNLWVLHLTGNKITGKIPPALCNITLLNELYLGNNQLVGAIPQCLGDTLNLTYIDLSQNKLYY	246	741	https://www.nature.com/articles/s41467-019-12607-6	http://cotton.hzau.edu.cn/EN/Download.htm
PlantKGA_88	Piperales	Piperaceae	Piper	nigrum	Piper nigrum	black pepper	胡椒	chromosome	Yes	基因	evmmodelPn161508	evmmodelPn1615081288xxPlantKGA_88	evm.model.Pn16.1508	L	partial	Pn3	25546465	25547043	-	Pfam	PF00560	Leucine Rich Repeat	Leucine-rich repeat	20	41	LRRLDLSGNSFNGEIPLNLTNC	0.53	MEANNLQGGIPSEIGRLYWLRRLDLSGNSFNGEIPLNLTNCLSLEGMDLGHNNIIRKIPYQLGSFSRLKALGLCGNQLTGSIPSSLGNLSSLTSLDLGSNNLQGTIPSEIGRLYQLCVLDLSGNSLSGEIPLNLTNCLSLDEMDLSKNNIKGKIPNQLGSLPSLKALGRYENQLTGSIPCHLETSLLLLLFV	192	579	https://www.nature.com/articles/s41467-019-12607-6	http://cotton.hzau.edu.cn/EN/Download.htm
PlantKGA_88	Piperales	Piperaceae	Piper	nigrum	Piper nigrum	black pepper	胡椒	chromosome	Yes	基因	evmmodelPn161508	evmmodelPn1615081288xxPlantKGA_88	evm.model.Pn16.1508	L	partial	Pn3	25546465	25547043	-	Pfam	PF13855	Leucine rich repeat	Leucine-rich repeat	66	126	SRLKALGLCGNQLTGSIPSSLGNLSSLTSLDLGSNNLQGTIPSEIGRLYQLCVLDLSGNSL	1.1e-09	MEANNLQGGIPSEIGRLYWLRRLDLSGNSFNGEIPLNLTNCLSLEGMDLGHNNIIRKIPYQLGSFSRLKALGLCGNQLTGSIPSSLGNLSSLTSLDLGSNNLQGTIPSEIGRLYQLCVLDLSGNSLSGEIPLNLTNCLSLDEMDLSKNNIKGKIPNQLGSLPSLKALGRYENQLTGSIPCHLETSLLLLLFV	192	579	https://www.nature.com/articles/s41467-019-12607-6	http://cotton.hzau.edu.cn/EN/Download.htm
PlantKGA_88	Piperales	Piperaceae	Piper	nigrum	Piper nigrum	black pepper	胡椒	chromosome	Yes	基因	evmmodelPn161509	evmmodelPn1615091288xxPlantKGA_88	evm.model.Pn16.1509	L	partial	Pn3	25545740	25546135	-	Pfam	PF00560	Leucine Rich Repeat	Leucine-rich repeat	41	63	NLQRLVLGDNQLSGGIPDEIGKL	0.91	MGCNNKEGLQSLDLRSNQLGSKGTNDDMSQIIHSLANCSRNLQRLVLGDNQLSGGIPDEIGKLNNLWILHLTGSKIDGKIPPALCNIARLKQLYLGKNTLVGAIPECLRDTLNLSHLDLSQNKLSGGDMTS	131	396	https://www.nature.com/articles/s41467-019-12607-6	http://cotton.hzau.edu.cn/EN/Download.htm
PlantKGA_88	Piperales	Piperaceae	Piper	nigrum	Piper nigrum	black pepper	胡椒	chromosome	Yes	基因	evmmodelPn161509	evmmodelPn1615091288xxPlantKGA_88	evm.model.Pn16.1509	L	partial	Pn3	25545740	25546135	-	Pfam	PF13516	Leucine Rich repeat	Leucine-rich repeat	9	23	LQSLDLRSNQLGSKG	0.17	MGCNNKEGLQSLDLRSNQLGSKGTNDDMSQIIHSLANCSRNLQRLVLGDNQLSGGIPDEIGKLNNLWILHLTGSKIDGKIPPALCNIARLKQLYLGKNTLVGAIPECLRDTLNLSHLDLSQNKLSGGDMTS	131	396	https://www.nature.com/articles/s41467-019-12607-6	http://cotton.hzau.edu.cn/EN/Download.htm
PlantKGA_88	Piperales	Piperaceae	Piper	nigrum	Piper nigrum	black pepper	胡椒	chromosome	Yes	基因	evmmodelPn161510	evmmodelPn1615101288xxPlantKGA_88	evm.model.Pn16.1510	L	partial	Pn3	25523266	25523843	-	Pfam	PF00560	Leucine Rich Repeat	Leucine-rich repeat	174	187	NLTHLDLSQNKLLG	1	KNKLSGRLPTNLGVELLPNLEYFLGDSNKLGGHIPVSLANASNLVYLSLSHNEFRRFVPNFLGCNNKEGLLYLDLRSYQLGSGGMNDEMSQLIHSLANCSRNLQRLILGDNQLSGGIPDEIGKLNNLWALHLTGNKIAGKIPPTLCNISPLEELYLGNNQLVGAIPECLGDTLNLTHLDLSQNKLLGGDVA	191	578	https://www.nature.com/articles/s41467-019-12607-6	http://cotton.hzau.edu.cn/EN/Download.htm
PlantKGA_88	Piperales	Piperaceae	Piper	nigrum	Piper nigrum	black pepper	胡椒	chromosome	Yes	基因	evmmodelPn161510	evmmodelPn1615101288xxPlantKGA_88	evm.model.Pn16.1510	L	partial	Pn3	25523266	25523843	-	Pfam	PF00560	Leucine Rich Repeat	Leucine-rich repeat	102	124	NLQRLILGDNQLSGGIPDEIGKL	1.4	KNKLSGRLPTNLGVELLPNLEYFLGDSNKLGGHIPVSLANASNLVYLSLSHNEFRRFVPNFLGCNNKEGLLYLDLRSYQLGSGGMNDEMSQLIHSLANCSRNLQRLILGDNQLSGGIPDEIGKLNNLWALHLTGNKIAGKIPPTLCNISPLEELYLGNNQLVGAIPECLGDTLNLTHLDLSQNKLLGGDVA	191	578	https://www.nature.com/articles/s41467-019-12607-6	http://cotton.hzau.edu.cn/EN/Download.htm
PlantKGA_88	Piperales	Piperaceae	Piper	nigrum	Piper nigrum	black pepper	胡椒	chromosome	Yes	基因	evmmodelPn161510	evmmodelPn1615101288xxPlantKGA_88	evm.model.Pn16.1510	L	partial	Pn3	25523266	25523843	-	Pfam	PF00560	Leucine Rich Repeat	Leucine-rich repeat	151	169	LEELYLGNNQLVGAIPECL	1.5	KNKLSGRLPTNLGVELLPNLEYFLGDSNKLGGHIPVSLANASNLVYLSLSHNEFRRFVPNFLGCNNKEGLLYLDLRSYQLGSGGMNDEMSQLIHSLANCSRNLQRLILGDNQLSGGIPDEIGKLNNLWALHLTGNKIAGKIPPTLCNISPLEELYLGNNQLVGAIPECLGDTLNLTHLDLSQNKLLGGDVA	191	578	https://www.nature.com/articles/s41467-019-12607-6	http://cotton.hzau.edu.cn/EN/Download.htm
PlantKGA_88	Piperales	Piperaceae	Piper	nigrum	Piper nigrum	black pepper	胡椒	chromosome	Yes	基因	evmmodelPn161511	evmmodelPn1615111288xxPlantKGA_88	evm.model.Pn16.1511	L	partial	Pn3	25507340	25508462	-	Pfam	PF13855	Leucine rich repeat	Leucine-rich repeat	125	185	SRLTTLHLFFNHLTGSIPSSLGNLSSLTLLDLGSNNLNGTIPDSIYNLSEITELGIYQNKL	8.1e-08	SRHRRVTGLDFSWYFNLSGALSPHIGNLSFLRYINFIENNLQGAIPSEIGRLYRLRILDLPLNSFSGVIPLNLTNCISLEEMNLAGNKITGKIPNQLGSLSSLKELILSGNQLTGSIPSSLGNLSRLTTLHLFFNHLTGSIPSSLGNLSSLTLLDLGSNNLNGTIPDSIYNLSEITELGIYQNKLSGKLPTNLDMELLPNLEYFYGGSNKLGGHIPVSLANASNLVYLSLPHNEFRGFVPNFMGCNLNKWGLQILDLRFNQLGSGGTNDDISQFIHSLASCTRNLQKLLLGGNQLSGSIPDEIRKLNILRVLHLTGNKIAGKIPSALCNIDPLEELLLGNNQLVGAIPECLGDTLNLTHFDLSQNNLLGGDLA	373	1123	https://www.nature.com/articles/s41467-019-12607-6	http://cotton.hzau.edu.cn/EN/Download.htm
PlantKGA_88	Piperales	Piperaceae	Piper	nigrum	Piper nigrum	black pepper	胡椒	chromosome	Yes	基因	evmmodelPn161511	evmmodelPn1615111288xxPlantKGA_88	evm.model.Pn16.1511	L	partial	Pn3	25507340	25508462	-	Pfam	PF13855	Leucine rich repeat	Leucine-rich repeat	54	113	RLRILDLPLNSFSGVIPLNLTNCISLEEMNLAGNKITGKIPNQLGSLSSLKELILSGNQL	2.6e-08	SRHRRVTGLDFSWYFNLSGALSPHIGNLSFLRYINFIENNLQGAIPSEIGRLYRLRILDLPLNSFSGVIPLNLTNCISLEEMNLAGNKITGKIPNQLGSLSSLKELILSGNQLTGSIPSSLGNLSRLTTLHLFFNHLTGSIPSSLGNLSSLTLLDLGSNNLNGTIPDSIYNLSEITELGIYQNKLSGKLPTNLDMELLPNLEYFYGGSNKLGGHIPVSLANASNLVYLSLPHNEFRGFVPNFMGCNLNKWGLQILDLRFNQLGSGGTNDDISQFIHSLASCTRNLQKLLLGGNQLSGSIPDEIRKLNILRVLHLTGNKIAGKIPSALCNIDPLEELLLGNNQLVGAIPECLGDTLNLTHFDLSQNNLLGGDLA	373	1123	https://www.nature.com/articles/s41467-019-12607-6	http://cotton.hzau.edu.cn/EN/Download.htm
PlantKGA_88	Piperales	Piperaceae	Piper	nigrum	Piper nigrum	black pepper	胡椒	chromosome	Yes	基因	evmmodelPn161540	evmmodelPn1615401288xxPlantKGA_88	evm.model.Pn16.1540	L	partial	Pn3	25290510	25292543	-	Pfam	PF13516	Leucine Rich repeat	Leucine-rich repeat	249	264	NFLNELHLTGNKITGK	1.3	MSPSDPPAECRSSATPTPSSPPLTTTPRRNSAAEIGIWKIPNQLGSLLRLEALDLGGNRLTGSIPSSLGNLSSLTWLDLRYNNLNGTLPIELGHLKSLSTFRVSSNQISGTIPDSIFNLSDIKYFVIAQNKLSGKLPTNLGMQLLPNLNYFYGGSNKLGGHIPVSLANASNLVELSLFHNEFRGFVPNFMGRSLRHLDLRSNQLGSGGTNDDMSQFIHSLANSSLYLQRVALGDNQLSGGIPDEIGKLNFLNELHLTGNKITGKIPPALCNIAPLEGLYLGNNTLVGAIPECLGDTLNLTHLDLSQNKLLGGDMA	315	2034	https://www.nature.com/articles/s41467-019-12607-6	http://cotton.hzau.edu.cn/EN/Download.htm
PlantKGA_88	Piperales	Piperaceae	Piper	nigrum	Piper nigrum	black pepper	胡椒	chromosome	Yes	基因	evmmodelPn161540	evmmodelPn1615401288xxPlantKGA_88	evm.model.Pn16.1540	L	partial	Pn3	25290510	25292543	-	Pfam	PF13516	Leucine Rich repeat	Leucine-rich repeat	192	208	RSLRHLDLRSNQLGSGG	0.092	MSPSDPPAECRSSATPTPSSPPLTTTPRRNSAAEIGIWKIPNQLGSLLRLEALDLGGNRLTGSIPSSLGNLSSLTWLDLRYNNLNGTLPIELGHLKSLSTFRVSSNQISGTIPDSIFNLSDIKYFVIAQNKLSGKLPTNLGMQLLPNLNYFYGGSNKLGGHIPVSLANASNLVELSLFHNEFRGFVPNFMGRSLRHLDLRSNQLGSGGTNDDMSQFIHSLANSSLYLQRVALGDNQLSGGIPDEIGKLNFLNELHLTGNKITGKIPPALCNIAPLEGLYLGNNTLVGAIPECLGDTLNLTHLDLSQNKLLGGDMA	315	2034	https://www.nature.com/articles/s41467-019-12607-6	http://cotton.hzau.edu.cn/EN/Download.htm
PlantKGA_88	Piperales	Piperaceae	Piper	nigrum	Piper nigrum	black pepper	胡椒	chromosome	Yes	基因	evmmodelPn161540	evmmodelPn1615401288xxPlantKGA_88	evm.model.Pn16.1540	L	partial	Pn3	25290510	25292543	-	Pfam	PF13855	Leucine rich repeat	Leucine-rich repeat	49	108	RLEALDLGGNRLTGSIPSSLGNLSSLTWLDLRYNNLNGTLPIELGHLKSLSTFRVSSNQI	4.1e-09	MSPSDPPAECRSSATPTPSSPPLTTTPRRNSAAEIGIWKIPNQLGSLLRLEALDLGGNRLTGSIPSSLGNLSSLTWLDLRYNNLNGTLPIELGHLKSLSTFRVSSNQISGTIPDSIFNLSDIKYFVIAQNKLSGKLPTNLGMQLLPNLNYFYGGSNKLGGHIPVSLANASNLVELSLFHNEFRGFVPNFMGRSLRHLDLRSNQLGSGGTNDDMSQFIHSLANSSLYLQRVALGDNQLSGGIPDEIGKLNFLNELHLTGNKITGKIPPALCNIAPLEGLYLGNNTLVGAIPECLGDTLNLTHLDLSQNKLLGGDMA	315	2034	https://www.nature.com/articles/s41467-019-12607-6	http://cotton.hzau.edu.cn/EN/Download.htm
PlantKGA_88	Piperales	Piperaceae	Piper	nigrum	Piper nigrum	black pepper	胡椒	chromosome	Yes	基因	evmmodelPn161579	evmmodelPn1615791288xxPlantKGA_88	evm.model.Pn16.1579	L	partial	Pn3	24982551	24983714	+	Pfam	PF13855	Leucine rich repeat	Leucine-rich repeat	21	80	SLKELNLYGNQLTGSIPSSLGNLSSLEEMDLSRNNITGKIPNQLGSLLRLKTLRLHGSQL	6e-08	MDLGVNHIIGKIPNQLGSLSSLKELNLYGNQLTGSIPSSLGNLSSLEEMDLSRNNITGKIPNQLGSLLRLKTLRLHGSQLSGSIPSSLGNLSSLEVMDFSNNNKIGKIPNQLGSLSRLMALSLDGNQLTGSIPSSLGNLSSLTYLLLGSNSLNEALPIELGHLKSLAIFDVSSNQISGTIPNSIYNLSTVKAFVIDQNKLSGKLPTNLGMELLPNLEIFNVSSNKLGGHIPVSLANASNLVGLSLSHNEFRGFLPNFMGCNDKEGLLYLDLRSNQLGSGGKNDDMSQFIHSLANCSRNLQLLALGDNQLSGGIPDEIGKLNVLSVLHLTGNKISGKIPPALCNIAPLEELFLGNNTLVGAIPECLGDTLNLIGLDLSHNKLLGGNMA	387	1164	https://www.nature.com/articles/s41467-019-12607-6	http://cotton.hzau.edu.cn/EN/Download.htm
PlantKGA_88	Piperales	Piperaceae	Piper	nigrum	Piper nigrum	black pepper	胡椒	chromosome	Yes	基因	evmmodelPn161579	evmmodelPn1615791288xxPlantKGA_88	evm.model.Pn16.1579	L	partial	Pn3	24982551	24983714	+	Pfam	PF13855	Leucine rich repeat	Leucine-rich repeat	116	176	SRLMALSLDGNQLTGSIPSSLGNLSSLTYLLLGSNSLNEALPIELGHLKSLAIFDVSSNQI	2.7e-07	MDLGVNHIIGKIPNQLGSLSSLKELNLYGNQLTGSIPSSLGNLSSLEEMDLSRNNITGKIPNQLGSLLRLKTLRLHGSQLSGSIPSSLGNLSSLEVMDFSNNNKIGKIPNQLGSLSRLMALSLDGNQLTGSIPSSLGNLSSLTYLLLGSNSLNEALPIELGHLKSLAIFDVSSNQISGTIPNSIYNLSTVKAFVIDQNKLSGKLPTNLGMELLPNLEIFNVSSNKLGGHIPVSLANASNLVGLSLSHNEFRGFLPNFMGCNDKEGLLYLDLRSNQLGSGGKNDDMSQFIHSLANCSRNLQLLALGDNQLSGGIPDEIGKLNVLSVLHLTGNKISGKIPPALCNIAPLEELFLGNNTLVGAIPECLGDTLNLIGLDLSHNKLLGGNMA	387	1164	https://www.nature.com/articles/s41467-019-12607-6	http://cotton.hzau.edu.cn/EN/Download.htm
PlantKGA_88	Piperales	Piperaceae	Piper	nigrum	Piper nigrum	black pepper	胡椒	chromosome	Yes	基因	evmmodelPn161602	evmmodelPn1616021288xxPlantKGA_88	evm.model.Pn16.1602	L	partial	Pn3	24759520	24760584	-	Pfam	PF13855	Leucine rich repeat	Leucine-rich repeat	14	73	TLKTLRLDGNQLTGIIPSSLGNLSSLKEMDLRNNDITGEIPNQLGSLSRIKALYLYGNHL	2.7e-11	MTGKIPNQLGSLSTLKTLRLDGNQLTGIIPSSLGNLSSLKEMDLRNNDITGEIPNQLGSLSRIKALYLYGNHLTGSIPSSLGNLSSLEEIDLSRNYLTGKIPNQLGSLSRVKTLYRNQLTRSIPSSLGHLSSLTSLDLSYNNLNGTIPDSIYNLSDITEFDIEHNKLSGKLPTNLGIQLLPNLQFFIGGSNKLGGHIPVSLANASKLEFLSLSYNELRGFVPNFMGCNNKWGLLYLDLRSNQLGSGGTNDDMSQFIHSLANSSRNLQTLSLGGNQLSGGIPDEIGKLNSLWVLHLTGNKIAGKIPLALCSIAPLKGLYLGNNQLVGEIPDCLGDTLNLTHLDLSQNKLLGGDMA	354	1065	https://www.nature.com/articles/s41467-019-12607-6	http://cotton.hzau.edu.cn/EN/Download.htm
PlantKGA_88	Piperales	Piperaceae	Piper	nigrum	Piper nigrum	black pepper	胡椒	chromosome	Yes	基因	evmmodelPn161602	evmmodelPn1616021288xxPlantKGA_88	evm.model.Pn16.1602	L	partial	Pn3	24759520	24760584	-	Pfam	PF13855	Leucine rich repeat	Leucine-rich repeat	114	167	LYRNQLTRSIPSSLGHLSSLTSLDLSYNNLNGTIPDSIYNLSDITEFDIEHNKL	6.4e-08	MTGKIPNQLGSLSTLKTLRLDGNQLTGIIPSSLGNLSSLKEMDLRNNDITGEIPNQLGSLSRIKALYLYGNHLTGSIPSSLGNLSSLEEIDLSRNYLTGKIPNQLGSLSRVKTLYRNQLTRSIPSSLGHLSSLTSLDLSYNNLNGTIPDSIYNLSDITEFDIEHNKLSGKLPTNLGIQLLPNLQFFIGGSNKLGGHIPVSLANASKLEFLSLSYNELRGFVPNFMGCNNKWGLLYLDLRSNQLGSGGTNDDMSQFIHSLANSSRNLQTLSLGGNQLSGGIPDEIGKLNSLWVLHLTGNKIAGKIPLALCSIAPLKGLYLGNNQLVGEIPDCLGDTLNLTHLDLSQNKLLGGDMA	354	1065	https://www.nature.com/articles/s41467-019-12607-6	http://cotton.hzau.edu.cn/EN/Download.htm
PlantKGA_88	Piperales	Piperaceae	Piper	nigrum	Piper nigrum	black pepper	胡椒	chromosome	Yes	基因	evmmodelPn161602	evmmodelPn1616021288xxPlantKGA_88	evm.model.Pn16.1602	L	partial	Pn3	24759520	24760584	-	Pfam	PF00560	Leucine Rich Repeat	Leucine-rich repeat	265	287	NLQTLSLGGNQLSGGIPDEIGKL	0.38	MTGKIPNQLGSLSTLKTLRLDGNQLTGIIPSSLGNLSSLKEMDLRNNDITGEIPNQLGSLSRIKALYLYGNHLTGSIPSSLGNLSSLEEIDLSRNYLTGKIPNQLGSLSRVKTLYRNQLTRSIPSSLGHLSSLTSLDLSYNNLNGTIPDSIYNLSDITEFDIEHNKLSGKLPTNLGIQLLPNLQFFIGGSNKLGGHIPVSLANASKLEFLSLSYNELRGFVPNFMGCNNKWGLLYLDLRSNQLGSGGTNDDMSQFIHSLANSSRNLQTLSLGGNQLSGGIPDEIGKLNSLWVLHLTGNKIAGKIPLALCSIAPLKGLYLGNNQLVGEIPDCLGDTLNLTHLDLSQNKLLGGDMA	354	1065	https://www.nature.com/articles/s41467-019-12607-6	http://cotton.hzau.edu.cn/EN/Download.htm
PlantKGA_88	Piperales	Piperaceae	Piper	nigrum	Piper nigrum	black pepper	胡椒	chromosome	Yes	基因	evmmodelPn161602	evmmodelPn1616021288xxPlantKGA_88	evm.model.Pn16.1602	L	partial	Pn3	24759520	24760584	-	Pfam	PF00560	Leucine Rich Repeat	Leucine-rich repeat	86	108	SLEEIDLSRNYLTGKIPNQLGSL	0.099	MTGKIPNQLGSLSTLKTLRLDGNQLTGIIPSSLGNLSSLKEMDLRNNDITGEIPNQLGSLSRIKALYLYGNHLTGSIPSSLGNLSSLEEIDLSRNYLTGKIPNQLGSLSRVKTLYRNQLTRSIPSSLGHLSSLTSLDLSYNNLNGTIPDSIYNLSDITEFDIEHNKLSGKLPTNLGIQLLPNLQFFIGGSNKLGGHIPVSLANASKLEFLSLSYNELRGFVPNFMGCNNKWGLLYLDLRSNQLGSGGTNDDMSQFIHSLANSSRNLQTLSLGGNQLSGGIPDEIGKLNSLWVLHLTGNKIAGKIPLALCSIAPLKGLYLGNNQLVGEIPDCLGDTLNLTHLDLSQNKLLGGDMA	354	1065	https://www.nature.com/articles/s41467-019-12607-6	http://cotton.hzau.edu.cn/EN/Download.htm
PlantKGA_88	Piperales	Piperaceae	Piper	nigrum	Piper nigrum	black pepper	胡椒	chromosome	Yes	基因	evmmodelPn161610	evmmodelPn1616101288xxPlantKGA_88	evm.model.Pn16.1610	L	partial	Pn3	24696841	24697963	-	Pfam	PF00560	Leucine Rich Repeat	Leucine-rich repeat	58	80	SLKELILSGNQLTGSIPSSLGNL	0.18	HRHRRVTGLDFSWYFNLSGALSPHIGNLSFLRHINFIENNLQGVIPRKIPNQLGSLSSLKELILSGNQLTGSIPSSLGNLSRLTTLHLFLNHLTGSIPSSLGNLSSLTLLDLGSNNLNGTIPDSIYNLSEITELGIYQNKLSGKLPTNLDMELLPNLEYFYGGSNKLGGHIPVSLANASNLVYLSLPHNEFRGFVPNFMGCNHNKWGLQILDLRFNQLGSGGTNDDISQFIHSLASCTRNLQKLLHGGNQLSGGIPDEIRKLNILRVLHLTGNKIAGKIPPALCNIDPLEELLLGNNQLVGAIPECLGDTLNLTHFDLSQNKLLGGDLA	329	1123	https://www.nature.com/articles/s41467-019-12607-6	http://cotton.hzau.edu.cn/EN/Download.htm
PlantKGA_88	Piperales	Piperaceae	Piper	nigrum	Piper nigrum	black pepper	胡椒	chromosome	Yes	基因	evmmodelPn161610	evmmodelPn1616101288xxPlantKGA_88	evm.model.Pn16.1610	L	partial	Pn3	24696841	24697963	-	Pfam	PF13855	Leucine rich repeat	Leucine-rich repeat	81	141	SRLTTLHLFLNHLTGSIPSSLGNLSSLTLLDLGSNNLNGTIPDSIYNLSEITELGIYQNKL	8.7e-07	HRHRRVTGLDFSWYFNLSGALSPHIGNLSFLRHINFIENNLQGVIPRKIPNQLGSLSSLKELILSGNQLTGSIPSSLGNLSRLTTLHLFLNHLTGSIPSSLGNLSSLTLLDLGSNNLNGTIPDSIYNLSEITELGIYQNKLSGKLPTNLDMELLPNLEYFYGGSNKLGGHIPVSLANASNLVYLSLPHNEFRGFVPNFMGCNHNKWGLQILDLRFNQLGSGGTNDDISQFIHSLASCTRNLQKLLHGGNQLSGGIPDEIRKLNILRVLHLTGNKIAGKIPPALCNIDPLEELLLGNNQLVGAIPECLGDTLNLTHFDLSQNKLLGGDLA	329	1123	https://www.nature.com/articles/s41467-019-12607-6	http://cotton.hzau.edu.cn/EN/Download.htm
PlantKGA_88	Piperales	Piperaceae	Piper	nigrum	Piper nigrum	black pepper	胡椒	chromosome	Yes	基因	evmmodelPn161623	evmmodelPn1616231288xxPlantKGA_88	evm.model.Pn16.1623	L	partial	Pn3	24557989	24559383	-	Pfam	PF13855	Leucine rich repeat	Leucine-rich repeat	20	80	SRLKTLYLDHNQLTGSIPSSLGNLSSLEVMDFSNNNITRKIPNQLSSLSRLKTLYLKRNQL	7.1e-12	MDLSGNIIIGKIPYQLGCLSRLKTLYLDHNQLTGSIPSSLGNLSSLEVMDFSNNNITRKIPNQLSSLSRLKTLYLKRNQLTGSIPSSLGNLSSLKEIDLGFNNITGEIPNQLGSLSRLETLRLHGSQPSGSIPSSLGNLSSLEVMDFSNNNITRKIPNQLGSLSRLKTLYLERNQLTGSIPSSLGNLSSLEEMDLGFNNITGEIPNQLGSLSRLKTLNLYVNQLTGSIPSSLGNLSSLISLDLASNNLNGTLPIELGHLKSLASFDVNSNQISGTIPDSIYNLSDITEFRIDQNKLSGKLPTNLGMELLPNLEYFYGDSNKLGGHIPVSLANASNLGYLSLSHNEFRGFVPNFMGCNNKEGLLYLDLRSNQLGSGGTNDDMSQFIPSLANCSRNLYRLA…	464	1395	https://www.nature.com/articles/s41467-019-12607-6	http://cotton.hzau.edu.cn/EN/Download.htm
PlantKGA_88	Piperales	Piperaceae	Piper	nigrum	Piper nigrum	black pepper	胡椒	chromosome	Yes	基因	evmmodelPn161623	evmmodelPn1616231288xxPlantKGA_88	evm.model.Pn16.1623	L	partial	Pn3	24557989	24559383	-	Pfam	PF13855	Leucine rich repeat	Leucine-rich repeat	164	224	SRLKTLYLERNQLTGSIPSSLGNLSSLEEMDLGFNNITGEIPNQLGSLSRLKTLNLYVNQL	3.7e-08	MDLSGNIIIGKIPYQLGCLSRLKTLYLDHNQLTGSIPSSLGNLSSLEVMDFSNNNITRKIPNQLSSLSRLKTLYLKRNQLTGSIPSSLGNLSSLKEIDLGFNNITGEIPNQLGSLSRLETLRLHGSQPSGSIPSSLGNLSSLEVMDFSNNNITRKIPNQLGSLSRLKTLYLERNQLTGSIPSSLGNLSSLEEMDLGFNNITGEIPNQLGSLSRLKTLNLYVNQLTGSIPSSLGNLSSLISLDLASNNLNGTLPIELGHLKSLASFDVNSNQISGTIPDSIYNLSDITEFRIDQNKLSGKLPTNLGMELLPNLEYFYGDSNKLGGHIPVSLANASNLGYLSLSHNEFRGFVPNFMGCNNKEGLLYLDLRSNQLGSGGTNDDMSQFIPSLANCSRNLYRLA…	464	1395	https://www.nature.com/articles/s41467-019-12607-6	http://cotton.hzau.edu.cn/EN/Download.htm
PlantKGA_88	Piperales	Piperaceae	Piper	nigrum	Piper nigrum	black pepper	胡椒	chromosome	Yes	基因	evmmodelPn161623	evmmodelPn1616231288xxPlantKGA_88	evm.model.Pn16.1623	L	partial	Pn3	24557989	24559383	-	Pfam	PF13516	Leucine Rich repeat	Leucine-rich repeat	92	107	SSLKEIDLGFNNITGE	0.43	MDLSGNIIIGKIPYQLGCLSRLKTLYLDHNQLTGSIPSSLGNLSSLEVMDFSNNNITRKIPNQLSSLSRLKTLYLKRNQLTGSIPSSLGNLSSLKEIDLGFNNITGEIPNQLGSLSRLETLRLHGSQPSGSIPSSLGNLSSLEVMDFSNNNITRKIPNQLGSLSRLKTLYLERNQLTGSIPSSLGNLSSLEEMDLGFNNITGEIPNQLGSLSRLKTLNLYVNQLTGSIPSSLGNLSSLISLDLASNNLNGTLPIELGHLKSLASFDVNSNQISGTIPDSIYNLSDITEFRIDQNKLSGKLPTNLGMELLPNLEYFYGDSNKLGGHIPVSLANASNLGYLSLSHNEFRGFVPNFMGCNNKEGLLYLDLRSNQLGSGGTNDDMSQFIPSLANCSRNLYRLA…	464	1395	https://www.nature.com/articles/s41467-019-12607-6	http://cotton.hzau.edu.cn/EN/Download.htm
PlantKGA_88	Piperales	Piperaceae	Piper	nigrum	Piper nigrum	black pepper	胡椒	chromosome	Yes	基因	evmmodelPn161624	evmmodelPn1616241288xxPlantKGA_88	evm.model.Pn16.1624	L	partial	Pn3	24545047	24545982	-	Pfam	PF00560	Leucine Rich Repeat	Leucine-rich repeat	246	267	NLRVLHLTGNKIAGKIPPALCN	0.3	MNNLQGAIPSEIGRLYWLRRLDLRFNSFSGEIPLNLTNCRSLEEMNLGVNNITGKIPNQLGSLSMLKALSLDRNQLTGSIPSSLGNLSSLTSLDLSSNHLNGTIPDSIYNLSDITEFGIDKNKLSGKLPTNLGMQLLPNLKKFWGDSNKLGGHIPVSLANASNLEFLSLSHNEFSGFVPNFMGCNNKWGLQVFDLRSNQLGSRGTNDDMSQFIHSLANCSRNLQILALGDNQLSGGIPDEIGKLKNLRVLHLTGNKIAGKIPPALCNIAPLEGLYLGNNQMVGAIPECLGYALNLNGLDLSQNKLLGGDMA	311	936	https://www.nature.com/articles/s41467-019-12607-6	http://cotton.hzau.edu.cn/EN/Download.htm
PlantKGA_88	Piperales	Piperaceae	Piper	nigrum	Piper nigrum	black pepper	胡椒	chromosome	Yes	基因	evmmodelPn161624	evmmodelPn1616241288xxPlantKGA_88	evm.model.Pn16.1624	L	partial	Pn3	24545047	24545982	-	Pfam	PF13855	Leucine rich repeat	Leucine-rich repeat	66	124	LKALSLDRNQLTGSIPSSLGNLSSLTSLDLSSNHLNGTIPDSIYNLSDITEFGIDKNKL	1.3e-07	MNNLQGAIPSEIGRLYWLRRLDLRFNSFSGEIPLNLTNCRSLEEMNLGVNNITGKIPNQLGSLSMLKALSLDRNQLTGSIPSSLGNLSSLTSLDLSSNHLNGTIPDSIYNLSDITEFGIDKNKLSGKLPTNLGMQLLPNLKKFWGDSNKLGGHIPVSLANASNLEFLSLSHNEFSGFVPNFMGCNNKWGLQVFDLRSNQLGSRGTNDDMSQFIHSLANCSRNLQILALGDNQLSGGIPDEIGKLKNLRVLHLTGNKIAGKIPPALCNIAPLEGLYLGNNQMVGAIPECLGYALNLNGLDLSQNKLLGGDMA	311	936	https://www.nature.com/articles/s41467-019-12607-6	http://cotton.hzau.edu.cn/EN/Download.htm
PlantKGA_88	Piperales	Piperaceae	Piper	nigrum	Piper nigrum	black pepper	胡椒	chromosome	Yes	基因	evmmodelPn161629	evmmodelPn1616291288xxPlantKGA_88	evm.model.Pn16.1629	L	partial	Pn3	24505926	24507934	-	Pfam	PF08263	Leucine rich repeat N-terminal domain	Leucine-rich repeat-containing N-terminal, plant-type	32	65	ALLAIKEQITSDPYGALASWNHSLHFCDWKGVLC	2.7e-09	MPVKRNPNPSSPPLTTTPRRNSAVEIGINQFALLAIKEQITSDPYGALASWNHSLHFCDWKGVLCGRRHRRVTGLDFRFFNLSGTLSNYIGNLSFLRYINLRNEYGMPWEGYNNLQGAIPSEIGRLCRLRILVLRWNSFSGEIPLNLTNCLSLEEIDLGFNNITGKIPNQLGSLLRLEALDLGGNQLTGSIPSSLGNLSSLTWLDLRYNNLNGTLPIELGHLKSLSTFRVSSNQISGTIPDSIFNLSDIKYFVIAQNKLSGKLPTNLGMQLLPNLNYFYGGSNKLGGHIPVSLANASNLVELSLFHNEFRGFVPNFMGRSLRHLDLRSNQLGSGGTNDDMSQFIHSLANSSLYLQRLALGDNQLSGGIPDEIGKLNFLNELHLTGNKITGKIPPALCNI…	442	2009	https://www.nature.com/articles/s41467-019-12607-6	http://cotton.hzau.edu.cn/EN/Download.htm
PlantKGA_88	Piperales	Piperaceae	Piper	nigrum	Piper nigrum	black pepper	胡椒	chromosome	Yes	基因	evmmodelPn161629	evmmodelPn1616291288xxPlantKGA_88	evm.model.Pn16.1629	L	partial	Pn3	24505926	24507934	-	Pfam	PF13516	Leucine Rich repeat	Leucine-rich repeat	376	391	NFLNELHLTGNKITGK	2	MPVKRNPNPSSPPLTTTPRRNSAVEIGINQFALLAIKEQITSDPYGALASWNHSLHFCDWKGVLCGRRHRRVTGLDFRFFNLSGTLSNYIGNLSFLRYINLRNEYGMPWEGYNNLQGAIPSEIGRLCRLRILVLRWNSFSGEIPLNLTNCLSLEEIDLGFNNITGKIPNQLGSLLRLEALDLGGNQLTGSIPSSLGNLSSLTWLDLRYNNLNGTLPIELGHLKSLSTFRVSSNQISGTIPDSIFNLSDIKYFVIAQNKLSGKLPTNLGMQLLPNLNYFYGGSNKLGGHIPVSLANASNLVELSLFHNEFRGFVPNFMGRSLRHLDLRSNQLGSGGTNDDMSQFIHSLANSSLYLQRLALGDNQLSGGIPDEIGKLNFLNELHLTGNKITGKIPPALCNI…	442	2009	https://www.nature.com/articles/s41467-019-12607-6	http://cotton.hzau.edu.cn/EN/Download.htm
PlantKGA_88	Piperales	Piperaceae	Piper	nigrum	Piper nigrum	black pepper	胡椒	chromosome	Yes	基因	evmmodelPn161629	evmmodelPn1616291288xxPlantKGA_88	evm.model.Pn16.1629	L	partial	Pn3	24505926	24507934	-	Pfam	PF13516	Leucine Rich repeat	Leucine-rich repeat	319	335	RSLRHLDLRSNQLGSGG	0.14	MPVKRNPNPSSPPLTTTPRRNSAVEIGINQFALLAIKEQITSDPYGALASWNHSLHFCDWKGVLCGRRHRRVTGLDFRFFNLSGTLSNYIGNLSFLRYINLRNEYGMPWEGYNNLQGAIPSEIGRLCRLRILVLRWNSFSGEIPLNLTNCLSLEEIDLGFNNITGKIPNQLGSLLRLEALDLGGNQLTGSIPSSLGNLSSLTWLDLRYNNLNGTLPIELGHLKSLSTFRVSSNQISGTIPDSIFNLSDIKYFVIAQNKLSGKLPTNLGMQLLPNLNYFYGGSNKLGGHIPVSLANASNLVELSLFHNEFRGFVPNFMGRSLRHLDLRSNQLGSGGTNDDMSQFIHSLANSSLYLQRLALGDNQLSGGIPDEIGKLNFLNELHLTGNKITGKIPPALCNI…	442	2009	https://www.nature.com/articles/s41467-019-12607-6	http://cotton.hzau.edu.cn/EN/Download.htm
PlantKGA_88	Piperales	Piperaceae	Piper	nigrum	Piper nigrum	black pepper	胡椒	chromosome	Yes	基因	evmmodelPn161629	evmmodelPn1616291288xxPlantKGA_88	evm.model.Pn16.1629	L	partial	Pn3	24505926	24507934	-	Pfam	PF00560	Leucine Rich Repeat	Leucine-rich repeat	152	174	SLEEIDLGFNNITGKIPNQLGSL	0.6	MPVKRNPNPSSPPLTTTPRRNSAVEIGINQFALLAIKEQITSDPYGALASWNHSLHFCDWKGVLCGRRHRRVTGLDFRFFNLSGTLSNYIGNLSFLRYINLRNEYGMPWEGYNNLQGAIPSEIGRLCRLRILVLRWNSFSGEIPLNLTNCLSLEEIDLGFNNITGKIPNQLGSLLRLEALDLGGNQLTGSIPSSLGNLSSLTWLDLRYNNLNGTLPIELGHLKSLSTFRVSSNQISGTIPDSIFNLSDIKYFVIAQNKLSGKLPTNLGMQLLPNLNYFYGGSNKLGGHIPVSLANASNLVELSLFHNEFRGFVPNFMGRSLRHLDLRSNQLGSGGTNDDMSQFIHSLANSSLYLQRLALGDNQLSGGIPDEIGKLNFLNELHLTGNKITGKIPPALCNI…	442	2009	https://www.nature.com/articles/s41467-019-12607-6	http://cotton.hzau.edu.cn/EN/Download.htm
PlantKGA_88	Piperales	Piperaceae	Piper	nigrum	Piper nigrum	black pepper	胡椒	chromosome	Yes	基因	evmmodelPn161629	evmmodelPn1616291288xxPlantKGA_88	evm.model.Pn16.1629	L	partial	Pn3	24505926	24507934	-	Pfam	PF13855	Leucine rich repeat	Leucine-rich repeat	176	235	RLEALDLGGNQLTGSIPSSLGNLSSLTWLDLRYNNLNGTLPIELGHLKSLSTFRVSSNQI	3.9e-08	MPVKRNPNPSSPPLTTTPRRNSAVEIGINQFALLAIKEQITSDPYGALASWNHSLHFCDWKGVLCGRRHRRVTGLDFRFFNLSGTLSNYIGNLSFLRYINLRNEYGMPWEGYNNLQGAIPSEIGRLCRLRILVLRWNSFSGEIPLNLTNCLSLEEIDLGFNNITGKIPNQLGSLLRLEALDLGGNQLTGSIPSSLGNLSSLTWLDLRYNNLNGTLPIELGHLKSLSTFRVSSNQISGTIPDSIFNLSDIKYFVIAQNKLSGKLPTNLGMQLLPNLNYFYGGSNKLGGHIPVSLANASNLVELSLFHNEFRGFVPNFMGRSLRHLDLRSNQLGSGGTNDDMSQFIHSLANSSLYLQRLALGDNQLSGGIPDEIGKLNFLNELHLTGNKITGKIPPALCNI…	442	2009	https://www.nature.com/articles/s41467-019-12607-6	http://cotton.hzau.edu.cn/EN/Download.htm
PlantKGA_88	Piperales	Piperaceae	Piper	nigrum	Piper nigrum	black pepper	胡椒	chromosome	Yes	基因	evmmodelPn161634	evmmodelPn1616341288xxPlantKGA_88	evm.model.Pn16.1634	L	partial	Pn3	24479226	24481070	-	Pfam	PF00560	Leucine Rich Repeat	Leucine-rich repeat	275	297	SLKVLMLYNNSLEGNLPNDLKNC	1.9	MRGGGTGGVGRGLRPGRATETRPGSRGVGVTWGRSARQGHSCDGEGMAVAEGGAAAAGSGRVEGPIPPELGSCSELTVFTIAVNQLSGPIPVELGRLQNLRPDQFAESETPLRCNTTVSSQARVLGSVGEIPAVVGECRTLKQLDIANNSLTGTILRERAHLGNVTDLTLNNNSLVGEFPPWIGNLTNLETLAFFHNNLHGQLPPGIGQLSTLGILYLYENQLSGKIPLEIGNCSSLQYIDFFGNQLSESIPITIGRMKNWLSGSVPATFGFLKSLKVLMLYNNSLEGNLPNDLKNCANLTRINISNNRFNGSILPLCSSQSYLSFDVTGNLFEGSIPPMLGSSPFLERLRLGSNMLTGALPSEFPLCKKLKHIDLNNNQLTGPFPAWLGYLPQLGEVK…	403	1845	https://www.nature.com/articles/s41467-019-12607-6	http://cotton.hzau.edu.cn/EN/Download.htm
PlantKGA_88	Piperales	Piperaceae	Piper	nigrum	Piper nigrum	black pepper	胡椒	chromosome	Yes	基因	evmmodelPn161634	evmmodelPn1616341288xxPlantKGA_88	evm.model.Pn16.1634	L	partial	Pn3	24479226	24481070	-	Pfam	PF00560	Leucine Rich Repeat	Leucine-rich repeat	370	389	KLKHIDLNNNQLTGPFPAWL	0.19	MRGGGTGGVGRGLRPGRATETRPGSRGVGVTWGRSARQGHSCDGEGMAVAEGGAAAAGSGRVEGPIPPELGSCSELTVFTIAVNQLSGPIPVELGRLQNLRPDQFAESETPLRCNTTVSSQARVLGSVGEIPAVVGECRTLKQLDIANNSLTGTILRERAHLGNVTDLTLNNNSLVGEFPPWIGNLTNLETLAFFHNNLHGQLPPGIGQLSTLGILYLYENQLSGKIPLEIGNCSSLQYIDFFGNQLSESIPITIGRMKNWLSGSVPATFGFLKSLKVLMLYNNSLEGNLPNDLKNCANLTRINISNNRFNGSILPLCSSQSYLSFDVTGNLFEGSIPPMLGSSPFLERLRLGSNMLTGALPSEFPLCKKLKHIDLNNNQLTGPFPAWLGYLPQLGEVK…	403	1845	https://www.nature.com/articles/s41467-019-12607-6	http://cotton.hzau.edu.cn/EN/Download.htm
PlantKGA_88	Piperales	Piperaceae	Piper	nigrum	Piper nigrum	black pepper	胡椒	chromosome	Yes	基因	evmmodelPn161644	evmmodelPn1616441288xxPlantKGA_88	evm.model.Pn16.1644	L	partial	Pn3	24419984	24421106	-	Pfam	PF13855	Leucine rich repeat	Leucine-rich repeat	125	185	SRLTTLHLFLNHLTGSIPSSLGNLSSLTLLDLGSNNLNGTIPDSIYNLSEITELGIYQNKL	7.9e-07	SRHRRVTGLDFSWYFNLSGALSPHIGNLSFLRYINFIENNLQGAIPSEIGRLYRLRILDLPLNSFSGEIPLNLTNCISLEEMNLAGNKITGKIPNQLGSLSSLKELILSGNQLTGSIPSSLGNLSRLTTLHLFLNHLTGSIPSSLGNLSSLTLLDLGSNNLNGTIPDSIYNLSEITELGIYQNKLSGKLPTNLDMELLPNLEYFYGGSNKLGGHIPLSLANASNLVYLSLPHNEFKGFVPNFMGCNHNKWGLQILDLRFNQLGSGGTNDDISQFIHSLASCTRNLQKLLLGGNQLSGGIPDEIRKLNILRVLHLTGNKIAGKIPLALCNIDPLEELLLGNNQLVGAIPECLGDTLNLTHFDLSQNKLLGGDLA	373	1123	https://www.nature.com/articles/s41467-019-12607-6	http://cotton.hzau.edu.cn/EN/Download.htm
PlantKGA_88	Piperales	Piperaceae	Piper	nigrum	Piper nigrum	black pepper	胡椒	chromosome	Yes	基因	evmmodelPn161644	evmmodelPn1616441288xxPlantKGA_88	evm.model.Pn16.1644	L	partial	Pn3	24419984	24421106	-	Pfam	PF00560	Leucine Rich Repeat	Leucine-rich repeat	102	124	SLKELILSGNQLTGSIPSSLGNL	0.21	SRHRRVTGLDFSWYFNLSGALSPHIGNLSFLRYINFIENNLQGAIPSEIGRLYRLRILDLPLNSFSGEIPLNLTNCISLEEMNLAGNKITGKIPNQLGSLSSLKELILSGNQLTGSIPSSLGNLSRLTTLHLFLNHLTGSIPSSLGNLSSLTLLDLGSNNLNGTIPDSIYNLSEITELGIYQNKLSGKLPTNLDMELLPNLEYFYGGSNKLGGHIPLSLANASNLVYLSLPHNEFKGFVPNFMGCNHNKWGLQILDLRFNQLGSGGTNDDISQFIHSLASCTRNLQKLLLGGNQLSGGIPDEIRKLNILRVLHLTGNKIAGKIPLALCNIDPLEELLLGNNQLVGAIPECLGDTLNLTHFDLSQNKLLGGDLA	373	1123	https://www.nature.com/articles/s41467-019-12607-6	http://cotton.hzau.edu.cn/EN/Download.htm
PlantKGA_88	Piperales	Piperaceae	Piper	nigrum	Piper nigrum	black pepper	胡椒	chromosome	Yes	基因	evmmodelPn161651	evmmodelPn1616511288xxPlantKGA_88	evm.model.Pn16.1651	L	partial	Pn3	24346502	24347788	-	Pfam	PF00560	Leucine Rich Repeat	Leucine-rich repeat	267	288	LEELYLDNNELVGSIPACLQDL	0.5	MLFLSYNSFSGEIPPILANCFSLQVIDLFGNQLSGKVPHQLGSLSKLKTLDLGSYLLTGKIHLSENQLAGKIPGSNNLNGTLPIELGSLKSLTNFWVGSNQISGTIPDSIYNLSSITDFVICRNKVSGKLPTNLGNEVLPNIEVFFVDSNKFGGQIPVSLANASNLLALSLSRNEFCGFIPDFGRSCNELLYLNLRHNRLSGLTNIGGIASLANCTNLTLLALGDNHHIVESIPNEIRKLVRLTVLDLSGNEMGGKISPSLCNLTMLEELYLDNNELVGSIPACLQDLENLQKLDFSENKLGSLM	305	1287	https://www.nature.com/articles/s41467-019-12607-6	http://cotton.hzau.edu.cn/EN/Download.htm
PlantKGA_88	Piperales	Piperaceae	Piper	nigrum	Piper nigrum	black pepper	胡椒	chromosome	Yes	基因	evmmodelPn161651	evmmodelPn1616511288xxPlantKGA_88	evm.model.Pn16.1651	L	partial	Pn3	24346502	24347788	-	Pfam	PF00560	Leucine Rich Repeat	Leucine-rich repeat	242	264	RLTVLDLSGNEMGGKISPSLCNL	0.083	MLFLSYNSFSGEIPPILANCFSLQVIDLFGNQLSGKVPHQLGSLSKLKTLDLGSYLLTGKIHLSENQLAGKIPGSNNLNGTLPIELGSLKSLTNFWVGSNQISGTIPDSIYNLSSITDFVICRNKVSGKLPTNLGNEVLPNIEVFFVDSNKFGGQIPVSLANASNLLALSLSRNEFCGFIPDFGRSCNELLYLNLRHNRLSGLTNIGGIASLANCTNLTLLALGDNHHIVESIPNEIRKLVRLTVLDLSGNEMGGKISPSLCNLTMLEELYLDNNELVGSIPACLQDLENLQKLDFSENKLGSLM	305	1287	https://www.nature.com/articles/s41467-019-12607-6	http://cotton.hzau.edu.cn/EN/Download.htm
PlantKGA_88	Piperales	Piperaceae	Piper	nigrum	Piper nigrum	black pepper	胡椒	chromosome	Yes	基因	evmmodelPn16168	evmmodelPn161681288xxPlantKGA_88	evm.model.Pn16.168	L	partial	Pn3	31507182	31509569	-	Pfam	PF12799	Leucine Rich repeats (2 copies)	Leucine rich repeat 4	471	510	TELKVLDLSRNELTGTIPSFIGCMKFLTYLNLSHNKFSGT	3e-06	MVEFAAVKPALICLLFTLHVSVLNSQNTSCNSADLAVLRDFLKGQDIDNLGWHPSSDECCQWPGVGCTNFSRSGFVGSTTILGQRVLRLDLGGRQLKGLLPNSLAGLEQLRVLNLSSNVFTGPLPQGLFRLQHLQFLDLSSNSFNGFIPSTASLPSIRVFDISGNSFSGPLPHPPAGSLNLTKFIIGKNEFDSLTDASSICNTSLKIQVLDLSSNRFTGSIPPGISHCRSLTDLYLNSNHFSGNLPDDLFGMTTLRKLLIHGNRLSGQLDRRIQNLKNLVYLDVSDNDFTGVMPDIFNSLTKLEHFSASYNSFSGMLPETLSSHTLIHLDLRENGFQGRINLNCTQLVHLRFLDLSSNRLTGSIPSHLSQCTQLSNINLSGNKLKGLIPDTIKNIRPLY…	795	2388	https://www.nature.com/articles/s41467-019-12607-6	http://cotton.hzau.edu.cn/EN/Download.htm
PlantKGA_88	Piperales	Piperaceae	Piper	nigrum	Piper nigrum	black pepper	胡椒	chromosome	Yes	基因	evmmodelPn16168	evmmodelPn161681288xxPlantKGA_88	evm.model.Pn16.168	L	partial	Pn3	31507182	31509569	-	Pfam	PF13855	Leucine rich repeat	Leucine-rich repeat	349	407	HLRFLDLSSNRLTGSIPSHLSQCTQLSNINLSGNKLKGLIPDTIKNIRPLYYLALADNG	2.3e-06	MVEFAAVKPALICLLFTLHVSVLNSQNTSCNSADLAVLRDFLKGQDIDNLGWHPSSDECCQWPGVGCTNFSRSGFVGSTTILGQRVLRLDLGGRQLKGLLPNSLAGLEQLRVLNLSSNVFTGPLPQGLFRLQHLQFLDLSSNSFNGFIPSTASLPSIRVFDISGNSFSGPLPHPPAGSLNLTKFIIGKNEFDSLTDASSICNTSLKIQVLDLSSNRFTGSIPPGISHCRSLTDLYLNSNHFSGNLPDDLFGMTTLRKLLIHGNRLSGQLDRRIQNLKNLVYLDVSDNDFTGVMPDIFNSLTKLEHFSASYNSFSGMLPETLSSHTLIHLDLRENGFQGRINLNCTQLVHLRFLDLSSNRLTGSIPSHLSQCTQLSNINLSGNKLKGLIPDTIKNIRPLY…	795	2388	https://www.nature.com/articles/s41467-019-12607-6	http://cotton.hzau.edu.cn/EN/Download.htm
PlantKGA_88	Piperales	Piperaceae	Piper	nigrum	Piper nigrum	black pepper	胡椒	chromosome	Yes	基因	evmmodelPn16168	evmmodelPn161681288xxPlantKGA_88	evm.model.Pn16.168	L	partial	Pn3	31507182	31509569	-	Pfam	PF13855	Leucine rich repeat	Leucine-rich repeat	207	265	IQVLDLSSNRFTGSIPPGISHCRSLTDLYLNSNHFSGNLPDDLFGMTTLRKLLIHGNRL	6.2e-07	MVEFAAVKPALICLLFTLHVSVLNSQNTSCNSADLAVLRDFLKGQDIDNLGWHPSSDECCQWPGVGCTNFSRSGFVGSTTILGQRVLRLDLGGRQLKGLLPNSLAGLEQLRVLNLSSNVFTGPLPQGLFRLQHLQFLDLSSNSFNGFIPSTASLPSIRVFDISGNSFSGPLPHPPAGSLNLTKFIIGKNEFDSLTDASSICNTSLKIQVLDLSSNRFTGSIPPGISHCRSLTDLYLNSNHFSGNLPDDLFGMTTLRKLLIHGNRLSGQLDRRIQNLKNLVYLDVSDNDFTGVMPDIFNSLTKLEHFSASYNSFSGMLPETLSSHTLIHLDLRENGFQGRINLNCTQLVHLRFLDLSSNRLTGSIPSHLSQCTQLSNINLSGNKLKGLIPDTIKNIRPLY…	795	2388	https://www.nature.com/articles/s41467-019-12607-6	http://cotton.hzau.edu.cn/EN/Download.htm
PlantKGA_88	Piperales	Piperaceae	Piper	nigrum	Piper nigrum	black pepper	胡椒	chromosome	Yes	基因	evmmodelPn16168	evmmodelPn161681288xxPlantKGA_88	evm.model.Pn16.168	L	partial	Pn3	31507182	31509569	-	Pfam	PF13855	Leucine rich repeat	Leucine-rich repeat	571	629	LVILDLSFNHLSSDIPTSLSYLSNMEVLDLSNNNLTGTIPDSLTSLTFMSSFSVANNRL	7.5e-07	MVEFAAVKPALICLLFTLHVSVLNSQNTSCNSADLAVLRDFLKGQDIDNLGWHPSSDECCQWPGVGCTNFSRSGFVGSTTILGQRVLRLDLGGRQLKGLLPNSLAGLEQLRVLNLSSNVFTGPLPQGLFRLQHLQFLDLSSNSFNGFIPSTASLPSIRVFDISGNSFSGPLPHPPAGSLNLTKFIIGKNEFDSLTDASSICNTSLKIQVLDLSSNRFTGSIPPGISHCRSLTDLYLNSNHFSGNLPDDLFGMTTLRKLLIHGNRLSGQLDRRIQNLKNLVYLDVSDNDFTGVMPDIFNSLTKLEHFSASYNSFSGMLPETLSSHTLIHLDLRENGFQGRINLNCTQLVHLRFLDLSSNRLTGSIPSHLSQCTQLSNINLSGNKLKGLIPDTIKNIRPLY…	795	2388	https://www.nature.com/articles/s41467-019-12607-6	http://cotton.hzau.edu.cn/EN/Download.htm
PlantKGA_88	Piperales	Piperaceae	Piper	nigrum	Piper nigrum	black pepper	胡椒	chromosome	Yes	基因	evmmodelPn161680	evmmodelPn1616801288xxPlantKGA_88	evm.model.Pn16.1680	L	partial	Pn3	24038663	24039832	-	Pfam	PF00560	Leucine Rich Repeat	Leucine-rich repeat	95	117	SLKEMNLEGNKITGKIPNQLGSL	0.8	MTSWNDSLHFCDWHGVSCGRRHRRVTGLDVDYFALSGTLSPYIGNLTFLRFIHLKAYLQGAIPSEIGRLYRLHLLDLRFNLFSGEIPLNLTNCLSLKEMNLEGNKITGKIPNQLGSLSRLERLRLDYNQLTGSIPSSLGNLSSLVYLDLSSNHLNGTLPIELGHLKSLANFDVSFNQISGTIPDSIYNLSDITEFGIGKNKLSGKLPTNLGMQLLPNLKFFYGDSNKLGGHIPVSLANASNLDDLSLSHNEFRGYVPNFMGCNNKWGLLSLDLRSNQLGSGGTNDDISQFIHSLANCSHNLYQLALGGNQLSGGIPDEIGKLNGLMVLHLTGNKIAGKIPPALCNIAPLKGLYLGNNQLVGAIPQCLGDTLNLTHLDLSQNKLLGGDMA	389	1170	https://www.nature.com/articles/s41467-019-12607-6	http://cotton.hzau.edu.cn/EN/Download.htm
PlantKGA_88	Piperales	Piperaceae	Piper	nigrum	Piper nigrum	black pepper	胡椒	chromosome	Yes	基因	evmmodelPn161680	evmmodelPn1616801288xxPlantKGA_88	evm.model.Pn16.1680	L	partial	Pn3	24038663	24039832	-	Pfam	PF13855	Leucine rich repeat	Leucine-rich repeat	118	178	SRLERLRLDYNQLTGSIPSSLGNLSSLVYLDLSSNHLNGTLPIELGHLKSLANFDVSFNQI	4.2e-08	MTSWNDSLHFCDWHGVSCGRRHRRVTGLDVDYFALSGTLSPYIGNLTFLRFIHLKAYLQGAIPSEIGRLYRLHLLDLRFNLFSGEIPLNLTNCLSLKEMNLEGNKITGKIPNQLGSLSRLERLRLDYNQLTGSIPSSLGNLSSLVYLDLSSNHLNGTLPIELGHLKSLANFDVSFNQISGTIPDSIYNLSDITEFGIGKNKLSGKLPTNLGMQLLPNLKFFYGDSNKLGGHIPVSLANASNLDDLSLSHNEFRGYVPNFMGCNNKWGLLSLDLRSNQLGSGGTNDDISQFIHSLANCSHNLYQLALGGNQLSGGIPDEIGKLNGLMVLHLTGNKIAGKIPPALCNIAPLKGLYLGNNQLVGAIPQCLGDTLNLTHLDLSQNKLLGGDMA	389	1170	https://www.nature.com/articles/s41467-019-12607-6	http://cotton.hzau.edu.cn/EN/Download.htm
PlantKGA_88	Piperales	Piperaceae	Piper	nigrum	Piper nigrum	black pepper	胡椒	chromosome	Yes	基因	evmmodelPn161723	evmmodelPn1617231288xxPlantKGA_88	evm.model.Pn16.1723	L	partial	Pn3	23705663	23706946	-	Pfam	PF00560	Leucine Rich Repeat	Leucine-rich repeat	318	340	RLTVLDLSGNEMGGKISPSLCNL	0.11	MLFLSYNSFSGEIPLILANCFSLQVIDLFGNQLFGKVPRQLGSLSKLKTLDLGSYLLTGSIPSSLGKLSSYRNLSSNHLAGKIPDQLGSLSKLRTLDLSSNYQLPGTIPSSLGSLSSLTRLTLDLAVSQLTGSIPSSIGNLSSLTSLYLGSNNLNGTLPIELGSLKSLTNFWVGSNQISGTIPDSIYNLSSITDFVICRNKVSGKLPTNLGNEVLPNIEVFFVDSNKFGGQIPVSLANASILLALSLSRNEFCGFIPDFGRSCNELLYLNLRHNRLSGLTNIGGIASLANCTNLMLLALGDNHHIVESIPNEIGKLVRLTVLDLSGNEMGGKISPSLCNLTMLEELYLDNNELVGSIPACLQDLENLQKLDFSENKLGSLM	381	1284	https://www.nature.com/articles/s41467-019-12607-6	http://cotton.hzau.edu.cn/EN/Download.htm
PlantKGA_88	Piperales	Piperaceae	Piper	nigrum	Piper nigrum	black pepper	胡椒	chromosome	Yes	基因	evmmodelPn161723	evmmodelPn1617231288xxPlantKGA_88	evm.model.Pn16.1723	L	partial	Pn3	23705663	23706946	-	Pfam	PF00560	Leucine Rich Repeat	Leucine-rich repeat	343	364	LEELYLDNNELVGSIPACLQDL	0.67	MLFLSYNSFSGEIPLILANCFSLQVIDLFGNQLFGKVPRQLGSLSKLKTLDLGSYLLTGSIPSSLGKLSSYRNLSSNHLAGKIPDQLGSLSKLRTLDLSSNYQLPGTIPSSLGSLSSLTRLTLDLAVSQLTGSIPSSIGNLSSLTSLYLGSNNLNGTLPIELGSLKSLTNFWVGSNQISGTIPDSIYNLSSITDFVICRNKVSGKLPTNLGNEVLPNIEVFFVDSNKFGGQIPVSLANASILLALSLSRNEFCGFIPDFGRSCNELLYLNLRHNRLSGLTNIGGIASLANCTNLMLLALGDNHHIVESIPNEIGKLVRLTVLDLSGNEMGGKISPSLCNLTMLEELYLDNNELVGSIPACLQDLENLQKLDFSENKLGSLM	381	1284	https://www.nature.com/articles/s41467-019-12607-6	http://cotton.hzau.edu.cn/EN/Download.htm
PlantKGA_88	Piperales	Piperaceae	Piper	nigrum	Piper nigrum	black pepper	胡椒	chromosome	Yes	基因	evmmodelPn161723	evmmodelPn1617231288xxPlantKGA_88	evm.model.Pn16.1723	L	partial	Pn3	23705663	23706946	-	Pfam	PF00560	Leucine Rich Repeat	Leucine-rich repeat	92	115	KLRTLDLSSNYQLPGTIPSSLGSL	0.97	MLFLSYNSFSGEIPLILANCFSLQVIDLFGNQLFGKVPRQLGSLSKLKTLDLGSYLLTGSIPSSLGKLSSYRNLSSNHLAGKIPDQLGSLSKLRTLDLSSNYQLPGTIPSSLGSLSSLTRLTLDLAVSQLTGSIPSSIGNLSSLTSLYLGSNNLNGTLPIELGSLKSLTNFWVGSNQISGTIPDSIYNLSSITDFVICRNKVSGKLPTNLGNEVLPNIEVFFVDSNKFGGQIPVSLANASILLALSLSRNEFCGFIPDFGRSCNELLYLNLRHNRLSGLTNIGGIASLANCTNLMLLALGDNHHIVESIPNEIGKLVRLTVLDLSGNEMGGKISPSLCNLTMLEELYLDNNELVGSIPACLQDLENLQKLDFSENKLGSLM	381	1284	https://www.nature.com/articles/s41467-019-12607-6	http://cotton.hzau.edu.cn/EN/Download.htm
PlantKGA_88	Piperales	Piperaceae	Piper	nigrum	Piper nigrum	black pepper	胡椒	chromosome	Yes	基因	evmmodelPn161725	evmmodelPn1617251288xxPlantKGA_88	evm.model.Pn16.1725	L	partial	Pn3	23637926	23638996	-	Pfam	PF13855	Leucine rich repeat	Leucine-rich repeat	14	73	TLKTLRLDGNQLTGIIPSSLGNLSSLKEMDLRNNDITGEIPNQLGSLSRIKALYLYGNHL	2.6e-11	MTGKIPNQLGSLSTLKTLRLDGNQLTGIIPSSLGNLSSLKEMDLRNNDITGEIPNQLGSLSRIKALYLYGNHLTGSIPSSLGNLSSLEEIDLSRNYLTGKIPNQLGSLSRVKTLNLYRNQLTRSIPSSLGHLSSLTSLDLSYNNLNGTIPDSIYNLSDITEFDIEHNKLSGKLPTNLGIQLLPNLQFFIGGSNKLGGHIPVSLANASKLEFLSLSYNELRGFVPNFMGCNNKWGLLYLDLRSNQLGSGGTNDDMSQFIHSLANSSRNLQTLSLGGNQLSGGIPDEIGKLNSLWVLHLTGNKIAGKIPLALCSIAPLKGLYLGNNQLVGEIPDCLGDTLNLTHLDLSQNKLLGGDMA	356	1071	https://www.nature.com/articles/s41467-019-12607-6	http://cotton.hzau.edu.cn/EN/Download.htm
PlantKGA_88	Piperales	Piperaceae	Piper	nigrum	Piper nigrum	black pepper	胡椒	chromosome	Yes	基因	evmmodelPn161725	evmmodelPn1617251288xxPlantKGA_88	evm.model.Pn16.1725	L	partial	Pn3	23637926	23638996	-	Pfam	PF13855	Leucine rich repeat	Leucine-rich repeat	110	169	RVKTLNLYRNQLTRSIPSSLGHLSSLTSLDLSYNNLNGTIPDSIYNLSDITEFDIEHNKL	8.1e-10	MTGKIPNQLGSLSTLKTLRLDGNQLTGIIPSSLGNLSSLKEMDLRNNDITGEIPNQLGSLSRIKALYLYGNHLTGSIPSSLGNLSSLEEIDLSRNYLTGKIPNQLGSLSRVKTLNLYRNQLTRSIPSSLGHLSSLTSLDLSYNNLNGTIPDSIYNLSDITEFDIEHNKLSGKLPTNLGIQLLPNLQFFIGGSNKLGGHIPVSLANASKLEFLSLSYNELRGFVPNFMGCNNKWGLLYLDLRSNQLGSGGTNDDMSQFIHSLANSSRNLQTLSLGGNQLSGGIPDEIGKLNSLWVLHLTGNKIAGKIPLALCSIAPLKGLYLGNNQLVGEIPDCLGDTLNLTHLDLSQNKLLGGDMA	356	1071	https://www.nature.com/articles/s41467-019-12607-6	http://cotton.hzau.edu.cn/EN/Download.htm
PlantKGA_88	Piperales	Piperaceae	Piper	nigrum	Piper nigrum	black pepper	胡椒	chromosome	Yes	基因	evmmodelPn161725	evmmodelPn1617251288xxPlantKGA_88	evm.model.Pn16.1725	L	partial	Pn3	23637926	23638996	-	Pfam	PF00560	Leucine Rich Repeat	Leucine-rich repeat	267	289	NLQTLSLGGNQLSGGIPDEIGKL	0.38	MTGKIPNQLGSLSTLKTLRLDGNQLTGIIPSSLGNLSSLKEMDLRNNDITGEIPNQLGSLSRIKALYLYGNHLTGSIPSSLGNLSSLEEIDLSRNYLTGKIPNQLGSLSRVKTLNLYRNQLTRSIPSSLGHLSSLTSLDLSYNNLNGTIPDSIYNLSDITEFDIEHNKLSGKLPTNLGIQLLPNLQFFIGGSNKLGGHIPVSLANASKLEFLSLSYNELRGFVPNFMGCNNKWGLLYLDLRSNQLGSGGTNDDMSQFIHSLANSSRNLQTLSLGGNQLSGGIPDEIGKLNSLWVLHLTGNKIAGKIPLALCSIAPLKGLYLGNNQLVGEIPDCLGDTLNLTHLDLSQNKLLGGDMA	356	1071	https://www.nature.com/articles/s41467-019-12607-6	http://cotton.hzau.edu.cn/EN/Download.htm
PlantKGA_88	Piperales	Piperaceae	Piper	nigrum	Piper nigrum	black pepper	胡椒	chromosome	Yes	基因	evmmodelPn161725	evmmodelPn1617251288xxPlantKGA_88	evm.model.Pn16.1725	L	partial	Pn3	23637926	23638996	-	Pfam	PF00560	Leucine Rich Repeat	Leucine-rich repeat	86	108	SLEEIDLSRNYLTGKIPNQLGSL	0.1	MTGKIPNQLGSLSTLKTLRLDGNQLTGIIPSSLGNLSSLKEMDLRNNDITGEIPNQLGSLSRIKALYLYGNHLTGSIPSSLGNLSSLEEIDLSRNYLTGKIPNQLGSLSRVKTLNLYRNQLTRSIPSSLGHLSSLTSLDLSYNNLNGTIPDSIYNLSDITEFDIEHNKLSGKLPTNLGIQLLPNLQFFIGGSNKLGGHIPVSLANASKLEFLSLSYNELRGFVPNFMGCNNKWGLLYLDLRSNQLGSGGTNDDMSQFIHSLANSSRNLQTLSLGGNQLSGGIPDEIGKLNSLWVLHLTGNKIAGKIPLALCSIAPLKGLYLGNNQLVGEIPDCLGDTLNLTHLDLSQNKLLGGDMA	356	1071	https://www.nature.com/articles/s41467-019-12607-6	http://cotton.hzau.edu.cn/EN/Download.htm
PlantKGA_88	Piperales	Piperaceae	Piper	nigrum	Piper nigrum	black pepper	胡椒	chromosome	Yes	基因	evmmodelPn161732	evmmodelPn1617321288xxPlantKGA_88	evm.model.Pn16.1732	L	partial	Pn3	23593398	23595062	-	Pfam	PF13855	Leucine rich repeat	Leucine-rich repeat	261	320	SLEDMDLFANNITGKFPNQLGSLSRLKTLNFYGNQFTGSIPSSLGKLSSLTYLDLSSNNL	5e-07	MGVSCSSRLKRVTGLDFSSFNLSGTLSNYIGNLSFLRYINLRNEEYRQPWEGSNYLQGTIPSEIGRLCRLRRLDLSFNSFSGEIPYQLGSLPRLGTLKLDKNRLTGSIPSSLGNLSSLEEMDLDDNNITGEIPSEIGRLYRLRKLDLSWNSCSGEIPLNLTNCLSLEEMDFGWNNITGRIPNQLGSLSRLKTLYLGGNQLTGSIPSSLGNLSSLEEMDLIRNNITGKIPNQLGSLSRLKTLILYGNQLTGSIPSSLGYLSSLEDMDLFANNITGKFPNQLGSLSRLKTLNFYGNQFTGSIPSSLGKLSSLTYLDLSSNNLNGTLPIELGHLKSLAIFYVSSNQISGTIPDSIYNLSDITKFVIAQNKLSGKLPTNLGMHPNLEYFDGGSNKLGGHIPVS…	554	1665	https://www.nature.com/articles/s41467-019-12607-6	http://cotton.hzau.edu.cn/EN/Download.htm
PlantKGA_88	Piperales	Piperaceae	Piper	nigrum	Piper nigrum	black pepper	胡椒	chromosome	Yes	基因	evmmodelPn161732	evmmodelPn1617321288xxPlantKGA_88	evm.model.Pn16.1732	L	partial	Pn3	23593398	23595062	-	Pfam	PF13855	Leucine rich repeat	Leucine-rich repeat	188	248	SRLKTLYLGGNQLTGSIPSSLGNLSSLEEMDLIRNNITGKIPNQLGSLSRLKTLILYGNQL	5.5e-09	MGVSCSSRLKRVTGLDFSSFNLSGTLSNYIGNLSFLRYINLRNEEYRQPWEGSNYLQGTIPSEIGRLCRLRRLDLSFNSFSGEIPYQLGSLPRLGTLKLDKNRLTGSIPSSLGNLSSLEEMDLDDNNITGEIPSEIGRLYRLRKLDLSWNSCSGEIPLNLTNCLSLEEMDFGWNNITGRIPNQLGSLSRLKTLYLGGNQLTGSIPSSLGNLSSLEEMDLIRNNITGKIPNQLGSLSRLKTLILYGNQLTGSIPSSLGYLSSLEDMDLFANNITGKFPNQLGSLSRLKTLNFYGNQFTGSIPSSLGKLSSLTYLDLSSNNLNGTLPIELGHLKSLAIFYVSSNQISGTIPDSIYNLSDITKFVIAQNKLSGKLPTNLGMHPNLEYFDGGSNKLGGHIPVS…	554	1665	https://www.nature.com/articles/s41467-019-12607-6	http://cotton.hzau.edu.cn/EN/Download.htm
PlantKGA_88	Piperales	Piperaceae	Piper	nigrum	Piper nigrum	black pepper	胡椒	chromosome	Yes	基因	evmmodelPn161732	evmmodelPn1617321288xxPlantKGA_88	evm.model.Pn16.1732	L	partial	Pn3	23593398	23595062	-	Pfam	PF13855	Leucine rich repeat	Leucine-rich repeat	92	150	PRLGTLKLDKNRLTGSIPSSLGNLSSLEEMDLDDNNITGEIPSEIGRLYRLRKLDLSWN	5.6e-09	MGVSCSSRLKRVTGLDFSSFNLSGTLSNYIGNLSFLRYINLRNEEYRQPWEGSNYLQGTIPSEIGRLCRLRRLDLSFNSFSGEIPYQLGSLPRLGTLKLDKNRLTGSIPSSLGNLSSLEEMDLDDNNITGEIPSEIGRLYRLRKLDLSWNSCSGEIPLNLTNCLSLEEMDFGWNNITGRIPNQLGSLSRLKTLYLGGNQLTGSIPSSLGNLSSLEEMDLIRNNITGKIPNQLGSLSRLKTLILYGNQLTGSIPSSLGYLSSLEDMDLFANNITGKFPNQLGSLSRLKTLNFYGNQFTGSIPSSLGKLSSLTYLDLSSNNLNGTLPIELGHLKSLAIFYVSSNQISGTIPDSIYNLSDITKFVIAQNKLSGKLPTNLGMHPNLEYFDGGSNKLGGHIPVS…	554	1665	https://www.nature.com/articles/s41467-019-12607-6	http://cotton.hzau.edu.cn/EN/Download.htm
PlantKGA_88	Piperales	Piperaceae	Piper	nigrum	Piper nigrum	black pepper	胡椒	chromosome	Yes	基因	evmmodelPn161732	evmmodelPn1617321288xxPlantKGA_88	evm.model.Pn16.1732	L	partial	Pn3	23593398	23595062	-	Pfam	PF00560	Leucine Rich Repeat	Leucine-rich repeat	489	509	LRVLHLTGNKITGKIPPALCN	0.78	MGVSCSSRLKRVTGLDFSSFNLSGTLSNYIGNLSFLRYINLRNEEYRQPWEGSNYLQGTIPSEIGRLCRLRRLDLSFNSFSGEIPYQLGSLPRLGTLKLDKNRLTGSIPSSLGNLSSLEEMDLDDNNITGEIPSEIGRLYRLRKLDLSWNSCSGEIPLNLTNCLSLEEMDFGWNNITGRIPNQLGSLSRLKTLYLGGNQLTGSIPSSLGNLSSLEEMDLIRNNITGKIPNQLGSLSRLKTLILYGNQLTGSIPSSLGYLSSLEDMDLFANNITGKFPNQLGSLSRLKTLNFYGNQFTGSIPSSLGKLSSLTYLDLSSNNLNGTLPIELGHLKSLAIFYVSSNQISGTIPDSIYNLSDITKFVIAQNKLSGKLPTNLGMHPNLEYFDGGSNKLGGHIPVS…	554	1665	https://www.nature.com/articles/s41467-019-12607-6	http://cotton.hzau.edu.cn/EN/Download.htm
PlantKGA_88	Piperales	Piperaceae	Piper	nigrum	Piper nigrum	black pepper	胡椒	chromosome	Yes	基因	evmmodelPn161733	evmmodelPn1617331288xxPlantKGA_88	evm.model.Pn16.1733	L	partial	Pn3	23590896	23591660	-	Pfam	PF13855	Leucine rich repeat	Leucine-rich repeat	2	56	DLRFNNITGKIPNQLGSLSRLKTLYLGGNQLTGSIPSSLGNLSSLTYLDLESNNL	3.5e-09	MDLRFNNITGKIPNQLGSLSRLKTLYLGGNQLTGSIPSSLGNLSSLTYLDLESNNLNGTIPDSIYNLSNITEFSIRQNKLSGKLPTNLGMQLIPNLEYFYGDSNKLGGRIPVSLANASKLEYLSLSHNEFRGFVPNFMGCNQLGSGGTNDDMSQFIHSLANCSRNLGEQALGDNQLSGGIPDEIGKLNGLWVLHLSGNKIFGKIPPALCKIAPLEGLYLGNNQLVGAITECLGDTLNLLDLSQNKLCGGDMASE	254	765	https://www.nature.com/articles/s41467-019-12607-6	http://cotton.hzau.edu.cn/EN/Download.htm
PlantKGA_88	Piperales	Piperaceae	Piper	nigrum	Piper nigrum	black pepper	胡椒	chromosome	Yes	基因	evmmodelPn16176	evmmodelPn161761288xxPlantKGA_88	evm.model.Pn16.176	L	partial	Pn3	31444316	31446460	-	Pfam	PF08263	Leucine rich repeat N-terminal domain	Leucine-rich repeat-containing N-terminal, plant-type	36	73	PNDLASLQGFFMGLSSRVPGWPADKYSTDCCQWHGVHC	0.0003	MSLTATAPMATTILLLSLLSMASSLPSPSQNSACHPNDLASLQGFFMGLSSRVPGWPADKYSTDCCQWHGVHCEEVGGRRRVVRLELGHYSLQGTVSDQSLSGLDQLRVLDLSHNLLAGELPSKLLHLNHLQVLDLSFNRLKGAVPSNNSLPSLQVFNISSNLFFGMFPALANSPLLTSFAIEDNNFGGSVDRQLCLRSPKITDLHLSDNKFSGVLHPGTIANCTNLIHLDLGSNFFTGNLPDELFAIPSLERLSLQDNMFSGVLSENFGNLSNLLVVDMSLNGFFGEIPDVFNGLERLEKFSATSNRFSGHLPTSISNLSSLERLNLRNNSLEDEISLNCSTMSSMKSLDLGSNQFTGRNLHELSRCRKLRTLNLSKNRINGLLPDSFKELQHLYSLA…	714	2145	https://www.nature.com/articles/s41467-019-12607-6	http://cotton.hzau.edu.cn/EN/Download.htm
PlantKGA_88	Piperales	Piperaceae	Piper	nigrum	Piper nigrum	black pepper	胡椒	chromosome	Yes	基因	evmmodelPn16176	evmmodelPn161761288xxPlantKGA_88	evm.model.Pn16.176	L	partial	Pn3	31444316	31446460	-	Pfam	PF13855	Leucine rich repeat	Leucine-rich repeat	470	527	TNLQTLDLSWNRLEGTIPNWFGDLGNLFYLDISNNYLSGEVARSMTQLKSLISLNISQ	1.4e-09	MSLTATAPMATTILLLSLLSMASSLPSPSQNSACHPNDLASLQGFFMGLSSRVPGWPADKYSTDCCQWHGVHCEEVGGRRRVVRLELGHYSLQGTVSDQSLSGLDQLRVLDLSHNLLAGELPSKLLHLNHLQVLDLSFNRLKGAVPSNNSLPSLQVFNISSNLFFGMFPALANSPLLTSFAIEDNNFGGSVDRQLCLRSPKITDLHLSDNKFSGVLHPGTIANCTNLIHLDLGSNFFTGNLPDELFAIPSLERLSLQDNMFSGVLSENFGNLSNLLVVDMSLNGFFGEIPDVFNGLERLEKFSATSNRFSGHLPTSISNLSSLERLNLRNNSLEDEISLNCSTMSSMKSLDLGSNQFTGRNLHELSRCRKLRTLNLSKNRINGLLPDSFKELQHLYSLA…	714	2145	https://www.nature.com/articles/s41467-019-12607-6	http://cotton.hzau.edu.cn/EN/Download.htm
PlantKGA_88	Piperales	Piperaceae	Piper	nigrum	Piper nigrum	black pepper	胡椒	chromosome	Yes	基因	evmmodelPn16176	evmmodelPn161761288xxPlantKGA_88	evm.model.Pn16.176	L	partial	Pn3	31444316	31446460	-	Pfam	PF13855	Leucine rich repeat	Leucine-rich repeat	369	431	RKLRTLNLSKNRINGLLPDSFKELQHLYSLALSASGLSNLSEALMVLVQCKNLTILVLSGNNF	1.5e-06	MSLTATAPMATTILLLSLLSMASSLPSPSQNSACHPNDLASLQGFFMGLSSRVPGWPADKYSTDCCQWHGVHCEEVGGRRRVVRLELGHYSLQGTVSDQSLSGLDQLRVLDLSHNLLAGELPSKLLHLNHLQVLDLSFNRLKGAVPSNNSLPSLQVFNISSNLFFGMFPALANSPLLTSFAIEDNNFGGSVDRQLCLRSPKITDLHLSDNKFSGVLHPGTIANCTNLIHLDLGSNFFTGNLPDELFAIPSLERLSLQDNMFSGVLSENFGNLSNLLVVDMSLNGFFGEIPDVFNGLERLEKFSATSNRFSGHLPTSISNLSSLERLNLRNNSLEDEISLNCSTMSSMKSLDLGSNQFTGRNLHELSRCRKLRTLNLSKNRINGLLPDSFKELQHLYSLA…	714	2145	https://www.nature.com/articles/s41467-019-12607-6	http://cotton.hzau.edu.cn/EN/Download.htm
PlantKGA_88	Piperales	Piperaceae	Piper	nigrum	Piper nigrum	black pepper	胡椒	chromosome	Yes	基因	evmmodelPn16176	evmmodelPn161761288xxPlantKGA_88	evm.model.Pn16.176	L	partial	Pn3	31444316	31446460	-	Pfam	PF13855	Leucine rich repeat	Leucine-rich repeat	558	614	TLDLSSNNLLGPIWPEFGNLKKLHVLNLSRNDLSGSIPHELSGMTNIEALDLSYNGL	7.6e-09	MSLTATAPMATTILLLSLLSMASSLPSPSQNSACHPNDLASLQGFFMGLSSRVPGWPADKYSTDCCQWHGVHCEEVGGRRRVVRLELGHYSLQGTVSDQSLSGLDQLRVLDLSHNLLAGELPSKLLHLNHLQVLDLSFNRLKGAVPSNNSLPSLQVFNISSNLFFGMFPALANSPLLTSFAIEDNNFGGSVDRQLCLRSPKITDLHLSDNKFSGVLHPGTIANCTNLIHLDLGSNFFTGNLPDELFAIPSLERLSLQDNMFSGVLSENFGNLSNLLVVDMSLNGFFGEIPDVFNGLERLEKFSATSNRFSGHLPTSISNLSSLERLNLRNNSLEDEISLNCSTMSSMKSLDLGSNQFTGRNLHELSRCRKLRTLNLSKNRINGLLPDSFKELQHLYSLA…	714	2145	https://www.nature.com/articles/s41467-019-12607-6	http://cotton.hzau.edu.cn/EN/Download.htm
PlantKGA_88	Piperales	Piperaceae	Piper	nigrum	Piper nigrum	black pepper	胡椒	chromosome	Yes	基因	evmmodelPn16176	evmmodelPn161761288xxPlantKGA_88	evm.model.Pn16.176	L	partial	Pn3	31444316	31446460	-	Pfam	PF13855	Leucine rich repeat	Leucine-rich repeat	200	260	PKITDLHLSDNKFSGVLHPGTIANCTNLIHLDLGSNFFTGNLPDELFAIPSLERLSLQDNM	6.2e-08	MSLTATAPMATTILLLSLLSMASSLPSPSQNSACHPNDLASLQGFFMGLSSRVPGWPADKYSTDCCQWHGVHCEEVGGRRRVVRLELGHYSLQGTVSDQSLSGLDQLRVLDLSHNLLAGELPSKLLHLNHLQVLDLSFNRLKGAVPSNNSLPSLQVFNISSNLFFGMFPALANSPLLTSFAIEDNNFGGSVDRQLCLRSPKITDLHLSDNKFSGVLHPGTIANCTNLIHLDLGSNFFTGNLPDELFAIPSLERLSLQDNMFSGVLSENFGNLSNLLVVDMSLNGFFGEIPDVFNGLERLEKFSATSNRFSGHLPTSISNLSSLERLNLRNNSLEDEISLNCSTMSSMKSLDLGSNQFTGRNLHELSRCRKLRTLNLSKNRINGLLPDSFKELQHLYSLA…	714	2145	https://www.nature.com/articles/s41467-019-12607-6	http://cotton.hzau.edu.cn/EN/Download.htm
PlantKGA_88	Piperales	Piperaceae	Piper	nigrum	Piper nigrum	black pepper	胡椒	chromosome	Yes	基因	evmmodelPn16176	evmmodelPn161761288xxPlantKGA_88	evm.model.Pn16.176	L	partial	Pn3	31444316	31446460	-	Pfam	PF13516	Leucine Rich repeat	Leucine-rich repeat	127	142	HLNHLQVLDLSFNRLK	1.1	MSLTATAPMATTILLLSLLSMASSLPSPSQNSACHPNDLASLQGFFMGLSSRVPGWPADKYSTDCCQWHGVHCEEVGGRRRVVRLELGHYSLQGTVSDQSLSGLDQLRVLDLSHNLLAGELPSKLLHLNHLQVLDLSFNRLKGAVPSNNSLPSLQVFNISSNLFFGMFPALANSPLLTSFAIEDNNFGGSVDRQLCLRSPKITDLHLSDNKFSGVLHPGTIANCTNLIHLDLGSNFFTGNLPDELFAIPSLERLSLQDNMFSGVLSENFGNLSNLLVVDMSLNGFFGEIPDVFNGLERLEKFSATSNRFSGHLPTSISNLSSLERLNLRNNSLEDEISLNCSTMSSMKSLDLGSNQFTGRNLHELSRCRKLRTLNLSKNRINGLLPDSFKELQHLYSLA…	714	2145	https://www.nature.com/articles/s41467-019-12607-6	http://cotton.hzau.edu.cn/EN/Download.htm
PlantKGA_88	Piperales	Piperaceae	Piper	nigrum	Piper nigrum	black pepper	胡椒	chromosome	Yes	基因	evmmodelPn16178	evmmodelPn161781288xxPlantKGA_88	evm.model.Pn16.178	L	partial	Pn3	31425342	31427471	-	Pfam	PF13855	Leucine rich repeat	Leucine-rich repeat	442	501	GLQALILGNCQISGHIPPWLKMCTNLQLLDLSWNRLEGTIPNWFGDLGNLFYLDISNNYL	1.9e-08	MAPMATTIFLLSFLSIASSLPSPSQNSTCHPNDLASLQGFFMGLSSGVPGWPADKYSTDCCQWHGVHCEEVGGRRRVVRLELGHYFLQGTVSDQSLSGLDQLRVLDLSHNLLAGELPSKLLHLNHLQVLDLSFNRLKGAVPSNNSLPSLQVFNISSNLFFGMFPALANSPLLTSFAIEDNNFGGSVDRQLCLRSPKITDLHLSNNKFSGVLHPGTISNCTNLIHLDLGFNFFAGNLPDELFAIPSLERLSLQDNMFSGVLSENFGNLSNLLVVDMSLNGFFGEIPDVFNGLERLEKFSATSNRFSGHLPTSISNLSSLELLNLRNNSLEDEISLNCSTMSGMNSLDLGSNQFTGRNLHELSRCRKLRTLNLSRNRINGLLPDSFKELQHLSSLALSASG…	709	2130	https://www.nature.com/articles/s41467-019-12607-6	http://cotton.hzau.edu.cn/EN/Download.htm
PlantKGA_88	Piperales	Piperaceae	Piper	nigrum	Piper nigrum	black pepper	胡椒	chromosome	Yes	基因	evmmodelPn16178	evmmodelPn161781288xxPlantKGA_88	evm.model.Pn16.178	L	partial	Pn3	31425342	31427471	-	Pfam	PF13855	Leucine rich repeat	Leucine-rich repeat	195	255	PKITDLHLSNNKFSGVLHPGTISNCTNLIHLDLGFNFFAGNLPDELFAIPSLERLSLQDNM	1.4e-06	MAPMATTIFLLSFLSIASSLPSPSQNSTCHPNDLASLQGFFMGLSSGVPGWPADKYSTDCCQWHGVHCEEVGGRRRVVRLELGHYFLQGTVSDQSLSGLDQLRVLDLSHNLLAGELPSKLLHLNHLQVLDLSFNRLKGAVPSNNSLPSLQVFNISSNLFFGMFPALANSPLLTSFAIEDNNFGGSVDRQLCLRSPKITDLHLSNNKFSGVLHPGTISNCTNLIHLDLGFNFFAGNLPDELFAIPSLERLSLQDNMFSGVLSENFGNLSNLLVVDMSLNGFFGEIPDVFNGLERLEKFSATSNRFSGHLPTSISNLSSLELLNLRNNSLEDEISLNCSTMSGMNSLDLGSNQFTGRNLHELSRCRKLRTLNLSRNRINGLLPDSFKELQHLSSLALSASG…	709	2130	https://www.nature.com/articles/s41467-019-12607-6	http://cotton.hzau.edu.cn/EN/Download.htm
PlantKGA_88	Piperales	Piperaceae	Piper	nigrum	Piper nigrum	black pepper	胡椒	chromosome	Yes	基因	evmmodelPn16178	evmmodelPn161781288xxPlantKGA_88	evm.model.Pn16.178	L	partial	Pn3	31425342	31427471	-	Pfam	PF13855	Leucine rich repeat	Leucine-rich repeat	90	136	TVSDQSLSGLDQLRVLDLSHNLLAGELPSKLLHLNHLQVLDLSFNRL	1e-06	MAPMATTIFLLSFLSIASSLPSPSQNSTCHPNDLASLQGFFMGLSSGVPGWPADKYSTDCCQWHGVHCEEVGGRRRVVRLELGHYFLQGTVSDQSLSGLDQLRVLDLSHNLLAGELPSKLLHLNHLQVLDLSFNRLKGAVPSNNSLPSLQVFNISSNLFFGMFPALANSPLLTSFAIEDNNFGGSVDRQLCLRSPKITDLHLSNNKFSGVLHPGTISNCTNLIHLDLGFNFFAGNLPDELFAIPSLERLSLQDNMFSGVLSENFGNLSNLLVVDMSLNGFFGEIPDVFNGLERLEKFSATSNRFSGHLPTSISNLSSLELLNLRNNSLEDEISLNCSTMSGMNSLDLGSNQFTGRNLHELSRCRKLRTLNLSRNRINGLLPDSFKELQHLSSLALSASG…	709	2130	https://www.nature.com/articles/s41467-019-12607-6	http://cotton.hzau.edu.cn/EN/Download.htm
PlantKGA_88	Piperales	Piperaceae	Piper	nigrum	Piper nigrum	black pepper	胡椒	chromosome	Yes	基因	evmmodelPn16178	evmmodelPn161781288xxPlantKGA_88	evm.model.Pn16.178	L	partial	Pn3	31425342	31427471	-	Pfam	PF13855	Leucine rich repeat	Leucine-rich repeat	364	426	RKLRTLNLSRNRINGLLPDSFKELQHLSSLALSASGLSNLSDALMVLVQCKNLTTLVLSGNNF	4.1e-07	MAPMATTIFLLSFLSIASSLPSPSQNSTCHPNDLASLQGFFMGLSSGVPGWPADKYSTDCCQWHGVHCEEVGGRRRVVRLELGHYFLQGTVSDQSLSGLDQLRVLDLSHNLLAGELPSKLLHLNHLQVLDLSFNRLKGAVPSNNSLPSLQVFNISSNLFFGMFPALANSPLLTSFAIEDNNFGGSVDRQLCLRSPKITDLHLSNNKFSGVLHPGTISNCTNLIHLDLGFNFFAGNLPDELFAIPSLERLSLQDNMFSGVLSENFGNLSNLLVVDMSLNGFFGEIPDVFNGLERLEKFSATSNRFSGHLPTSISNLSSLELLNLRNNSLEDEISLNCSTMSGMNSLDLGSNQFTGRNLHELSRCRKLRTLNLSRNRINGLLPDSFKELQHLSSLALSASG…	709	2130	https://www.nature.com/articles/s41467-019-12607-6	http://cotton.hzau.edu.cn/EN/Download.htm
PlantKGA_88	Piperales	Piperaceae	Piper	nigrum	Piper nigrum	black pepper	胡椒	chromosome	Yes	基因	evmmodelPn16178	evmmodelPn161781288xxPlantKGA_88	evm.model.Pn16.178	L	partial	Pn3	31425342	31427471	-	Pfam	PF13855	Leucine rich repeat	Leucine-rich repeat	553	609	TLDLSSNNLLGPIWPEFGNLKNLHVLNLSRNDLSGSIPHELSGMTSIEALDLSYNGL	3e-09	MAPMATTIFLLSFLSIASSLPSPSQNSTCHPNDLASLQGFFMGLSSGVPGWPADKYSTDCCQWHGVHCEEVGGRRRVVRLELGHYFLQGTVSDQSLSGLDQLRVLDLSHNLLAGELPSKLLHLNHLQVLDLSFNRLKGAVPSNNSLPSLQVFNISSNLFFGMFPALANSPLLTSFAIEDNNFGGSVDRQLCLRSPKITDLHLSNNKFSGVLHPGTISNCTNLIHLDLGFNFFAGNLPDELFAIPSLERLSLQDNMFSGVLSENFGNLSNLLVVDMSLNGFFGEIPDVFNGLERLEKFSATSNRFSGHLPTSISNLSSLELLNLRNNSLEDEISLNCSTMSGMNSLDLGSNQFTGRNLHELSRCRKLRTLNLSRNRINGLLPDSFKELQHLSSLALSASG…	709	2130	https://www.nature.com/articles/s41467-019-12607-6	http://cotton.hzau.edu.cn/EN/Download.htm
PlantKGA_88	Piperales	Piperaceae	Piper	nigrum	Piper nigrum	black pepper	胡椒	chromosome	Yes	基因	evmmodelPn16178	evmmodelPn161781288xxPlantKGA_88	evm.model.Pn16.178	L	partial	Pn3	31425342	31427471	-	Pfam	PF08263	Leucine rich repeat N-terminal domain	Leucine-rich repeat-containing N-terminal, plant-type	31	68	PNDLASLQGFFMGLSSGVPGWPADKYSTDCCQWHGVHC	0.00052	MAPMATTIFLLSFLSIASSLPSPSQNSTCHPNDLASLQGFFMGLSSGVPGWPADKYSTDCCQWHGVHCEEVGGRRRVVRLELGHYFLQGTVSDQSLSGLDQLRVLDLSHNLLAGELPSKLLHLNHLQVLDLSFNRLKGAVPSNNSLPSLQVFNISSNLFFGMFPALANSPLLTSFAIEDNNFGGSVDRQLCLRSPKITDLHLSNNKFSGVLHPGTISNCTNLIHLDLGFNFFAGNLPDELFAIPSLERLSLQDNMFSGVLSENFGNLSNLLVVDMSLNGFFGEIPDVFNGLERLEKFSATSNRFSGHLPTSISNLSSLELLNLRNNSLEDEISLNCSTMSGMNSLDLGSNQFTGRNLHELSRCRKLRTLNLSRNRINGLLPDSFKELQHLSSLALSASG…	709	2130	https://www.nature.com/articles/s41467-019-12607-6	http://cotton.hzau.edu.cn/EN/Download.htm
PlantKGA_88	Piperales	Piperaceae	Piper	nigrum	Piper nigrum	black pepper	胡椒	chromosome	Yes	基因	evmmodelPn161816	evmmodelPn1618161288xxPlantKGA_88	evm.model.Pn16.1816	L	partial	Pn3	22554093	22555703	-	Pfam	PF00560	Leucine Rich Repeat	Leucine-rich repeat	447	469	NLQRLVLGDNQLSGGIPNEIGKL	1.9	MEPRHHGIILCISAIGGVSCGRRHRRVIGLEFWSFNSSGTLSPYIGNLSFLRYINLEMNNLQGAIPSEIGHLYRLRRLVLRWNSFSGEIPLNLTNCLSLEEMDLSRNNIRGKIPNQLGSLSRLHRLVLSWNSFSGEIPLNLINSLSLEEMDLSRNNIIGKIPYQLGSLSRLKALILDGNQLTGSIPSSLGNLSSLTSLLLSSNNLQGVIPSEIGHLYQLRILDLRFNSFSGEIPLNLTNCLSLEVMDLGGNNITGKIPYQLGSLSRLKTLRLYFNQLTGSIPSSLGNLSSLYILNLSSNNFNGTLPIELSHLKSLSIFDVSSNQISGTIPDSIYNLSDITSFSIGQNKLSGKLPTNLGMQLLPNLEFFHGGSNKLGGHIPISLANASKLVDLSLSHNEF…	536	1611	https://www.nature.com/articles/s41467-019-12607-6	http://cotton.hzau.edu.cn/EN/Download.htm
PlantKGA_88	Piperales	Piperaceae	Piper	nigrum	Piper nigrum	black pepper	胡椒	chromosome	Yes	基因	evmmodelPn161816	evmmodelPn1618161288xxPlantKGA_88	evm.model.Pn16.1816	L	partial	Pn3	22554093	22555703	-	Pfam	PF13855	Leucine rich repeat	Leucine-rich repeat	169	228	SRLKALILDGNQLTGSIPSSLGNLSSLTSLLLSSNNLQGVIPSEIGHLYQLRILDLRFNS	2.6e-08	MEPRHHGIILCISAIGGVSCGRRHRRVIGLEFWSFNSSGTLSPYIGNLSFLRYINLEMNNLQGAIPSEIGHLYRLRRLVLRWNSFSGEIPLNLTNCLSLEEMDLSRNNIRGKIPNQLGSLSRLHRLVLSWNSFSGEIPLNLINSLSLEEMDLSRNNIIGKIPYQLGSLSRLKALILDGNQLTGSIPSSLGNLSSLTSLLLSSNNLQGVIPSEIGHLYQLRILDLRFNSFSGEIPLNLTNCLSLEVMDLGGNNITGKIPYQLGSLSRLKTLRLYFNQLTGSIPSSLGNLSSLYILNLSSNNFNGTLPIELSHLKSLSIFDVSSNQISGTIPDSIYNLSDITSFSIGQNKLSGKLPTNLGMQLLPNLEFFHGGSNKLGGHIPISLANASKLVDLSLSHNEF…	536	1611	https://www.nature.com/articles/s41467-019-12607-6	http://cotton.hzau.edu.cn/EN/Download.htm
PlantKGA_88	Piperales	Piperaceae	Piper	nigrum	Piper nigrum	black pepper	胡椒	chromosome	Yes	基因	evmmodelPn161816	evmmodelPn1618161288xxPlantKGA_88	evm.model.Pn16.1816	L	partial	Pn3	22554093	22555703	-	Pfam	PF13855	Leucine rich repeat	Leucine-rich repeat	265	325	SRLKTLRLYFNQLTGSIPSSLGNLSSLYILNLSSNNFNGTLPIELSHLKSLSIFDVSSNQI	9e-07	MEPRHHGIILCISAIGGVSCGRRHRRVIGLEFWSFNSSGTLSPYIGNLSFLRYINLEMNNLQGAIPSEIGHLYRLRRLVLRWNSFSGEIPLNLTNCLSLEEMDLSRNNIRGKIPNQLGSLSRLHRLVLSWNSFSGEIPLNLINSLSLEEMDLSRNNIIGKIPYQLGSLSRLKALILDGNQLTGSIPSSLGNLSSLTSLLLSSNNLQGVIPSEIGHLYQLRILDLRFNSFSGEIPLNLTNCLSLEVMDLGGNNITGKIPYQLGSLSRLKTLRLYFNQLTGSIPSSLGNLSSLYILNLSSNNFNGTLPIELSHLKSLSIFDVSSNQISGTIPDSIYNLSDITSFSIGQNKLSGKLPTNLGMQLLPNLEFFHGGSNKLGGHIPISLANASKLVDLSLSHNEF…	536	1611	https://www.nature.com/articles/s41467-019-12607-6	http://cotton.hzau.edu.cn/EN/Download.htm
PlantKGA_88	Piperales	Piperaceae	Piper	nigrum	Piper nigrum	black pepper	胡椒	chromosome	Yes	基因	evmmodelPn161819	evmmodelPn1618191288xxPlantKGA_88	evm.model.Pn16.1819	L	partial	Pn3	22529777	22530520	-	Pfam	PF00560	Leucine Rich Repeat	Leucine-rich repeat	223	244	LEILHLTCNKITGKIPPALCNM	1.3	MDLDRNNIIGKIPNQLGSLPRLETLELSRNQLTGSIPSSLGNLSSLTSLSLEDNNFNGTLPIELGHLKSLASFDVASNQISGTIPDSIYNLSDMTEFVIAQNKLSGKLPTNLGMQLLPNLKFFSRDSNKLGGNIPVSLANLSKLEILSLSHNEFRGFVPNFIGCNNKEDLWYLDLRSNLLGNDDMSQFIHSLANCSRNLALLDLGDNQLAGGIPDEIGKLDGLEILHLTCNKITGKIPPALCNMSPL	247	744	https://www.nature.com/articles/s41467-019-12607-6	http://cotton.hzau.edu.cn/EN/Download.htm
PlantKGA_88	Piperales	Piperaceae	Piper	nigrum	Piper nigrum	black pepper	胡椒	chromosome	Yes	基因	evmmodelPn161819	evmmodelPn1618191288xxPlantKGA_88	evm.model.Pn16.1819	L	partial	Pn3	22529777	22530520	-	Pfam	PF13855	Leucine rich repeat	Leucine-rich repeat	2	56	DLDRNNIIGKIPNQLGSLPRLETLELSRNQLTGSIPSSLGNLSSLTSLSLEDNNF	4.4e-08	MDLDRNNIIGKIPNQLGSLPRLETLELSRNQLTGSIPSSLGNLSSLTSLSLEDNNFNGTLPIELGHLKSLASFDVASNQISGTIPDSIYNLSDMTEFVIAQNKLSGKLPTNLGMQLLPNLKFFSRDSNKLGGNIPVSLANLSKLEILSLSHNEFRGFVPNFIGCNNKEDLWYLDLRSNLLGNDDMSQFIHSLANCSRNLALLDLGDNQLAGGIPDEIGKLDGLEILHLTCNKITGKIPPALCNMSPL	247	744	https://www.nature.com/articles/s41467-019-12607-6	http://cotton.hzau.edu.cn/EN/Download.htm
PlantKGA_88	Piperales	Piperaceae	Piper	nigrum	Piper nigrum	black pepper	胡椒	chromosome	Yes	基因	evmmodelPn161820	evmmodelPn1618201288xxPlantKGA_88	evm.model.Pn16.1820	L	partial	Pn3	22518002	22518946	-	Pfam	PF13855	Leucine rich repeat	Leucine-rich repeat	249	308	GLMVLHLTGNKIAGKIQPSLCNIASLEELYLGNNQLVGTIPGCLGDTLNLTNLDLSHNKL	4.2e-07	MLDLSGNSFGGEIPLNLTNCLSLEEMDLSRNNITGKIPNQLGSLSSLKELNLYRNQLTGSIPSSLGNLSYLTSLDLSLNHLNGTLPIELGHLKSLAIFDVSSNQISGTIPDSIYNLSTIYFFSVYQNKLSGKLPTNLGMELLPNLEFFNVSSNKLGGHIPVCLVNASKLEILSLSHNEFKGFVPNFIGCSMSLWYLDLRSNQLGSGGTNDDMSQFIQSLANCSRTLNVLALGDNQLSGGIPDEIGKLNGLMVLHLTGNKIAGKIQPSLCNIASLEELYLGNNQLVGTIPGCLGDTLNLTNLDLSHNKLLGGNMT	314	945	https://www.nature.com/articles/s41467-019-12607-6	http://cotton.hzau.edu.cn/EN/Download.htm
PlantKGA_88	Piperales	Piperaceae	Piper	nigrum	Piper nigrum	black pepper	胡椒	chromosome	Yes	基因	evmmodelPn161820	evmmodelPn1618201288xxPlantKGA_88	evm.model.Pn16.1820	L	partial	Pn3	22518002	22518946	-	Pfam	PF13855	Leucine rich repeat	Leucine-rich repeat	46	105	SLKELNLYRNQLTGSIPSSLGNLSYLTSLDLSLNHLNGTLPIELGHLKSLAIFDVSSNQI	1.4e-06	MLDLSGNSFGGEIPLNLTNCLSLEEMDLSRNNITGKIPNQLGSLSSLKELNLYRNQLTGSIPSSLGNLSYLTSLDLSLNHLNGTLPIELGHLKSLAIFDVSSNQISGTIPDSIYNLSTIYFFSVYQNKLSGKLPTNLGMELLPNLEFFNVSSNKLGGHIPVCLVNASKLEILSLSHNEFKGFVPNFIGCSMSLWYLDLRSNQLGSGGTNDDMSQFIQSLANCSRTLNVLALGDNQLSGGIPDEIGKLNGLMVLHLTGNKIAGKIQPSLCNIASLEELYLGNNQLVGTIPGCLGDTLNLTNLDLSHNKLLGGNMT	314	945	https://www.nature.com/articles/s41467-019-12607-6	http://cotton.hzau.edu.cn/EN/Download.htm
PlantKGA_88	Piperales	Piperaceae	Piper	nigrum	Piper nigrum	black pepper	胡椒	chromosome	Yes	基因	evmmodelPn161820	evmmodelPn1618201288xxPlantKGA_88	evm.model.Pn16.1820	L	partial	Pn3	22518002	22518946	-	Pfam	PF13855	Leucine rich repeat	Leucine-rich repeat	143	203	PNLEFFNVSSNKLGGHIPVCLVNASKLEILSLSHNEFKGFVPNFIGCSMSLWYLDLRSNQL	6.3e-07	MLDLSGNSFGGEIPLNLTNCLSLEEMDLSRNNITGKIPNQLGSLSSLKELNLYRNQLTGSIPSSLGNLSYLTSLDLSLNHLNGTLPIELGHLKSLAIFDVSSNQISGTIPDSIYNLSTIYFFSVYQNKLSGKLPTNLGMELLPNLEFFNVSSNKLGGHIPVCLVNASKLEILSLSHNEFKGFVPNFIGCSMSLWYLDLRSNQLGSGGTNDDMSQFIQSLANCSRTLNVLALGDNQLSGGIPDEIGKLNGLMVLHLTGNKIAGKIQPSLCNIASLEELYLGNNQLVGTIPGCLGDTLNLTNLDLSHNKLLGGNMT	314	945	https://www.nature.com/articles/s41467-019-12607-6	http://cotton.hzau.edu.cn/EN/Download.htm
PlantKGA_88	Piperales	Piperaceae	Piper	nigrum	Piper nigrum	black pepper	胡椒	chromosome	Yes	基因	evmmodelPn161820	evmmodelPn1618201288xxPlantKGA_88	evm.model.Pn16.1820	L	partial	Pn3	22518002	22518946	-	Pfam	PF00560	Leucine Rich Repeat	Leucine-rich repeat	22	44	SLEEMDLSRNNITGKIPNQLGSL	0.29	MLDLSGNSFGGEIPLNLTNCLSLEEMDLSRNNITGKIPNQLGSLSSLKELNLYRNQLTGSIPSSLGNLSYLTSLDLSLNHLNGTLPIELGHLKSLAIFDVSSNQISGTIPDSIYNLSTIYFFSVYQNKLSGKLPTNLGMELLPNLEFFNVSSNKLGGHIPVCLVNASKLEILSLSHNEFKGFVPNFIGCSMSLWYLDLRSNQLGSGGTNDDMSQFIQSLANCSRTLNVLALGDNQLSGGIPDEIGKLNGLMVLHLTGNKIAGKIQPSLCNIASLEELYLGNNQLVGTIPGCLGDTLNLTNLDLSHNKLLGGNMT	314	945	https://www.nature.com/articles/s41467-019-12607-6	http://cotton.hzau.edu.cn/EN/Download.htm
PlantKGA_88	Piperales	Piperaceae	Piper	nigrum	Piper nigrum	black pepper	胡椒	chromosome	Yes	基因	evmmodelPn161825	evmmodelPn1618251288xxPlantKGA_88	evm.model.Pn16.1825	L	partial	Pn3	22495854	22496450	-	Pfam	PF13855	Leucine rich repeat	Leucine-rich repeat	22	81	SLEEMDLSRNNITGKIPNQLGSLSSLKELNLYRNQLTGSIPSSLGNLSSLTSLDLSLNHL	6.3e-09	MLDLSGNSFGGEIPLNLTNCLSLEEMDLSRNNITGKIPNQLGSLSSLKELNLYRNQLTGSIPSSLGNLSSLTSLDLSLNHLNGTLPIELGHLKSLAIFDVSSNQISGTIPDSIYNLSTIYFFSIYQNKLSGKLPTNLGMELLPNLEFFNISSNKLGGHIPVCLVNASKLEILSLSHNEFKGFVPNFIGCSMSLWYLDL	198	597	https://www.nature.com/articles/s41467-019-12607-6	http://cotton.hzau.edu.cn/EN/Download.htm
PlantKGA_88	Piperales	Piperaceae	Piper	nigrum	Piper nigrum	black pepper	胡椒	chromosome	Yes	基因	evmmodelPn16183	evmmodelPn161831288xxPlantKGA_88	evm.model.Pn16.183	L	partial	Pn3	31399505	31401625	-	Pfam	PF08263	Leucine rich repeat N-terminal domain	Leucine-rich repeat-containing N-terminal, plant-type	33	69	SKDLEALRAFFHGLRSGVPSWPGGNSTDCCGWHGVNC	5.9e-06	MAMVCRQWYLLHLLVSIFLQSHVLHSQNLTCHSKDLEALRAFFHGLRSGVPSWPGGNSTDCCGWHGVNCEGSDGRVVSLELGGNSLRGPISESLSGLDQLRVLNLSLNFLDGNLPSKLLHMEKLEMLDLSVNILKGAVPSNDSLPSLQLFNISVNLFTGLFPILANSPRLISFTIQGNRFVGPVDKEICRLSPEITGLHLSGNYFSGILHAGIANCTNLRHLELRSNALVGNLPDELFGIVSLEHLSLQDNMLSGLLSEKIGNLSNLLIVDLSFNRFYGRIPDVFGKLERLKHFSAISNGFVGHLPASLSNVSTLQLINLRNNSLDGEINLDCATMISLNSLDLGINQFTGRNLHKLSHCRELRTLNLARNKLDGLLPDSFKELQHLSYLALSGSGLSN…	706	2121	https://www.nature.com/articles/s41467-019-12607-6	http://cotton.hzau.edu.cn/EN/Download.htm
PlantKGA_88	Piperales	Piperaceae	Piper	nigrum	Piper nigrum	black pepper	胡椒	chromosome	Yes	基因	evmmodelPn16183	evmmodelPn161831288xxPlantKGA_88	evm.model.Pn16.183	L	partial	Pn3	31399505	31401625	-	Pfam	PF13855	Leucine rich repeat	Leucine-rich repeat	194	253	EITGLHLSGNYFSGILHAGIANCTNLRHLELRSNALVGNLPDELFGIVSLEHLSLQDNML	6.2e-07	MAMVCRQWYLLHLLVSIFLQSHVLHSQNLTCHSKDLEALRAFFHGLRSGVPSWPGGNSTDCCGWHGVNCEGSDGRVVSLELGGNSLRGPISESLSGLDQLRVLNLSLNFLDGNLPSKLLHMEKLEMLDLSVNILKGAVPSNDSLPSLQLFNISVNLFTGLFPILANSPRLISFTIQGNRFVGPVDKEICRLSPEITGLHLSGNYFSGILHAGIANCTNLRHLELRSNALVGNLPDELFGIVSLEHLSLQDNMLSGLLSEKIGNLSNLLIVDLSFNRFYGRIPDVFGKLERLKHFSAISNGFVGHLPASLSNVSTLQLINLRNNSLDGEINLDCATMISLNSLDLGINQFTGRNLHKLSHCRELRTLNLARNKLDGLLPDSFKELQHLSYLALSGSGLSN…	706	2121	https://www.nature.com/articles/s41467-019-12607-6	http://cotton.hzau.edu.cn/EN/Download.htm
PlantKGA_88	Piperales	Piperaceae	Piper	nigrum	Piper nigrum	black pepper	胡椒	chromosome	Yes	基因	evmmodelPn16183	evmmodelPn161831288xxPlantKGA_88	evm.model.Pn16.183	L	partial	Pn3	31399505	31401625	-	Pfam	PF13855	Leucine rich repeat	Leucine-rich repeat	361	423	RELRTLNLARNKLDGLLPDSFKELQHLSYLALSGSGLSNLSAALMVLVQCKNLTTLALSRNNF	5.3e-07	MAMVCRQWYLLHLLVSIFLQSHVLHSQNLTCHSKDLEALRAFFHGLRSGVPSWPGGNSTDCCGWHGVNCEGSDGRVVSLELGGNSLRGPISESLSGLDQLRVLNLSLNFLDGNLPSKLLHMEKLEMLDLSVNILKGAVPSNDSLPSLQLFNISVNLFTGLFPILANSPRLISFTIQGNRFVGPVDKEICRLSPEITGLHLSGNYFSGILHAGIANCTNLRHLELRSNALVGNLPDELFGIVSLEHLSLQDNMLSGLLSEKIGNLSNLLIVDLSFNRFYGRIPDVFGKLERLKHFSAISNGFVGHLPASLSNVSTLQLINLRNNSLDGEINLDCATMISLNSLDLGINQFTGRNLHKLSHCRELRTLNLARNKLDGLLPDSFKELQHLSYLALSGSGLSN…	706	2121	https://www.nature.com/articles/s41467-019-12607-6	http://cotton.hzau.edu.cn/EN/Download.htm
PlantKGA_88	Piperales	Piperaceae	Piper	nigrum	Piper nigrum	black pepper	胡椒	chromosome	Yes	基因	evmmodelPn16183	evmmodelPn161831288xxPlantKGA_88	evm.model.Pn16.183	L	partial	Pn3	31399505	31401625	-	Pfam	PF13855	Leucine rich repeat	Leucine-rich repeat	462	519	TNLQLLDLSWNRLEGTIPNWFGDLDNLFYLDISNNSLSGEVPRSMTKLKSLISLKISR	4.7e-09	MAMVCRQWYLLHLLVSIFLQSHVLHSQNLTCHSKDLEALRAFFHGLRSGVPSWPGGNSTDCCGWHGVNCEGSDGRVVSLELGGNSLRGPISESLSGLDQLRVLNLSLNFLDGNLPSKLLHMEKLEMLDLSVNILKGAVPSNDSLPSLQLFNISVNLFTGLFPILANSPRLISFTIQGNRFVGPVDKEICRLSPEITGLHLSGNYFSGILHAGIANCTNLRHLELRSNALVGNLPDELFGIVSLEHLSLQDNMLSGLLSEKIGNLSNLLIVDLSFNRFYGRIPDVFGKLERLKHFSAISNGFVGHLPASLSNVSTLQLINLRNNSLDGEINLDCATMISLNSLDLGINQFTGRNLHKLSHCRELRTLNLARNKLDGLLPDSFKELQHLSYLALSGSGLSN…	706	2121	https://www.nature.com/articles/s41467-019-12607-6	http://cotton.hzau.edu.cn/EN/Download.htm
PlantKGA_88	Piperales	Piperaceae	Piper	nigrum	Piper nigrum	black pepper	胡椒	chromosome	Yes	基因	evmmodelPn16183	evmmodelPn161831288xxPlantKGA_88	evm.model.Pn16.183	L	partial	Pn3	31399505	31401625	-	Pfam	PF13855	Leucine rich repeat	Leucine-rich repeat	550	606	TLDLSSNNLIGPIWPEFGNLKELHVLNLGRNDLSGSIPHELSGMTSIEALDLSYNGL	3.2e-08	MAMVCRQWYLLHLLVSIFLQSHVLHSQNLTCHSKDLEALRAFFHGLRSGVPSWPGGNSTDCCGWHGVNCEGSDGRVVSLELGGNSLRGPISESLSGLDQLRVLNLSLNFLDGNLPSKLLHMEKLEMLDLSVNILKGAVPSNDSLPSLQLFNISVNLFTGLFPILANSPRLISFTIQGNRFVGPVDKEICRLSPEITGLHLSGNYFSGILHAGIANCTNLRHLELRSNALVGNLPDELFGIVSLEHLSLQDNMLSGLLSEKIGNLSNLLIVDLSFNRFYGRIPDVFGKLERLKHFSAISNGFVGHLPASLSNVSTLQLINLRNNSLDGEINLDCATMISLNSLDLGINQFTGRNLHKLSHCRELRTLNLARNKLDGLLPDSFKELQHLSYLALSGSGLSN…	706	2121	https://www.nature.com/articles/s41467-019-12607-6	http://cotton.hzau.edu.cn/EN/Download.htm
PlantKGA_88	Piperales	Piperaceae	Piper	nigrum	Piper nigrum	black pepper	胡椒	chromosome	Yes	基因	evmmodelPn161892	evmmodelPn1618921288xxPlantKGA_88	evm.model.Pn16.1892	L	partial	Pn3	21843131	21843661	-	Pfam	PF13516	Leucine Rich repeat	Leucine-rich repeat	160	174	NLTHLDLSQNKLLGD	0.88	MQLLPNLEEFLRGSNKLGGRILVSLANASNLASLSLSHNEFRGYVPNFMGCNNKEGLHSLNLRSNQLGSGGTNDDMSQFSHSLANCSHNLQRLILVDNQLSGGIPDEIGKHNSLMVHLSGNKITGKIPPALCNIARLEQLYPGNNQLVGAIPECLGDTLNLTHLDLSQNKLLGDMA	176	531	https://www.nature.com/articles/s41467-019-12607-6	http://cotton.hzau.edu.cn/EN/Download.htm
PlantKGA_88	Piperales	Piperaceae	Piper	nigrum	Piper nigrum	black pepper	胡椒	chromosome	Yes	基因	evmmodelPn161911	evmmodelPn1619111288xxPlantKGA_88	evm.model.Pn16.1911	L	partial	Pn3	21681751	21682284	-	Pfam	PF00560	Leucine Rich Repeat	Leucine-rich repeat	160	173	NLTHLDLSQNKLLG	1.1	MQLLPNLEEFLRGSNKLGGHILVSLANASNLASLSLSHNEFRGSVPNFMGCNNKEGLQSLNLRSNQLGSGGMNDDMSQFSHSLANCSRNLQRLILGDNQLSGSIPDEIGKHNGLMVHLSGNKITGKIPPALCNIARLEQLYPGNNQLVGAIPERLGDTLNLTHLDLSQNKLLGGDMA	177	534	https://www.nature.com/articles/s41467-019-12607-6	http://cotton.hzau.edu.cn/EN/Download.htm
PlantKGA_88	Piperales	Piperaceae	Piper	nigrum	Piper nigrum	black pepper	胡椒	chromosome	Yes	基因	evmmodelPn161911	evmmodelPn1619111288xxPlantKGA_88	evm.model.Pn16.1911	L	partial	Pn3	21681751	21682284	-	Pfam	PF13516	Leucine Rich repeat	Leucine-rich repeat	57	72	LQSLNLRSNQLGSGGM	0.33	MQLLPNLEEFLRGSNKLGGHILVSLANASNLASLSLSHNEFRGSVPNFMGCNNKEGLQSLNLRSNQLGSGGMNDDMSQFSHSLANCSRNLQRLILGDNQLSGSIPDEIGKHNGLMVHLSGNKITGKIPPALCNIARLEQLYPGNNQLVGAIPERLGDTLNLTHLDLSQNKLLGGDMA	177	534	https://www.nature.com/articles/s41467-019-12607-6	http://cotton.hzau.edu.cn/EN/Download.htm
PlantKGA_88	Piperales	Piperaceae	Piper	nigrum	Piper nigrum	black pepper	胡椒	chromosome	Yes	基因	evmmodelPn161951	evmmodelPn1619511288xxPlantKGA_88	evm.model.Pn16.1951	L	partial	Pn3	21262205	21263857	-	Pfam	PF00560	Leucine Rich Repeat	Leucine-rich repeat	95	117	SLEEMDLSGNNITGKIPNQLGSL	0.35	MASWNDSLHFCDWEGVSCDRRHRRVTGLDFLFFNLSGTLSPYIGNLSCLRSINLDANLQGEIPSEIGRLYRLRRLDLSFNSFSGEIPLNLTNCLSLEEMDLSGNNITGKIPNQLGSLSRLKELYLYDNQLTGSIPTSLGNLSSLVFLYIGSNNLQGVIPSEIGRLYRLRRLDLSFNSFIGEIPLNLKNCLSLEEMNLIGNKITGKIPNQLGSLSRLEGLYLGGNQLTGSIPSSLGNLSSLVFLHIGSNNLQGAIPSEIGCLYRLSGLYLSSNSFSGEIPLNLTNCLSLEEMDLSDNNITGKIPNQLGSLPRLEGLNLGGNQLTGSIPSSLGNLSSLTHLHLSYNNLNGTIPDSIYNLSEITELEIAQNKLSGKLPTNLGMLPNLKYFYGDSNKLGGHIP…	550	1653	https://www.nature.com/articles/s41467-019-12607-6	http://cotton.hzau.edu.cn/EN/Download.htm
PlantKGA_88	Piperales	Piperaceae	Piper	nigrum	Piper nigrum	black pepper	胡椒	chromosome	Yes	基因	evmmodelPn161951	evmmodelPn1619511288xxPlantKGA_88	evm.model.Pn16.1951	L	partial	Pn3	21262205	21263857	-	Pfam	PF00560	Leucine Rich Repeat	Leucine-rich repeat	287	309	SLEEMDLSDNNITGKIPNQLGSL	0.62	MASWNDSLHFCDWEGVSCDRRHRRVTGLDFLFFNLSGTLSPYIGNLSCLRSINLDANLQGEIPSEIGRLYRLRRLDLSFNSFSGEIPLNLTNCLSLEEMDLSGNNITGKIPNQLGSLSRLKELYLYDNQLTGSIPTSLGNLSSLVFLYIGSNNLQGVIPSEIGRLYRLRRLDLSFNSFIGEIPLNLKNCLSLEEMNLIGNKITGKIPNQLGSLSRLEGLYLGGNQLTGSIPSSLGNLSSLVFLHIGSNNLQGAIPSEIGCLYRLSGLYLSSNSFSGEIPLNLTNCLSLEEMDLSDNNITGKIPNQLGSLPRLEGLNLGGNQLTGSIPSSLGNLSSLTHLHLSYNNLNGTIPDSIYNLSEITELEIAQNKLSGKLPTNLGMLPNLKYFYGDSNKLGGHIP…	550	1653	https://www.nature.com/articles/s41467-019-12607-6	http://cotton.hzau.edu.cn/EN/Download.htm
PlantKGA_88	Piperales	Piperaceae	Piper	nigrum	Piper nigrum	black pepper	胡椒	chromosome	Yes	基因	evmmodelPn161951	evmmodelPn1619511288xxPlantKGA_88	evm.model.Pn16.1951	L	partial	Pn3	21262205	21263857	-	Pfam	PF00560	Leucine Rich Repeat	Leucine-rich repeat	71	93	RLRRLDLSFNSFSGEIPLNLTNC	1.4	MASWNDSLHFCDWEGVSCDRRHRRVTGLDFLFFNLSGTLSPYIGNLSCLRSINLDANLQGEIPSEIGRLYRLRRLDLSFNSFSGEIPLNLTNCLSLEEMDLSGNNITGKIPNQLGSLSRLKELYLYDNQLTGSIPTSLGNLSSLVFLYIGSNNLQGVIPSEIGRLYRLRRLDLSFNSFIGEIPLNLKNCLSLEEMNLIGNKITGKIPNQLGSLSRLEGLYLGGNQLTGSIPSSLGNLSSLVFLHIGSNNLQGAIPSEIGCLYRLSGLYLSSNSFSGEIPLNLTNCLSLEEMDLSDNNITGKIPNQLGSLPRLEGLNLGGNQLTGSIPSSLGNLSSLTHLHLSYNNLNGTIPDSIYNLSEITELEIAQNKLSGKLPTNLGMLPNLKYFYGDSNKLGGHIP…	550	1653	https://www.nature.com/articles/s41467-019-12607-6	http://cotton.hzau.edu.cn/EN/Download.htm
PlantKGA_88	Piperales	Piperaceae	Piper	nigrum	Piper nigrum	black pepper	胡椒	chromosome	Yes	基因	evmmodelPn161951	evmmodelPn1619511288xxPlantKGA_88	evm.model.Pn16.1951	L	partial	Pn3	21262205	21263857	-	Pfam	PF13855	Leucine rich repeat	Leucine-rich repeat	315	370	LNLGGNQLTGSIPSSLGNLSSLTHLHLSYNNLNGTIPDSIYNLSEITELEIAQNKL	1.5e-07	MASWNDSLHFCDWEGVSCDRRHRRVTGLDFLFFNLSGTLSPYIGNLSCLRSINLDANLQGEIPSEIGRLYRLRRLDLSFNSFSGEIPLNLTNCLSLEEMDLSGNNITGKIPNQLGSLSRLKELYLYDNQLTGSIPTSLGNLSSLVFLYIGSNNLQGVIPSEIGRLYRLRRLDLSFNSFIGEIPLNLKNCLSLEEMNLIGNKITGKIPNQLGSLSRLEGLYLGGNQLTGSIPSSLGNLSSLVFLHIGSNNLQGAIPSEIGCLYRLSGLYLSSNSFSGEIPLNLTNCLSLEEMDLSDNNITGKIPNQLGSLPRLEGLNLGGNQLTGSIPSSLGNLSSLTHLHLSYNNLNGTIPDSIYNLSEITELEIAQNKLSGKLPTNLGMLPNLKYFYGDSNKLGGHIP…	550	1653	https://www.nature.com/articles/s41467-019-12607-6	http://cotton.hzau.edu.cn/EN/Download.htm
PlantKGA_88	Piperales	Piperaceae	Piper	nigrum	Piper nigrum	black pepper	胡椒	chromosome	Yes	基因	evmmodelPn161951	evmmodelPn1619511288xxPlantKGA_88	evm.model.Pn16.1951	L	partial	Pn3	21262205	21263857	-	Pfam	PF13855	Leucine rich repeat	Leucine-rich repeat	460	520	RNLKYLLLGDNQLSGGIPDEIAKLNGLMVLHLTGNKITGKIPPALCNIAPLKGLYLGNNQL	6.3e-07	MASWNDSLHFCDWEGVSCDRRHRRVTGLDFLFFNLSGTLSPYIGNLSCLRSINLDANLQGEIPSEIGRLYRLRRLDLSFNSFSGEIPLNLTNCLSLEEMDLSGNNITGKIPNQLGSLSRLKELYLYDNQLTGSIPTSLGNLSSLVFLYIGSNNLQGVIPSEIGRLYRLRRLDLSFNSFIGEIPLNLKNCLSLEEMNLIGNKITGKIPNQLGSLSRLEGLYLGGNQLTGSIPSSLGNLSSLVFLHIGSNNLQGAIPSEIGCLYRLSGLYLSSNSFSGEIPLNLTNCLSLEEMDLSDNNITGKIPNQLGSLPRLEGLNLGGNQLTGSIPSSLGNLSSLTHLHLSYNNLNGTIPDSIYNLSEITELEIAQNKLSGKLPTNLGMLPNLKYFYGDSNKLGGHIP…	550	1653	https://www.nature.com/articles/s41467-019-12607-6	http://cotton.hzau.edu.cn/EN/Download.htm
PlantKGA_88	Piperales	Piperaceae	Piper	nigrum	Piper nigrum	black pepper	胡椒	chromosome	Yes	基因	evmmodelPn161951	evmmodelPn1619511288xxPlantKGA_88	evm.model.Pn16.1951	L	partial	Pn3	21262205	21263857	-	Pfam	PF13855	Leucine rich repeat	Leucine-rich repeat	118	177	SRLKELYLYDNQLTGSIPTSLGNLSSLVFLYIGSNNLQGVIPSEIGRLYRLRRLDLSFNS	1.1e-07	MASWNDSLHFCDWEGVSCDRRHRRVTGLDFLFFNLSGTLSPYIGNLSCLRSINLDANLQGEIPSEIGRLYRLRRLDLSFNSFSGEIPLNLTNCLSLEEMDLSGNNITGKIPNQLGSLSRLKELYLYDNQLTGSIPTSLGNLSSLVFLYIGSNNLQGVIPSEIGRLYRLRRLDLSFNSFIGEIPLNLKNCLSLEEMNLIGNKITGKIPNQLGSLSRLEGLYLGGNQLTGSIPSSLGNLSSLVFLHIGSNNLQGAIPSEIGCLYRLSGLYLSSNSFSGEIPLNLTNCLSLEEMDLSDNNITGKIPNQLGSLPRLEGLNLGGNQLTGSIPSSLGNLSSLTHLHLSYNNLNGTIPDSIYNLSEITELEIAQNKLSGKLPTNLGMLPNLKYFYGDSNKLGGHIP…	550	1653	https://www.nature.com/articles/s41467-019-12607-6	http://cotton.hzau.edu.cn/EN/Download.htm
PlantKGA_88	Piperales	Piperaceae	Piper	nigrum	Piper nigrum	black pepper	胡椒	chromosome	Yes	基因	evmmodelPn161975	evmmodelPn1619751288xxPlantKGA_88	evm.model.Pn16.1975	L	partial	Pn3	21071031	21072317	-	Pfam	PF00560	Leucine Rich Repeat	Leucine-rich repeat	271	292	LEELYLDNNELVGTIPACLQDL	0.49	MLFLSYNSFSGEIPPILANCFSLQVIDLFGNQISGKVPHQLGSLSKLKTLDLGSYLLTGRSIPSSIGNLSSLTSLYLGSNNLNGTLPIELGSLKSLTNFWVGSNQISGTIPDSIYNLSSITDFVICRNKVSGKLPINLGNEVLPNIEVFFVDSNKFRGQIPGSLANGSNLLALSLSRNEFCGFMPDFGRSCDELLYLNLRHNRLSGLTNIGGIASLANCTNLMLLALGDNHHIVESIPNEIGKLVRLTVLDLSGNEMGGKISPSLCNLTMLEELYLDNNELVGTIPACLQDLENLQKLEFSENKLGSLM	309	1287	https://www.nature.com/articles/s41467-019-12607-6	http://cotton.hzau.edu.cn/EN/Download.htm
PlantKGA_88	Piperales	Piperaceae	Piper	nigrum	Piper nigrum	black pepper	胡椒	chromosome	Yes	基因	evmmodelPn161975	evmmodelPn1619751288xxPlantKGA_88	evm.model.Pn16.1975	L	partial	Pn3	21071031	21072317	-	Pfam	PF00560	Leucine Rich Repeat	Leucine-rich repeat	246	268	RLTVLDLSGNEMGGKISPSLCNL	0.084	MLFLSYNSFSGEIPPILANCFSLQVIDLFGNQISGKVPHQLGSLSKLKTLDLGSYLLTGRSIPSSIGNLSSLTSLYLGSNNLNGTLPIELGSLKSLTNFWVGSNQISGTIPDSIYNLSSITDFVICRNKVSGKLPINLGNEVLPNIEVFFVDSNKFRGQIPGSLANGSNLLALSLSRNEFCGFMPDFGRSCDELLYLNLRHNRLSGLTNIGGIASLANCTNLMLLALGDNHHIVESIPNEIGKLVRLTVLDLSGNEMGGKISPSLCNLTMLEELYLDNNELVGTIPACLQDLENLQKLEFSENKLGSLM	309	1287	https://www.nature.com/articles/s41467-019-12607-6	http://cotton.hzau.edu.cn/EN/Download.htm
PlantKGA_88	Piperales	Piperaceae	Piper	nigrum	Piper nigrum	black pepper	胡椒	chromosome	Yes	基因	evmmodelPn161977	evmmodelPn1619771288xxPlantKGA_88	evm.model.Pn16.1977	L	partial	Pn3	21046209	21047722	-	Pfam	PF13855	Leucine rich repeat	Leucine-rich repeat	215	274	TLQTLDLAVSQLTGSIPSAFGNLSSLPSLYLGSNNLNGTLPIELGSLKSLTNFWVGSNQI	1.9e-06	MDICHHGVTLHFCNWKGVSCGHHSRQVIGLELSSMSLGGTLSNHVGNLSFLRYINLKFNLQGAIPSEMGRLFRLRMLFLSYNSFSGEIPLILANCFSLQVIDLFGNQLSGKVPRQLGSLSKLKTLDLSSNLLTGNQLGSLSKLQTLDLSSNYQLTGTIPSSLGSLSSLTRLVLYSNSHSGEIPLNLSHCFSLTEIHLNENQLARKIPGELGSLTTLQTLDLAVSQLTGSIPSAFGNLSSLPSLYLGSNNLNGTLPIELGSLKSLTNFWVGSNQISGTIPDSIYNNLSSITDFVICRNKVSGKLPTNLDNEVLPNIEVFFVDSKKFGGQIPVSLTNASNLLALSLSRNEFCGFIPDFGRSCNELLYLNLRHNRLSGLTNIGGIASLANCTNLMLLALGDN…	478	1514	https://www.nature.com/articles/s41467-019-12607-6	http://cotton.hzau.edu.cn/EN/Download.htm
PlantKGA_88	Piperales	Piperaceae	Piper	nigrum	Piper nigrum	black pepper	胡椒	chromosome	Yes	基因	evmmodelPn161977	evmmodelPn1619771288xxPlantKGA_88	evm.model.Pn16.1977	L	partial	Pn3	21046209	21047722	-	Pfam	PF00560	Leucine Rich Repeat	Leucine-rich repeat	121	143	KLKTLDLSSNLLTGNQLGSLSKL	0.83	MDICHHGVTLHFCNWKGVSCGHHSRQVIGLELSSMSLGGTLSNHVGNLSFLRYINLKFNLQGAIPSEMGRLFRLRMLFLSYNSFSGEIPLILANCFSLQVIDLFGNQLSGKVPRQLGSLSKLKTLDLSSNLLTGNQLGSLSKLQTLDLSSNYQLTGTIPSSLGSLSSLTRLVLYSNSHSGEIPLNLSHCFSLTEIHLNENQLARKIPGELGSLTTLQTLDLAVSQLTGSIPSAFGNLSSLPSLYLGSNNLNGTLPIELGSLKSLTNFWVGSNQISGTIPDSIYNNLSSITDFVICRNKVSGKLPTNLDNEVLPNIEVFFVDSKKFGGQIPVSLTNASNLLALSLSRNEFCGFIPDFGRSCNELLYLNLRHNRLSGLTNIGGIASLANCTNLMLLALGDN…	478	1514	https://www.nature.com/articles/s41467-019-12607-6	http://cotton.hzau.edu.cn/EN/Download.htm
PlantKGA_88	Piperales	Piperaceae	Piper	nigrum	Piper nigrum	black pepper	胡椒	chromosome	Yes	基因	evmmodelPn161977	evmmodelPn1619771288xxPlantKGA_88	evm.model.Pn16.1977	L	partial	Pn3	21046209	21047722	-	Pfam	PF00560	Leucine Rich Repeat	Leucine-rich repeat	440	461	LEELYLDNNELVGSIPACLQDL	0.89	MDICHHGVTLHFCNWKGVSCGHHSRQVIGLELSSMSLGGTLSNHVGNLSFLRYINLKFNLQGAIPSEMGRLFRLRMLFLSYNSFSGEIPLILANCFSLQVIDLFGNQLSGKVPRQLGSLSKLKTLDLSSNLLTGNQLGSLSKLQTLDLSSNYQLTGTIPSSLGSLSSLTRLVLYSNSHSGEIPLNLSHCFSLTEIHLNENQLARKIPGELGSLTTLQTLDLAVSQLTGSIPSAFGNLSSLPSLYLGSNNLNGTLPIELGSLKSLTNFWVGSNQISGTIPDSIYNNLSSITDFVICRNKVSGKLPTNLDNEVLPNIEVFFVDSKKFGGQIPVSLTNASNLLALSLSRNEFCGFIPDFGRSCNELLYLNLRHNRLSGLTNIGGIASLANCTNLMLLALGDN…	478	1514	https://www.nature.com/articles/s41467-019-12607-6	http://cotton.hzau.edu.cn/EN/Download.htm
PlantKGA_88	Piperales	Piperaceae	Piper	nigrum	Piper nigrum	black pepper	胡椒	chromosome	Yes	基因	evmmodelPn161977	evmmodelPn1619771288xxPlantKGA_88	evm.model.Pn16.1977	L	partial	Pn3	21046209	21047722	-	Pfam	PF00560	Leucine Rich Repeat	Leucine-rich repeat	415	437	RLTVLDLSGNEMGGKISPSLCNL	0.15	MDICHHGVTLHFCNWKGVSCGHHSRQVIGLELSSMSLGGTLSNHVGNLSFLRYINLKFNLQGAIPSEMGRLFRLRMLFLSYNSFSGEIPLILANCFSLQVIDLFGNQLSGKVPRQLGSLSKLKTLDLSSNLLTGNQLGSLSKLQTLDLSSNYQLTGTIPSSLGSLSSLTRLVLYSNSHSGEIPLNLSHCFSLTEIHLNENQLARKIPGELGSLTTLQTLDLAVSQLTGSIPSAFGNLSSLPSLYLGSNNLNGTLPIELGSLKSLTNFWVGSNQISGTIPDSIYNNLSSITDFVICRNKVSGKLPTNLDNEVLPNIEVFFVDSKKFGGQIPVSLTNASNLLALSLSRNEFCGFIPDFGRSCNELLYLNLRHNRLSGLTNIGGIASLANCTNLMLLALGDN…	478	1514	https://www.nature.com/articles/s41467-019-12607-6	http://cotton.hzau.edu.cn/EN/Download.htm
PlantKGA_88	Piperales	Piperaceae	Piper	nigrum	Piper nigrum	black pepper	胡椒	chromosome	Yes	基因	evmmodelPn161982	evmmodelPn1619821288xxPlantKGA_88	evm.model.Pn16.1982	L	partial	Pn3	20985256	20986920	-	Pfam	PF00560	Leucine Rich Repeat	Leucine-rich repeat	489	509	LRVLHLTGNKIIGKIPPALCN	0.77	MGVSCSSRLRRVTGLDFSSFNLSGTLSNYIGNLSFLRYINLRNEEYWQPWEGSNYLQGAIPSEIGCLCRLRRLDLSFNSFSGEIPYQLGSLPRLGTLKLDKNRLTGSIPSSLGNLSSLEEMDLDDNNITGEIPSEIGRLYRLRKLDLSWNSCSGEIPLNLTNCLSLEEMDLGWNNITGRIPNQLGSLSRLKTLYLGGNQLTGSIPSSLGNLTSLEEMHLSVNNITGKIPYQLGSLSRLKTLYLDHNQLTGSIPSSLGNLCSLEEMDLGDNNITGKIPNQLGSLSRLKELSLYENQLTGSIPSSLGNLSSITSLRLSSNNLNGTLPIELGHLKSLAIFYVSSNQISGTIPDSIYNLSGITEFVIAQNKLSGKLPTNLGMLPNLEYFDGGSNKLGGHIPVS…	554	1665	https://www.nature.com/articles/s41467-019-12607-6	http://cotton.hzau.edu.cn/EN/Download.htm
PlantKGA_88	Piperales	Piperaceae	Piper	nigrum	Piper nigrum	black pepper	胡椒	chromosome	Yes	基因	evmmodelPn161982	evmmodelPn1619821288xxPlantKGA_88	evm.model.Pn16.1982	L	partial	Pn3	20985256	20986920	-	Pfam	PF00560	Leucine Rich Repeat	Leucine-rich repeat	165	187	SLEEMDLGWNNITGRIPNQLGSL	0.78	MGVSCSSRLRRVTGLDFSSFNLSGTLSNYIGNLSFLRYINLRNEEYWQPWEGSNYLQGAIPSEIGCLCRLRRLDLSFNSFSGEIPYQLGSLPRLGTLKLDKNRLTGSIPSSLGNLSSLEEMDLDDNNITGEIPSEIGRLYRLRKLDLSWNSCSGEIPLNLTNCLSLEEMDLGWNNITGRIPNQLGSLSRLKTLYLGGNQLTGSIPSSLGNLTSLEEMHLSVNNITGKIPYQLGSLSRLKTLYLDHNQLTGSIPSSLGNLCSLEEMDLGDNNITGKIPNQLGSLSRLKELSLYENQLTGSIPSSLGNLSSITSLRLSSNNLNGTLPIELGHLKSLAIFYVSSNQISGTIPDSIYNLSGITEFVIAQNKLSGKLPTNLGMLPNLEYFDGGSNKLGGHIPVS…	554	1665	https://www.nature.com/articles/s41467-019-12607-6	http://cotton.hzau.edu.cn/EN/Download.htm
PlantKGA_88	Piperales	Piperaceae	Piper	nigrum	Piper nigrum	black pepper	胡椒	chromosome	Yes	基因	evmmodelPn161982	evmmodelPn1619821288xxPlantKGA_88	evm.model.Pn16.1982	L	partial	Pn3	20985256	20986920	-	Pfam	PF13855	Leucine rich repeat	Leucine-rich repeat	261	320	SLEEMDLGDNNITGKIPNQLGSLSRLKELSLYENQLTGSIPSSLGNLSSITSLRLSSNNL	4.3e-08	MGVSCSSRLRRVTGLDFSSFNLSGTLSNYIGNLSFLRYINLRNEEYWQPWEGSNYLQGAIPSEIGCLCRLRRLDLSFNSFSGEIPYQLGSLPRLGTLKLDKNRLTGSIPSSLGNLSSLEEMDLDDNNITGEIPSEIGRLYRLRKLDLSWNSCSGEIPLNLTNCLSLEEMDLGWNNITGRIPNQLGSLSRLKTLYLGGNQLTGSIPSSLGNLTSLEEMHLSVNNITGKIPYQLGSLSRLKTLYLDHNQLTGSIPSSLGNLCSLEEMDLGDNNITGKIPNQLGSLSRLKELSLYENQLTGSIPSSLGNLSSITSLRLSSNNLNGTLPIELGHLKSLAIFYVSSNQISGTIPDSIYNLSGITEFVIAQNKLSGKLPTNLGMLPNLEYFDGGSNKLGGHIPVS…	554	1665	https://www.nature.com/articles/s41467-019-12607-6	http://cotton.hzau.edu.cn/EN/Download.htm
PlantKGA_88	Piperales	Piperaceae	Piper	nigrum	Piper nigrum	black pepper	胡椒	chromosome	Yes	基因	evmmodelPn161982	evmmodelPn1619821288xxPlantKGA_88	evm.model.Pn16.1982	L	partial	Pn3	20985256	20986920	-	Pfam	PF13855	Leucine rich repeat	Leucine-rich repeat	92	150	PRLGTLKLDKNRLTGSIPSSLGNLSSLEEMDLDDNNITGEIPSEIGRLYRLRKLDLSWN	4.4e-09	MGVSCSSRLRRVTGLDFSSFNLSGTLSNYIGNLSFLRYINLRNEEYWQPWEGSNYLQGAIPSEIGCLCRLRRLDLSFNSFSGEIPYQLGSLPRLGTLKLDKNRLTGSIPSSLGNLSSLEEMDLDDNNITGEIPSEIGRLYRLRKLDLSWNSCSGEIPLNLTNCLSLEEMDLGWNNITGRIPNQLGSLSRLKTLYLGGNQLTGSIPSSLGNLTSLEEMHLSVNNITGKIPYQLGSLSRLKTLYLDHNQLTGSIPSSLGNLCSLEEMDLGDNNITGKIPNQLGSLSRLKELSLYENQLTGSIPSSLGNLSSITSLRLSSNNLNGTLPIELGHLKSLAIFYVSSNQISGTIPDSIYNLSGITEFVIAQNKLSGKLPTNLGMLPNLEYFDGGSNKLGGHIPVS…	554	1665	https://www.nature.com/articles/s41467-019-12607-6	http://cotton.hzau.edu.cn/EN/Download.htm
PlantKGA_88	Piperales	Piperaceae	Piper	nigrum	Piper nigrum	black pepper	胡椒	chromosome	Yes	基因	evmmodelPn161982	evmmodelPn1619821288xxPlantKGA_88	evm.model.Pn16.1982	L	partial	Pn3	20985256	20986920	-	Pfam	PF13855	Leucine rich repeat	Leucine-rich repeat	188	248	SRLKTLYLGGNQLTGSIPSSLGNLTSLEEMHLSVNNITGKIPYQLGSLSRLKTLYLDHNQL	6.5e-10	MGVSCSSRLRRVTGLDFSSFNLSGTLSNYIGNLSFLRYINLRNEEYWQPWEGSNYLQGAIPSEIGCLCRLRRLDLSFNSFSGEIPYQLGSLPRLGTLKLDKNRLTGSIPSSLGNLSSLEEMDLDDNNITGEIPSEIGRLYRLRKLDLSWNSCSGEIPLNLTNCLSLEEMDLGWNNITGRIPNQLGSLSRLKTLYLGGNQLTGSIPSSLGNLTSLEEMHLSVNNITGKIPYQLGSLSRLKTLYLDHNQLTGSIPSSLGNLCSLEEMDLGDNNITGKIPNQLGSLSRLKELSLYENQLTGSIPSSLGNLSSITSLRLSSNNLNGTLPIELGHLKSLAIFYVSSNQISGTIPDSIYNLSGITEFVIAQNKLSGKLPTNLGMLPNLEYFDGGSNKLGGHIPVS…	554	1665	https://www.nature.com/articles/s41467-019-12607-6	http://cotton.hzau.edu.cn/EN/Download.htm
PlantKGA_88	Piperales	Piperaceae	Piper	nigrum	Piper nigrum	black pepper	胡椒	chromosome	Yes	基因	evmmodelPn161983	evmmodelPn1619831288xxPlantKGA_88	evm.model.Pn16.1983	L	partial	Pn3	20982477	20982905	-	Pfam	PF00560	Leucine Rich Repeat	Leucine-rich repeat	30	47	KLEYLSLSHNEFRGFVPN	1.3	MQLIPNLEYFYGDSNKLGGHIPVSLANASKLEYLSLSHNEFRGFVPNFMGCNLLHLDLRSNQLGSGGTNDDMSQFIHSLANCSRNLEVQALGDNQLSGGIPDEIGKLNGLWVLHLTGNKISGKIPPALCKIAPLEGLYLGNN	142	429	https://www.nature.com/articles/s41467-019-12607-6	http://cotton.hzau.edu.cn/EN/Download.htm
PlantKGA_88	Piperales	Piperaceae	Piper	nigrum	Piper nigrum	black pepper	胡椒	chromosome	Yes	基因	evmmodelPn161983	evmmodelPn1619831288xxPlantKGA_88	evm.model.Pn16.1983	L	partial	Pn3	20982477	20982905	-	Pfam	PF13516	Leucine Rich repeat	Leucine-rich repeat	51	67	CNLLHLDLRSNQLGSGG	0.19	MQLIPNLEYFYGDSNKLGGHIPVSLANASKLEYLSLSHNEFRGFVPNFMGCNLLHLDLRSNQLGSGGTNDDMSQFIHSLANCSRNLEVQALGDNQLSGGIPDEIGKLNGLWVLHLTGNKISGKIPPALCKIAPLEGLYLGNN	142	429	https://www.nature.com/articles/s41467-019-12607-6	http://cotton.hzau.edu.cn/EN/Download.htm
PlantKGA_88	Piperales	Piperaceae	Piper	nigrum	Piper nigrum	black pepper	胡椒	chromosome	Yes	基因	evmmodelPn162175	evmmodelPn1621751288xxPlantKGA_88	evm.model.Pn16.2175	L	partial	Pn3	18287441	18289898	+	Pfam	PF13855	Leucine rich repeat	Leucine-rich repeat	215	273	SLWELDLSGNELNGTLPSTIGQLSNLEILVLSSNNLHGPVSEAHFQNMSKLARMRLSSN	2.2e-07	MHHLKYLSLSDNSIEGIQVGNTTSLEHIELASNGVILLQSDIRNLMHLKYLDVSTNKIISAIPKELGLLSSLEYLDLSGNSITGGIPREIGNLTSLKILDFSHNMIHGMIPKEIGKLANLNSLDVSYNKINGSVPREIGNLVKLEKMSLVQNELAGGLPKEIGKLINLEQLDVLENKFHGVELEWLCPLKKLWTLDLRNSKLTGPIPPCLGYMSSLWELDLSGNELNGTLPSTIGQLSNLEILVLSSNNLHGPVSEAHFQNMSKLARMRLSSNFLNFQLPQNWIPPFQLAEASLTSCHIGPAFPAWLKTQKNIQTLDMSNTSIADTIPLWFWNFTSHSIDSLNFSNNMIRGHLPNPFPSFTSYAGIDLSNNLISGLIPRFSGELGLLDISDNLVAGSIP…	794	2458	https://www.nature.com/articles/s41467-019-12607-6	http://cotton.hzau.edu.cn/EN/Download.htm
PlantKGA_88	Piperales	Piperaceae	Piper	nigrum	Piper nigrum	black pepper	胡椒	chromosome	Yes	基因	evmmodelPn162175	evmmodelPn1621751288xxPlantKGA_88	evm.model.Pn16.2175	L	partial	Pn3	18287441	18289898	+	Pfam	PF13855	Leucine rich repeat	Leucine-rich repeat	47	106	HLKYLDVSTNKIISAIPKELGLLSSLEYLDLSGNSITGGIPREIGNLTSLKILDFSHNMI	4.5e-09	MHHLKYLSLSDNSIEGIQVGNTTSLEHIELASNGVILLQSDIRNLMHLKYLDVSTNKIISAIPKELGLLSSLEYLDLSGNSITGGIPREIGNLTSLKILDFSHNMIHGMIPKEIGKLANLNSLDVSYNKINGSVPREIGNLVKLEKMSLVQNELAGGLPKEIGKLINLEQLDVLENKFHGVELEWLCPLKKLWTLDLRNSKLTGPIPPCLGYMSSLWELDLSGNELNGTLPSTIGQLSNLEILVLSSNNLHGPVSEAHFQNMSKLARMRLSSNFLNFQLPQNWIPPFQLAEASLTSCHIGPAFPAWLKTQKNIQTLDMSNTSIADTIPLWFWNFTSHSIDSLNFSNNMIRGHLPNPFPSFTSYAGIDLSNNLISGLIPRFSGELGLLDISDNLVAGSIP…	794	2458	https://www.nature.com/articles/s41467-019-12607-6	http://cotton.hzau.edu.cn/EN/Download.htm
PlantKGA_88	Piperales	Piperaceae	Piper	nigrum	Piper nigrum	black pepper	胡椒	chromosome	Yes	基因	evmmodelPn162175	evmmodelPn1621751288xxPlantKGA_88	evm.model.Pn16.2175	L	partial	Pn3	18287441	18289898	+	Pfam	PF00560	Leucine Rich Repeat	Leucine-rich repeat	481	503	SLKTLHLEKNILSGKLPSSLRNC	0.67	MHHLKYLSLSDNSIEGIQVGNTTSLEHIELASNGVILLQSDIRNLMHLKYLDVSTNKIISAIPKELGLLSSLEYLDLSGNSITGGIPREIGNLTSLKILDFSHNMIHGMIPKEIGKLANLNSLDVSYNKINGSVPREIGNLVKLEKMSLVQNELAGGLPKEIGKLINLEQLDVLENKFHGVELEWLCPLKKLWTLDLRNSKLTGPIPPCLGYMSSLWELDLSGNELNGTLPSTIGQLSNLEILVLSSNNLHGPVSEAHFQNMSKLARMRLSSNFLNFQLPQNWIPPFQLAEASLTSCHIGPAFPAWLKTQKNIQTLDMSNTSIADTIPLWFWNFTSHSIDSLNFSNNMIRGHLPNPFPSFTSYAGIDLSNNLISGLIPRFSGELGLLDISDNLVAGSIP…	794	2458	https://www.nature.com/articles/s41467-019-12607-6	http://cotton.hzau.edu.cn/EN/Download.htm
PlantKGA_88	Piperales	Piperaceae	Piper	nigrum	Piper nigrum	black pepper	胡椒	chromosome	Yes	基因	evmmodelPn162175	evmmodelPn1621751288xxPlantKGA_88	evm.model.Pn16.2175	L	partial	Pn3	18287441	18289898	+	Pfam	PF00560	Leucine Rich Repeat	Leucine-rich repeat	641	662	LLSLDLSWNKLSGEIPPSISNL	0.15	MHHLKYLSLSDNSIEGIQVGNTTSLEHIELASNGVILLQSDIRNLMHLKYLDVSTNKIISAIPKELGLLSSLEYLDLSGNSITGGIPREIGNLTSLKILDFSHNMIHGMIPKEIGKLANLNSLDVSYNKINGSVPREIGNLVKLEKMSLVQNELAGGLPKEIGKLINLEQLDVLENKFHGVELEWLCPLKKLWTLDLRNSKLTGPIPPCLGYMSSLWELDLSGNELNGTLPSTIGQLSNLEILVLSSNNLHGPVSEAHFQNMSKLARMRLSSNFLNFQLPQNWIPPFQLAEASLTSCHIGPAFPAWLKTQKNIQTLDMSNTSIADTIPLWFWNFTSHSIDSLNFSNNMIRGHLPNPFPSFTSYAGIDLSNNLISGLIPRFSGELGLLDISDNLVAGSIP…	794	2458	https://www.nature.com/articles/s41467-019-12607-6	http://cotton.hzau.edu.cn/EN/Download.htm
PlantKGA_88	Piperales	Piperaceae	Piper	nigrum	Piper nigrum	black pepper	胡椒	chromosome	Yes	基因	evmmodelPn162176	evmmodelPn1621761288xxPlantKGA_88	evm.model.Pn16.2176	L	partial	Pn3	18286320	18287171	+	Pfam	PF08263	Leucine rich repeat N-terminal domain	Leucine-rich repeat-containing N-terminal, plant-type	33	71	SSEREALIKFKRGLEDPFQHLASWDDEPNCCQWEGLTCD	9.6e-12	MTPGFAASLLLIACLYSSLTLIKGQVPVSECISSEREALIKFKRGLEDPFQHLASWDDEPNCCQWEGLTCDNNTGNVIKLDIHSPCSIDIIAYSFDLPEYGLDARDYGCWNLSGRLDPALAQLKHIHYIDLSLNTFDGLAIPTFLGSVDGASPLEPVLCRIWWVGPKAAWMDLSGVSSDWINIISAMPNLENLHAFACEIQNIDPNPRVVNFTSLRTLDLSLNNLPGASLLQWVTNLTALEVP	243	852	https://www.nature.com/articles/s41467-019-12607-6	http://cotton.hzau.edu.cn/EN/Download.htm
PlantKGA_88	Piperales	Piperaceae	Piper	nigrum	Piper nigrum	black pepper	胡椒	chromosome	Yes	基因	evmmodelPn162220	evmmodelPn1622201288xxPlantKGA_88	evm.model.Pn16.2220	L	partial	Pn3	15587547	15588434	+	Pfam	PF13855	Leucine rich repeat	Leucine-rich repeat	3	62	NLTDLTLNNNSLVGEFPSWIGNLTNLETLAFFHNNLHGQLPAGIGQLSKLEILYLYENQL	2.2e-06	MGNLTDLTLNNNSLVGEFPSWIGNLTNLETLAFFHNNLHGQLPAGIGQLSKLEILYLYENQLSGKIPLEIGNCSSLQYIDFFGNQLSESIPITIGRMNNWLSGSVPATFGFLKSLKVLMLYNNSLEGNLPNDLKNCANLTRSISPTSGLMAASCLCQSYLSFDVTDNLFEGSIPPMLGSSPFLERLRLGSNMLTGALPSELPLCKKLKHIDLNNNQLTGPFPEWLGSLPQLDEVKLSNN	239	888	https://www.nature.com/articles/s41467-019-12607-6	http://cotton.hzau.edu.cn/EN/Download.htm
PlantKGA_88	Piperales	Piperaceae	Piper	nigrum	Piper nigrum	black pepper	胡椒	chromosome	Yes	基因	evmmodelPn162220	evmmodelPn1622201288xxPlantKGA_88	evm.model.Pn16.2220	L	partial	Pn3	15587547	15588434	+	Pfam	PF13855	Leucine rich repeat	Leucine-rich repeat	183	239	LERLRLGSNMLTGALPSELPLCKKLKHIDLNNNQLTGPFPEWLGSLPQLDEVKLSNN	8e-07	MGNLTDLTLNNNSLVGEFPSWIGNLTNLETLAFFHNNLHGQLPAGIGQLSKLEILYLYENQLSGKIPLEIGNCSSLQYIDFFGNQLSESIPITIGRMNNWLSGSVPATFGFLKSLKVLMLYNNSLEGNLPNDLKNCANLTRSISPTSGLMAASCLCQSYLSFDVTDNLFEGSIPPMLGSSPFLERLRLGSNMLTGALPSELPLCKKLKHIDLNNNQLTGPFPEWLGSLPQLDEVKLSNN	239	888	https://www.nature.com/articles/s41467-019-12607-6	http://cotton.hzau.edu.cn/EN/Download.htm
PlantKGA_88	Piperales	Piperaceae	Piper	nigrum	Piper nigrum	black pepper	胡椒	chromosome	Yes	基因	evmmodelPn162220	evmmodelPn1622201288xxPlantKGA_88	evm.model.Pn16.2220	L	partial	Pn3	15587547	15588434	+	Pfam	PF00560	Leucine Rich Repeat	Leucine-rich repeat	114	136	SLKVLMLYNNSLEGNLPNDLKNC	0.96	MGNLTDLTLNNNSLVGEFPSWIGNLTNLETLAFFHNNLHGQLPAGIGQLSKLEILYLYENQLSGKIPLEIGNCSSLQYIDFFGNQLSESIPITIGRMNNWLSGSVPATFGFLKSLKVLMLYNNSLEGNLPNDLKNCANLTRSISPTSGLMAASCLCQSYLSFDVTDNLFEGSIPPMLGSSPFLERLRLGSNMLTGALPSELPLCKKLKHIDLNNNQLTGPFPEWLGSLPQLDEVKLSNN	239	888	https://www.nature.com/articles/s41467-019-12607-6	http://cotton.hzau.edu.cn/EN/Download.htm
PlantKGA_88	Piperales	Piperaceae	Piper	nigrum	Piper nigrum	black pepper	胡椒	chromosome	Yes	基因	evmmodelPn16246	evmmodelPn162461288xxPlantKGA_88	evm.model.Pn16.246	L	partial	Pn3	30884884	30887271	-	Pfam	PF13855	Leucine rich repeat	Leucine-rich repeat	349	407	HLRFLDLSSNRLTGSIPSHLSQCTQLSNINLSGNKLKGLIPDTIKNIRPLYYLALADNG	2.3e-06	MVEFAAVKPALICLLFTLLVSVLNSQNTSCNSADLAVLRDFLKGQDIDNLGWHPSSDECCQWPGVGCTNFSRSGVVGSTTILGQRVLRLDLGGRQLKGLLPNSLAGLEQLRVLNLSSNVFTGPLPQGLFRLQHLQFLDLSSNSFNGFIPSTASLPSIRVFDISGNSFSGPLPHPPAGSLNLTKFIIGKNEFDSLTDASSICNTSLKIQVLDLSSNRFTGSIPPGISHCRSLTDLYLNSNHFSGNLPDDLFGMTTLRKLLIHGNRLSGQLDRRIQNLKNLVYLDVSDNDFTGVMPDIFNSLTKLEHFSASYNSFSGMLPETLSSHTLIHLDLRENGFQGRINLNCTQLVHLRFLDLSSNRLTGSIPSHLSQCTQLSNINLSGNKLKGLIPDTIKNIRPLY…	795	2388	https://www.nature.com/articles/s41467-019-12607-6	http://cotton.hzau.edu.cn/EN/Download.htm
PlantKGA_88	Piperales	Piperaceae	Piper	nigrum	Piper nigrum	black pepper	胡椒	chromosome	Yes	基因	evmmodelPn16246	evmmodelPn162461288xxPlantKGA_88	evm.model.Pn16.246	L	partial	Pn3	30884884	30887271	-	Pfam	PF13855	Leucine rich repeat	Leucine-rich repeat	207	265	IQVLDLSSNRFTGSIPPGISHCRSLTDLYLNSNHFSGNLPDDLFGMTTLRKLLIHGNRL	6.2e-07	MVEFAAVKPALICLLFTLLVSVLNSQNTSCNSADLAVLRDFLKGQDIDNLGWHPSSDECCQWPGVGCTNFSRSGVVGSTTILGQRVLRLDLGGRQLKGLLPNSLAGLEQLRVLNLSSNVFTGPLPQGLFRLQHLQFLDLSSNSFNGFIPSTASLPSIRVFDISGNSFSGPLPHPPAGSLNLTKFIIGKNEFDSLTDASSICNTSLKIQVLDLSSNRFTGSIPPGISHCRSLTDLYLNSNHFSGNLPDDLFGMTTLRKLLIHGNRLSGQLDRRIQNLKNLVYLDVSDNDFTGVMPDIFNSLTKLEHFSASYNSFSGMLPETLSSHTLIHLDLRENGFQGRINLNCTQLVHLRFLDLSSNRLTGSIPSHLSQCTQLSNINLSGNKLKGLIPDTIKNIRPLY…	795	2388	https://www.nature.com/articles/s41467-019-12607-6	http://cotton.hzau.edu.cn/EN/Download.htm
PlantKGA_88	Piperales	Piperaceae	Piper	nigrum	Piper nigrum	black pepper	胡椒	chromosome	Yes	基因	evmmodelPn16246	evmmodelPn162461288xxPlantKGA_88	evm.model.Pn16.246	L	partial	Pn3	30884884	30887271	-	Pfam	PF13855	Leucine rich repeat	Leucine-rich repeat	571	629	LVILDLSFNHLSSDIPTSLSYLSNMEVLDLSNNNLTGTIPDSLTSLTFMSSFSVANNRL	7.5e-07	MVEFAAVKPALICLLFTLLVSVLNSQNTSCNSADLAVLRDFLKGQDIDNLGWHPSSDECCQWPGVGCTNFSRSGVVGSTTILGQRVLRLDLGGRQLKGLLPNSLAGLEQLRVLNLSSNVFTGPLPQGLFRLQHLQFLDLSSNSFNGFIPSTASLPSIRVFDISGNSFSGPLPHPPAGSLNLTKFIIGKNEFDSLTDASSICNTSLKIQVLDLSSNRFTGSIPPGISHCRSLTDLYLNSNHFSGNLPDDLFGMTTLRKLLIHGNRLSGQLDRRIQNLKNLVYLDVSDNDFTGVMPDIFNSLTKLEHFSASYNSFSGMLPETLSSHTLIHLDLRENGFQGRINLNCTQLVHLRFLDLSSNRLTGSIPSHLSQCTQLSNINLSGNKLKGLIPDTIKNIRPLY…	795	2388	https://www.nature.com/articles/s41467-019-12607-6	http://cotton.hzau.edu.cn/EN/Download.htm
PlantKGA_88	Piperales	Piperaceae	Piper	nigrum	Piper nigrum	black pepper	胡椒	chromosome	Yes	基因	evmmodelPn16246	evmmodelPn162461288xxPlantKGA_88	evm.model.Pn16.246	L	partial	Pn3	30884884	30887271	-	Pfam	PF12799	Leucine Rich repeats (2 copies)	Leucine rich repeat 4	471	510	TELKVLDLSRNELTGTIPSFIGCMKFLTYLNLSHNKFSGT	3e-06	MVEFAAVKPALICLLFTLLVSVLNSQNTSCNSADLAVLRDFLKGQDIDNLGWHPSSDECCQWPGVGCTNFSRSGVVGSTTILGQRVLRLDLGGRQLKGLLPNSLAGLEQLRVLNLSSNVFTGPLPQGLFRLQHLQFLDLSSNSFNGFIPSTASLPSIRVFDISGNSFSGPLPHPPAGSLNLTKFIIGKNEFDSLTDASSICNTSLKIQVLDLSSNRFTGSIPPGISHCRSLTDLYLNSNHFSGNLPDDLFGMTTLRKLLIHGNRLSGQLDRRIQNLKNLVYLDVSDNDFTGVMPDIFNSLTKLEHFSASYNSFSGMLPETLSSHTLIHLDLRENGFQGRINLNCTQLVHLRFLDLSSNRLTGSIPSHLSQCTQLSNINLSGNKLKGLIPDTIKNIRPLY…	795	2388	https://www.nature.com/articles/s41467-019-12607-6	http://cotton.hzau.edu.cn/EN/Download.htm
PlantKGA_88	Piperales	Piperaceae	Piper	nigrum	Piper nigrum	black pepper	胡椒	chromosome	Yes	基因	evmmodelPn16254	evmmodelPn162541288xxPlantKGA_88	evm.model.Pn16.254	L	partial	Pn3	30832678	30833368	+	Pfam	PF00560	Leucine Rich Repeat	Leucine-rich repeat	17	38	LKYLDLSNNSLSDEIPKSLTNL	0.0071	MSSGKIPGWLGNFRRYLKYLDLSNNSLSDEIPKSLTNLRMECQPLNNMNTNFASEFPRFPPALNLSYNKFKGQILPEIWHLHELAILDLSWNQLSGSISWWAFVPHAQFAWPIPSEGLLGAYPNSIFEGNMGLCGEHNFLVSCENRSSTEIDSNWVFSSDHEEGLLTEDVNLAVMFGAFSGFLATIGMFALKGKLF	196	691	https://www.nature.com/articles/s41467-019-12607-6	http://cotton.hzau.edu.cn/EN/Download.htm
PlantKGA_88	Piperales	Piperaceae	Piper	nigrum	Piper nigrum	black pepper	胡椒	chromosome	Yes	基因	evmmodelPn16256	evmmodelPn162561288xxPlantKGA_88	evm.model.Pn16.256	L	partial	Pn3	30822027	30824156	-	Pfam	PF13855	Leucine rich repeat	Leucine-rich repeat	442	501	GLQALILGNCQISGHIPPWLKMCTNLQLLDLSWNRLEGTIPNWFGDLGNLFYLDISNNYL	1.9e-08	MAPMATTIFLLSLLSMASSLPSPSQNSTCHPNDLASLQGFFMGLSSGVPGWPADKYSTDCCQWHGVHCEEVGGRRRVVRLELGHYFLQGTVSDQSLSGLDQLRVLDLSHNLLAGELPSKLLHLNHLQVLDLSFNRLKGAVPSNNSLPSLQVFNISSNLFFGMFPALANSPLLTSFAIEDNNFGGSVDRQLCLRSPKITDLHLSNNKFSGVLHPGTISNCTNLIHLDLGFNFFAGNLPDELFAIPSLERLSLQDNMFSGVLSENFGNLSNLLVVDMSLNGFFGEIPDVFNGLERLEKFSATSNRFSGHLPTSISNLSSLELLNLRNNSLEDEISLNCSTMSSMNSLDLGSNQFTGRNLHELSRCRKLRTLNLSRNRINGLLPDSFKELQHLSSLALSASG…	709	2130	https://www.nature.com/articles/s41467-019-12607-6	http://cotton.hzau.edu.cn/EN/Download.htm
PlantKGA_88	Piperales	Piperaceae	Piper	nigrum	Piper nigrum	black pepper	胡椒	chromosome	Yes	基因	evmmodelPn16256	evmmodelPn162561288xxPlantKGA_88	evm.model.Pn16.256	L	partial	Pn3	30822027	30824156	-	Pfam	PF13855	Leucine rich repeat	Leucine-rich repeat	195	255	PKITDLHLSNNKFSGVLHPGTISNCTNLIHLDLGFNFFAGNLPDELFAIPSLERLSLQDNM	1.4e-06	MAPMATTIFLLSLLSMASSLPSPSQNSTCHPNDLASLQGFFMGLSSGVPGWPADKYSTDCCQWHGVHCEEVGGRRRVVRLELGHYFLQGTVSDQSLSGLDQLRVLDLSHNLLAGELPSKLLHLNHLQVLDLSFNRLKGAVPSNNSLPSLQVFNISSNLFFGMFPALANSPLLTSFAIEDNNFGGSVDRQLCLRSPKITDLHLSNNKFSGVLHPGTISNCTNLIHLDLGFNFFAGNLPDELFAIPSLERLSLQDNMFSGVLSENFGNLSNLLVVDMSLNGFFGEIPDVFNGLERLEKFSATSNRFSGHLPTSISNLSSLELLNLRNNSLEDEISLNCSTMSSMNSLDLGSNQFTGRNLHELSRCRKLRTLNLSRNRINGLLPDSFKELQHLSSLALSASG…	709	2130	https://www.nature.com/articles/s41467-019-12607-6	http://cotton.hzau.edu.cn/EN/Download.htm
PlantKGA_88	Piperales	Piperaceae	Piper	nigrum	Piper nigrum	black pepper	胡椒	chromosome	Yes	基因	evmmodelPn16256	evmmodelPn162561288xxPlantKGA_88	evm.model.Pn16.256	L	partial	Pn3	30822027	30824156	-	Pfam	PF13855	Leucine rich repeat	Leucine-rich repeat	90	136	TVSDQSLSGLDQLRVLDLSHNLLAGELPSKLLHLNHLQVLDLSFNRL	1e-06	MAPMATTIFLLSLLSMASSLPSPSQNSTCHPNDLASLQGFFMGLSSGVPGWPADKYSTDCCQWHGVHCEEVGGRRRVVRLELGHYFLQGTVSDQSLSGLDQLRVLDLSHNLLAGELPSKLLHLNHLQVLDLSFNRLKGAVPSNNSLPSLQVFNISSNLFFGMFPALANSPLLTSFAIEDNNFGGSVDRQLCLRSPKITDLHLSNNKFSGVLHPGTISNCTNLIHLDLGFNFFAGNLPDELFAIPSLERLSLQDNMFSGVLSENFGNLSNLLVVDMSLNGFFGEIPDVFNGLERLEKFSATSNRFSGHLPTSISNLSSLELLNLRNNSLEDEISLNCSTMSSMNSLDLGSNQFTGRNLHELSRCRKLRTLNLSRNRINGLLPDSFKELQHLSSLALSASG…	709	2130	https://www.nature.com/articles/s41467-019-12607-6	http://cotton.hzau.edu.cn/EN/Download.htm
PlantKGA_88	Piperales	Piperaceae	Piper	nigrum	Piper nigrum	black pepper	胡椒	chromosome	Yes	基因	evmmodelPn16256	evmmodelPn162561288xxPlantKGA_88	evm.model.Pn16.256	L	partial	Pn3	30822027	30824156	-	Pfam	PF13855	Leucine rich repeat	Leucine-rich repeat	364	426	RKLRTLNLSRNRINGLLPDSFKELQHLSSLALSASGLSNLSDALMVLVQCKNLTTLVLSGNNF	4.1e-07	MAPMATTIFLLSLLSMASSLPSPSQNSTCHPNDLASLQGFFMGLSSGVPGWPADKYSTDCCQWHGVHCEEVGGRRRVVRLELGHYFLQGTVSDQSLSGLDQLRVLDLSHNLLAGELPSKLLHLNHLQVLDLSFNRLKGAVPSNNSLPSLQVFNISSNLFFGMFPALANSPLLTSFAIEDNNFGGSVDRQLCLRSPKITDLHLSNNKFSGVLHPGTISNCTNLIHLDLGFNFFAGNLPDELFAIPSLERLSLQDNMFSGVLSENFGNLSNLLVVDMSLNGFFGEIPDVFNGLERLEKFSATSNRFSGHLPTSISNLSSLELLNLRNNSLEDEISLNCSTMSSMNSLDLGSNQFTGRNLHELSRCRKLRTLNLSRNRINGLLPDSFKELQHLSSLALSASG…	709	2130	https://www.nature.com/articles/s41467-019-12607-6	http://cotton.hzau.edu.cn/EN/Download.htm
PlantKGA_88	Piperales	Piperaceae	Piper	nigrum	Piper nigrum	black pepper	胡椒	chromosome	Yes	基因	evmmodelPn16256	evmmodelPn162561288xxPlantKGA_88	evm.model.Pn16.256	L	partial	Pn3	30822027	30824156	-	Pfam	PF13855	Leucine rich repeat	Leucine-rich repeat	553	609	TLDLSSNNLLGPIWPEFGNLKNLHVLNLSRNDLSGSIPHELSGMTSIEALDLSYNGL	3e-09	MAPMATTIFLLSLLSMASSLPSPSQNSTCHPNDLASLQGFFMGLSSGVPGWPADKYSTDCCQWHGVHCEEVGGRRRVVRLELGHYFLQGTVSDQSLSGLDQLRVLDLSHNLLAGELPSKLLHLNHLQVLDLSFNRLKGAVPSNNSLPSLQVFNISSNLFFGMFPALANSPLLTSFAIEDNNFGGSVDRQLCLRSPKITDLHLSNNKFSGVLHPGTISNCTNLIHLDLGFNFFAGNLPDELFAIPSLERLSLQDNMFSGVLSENFGNLSNLLVVDMSLNGFFGEIPDVFNGLERLEKFSATSNRFSGHLPTSISNLSSLELLNLRNNSLEDEISLNCSTMSSMNSLDLGSNQFTGRNLHELSRCRKLRTLNLSRNRINGLLPDSFKELQHLSSLALSASG…	709	2130	https://www.nature.com/articles/s41467-019-12607-6	http://cotton.hzau.edu.cn/EN/Download.htm
PlantKGA_88	Piperales	Piperaceae	Piper	nigrum	Piper nigrum	black pepper	胡椒	chromosome	Yes	基因	evmmodelPn16258	evmmodelPn162581288xxPlantKGA_88	evm.model.Pn16.258	L	partial	Pn3	30801017	30803146	-	Pfam	PF00560	Leucine Rich Repeat	Leucine-rich repeat	101	122	QLRVLDLSHNILAGELPSKLLH	1.1	MAPMATTIFLLSLLSIASSLPSPSQNSTCHPNDLASLQGFFMGLSSGVPGWPADKYSTDCCQWHGVHCEEVGGRRRVVRLELGHDSLQGTVSDQSLSGLDQLRVLDLSHNILAGELPSKLLHLNHLQVLDLSFNRLKGAVPSNNSLPSLQVFNISSNLFFGTFPALANSPLLTSFAIEDNNFGGSVDRQLCLRSPKITDLHLSNNQFSGVLHPGTISNCTNLIHLDLGFNFFAGNLPDELFAIPSLERLSLQDNMFSGVLSENFGNLSNLLVVDMSLNGFFGEIPDVFNGLERLEKFSATSNRFSGHLPTSISNLSSLELLNLRNNSLEDEISLNCSTMSSMNSLDLGSNQFTGRNLHELSRCRKLRTLNLSRNRINGLLPDSFKELQHLSSLALSASG…	709	2130	https://www.nature.com/articles/s41467-019-12607-6	http://cotton.hzau.edu.cn/EN/Download.htm
PlantKGA_88	Piperales	Piperaceae	Piper	nigrum	Piper nigrum	black pepper	胡椒	chromosome	Yes	基因	evmmodelPn16258	evmmodelPn162581288xxPlantKGA_88	evm.model.Pn16.258	L	partial	Pn3	30801017	30803146	-	Pfam	PF13855	Leucine rich repeat	Leucine-rich repeat	364	426	RKLRTLNLSRNRINGLLPDSFKELQHLSSLALSASGLSNLSDALMVLVQCKNLTTLVLSGNNF	4.6e-07	MAPMATTIFLLSLLSIASSLPSPSQNSTCHPNDLASLQGFFMGLSSGVPGWPADKYSTDCCQWHGVHCEEVGGRRRVVRLELGHDSLQGTVSDQSLSGLDQLRVLDLSHNILAGELPSKLLHLNHLQVLDLSFNRLKGAVPSNNSLPSLQVFNISSNLFFGTFPALANSPLLTSFAIEDNNFGGSVDRQLCLRSPKITDLHLSNNQFSGVLHPGTISNCTNLIHLDLGFNFFAGNLPDELFAIPSLERLSLQDNMFSGVLSENFGNLSNLLVVDMSLNGFFGEIPDVFNGLERLEKFSATSNRFSGHLPTSISNLSSLELLNLRNNSLEDEISLNCSTMSSMNSLDLGSNQFTGRNLHELSRCRKLRTLNLSRNRINGLLPDSFKELQHLSSLALSASG…	709	2130	https://www.nature.com/articles/s41467-019-12607-6	http://cotton.hzau.edu.cn/EN/Download.htm
PlantKGA_88	Piperales	Piperaceae	Piper	nigrum	Piper nigrum	black pepper	胡椒	chromosome	Yes	基因	evmmodelPn16258	evmmodelPn162581288xxPlantKGA_88	evm.model.Pn16.258	L	partial	Pn3	30801017	30803146	-	Pfam	PF13855	Leucine rich repeat	Leucine-rich repeat	442	501	GLQALILGNCQISGHIPPWLKMCTNLQLLDLSWNRLEGTIPNWFGDLGNLFYLDISNNYL	1.9e-08	MAPMATTIFLLSLLSIASSLPSPSQNSTCHPNDLASLQGFFMGLSSGVPGWPADKYSTDCCQWHGVHCEEVGGRRRVVRLELGHDSLQGTVSDQSLSGLDQLRVLDLSHNILAGELPSKLLHLNHLQVLDLSFNRLKGAVPSNNSLPSLQVFNISSNLFFGTFPALANSPLLTSFAIEDNNFGGSVDRQLCLRSPKITDLHLSNNQFSGVLHPGTISNCTNLIHLDLGFNFFAGNLPDELFAIPSLERLSLQDNMFSGVLSENFGNLSNLLVVDMSLNGFFGEIPDVFNGLERLEKFSATSNRFSGHLPTSISNLSSLELLNLRNNSLEDEISLNCSTMSSMNSLDLGSNQFTGRNLHELSRCRKLRTLNLSRNRINGLLPDSFKELQHLSSLALSASG…	709	2130	https://www.nature.com/articles/s41467-019-12607-6	http://cotton.hzau.edu.cn/EN/Download.htm
PlantKGA_88	Piperales	Piperaceae	Piper	nigrum	Piper nigrum	black pepper	胡椒	chromosome	Yes	基因	evmmodelPn16258	evmmodelPn162581288xxPlantKGA_88	evm.model.Pn16.258	L	partial	Pn3	30801017	30803146	-	Pfam	PF13855	Leucine rich repeat	Leucine-rich repeat	553	609	TLDLSSNNLLGPIWPEFGNLKNLHVLNLSRNDLSGSIPHELSGMTYIEALDLSYNGL	3.1e-08	MAPMATTIFLLSLLSIASSLPSPSQNSTCHPNDLASLQGFFMGLSSGVPGWPADKYSTDCCQWHGVHCEEVGGRRRVVRLELGHDSLQGTVSDQSLSGLDQLRVLDLSHNILAGELPSKLLHLNHLQVLDLSFNRLKGAVPSNNSLPSLQVFNISSNLFFGTFPALANSPLLTSFAIEDNNFGGSVDRQLCLRSPKITDLHLSNNQFSGVLHPGTISNCTNLIHLDLGFNFFAGNLPDELFAIPSLERLSLQDNMFSGVLSENFGNLSNLLVVDMSLNGFFGEIPDVFNGLERLEKFSATSNRFSGHLPTSISNLSSLELLNLRNNSLEDEISLNCSTMSSMNSLDLGSNQFTGRNLHELSRCRKLRTLNLSRNRINGLLPDSFKELQHLSSLALSASG…	709	2130	https://www.nature.com/articles/s41467-019-12607-6	http://cotton.hzau.edu.cn/EN/Download.htm
PlantKGA_88	Piperales	Piperaceae	Piper	nigrum	Piper nigrum	black pepper	胡椒	chromosome	Yes	基因	evmmodelPn16258	evmmodelPn162581288xxPlantKGA_88	evm.model.Pn16.258	L	partial	Pn3	30801017	30803146	-	Pfam	PF13855	Leucine rich repeat	Leucine-rich repeat	195	255	PKITDLHLSNNQFSGVLHPGTISNCTNLIHLDLGFNFFAGNLPDELFAIPSLERLSLQDNM	2.1e-06	MAPMATTIFLLSLLSIASSLPSPSQNSTCHPNDLASLQGFFMGLSSGVPGWPADKYSTDCCQWHGVHCEEVGGRRRVVRLELGHDSLQGTVSDQSLSGLDQLRVLDLSHNILAGELPSKLLHLNHLQVLDLSFNRLKGAVPSNNSLPSLQVFNISSNLFFGTFPALANSPLLTSFAIEDNNFGGSVDRQLCLRSPKITDLHLSNNQFSGVLHPGTISNCTNLIHLDLGFNFFAGNLPDELFAIPSLERLSLQDNMFSGVLSENFGNLSNLLVVDMSLNGFFGEIPDVFNGLERLEKFSATSNRFSGHLPTSISNLSSLELLNLRNNSLEDEISLNCSTMSSMNSLDLGSNQFTGRNLHELSRCRKLRTLNLSRNRINGLLPDSFKELQHLSSLALSASG…	709	2130	https://www.nature.com/articles/s41467-019-12607-6	http://cotton.hzau.edu.cn/EN/Download.htm
PlantKGA_88	Piperales	Piperaceae	Piper	nigrum	Piper nigrum	black pepper	胡椒	chromosome	Yes	基因	evmmodelPn16263	evmmodelPn162631288xxPlantKGA_88	evm.model.Pn16.263	L	partial	Pn3	30775183	30777736	-	Pfam	PF00560	Leucine Rich Repeat	Leucine-rich repeat	408	429	LRTLNLARNKLDGLLPDSFKEL	0.064	MVRWYKVAHASEFLVITGYGVKGIKLAKKARILPGQSCTVFEVSPIMCQLEQWYLLHILVSIFLQSHVLHSQNLTCHSKDLEALRAFFHGLRSGVPSWPGGNSTDCCRWHGVNCEGSDGRVVSLELGGNSLRGPISESLSGLDQLRVLNLSLNFLDGNLPSKLLHMEKLEMLDLSVNILKGAVPSNNSLPSLQLFNISVNLFTGLFPILANSPRLISFTIQGNRFVGPVDKEICRLSPEITGLHLSGNYFSGILHAGIANCTNLRHLELGSNALVGNLPDELFGIVSLEHLSLQDNMLSGLLSEKIGNLSNLLIVDLSFNRFYGRIPDVFGKLERLKHFSAISNGFVGPLPASLSNVSTLQLINLRNNSLDGEINLDCATMISLNFLDLGFNQFTGRNL…	751	2554	https://www.nature.com/articles/s41467-019-12607-6	http://cotton.hzau.edu.cn/EN/Download.htm
PlantKGA_88	Piperales	Piperaceae	Piper	nigrum	Piper nigrum	black pepper	胡椒	chromosome	Yes	基因	evmmodelPn16263	evmmodelPn162631288xxPlantKGA_88	evm.model.Pn16.263	L	partial	Pn3	30775183	30777736	-	Pfam	PF08263	Leucine rich repeat N-terminal domain	Leucine-rich repeat-containing N-terminal, plant-type	78	114	SKDLEALRAFFHGLRSGVPSWPGGNSTDCCRWHGVNC	2.8e-06	MVRWYKVAHASEFLVITGYGVKGIKLAKKARILPGQSCTVFEVSPIMCQLEQWYLLHILVSIFLQSHVLHSQNLTCHSKDLEALRAFFHGLRSGVPSWPGGNSTDCCRWHGVNCEGSDGRVVSLELGGNSLRGPISESLSGLDQLRVLNLSLNFLDGNLPSKLLHMEKLEMLDLSVNILKGAVPSNNSLPSLQLFNISVNLFTGLFPILANSPRLISFTIQGNRFVGPVDKEICRLSPEITGLHLSGNYFSGILHAGIANCTNLRHLELGSNALVGNLPDELFGIVSLEHLSLQDNMLSGLLSEKIGNLSNLLIVDLSFNRFYGRIPDVFGKLERLKHFSAISNGFVGPLPASLSNVSTLQLINLRNNSLDGEINLDCATMISLNFLDLGFNQFTGRNL…	751	2554	https://www.nature.com/articles/s41467-019-12607-6	http://cotton.hzau.edu.cn/EN/Download.htm
PlantKGA_88	Piperales	Piperaceae	Piper	nigrum	Piper nigrum	black pepper	胡椒	chromosome	Yes	基因	evmmodelPn16263	evmmodelPn162631288xxPlantKGA_88	evm.model.Pn16.263	L	partial	Pn3	30775183	30777736	-	Pfam	PF13855	Leucine rich repeat	Leucine-rich repeat	239	298	EITGLHLSGNYFSGILHAGIANCTNLRHLELGSNALVGNLPDELFGIVSLEHLSLQDNML	4.4e-07	MVRWYKVAHASEFLVITGYGVKGIKLAKKARILPGQSCTVFEVSPIMCQLEQWYLLHILVSIFLQSHVLHSQNLTCHSKDLEALRAFFHGLRSGVPSWPGGNSTDCCRWHGVNCEGSDGRVVSLELGGNSLRGPISESLSGLDQLRVLNLSLNFLDGNLPSKLLHMEKLEMLDLSVNILKGAVPSNNSLPSLQLFNISVNLFTGLFPILANSPRLISFTIQGNRFVGPVDKEICRLSPEITGLHLSGNYFSGILHAGIANCTNLRHLELGSNALVGNLPDELFGIVSLEHLSLQDNMLSGLLSEKIGNLSNLLIVDLSFNRFYGRIPDVFGKLERLKHFSAISNGFVGPLPASLSNVSTLQLINLRNNSLDGEINLDCATMISLNFLDLGFNQFTGRNL…	751	2554	https://www.nature.com/articles/s41467-019-12607-6	http://cotton.hzau.edu.cn/EN/Download.htm
PlantKGA_88	Piperales	Piperaceae	Piper	nigrum	Piper nigrum	black pepper	胡椒	chromosome	Yes	基因	evmmodelPn16263	evmmodelPn162631288xxPlantKGA_88	evm.model.Pn16.263	L	partial	Pn3	30775183	30777736	-	Pfam	PF13855	Leucine rich repeat	Leucine-rich repeat	595	651	TLDLSSNNLIGPIWPEFGNLKELHVLNLGRNDLSGSIPHELSGMTSIEALDLSYNGL	3.4e-08	MVRWYKVAHASEFLVITGYGVKGIKLAKKARILPGQSCTVFEVSPIMCQLEQWYLLHILVSIFLQSHVLHSQNLTCHSKDLEALRAFFHGLRSGVPSWPGGNSTDCCRWHGVNCEGSDGRVVSLELGGNSLRGPISESLSGLDQLRVLNLSLNFLDGNLPSKLLHMEKLEMLDLSVNILKGAVPSNNSLPSLQLFNISVNLFTGLFPILANSPRLISFTIQGNRFVGPVDKEICRLSPEITGLHLSGNYFSGILHAGIANCTNLRHLELGSNALVGNLPDELFGIVSLEHLSLQDNMLSGLLSEKIGNLSNLLIVDLSFNRFYGRIPDVFGKLERLKHFSAISNGFVGPLPASLSNVSTLQLINLRNNSLDGEINLDCATMISLNFLDLGFNQFTGRNL…	751	2554	https://www.nature.com/articles/s41467-019-12607-6	http://cotton.hzau.edu.cn/EN/Download.htm
PlantKGA_88	Piperales	Piperaceae	Piper	nigrum	Piper nigrum	black pepper	胡椒	chromosome	Yes	基因	evmmodelPn16263	evmmodelPn162631288xxPlantKGA_88	evm.model.Pn16.263	L	partial	Pn3	30775183	30777736	-	Pfam	PF13855	Leucine rich repeat	Leucine-rich repeat	484	543	RLQALILASCQISGHIPPWLKMCTNLQLLDLSWNRLEGTIPNWFGDLDNLFYLDISNNSL	1.2e-08	MVRWYKVAHASEFLVITGYGVKGIKLAKKARILPGQSCTVFEVSPIMCQLEQWYLLHILVSIFLQSHVLHSQNLTCHSKDLEALRAFFHGLRSGVPSWPGGNSTDCCRWHGVNCEGSDGRVVSLELGGNSLRGPISESLSGLDQLRVLNLSLNFLDGNLPSKLLHMEKLEMLDLSVNILKGAVPSNNSLPSLQLFNISVNLFTGLFPILANSPRLISFTIQGNRFVGPVDKEICRLSPEITGLHLSGNYFSGILHAGIANCTNLRHLELGSNALVGNLPDELFGIVSLEHLSLQDNMLSGLLSEKIGNLSNLLIVDLSFNRFYGRIPDVFGKLERLKHFSAISNGFVGPLPASLSNVSTLQLINLRNNSLDGEINLDCATMISLNFLDLGFNQFTGRNL…	751	2554	https://www.nature.com/articles/s41467-019-12607-6	http://cotton.hzau.edu.cn/EN/Download.htm
PlantKGA_88	Piperales	Piperaceae	Piper	nigrum	Piper nigrum	black pepper	胡椒	chromosome	Yes	基因	evmmodelPn16439	evmmodelPn164391288xxPlantKGA_88	evm.model.Pn16.439	L	partial	Pn3	38993065	38994427	+	Pfam	PF08263	Leucine rich repeat N-terminal domain	Leucine-rich repeat-containing N-terminal, plant-type	5	44	ESDLLALLSFKDQITIDPFQVLSSWNNSLHFCEWQGVTCS	7.5e-13	MLKNESDLLALLSFKDQITIDPFQVLSSWNNSLHFCEWQGVTCSNRQVLDLETNFLHGDIALNLTKMLLIEGAFNRLQQALWYYSTRVGHFGSIPPSPGNLSFLSVLALSENIGIEGPIPQELGKLSNLQKIYLGSTNISENASHLKRIALTRNYLSGVIPGDLGRLENLVELSFGQNRLGRGKHPDDLLFIESLSNCSNLTAMSIAYNQVGGLLPRSLGILSSKLGELYLGGNHIYSTIPTEILSNLLGLKRLGLNDLKLNGDIPVEIGKLKELTVVNLNGNSLAGEINSYIGNLTYLEIFIGVGNYLNAELPQHLQVLIPKRP	325	1363	https://www.nature.com/articles/s41467-019-12607-6	http://cotton.hzau.edu.cn/EN/Download.htm
PlantKGA_88	Piperales	Piperaceae	Piper	nigrum	Piper nigrum	black pepper	胡椒	chromosome	Yes	基因	evmmodelPn16515	evmmodelPn165151288xxPlantKGA_88	evm.model.Pn16.515	L	partial	Pn3	38347502	38348858	-	Pfam	PF08263	Leucine rich repeat N-terminal domain	Leucine-rich repeat-containing N-terminal, plant-type	5	44	ESDLLALLSFKDQITIDPFQVLSSWNNSLHFCEWQGVTCS	6.9e-13	MLKNESDLLALLSFKDQITIDPFQVLSSWNNSLHFCEWQGVTCSNRQVLDLETNFLHGDIALNLTKMLLIEGAFNRLQQALWYYSTRVGHFGSIPPSPGNLSLLSVLALSENIGIEGPIPQELENASHLKRIALTRNYLSGVIPGDLGRLENLVELSFGQNRLGRGKHPDDLLFIESLSSNLTAMSIAFNQVGGLLPRSLGILSSKLGELYLGGNHIYSTIPTEILSNLLGLKRLGLNDLKLSGDIPVEIGKLKELTVVNLNGNSLAGEITSYIGNLTYLEIFIGVGNHLNAELPQHLQVLIPKRP	306	1357	https://www.nature.com/articles/s41467-019-12607-6	http://cotton.hzau.edu.cn/EN/Download.htm
PlantKGA_88	Piperales	Piperaceae	Piper	nigrum	Piper nigrum	black pepper	胡椒	chromosome	Yes	基因	evmmodelPn16612	evmmodelPn166121288xxPlantKGA_88	evm.model.Pn16.612	L	partial	Pn3	37448105	37448689	-	Pfam	PF13855	Leucine rich repeat	Leucine-rich repeat	92	150	LEVLDLETNFLQGEIPLNLTKCPQLKELSIDYNKLSGTVPPELGTLSRLEMLSLSGNEL	3.4e-07	MLKNESDLLALLSFEDQITIDPLQVLSSWNNSLHFCQWQGVTCSNRHERVTMLNFGGFKLEGTLSSHLGNLSFLKVFNLSNNIFKDDNPFCLEVLDLETNFLQGEIPLNLTKCPQLKELSIDYNKLSGTVPPELGTLSRLEMLSLSGNELIGSIPPSLGNLSFRSSLEALKDLYHKNLVSFPVCKRFTWDPPIS	194	585	https://www.nature.com/articles/s41467-019-12607-6	http://cotton.hzau.edu.cn/EN/Download.htm
PlantKGA_88	Piperales	Piperaceae	Piper	nigrum	Piper nigrum	black pepper	胡椒	chromosome	Yes	基因	evmmodelPn16612	evmmodelPn166121288xxPlantKGA_88	evm.model.Pn16.612	L	partial	Pn3	37448105	37448689	-	Pfam	PF08263	Leucine rich repeat N-terminal domain	Leucine-rich repeat-containing N-terminal, plant-type	5	44	ESDLLALLSFEDQITIDPLQVLSSWNNSLHFCQWQGVTCS	4.8e-12	MLKNESDLLALLSFEDQITIDPLQVLSSWNNSLHFCQWQGVTCSNRHERVTMLNFGGFKLEGTLSSHLGNLSFLKVFNLSNNIFKDDNPFCLEVLDLETNFLQGEIPLNLTKCPQLKELSIDYNKLSGTVPPELGTLSRLEMLSLSGNELIGSIPPSLGNLSFRSSLEALKDLYHKNLVSFPVCKRFTWDPPIS	194	585	https://www.nature.com/articles/s41467-019-12607-6	http://cotton.hzau.edu.cn/EN/Download.htm
PlantKGA_88	Piperales	Piperaceae	Piper	nigrum	Piper nigrum	black pepper	胡椒	chromosome	Yes	基因	evmmodelPn16635	evmmodelPn166351288xxPlantKGA_88	evm.model.Pn16.635	L	partial	Pn3	37173271	37175499	-	Pfam	PF13855	Leucine rich repeat	Leucine-rich repeat	62	119	HLRYLELSHNMLTQLPAVSIATLKELQYLDLSESCIKTLPENIGTLSSLRQLNVSWCT	3e-10	MSIGHINLARVEKLRTLIFRRYGSTPEPFDTVLKSLKSFRVLKLRNCSVGHHSWEHLGKLVHLRYLELSHNMLTQLPAVSIATLKELQYLDLSESCIKTLPENIGTLSSLRQLNVSWCTLLVNLPKTIVSLPHLQVINLEGCSGLEELPELNDPSSLRQLNVSYCDSLVNLPKTIVSLPHLQVLNLSNCSRLEELPELKGLSSLRQLNVEECDSLVNLPKTIVSLPHLQVIRLRNCSSLEELPELKDLSSLRQLDISGCTSLVNLPKRIISLPHLQVISLEGCSVLEELPELKDLSSLRQLNVSGCSSLVNLPKTIVSLPHLQVINLRNCFRLKELPEGILEITSLRRLNVEGCGGLKKLPNGIGRRNDVVVILDRFLVEEAGGDEGRGCSRSNIGELG…	742	2229	https://www.nature.com/articles/s41467-019-12607-6	http://cotton.hzau.edu.cn/EN/Download.htm
PlantKGA_88	Piperales	Piperaceae	Piper	nigrum	Piper nigrum	black pepper	胡椒	chromosome	Yes	基因	evmmodelPn16840	evmmodelPn168401288xxPlantKGA_88	evm.model.Pn16.840	L	partial	Pn3	35268352	35269701	+	Pfam	PF13855	Leucine rich repeat	Leucine-rich repeat	13	67	ELRHLDLSDTNIEILPKNIVSLPHLQVINLRGSSLEELPEGIFEMTSLRQLNVER	7.3e-07	MQLPVVSIAKLKELRHLDLSDTNIEILPKNIVSLPHLQVINLRGSSLEELPEGIFEMTSLRQLNVERCWGLKKLPNGIGSSKDVVVRLNKFPVGEASGDEGGGCNIGELGGTNIRAEYLLIIFNLEEVGSIDEARTANLIEKTSLRNLVLEWNDTGSGARNVAADGVLEGLRPPPSLKWLDIKKFPGQTFPSWMGDGGAAFRRLQRVALVFCRNCTQLPALGQLPSLEWLIIVGLDGVESLGREFFGGPSPTFPYLKILTFRDMRNWSEWVALSPISSEGEEGSAESPIMPALETLKFTECPKLEAMPPIFTTSLRKLAIDDSSPMRYHSSFLQFLPLYETIAIVGDEGNAKPTEDAHNPLICVVIGQKATELPAGLLLHHTALRMLILADLPLLRSLP…	449	1350	https://www.nature.com/articles/s41467-019-12607-6	http://cotton.hzau.edu.cn/EN/Download.htm
PlantKGA_88	Piperales	Piperaceae	Piper	nigrum	Piper nigrum	black pepper	胡椒	chromosome	Yes	基因	evmmodelPn171177	evmmodelPn1711771288xxPlantKGA_88	evm.model.Pn17.1177	L	partial	Pn21	14196365	14197626	+	Pfam	PF13855	Leucine rich repeat	Leucine-rich repeat	133	191	KLSTLLLCVSRLESLEDGCFQFMQNLKVLDLPYTNIRMLPSAIETLKQLCYLNVAGTRL	5.8e-10	MQSCFLYCSLFPEDHNILKKELIAYCMGEGFFDECTSVDDAWEKGCEIIETPKLASIIESIKENLVEYISMHDVIRDIALWIVSLNKEKGVFLVCPDQSEVPKVEKWEEAQRINLQGNSSLRKFKTSTTNYHKLSTLLLCVSRLESLEDGCFQFMQNLKVLDLPYTNIRMLPSAIETLKQLCYLNVAGTRLQKLPQELAEQDMLKHLVLHSQEWGGNVQIGDVIKRLSQLKILEMLCPALEDIKLEIKDLERLTSLQDFSITIRTCHTLSALAGLAKLSNCTSRPKTLHLVGCESMEEILLGGAGNGDIAMGHQSIILPGLERLNIDFNHKLDLVSVELLSPLRLPYLRLLAINNCIPLSTLACAGLAHTLEELHIYHCHKMNQLLSKRVERRRQHC	397	1262	https://www.nature.com/articles/s41467-019-12607-6	http://cotton.hzau.edu.cn/EN/Download.htm
PlantKGA_88	Piperales	Piperaceae	Piper	nigrum	Piper nigrum	black pepper	胡椒	chromosome	Yes	基因	evmmodelPn171425	evmmodelPn1714251288xxPlantKGA_88	evm.model.Pn17.1425	L	partial	Pn21	4930377	4933047	-	Pfam	PF13855	Leucine rich repeat	Leucine-rich repeat	323	369	EIHPSLISNWSQLTALQLSSNLLTGHIPTQVGSLHNLTYLDLSRNLL	2.7e-06	MKFLRVAFFIFLCSQLLLKISAQDEEEALLYWKSSLLASDSLISWSHGHNQSPCQWRGVGCDSSGSITELNLNSVAVSGTLGKLNFSAIPNLTVLNLSSNQLSGLIPPQIGVLSKLTHLDFTHNNFSGSIPKEIGRMRNLQFIHFYDNSLTGAIPHQLSNLQSLSYLDLSGNYLESPDDPFHFIGFPHLNSLLLGLNSIGPDFPLFVLNCTNLVHLDLSMNLITDPIPLELGKLGKLQQLHLGDNTNMTGQISSFIGNLTKLKNLDMRNIHLNSPIPDELSFCTKLTVLALLNTNLSGPLPPSLKSLTQISDLDLSGNQISGEIHPSLISNWSQLTALQLSSNLLTGHIPTQVGSLHNLTYLDLSRNLLHGTLPSELGNLRNIKSLYLSENHLTGPLPS…	859	2671	https://www.nature.com/articles/s41467-019-12607-6	http://cotton.hzau.edu.cn/EN/Download.htm
PlantKGA_88	Piperales	Piperaceae	Piper	nigrum	Piper nigrum	black pepper	胡椒	chromosome	Yes	基因	evmmodelPn171425	evmmodelPn1714251288xxPlantKGA_88	evm.model.Pn17.1425	L	partial	Pn21	4930377	4933047	-	Pfam	PF13855	Leucine rich repeat	Leucine-rich repeat	567	627	NLEELNLSSNRLTGNIPDQFFNPSTKLYRVDLSDNRLSGSIPKEIGNSPKLSFLYLGSNKL	3.5e-08	MKFLRVAFFIFLCSQLLLKISAQDEEEALLYWKSSLLASDSLISWSHGHNQSPCQWRGVGCDSSGSITELNLNSVAVSGTLGKLNFSAIPNLTVLNLSSNQLSGLIPPQIGVLSKLTHLDFTHNNFSGSIPKEIGRMRNLQFIHFYDNSLTGAIPHQLSNLQSLSYLDLSGNYLESPDDPFHFIGFPHLNSLLLGLNSIGPDFPLFVLNCTNLVHLDLSMNLITDPIPLELGKLGKLQQLHLGDNTNMTGQISSFIGNLTKLKNLDMRNIHLNSPIPDELSFCTKLTVLALLNTNLSGPLPPSLKSLTQISDLDLSGNQISGEIHPSLISNWSQLTALQLSSNLLTGHIPTQVGSLHNLTYLDLSRNLLHGTLPSELGNLRNIKSLYLSENHLTGPLPS…	859	2671	https://www.nature.com/articles/s41467-019-12607-6	http://cotton.hzau.edu.cn/EN/Download.htm
PlantKGA_88	Piperales	Piperaceae	Piper	nigrum	Piper nigrum	black pepper	胡椒	chromosome	Yes	基因	evmmodelPn171425	evmmodelPn1714251288xxPlantKGA_88	evm.model.Pn17.1425	L	partial	Pn21	4930377	4933047	-	Pfam	PF13516	Leucine Rich repeat	Leucine-rich repeat	662	677	NTYLQSLNVSHNNLSG	0.3	MKFLRVAFFIFLCSQLLLKISAQDEEEALLYWKSSLLASDSLISWSHGHNQSPCQWRGVGCDSSGSITELNLNSVAVSGTLGKLNFSAIPNLTVLNLSSNQLSGLIPPQIGVLSKLTHLDFTHNNFSGSIPKEIGRMRNLQFIHFYDNSLTGAIPHQLSNLQSLSYLDLSGNYLESPDDPFHFIGFPHLNSLLLGLNSIGPDFPLFVLNCTNLVHLDLSMNLITDPIPLELGKLGKLQQLHLGDNTNMTGQISSFIGNLTKLKNLDMRNIHLNSPIPDELSFCTKLTVLALLNTNLSGPLPPSLKSLTQISDLDLSGNQISGEIHPSLISNWSQLTALQLSSNLLTGHIPTQVGSLHNLTYLDLSRNLLHGTLPSELGNLRNIKSLYLSENHLTGPLPS…	859	2671	https://www.nature.com/articles/s41467-019-12607-6	http://cotton.hzau.edu.cn/EN/Download.htm
PlantKGA_88	Piperales	Piperaceae	Piper	nigrum	Piper nigrum	black pepper	胡椒	chromosome	Yes	基因	evmmodelPn171425	evmmodelPn1714251288xxPlantKGA_88	evm.model.Pn17.1425	L	partial	Pn21	4930377	4933047	-	Pfam	PF13516	Leucine Rich repeat	Leucine-rich repeat	209	226	NCTNLVHLDLSMNLITDP	0.23	MKFLRVAFFIFLCSQLLLKISAQDEEEALLYWKSSLLASDSLISWSHGHNQSPCQWRGVGCDSSGSITELNLNSVAVSGTLGKLNFSAIPNLTVLNLSSNQLSGLIPPQIGVLSKLTHLDFTHNNFSGSIPKEIGRMRNLQFIHFYDNSLTGAIPHQLSNLQSLSYLDLSGNYLESPDDPFHFIGFPHLNSLLLGLNSIGPDFPLFVLNCTNLVHLDLSMNLITDPIPLELGKLGKLQQLHLGDNTNMTGQISSFIGNLTKLKNLDMRNIHLNSPIPDELSFCTKLTVLALLNTNLSGPLPPSLKSLTQISDLDLSGNQISGEIHPSLISNWSQLTALQLSSNLLTGHIPTQVGSLHNLTYLDLSRNLLHGTLPSELGNLRNIKSLYLSENHLTGPLPS…	859	2671	https://www.nature.com/articles/s41467-019-12607-6	http://cotton.hzau.edu.cn/EN/Download.htm
PlantKGA_88	Piperales	Piperaceae	Piper	nigrum	Piper nigrum	black pepper	胡椒	chromosome	Yes	基因	evmmodelPn171425	evmmodelPn1714251288xxPlantKGA_88	evm.model.Pn17.1425	L	partial	Pn21	4930377	4933047	-	Pfam	PF08263	Leucine rich repeat N-terminal domain	Leucine-rich repeat-containing N-terminal, plant-type	23	62	QDEEEALLYWKSSLLASDSLISWSHGHNQSPCQWRGVGCD	3.1e-07	MKFLRVAFFIFLCSQLLLKISAQDEEEALLYWKSSLLASDSLISWSHGHNQSPCQWRGVGCDSSGSITELNLNSVAVSGTLGKLNFSAIPNLTVLNLSSNQLSGLIPPQIGVLSKLTHLDFTHNNFSGSIPKEIGRMRNLQFIHFYDNSLTGAIPHQLSNLQSLSYLDLSGNYLESPDDPFHFIGFPHLNSLLLGLNSIGPDFPLFVLNCTNLVHLDLSMNLITDPIPLELGKLGKLQQLHLGDNTNMTGQISSFIGNLTKLKNLDMRNIHLNSPIPDELSFCTKLTVLALLNTNLSGPLPPSLKSLTQISDLDLSGNQISGEIHPSLISNWSQLTALQLSSNLLTGHIPTQVGSLHNLTYLDLSRNLLHGTLPSELGNLRNIKSLYLSENHLTGPLPS…	859	2671	https://www.nature.com/articles/s41467-019-12607-6	http://cotton.hzau.edu.cn/EN/Download.htm
PlantKGA_88	Piperales	Piperaceae	Piper	nigrum	Piper nigrum	black pepper	胡椒	chromosome	Yes	基因	evmmodelPn171425	evmmodelPn1714251288xxPlantKGA_88	evm.model.Pn17.1425	L	partial	Pn21	4930377	4933047	-	Pfam	PF00560	Leucine Rich Repeat	Leucine-rich repeat	91	112	NLTVLNLSSNQLSGLIPPQIGV	0.24	MKFLRVAFFIFLCSQLLLKISAQDEEEALLYWKSSLLASDSLISWSHGHNQSPCQWRGVGCDSSGSITELNLNSVAVSGTLGKLNFSAIPNLTVLNLSSNQLSGLIPPQIGVLSKLTHLDFTHNNFSGSIPKEIGRMRNLQFIHFYDNSLTGAIPHQLSNLQSLSYLDLSGNYLESPDDPFHFIGFPHLNSLLLGLNSIGPDFPLFVLNCTNLVHLDLSMNLITDPIPLELGKLGKLQQLHLGDNTNMTGQISSFIGNLTKLKNLDMRNIHLNSPIPDELSFCTKLTVLALLNTNLSGPLPPSLKSLTQISDLDLSGNQISGEIHPSLISNWSQLTALQLSSNLLTGHIPTQVGSLHNLTYLDLSRNLLHGTLPSELGNLRNIKSLYLSENHLTGPLPS…	859	2671	https://www.nature.com/articles/s41467-019-12607-6	http://cotton.hzau.edu.cn/EN/Download.htm
PlantKGA_88	Piperales	Piperaceae	Piper	nigrum	Piper nigrum	black pepper	胡椒	chromosome	Yes	基因	evmmodelPn171425	evmmodelPn1714251288xxPlantKGA_88	evm.model.Pn17.1425	L	partial	Pn21	4930377	4933047	-	Pfam	PF00560	Leucine Rich Repeat	Leucine-rich repeat	382	404	NIKSLYLSENHLTGPLPSSFGNL	0.81	MKFLRVAFFIFLCSQLLLKISAQDEEEALLYWKSSLLASDSLISWSHGHNQSPCQWRGVGCDSSGSITELNLNSVAVSGTLGKLNFSAIPNLTVLNLSSNQLSGLIPPQIGVLSKLTHLDFTHNNFSGSIPKEIGRMRNLQFIHFYDNSLTGAIPHQLSNLQSLSYLDLSGNYLESPDDPFHFIGFPHLNSLLLGLNSIGPDFPLFVLNCTNLVHLDLSMNLITDPIPLELGKLGKLQQLHLGDNTNMTGQISSFIGNLTKLKNLDMRNIHLNSPIPDELSFCTKLTVLALLNTNLSGPLPPSLKSLTQISDLDLSGNQISGEIHPSLISNWSQLTALQLSSNLLTGHIPTQVGSLHNLTYLDLSRNLLHGTLPSELGNLRNIKSLYLSENHLTGPLPS…	859	2671	https://www.nature.com/articles/s41467-019-12607-6	http://cotton.hzau.edu.cn/EN/Download.htm
PlantKGA_88	Piperales	Piperaceae	Piper	nigrum	Piper nigrum	black pepper	胡椒	chromosome	Yes	基因	evmmodelPn171428	evmmodelPn1714281288xxPlantKGA_88	evm.model.Pn17.1428	L	partial	Pn21	4879611	4880081	+	Pfam	PF13516	Leucine Rich repeat	Leucine-rich repeat	26	41	NTYLQSLNVSHNNLSG	0.037	MLKQLIKLDVSHNLLSGAIPLEVGMNTYLQSLNVSHNNLSGSIPHALEGARSLISIDISYNNFVGSLPNQFAFEHAYPESLIGNPGLCGRTEQGLMPCDRDGQGLHGTGKTYLKVVIPVLVPTATAIVLALLSMLIFKQKRSNETTTDETFTALED	156	471	https://www.nature.com/articles/s41467-019-12607-6	http://cotton.hzau.edu.cn/EN/Download.htm
PlantKGA_88	Piperales	Piperaceae	Piper	nigrum	Piper nigrum	black pepper	胡椒	chromosome	Yes	基因	evmmodelPn171429	evmmodelPn1714291288xxPlantKGA_88	evm.model.Pn17.1429	L	partial	Pn21	4878277	4879565	+	Pfam	PF00560	Leucine Rich Repeat	Leucine-rich repeat	346	365	NLEELNLSSNRLAGNIPDLF	0.97	MNLITDPIPLELGKLGKLQQLHLGDKTNMTGQISSFIGNLTKLKNLDMRNIHLNSPIPDELSFCTKLTVLALLNTNLSGPLPPSLKSLTQISDLILSHNQLVGSLHNLTYLDLSRNLLHGTLHSELGNLRNIKSLYLSENHLTGPLPSSFGNLVQLQIMTLFNNSLTGNLPPEIGNMKNMAFLSLSYNNFEGSLPQTITNLYNLRLLRLDANNFSGIIPQDFGSPLLQDVGFFLNNFSGQLPPMVFHGRKLEHFSASENKVTGPIPQSIRNCSSLTRLVLSQNRLDGYITNAFGVYPLLKFVYLQENQLHGELAPTWGECESLSTLHLNENFISGHIPPAIGHLINLEELNLSSNRLAGNIPDLFFNPSTKLYRLDLCDNRLSGSIPKEIGNSPELSFL	399	1289	https://www.nature.com/articles/s41467-019-12607-6	http://cotton.hzau.edu.cn/EN/Download.htm
PlantKGA_88	Piperales	Piperaceae	Piper	nigrum	Piper nigrum	black pepper	胡椒	chromosome	Yes	基因	evmmodelPn171429	evmmodelPn1714291288xxPlantKGA_88	evm.model.Pn17.1429	L	partial	Pn21	4878277	4879565	+	Pfam	PF00560	Leucine Rich Repeat	Leucine-rich repeat	131	153	NIKSLYLSENHLTGPLPSSFGNL	0.32	MNLITDPIPLELGKLGKLQQLHLGDKTNMTGQISSFIGNLTKLKNLDMRNIHLNSPIPDELSFCTKLTVLALLNTNLSGPLPPSLKSLTQISDLILSHNQLVGSLHNLTYLDLSRNLLHGTLHSELGNLRNIKSLYLSENHLTGPLPSSFGNLVQLQIMTLFNNSLTGNLPPEIGNMKNMAFLSLSYNNFEGSLPQTITNLYNLRLLRLDANNFSGIIPQDFGSPLLQDVGFFLNNFSGQLPPMVFHGRKLEHFSASENKVTGPIPQSIRNCSSLTRLVLSQNRLDGYITNAFGVYPLLKFVYLQENQLHGELAPTWGECESLSTLHLNENFISGHIPPAIGHLINLEELNLSSNRLAGNIPDLFFNPSTKLYRLDLCDNRLSGSIPKEIGNSPELSFL	399	1289	https://www.nature.com/articles/s41467-019-12607-6	http://cotton.hzau.edu.cn/EN/Download.htm
PlantKGA_88	Piperales	Piperaceae	Piper	nigrum	Piper nigrum	black pepper	胡椒	chromosome	Yes	基因	evmmodelPn171775	evmmodelPn1717751288xxPlantKGA_88	evm.model.Pn17.1775	L	partial	Pn21	348107	349156	+	Pfam	PF13855	Leucine rich repeat	Leucine-rich repeat	6	62	TLTTLLLEESGLSNIPPPFFQKMVNLKVLDLSGTFIDFLPPSILCLKNLEALYLTGC	6.9e-10	MPSCLTLTTLLLEESGLSNIPPPFFQKMVNLKVLDLSGTFIDFLPPSILCLKNLEALYLTGCPNLKAPFTSLEGLVKLRRLQISAFLQDGHKWSFPLHLLSSLTNLEELTIYPSSFYTDYLWSENVDKIVDDIASLERLDSLRFHFPRTDQLQQFIGKSRSWREGTLRLFEFIIGFHNSHMRFPISTYGKMRKQCFELYGRTMILLSNDGCNDHVLLQAITEVLSRAEFCSLDEVHGLQSIAPGMGTAACWNQIEVLHIEECPQLECLVSESANACPEFSKLGRLTLTGLPNLKSIVEAPLPPGCLSLLKNLKLTNCTSLIKLFSIGTFMLPSLKTLDITLCLQMEEIF	349	1050	https://www.nature.com/articles/s41467-019-12607-6	http://cotton.hzau.edu.cn/EN/Download.htm
PlantKGA_88	Piperales	Piperaceae	Piper	nigrum	Piper nigrum	black pepper	胡椒	chromosome	Yes	基因	evmmodelPn17201	evmmodelPn172011288xxPlantKGA_88	evm.model.Pn17.201	L	partial	Pn4	190362	191525	-	Pfam	PF00560	Leucine Rich Repeat	Leucine-rich repeat	199	219	LMHLDLSRNFISGPIPSAFGR	0.37	MRSTTTGGGAGKSAAGLLLLQLLVAVVLVPLLLVVGGAEACPPSDRAALLAFRSSLQEPYLGIFNSWKGADCCHGWYGVSCDPTLHRVADINLRGESEDPIFERAHRTGLMSGTISPAVCRLTRLSTLIIADWKNISGPIPPCIPASLPFLRVFDLVGNRLSGPIPRDIGRLRRLTVLNVADNQISGGIPPSLAALPALMHLDLSRNFISGPIPSAFGRLRMLSRALLARNRISGAIPESIGGMYRLADLDLSMNRMSGAIPEWLGRMPVLSSLYLDGNALSGQVPWSLLASSGLSILNLSKNALEGRIPDSFGPGSYMMILDMAYNRLSGPIPKSITSAAYVGHLDVSHNHLCGRIPAGPPFDHLDAASFVANDCLCGFPLPTPCS	387	1164	https://www.nature.com/articles/s41467-019-12607-6	http://cotton.hzau.edu.cn/EN/Download.htm
PlantKGA_88	Piperales	Piperaceae	Piper	nigrum	Piper nigrum	black pepper	胡椒	chromosome	Yes	基因	evmmodelPn17201	evmmodelPn172011288xxPlantKGA_88	evm.model.Pn17.201	L	partial	Pn4	190362	191525	-	Pfam	PF13855	Leucine rich repeat	Leucine-rich repeat	228	281	LARNRISGAIPESIGGMYRLADLDLSMNRMSGAIPEWLGRMPVLSSLYLDGNAL	1.3e-07	MRSTTTGGGAGKSAAGLLLLQLLVAVVLVPLLLVVGGAEACPPSDRAALLAFRSSLQEPYLGIFNSWKGADCCHGWYGVSCDPTLHRVADINLRGESEDPIFERAHRTGLMSGTISPAVCRLTRLSTLIIADWKNISGPIPPCIPASLPFLRVFDLVGNRLSGPIPRDIGRLRRLTVLNVADNQISGGIPPSLAALPALMHLDLSRNFISGPIPSAFGRLRMLSRALLARNRISGAIPESIGGMYRLADLDLSMNRMSGAIPEWLGRMPVLSSLYLDGNALSGQVPWSLLASSGLSILNLSKNALEGRIPDSFGPGSYMMILDMAYNRLSGPIPKSITSAAYVGHLDVSHNHLCGRIPAGPPFDHLDAASFVANDCLCGFPLPTPCS	387	1164	https://www.nature.com/articles/s41467-019-12607-6	http://cotton.hzau.edu.cn/EN/Download.htm
PlantKGA_88	Piperales	Piperaceae	Piper	nigrum	Piper nigrum	black pepper	胡椒	chromosome	Yes	基因	evmmodelPn17201	evmmodelPn172011288xxPlantKGA_88	evm.model.Pn17.201	L	partial	Pn4	190362	191525	-	Pfam	PF08263	Leucine rich repeat N-terminal domain	Leucine-rich repeat-containing N-terminal, plant-type	43	82	PSDRAALLAFRSSLQEPYLGIFNSWKGADCCHGWYGVSCD	2.8e-10	MRSTTTGGGAGKSAAGLLLLQLLVAVVLVPLLLVVGGAEACPPSDRAALLAFRSSLQEPYLGIFNSWKGADCCHGWYGVSCDPTLHRVADINLRGESEDPIFERAHRTGLMSGTISPAVCRLTRLSTLIIADWKNISGPIPPCIPASLPFLRVFDLVGNRLSGPIPRDIGRLRRLTVLNVADNQISGGIPPSLAALPALMHLDLSRNFISGPIPSAFGRLRMLSRALLARNRISGAIPESIGGMYRLADLDLSMNRMSGAIPEWLGRMPVLSSLYLDGNALSGQVPWSLLASSGLSILNLSKNALEGRIPDSFGPGSYMMILDMAYNRLSGPIPKSITSAAYVGHLDVSHNHLCGRIPAGPPFDHLDAASFVANDCLCGFPLPTPCS	387	1164	https://www.nature.com/articles/s41467-019-12607-6	http://cotton.hzau.edu.cn/EN/Download.htm
PlantKGA_88	Piperales	Piperaceae	Piper	nigrum	Piper nigrum	black pepper	胡椒	chromosome	Yes	基因	evmmodelPn17201	evmmodelPn172011288xxPlantKGA_88	evm.model.Pn17.201	L	partial	Pn4	190362	191525	-	Pfam	PF13516	Leucine Rich repeat	Leucine-rich repeat	173	187	RRLTVLNVADNQISG	1.3	MRSTTTGGGAGKSAAGLLLLQLLVAVVLVPLLLVVGGAEACPPSDRAALLAFRSSLQEPYLGIFNSWKGADCCHGWYGVSCDPTLHRVADINLRGESEDPIFERAHRTGLMSGTISPAVCRLTRLSTLIIADWKNISGPIPPCIPASLPFLRVFDLVGNRLSGPIPRDIGRLRRLTVLNVADNQISGGIPPSLAALPALMHLDLSRNFISGPIPSAFGRLRMLSRALLARNRISGAIPESIGGMYRLADLDLSMNRMSGAIPEWLGRMPVLSSLYLDGNALSGQVPWSLLASSGLSILNLSKNALEGRIPDSFGPGSYMMILDMAYNRLSGPIPKSITSAAYVGHLDVSHNHLCGRIPAGPPFDHLDAASFVANDCLCGFPLPTPCS	387	1164	https://www.nature.com/articles/s41467-019-12607-6	http://cotton.hzau.edu.cn/EN/Download.htm
PlantKGA_88	Piperales	Piperaceae	Piper	nigrum	Piper nigrum	black pepper	胡椒	chromosome	Yes	基因	evmmodelPn17257	evmmodelPn172571288xxPlantKGA_88	evm.model.Pn17.257	L	partial	Pn21	19375398	19377083	-	Pfam	PF08263	Leucine rich repeat N-terminal domain	Leucine-rich repeat-containing N-terminal, plant-type	30	64	SDVNALQGFLKGLESSDLDWRIDSENCCLWEGVKC	6e-05	MKSAQVLVIFLILVLVTHVLHSQVTNCNRSDVNALQGFLKGLESSDLDWRIDSENCCLWEGVKCVNSSKLAPPAALRHLYSAVGCPCYHWLRSTAGCAPPLAALHRRLRSTAGYAFLHSTAGYAFLRSAFRRWLCSAFRRWLTSAFRRWLTSAFRRWLCSAGSAKHTQSPATGRRRLRIR	180	1686	https://www.nature.com/articles/s41467-019-12607-6	http://cotton.hzau.edu.cn/EN/Download.htm
PlantKGA_88	Piperales	Piperaceae	Piper	nigrum	Piper nigrum	black pepper	胡椒	chromosome	Yes	基因	evmmodelPn17371	evmmodelPn173711288xxPlantKGA_88	evm.model.Pn17.371	L	partial	Pn21	20080535	20081815	+	Pfam	PF13855	Leucine rich repeat	Leucine-rich repeat	229	288	PSLSELSIRNNKISGRIPAAVASIQSLQVLDLSHNGLAGAVPAGLFHHPSLQQLTISHNS	2.3e-09	MAAWLSGYVLVVVMVVVVVELAAMAGAATFPADVEALKELKSGLSPESITPGSCVASWDFSFDPCDSLFSDHFTCGFRCSAAGDGGYSRVTEISLDRAGYAGRLSVAGGALPYLEVLDMADNRLSGDIPATVGGLVSLRRLGLSYNSFSGGIPPELGALASLEELFLDNNELAGPIPAALAGLSRLRRLEIQSNQLSGELPDLGALKALAFLHASDNLIAGRLPASLPPSLSELSIRNNKISGRIPAAVASIQSLQVLDLSHNGLAGAVPAGLFHHPSLQQLTISHNSFTELQTPPSFGLRSNLIAMDVSYNKLQGMLPIFPSMMPKLSALSLENNQFTGPVPSQYAIKTVYPSPGVSPLLRLLLGGNYLFGPIPDLLMGMKDGAAAVSLADNCLLLCP…	426	1281	https://www.nature.com/articles/s41467-019-12607-6	http://cotton.hzau.edu.cn/EN/Download.htm
PlantKGA_88	Piperales	Piperaceae	Piper	nigrum	Piper nigrum	black pepper	胡椒	chromosome	Yes	基因	evmmodelPn181055	evmmodelPn1810551288xxPlantKGA_88	evm.model.Pn18.1055	L	partial	Pn16	8777574	8779842	-	Pfam	PF13855	Leucine rich repeat	Leucine-rich repeat	435	490	SLKSVNLSGNFIAYITPGSLPKGLHTLNLSKNKIATIEGLRDLTRLRILNLSYNRI	9.2e-09	MAKFNCFSALIGRKKKTQGEVGEAFDGKKGQRTSQVKLEHGNVGGDSKEADFKETSFNFPVPFEVVGGATCNVKVLNGESSPSLDALDAAYEGEDEHDGKVASMRRGFSDLDLQAKVEEHYLSSEASNLSDAIAASAKANDGDGGAGGGGGEMEVVPSGHVSDPGIANAQDWGSPRLVRSCSNLETRAVLEKVDLQLPKSNSYDDMGNIGGGEFTVPAIHGSPLSVITTMSADKVVLKKGSSSHVLPSRSRKLWWKLFLMSHRNLHRPGVSSSMHLSMKNISKQTDGYCSDTMEGSQATAGMKKESSFKSHKVESPWLFSDELSSKNLHNVHRNQWMAFSSESSGLARVDEWVNMLGMQSPDDADCNETGKTEITIVYPPSPRKSTQPNRHSNGILSED…	584	2269	https://www.nature.com/articles/s41467-019-12607-6	http://cotton.hzau.edu.cn/EN/Download.htm
PlantKGA_88	Piperales	Piperaceae	Piper	nigrum	Piper nigrum	black pepper	胡椒	chromosome	Yes	基因	evmmodelPn181055	evmmodelPn1810551288xxPlantKGA_88	evm.model.Pn18.1055	L	partial	Pn16	8777574	8779842	-	Pfam	PF13516	Leucine Rich repeat	Leucine-rich repeat	524	536	KLTVLDLSFNKIT	0.33	MAKFNCFSALIGRKKKTQGEVGEAFDGKKGQRTSQVKLEHGNVGGDSKEADFKETSFNFPVPFEVVGGATCNVKVLNGESSPSLDALDAAYEGEDEHDGKVASMRRGFSDLDLQAKVEEHYLSSEASNLSDAIAASAKANDGDGGAGGGGGEMEVVPSGHVSDPGIANAQDWGSPRLVRSCSNLETRAVLEKVDLQLPKSNSYDDMGNIGGGEFTVPAIHGSPLSVITTMSADKVVLKKGSSSHVLPSRSRKLWWKLFLMSHRNLHRPGVSSSMHLSMKNISKQTDGYCSDTMEGSQATAGMKKESSFKSHKVESPWLFSDELSSKNLHNVHRNQWMAFSSESSGLARVDEWVNMLGMQSPDDADCNETGKTEITIVYPPSPRKSTQPNRHSNGILSED…	584	2269	https://www.nature.com/articles/s41467-019-12607-6	http://cotton.hzau.edu.cn/EN/Download.htm
PlantKGA_88	Piperales	Piperaceae	Piper	nigrum	Piper nigrum	black pepper	胡椒	chromosome	Yes	基因	evmmodelPn181166	evmmodelPn1811661288xxPlantKGA_88	evm.model.Pn18.1166	L	partial	Pn16	9830322	9834144	-	Pfam	PF13516	Leucine Rich repeat	Leucine-rich repeat	349	371	CITLQELSLSKCSGLTDEGLSEL	0.063	MAPELPSPQPHHSHPKDRSFLPSPPPSSASPSMADALNEELLHTILDLLDENPADKKSFSMACKAFYAAESRHRKTLRPLRPDLLPALLARRYRSLRRLDFSLSPRVSDRALAAAARLCSRTLLAVDLSRSKLFSHAGLASLAAGCGMLVEIDLSNGTELTDAAAAAISRARCLERLWLARCKLITDLGIGCIAVGCQRLRLICLKWCLGLTDMGVGLVAVKCKELRSLDLSYVQITKKCIPAILQLPHLEDLILQGCIVINNKALTTLKYGFKSLKTLNMSNLSNVSHDGILSLINGALSLHQLTLPDCIPVTRAFSNALRQLPSLKSLKLDGCRVTTAGLKAIGDWCITLQELSLSKCSGLTDEGLSELLTKLKGLKKLDITCCRQITQFSMARITS…	693	3823	https://www.nature.com/articles/s41467-019-12607-6	http://cotton.hzau.edu.cn/EN/Download.htm
PlantKGA_88	Piperales	Piperaceae	Piper	nigrum	Piper nigrum	black pepper	胡椒	chromosome	Yes	基因	evmmodelPn181166	evmmodelPn1811661288xxPlantKGA_88	evm.model.Pn18.1166	L	partial	Pn16	9830322	9834144	-	Pfam	PF13516	Leucine Rich repeat	Leucine-rich repeat	425	448	NCTSLEELDVTDNEIDNAGLTSIS	0.00022	MAPELPSPQPHHSHPKDRSFLPSPPPSSASPSMADALNEELLHTILDLLDENPADKKSFSMACKAFYAAESRHRKTLRPLRPDLLPALLARRYRSLRRLDFSLSPRVSDRALAAAARLCSRTLLAVDLSRSKLFSHAGLASLAAGCGMLVEIDLSNGTELTDAAAAAISRARCLERLWLARCKLITDLGIGCIAVGCQRLRLICLKWCLGLTDMGVGLVAVKCKELRSLDLSYVQITKKCIPAILQLPHLEDLILQGCIVINNKALTTLKYGFKSLKTLNMSNLSNVSHDGILSLINGALSLHQLTLPDCIPVTRAFSNALRQLPSLKSLKLDGCRVTTAGLKAIGDWCITLQELSLSKCSGLTDEGLSELLTKLKGLKKLDITCCRQITQFSMARITS…	693	3823	https://www.nature.com/articles/s41467-019-12607-6	http://cotton.hzau.edu.cn/EN/Download.htm
PlantKGA_88	Piperales	Piperaceae	Piper	nigrum	Piper nigrum	black pepper	胡椒	chromosome	Yes	基因	evmmodelPn181166	evmmodelPn1811661288xxPlantKGA_88	evm.model.Pn18.1166	L	partial	Pn16	9830322	9834144	-	Pfam	PF13516	Leucine Rich repeat	Leucine-rich repeat	579	601	SHNLRQVNLSYCSITDVGILALA	0.0014	MAPELPSPQPHHSHPKDRSFLPSPPPSSASPSMADALNEELLHTILDLLDENPADKKSFSMACKAFYAAESRHRKTLRPLRPDLLPALLARRYRSLRRLDFSLSPRVSDRALAAAARLCSRTLLAVDLSRSKLFSHAGLASLAAGCGMLVEIDLSNGTELTDAAAAAISRARCLERLWLARCKLITDLGIGCIAVGCQRLRLICLKWCLGLTDMGVGLVAVKCKELRSLDLSYVQITKKCIPAILQLPHLEDLILQGCIVINNKALTTLKYGFKSLKTLNMSNLSNVSHDGILSLINGALSLHQLTLPDCIPVTRAFSNALRQLPSLKSLKLDGCRVTTAGLKAIGDWCITLQELSLSKCSGLTDEGLSELLTKLKGLKKLDITCCRQITQFSMARITS…	693	3823	https://www.nature.com/articles/s41467-019-12607-6	http://cotton.hzau.edu.cn/EN/Download.htm
PlantKGA_88	Piperales	Piperaceae	Piper	nigrum	Piper nigrum	black pepper	胡椒	chromosome	Yes	基因	evmmodelPn181166	evmmodelPn1811661288xxPlantKGA_88	evm.model.Pn18.1166	L	partial	Pn16	9830322	9834144	-	Pfam	PF13516	Leucine Rich repeat	Leucine-rich repeat	526	550	KCLKLTTLEVRGCSQISSAGLTVFA	1.3	MAPELPSPQPHHSHPKDRSFLPSPPPSSASPSMADALNEELLHTILDLLDENPADKKSFSMACKAFYAAESRHRKTLRPLRPDLLPALLARRYRSLRRLDFSLSPRVSDRALAAAARLCSRTLLAVDLSRSKLFSHAGLASLAAGCGMLVEIDLSNGTELTDAAAAAISRARCLERLWLARCKLITDLGIGCIAVGCQRLRLICLKWCLGLTDMGVGLVAVKCKELRSLDLSYVQITKKCIPAILQLPHLEDLILQGCIVINNKALTTLKYGFKSLKTLNMSNLSNVSHDGILSLINGALSLHQLTLPDCIPVTRAFSNALRQLPSLKSLKLDGCRVTTAGLKAIGDWCITLQELSLSKCSGLTDEGLSELLTKLKGLKKLDITCCRQITQFSMARITS…	693	3823	https://www.nature.com/articles/s41467-019-12607-6	http://cotton.hzau.edu.cn/EN/Download.htm
PlantKGA_88	Piperales	Piperaceae	Piper	nigrum	Piper nigrum	black pepper	胡椒	chromosome	Yes	基因	evmmodelPn181166	evmmodelPn1811661288xxPlantKGA_88	evm.model.Pn18.1166	L	partial	Pn16	9830322	9834144	-	Pfam	PF13516	Leucine Rich repeat	Leucine-rich repeat	324	345	LPSLKSLKLDGCRVTTAGLKAI	0.33	MAPELPSPQPHHSHPKDRSFLPSPPPSSASPSMADALNEELLHTILDLLDENPADKKSFSMACKAFYAAESRHRKTLRPLRPDLLPALLARRYRSLRRLDFSLSPRVSDRALAAAARLCSRTLLAVDLSRSKLFSHAGLASLAAGCGMLVEIDLSNGTELTDAAAAAISRARCLERLWLARCKLITDLGIGCIAVGCQRLRLICLKWCLGLTDMGVGLVAVKCKELRSLDLSYVQITKKCIPAILQLPHLEDLILQGCIVINNKALTTLKYGFKSLKTLNMSNLSNVSHDGILSLINGALSLHQLTLPDCIPVTRAFSNALRQLPSLKSLKLDGCRVTTAGLKAIGDWCITLQELSLSKCSGLTDEGLSELLTKLKGLKKLDITCCRQITQFSMARITS…	693	3823	https://www.nature.com/articles/s41467-019-12607-6	http://cotton.hzau.edu.cn/EN/Download.htm
PlantKGA_88	Piperales	Piperaceae	Piper	nigrum	Piper nigrum	black pepper	胡椒	chromosome	Yes	基因	evmmodelPn18290	evmmodelPn182901288xxPlantKGA_88	evm.model.Pn18.290	L	partial	Pn16	19082563	19083798	+	Pfam	PF13855	Leucine rich repeat	Leucine-rich repeat	130	189	NLTILAVPGNFLHGEIPATFSNLRLLKTLDLSYNLLSGPIPWSLGEIPSLTNAILAHNRL	7.5e-07	MAKTRSSMSTILLLLLIFTTILLRASPVYAFLDPLDFLVLQSLKKSLRDVPGGTFFSAWDFTSDPCNFPGVFCKSDKVVELNLGDPRAGSPGLTGRLDPSLANLSSLSVLSIVPGRIFGRIPDSISLCGNLTILAVPGNFLHGEIPATFSNLRLLKTLDLSYNLLSGPIPWSLGEIPSLTNAILAHNRLSGAIPPFFATNLRRLDLGHNHLSGDLALYSLPPSLQYLSFTSNRLTGPVDRVITRLGRLNYLDLSMNRFIGRLPADVFSFPFLSSLILHRNRFTGLVRPTSQVEIQTVDLSYNRLYGRISPLLSMVQNLYLNNNRFMGPVPSGFVDRLLDGRIRVLYLQHNFLTGIDLNPTADIPLSSSLCLQYNCMVPPVQTVCPAKAGWVKTRPPDQC…	411	1236	https://www.nature.com/articles/s41467-019-12607-6	http://cotton.hzau.edu.cn/EN/Download.htm
PlantKGA_88	Piperales	Piperaceae	Piper	nigrum	Piper nigrum	black pepper	胡椒	chromosome	Yes	基因	evmmodelPn18290	evmmodelPn182901288xxPlantKGA_88	evm.model.Pn18.290	L	partial	Pn16	19082563	19083798	+	Pfam	PF13516	Leucine Rich repeat	Leucine-rich repeat	199	213	TNLRRLDLGHNHLSG	0.97	MAKTRSSMSTILLLLLIFTTILLRASPVYAFLDPLDFLVLQSLKKSLRDVPGGTFFSAWDFTSDPCNFPGVFCKSDKVVELNLGDPRAGSPGLTGRLDPSLANLSSLSVLSIVPGRIFGRIPDSISLCGNLTILAVPGNFLHGEIPATFSNLRLLKTLDLSYNLLSGPIPWSLGEIPSLTNAILAHNRLSGAIPPFFATNLRRLDLGHNHLSGDLALYSLPPSLQYLSFTSNRLTGPVDRVITRLGRLNYLDLSMNRFIGRLPADVFSFPFLSSLILHRNRFTGLVRPTSQVEIQTVDLSYNRLYGRISPLLSMVQNLYLNNNRFMGPVPSGFVDRLLDGRIRVLYLQHNFLTGIDLNPTADIPLSSSLCLQYNCMVPPVQTVCPAKAGWVKTRPPDQC…	411	1236	https://www.nature.com/articles/s41467-019-12607-6	http://cotton.hzau.edu.cn/EN/Download.htm
PlantKGA_88	Piperales	Piperaceae	Piper	nigrum	Piper nigrum	black pepper	胡椒	chromosome	Yes	基因	evmmodelPn18290	evmmodelPn182901288xxPlantKGA_88	evm.model.Pn18.290	L	partial	Pn16	19082563	19083798	+	Pfam	PF08263	Leucine rich repeat N-terminal domain	Leucine-rich repeat-containing N-terminal, plant-type	36	73	DFLVLQSLKKSLRDVPGGTFFSAWDFTSDPCNFPGVFC	1.2e-06	MAKTRSSMSTILLLLLIFTTILLRASPVYAFLDPLDFLVLQSLKKSLRDVPGGTFFSAWDFTSDPCNFPGVFCKSDKVVELNLGDPRAGSPGLTGRLDPSLANLSSLSVLSIVPGRIFGRIPDSISLCGNLTILAVPGNFLHGEIPATFSNLRLLKTLDLSYNLLSGPIPWSLGEIPSLTNAILAHNRLSGAIPPFFATNLRRLDLGHNHLSGDLALYSLPPSLQYLSFTSNRLTGPVDRVITRLGRLNYLDLSMNRFIGRLPADVFSFPFLSSLILHRNRFTGLVRPTSQVEIQTVDLSYNRLYGRISPLLSMVQNLYLNNNRFMGPVPSGFVDRLLDGRIRVLYLQHNFLTGIDLNPTADIPLSSSLCLQYNCMVPPVQTVCPAKAGWVKTRPPDQC…	411	1236	https://www.nature.com/articles/s41467-019-12607-6	http://cotton.hzau.edu.cn/EN/Download.htm
PlantKGA_88	Piperales	Piperaceae	Piper	nigrum	Piper nigrum	black pepper	胡椒	chromosome	Yes	基因	evmmodelPn19118	evmmodelPn191181288xxPlantKGA_88	evm.model.Pn19.118	L	partial	Pn5	35660645	35661777	+	Pfam	PF13855	Leucine rich repeat	Leucine-rich repeat	144	201	LALLHINTNRFCGVVPDSVARLKLLFELDLSNNRFVGKFPAVVLKLPSLKFLDLRYNE	4.8e-07	MKEKTFYLNFCGHCSLLLLILFASAAAAFSGPGLTDGEARYIRRRQLLAEGGVGAAPMVDPSLEFDNPRLRDAYIALRAWKSAIFSDPMNLTADWSGPDVCGYNGVYCAPAPDNSSIVTVAGIDLNHGDIAGYLPAELGLLADLALLHINTNRFCGVVPDSVARLKLLFELDLSNNRFVGKFPAVVLKLPSLKFLDLRYNEFEGPVPPELFDRPLDAIFLNNNRFRFQIPDNIGNSPVSVVVLAGNRFGGCLPASIGNMSATLNEIILMDNGLRSCFPAELGMLRELTVLDVSENELVGPLPEEVGGMEKLEQFNVAHNLLSGKIPATTGVPSAAGVRRSEELLAREAGAEVSGAV	356	1133	https://www.nature.com/articles/s41467-019-12607-6	http://cotton.hzau.edu.cn/EN/Download.htm
PlantKGA_88	Piperales	Piperaceae	Piper	nigrum	Piper nigrum	black pepper	胡椒	chromosome	Yes	基因	evmmodelPn19118	evmmodelPn191181288xxPlantKGA_88	evm.model.Pn19.118	L	partial	Pn5	35660645	35661777	+	Pfam	PF08263	Leucine rich repeat N-terminal domain	Leucine-rich repeat-containing N-terminal, plant-type	76	108	ALRAWKSAIFSDPMNLTADWSGPDVCGYNGVYC	0.00046	MKEKTFYLNFCGHCSLLLLILFASAAAAFSGPGLTDGEARYIRRRQLLAEGGVGAAPMVDPSLEFDNPRLRDAYIALRAWKSAIFSDPMNLTADWSGPDVCGYNGVYCAPAPDNSSIVTVAGIDLNHGDIAGYLPAELGLLADLALLHINTNRFCGVVPDSVARLKLLFELDLSNNRFVGKFPAVVLKLPSLKFLDLRYNEFEGPVPPELFDRPLDAIFLNNNRFRFQIPDNIGNSPVSVVVLAGNRFGGCLPASIGNMSATLNEIILMDNGLRSCFPAELGMLRELTVLDVSENELVGPLPEEVGGMEKLEQFNVAHNLLSGKIPATTGVPSAAGVRRSEELLAREAGAEVSGAV	356	1133	https://www.nature.com/articles/s41467-019-12607-6	http://cotton.hzau.edu.cn/EN/Download.htm
PlantKGA_88	Piperales	Piperaceae	Piper	nigrum	Piper nigrum	black pepper	胡椒	chromosome	Yes	基因	evmmodelPn19119	evmmodelPn191191288xxPlantKGA_88	evm.model.Pn19.119	L	partial	Pn5	35648637	35655694	+	Pfam	PF13855	Leucine rich repeat	Leucine-rich repeat	144	201	LALLHINTNRFCGVVPDSVARLKLLFELDLSNNRFVGKFPAVVLKLPSLKFLDLRYNE	8.8e-07	MKEKTFYLNFCGHCSLLLLILFASAAAAFSGPGLTDGEARYIRRRQLLAEGGVGAAPTVDPSLEFDNPRLRDAYIALRAWKSAIFSDPMNLTADWSGPDVCGYNGVYCAPAPDNSSIVTVAGIDLNHGDIAGYLPAELGLLADLALLHINTNRFCGVVPDSVARLKLLFELDLSNNRFVGKFPAVVLKLPSLKFLDLRYNEFEGPVPPELFDRPLDAIFLNNNRFRFQIPDNIGNSPVSVVVLAGNRFGGCLPASIGNMSATLNEIILMDNGLRSCFPAELGMLRELTVLDVSENELVGPLPEEVGGMEKLEQFNVAHNLLSGKIPASVCELKSLDNFTYSYNFFSGEPPACLRLPEFDDRRNCLPGRPAQRSPEQCRAFLSRPPVDCSSFNCAPSVPA…	542	7058	https://www.nature.com/articles/s41467-019-12607-6	http://cotton.hzau.edu.cn/EN/Download.htm
PlantKGA_88	Piperales	Piperaceae	Piper	nigrum	Piper nigrum	black pepper	胡椒	chromosome	Yes	基因	evmmodelPn19640	evmmodelPn196401288xxPlantKGA_88	evm.model.Pn19.640	L	partial	Pn5	32281585	32284815	-	Pfam	PF00560	Leucine Rich Repeat	Leucine-rich repeat	804	826	SLQVLNVAGNCLNGSIPKSFGNF	0.79	MAKLLLLYSYLGFFTLFSINQCLCLDYYHPHCLPSQETALIKFKESLIDPSNRLESWQLGSDCCSWRGITCDNQTGYVIAMDLHNPQNPYANLPYDEHHKGWLASLDVSLGGKLGTSLMDLKKLQVLDLSLNSFEGIRIPEFIGSLVELKHLDLSYAGFHGRIPPNLGNLSKLEHLDVSSLVHTNANIRFYVAQLYSRARTSSLSCDNLQWMTSLVSLKVIQMNGVNLSALSHEPMHVFSSLPSLEELGLSLCSLSASNNKTFSNFTSLQFLDLSSNYIASEFPRWVINITSLQYMDLSFNSFRGEFMYGLSDLPSLQVMYMSLNLVKVNCTKLFAGKWSNIAYLGIDYTDISGSIPSSIGNITSLEHLNVMSNRRMRNCLEGNIPQEIGKLKKLEYLS…	1076	3231	https://www.nature.com/articles/s41467-019-12607-6	http://cotton.hzau.edu.cn/EN/Download.htm
PlantKGA_88	Piperales	Piperaceae	Piper	nigrum	Piper nigrum	black pepper	胡椒	chromosome	Yes	基因	evmmodelPn19640	evmmodelPn196401288xxPlantKGA_88	evm.model.Pn19.640	L	partial	Pn5	32281585	32284815	-	Pfam	PF13855	Leucine rich repeat	Leucine-rich repeat	666	718	ASNNEITGLIPVVFGNMDRLATLDLSSNKLNGTVPQNLVGSPLRSLDLSGNNL	2.9e-08	MAKLLLLYSYLGFFTLFSINQCLCLDYYHPHCLPSQETALIKFKESLIDPSNRLESWQLGSDCCSWRGITCDNQTGYVIAMDLHNPQNPYANLPYDEHHKGWLASLDVSLGGKLGTSLMDLKKLQVLDLSLNSFEGIRIPEFIGSLVELKHLDLSYAGFHGRIPPNLGNLSKLEHLDVSSLVHTNANIRFYVAQLYSRARTSSLSCDNLQWMTSLVSLKVIQMNGVNLSALSHEPMHVFSSLPSLEELGLSLCSLSASNNKTFSNFTSLQFLDLSSNYIASEFPRWVINITSLQYMDLSFNSFRGEFMYGLSDLPSLQVMYMSLNLVKVNCTKLFAGKWSNIAYLGIDYTDISGSIPSSIGNITSLEHLNVMSNRRMRNCLEGNIPQEIGKLKKLEYLS…	1076	3231	https://www.nature.com/articles/s41467-019-12607-6	http://cotton.hzau.edu.cn/EN/Download.htm
PlantKGA_88	Piperales	Piperaceae	Piper	nigrum	Piper nigrum	black pepper	胡椒	chromosome	Yes	基因	evmmodelPn19640	evmmodelPn196401288xxPlantKGA_88	evm.model.Pn19.640	L	partial	Pn5	32281585	32284815	-	Pfam	PF13855	Leucine rich repeat	Leucine-rich repeat	468	527	LTTLALDRNQLNGTIPVELGKLSQLENLDLSHNSFQGLVHDTHFQNLNNLSTLDLSHNAI	1.2e-07	MAKLLLLYSYLGFFTLFSINQCLCLDYYHPHCLPSQETALIKFKESLIDPSNRLESWQLGSDCCSWRGITCDNQTGYVIAMDLHNPQNPYANLPYDEHHKGWLASLDVSLGGKLGTSLMDLKKLQVLDLSLNSFEGIRIPEFIGSLVELKHLDLSYAGFHGRIPPNLGNLSKLEHLDVSSLVHTNANIRFYVAQLYSRARTSSLSCDNLQWMTSLVSLKVIQMNGVNLSALSHEPMHVFSSLPSLEELGLSLCSLSASNNKTFSNFTSLQFLDLSSNYIASEFPRWVINITSLQYMDLSFNSFRGEFMYGLSDLPSLQVMYMSLNLVKVNCTKLFAGKWSNIAYLGIDYTDISGSIPSSIGNITSLEHLNVMSNRRMRNCLEGNIPQEIGKLKKLEYLS…	1076	3231	https://www.nature.com/articles/s41467-019-12607-6	http://cotton.hzau.edu.cn/EN/Download.htm
PlantKGA_88	Piperales	Piperaceae	Piper	nigrum	Piper nigrum	black pepper	胡椒	chromosome	Yes	基因	evmmodelPn19640	evmmodelPn196401288xxPlantKGA_88	evm.model.Pn19.640	L	partial	Pn5	32281585	32284815	-	Pfam	PF08263	Leucine rich repeat N-terminal domain	Leucine-rich repeat-containing N-terminal, plant-type	34	72	PSQETALIKFKESLIDPSNRLESWQLGSDCCSWRGITCD	1.2e-13	MAKLLLLYSYLGFFTLFSINQCLCLDYYHPHCLPSQETALIKFKESLIDPSNRLESWQLGSDCCSWRGITCDNQTGYVIAMDLHNPQNPYANLPYDEHHKGWLASLDVSLGGKLGTSLMDLKKLQVLDLSLNSFEGIRIPEFIGSLVELKHLDLSYAGFHGRIPPNLGNLSKLEHLDVSSLVHTNANIRFYVAQLYSRARTSSLSCDNLQWMTSLVSLKVIQMNGVNLSALSHEPMHVFSSLPSLEELGLSLCSLSASNNKTFSNFTSLQFLDLSSNYIASEFPRWVINITSLQYMDLSFNSFRGEFMYGLSDLPSLQVMYMSLNLVKVNCTKLFAGKWSNIAYLGIDYTDISGSIPSSIGNITSLEHLNVMSNRRMRNCLEGNIPQEIGKLKKLEYLS…	1076	3231	https://www.nature.com/articles/s41467-019-12607-6	http://cotton.hzau.edu.cn/EN/Download.htm
PlantKGA_88	Piperales	Piperaceae	Piper	nigrum	Piper nigrum	black pepper	胡椒	chromosome	Yes	基因	evmmodelPn19641	evmmodelPn196411288xxPlantKGA_88	evm.model.Pn19.641	L	partial	Pn5	32292223	32293449	-	Pfam	PF13855	Leucine rich repeat	Leucine-rich repeat	163	222	PSLEELGLSLCSLSASKNITFSNFPSLQFIDFSSNYMASEFPRWVVSITSLQYLVLPDNS	1.9e-06	MRLPGLLSSTLPSLPRSSSNQIQGGPQPAHQILSSLGSLDQTAAVGEESPATTKPGIRIPEFIGSLVELKHLDPSFVGFHGRIPPNLGNLSKLEHLDVSSLVHTNATTSSSVVQIVNGGRTSSLSCDNLQWMRSLVSLKVIQMNEVNLSALGHEPMHVFSSLPSLEELGLSLCSLSASKNITFSNFPSLQFIDFSSNYMASEFPRWVVSITSLQYLVLPDNSFRGEFMYGLADLPSMQVMYMSLNFVKVNCTKLFAGKWSNIAYLDIDYTNFSGSIPSSIGNITSLKHSNVLSNPRMRNGLEGNIPQEIGKLKKQEFLSLKFNKYVGKFPPKIFNPQFLRYLELDGVEF	349	1227	https://www.nature.com/articles/s41467-019-12607-6	http://cotton.hzau.edu.cn/EN/Download.htm
PlantKGA_88	Piperales	Piperaceae	Piper	nigrum	Piper nigrum	black pepper	胡椒	chromosome	Yes	基因	evmmodelPn19643	evmmodelPn196431288xxPlantKGA_88	evm.model.Pn19.643	L	partial	Pn5	32339255	32342479	-	Pfam	PF08263	Leucine rich repeat N-terminal domain	Leucine-rich repeat-containing N-terminal, plant-type	34	72	PSEEAALIKFKEGLIDPSNRLESWQLGSDCCSWRGITCD	2.1e-13	MAKLLLLYSYLGLFTLFSINQCVSLDSYHPHCLPSEEAALIKFKEGLIDPSNRLESWQLGSDCCSWRGITCDNQTGYVIAMDLHNPQNPYANLPFDEHHKGWLASLDVSLGGKLGTSLMDLKKLQFLDLRLNSFEGIRIPEFIGSLVELKHLDLSYAGFHGRIPPNLGNLSKLEHLDVSSLVHTTSSYVAQIFNGAHASLLSCDNLQWMTSLVSLKVIQMNAVNLSELGHEPMHVFSSFPSLEELGLSLCSLSASNHITFSNFTSLQFLDLSSNFFASEFPRWVVNMTSLQYLDLSYNFFIGEFMYGLSDLPSLQVMYMVHNLVKVNCTRLFAGKWSKIAYLDIDYTDFSGSIPSSIGNITSLKRLSVMSFERMRNGLDGNIPQQIGKLKKLEFLSLRY…	1074	3225	https://www.nature.com/articles/s41467-019-12607-6	http://cotton.hzau.edu.cn/EN/Download.htm
PlantKGA_88	Piperales	Piperaceae	Piper	nigrum	Piper nigrum	black pepper	胡椒	chromosome	Yes	基因	evmmodelPn19643	evmmodelPn196431288xxPlantKGA_88	evm.model.Pn19.643	L	partial	Pn5	32339255	32342479	-	Pfam	PF13855	Leucine rich repeat	Leucine-rich repeat	729	788	ALRSLHLAENALSGEFPAWLENCTHLEVLVLSQNKFSGKIPQWIGESSASLKILDLRSNM	2e-06	MAKLLLLYSYLGLFTLFSINQCVSLDSYHPHCLPSEEAALIKFKEGLIDPSNRLESWQLGSDCCSWRGITCDNQTGYVIAMDLHNPQNPYANLPFDEHHKGWLASLDVSLGGKLGTSLMDLKKLQFLDLRLNSFEGIRIPEFIGSLVELKHLDLSYAGFHGRIPPNLGNLSKLEHLDVSSLVHTTSSYVAQIFNGAHASLLSCDNLQWMTSLVSLKVIQMNAVNLSELGHEPMHVFSSFPSLEELGLSLCSLSASNHITFSNFTSLQFLDLSSNFFASEFPRWVVNMTSLQYLDLSYNFFIGEFMYGLSDLPSLQVMYMVHNLVKVNCTRLFAGKWSKIAYLDIDYTDFSGSIPSSIGNITSLKRLSVMSFERMRNGLDGNIPQQIGKLKKLEFLSLRY…	1074	3225	https://www.nature.com/articles/s41467-019-12607-6	http://cotton.hzau.edu.cn/EN/Download.htm
PlantKGA_88	Piperales	Piperaceae	Piper	nigrum	Piper nigrum	black pepper	胡椒	chromosome	Yes	基因	evmmodelPn19643	evmmodelPn196431288xxPlantKGA_88	evm.model.Pn19.643	L	partial	Pn5	32339255	32342479	-	Pfam	PF13855	Leucine rich repeat	Leucine-rich repeat	663	716	ASNNEISGLVPVVFGNMDRLATLDLSTNKLNGTVPQNLVGSPRLRALDLSGNNL	8.8e-10	MAKLLLLYSYLGLFTLFSINQCVSLDSYHPHCLPSEEAALIKFKEGLIDPSNRLESWQLGSDCCSWRGITCDNQTGYVIAMDLHNPQNPYANLPFDEHHKGWLASLDVSLGGKLGTSLMDLKKLQFLDLRLNSFEGIRIPEFIGSLVELKHLDLSYAGFHGRIPPNLGNLSKLEHLDVSSLVHTTSSYVAQIFNGAHASLLSCDNLQWMTSLVSLKVIQMNAVNLSELGHEPMHVFSSFPSLEELGLSLCSLSASNHITFSNFTSLQFLDLSSNFFASEFPRWVVNMTSLQYLDLSYNFFIGEFMYGLSDLPSLQVMYMVHNLVKVNCTRLFAGKWSKIAYLDIDYTDFSGSIPSSIGNITSLKRLSVMSFERMRNGLDGNIPQQIGKLKKLEFLSLRY…	1074	3225	https://www.nature.com/articles/s41467-019-12607-6	http://cotton.hzau.edu.cn/EN/Download.htm
PlantKGA_88	Piperales	Piperaceae	Piper	nigrum	Piper nigrum	black pepper	胡椒	chromosome	Yes	基因	evmmodelPn19643	evmmodelPn196431288xxPlantKGA_88	evm.model.Pn19.643	L	partial	Pn5	32339255	32342479	-	Pfam	PF13855	Leucine rich repeat	Leucine-rich repeat	465	524	LTTLALARNHLKGTIPVELGKLSQLEILDLSHNSFQGIVHDTHFQNLNSLSELELSHNAI	8.4e-09	MAKLLLLYSYLGLFTLFSINQCVSLDSYHPHCLPSEEAALIKFKEGLIDPSNRLESWQLGSDCCSWRGITCDNQTGYVIAMDLHNPQNPYANLPFDEHHKGWLASLDVSLGGKLGTSLMDLKKLQFLDLRLNSFEGIRIPEFIGSLVELKHLDLSYAGFHGRIPPNLGNLSKLEHLDVSSLVHTTSSYVAQIFNGAHASLLSCDNLQWMTSLVSLKVIQMNAVNLSELGHEPMHVFSSFPSLEELGLSLCSLSASNHITFSNFTSLQFLDLSSNFFASEFPRWVVNMTSLQYLDLSYNFFIGEFMYGLSDLPSLQVMYMVHNLVKVNCTRLFAGKWSKIAYLDIDYTDFSGSIPSSIGNITSLKRLSVMSFERMRNGLDGNIPQQIGKLKKLEFLSLRY…	1074	3225	https://www.nature.com/articles/s41467-019-12607-6	http://cotton.hzau.edu.cn/EN/Download.htm
PlantKGA_88	Piperales	Piperaceae	Piper	nigrum	Piper nigrum	black pepper	胡椒	chromosome	Yes	基因	evmmodelPn19643	evmmodelPn196431288xxPlantKGA_88	evm.model.Pn19.643	L	partial	Pn5	32339255	32342479	-	Pfam	PF13855	Leucine rich repeat	Leucine-rich repeat	536	597	PNLYIVGLSSCQIGPFFPSWVKELEHVSILDLSRNEVKGSLPQWFWEIVPVLIHLNLSHNRI	1.8e-06	MAKLLLLYSYLGLFTLFSINQCVSLDSYHPHCLPSEEAALIKFKEGLIDPSNRLESWQLGSDCCSWRGITCDNQTGYVIAMDLHNPQNPYANLPFDEHHKGWLASLDVSLGGKLGTSLMDLKKLQFLDLRLNSFEGIRIPEFIGSLVELKHLDLSYAGFHGRIPPNLGNLSKLEHLDVSSLVHTTSSYVAQIFNGAHASLLSCDNLQWMTSLVSLKVIQMNAVNLSELGHEPMHVFSSFPSLEELGLSLCSLSASNHITFSNFTSLQFLDLSSNFFASEFPRWVVNMTSLQYLDLSYNFFIGEFMYGLSDLPSLQVMYMVHNLVKVNCTRLFAGKWSKIAYLDIDYTDFSGSIPSSIGNITSLKRLSVMSFERMRNGLDGNIPQQIGKLKKLEFLSLRY…	1074	3225	https://www.nature.com/articles/s41467-019-12607-6	http://cotton.hzau.edu.cn/EN/Download.htm
PlantKGA_88	Piperales	Piperaceae	Piper	nigrum	Piper nigrum	black pepper	胡椒	chromosome	Yes	基因	evmmodelPn19670	evmmodelPn196701288xxPlantKGA_88	evm.model.Pn19.670	L	partial	Pn5	32768330	32771332	-	Pfam	PF08263	Leucine rich repeat N-terminal domain	Leucine-rich repeat-containing N-terminal, plant-type	34	72	PSQEAALIKFKEGLIDPSNRLESWQHGSDCCSWRGITCD	3.8e-14	MAKLLLLCSYLSLFTLFSINLCVSLDYYHPHCLPSQEAALIKFKEGLIDPSNRLESWQHGSDCCSWRGITCDNQTGYVIAMDLHNPQNPYAKLLFEEHHGWLHLTSHFIAKLRQPSMDDESCFIESHPNEWGEPFSIEPMHVFSSLPSLEKLGLSLCSLSASNNITFSNFTSLQFLDLSSNYIATELPRWVVNITSLQYLDLSYNLFIGEIMYGLSDLPSLQVMSLADNFVKVNCSKLFAGKWSNIAYLDIDYTDISGSIPSSIGNITSLKGLYVMSNSRMRNGLEGNIPQEIGKLKKLECLSLKYNKFVGKFPPKIINPLFLRYLQLDGVELQSSVNLHWFCQFKFLVGIWLSNCHLTGPIPTCLAEMPFLGILVLAKNHLNGTIPVELGKLSQLEIL…	884	3003	https://www.nature.com/articles/s41467-019-12607-6	http://cotton.hzau.edu.cn/EN/Download.htm
PlantKGA_88	Piperales	Piperaceae	Piper	nigrum	Piper nigrum	black pepper	胡椒	chromosome	Yes	基因	evmmodelPn19670	evmmodelPn196701288xxPlantKGA_88	evm.model.Pn19.670	L	partial	Pn5	32768330	32771332	-	Pfam	PF00560	Leucine Rich Repeat	Leucine-rich repeat	709	731	SLQVLNVAGNYLNGSIPKSFGNL	1.8	MAKLLLLCSYLSLFTLFSINLCVSLDYYHPHCLPSQEAALIKFKEGLIDPSNRLESWQHGSDCCSWRGITCDNQTGYVIAMDLHNPQNPYAKLLFEEHHGWLHLTSHFIAKLRQPSMDDESCFIESHPNEWGEPFSIEPMHVFSSLPSLEKLGLSLCSLSASNNITFSNFTSLQFLDLSSNYIATELPRWVVNITSLQYLDLSYNLFIGEIMYGLSDLPSLQVMSLADNFVKVNCSKLFAGKWSNIAYLDIDYTDISGSIPSSIGNITSLKGLYVMSNSRMRNGLEGNIPQEIGKLKKLECLSLKYNKFVGKFPPKIINPLFLRYLQLDGVELQSSVNLHWFCQFKFLVGIWLSNCHLTGPIPTCLAEMPFLGILVLAKNHLNGTIPVELGKLSQLEIL…	884	3003	https://www.nature.com/articles/s41467-019-12607-6	http://cotton.hzau.edu.cn/EN/Download.htm
PlantKGA_88	Piperales	Piperaceae	Piper	nigrum	Piper nigrum	black pepper	胡椒	chromosome	Yes	基因	evmmodelPn19670	evmmodelPn196701288xxPlantKGA_88	evm.model.Pn19.670	L	partial	Pn5	32768330	32771332	-	Pfam	PF13855	Leucine rich repeat	Leucine-rich repeat	147	206	PSLEKLGLSLCSLSASNNITFSNFTSLQFLDLSSNYIATELPRWVVNITSLQYLDLSYNL	2.2e-08	MAKLLLLCSYLSLFTLFSINLCVSLDYYHPHCLPSQEAALIKFKEGLIDPSNRLESWQHGSDCCSWRGITCDNQTGYVIAMDLHNPQNPYAKLLFEEHHGWLHLTSHFIAKLRQPSMDDESCFIESHPNEWGEPFSIEPMHVFSSLPSLEKLGLSLCSLSASNNITFSNFTSLQFLDLSSNYIATELPRWVVNITSLQYLDLSYNLFIGEIMYGLSDLPSLQVMSLADNFVKVNCSKLFAGKWSNIAYLDIDYTDISGSIPSSIGNITSLKGLYVMSNSRMRNGLEGNIPQEIGKLKKLECLSLKYNKFVGKFPPKIINPLFLRYLQLDGVELQSSVNLHWFCQFKFLVGIWLSNCHLTGPIPTCLAEMPFLGILVLAKNHLNGTIPVELGKLSQLEIL…	884	3003	https://www.nature.com/articles/s41467-019-12607-6	http://cotton.hzau.edu.cn/EN/Download.htm
PlantKGA_88	Piperales	Piperaceae	Piper	nigrum	Piper nigrum	black pepper	胡椒	chromosome	Yes	基因	evmmodelPn19670	evmmodelPn196701288xxPlantKGA_88	evm.model.Pn19.670	L	partial	Pn5	32768330	32771332	-	Pfam	PF13855	Leucine rich repeat	Leucine-rich repeat	570	623	ASNNEISGLVPVVFGNMDCLETLDLSTNKLNGTVPKNLVGSPRLRALDLSGNNL	1.4e-09	MAKLLLLCSYLSLFTLFSINLCVSLDYYHPHCLPSQEAALIKFKEGLIDPSNRLESWQHGSDCCSWRGITCDNQTGYVIAMDLHNPQNPYAKLLFEEHHGWLHLTSHFIAKLRQPSMDDESCFIESHPNEWGEPFSIEPMHVFSSLPSLEKLGLSLCSLSASNNITFSNFTSLQFLDLSSNYIATELPRWVVNITSLQYLDLSYNLFIGEIMYGLSDLPSLQVMSLADNFVKVNCSKLFAGKWSNIAYLDIDYTDISGSIPSSIGNITSLKGLYVMSNSRMRNGLEGNIPQEIGKLKKLECLSLKYNKFVGKFPPKIINPLFLRYLQLDGVELQSSVNLHWFCQFKFLVGIWLSNCHLTGPIPTCLAEMPFLGILVLAKNHLNGTIPVELGKLSQLEIL…	884	3003	https://www.nature.com/articles/s41467-019-12607-6	http://cotton.hzau.edu.cn/EN/Download.htm
PlantKGA_88	Piperales	Piperaceae	Piper	nigrum	Piper nigrum	black pepper	胡椒	chromosome	Yes	基因	evmmodelPn19672	evmmodelPn196721288xxPlantKGA_88	evm.model.Pn19.672	L	partial	Pn5	32782589	32792358	-	Pfam	PF13855	Leucine rich repeat	Leucine-rich repeat	442	501	LTILALDRNHLNGTIPVELGKLSQLDILDLSRNSFQGIVHDTHFQNLNRLSMLDLSRNAI	4.5e-08	MAKLLLLYSYLGLFTLFSINQCVSLDSYHPHCLPSQEAALIKFKEGLIDPSNRLESWQLGSDCCSWRGITCDNQTGYVIAMDLHNPQNPYANLPFDEHHKGWLGSLDVSLGGKLGTSLMDLKKLQVLDLSLNSFEGIRIPEFIGSLVELKHLDLSYAGFHGRIPPNLGNLSKLEHLDVSSLVHTTSSYVAQIFNGAHTSLLSCDNLQWMTSLVSLKVIQMNGVNLSALGHEPMHVLSSLPSLEVLGLPWCSLSASKNITFSNFTSLQFLDLSSNYFASEFPRWVVNITSLQYSDLSHNSFSGEFMYGLSDLPSLQVMYMVHNLVKVNCTRLFAGKWSKIAYLDIDYTEFSGSIPSSIGNITSLKRLSVMSYERMRNGLDGNIPQQIGKLKKLEFLSLRY…	1286	9770	https://www.nature.com/articles/s41467-019-12607-6	http://cotton.hzau.edu.cn/EN/Download.htm
PlantKGA_88	Piperales	Piperaceae	Piper	nigrum	Piper nigrum	black pepper	胡椒	chromosome	Yes	基因	evmmodelPn19672	evmmodelPn196721288xxPlantKGA_88	evm.model.Pn19.672	L	partial	Pn5	32782589	32792358	-	Pfam	PF13855	Leucine rich repeat	Leucine-rich repeat	640	693	ASNNEITGLIPVVFGNMDRLETLDLSTNKLNGTVPQNLVGSPRLRALDLSGNNL	6.6e-11	MAKLLLLYSYLGLFTLFSINQCVSLDSYHPHCLPSQEAALIKFKEGLIDPSNRLESWQLGSDCCSWRGITCDNQTGYVIAMDLHNPQNPYANLPFDEHHKGWLGSLDVSLGGKLGTSLMDLKKLQVLDLSLNSFEGIRIPEFIGSLVELKHLDLSYAGFHGRIPPNLGNLSKLEHLDVSSLVHTTSSYVAQIFNGAHTSLLSCDNLQWMTSLVSLKVIQMNGVNLSALGHEPMHVLSSLPSLEVLGLPWCSLSASKNITFSNFTSLQFLDLSSNYFASEFPRWVVNITSLQYSDLSHNSFSGEFMYGLSDLPSLQVMYMVHNLVKVNCTRLFAGKWSKIAYLDIDYTEFSGSIPSSIGNITSLKRLSVMSYERMRNGLDGNIPQQIGKLKKLEFLSLRY…	1286	9770	https://www.nature.com/articles/s41467-019-12607-6	http://cotton.hzau.edu.cn/EN/Download.htm
PlantKGA_88	Piperales	Piperaceae	Piper	nigrum	Piper nigrum	black pepper	胡椒	chromosome	Yes	基因	evmmodelPn19672	evmmodelPn196721288xxPlantKGA_88	evm.model.Pn19.672	L	partial	Pn5	32782589	32792358	-	Pfam	PF08263	Leucine rich repeat N-terminal domain	Leucine-rich repeat-containing N-terminal, plant-type	34	72	PSQEAALIKFKEGLIDPSNRLESWQLGSDCCSWRGITCD	1.6e-13	MAKLLLLYSYLGLFTLFSINQCVSLDSYHPHCLPSQEAALIKFKEGLIDPSNRLESWQLGSDCCSWRGITCDNQTGYVIAMDLHNPQNPYANLPFDEHHKGWLGSLDVSLGGKLGTSLMDLKKLQVLDLSLNSFEGIRIPEFIGSLVELKHLDLSYAGFHGRIPPNLGNLSKLEHLDVSSLVHTTSSYVAQIFNGAHTSLLSCDNLQWMTSLVSLKVIQMNGVNLSALGHEPMHVLSSLPSLEVLGLPWCSLSASKNITFSNFTSLQFLDLSSNYFASEFPRWVVNITSLQYSDLSHNSFSGEFMYGLSDLPSLQVMYMVHNLVKVNCTRLFAGKWSKIAYLDIDYTEFSGSIPSSIGNITSLKRLSVMSYERMRNGLDGNIPQQIGKLKKLEFLSLRY…	1286	9770	https://www.nature.com/articles/s41467-019-12607-6	http://cotton.hzau.edu.cn/EN/Download.htm
PlantKGA_88	Piperales	Piperaceae	Piper	nigrum	Piper nigrum	black pepper	胡椒	chromosome	Yes	基因	evmmodelPn19673	evmmodelPn196731288xxPlantKGA_88	evm.model.Pn19.673	L	partial	Pn5	32830595	32832172	-	Pfam	PF13855	Leucine rich repeat	Leucine-rich repeat	372	432	QLQILDLSHNSFQGIVHDTHFQNLNSLSSLELSHNAIVFKPHSTLSPPPNLLIVTLASCQI	1.9e-06	MDLKKLQVLDLSLNSFEGIRIPEFIGSLVELKHLDLSYAGFHGRIPPNLGNLSKLEHLDVSSLVHTNATTSSSVVQIVDGARCSSLSCDNLQWMTSLVSLKVIQMNGVNLSAVGLEPMHVFSSLPSLEKLGLSCSLSASNHITFSNFTSLQFLYLSSNYIASEFPRWVVNITSLQYLDLSQNLFRGEFMYGLSDLPSLQVMYMTQNLVKVNCTKLFAGKWSNIAYLDIDYTDLSGSIPSSIGNITSLERLNVMSYERMRNGLEGNIPEEIGKLEKLESLSLKYSKFVGKFPPKTINPHTLRYLQLDGVELQSSVNLHWFCQFKFLVALSLRNCQLTGPIPTCLAEIPFLRTLEHVRNHLNGTIPLDLGKHSQLQILDLSHNSFQGIVHDTHFQNLNSLS…	525	1578	https://www.nature.com/articles/s41467-019-12607-6	http://cotton.hzau.edu.cn/EN/Download.htm
PlantKGA_88	Piperales	Piperaceae	Piper	nigrum	Piper nigrum	black pepper	胡椒	chromosome	Yes	基因	evmmodelPn19674	evmmodelPn196741288xxPlantKGA_88	evm.model.Pn19.674	L	partial	Pn5	32832718	32832978	-	Pfam	PF08263	Leucine rich repeat N-terminal domain	Leucine-rich repeat-containing N-terminal, plant-type	34	72	PSQETALIKFKEGLINPSNRLNSWQLGSDCCSWRGITCD	4e-14	MAKLLLLYSYLGLFAFFSINQCVSLDYYHPHCLPSQETALIKFKEGLINPSNRLNSWQLGSDCCSWRGITCDNQTGYVIAMDLHML	86	261	https://www.nature.com/articles/s41467-019-12607-6	http://cotton.hzau.edu.cn/EN/Download.htm
PlantKGA_88	Piperales	Piperaceae	Piper	nigrum	Piper nigrum	black pepper	胡椒	chromosome	Yes	基因	evmmodelPn19679	evmmodelPn196791288xxPlantKGA_88	evm.model.Pn19.679	L	partial	Pn5	32899732	32902637	-	Pfam	PF08263	Leucine rich repeat N-terminal domain	Leucine-rich repeat-containing N-terminal, plant-type	34	72	PSQEAALIKFKEGLIDPSNRLESWQLGSDCCSWRGITCD	1.1e-13	MAKLLLLYSYLGLFTLFSINQCVSLDSYHPHCLPSQEAALIKFKEGLIDPSNRLESWQLGSDCCSWRGITCDNQTGYVIAMDLHNPQNPYANLPFDEHHKGWLGSLTIPEFIGSLVELKHLDLSYAGFHGRIPPNLGNLSKLEHLDVSSLVHTTSSYVAQIFNGAHTSLLSCDNLQWMTSLVSLKVIQMNAVNLSELGHEPMHVFSSFPSLEELGLSLCSLSASNHITFSNFTSLQFLDLSSNFFASEFPRWVVNMTSLQYLDLSYNFFIGEFMYGLSDLPSLQVMYMVHILVKVNCTRLFAGKWSKIAYLDIDYTDFSGSIPSSIGNITSLKRLSVMSFERMRNGLDGNIPQQIGKLKKLEFLSLRYNKFVGKFPPKIINPQSLRYLRLDGVELQSSV…	937	2906	https://www.nature.com/articles/s41467-019-12607-6	http://cotton.hzau.edu.cn/EN/Download.htm
PlantKGA_88	Piperales	Piperaceae	Piper	nigrum	Piper nigrum	black pepper	胡椒	chromosome	Yes	基因	evmmodelPn19679	evmmodelPn196791288xxPlantKGA_88	evm.model.Pn19.679	L	partial	Pn5	32899732	32902637	-	Pfam	PF13855	Leucine rich repeat	Leucine-rich repeat	632	682	ASNNEISGLIPVMFGNMDRLATLDLSTNKLTGTVPQNLVGSPHLRALDISG	2.6e-08	MAKLLLLYSYLGLFTLFSINQCVSLDSYHPHCLPSQEAALIKFKEGLIDPSNRLESWQLGSDCCSWRGITCDNQTGYVIAMDLHNPQNPYANLPFDEHHKGWLGSLTIPEFIGSLVELKHLDLSYAGFHGRIPPNLGNLSKLEHLDVSSLVHTTSSYVAQIFNGAHTSLLSCDNLQWMTSLVSLKVIQMNAVNLSELGHEPMHVFSSFPSLEELGLSLCSLSASNHITFSNFTSLQFLDLSSNFFASEFPRWVVNMTSLQYLDLSYNFFIGEFMYGLSDLPSLQVMYMVHILVKVNCTRLFAGKWSKIAYLDIDYTDFSGSIPSSIGNITSLKRLSVMSFERMRNGLDGNIPQQIGKLKKLEFLSLRYNKFVGKFPPKIINPQSLRYLRLDGVELQSSV…	937	2906	https://www.nature.com/articles/s41467-019-12607-6	http://cotton.hzau.edu.cn/EN/Download.htm
PlantKGA_88	Piperales	Piperaceae	Piper	nigrum	Piper nigrum	black pepper	胡椒	chromosome	Yes	基因	evmmodelPn19679	evmmodelPn196791288xxPlantKGA_88	evm.model.Pn19.679	L	partial	Pn5	32899732	32902637	-	Pfam	PF13855	Leucine rich repeat	Leucine-rich repeat	434	493	LSTLALARNHLKGTIPVELGKLSQLEILDLSHNSFQGIVHDTHFQNLNSLSVLELSHNAI	4.5e-08	MAKLLLLYSYLGLFTLFSINQCVSLDSYHPHCLPSQEAALIKFKEGLIDPSNRLESWQLGSDCCSWRGITCDNQTGYVIAMDLHNPQNPYANLPFDEHHKGWLGSLTIPEFIGSLVELKHLDLSYAGFHGRIPPNLGNLSKLEHLDVSSLVHTTSSYVAQIFNGAHTSLLSCDNLQWMTSLVSLKVIQMNAVNLSELGHEPMHVFSSFPSLEELGLSLCSLSASNHITFSNFTSLQFLDLSSNFFASEFPRWVVNMTSLQYLDLSYNFFIGEFMYGLSDLPSLQVMYMVHILVKVNCTRLFAGKWSKIAYLDIDYTDFSGSIPSSIGNITSLKRLSVMSFERMRNGLDGNIPQQIGKLKKLEFLSLRYNKFVGKFPPKIINPQSLRYLRLDGVELQSSV…	937	2906	https://www.nature.com/articles/s41467-019-12607-6	http://cotton.hzau.edu.cn/EN/Download.htm
PlantKGA_88	Piperales	Piperaceae	Piper	nigrum	Piper nigrum	black pepper	胡椒	chromosome	Yes	基因	evmmodelPn19680	evmmodelPn196801288xxPlantKGA_88	evm.model.Pn19.680	L	partial	Pn5	32905938	32909159	-	Pfam	PF08263	Leucine rich repeat N-terminal domain	Leucine-rich repeat-containing N-terminal, plant-type	34	72	PSQEAALIKFKEGLIDPSNRLESWQLGSDCCSWRGITCD	1.3e-13	MAKLLLLYSYLGLFTLFSINQCVSLDSYHPHCLPSQEAALIKFKEGLIDPSNRLESWQLGSDCCSWRGITCDNQTGYVIAMDLHNPQNPYANLPFDEHHKGWLGSLDVSLGGKLGTSLMDLKKLQVLDLSLNSFEGIRIPEFIGSLVELKHLDLSYAGFHGRIPPNLGNLSKLEHLDVSSLVHTTSSYVAQIFNGAHTSLLSCDNLQWMTSLVSLKVIQMNGVNLSALGHEPMHVLSSLPSLEVLGLPWCSLSASKNITFSNFTSLQFLDLSSNYFASEFPRWVVNIKSLQYLDLSHNSFSGEFMYGLSDLPSLQVMYMADNFVKVNCTKLFAGKWSNIAYLDIDFTDFSGSIPSSIGNITSLKSLDVVSYERMRNGLEGNIPEQIGKLEKLESLSLNY…	1073	3222	https://www.nature.com/articles/s41467-019-12607-6	http://cotton.hzau.edu.cn/EN/Download.htm
PlantKGA_88	Piperales	Piperaceae	Piper	nigrum	Piper nigrum	black pepper	胡椒	chromosome	Yes	基因	evmmodelPn19680	evmmodelPn196801288xxPlantKGA_88	evm.model.Pn19.680	L	partial	Pn5	32905938	32909159	-	Pfam	PF13855	Leucine rich repeat	Leucine-rich repeat	464	523	LHTLKLARNNLNGTIPVELGKLSQLEILDLSHNSFQGIVHDTHFQNLNSLSVLELSHNAI	7.6e-08	MAKLLLLYSYLGLFTLFSINQCVSLDSYHPHCLPSQEAALIKFKEGLIDPSNRLESWQLGSDCCSWRGITCDNQTGYVIAMDLHNPQNPYANLPFDEHHKGWLGSLDVSLGGKLGTSLMDLKKLQVLDLSLNSFEGIRIPEFIGSLVELKHLDLSYAGFHGRIPPNLGNLSKLEHLDVSSLVHTTSSYVAQIFNGAHTSLLSCDNLQWMTSLVSLKVIQMNGVNLSALGHEPMHVLSSLPSLEVLGLPWCSLSASKNITFSNFTSLQFLDLSSNYFASEFPRWVVNIKSLQYLDLSHNSFSGEFMYGLSDLPSLQVMYMADNFVKVNCTKLFAGKWSNIAYLDIDFTDFSGSIPSSIGNITSLKSLDVVSYERMRNGLEGNIPEQIGKLEKLESLSLNY…	1073	3222	https://www.nature.com/articles/s41467-019-12607-6	http://cotton.hzau.edu.cn/EN/Download.htm
PlantKGA_88	Piperales	Piperaceae	Piper	nigrum	Piper nigrum	black pepper	胡椒	chromosome	Yes	基因	evmmodelPn19680	evmmodelPn196801288xxPlantKGA_88	evm.model.Pn19.680	L	partial	Pn5	32905938	32909159	-	Pfam	PF13855	Leucine rich repeat	Leucine-rich repeat	662	715	ASNNEISGLVPVVFGNMDRLATLDLSTNKLNGTVPQNLVGSPRLRALDLSGNNL	8.8e-10	MAKLLLLYSYLGLFTLFSINQCVSLDSYHPHCLPSQEAALIKFKEGLIDPSNRLESWQLGSDCCSWRGITCDNQTGYVIAMDLHNPQNPYANLPFDEHHKGWLGSLDVSLGGKLGTSLMDLKKLQVLDLSLNSFEGIRIPEFIGSLVELKHLDLSYAGFHGRIPPNLGNLSKLEHLDVSSLVHTTSSYVAQIFNGAHTSLLSCDNLQWMTSLVSLKVIQMNGVNLSALGHEPMHVLSSLPSLEVLGLPWCSLSASKNITFSNFTSLQFLDLSSNYFASEFPRWVVNIKSLQYLDLSHNSFSGEFMYGLSDLPSLQVMYMADNFVKVNCTKLFAGKWSNIAYLDIDFTDFSGSIPSSIGNITSLKSLDVVSYERMRNGLEGNIPEQIGKLEKLESLSLNY…	1073	3222	https://www.nature.com/articles/s41467-019-12607-6	http://cotton.hzau.edu.cn/EN/Download.htm
PlantKGA_88	Piperales	Piperaceae	Piper	nigrum	Piper nigrum	black pepper	胡椒	chromosome	Yes	基因	evmmodelPn19680	evmmodelPn196801288xxPlantKGA_88	evm.model.Pn19.680	L	partial	Pn5	32905938	32909159	-	Pfam	PF13855	Leucine rich repeat	Leucine-rich repeat	535	596	PNLYIVGLSSCQIGPFFPSWVKELEHVSILDLSRNEVKGSLPQWFWEIVPVLIHLNLSHNRI	1.8e-06	MAKLLLLYSYLGLFTLFSINQCVSLDSYHPHCLPSQEAALIKFKEGLIDPSNRLESWQLGSDCCSWRGITCDNQTGYVIAMDLHNPQNPYANLPFDEHHKGWLGSLDVSLGGKLGTSLMDLKKLQVLDLSLNSFEGIRIPEFIGSLVELKHLDLSYAGFHGRIPPNLGNLSKLEHLDVSSLVHTTSSYVAQIFNGAHTSLLSCDNLQWMTSLVSLKVIQMNGVNLSALGHEPMHVLSSLPSLEVLGLPWCSLSASKNITFSNFTSLQFLDLSSNYFASEFPRWVVNIKSLQYLDLSHNSFSGEFMYGLSDLPSLQVMYMADNFVKVNCTKLFAGKWSNIAYLDIDFTDFSGSIPSSIGNITSLKSLDVVSYERMRNGLEGNIPEQIGKLEKLESLSLNY…	1073	3222	https://www.nature.com/articles/s41467-019-12607-6	http://cotton.hzau.edu.cn/EN/Download.htm
PlantKGA_88	Piperales	Piperaceae	Piper	nigrum	Piper nigrum	black pepper	胡椒	chromosome	Yes	基因	evmmodelPn19680	evmmodelPn196801288xxPlantKGA_88	evm.model.Pn19.680	L	partial	Pn5	32905938	32909159	-	Pfam	PF13855	Leucine rich repeat	Leucine-rich repeat	240	299	PSLEVLGLPWCSLSASKNITFSNFTSLQFLDLSSNYFASEFPRWVVNIKSLQYLDLSHNS	1.8e-07	MAKLLLLYSYLGLFTLFSINQCVSLDSYHPHCLPSQEAALIKFKEGLIDPSNRLESWQLGSDCCSWRGITCDNQTGYVIAMDLHNPQNPYANLPFDEHHKGWLGSLDVSLGGKLGTSLMDLKKLQVLDLSLNSFEGIRIPEFIGSLVELKHLDLSYAGFHGRIPPNLGNLSKLEHLDVSSLVHTTSSYVAQIFNGAHTSLLSCDNLQWMTSLVSLKVIQMNGVNLSALGHEPMHVLSSLPSLEVLGLPWCSLSASKNITFSNFTSLQFLDLSSNYFASEFPRWVVNIKSLQYLDLSHNSFSGEFMYGLSDLPSLQVMYMADNFVKVNCTKLFAGKWSNIAYLDIDFTDFSGSIPSSIGNITSLKSLDVVSYERMRNGLEGNIPEQIGKLEKLESLSLNY…	1073	3222	https://www.nature.com/articles/s41467-019-12607-6	http://cotton.hzau.edu.cn/EN/Download.htm
PlantKGA_88	Piperales	Piperaceae	Piper	nigrum	Piper nigrum	black pepper	胡椒	chromosome	Yes	基因	evmmodelPn19680	evmmodelPn196801288xxPlantKGA_88	evm.model.Pn19.680	L	partial	Pn5	32905938	32909159	-	Pfam	PF13855	Leucine rich repeat	Leucine-rich repeat	728	787	ALRSLHLAENALSGEFPAWLENCTHLEVLVLSQNKFSGKIPQWIGESSASLKILDLRSNM	2e-06	MAKLLLLYSYLGLFTLFSINQCVSLDSYHPHCLPSQEAALIKFKEGLIDPSNRLESWQLGSDCCSWRGITCDNQTGYVIAMDLHNPQNPYANLPFDEHHKGWLGSLDVSLGGKLGTSLMDLKKLQVLDLSLNSFEGIRIPEFIGSLVELKHLDLSYAGFHGRIPPNLGNLSKLEHLDVSSLVHTTSSYVAQIFNGAHTSLLSCDNLQWMTSLVSLKVIQMNGVNLSALGHEPMHVLSSLPSLEVLGLPWCSLSASKNITFSNFTSLQFLDLSSNYFASEFPRWVVNIKSLQYLDLSHNSFSGEFMYGLSDLPSLQVMYMADNFVKVNCTKLFAGKWSNIAYLDIDFTDFSGSIPSSIGNITSLKSLDVVSYERMRNGLEGNIPEQIGKLEKLESLSLNY…	1073	3222	https://www.nature.com/articles/s41467-019-12607-6	http://cotton.hzau.edu.cn/EN/Download.htm
PlantKGA_88	Piperales	Piperaceae	Piper	nigrum	Piper nigrum	black pepper	胡椒	chromosome	Yes	基因	evmmodelPn19681	evmmodelPn196811288xxPlantKGA_88	evm.model.Pn19.681	L	partial	Pn5	32916240	32918340	-	Pfam	PF08263	Leucine rich repeat N-terminal domain	Leucine-rich repeat-containing N-terminal, plant-type	34	72	PSQETALIKFKEGLIDPSNRLESWQLGSDCCSWRGITCD	8.1e-14	MAKLLLLYSYLGFFTLFSINQCLCLDYYYPHCLPSQETALIKFKEGLIDPSNRLESWQLGSDCCSWRGITCDNQTGYVIAMDLHNPQNPYANLPFDEHHKGWLGSLDVSLGGKLGTSLMDLKKLQVLDLSLNSFEGIRIPEFIDLSRNEVKGSLPQWFWEIVPVLIHLNLSHNSILGHLPNPFMLFQSDSGLLDLSFNEFSGPVPCFSDGIVHVDVSNNKITGQLPENIHISTKSFKTFLASNNEISGLVPVVFGNMDRLETLDLSTNKLNGTVPQNLVGSPRLRALDLSGNNLSGEMHWNLPKGSALRSLHLAENALSGEFPAWLENSDNYLNGSIPKSFGNFKAMKEKHAFAEWFPMNDGYYKHKLTMTVSGKEDEYSTILFLVNCMDLSNNNFSGE…	570	2101	https://www.nature.com/articles/s41467-019-12607-6	http://cotton.hzau.edu.cn/EN/Download.htm
PlantKGA_88	Piperales	Piperaceae	Piper	nigrum	Piper nigrum	black pepper	胡椒	chromosome	Yes	基因	evmmodelPn19681	evmmodelPn196811288xxPlantKGA_88	evm.model.Pn19.681	L	partial	Pn5	32916240	32918340	-	Pfam	PF13855	Leucine rich repeat	Leucine-rich repeat	241	294	ASNNEISGLVPVVFGNMDRLETLDLSTNKLNGTVPQNLVGSPRLRALDLSGNNL	1.1e-10	MAKLLLLYSYLGFFTLFSINQCLCLDYYYPHCLPSQETALIKFKEGLIDPSNRLESWQLGSDCCSWRGITCDNQTGYVIAMDLHNPQNPYANLPFDEHHKGWLGSLDVSLGGKLGTSLMDLKKLQVLDLSLNSFEGIRIPEFIDLSRNEVKGSLPQWFWEIVPVLIHLNLSHNSILGHLPNPFMLFQSDSGLLDLSFNEFSGPVPCFSDGIVHVDVSNNKITGQLPENIHISTKSFKTFLASNNEISGLVPVVFGNMDRLETLDLSTNKLNGTVPQNLVGSPRLRALDLSGNNLSGEMHWNLPKGSALRSLHLAENALSGEFPAWLENSDNYLNGSIPKSFGNFKAMKEKHAFAEWFPMNDGYYKHKLTMTVSGKEDEYSTILFLVNCMDLSNNNFSGE…	570	2101	https://www.nature.com/articles/s41467-019-12607-6	http://cotton.hzau.edu.cn/EN/Download.htm
PlantKGA_88	Piperales	Piperaceae	Piper	nigrum	Piper nigrum	black pepper	胡椒	chromosome	Yes	基因	evmmodelPn19681	evmmodelPn196811288xxPlantKGA_88	evm.model.Pn19.681	L	partial	Pn5	32916240	32918340	-	Pfam	PF00560	Leucine Rich Repeat	Leucine-rich repeat	165	183	LIHLNLSHNSILGHLPNPF	1.4	MAKLLLLYSYLGFFTLFSINQCLCLDYYYPHCLPSQETALIKFKEGLIDPSNRLESWQLGSDCCSWRGITCDNQTGYVIAMDLHNPQNPYANLPFDEHHKGWLGSLDVSLGGKLGTSLMDLKKLQVLDLSLNSFEGIRIPEFIDLSRNEVKGSLPQWFWEIVPVLIHLNLSHNSILGHLPNPFMLFQSDSGLLDLSFNEFSGPVPCFSDGIVHVDVSNNKITGQLPENIHISTKSFKTFLASNNEISGLVPVVFGNMDRLETLDLSTNKLNGTVPQNLVGSPRLRALDLSGNNLSGEMHWNLPKGSALRSLHLAENALSGEFPAWLENSDNYLNGSIPKSFGNFKAMKEKHAFAEWFPMNDGYYKHKLTMTVSGKEDEYSTILFLVNCMDLSNNNFSGE…	570	2101	https://www.nature.com/articles/s41467-019-12607-6	http://cotton.hzau.edu.cn/EN/Download.htm
PlantKGA_88	Piperales	Piperaceae	Piper	nigrum	Piper nigrum	black pepper	胡椒	chromosome	Yes	基因	evmmodelPn19683	evmmodelPn196831288xxPlantKGA_88	evm.model.Pn19.683	L	partial	Pn5	32954533	32963011	-	Pfam	PF13855	Leucine rich repeat	Leucine-rich repeat	256	309	ASNNEISGLIPLVFGNMDRLATLDLSSNKLNGTGPQKLIGSPHLRALDLSGNNL	4.5e-10	MDLHNPQNPYACLPFDEHHKGWLASPGGKLGTSLTDLKKLQFLDLRLNSFEGIRIRELIGSLVELKHLDLSYARFHGRIPPNLGNLSKLEHLDVSSLVHTNANIRSYIAQFISGARTSSLSCDNLQWMTSLVSLKVVQMNEVNLSALDHEPMHVFSSLPSLEKLGLSLCSLSASNNITFSNFTPLQFLDLSSSYIDRKARETGVQGFLDLSFNEFSGPAPCFSDGIVYVDVSYNQITRQLPDNIHSSTKSFKTFLASNNEISGLIPLVFGNMDRLATLDLSSNKLNGTGPQKLIGSPHLRALDLSGNNLSGEIHWNLPKGNALRSLYLAENAISREFPAWLENCAHLEVLVLSQNKFSGKIPQWISESSPSHKILDLRFNRFTGQIPWQLCYLSSLQVL…	746	8479	https://www.nature.com/articles/s41467-019-12607-6	http://cotton.hzau.edu.cn/EN/Download.htm
PlantKGA_88	Piperales	Piperaceae	Piper	nigrum	Piper nigrum	black pepper	胡椒	chromosome	Yes	基因	evmmodelPn19692	evmmodelPn196921288xxPlantKGA_88	evm.model.Pn19.692	L	partial	Pn5	33056976	33060206	-	Pfam	PF00560	Leucine Rich Repeat	Leucine-rich repeat	804	826	SLQVLNIAGNYLNGSIPKSFGNF	1.4	MAKLLLLYSYLGLFTLFSINQCVSLDSYHPHCLPSQEAALIKFKEDLIDPSNRLESWQLGSDCCSWRGITCDNQTGYVIAMDLHNPQNPYANLPFDEHHKGWLGSLDVSLGGKLGTSLMDLKKLQVLDLSLNSFEGIRIPEFIGSLVELKHLDLSYAGFHGRIPPNLGNLSKLEHLDVSSLVHTNATTSSSVVQIVNVARTSSLSCDNLQWMTSLVSLKVIQMNGVNLLALAPEPMHVFSSLPSLEKLGLSLCSLSASNNITFSNFTSLQFLDLSSNYIASEFPRWVVNITSLQYLDLSWNSFRGEFMYGLSDLPSLQVMSVAENLVKVNCTKLFAGKWSYIAYLDIYNTDFSGSIPSSIGNITSLECLNLVSNPKKRNGLEGNIPQEIGKLKKLEFLS…	1076	3231	https://www.nature.com/articles/s41467-019-12607-6	http://cotton.hzau.edu.cn/EN/Download.htm
PlantKGA_88	Piperales	Piperaceae	Piper	nigrum	Piper nigrum	black pepper	胡椒	chromosome	Yes	基因	evmmodelPn19692	evmmodelPn196921288xxPlantKGA_88	evm.model.Pn19.692	L	partial	Pn5	33056976	33060206	-	Pfam	PF13855	Leucine rich repeat	Leucine-rich repeat	243	302	PSLEKLGLSLCSLSASNNITFSNFTSLQFLDLSSNYIASEFPRWVVNITSLQYLDLSWNS	2.2e-08	MAKLLLLYSYLGLFTLFSINQCVSLDSYHPHCLPSQEAALIKFKEDLIDPSNRLESWQLGSDCCSWRGITCDNQTGYVIAMDLHNPQNPYANLPFDEHHKGWLGSLDVSLGGKLGTSLMDLKKLQVLDLSLNSFEGIRIPEFIGSLVELKHLDLSYAGFHGRIPPNLGNLSKLEHLDVSSLVHTNATTSSSVVQIVNVARTSSLSCDNLQWMTSLVSLKVIQMNGVNLLALAPEPMHVFSSLPSLEKLGLSLCSLSASNNITFSNFTSLQFLDLSSNYIASEFPRWVVNITSLQYLDLSWNSFRGEFMYGLSDLPSLQVMSVAENLVKVNCTKLFAGKWSYIAYLDIYNTDFSGSIPSSIGNITSLECLNLVSNPKKRNGLEGNIPQEIGKLKKLEFLS…	1076	3231	https://www.nature.com/articles/s41467-019-12607-6	http://cotton.hzau.edu.cn/EN/Download.htm
PlantKGA_88	Piperales	Piperaceae	Piper	nigrum	Piper nigrum	black pepper	胡椒	chromosome	Yes	基因	evmmodelPn19692	evmmodelPn196921288xxPlantKGA_88	evm.model.Pn19.692	L	partial	Pn5	33056976	33060206	-	Pfam	PF13855	Leucine rich repeat	Leucine-rich repeat	468	527	LTTLSLDRNHLNGTIPVELGKLSQLEILDLSHNSFRGIVHDTHFQNLNSLHVLNLNHNAI	1.4e-07	MAKLLLLYSYLGLFTLFSINQCVSLDSYHPHCLPSQEAALIKFKEDLIDPSNRLESWQLGSDCCSWRGITCDNQTGYVIAMDLHNPQNPYANLPFDEHHKGWLGSLDVSLGGKLGTSLMDLKKLQVLDLSLNSFEGIRIPEFIGSLVELKHLDLSYAGFHGRIPPNLGNLSKLEHLDVSSLVHTNATTSSSVVQIVNVARTSSLSCDNLQWMTSLVSLKVIQMNGVNLLALAPEPMHVFSSLPSLEKLGLSLCSLSASNNITFSNFTSLQFLDLSSNYIASEFPRWVVNITSLQYLDLSWNSFRGEFMYGLSDLPSLQVMSVAENLVKVNCTKLFAGKWSYIAYLDIYNTDFSGSIPSSIGNITSLECLNLVSNPKKRNGLEGNIPQEIGKLKKLEFLS…	1076	3231	https://www.nature.com/articles/s41467-019-12607-6	http://cotton.hzau.edu.cn/EN/Download.htm
PlantKGA_88	Piperales	Piperaceae	Piper	nigrum	Piper nigrum	black pepper	胡椒	chromosome	Yes	基因	evmmodelPn19692	evmmodelPn196921288xxPlantKGA_88	evm.model.Pn19.692	L	partial	Pn5	33056976	33060206	-	Pfam	PF13855	Leucine rich repeat	Leucine-rich repeat	665	718	LTSNNDISGLIPVVFGNMDRLETLDLSGNKLHGTVPHLVGSPHLRALDLSGNNL	7.1e-09	MAKLLLLYSYLGLFTLFSINQCVSLDSYHPHCLPSQEAALIKFKEDLIDPSNRLESWQLGSDCCSWRGITCDNQTGYVIAMDLHNPQNPYANLPFDEHHKGWLGSLDVSLGGKLGTSLMDLKKLQVLDLSLNSFEGIRIPEFIGSLVELKHLDLSYAGFHGRIPPNLGNLSKLEHLDVSSLVHTNATTSSSVVQIVNVARTSSLSCDNLQWMTSLVSLKVIQMNGVNLLALAPEPMHVFSSLPSLEKLGLSLCSLSASNNITFSNFTSLQFLDLSSNYIASEFPRWVVNITSLQYLDLSWNSFRGEFMYGLSDLPSLQVMSVAENLVKVNCTKLFAGKWSYIAYLDIYNTDFSGSIPSSIGNITSLECLNLVSNPKKRNGLEGNIPQEIGKLKKLEFLS…	1076	3231	https://www.nature.com/articles/s41467-019-12607-6	http://cotton.hzau.edu.cn/EN/Download.htm
PlantKGA_88	Piperales	Piperaceae	Piper	nigrum	Piper nigrum	black pepper	胡椒	chromosome	Yes	基因	evmmodelPn19692	evmmodelPn196921288xxPlantKGA_88	evm.model.Pn19.692	L	partial	Pn5	33056976	33060206	-	Pfam	PF08263	Leucine rich repeat N-terminal domain	Leucine-rich repeat-containing N-terminal, plant-type	34	72	PSQEAALIKFKEDLIDPSNRLESWQLGSDCCSWRGITCD	4.5e-13	MAKLLLLYSYLGLFTLFSINQCVSLDSYHPHCLPSQEAALIKFKEDLIDPSNRLESWQLGSDCCSWRGITCDNQTGYVIAMDLHNPQNPYANLPFDEHHKGWLGSLDVSLGGKLGTSLMDLKKLQVLDLSLNSFEGIRIPEFIGSLVELKHLDLSYAGFHGRIPPNLGNLSKLEHLDVSSLVHTNATTSSSVVQIVNVARTSSLSCDNLQWMTSLVSLKVIQMNGVNLLALAPEPMHVFSSLPSLEKLGLSLCSLSASNNITFSNFTSLQFLDLSSNYIASEFPRWVVNITSLQYLDLSWNSFRGEFMYGLSDLPSLQVMSVAENLVKVNCTKLFAGKWSYIAYLDIYNTDFSGSIPSSIGNITSLECLNLVSNPKKRNGLEGNIPQEIGKLKKLEFLS…	1076	3231	https://www.nature.com/articles/s41467-019-12607-6	http://cotton.hzau.edu.cn/EN/Download.htm
PlantKGA_88	Piperales	Piperaceae	Piper	nigrum	Piper nigrum	black pepper	胡椒	chromosome	Yes	基因	evmmodelPn19694	evmmodelPn196941288xxPlantKGA_88	evm.model.Pn19.694	L	partial	Pn5	33102058	33106687	-	Pfam	PF13855	Leucine rich repeat	Leucine-rich repeat	821	880	PSLEKLGLSLCSLSASNNITFSNFTSLQFLDLSSNYIASEYPSWIVNITSLLYLDLSHNS	3.8e-07	MAKLLLLYSYLGLFALFSINQCVSLGYYHPHCLPSQETALIKFKEGLIDPSNRLKSWQLGSDCCSWRGITCDNQTGYVIAMDLHNPQNAYANLPFDEHHKGWLASPDVSVGGKLGTSLMDLKKLQFLDLRLNSFEVIRIPEFIGSLVELKHLDLSYAGFHGRIPPNLGNLSKLEHLDVSSLAHTNATTSSSVVQIVDGARSSSLSCDNLQWMTSLVSLKVIQMNGVNLSALGLEPMHVFSSLPSLEKLGLSFCSLFASNHITFSNFTSLKFLYLSSNYIASEFPRWVVNITSLQYLDLSQNLFRGPIPTCLAEMPFLGLLQLARNHLNGAIPVELNKLSQLEFLDLSHNSFQGVVHGTHFQNLNRLSVLDLSYNGIVFKPHSTWSPPPNLLIVALSSCQ…	1009	4630	https://www.nature.com/articles/s41467-019-12607-6	http://cotton.hzau.edu.cn/EN/Download.htm
PlantKGA_88	Piperales	Piperaceae	Piper	nigrum	Piper nigrum	black pepper	胡椒	chromosome	Yes	基因	evmmodelPn19694	evmmodelPn196941288xxPlantKGA_88	evm.model.Pn19.694	L	partial	Pn5	33102058	33106687	-	Pfam	PF13855	Leucine rich repeat	Leucine-rich repeat	243	302	PSLEKLGLSFCSLFASNHITFSNFTSLKFLYLSSNYIASEFPRWVVNITSLQYLDLSQNL	5.5e-09	MAKLLLLYSYLGLFALFSINQCVSLGYYHPHCLPSQETALIKFKEGLIDPSNRLKSWQLGSDCCSWRGITCDNQTGYVIAMDLHNPQNAYANLPFDEHHKGWLASPDVSVGGKLGTSLMDLKKLQFLDLRLNSFEVIRIPEFIGSLVELKHLDLSYAGFHGRIPPNLGNLSKLEHLDVSSLAHTNATTSSSVVQIVDGARSSSLSCDNLQWMTSLVSLKVIQMNGVNLSALGLEPMHVFSSLPSLEKLGLSFCSLFASNHITFSNFTSLKFLYLSSNYIASEFPRWVVNITSLQYLDLSQNLFRGPIPTCLAEMPFLGLLQLARNHLNGAIPVELNKLSQLEFLDLSHNSFQGVVHGTHFQNLNRLSVLDLSYNGIVFKPHSTWSPPPNLLIVALSSCQ…	1009	4630	https://www.nature.com/articles/s41467-019-12607-6	http://cotton.hzau.edu.cn/EN/Download.htm
PlantKGA_88	Piperales	Piperaceae	Piper	nigrum	Piper nigrum	black pepper	胡椒	chromosome	Yes	基因	evmmodelPn19694	evmmodelPn196941288xxPlantKGA_88	evm.model.Pn19.694	L	partial	Pn5	33102058	33106687	-	Pfam	PF13855	Leucine rich repeat	Leucine-rich repeat	514	567	LASNNDISDLIPVVFGNMDRLETLDLSGNKLHGTVPHLVGSPHLRALDLSGNNL	6.8e-09	MAKLLLLYSYLGLFALFSINQCVSLGYYHPHCLPSQETALIKFKEGLIDPSNRLKSWQLGSDCCSWRGITCDNQTGYVIAMDLHNPQNAYANLPFDEHHKGWLASPDVSVGGKLGTSLMDLKKLQFLDLRLNSFEVIRIPEFIGSLVELKHLDLSYAGFHGRIPPNLGNLSKLEHLDVSSLAHTNATTSSSVVQIVDGARSSSLSCDNLQWMTSLVSLKVIQMNGVNLSALGLEPMHVFSSLPSLEKLGLSFCSLFASNHITFSNFTSLKFLYLSSNYIASEFPRWVVNITSLQYLDLSQNLFRGPIPTCLAEMPFLGLLQLARNHLNGAIPVELNKLSQLEFLDLSHNSFQGVVHGTHFQNLNRLSVLDLSYNGIVFKPHSTWSPPPNLLIVALSSCQ…	1009	4630	https://www.nature.com/articles/s41467-019-12607-6	http://cotton.hzau.edu.cn/EN/Download.htm
PlantKGA_88	Piperales	Piperaceae	Piper	nigrum	Piper nigrum	black pepper	胡椒	chromosome	Yes	基因	evmmodelPn19694	evmmodelPn196941288xxPlantKGA_88	evm.model.Pn19.694	L	partial	Pn5	33102058	33106687	-	Pfam	PF13855	Leucine rich repeat	Leucine-rich repeat	720	775	MDLSNNNFSGEIPQELTKLSELLVLNLSHNQLGEHIPGQIGEMKQLFTLDFSHNHL	1.8e-06	MAKLLLLYSYLGLFALFSINQCVSLGYYHPHCLPSQETALIKFKEGLIDPSNRLKSWQLGSDCCSWRGITCDNQTGYVIAMDLHNPQNAYANLPFDEHHKGWLASPDVSVGGKLGTSLMDLKKLQFLDLRLNSFEVIRIPEFIGSLVELKHLDLSYAGFHGRIPPNLGNLSKLEHLDVSSLAHTNATTSSSVVQIVDGARSSSLSCDNLQWMTSLVSLKVIQMNGVNLSALGLEPMHVFSSLPSLEKLGLSFCSLFASNHITFSNFTSLKFLYLSSNYIASEFPRWVVNITSLQYLDLSQNLFRGPIPTCLAEMPFLGLLQLARNHLNGAIPVELNKLSQLEFLDLSHNSFQGVVHGTHFQNLNRLSVLDLSYNGIVFKPHSTWSPPPNLLIVALSSCQ…	1009	4630	https://www.nature.com/articles/s41467-019-12607-6	http://cotton.hzau.edu.cn/EN/Download.htm
PlantKGA_88	Piperales	Piperaceae	Piper	nigrum	Piper nigrum	black pepper	胡椒	chromosome	Yes	基因	evmmodelPn19694	evmmodelPn196941288xxPlantKGA_88	evm.model.Pn19.694	L	partial	Pn5	33102058	33106687	-	Pfam	PF08263	Leucine rich repeat N-terminal domain	Leucine-rich repeat-containing N-terminal, plant-type	34	72	PSQETALIKFKEGLIDPSNRLKSWQLGSDCCSWRGITCD	2.1e-13	MAKLLLLYSYLGLFALFSINQCVSLGYYHPHCLPSQETALIKFKEGLIDPSNRLKSWQLGSDCCSWRGITCDNQTGYVIAMDLHNPQNAYANLPFDEHHKGWLASPDVSVGGKLGTSLMDLKKLQFLDLRLNSFEVIRIPEFIGSLVELKHLDLSYAGFHGRIPPNLGNLSKLEHLDVSSLAHTNATTSSSVVQIVDGARSSSLSCDNLQWMTSLVSLKVIQMNGVNLSALGLEPMHVFSSLPSLEKLGLSFCSLFASNHITFSNFTSLKFLYLSSNYIASEFPRWVVNITSLQYLDLSQNLFRGPIPTCLAEMPFLGLLQLARNHLNGAIPVELNKLSQLEFLDLSHNSFQGVVHGTHFQNLNRLSVLDLSYNGIVFKPHSTWSPPPNLLIVALSSCQ…	1009	4630	https://www.nature.com/articles/s41467-019-12607-6	http://cotton.hzau.edu.cn/EN/Download.htm
PlantKGA_88	Piperales	Piperaceae	Piper	nigrum	Piper nigrum	black pepper	胡椒	chromosome	Yes	基因	evmmodelPn19696	evmmodelPn196961288xxPlantKGA_88	evm.model.Pn19.696	L	partial	Pn5	33120518	33124009	-	Pfam	PF08263	Leucine rich repeat N-terminal domain	Leucine-rich repeat-containing N-terminal, plant-type	34	72	PSQETALIKFKEGLIDPSNRLESWQLGSDCCSWRGITCD	9.6e-14	MAKLLLLDSYLGFFTLFSINQCLCLDYYHPHCLPSQETALIKFKEGLIDPSNRLESWQLGSDCCSWRGITCDNQTGYVIAMDLHNPQNPYANLPFDEHHEGWLASLDNPGIHRFVGRVEAFGLSYAGFHGRIPPNFGNLSKLEHLDVSSLVHTNATTSSQIVNGGRSSSLSCDNLQWMTSLVSMKFIQMNAVNLSELGHEPMHVFSSLPSLQKLGEFMYGLSDLPSLQVIYMVHLYGSQFAGKWSKIAYLDIDYTDFSGSIPSSIGNITSLKRLSVMSYERMRNGLDGNIPQQIGKLKKLEFLSLRYNKFVGKFPPKIINPQFLRYLQLDGVELQSSVNLHWFCQFKFLMALWLSNCHLTGPIPTCLAEMPFLTILALDRNHLNGTIPVELGKHSQLDI…	655	3492	https://www.nature.com/articles/s41467-019-12607-6	http://cotton.hzau.edu.cn/EN/Download.htm
PlantKGA_88	Piperales	Piperaceae	Piper	nigrum	Piper nigrum	black pepper	胡椒	chromosome	Yes	基因	evmmodelPn19696	evmmodelPn196961288xxPlantKGA_88	evm.model.Pn19.696	L	partial	Pn5	33120518	33124009	-	Pfam	PF00560	Leucine Rich Repeat	Leucine-rich repeat	466	488	SLQVLNVAGNYLNGSIPKSFGNF	2	MAKLLLLDSYLGFFTLFSINQCLCLDYYHPHCLPSQETALIKFKEGLIDPSNRLESWQLGSDCCSWRGITCDNQTGYVIAMDLHNPQNPYANLPFDEHHEGWLASLDNPGIHRFVGRVEAFGLSYAGFHGRIPPNFGNLSKLEHLDVSSLVHTNATTSSQIVNGGRSSSLSCDNLQWMTSLVSMKFIQMNAVNLSELGHEPMHVFSSLPSLQKLGEFMYGLSDLPSLQVIYMVHLYGSQFAGKWSKIAYLDIDYTDFSGSIPSSIGNITSLKRLSVMSYERMRNGLDGNIPQQIGKLKKLEFLSLRYNKFVGKFPPKIINPQFLRYLQLDGVELQSSVNLHWFCQFKFLMALWLSNCHLTGPIPTCLAEMPFLTILALDRNHLNGTIPVELGKHSQLDI…	655	3492	https://www.nature.com/articles/s41467-019-12607-6	http://cotton.hzau.edu.cn/EN/Download.htm
PlantKGA_88	Piperales	Piperaceae	Piper	nigrum	Piper nigrum	black pepper	胡椒	chromosome	Yes	基因	evmmodelPn19699	evmmodelPn196991288xxPlantKGA_88	evm.model.Pn19.699	L	partial	Pn5	33165149	33165900	-	Pfam	PF08263	Leucine rich repeat N-terminal domain	Leucine-rich repeat-containing N-terminal, plant-type	34	72	PSQETALIKFKEGLIDPSNRLESWQLGSDCCSWRGITCD	2.1e-14	MAKLLLLDSYLGFFTLFSINQCLCLDYYHPHCLPSQETALIKFKEGLIDPSNRLESWQLGSDCCSWRGITCDNQTGYVIAMDLHNPQNPYANLPFDEHHEGWLASLDNPGIHRFVGRVEAFGLSYAGFHGRIPPNFGNLSKLEHLDVSSLVHTNATTSSQIVNGGRSSSLSCDNLQWMTSLVSMKFIQMNAVNLSELGHEPMHVFSSLPSLQKLGLSLC	219	752	https://www.nature.com/articles/s41467-019-12607-6	http://cotton.hzau.edu.cn/EN/Download.htm
PlantKGA_88	Piperales	Piperaceae	Piper	nigrum	Piper nigrum	black pepper	胡椒	chromosome	Yes	基因	evmmodelPn19703	evmmodelPn197031288xxPlantKGA_88	evm.model.Pn19.703	L	partial	Pn5	33275922	33276734	-	Pfam	PF08263	Leucine rich repeat N-terminal domain	Leucine-rich repeat-containing N-terminal, plant-type	19	57	PSQEAALIKFKEGLIDSSNRLKSWQLGSDCCSWRGITCD	9.3e-14	MFSINQCVSLDYYHPHCLPSQEAALIKFKEGLIDSSNRLKSWQLGSDCCSWRGITCDNQTGYVIAMDLHNPQNPDANLPFDEHHKGWLGSLDVSLGGKLGTSLMDLEKLQVVDLSLNSFEGIRIPEVIGSLVELKHLDLSYAGFHGRIPPNLGNLSKLEHLDVSSLVHTNATTRYNIVQNINAACTSSLSCDNLQWMTSLASLKVIQMNGVNLSALGHEPMHVLSSLPSIEELGLSMSSLSAASNITFSNFTSLQFLDLSSNYIASEIPR	270	813	https://www.nature.com/articles/s41467-019-12607-6	http://cotton.hzau.edu.cn/EN/Download.htm
PlantKGA_88	Piperales	Piperaceae	Piper	nigrum	Piper nigrum	black pepper	胡椒	chromosome	Yes	基因	evmmodelPn19711	evmmodelPn197111288xxPlantKGA_88	evm.model.Pn19.711	L	partial	Pn5	33362368	33374475	-	Pfam	PF13855	Leucine rich repeat	Leucine-rich repeat	468	527	LTILALDRNHLNGTIPVELGKLSQLDILDLSHNSFQGFVHDTHFQNLNRLSVLYLSHNAI	7.8e-08	MAKLLLLYSYLGLFTLFSINQCVSLDSYHPHCLPSQEAALIKFKEGLIDPSNRLESWQHGSDCCSWRGISCDKQTGYVIAMDLHNPQNPYANLPFDEHHKGWLASLDVSLGGKLGTSLMDLKKLQFLDLRLNSFEGIRIPEFIGSLVELKHLDLSYAGFHGRIPPNFGNLSKLEHLDVSSLVHTNATTSSSVVKIVNGARSSSLSCDNLQWMTSLVSLKVIQMNAVNLSELGHEPMHVFSSLPSLEKLGLSLCSLSASNHITFSNFTSLQFLDLSSNFFASEFPRWVVNITSMQYLDLSDNFFIGEFMYGLSDLPSLQVMYMVHNLVKVNCTRLFAGKWSKIAYLDIDYTDFSGSIPSSIGNITSLKRLSVMSFETMRNGLDGDIPQQIGKLKKLEFLS…	1257	12108	https://www.nature.com/articles/s41467-019-12607-6	http://cotton.hzau.edu.cn/EN/Download.htm
PlantKGA_88	Piperales	Piperaceae	Piper	nigrum	Piper nigrum	black pepper	胡椒	chromosome	Yes	基因	evmmodelPn19711	evmmodelPn197111288xxPlantKGA_88	evm.model.Pn19.711	L	partial	Pn5	33362368	33374475	-	Pfam	PF13855	Leucine rich repeat	Leucine-rich repeat	540	600	NLLIVALASCQIGPIFPSWLKQLEHVFYLDLSRNEVKGSLPQWFWEIEPVLIHLNLSHNRI	1.3e-06	MAKLLLLYSYLGLFTLFSINQCVSLDSYHPHCLPSQEAALIKFKEGLIDPSNRLESWQHGSDCCSWRGISCDKQTGYVIAMDLHNPQNPYANLPFDEHHKGWLASLDVSLGGKLGTSLMDLKKLQFLDLRLNSFEGIRIPEFIGSLVELKHLDLSYAGFHGRIPPNFGNLSKLEHLDVSSLVHTNATTSSSVVKIVNGARSSSLSCDNLQWMTSLVSLKVIQMNAVNLSELGHEPMHVFSSLPSLEKLGLSLCSLSASNHITFSNFTSLQFLDLSSNFFASEFPRWVVNITSMQYLDLSDNFFIGEFMYGLSDLPSLQVMYMVHNLVKVNCTRLFAGKWSKIAYLDIDYTDFSGSIPSSIGNITSLKRLSVMSFETMRNGLDGDIPQQIGKLKKLEFLS…	1257	12108	https://www.nature.com/articles/s41467-019-12607-6	http://cotton.hzau.edu.cn/EN/Download.htm
PlantKGA_88	Piperales	Piperaceae	Piper	nigrum	Piper nigrum	black pepper	胡椒	chromosome	Yes	基因	evmmodelPn19711	evmmodelPn197111288xxPlantKGA_88	evm.model.Pn19.711	L	partial	Pn5	33362368	33374475	-	Pfam	PF13855	Leucine rich repeat	Leucine-rich repeat	666	719	ASNNEISGLVPVVFGKMDRLETLDLSTNKLNGTVPQNLVGSPRLRALDLSGNNL	5.3e-10	MAKLLLLYSYLGLFTLFSINQCVSLDSYHPHCLPSQEAALIKFKEGLIDPSNRLESWQHGSDCCSWRGISCDKQTGYVIAMDLHNPQNPYANLPFDEHHKGWLASLDVSLGGKLGTSLMDLKKLQFLDLRLNSFEGIRIPEFIGSLVELKHLDLSYAGFHGRIPPNFGNLSKLEHLDVSSLVHTNATTSSSVVKIVNGARSSSLSCDNLQWMTSLVSLKVIQMNAVNLSELGHEPMHVFSSLPSLEKLGLSLCSLSASNHITFSNFTSLQFLDLSSNFFASEFPRWVVNITSMQYLDLSDNFFIGEFMYGLSDLPSLQVMYMVHNLVKVNCTRLFAGKWSKIAYLDIDYTDFSGSIPSSIGNITSLKRLSVMSFETMRNGLDGDIPQQIGKLKKLEFLS…	1257	12108	https://www.nature.com/articles/s41467-019-12607-6	http://cotton.hzau.edu.cn/EN/Download.htm
PlantKGA_88	Piperales	Piperaceae	Piper	nigrum	Piper nigrum	black pepper	胡椒	chromosome	Yes	基因	evmmodelPn19711	evmmodelPn197111288xxPlantKGA_88	evm.model.Pn19.711	L	partial	Pn5	33362368	33374475	-	Pfam	PF08263	Leucine rich repeat N-terminal domain	Leucine-rich repeat-containing N-terminal, plant-type	34	72	PSQEAALIKFKEGLIDPSNRLESWQHGSDCCSWRGISCD	2.2e-13	MAKLLLLYSYLGLFTLFSINQCVSLDSYHPHCLPSQEAALIKFKEGLIDPSNRLESWQHGSDCCSWRGISCDKQTGYVIAMDLHNPQNPYANLPFDEHHKGWLASLDVSLGGKLGTSLMDLKKLQFLDLRLNSFEGIRIPEFIGSLVELKHLDLSYAGFHGRIPPNFGNLSKLEHLDVSSLVHTNATTSSSVVKIVNGARSSSLSCDNLQWMTSLVSLKVIQMNAVNLSELGHEPMHVFSSLPSLEKLGLSLCSLSASNHITFSNFTSLQFLDLSSNFFASEFPRWVVNITSMQYLDLSDNFFIGEFMYGLSDLPSLQVMYMVHNLVKVNCTRLFAGKWSKIAYLDIDYTDFSGSIPSSIGNITSLKRLSVMSFETMRNGLDGDIPQQIGKLKKLEFLS…	1257	12108	https://www.nature.com/articles/s41467-019-12607-6	http://cotton.hzau.edu.cn/EN/Download.htm
PlantKGA_88	Piperales	Piperaceae	Piper	nigrum	Piper nigrum	black pepper	胡椒	chromosome	Yes	基因	evmmodelPn19712	evmmodelPn197121288xxPlantKGA_88	evm.model.Pn19.712	L	partial	Pn5	33395153	33395771	-	Pfam	PF13855	Leucine rich repeat	Leucine-rich repeat	43	98	MDLSNNNFSGVIPQEQTKLSELLVLNLSHNQLGEHIPGQIGEMKQLLTLDFSHNHL	1.2e-07	MKWKHAFTELFPMNDGYYKDKLTMTVSGKEDKYSTILFLVNCMDLSNNNFSGVIPQEQTKLSELLVLNLSHNQLGEHIPGQIGEMKQLLTLDFSHNHLSVLGLDLGQALGLFVAC	115	619	https://www.nature.com/articles/s41467-019-12607-6	http://cotton.hzau.edu.cn/EN/Download.htm
PlantKGA_88	Piperales	Piperaceae	Piper	nigrum	Piper nigrum	black pepper	胡椒	chromosome	Yes	基因	evmmodelPn19713	evmmodelPn197131288xxPlantKGA_88	evm.model.Pn19.713	L	partial	Pn5	33404684	33409528	-	Pfam	PF13855	Leucine rich repeat	Leucine-rich repeat	541	594	ASNNEISGLIPIVFGNMDRLITLDLSSNKLNGTVPQNLAGSPHLHALDLSGNNL	1.8e-09	MAKLLLLYSYLGLFALFSINQCVSLDYYHPHCLPSQETALIKFKESLIDPSNRLKSWQLGSDCCSWRGITCDNQTGYVIAMDLHNPQNAYANLPFDASQRMVLDLSLNSFEGIRIPEFIGSLVELKHLDLSYAGFHGRIPPNLGNLSKLEHLDVSSLVHTNATTSSSVVQIVDGARSSLLSCDNLQWMTSLVSLKVIQMNGVNLSAVGLEPMHVFSSLPSLEKLGLSCSLSASNHITFSNFTSLQFLDLSSNYIASEFPRWVVNITSLQYLDLSQNLFRGEFMYGLSDLPSLQVMYMTQNLVKVNCTKLFAGKWSNIAYLDIDYTDLSGSIPSSIGNITSLERLNVMSYERMRNGLEGNIPEEIGKLEKLEFLSLKYSKFVGKFPPKTINPHTLRYLQL…	1077	4845	https://www.nature.com/articles/s41467-019-12607-6	http://cotton.hzau.edu.cn/EN/Download.htm
PlantKGA_88	Piperales	Piperaceae	Piper	nigrum	Piper nigrum	black pepper	胡椒	chromosome	Yes	基因	evmmodelPn19713	evmmodelPn197131288xxPlantKGA_88	evm.model.Pn19.713	L	partial	Pn5	33404684	33409528	-	Pfam	PF13855	Leucine rich repeat	Leucine-rich repeat	219	277	PSLEKLGLSCSLSASNHITFSNFTSLQFLDLSSNYIASEFPRWVVNITSLQYLDLSQNL	1.2e-06	MAKLLLLYSYLGLFALFSINQCVSLDYYHPHCLPSQETALIKFKESLIDPSNRLKSWQLGSDCCSWRGITCDNQTGYVIAMDLHNPQNAYANLPFDASQRMVLDLSLNSFEGIRIPEFIGSLVELKHLDLSYAGFHGRIPPNLGNLSKLEHLDVSSLVHTNATTSSSVVQIVDGARSSLLSCDNLQWMTSLVSLKVIQMNGVNLSAVGLEPMHVFSSLPSLEKLGLSCSLSASNHITFSNFTSLQFLDLSSNYIASEFPRWVVNITSLQYLDLSQNLFRGEFMYGLSDLPSLQVMYMTQNLVKVNCTKLFAGKWSNIAYLDIDYTDLSGSIPSSIGNITSLERLNVMSYERMRNGLEGNIPEEIGKLEKLEFLSLKYSKFVGKFPPKTINPHTLRYLQL…	1077	4845	https://www.nature.com/articles/s41467-019-12607-6	http://cotton.hzau.edu.cn/EN/Download.htm
PlantKGA_88	Piperales	Piperaceae	Piper	nigrum	Piper nigrum	black pepper	胡椒	chromosome	Yes	基因	evmmodelPn19713	evmmodelPn197131288xxPlantKGA_88	evm.model.Pn19.713	L	partial	Pn5	33404684	33409528	-	Pfam	PF13855	Leucine rich repeat	Leucine-rich repeat	747	802	MDLSNNNFSGEIPQELTKLSELLVLNLSHNQLGEHIPGQIGEMKQLFTLDFSHNHL	1.9e-06	MAKLLLLYSYLGLFALFSINQCVSLDYYHPHCLPSQETALIKFKESLIDPSNRLKSWQLGSDCCSWRGITCDNQTGYVIAMDLHNPQNAYANLPFDASQRMVLDLSLNSFEGIRIPEFIGSLVELKHLDLSYAGFHGRIPPNLGNLSKLEHLDVSSLVHTNATTSSSVVQIVDGARSSLLSCDNLQWMTSLVSLKVIQMNGVNLSAVGLEPMHVFSSLPSLEKLGLSCSLSASNHITFSNFTSLQFLDLSSNYIASEFPRWVVNITSLQYLDLSQNLFRGEFMYGLSDLPSLQVMYMTQNLVKVNCTKLFAGKWSNIAYLDIDYTDLSGSIPSSIGNITSLERLNVMSYERMRNGLEGNIPEEIGKLEKLEFLSLKYSKFVGKFPPKTINPHTLRYLQL…	1077	4845	https://www.nature.com/articles/s41467-019-12607-6	http://cotton.hzau.edu.cn/EN/Download.htm
PlantKGA_88	Piperales	Piperaceae	Piper	nigrum	Piper nigrum	black pepper	胡椒	chromosome	Yes	基因	evmmodelPn19713	evmmodelPn197131288xxPlantKGA_88	evm.model.Pn19.713	L	partial	Pn5	33404684	33409528	-	Pfam	PF08263	Leucine rich repeat N-terminal domain	Leucine-rich repeat-containing N-terminal, plant-type	34	72	PSQETALIKFKESLIDPSNRLKSWQLGSDCCSWRGITCD	1.7e-13	MAKLLLLYSYLGLFALFSINQCVSLDYYHPHCLPSQETALIKFKESLIDPSNRLKSWQLGSDCCSWRGITCDNQTGYVIAMDLHNPQNAYANLPFDASQRMVLDLSLNSFEGIRIPEFIGSLVELKHLDLSYAGFHGRIPPNLGNLSKLEHLDVSSLVHTNATTSSSVVQIVDGARSSLLSCDNLQWMTSLVSLKVIQMNGVNLSAVGLEPMHVFSSLPSLEKLGLSCSLSASNHITFSNFTSLQFLDLSSNYIASEFPRWVVNITSLQYLDLSQNLFRGEFMYGLSDLPSLQVMYMTQNLVKVNCTKLFAGKWSNIAYLDIDYTDLSGSIPSSIGNITSLERLNVMSYERMRNGLEGNIPEEIGKLEKLEFLSLKYSKFVGKFPPKTINPHTLRYLQL…	1077	4845	https://www.nature.com/articles/s41467-019-12607-6	http://cotton.hzau.edu.cn/EN/Download.htm
PlantKGA_88	Piperales	Piperaceae	Piper	nigrum	Piper nigrum	black pepper	胡椒	chromosome	Yes	基因	evmmodelPn19716	evmmodelPn197161288xxPlantKGA_88	evm.model.Pn19.716	L	partial	Pn5	33423614	33429377	-	Pfam	PF13855	Leucine rich repeat	Leucine-rich repeat	84	137	ASNNEISGLIPVVFGNMDRLETLDLSTNKLNGTVPQNLVGSPRLRALDLSGNNL	6.9e-11	MVLGKVVLIHLNLSHNRILGHLPNPFMLFQSDQGLLDLSFNEFSGPVPCFSDGIVHVDVSYNQITGQLPDNIHSSTKNFKTFLASNNEISGLIPVVFGNMDRLETLDLSTNKLNGTVPQNLVGSPRLRALDLSGNNLSGEMHWNLPKGSALRSLHLAENTLSGEFPAWLENCTHLEVLVLSQNKFSGKIPQWIGESSASLKILDLRSNRFTGQIPWQLCYLSSLQVLNVANNYLNGSIPKSFGNFKAMKEKHAFAEWFPMNDGYYKDKLTMTVSGKEDEYSTILFLVNCMDLSNNNFSGEMPQELTKLSELLVLNLSHNQLGENIPGQIGEMKQLLTLDFSHNHLSGEIPSGLQLQTLDDPYIYIGNSELCGFPLKKNCSNSTSWYSPNSLGWSWKDNQ…	561	5764	https://www.nature.com/articles/s41467-019-12607-6	http://cotton.hzau.edu.cn/EN/Download.htm
PlantKGA_88	Piperales	Piperaceae	Piper	nigrum	Piper nigrum	black pepper	胡椒	chromosome	Yes	基因	evmmodelPn19716	evmmodelPn197161288xxPlantKGA_88	evm.model.Pn19.716	L	partial	Pn5	33423614	33429377	-	Pfam	PF00560	Leucine Rich Repeat	Leucine-rich repeat	223	245	SLQVLNVANNYLNGSIPKSFGNF	0.96	MVLGKVVLIHLNLSHNRILGHLPNPFMLFQSDQGLLDLSFNEFSGPVPCFSDGIVHVDVSYNQITGQLPDNIHSSTKNFKTFLASNNEISGLIPVVFGNMDRLETLDLSTNKLNGTVPQNLVGSPRLRALDLSGNNLSGEMHWNLPKGSALRSLHLAENTLSGEFPAWLENCTHLEVLVLSQNKFSGKIPQWIGESSASLKILDLRSNRFTGQIPWQLCYLSSLQVLNVANNYLNGSIPKSFGNFKAMKEKHAFAEWFPMNDGYYKDKLTMTVSGKEDEYSTILFLVNCMDLSNNNFSGEMPQELTKLSELLVLNLSHNQLGENIPGQIGEMKQLLTLDFSHNHLSGEIPSGLQLQTLDDPYIYIGNSELCGFPLKKNCSNSTSWYSPNSLGWSWKDNQ…	561	5764	https://www.nature.com/articles/s41467-019-12607-6	http://cotton.hzau.edu.cn/EN/Download.htm
PlantKGA_88	Piperales	Piperaceae	Piper	nigrum	Piper nigrum	black pepper	胡椒	chromosome	Yes	基因	evmmodelPn19717	evmmodelPn197171288xxPlantKGA_88	evm.model.Pn19.717	L	partial	Pn5	33429415	33431058	-	Pfam	PF13855	Leucine rich repeat	Leucine-rich repeat	402	461	LTTLALDRNHLNGTIPVELGKLSQLETLDLSHNSFQGIVHDTHFQNLNRLSVLDLSRNAI	6.6e-09	MAKLLLLYSYLGFFTLFPINQCLCLDYYHPHCLPSQETAIIKFKESWQLGSDCCCWPGITCDNQTGYVIAMDLHNPQNPYANLPFDEHHKGWLASLDVSLGGKLGTSLMDLKKLQFLDLRLNSFEGIRIPEFIGSLVELKHLDLSYAGFHGRIPPNVGNLSKLEHLAVSSLVHTNATTSSSVVQIVNGARSSSLSCDNLQWMTSLVSLKVIQMNGVNLSALGHEPMHVFSSLPSLEKLGLSLCSLSASNHITFSNFTSLQFLDLSSNFFASEFPRWVVNITNYTDFSGSIPSSIGNITSLKRLSVMSFGIMRNGLDGNIPQQIGKLKKLEFLSLRYNKFVGKFPPKIINPHSLRYLRLDGVELQSSVNLHWFCQFKFLVALWLSNCHLTGPIPICLTEM…	491	1644	https://www.nature.com/articles/s41467-019-12607-6	http://cotton.hzau.edu.cn/EN/Download.htm
PlantKGA_88	Piperales	Piperaceae	Piper	nigrum	Piper nigrum	black pepper	胡椒	chromosome	Yes	基因	evmmodelPn19721	evmmodelPn197211288xxPlantKGA_88	evm.model.Pn19.721	L	partial	Pn5	33492570	33495751	-	Pfam	PF08263	Leucine rich repeat N-terminal domain	Leucine-rich repeat-containing N-terminal, plant-type	34	72	PSQEAALIKFKEGLIDPSNRLKSWQLGSDCCSWQGITCD	4e-13	MAKLLLLYSYLSLFTLFSMNQCVSQDYYHPHCLPSQEAALIKFKEGLIDPSNRLKSWQLGSDCCSWQGITCDNQTGYVISMDLHNPKNPYANLPFDENQKGWLASLDVSLGGKLGRSLMDLKKLQFLDLRLNSFEGIRLPEFIGSLVELKHLDLSYAGFHGRIPPNLGNLSKLEHLDVSSLVHTNATTSSSVLQIVNAARTSSLSCDNLQWMTSLVSLKVIQMNGVNISALGHEPMHVFSSLPSLEKLGLSLSSLTVPNNITFSNFTSLQFLDLSSNYMASEIPRWLVNITSLQYLDLSHNSFRGEFMYGLSDLPSLQAMYMTQNFVKVNCTKLFAGKWSNIAYLDIEYTDFSGSIPSSIGNITSLKHLNVMSNLRMRNGLEGNIPQEIGELEKLEFLS…	1016	3182	https://www.nature.com/articles/s41467-019-12607-6	http://cotton.hzau.edu.cn/EN/Download.htm
PlantKGA_88	Piperales	Piperaceae	Piper	nigrum	Piper nigrum	black pepper	胡椒	chromosome	Yes	基因	evmmodelPn19721	evmmodelPn197211288xxPlantKGA_88	evm.model.Pn19.721	L	partial	Pn5	33492570	33495751	-	Pfam	PF13855	Leucine rich repeat	Leucine-rich repeat	605	658	ASNNEISGLIPVVFGNMDRLATLDLSSNKLNGTVPENLVGSPHLRALDLSGNNL	1.6e-10	MAKLLLLYSYLSLFTLFSMNQCVSQDYYHPHCLPSQEAALIKFKEGLIDPSNRLKSWQLGSDCCSWQGITCDNQTGYVISMDLHNPKNPYANLPFDENQKGWLASLDVSLGGKLGRSLMDLKKLQFLDLRLNSFEGIRLPEFIGSLVELKHLDLSYAGFHGRIPPNLGNLSKLEHLDVSSLVHTNATTSSSVLQIVNAARTSSLSCDNLQWMTSLVSLKVIQMNGVNISALGHEPMHVFSSLPSLEKLGLSLSSLTVPNNITFSNFTSLQFLDLSSNYMASEIPRWLVNITSLQYLDLSHNSFRGEFMYGLSDLPSLQAMYMTQNFVKVNCTKLFAGKWSNIAYLDIEYTDFSGSIPSSIGNITSLKHLNVMSNLRMRNGLEGNIPQEIGELEKLEFLS…	1016	3182	https://www.nature.com/articles/s41467-019-12607-6	http://cotton.hzau.edu.cn/EN/Download.htm
PlantKGA_88	Piperales	Piperaceae	Piper	nigrum	Piper nigrum	black pepper	胡椒	chromosome	Yes	基因	evmmodelPn19721	evmmodelPn197211288xxPlantKGA_88	evm.model.Pn19.721	L	partial	Pn5	33492570	33495751	-	Pfam	PF13855	Leucine rich repeat	Leucine-rich repeat	491	551	QLEILDLSHNSFQGIVHDTHFQNLNSLSVLDLSHNAIVFKPRSTWSPPPNLSFVGLASCQI	1e-08	MAKLLLLYSYLSLFTLFSMNQCVSQDYYHPHCLPSQEAALIKFKEGLIDPSNRLKSWQLGSDCCSWQGITCDNQTGYVISMDLHNPKNPYANLPFDENQKGWLASLDVSLGGKLGRSLMDLKKLQFLDLRLNSFEGIRLPEFIGSLVELKHLDLSYAGFHGRIPPNLGNLSKLEHLDVSSLVHTNATTSSSVLQIVNAARTSSLSCDNLQWMTSLVSLKVIQMNGVNISALGHEPMHVFSSLPSLEKLGLSLSSLTVPNNITFSNFTSLQFLDLSSNYMASEIPRWLVNITSLQYLDLSHNSFRGEFMYGLSDLPSLQAMYMTQNFVKVNCTKLFAGKWSNIAYLDIEYTDFSGSIPSSIGNITSLKHLNVMSNLRMRNGLEGNIPQEIGELEKLEFLS…	1016	3182	https://www.nature.com/articles/s41467-019-12607-6	http://cotton.hzau.edu.cn/EN/Download.htm
PlantKGA_88	Piperales	Piperaceae	Piper	nigrum	Piper nigrum	black pepper	胡椒	chromosome	Yes	基因	evmmodelPn19721	evmmodelPn197211288xxPlantKGA_88	evm.model.Pn19.721	L	partial	Pn5	33492570	33495751	-	Pfam	PF13855	Leucine rich repeat	Leucine-rich repeat	671	731	ALRSLHLAENALSGEFPTWLENCTHLEVLVLSKNKFSGKIPQWISESSASLKILDVRSNRF	2.2e-06	MAKLLLLYSYLSLFTLFSMNQCVSQDYYHPHCLPSQEAALIKFKEGLIDPSNRLKSWQLGSDCCSWQGITCDNQTGYVISMDLHNPKNPYANLPFDENQKGWLASLDVSLGGKLGRSLMDLKKLQFLDLRLNSFEGIRLPEFIGSLVELKHLDLSYAGFHGRIPPNLGNLSKLEHLDVSSLVHTNATTSSSVLQIVNAARTSSLSCDNLQWMTSLVSLKVIQMNGVNISALGHEPMHVFSSLPSLEKLGLSLSSLTVPNNITFSNFTSLQFLDLSSNYMASEIPRWLVNITSLQYLDLSHNSFRGEFMYGLSDLPSLQAMYMTQNFVKVNCTKLFAGKWSNIAYLDIEYTDFSGSIPSSIGNITSLKHLNVMSNLRMRNGLEGNIPQEIGELEKLEFLS…	1016	3182	https://www.nature.com/articles/s41467-019-12607-6	http://cotton.hzau.edu.cn/EN/Download.htm
PlantKGA_88	Piperales	Piperaceae	Piper	nigrum	Piper nigrum	black pepper	胡椒	chromosome	Yes	基因	evmmodelPn19724	evmmodelPn197241288xxPlantKGA_88	evm.model.Pn19.724	L	partial	Pn5	33543060	33543678	-	Pfam	PF13855	Leucine rich repeat	Leucine-rich repeat	43	98	MDLSNNNFSGVIPQEQTKLSELLVLNLSHNQLGEHIPGQIGEMKQLLTLDFSHNHL	1.2e-07	MKWKHAFTELFPMNDGYYKDKLTMTVSGKEDKYSTILFLVNCMDLSNNNFSGVIPQEQTKLSELLVLNLSHNQLGEHIPGQIGEMKQLLTLDFSHNHLSVLGLDLGQALGLFVAC	115	619	https://www.nature.com/articles/s41467-019-12607-6	http://cotton.hzau.edu.cn/EN/Download.htm
PlantKGA_88	Piperales	Piperaceae	Piper	nigrum	Piper nigrum	black pepper	胡椒	chromosome	Yes	基因	evmmodelPn19725	evmmodelPn197251288xxPlantKGA_88	evm.model.Pn19.725	L	partial	Pn5	33552264	33557433	-	Pfam	PF13855	Leucine rich repeat	Leucine-rich repeat	743	798	MDLSNNNFSGEIPQELTKLSELLVLNLSHNQLGEHIPGQIGEMKQLFTLDFSHNHL	1.9e-06	MAKLLLLYSYLGLFALFSINQCVSLDYYHPHCLPSQETALIKFKESLIDPSNRLKSWQLGSDCCSWRGITCDNQTGYVIAMDLHNPQNAYANLPFDASQRMVLDLSLNSFEGIRIPEFIGSLVELKHLDLSYAGFHGRIPPNLGNLSKLEHLDVSSLVHTNATTSSSVVQIVDGARSSLLSCDNLQWMTSLVSLKVIQMNGVNLSAVGLEPMHVFSSLPSLEKLGLSCSLSASNHITFSNFTSLQFLDLSSNYIASEFPRWVVNITSLQYLDLSQNLFMYGLSDLPSLQVMYMTQNLVKVNCTKLFAGKWSNIAYLDIDYTDLSGSIPSSIGNITSLERLNVMSYERMRNGLEGNIPEEIGKLEKLEFLSLKYSKFVGKFPPKTINPHTLRYLQLDGVE…	1089	5170	https://www.nature.com/articles/s41467-019-12607-6	http://cotton.hzau.edu.cn/EN/Download.htm
PlantKGA_88	Piperales	Piperaceae	Piper	nigrum	Piper nigrum	black pepper	胡椒	chromosome	Yes	基因	evmmodelPn19725	evmmodelPn197251288xxPlantKGA_88	evm.model.Pn19.725	L	partial	Pn5	33552264	33557433	-	Pfam	PF13855	Leucine rich repeat	Leucine-rich repeat	219	277	PSLEKLGLSCSLSASNHITFSNFTSLQFLDLSSNYIASEFPRWVVNITSLQYLDLSQNL	3.6e-07	MAKLLLLYSYLGLFALFSINQCVSLDYYHPHCLPSQETALIKFKESLIDPSNRLKSWQLGSDCCSWRGITCDNQTGYVIAMDLHNPQNAYANLPFDASQRMVLDLSLNSFEGIRIPEFIGSLVELKHLDLSYAGFHGRIPPNLGNLSKLEHLDVSSLVHTNATTSSSVVQIVDGARSSLLSCDNLQWMTSLVSLKVIQMNGVNLSAVGLEPMHVFSSLPSLEKLGLSCSLSASNHITFSNFTSLQFLDLSSNYIASEFPRWVVNITSLQYLDLSQNLFMYGLSDLPSLQVMYMTQNLVKVNCTKLFAGKWSNIAYLDIDYTDLSGSIPSSIGNITSLERLNVMSYERMRNGLEGNIPEEIGKLEKLEFLSLKYSKFVGKFPPKTINPHTLRYLQLDGVE…	1089	5170	https://www.nature.com/articles/s41467-019-12607-6	http://cotton.hzau.edu.cn/EN/Download.htm
PlantKGA_88	Piperales	Piperaceae	Piper	nigrum	Piper nigrum	black pepper	胡椒	chromosome	Yes	基因	evmmodelPn19725	evmmodelPn197251288xxPlantKGA_88	evm.model.Pn19.725	L	partial	Pn5	33552264	33557433	-	Pfam	PF13855	Leucine rich repeat	Leucine-rich repeat	537	590	ASNNEISGLIPIVFGNMDRLITLDLSSNKLNGTVPQNLAGSPHLHALDLSGNNL	1.8e-09	MAKLLLLYSYLGLFALFSINQCVSLDYYHPHCLPSQETALIKFKESLIDPSNRLKSWQLGSDCCSWRGITCDNQTGYVIAMDLHNPQNAYANLPFDASQRMVLDLSLNSFEGIRIPEFIGSLVELKHLDLSYAGFHGRIPPNLGNLSKLEHLDVSSLVHTNATTSSSVVQIVDGARSSLLSCDNLQWMTSLVSLKVIQMNGVNLSAVGLEPMHVFSSLPSLEKLGLSCSLSASNHITFSNFTSLQFLDLSSNYIASEFPRWVVNITSLQYLDLSQNLFMYGLSDLPSLQVMYMTQNLVKVNCTKLFAGKWSNIAYLDIDYTDLSGSIPSSIGNITSLERLNVMSYERMRNGLEGNIPEEIGKLEKLEFLSLKYSKFVGKFPPKTINPHTLRYLQLDGVE…	1089	5170	https://www.nature.com/articles/s41467-019-12607-6	http://cotton.hzau.edu.cn/EN/Download.htm
PlantKGA_88	Piperales	Piperaceae	Piper	nigrum	Piper nigrum	black pepper	胡椒	chromosome	Yes	基因	evmmodelPn19725	evmmodelPn197251288xxPlantKGA_88	evm.model.Pn19.725	L	partial	Pn5	33552264	33557433	-	Pfam	PF08263	Leucine rich repeat N-terminal domain	Leucine-rich repeat-containing N-terminal, plant-type	34	72	PSQETALIKFKESLIDPSNRLKSWQLGSDCCSWRGITCD	1.7e-13	MAKLLLLYSYLGLFALFSINQCVSLDYYHPHCLPSQETALIKFKESLIDPSNRLKSWQLGSDCCSWRGITCDNQTGYVIAMDLHNPQNAYANLPFDASQRMVLDLSLNSFEGIRIPEFIGSLVELKHLDLSYAGFHGRIPPNLGNLSKLEHLDVSSLVHTNATTSSSVVQIVDGARSSLLSCDNLQWMTSLVSLKVIQMNGVNLSAVGLEPMHVFSSLPSLEKLGLSCSLSASNHITFSNFTSLQFLDLSSNYIASEFPRWVVNITSLQYLDLSQNLFMYGLSDLPSLQVMYMTQNLVKVNCTKLFAGKWSNIAYLDIDYTDLSGSIPSSIGNITSLERLNVMSYERMRNGLEGNIPEEIGKLEKLEFLSLKYSKFVGKFPPKTINPHTLRYLQLDGVE…	1089	5170	https://www.nature.com/articles/s41467-019-12607-6	http://cotton.hzau.edu.cn/EN/Download.htm
PlantKGA_88	Piperales	Piperaceae	Piper	nigrum	Piper nigrum	black pepper	胡椒	chromosome	Yes	基因	evmmodelPn19729	evmmodelPn197291288xxPlantKGA_88	evm.model.Pn19.729	L	partial	Pn5	33576800	33579697	-	Pfam	PF13855	Leucine rich repeat	Leucine-rich repeat	622	675	ASNNEISGLIPVVFGKMDRLETLDLSTNKLNGTVPQNLVGSPRLRALDLSGNNL	2.5e-10	MAKLLLLYSYLGFFTLFSINQCLCLDYYHPHCLPSQETALIKFKEGLIDPSNRLESWQLGSDCCSWRGITCDNQTGYVIAMDLHNPQNPYANLPFDEHRKGWLASLDVSLGGKLGTSLMDLKKLQFLDLRLNSFEGIRIPEFIGSLVELKHLDLSYAGFHGRIPPNFGNLSKLEHLDVSSLVHTNATTSSSVVQIVNGARSSSLSCDNLQWMTSLVSLKVIQMNGVNLSALGHEPMHVFSSLPSLEKLGLSLCSLSASNHITFSNFTSLQFLDLSSNFFASEFPRWVVNITSMLYLDLSYNFFIGEFMYGLSDLPSLQVMYMVHNLVKVNCTRLFAGKWSKIAYLDIDYTDFSGSIPSSIGNITSLKRLSVMSFEKMRNGLDGNIPQQIGKLQKLEFLS…	908	2898	https://www.nature.com/articles/s41467-019-12607-6	http://cotton.hzau.edu.cn/EN/Download.htm
PlantKGA_88	Piperales	Piperaceae	Piper	nigrum	Piper nigrum	black pepper	胡椒	chromosome	Yes	基因	evmmodelPn19729	evmmodelPn197291288xxPlantKGA_88	evm.model.Pn19.729	L	partial	Pn5	33576800	33579697	-	Pfam	PF13855	Leucine rich repeat	Leucine-rich repeat	424	483	LTTLALDRNHLNGTIPVELGKLSQLETLDLSHNSFQGIVHDTHFQNLNRLSVLDLSRNAI	5.3e-09	MAKLLLLYSYLGFFTLFSINQCLCLDYYHPHCLPSQETALIKFKEGLIDPSNRLESWQLGSDCCSWRGITCDNQTGYVIAMDLHNPQNPYANLPFDEHRKGWLASLDVSLGGKLGTSLMDLKKLQFLDLRLNSFEGIRIPEFIGSLVELKHLDLSYAGFHGRIPPNFGNLSKLEHLDVSSLVHTNATTSSSVVQIVNGARSSSLSCDNLQWMTSLVSLKVIQMNGVNLSALGHEPMHVFSSLPSLEKLGLSLCSLSASNHITFSNFTSLQFLDLSSNFFASEFPRWVVNITSMLYLDLSYNFFIGEFMYGLSDLPSLQVMYMVHNLVKVNCTRLFAGKWSKIAYLDIDYTDFSGSIPSSIGNITSLKRLSVMSFEKMRNGLDGNIPQQIGKLQKLEFLS…	908	2898	https://www.nature.com/articles/s41467-019-12607-6	http://cotton.hzau.edu.cn/EN/Download.htm
PlantKGA_88	Piperales	Piperaceae	Piper	nigrum	Piper nigrum	black pepper	胡椒	chromosome	Yes	基因	evmmodelPn19729	evmmodelPn197291288xxPlantKGA_88	evm.model.Pn19.729	L	partial	Pn5	33576800	33579697	-	Pfam	PF13855	Leucine rich repeat	Leucine-rich repeat	496	556	NLLIVALASCQIGPIFPSWLKQLEHVSYLDLSRNEVKGSLPQWFWEIEPVLIHLNLSHNRI	4.9e-07	MAKLLLLYSYLGFFTLFSINQCLCLDYYHPHCLPSQETALIKFKEGLIDPSNRLESWQLGSDCCSWRGITCDNQTGYVIAMDLHNPQNPYANLPFDEHRKGWLASLDVSLGGKLGTSLMDLKKLQFLDLRLNSFEGIRIPEFIGSLVELKHLDLSYAGFHGRIPPNFGNLSKLEHLDVSSLVHTNATTSSSVVQIVNGARSSSLSCDNLQWMTSLVSLKVIQMNGVNLSALGHEPMHVFSSLPSLEKLGLSLCSLSASNHITFSNFTSLQFLDLSSNFFASEFPRWVVNITSMLYLDLSYNFFIGEFMYGLSDLPSLQVMYMVHNLVKVNCTRLFAGKWSKIAYLDIDYTDFSGSIPSSIGNITSLKRLSVMSFEKMRNGLDGNIPQQIGKLQKLEFLS…	908	2898	https://www.nature.com/articles/s41467-019-12607-6	http://cotton.hzau.edu.cn/EN/Download.htm
PlantKGA_88	Piperales	Piperaceae	Piper	nigrum	Piper nigrum	black pepper	胡椒	chromosome	Yes	基因	evmmodelPn19729	evmmodelPn197291288xxPlantKGA_88	evm.model.Pn19.729	L	partial	Pn5	33576800	33579697	-	Pfam	PF08263	Leucine rich repeat N-terminal domain	Leucine-rich repeat-containing N-terminal, plant-type	34	72	PSQETALIKFKEGLIDPSNRLESWQLGSDCCSWRGITCD	1.4e-13	MAKLLLLYSYLGFFTLFSINQCLCLDYYHPHCLPSQETALIKFKEGLIDPSNRLESWQLGSDCCSWRGITCDNQTGYVIAMDLHNPQNPYANLPFDEHRKGWLASLDVSLGGKLGTSLMDLKKLQFLDLRLNSFEGIRIPEFIGSLVELKHLDLSYAGFHGRIPPNFGNLSKLEHLDVSSLVHTNATTSSSVVQIVNGARSSSLSCDNLQWMTSLVSLKVIQMNGVNLSALGHEPMHVFSSLPSLEKLGLSLCSLSASNHITFSNFTSLQFLDLSSNFFASEFPRWVVNITSMLYLDLSYNFFIGEFMYGLSDLPSLQVMYMVHNLVKVNCTRLFAGKWSKIAYLDIDYTDFSGSIPSSIGNITSLKRLSVMSFEKMRNGLDGNIPQQIGKLQKLEFLS…	908	2898	https://www.nature.com/articles/s41467-019-12607-6	http://cotton.hzau.edu.cn/EN/Download.htm
PlantKGA_88	Piperales	Piperaceae	Piper	nigrum	Piper nigrum	black pepper	胡椒	chromosome	Yes	基因	evmmodelPn19729	evmmodelPn197291288xxPlantKGA_88	evm.model.Pn19.729	L	partial	Pn5	33576800	33579697	-	Pfam	PF00560	Leucine Rich Repeat	Leucine-rich repeat	761	783	SLQVLNVANNYLNGSIPKSFGNF	1.7	MAKLLLLYSYLGFFTLFSINQCLCLDYYHPHCLPSQETALIKFKEGLIDPSNRLESWQLGSDCCSWRGITCDNQTGYVIAMDLHNPQNPYANLPFDEHRKGWLASLDVSLGGKLGTSLMDLKKLQFLDLRLNSFEGIRIPEFIGSLVELKHLDLSYAGFHGRIPPNFGNLSKLEHLDVSSLVHTNATTSSSVVQIVNGARSSSLSCDNLQWMTSLVSLKVIQMNGVNLSALGHEPMHVFSSLPSLEKLGLSLCSLSASNHITFSNFTSLQFLDLSSNFFASEFPRWVVNITSMLYLDLSYNFFIGEFMYGLSDLPSLQVMYMVHNLVKVNCTRLFAGKWSKIAYLDIDYTDFSGSIPSSIGNITSLKRLSVMSFEKMRNGLDGNIPQQIGKLQKLEFLS…	908	2898	https://www.nature.com/articles/s41467-019-12607-6	http://cotton.hzau.edu.cn/EN/Download.htm
PlantKGA_88	Piperales	Piperaceae	Piper	nigrum	Piper nigrum	black pepper	胡椒	chromosome	Yes	基因	evmmodelPn19741	evmmodelPn197411288xxPlantKGA_88	evm.model.Pn19.741	L	partial	Pn5	27930304	27931275	+	Pfam	PF13855	Leucine rich repeat	Leucine-rich repeat	164	224	NLLIVALASCQIGPIFPSWLKQLEHVSYLDLSRNEVKGSLPQWFWEIEPVLIHLNLSHNRI	1.2e-07	MRNGLDGNIPQQIGKLKKLEFLSLRYNKFVGKFPPKIINPQSLRYLQLDGVELQGSVNLHWFCQFKFLMALWLSNCHLTGPIPTCLAEMPFLTILALDRNHLNGTIPVELGKLSQLEILDLSRNSFQGIVLDTHFQNLNRLSVLYLSHNAIVFKPISTWSPPRNLLIVALASCQIGPIFPSWLKQLEHVSYLDLSRNEVKGSLPQWFWEIEPVLIHLNLSHNRILGHLPNPFMLFQSDQGLLDLSFNEFSAPVPCFSDGILHVDVSYNQITGQLPDNIHSSTKIFKTFLASNNEISGLIPVVFGNMDSLETLDLSTSLEFAKG	323	972	https://www.nature.com/articles/s41467-019-12607-6	http://cotton.hzau.edu.cn/EN/Download.htm
PlantKGA_88	Piperales	Piperaceae	Piper	nigrum	Piper nigrum	black pepper	胡椒	chromosome	Yes	基因	evmmodelPn19741	evmmodelPn197411288xxPlantKGA_88	evm.model.Pn19.741	L	partial	Pn5	27930304	27931275	+	Pfam	PF13855	Leucine rich repeat	Leucine-rich repeat	92	151	LTILALDRNHLNGTIPVELGKLSQLEILDLSRNSFQGIVLDTHFQNLNRLSVLYLSHNAI	4.8e-08	MRNGLDGNIPQQIGKLKKLEFLSLRYNKFVGKFPPKIINPQSLRYLQLDGVELQGSVNLHWFCQFKFLMALWLSNCHLTGPIPTCLAEMPFLTILALDRNHLNGTIPVELGKLSQLEILDLSRNSFQGIVLDTHFQNLNRLSVLYLSHNAIVFKPISTWSPPRNLLIVALASCQIGPIFPSWLKQLEHVSYLDLSRNEVKGSLPQWFWEIEPVLIHLNLSHNRILGHLPNPFMLFQSDQGLLDLSFNEFSAPVPCFSDGILHVDVSYNQITGQLPDNIHSSTKIFKTFLASNNEISGLIPVVFGNMDSLETLDLSTSLEFAKG	323	972	https://www.nature.com/articles/s41467-019-12607-6	http://cotton.hzau.edu.cn/EN/Download.htm
PlantKGA_88	Piperales	Piperaceae	Piper	nigrum	Piper nigrum	black pepper	胡椒	chromosome	Yes	基因	evmmodelPn19742	evmmodelPn197421288xxPlantKGA_88	evm.model.Pn19.742	L	partial	Pn5	27929624	27930265	+	Pfam	PF08263	Leucine rich repeat N-terminal domain	Leucine-rich repeat-containing N-terminal, plant-type	34	72	PSQETALIKFKEGLIDPSNRLESWQLGSDCCSWRGITCD	2e-14	MATLLLLYSYLVYFTLFSINQCLCLDYYHPHCLPSQETALIKFKEGLIDPSNRLESWQLGSDCCSWRGITCDNQTGYVIAMDLPNPQNPYANLPFDEHHKGWLASLDVSLGGKLGTSLMDLKKLQFLDLRLNSFEGIRIPEFIGSLVELKHLDLSYAGFHGRIPPNFGNLSKLEHLDVSSLVHTNATTSSTVVQILNGARSSSLSCDNLQLGT	213	642	https://www.nature.com/articles/s41467-019-12607-6	http://cotton.hzau.edu.cn/EN/Download.htm
PlantKGA_88	Piperales	Piperaceae	Piper	nigrum	Piper nigrum	black pepper	胡椒	chromosome	Yes	基因	evmmodelPn19753	evmmodelPn197531288xxPlantKGA_88	evm.model.Pn19.753	L	partial	Pn5	27716723	27717415	-	Pfam	PF08263	Leucine rich repeat N-terminal domain	Leucine-rich repeat-containing N-terminal, plant-type	34	72	PSQEAALIKFKEGLIDPSNRLESWQLGSDCCSWRGITCD	1.7e-14	MAKLFLLYSYLSLFTLFSINQCASLDFYHPPCLPSQEAALIKFKEGLIDPSNRLESWQLGSDCCSWRGITCDNQTGYVIAIDLHNPQNPYANLPFDEHHKGWLASLDVSLGGKLGTSLMDLKKLQFLDLSLNSFEGIRIPEFIGSLVELKHLDLSYAGFHGRIPPNLGNLSKLEHLDVSSLVHTTSSYVAQIFNGAHTSLLSCDNLQWMTSLVSLKVIQMNGGEPFSIEP	230	693	https://www.nature.com/articles/s41467-019-12607-6	http://cotton.hzau.edu.cn/EN/Download.htm
PlantKGA_88	Piperales	Piperaceae	Piper	nigrum	Piper nigrum	black pepper	胡椒	chromosome	Yes	基因	evmmodelPn19760	evmmodelPn197601288xxPlantKGA_88	evm.model.Pn19.760	L	partial	Pn5	27624508	27626890	-	Pfam	PF13516	Leucine Rich repeat	Leucine-rich repeat	235	250	SSLRALDLGGNNLSGE	0.94	MDLHNPQNPYESLPFDEHHKGWLASPGGKLGTSLTDLKKLQFLDLRLNSFEGIRIRELIGSLVELKHLDLSYARFHGRIPPNLGNLSKLEHLDVSSLVHTNANIRSYIAQFISVARTSSLSCDNLQWMTSLFSLNVVQMNEVNLSALGHEPMHVFSSLPSLEKLGLSLCSLSASNNITFSNFTPSQFLDLSSSYIDRKAQETGVQGILDLSFNEFSGPAPCFSDGIVTKKIGRLSSLRALDLGGNNLSGEIHWNLPKGNALRSLYLAENAISGEFPAWLENCAHLEVLVLSQNKFSGKIPQWISESSPSHKILDLRFNRFTGQIPWQLGYLSSLQVLNVAGNYLNGSIPKSFGKFKAMKEKHAFSEWFPMNDGYYKDKLTMTVSGKEDEYITMLFLVNC…	581	2383	https://www.nature.com/articles/s41467-019-12607-6	http://cotton.hzau.edu.cn/EN/Download.htm
PlantKGA_88	Piperales	Piperaceae	Piper	nigrum	Piper nigrum	black pepper	胡椒	chromosome	Yes	基因	evmmodelPn19771	evmmodelPn197711288xxPlantKGA_88	evm.model.Pn19.771	L	partial	Pn5	27485938	27487141	+	Pfam	PF13516	Leucine Rich repeat	Leucine-rich repeat	168	183	TFLNHLNLSYNNFSGE	0.57	MSFQAPSHAFLMGLCMLMFHTTRSVDNYQITSIAPPKASLLFWLLIMKLVVLIPLVFGNMDRLPTLDLSANKLNATVPQYLVGSPHLRALDLSGNNLSACNYLNGSIPKSFGNFKAMKEKHAFTDWFPFNDGYYKDKLTMTVSGKEDEYSTILFLVNCMLPQGLAALTFLNHLNLSYNNFSGEIPSGFQLQTLDDPSIYNENSELCGFPLKRNCSNSTSWHSPNSLGWSWKDNQDYEGPLDMFVVYIGIGP	251	1204	https://www.nature.com/articles/s41467-019-12607-6	http://cotton.hzau.edu.cn/EN/Download.htm
PlantKGA_88	Piperales	Piperaceae	Piper	nigrum	Piper nigrum	black pepper	胡椒	chromosome	Yes	基因	evmmodelPn19771	evmmodelPn197711288xxPlantKGA_88	evm.model.Pn19.771	L	partial	Pn5	27485938	27487141	+	Pfam	PF13855	Leucine rich repeat	Leucine-rich repeat	49	97	LVVLIPLVFGNMDRLPTLDLSANKLNATVPQYLVGSPHLRALDLSGNNL	3.8e-08	MSFQAPSHAFLMGLCMLMFHTTRSVDNYQITSIAPPKASLLFWLLIMKLVVLIPLVFGNMDRLPTLDLSANKLNATVPQYLVGSPHLRALDLSGNNLSACNYLNGSIPKSFGNFKAMKEKHAFTDWFPFNDGYYKDKLTMTVSGKEDEYSTILFLVNCMLPQGLAALTFLNHLNLSYNNFSGEIPSGFQLQTLDDPSIYNENSELCGFPLKRNCSNSTSWHSPNSLGWSWKDNQDYEGPLDMFVVYIGIGP	251	1204	https://www.nature.com/articles/s41467-019-12607-6	http://cotton.hzau.edu.cn/EN/Download.htm
PlantKGA_88	Piperales	Piperaceae	Piper	nigrum	Piper nigrum	black pepper	胡椒	chromosome	Yes	基因	evmmodelPn19772	evmmodelPn197721288xxPlantKGA_88	evm.model.Pn19.772	L	partial	Pn5	27484111	27485455	+	Pfam	PF08263	Leucine rich repeat N-terminal domain	Leucine-rich repeat-containing N-terminal, plant-type	34	72	PSQETALIKFKEGLIDPSNRLESWQLGSDCCSWRGITCD	5.1e-14	MAKLLLLYSYLGFFTLFSINQCLCLDYYHPHCLPSQETALIKFKEGLIDPSNRLESWQLGSDCCSWRGITCDNQTGYVIAMDLHNPQNPYANLPFDEHHKGWLGSLDVSLGFHGRIPPNLVNLSKLEHLDVSSLVHTNATTRSSVVKIVHGVRTSSLSCDNLQWMTSLVSLKVIQMNGVNLSALGPEPMHVFSSLPSLEELGLSLCSLSAPNNITFSNLTSLKFLDHSSNYIASEFPRWVVNMTSLQYLDLSYNYFIGEFMHGLSELPSLQLMYMVHNLVKVNCTKLFAGKWSNIGYLEIDYTDFSGSIPTSIGNTTSLRHLNVMSHPRMRNGLEGNIPQEIGKLKKLKFLSLKFNKFVGKIPPKIINTQFLRSLQLDGVELQSSVKLHWFCQFKFLVD	399	1345	https://www.nature.com/articles/s41467-019-12607-6	http://cotton.hzau.edu.cn/EN/Download.htm
PlantKGA_88	Piperales	Piperaceae	Piper	nigrum	Piper nigrum	black pepper	胡椒	chromosome	Yes	基因	evmmodelPn19772	evmmodelPn197721288xxPlantKGA_88	evm.model.Pn19.772	L	partial	Pn5	27484111	27485455	+	Pfam	PF13855	Leucine rich repeat	Leucine-rich repeat	229	279	SNYIASEFPRWVVNMTSLQYLDLSYNYFIGEFMHGLSELPSLQLMYMVHNL	2.6e-06	MAKLLLLYSYLGFFTLFSINQCLCLDYYHPHCLPSQETALIKFKEGLIDPSNRLESWQLGSDCCSWRGITCDNQTGYVIAMDLHNPQNPYANLPFDEHHKGWLGSLDVSLGFHGRIPPNLVNLSKLEHLDVSSLVHTNATTRSSVVKIVHGVRTSSLSCDNLQWMTSLVSLKVIQMNGVNLSALGPEPMHVFSSLPSLEELGLSLCSLSAPNNITFSNLTSLKFLDHSSNYIASEFPRWVVNMTSLQYLDLSYNYFIGEFMHGLSELPSLQLMYMVHNLVKVNCTKLFAGKWSNIGYLEIDYTDFSGSIPTSIGNTTSLRHLNVMSHPRMRNGLEGNIPQEIGKLKKLKFLSLKFNKFVGKIPPKIINTQFLRSLQLDGVELQSSVKLHWFCQFKFLVD	399	1345	https://www.nature.com/articles/s41467-019-12607-6	http://cotton.hzau.edu.cn/EN/Download.htm
PlantKGA_88	Piperales	Piperaceae	Piper	nigrum	Piper nigrum	black pepper	胡椒	chromosome	Yes	基因	evmmodelPn19776	evmmodelPn197761288xxPlantKGA_88	evm.model.Pn19.776	L	partial	Pn5	27459209	27461907	+	Pfam	PF08263	Leucine rich repeat N-terminal domain	Leucine-rich repeat-containing N-terminal, plant-type	34	72	PSQEAALIKFKEGLIDPSNRHESWQHGSDCCSWRGITCD	1.3e-13	MAKLLLLYSYLSLFTLFSINQCVSLDHDHPHCLPSQEAALIKFKEGLIDPSNRHESWQHGSDCCSWRGITCDNQTGYVSAMDLHNPQNPYASLPFDEHHKGWLASLDVSLGDNTDFSGSIPSSVGNITSLERLNAMSNPRMRNGLEGNVPQEIEKLEKLEFLSLKFNKFVAGNYLNGSIPKSFGNFKAIKQKHAFTEWFPGNDIDGYYKDKLTMTVSGKEDEYSKILFLINYMDFSNNNFSGEIVQELTKLSELLVLNLSQNQLGEHIPGQIGEMKQLLTLNLSHNHLSGEIPSGFQVQTLDDPSIYIGNSELCGFPLKRNCSNSTSWHSPNSLGWSWKDNED	343	2699	https://www.nature.com/articles/s41467-019-12607-6	http://cotton.hzau.edu.cn/EN/Download.htm
PlantKGA_88	Piperales	Piperaceae	Piper	nigrum	Piper nigrum	black pepper	胡椒	chromosome	Yes	基因	evmmodelPn20503	evmmodelPn205031288xxPlantKGA_88	evm.model.Pn20.503	L	partial	Pn15	22068406	22078925	+	Pfam	PF13516	Leucine Rich repeat	Leucine-rich repeat	404	422	PMLQRLDVSDNPVGDDGIR	0.023	MADVPSLLSLCTNTIASELISGGEHDLEALYDLPSDLFQHLLMHLPPLALHNLQGDLSMNSSSDEPCEANRTKFKRKRATFNEDGDFDEAWKVLFESRWPKDASQLCVRCSGGNELDIGCKMASAHGVHWRQKYWEHHIQDCLDEAAETAFLPLFNGCISEIQISENICKFIVFHGWTGSAHTFSKLAGHFQHFGLYARWLRLQNVLCVPEMCELLKDSNLQGLVFRSIKSKIHVDGVRIFLNQNRRTLLSLEFIHCNLPSFFISELFNSLCMNNLCKHNIQYFSIKYSRIFGCNTDVVLRGFSSFLLSARSLHTLVFCESQLGPLFARMIFDVLLESLPDLVTLELSDNYIAGCLSVDGYRLNSCLPSSSDKSIKSLRCLNLRGNNFHAKDVEDLKCV…	632	10520	https://www.nature.com/articles/s41467-019-12607-6	http://cotton.hzau.edu.cn/EN/Download.htm
PlantKGA_88	Piperales	Piperaceae	Piper	nigrum	Piper nigrum	black pepper	胡椒	chromosome	Yes	基因	evmmodelPn20517	evmmodelPn205171288xxPlantKGA_88	evm.model.Pn20.517	L	partial	Pn15	21936358	21946864	+	Pfam	PF13516	Leucine Rich repeat	Leucine-rich repeat	404	422	PMLQRLDVSDNPVGDDGIR	0.023	MADVPSLLSLCTNTIASELISGGEHDLEALYDLPSDLFQHLLMHLPPLALHNLQGDLSMNSSSDEPCEANCTKFKRKRATFNEDGDFDEAWKVLFESRWPKDASQLCVRCSWGNELDIGCKMASAHGVHWRQKYWEHHIQDCLDEAAETAFLPLFNGCISEIQISENICKFIVFHGWTGSAHTFSKLAGHFQHFGLYARWLRLQNVLCVPEMCELLKDSNLQGLVFRSIKSKIHVDGVRIFLNQNRRTLLSLEFIHCNLPSFFISELFNSLCMNNLCKHNIQYFSIKYSRIFGCNTDVVLRGFSSFLLSARSLHTLVFCESQLGPLFARMIFDVLLESLPDLVTLELSDNYIAGCLSVDGYRLNSCLPSSSDKSIKSLRCLNLRGNNFHAKDVEDLKCV…	632	10507	https://www.nature.com/articles/s41467-019-12607-6	http://cotton.hzau.edu.cn/EN/Download.htm
PlantKGA_88	Piperales	Piperaceae	Piper	nigrum	Piper nigrum	black pepper	胡椒	chromosome	Yes	基因	evmmodelPn20593	evmmodelPn205931288xxPlantKGA_88	evm.model.Pn20.593	L	partial	Pn15	21381779	21382441	+	Pfam	PF13855	Leucine rich repeat	Leucine-rich repeat	32	92	RSLQKLVLSDANLTGAIPPQLGDYASLTVLDLSSNGLSGTIPNSLGHLKNLDTLYLNSNQL	1.1e-09	MSFAPPPAISPSWSSNLYRLLSPSLPTSPYLRSLQKLVLSDANLTGAIPPQLGDYASLTVLDLSSNGLSGTIPNSLGHLKNLDTLYLNSNQLTGRIPAQLGDCSALRNLHLYDNRLSGSLPPELGRLRSLEVLRAGGNKEITGRIPPELSNCRSLVVLGLADTKISGSIPASFGQLSKLQTLSIYTTMLTGEIPKEIGNCSELVNLYLYENQLSGSLHRS	220	663	https://www.nature.com/articles/s41467-019-12607-6	http://cotton.hzau.edu.cn/EN/Download.htm
PlantKGA_88	Piperales	Piperaceae	Piper	nigrum	Piper nigrum	black pepper	胡椒	chromosome	Yes	基因	evmmodelPn20781	evmmodelPn207811288xxPlantKGA_88	evm.model.Pn20.781	L	partial	Pn15	19553562	19553837	+	Pfam	PF13855	Leucine rich repeat	Leucine-rich repeat	26	72	RKLRTLNLSRNRLYGLLQDSFKELQHLSYLALSKSSLRILSSALIAL	5e-08	MVSLGSLNLCSNQFSSHNLHKLSDYRKLRTLNLSRNRLYGLLQDSFKELQHLSYLALSKSSLRILSSALIALAHCKLLTRNFKAEVMPTDE	91	276	https://www.nature.com/articles/s41467-019-12607-6	http://cotton.hzau.edu.cn/EN/Download.htm
PlantKGA_88	Piperales	Piperaceae	Piper	nigrum	Piper nigrum	black pepper	胡椒	chromosome	Yes	基因	evmmodelPn20998	evmmodelPn209981288xxPlantKGA_88	evm.model.Pn20.998	L	partial	Pn15	16438635	16439270	+	Pfam	PF13855	Leucine rich repeat	Leucine-rich repeat	118	175	HLQWLDLSRNSFDGIQIPKFFGSFSNLKYLNLSDSGFIGPIPKELGNLSKLEHLDLSN	3.7e-08	MGKYYLITMLAFAVTLYYVLLGSSSEGTKVVDQLGCHAHEKEAFIKFKSGLNDPYNMLHSWDLGEDCCTWRGVACDNQTGYVLGLSLTPSTFINESEIDYWSKYLSGRLDPSLLELKHLQWLDLSRNSFDGIQIPKFFGSFSNLKYLNLSDSGFIGPIPKELGNLSKLEHLDLSNFLYKYRLSTDSLQWLKGMPLLERTINDQLKPISIKW	211	636	https://www.nature.com/articles/s41467-019-12607-6	http://cotton.hzau.edu.cn/EN/Download.htm
PlantKGA_88	Piperales	Piperaceae	Piper	nigrum	Piper nigrum	black pepper	胡椒	chromosome	Yes	基因	evmmodelPn20998	evmmodelPn209981288xxPlantKGA_88	evm.model.Pn20.998	L	partial	Pn15	16438635	16439270	+	Pfam	PF08263	Leucine rich repeat N-terminal domain	Leucine-rich repeat-containing N-terminal, plant-type	38	76	AHEKEAFIKFKSGLNDPYNMLHSWDLGEDCCTWRGVACD	8.4e-12	MGKYYLITMLAFAVTLYYVLLGSSSEGTKVVDQLGCHAHEKEAFIKFKSGLNDPYNMLHSWDLGEDCCTWRGVACDNQTGYVLGLSLTPSTFINESEIDYWSKYLSGRLDPSLLELKHLQWLDLSRNSFDGIQIPKFFGSFSNLKYLNLSDSGFIGPIPKELGNLSKLEHLDLSNFLYKYRLSTDSLQWLKGMPLLERTINDQLKPISIKW	211	636	https://www.nature.com/articles/s41467-019-12607-6	http://cotton.hzau.edu.cn/EN/Download.htm
PlantKGA_88	Piperales	Piperaceae	Piper	nigrum	Piper nigrum	black pepper	胡椒	chromosome	Yes	基因	evmmodelPn20999	evmmodelPn209991288xxPlantKGA_88	evm.model.Pn20.999	L	partial	Pn15	16440728	16445983	+	Pfam	PF00560	Leucine Rich Repeat	Leucine-rich repeat	156	177	LENLDLSNNQFRGEIPPSLSEL	0.33	MLLKTLGSVRILRLQANMFTGKLPSNMSHMVSLQILDLAENKLSGSIPRSIGELLEMTQNHNSVNNLYAYGRPWEFRELETLHNSRPEKSLLSLNGHAIEYDMNLYLVVGINFSSNGLGGEIPQELMRLKRLLFLDLSRNHFTGEIPKNIHELQYLENLDLSNNQFRGEIPPSLSELTFLVKLNLSYNQLQGRIPTGNQLQNMNDSSIYAGNLDLCGAPLPKQCSSNKTVEVEQGRQNGMLGFYMSMALGVVVGFWGSCGLLIFKPSMRILYFKFFDDITEKLVTAILLCIAKLKIRITKTENHEKGKGGDTRGCRQFSRGGDSYNCRPTRESGKLEAPQRLPSAWHLAEETTGRQRQQLVASEVLIGSIWRGARMRVVVHAGRVGRQLGREVWKKSRQ…	428	5256	https://www.nature.com/articles/s41467-019-12607-6	http://cotton.hzau.edu.cn/EN/Download.htm
PlantKGA_88	Piperales	Piperaceae	Piper	nigrum	Piper nigrum	black pepper	胡椒	chromosome	Yes	基因	evmmodelPn211077	evmmodelPn2110771288xxPlantKGA_88	evm.model.Pn21.1077	L	partial	Pn3	2900174	2901601	+	Pfam	PF13855	Leucine rich repeat	Leucine-rich repeat	252	311	NLTYIDLSRNQLKGTVPPSITRLEGLQVLNLSSNHLSGEMPDSIGDLISLRNLSLAGNSI	4.9e-09	MATPFLLLLLLLPATPTSSAAAAAGPNAAPHPSKGRPTPSASVPTASPPSAKSRPNPSAAAPAEAPPPAKPRSTPAAGPAASAPPTKPRPRAAPHTTLDPKQLTALQSLNFPTSPDPCSSPAAACDAATPFRHLLTLRLSNCSDDVQMSSTALQSLSTLHSLSLLHCPSLLPTRLPLPLTSSLTSFSSLGSFRRLTGVWLSRLHNLTSLSVSGVPIAASGPAVFLSAMKRLTNLTVSDTNLTGSLPKRWHLNLTYIDLSRNQLKGTVPPSITRLEGLQVLNLSSNHLSGEMPDSIGDLISLRNLSLAGNSISGPVPDTLASIPHLVHLDLGSNQLNGSIPKFISEMKGLRYLNLARNNFHGLMPFNVSFIERLEVFKVGENSNLCYNHSLISSKLKLGL…	475	1428	https://www.nature.com/articles/s41467-019-12607-6	http://cotton.hzau.edu.cn/EN/Download.htm
PlantKGA_88	Piperales	Piperaceae	Piper	nigrum	Piper nigrum	black pepper	胡椒	chromosome	Yes	基因	evmmodelPn22	evmmodelPn221288xxPlantKGA_88	evm.model.Pn2.2	L	partial	Pn13	378517	379146	+	Pfam	PF08263	Leucine rich repeat N-terminal domain	Leucine-rich repeat-containing N-terminal, plant-type	11	54	ADDVSALLKLKQLLGNSGALAGWVAGGSPCPSVRRRKWTGVICS	9.5e-09	MLQLHVGCVPADDVSALLKLKQLLGNSGALAGWVAGGSPCPSVRRRKWTGVICSNDTEGRVTGLQLENMGLMGLIDVDALLGLDKLRTLSVSGNIFGGPMPNISKLGALRAVYLSRNNFSGVIPSNAFDHMWSLKKVVLSSNQFTGPIPASLVRVPKLVELWLDNNRFTGELPNLQQPNLTVVNFSHNNLGGAVPASLSKFDAGSYAGK	209	630	https://www.nature.com/articles/s41467-019-12607-6	http://cotton.hzau.edu.cn/EN/Download.htm
PlantKGA_88	Piperales	Piperaceae	Piper	nigrum	Piper nigrum	black pepper	胡椒	chromosome	Yes	基因	evmmodelPn22	evmmodelPn221288xxPlantKGA_88	evm.model.Pn2.2	L	partial	Pn13	378517	379146	+	Pfam	PF13516	Leucine Rich repeat	Leucine-rich repeat	178	192	PNLTVVNFSHNNLGG	0.7	MLQLHVGCVPADDVSALLKLKQLLGNSGALAGWVAGGSPCPSVRRRKWTGVICSNDTEGRVTGLQLENMGLMGLIDVDALLGLDKLRTLSVSGNIFGGPMPNISKLGALRAVYLSRNNFSGVIPSNAFDHMWSLKKVVLSSNQFTGPIPASLVRVPKLVELWLDNNRFTGELPNLQQPNLTVVNFSHNNLGGAVPASLSKFDAGSYAGK	209	630	https://www.nature.com/articles/s41467-019-12607-6	http://cotton.hzau.edu.cn/EN/Download.htm
PlantKGA_88	Piperales	Piperaceae	Piper	nigrum	Piper nigrum	black pepper	胡椒	chromosome	Yes	基因	evmmodelPn22	evmmodelPn221288xxPlantKGA_88	evm.model.Pn2.2	L	partial	Pn13	378517	379146	+	Pfam	PF13855	Leucine rich repeat	Leucine-rich repeat	109	168	LRAVYLSRNNFSGVIPSNAFDHMWSLKKVVLSSNQFTGPIPASLVRVPKLVELWLDNNRF	2.7e-07	MLQLHVGCVPADDVSALLKLKQLLGNSGALAGWVAGGSPCPSVRRRKWTGVICSNDTEGRVTGLQLENMGLMGLIDVDALLGLDKLRTLSVSGNIFGGPMPNISKLGALRAVYLSRNNFSGVIPSNAFDHMWSLKKVVLSSNQFTGPIPASLVRVPKLVELWLDNNRFTGELPNLQQPNLTVVNFSHNNLGGAVPASLSKFDAGSYAGK	209	630	https://www.nature.com/articles/s41467-019-12607-6	http://cotton.hzau.edu.cn/EN/Download.htm
PlantKGA_88	Piperales	Piperaceae	Piper	nigrum	Piper nigrum	black pepper	胡椒	chromosome	Yes	基因	evmmodelPn2200	evmmodelPn22001288xxPlantKGA_88	evm.model.Pn2.200	L	partial	Pn23	4329915	4331189	+	Pfam	PF08263	Leucine rich repeat N-terminal domain	Leucine-rich repeat-containing N-terminal, plant-type	6	47	DTDRAALLQFKAAIGSSGSSSDHVLSSWNETTHFCNWAGITC	2.2e-12	MLLSNDTDRAALLQFKAAIGSSGSSSDHVLSSWNETTHFCNWAGITCGRRHRRVRHIDLHGLGLEGTISPYLGNLSFLRGINLNHNKFHGQIPPQLGLLHRLEHLNLSYNSLSANYLNGQIPHSLGRMKGLEVLSLSGNSLFGTIPLSIYNLSFLEDFYITQNQLHGNLPMNMGLVLRNLKVFLASSNLLVGSVPVSLSNASQLQIFEIGDNKFSGKVPSNIGSLRYLTRLHLGRLSSISNLSSQLEILDLSQNSFYGDLPTNIGNLVGLQFLTLDINLLTGNIPPGIGMLSQLEILSLSRKNFKEEFHPLFATEAACLNYS	322	1275	https://www.nature.com/articles/s41467-019-12607-6	http://cotton.hzau.edu.cn/EN/Download.htm
PlantKGA_88	Piperales	Piperaceae	Piper	nigrum	Piper nigrum	black pepper	胡椒	chromosome	Yes	基因	evmmodelPn2202	evmmodelPn22021288xxPlantKGA_88	evm.model.Pn2.202	L	partial	Pn23	4307148	4309469	+	Pfam	PF00560	Leucine Rich Repeat	Leucine-rich repeat	376	397	QLQTLYLSHNKLQGGIPPSICN	0.21	MDVVQYACFLLCFFSTSNLLSSEALFLSNDTERAALLQFKAAIGSSGSSSDHVLSSWNETTHFCNWDGITCGRRHQRVRLIDLHGLGLEGTISPYLGNLSFLRRTNLKHNKFHGEIPPQLGLLHRLEHLSLSDNSLAGQIPINISRCLNLRVLTLDNNQLLEANNLTGEIPSSLGRMKGLKGLVLESNSLIGRIPPSVYNISSLATIILAENQLQGNLPMNMGLALPNLERFLASYNGFVGPVPVSLSNASRLQWFEIGYNNFSGNVPPKIASLRYLTRLHLGSNHLGNDDDLSFLDSLSNCSQLRYLTLFNDSFTGRLSSISNLSSQLVFLDLSQNSFYGDLPTNVGNMVRLPFLGLAANLLTGNIPPGIGMLSQLQTLYLSHNKLQGGIPPSICNGS…	730	2322	https://www.nature.com/articles/s41467-019-12607-6	http://cotton.hzau.edu.cn/EN/Download.htm
PlantKGA_88	Piperales	Piperaceae	Piper	nigrum	Piper nigrum	black pepper	胡椒	chromosome	Yes	基因	evmmodelPn2202	evmmodelPn22021288xxPlantKGA_88	evm.model.Pn2.202	L	partial	Pn23	4307148	4309469	+	Pfam	PF08263	Leucine rich repeat N-terminal domain	Leucine-rich repeat-containing N-terminal, plant-type	30	71	DTERAALLQFKAAIGSSGSSSDHVLSSWNETTHFCNWDGITC	7.3e-12	MDVVQYACFLLCFFSTSNLLSSEALFLSNDTERAALLQFKAAIGSSGSSSDHVLSSWNETTHFCNWDGITCGRRHQRVRLIDLHGLGLEGTISPYLGNLSFLRRTNLKHNKFHGEIPPQLGLLHRLEHLSLSDNSLAGQIPINISRCLNLRVLTLDNNQLLEANNLTGEIPSSLGRMKGLKGLVLESNSLIGRIPPSVYNISSLATIILAENQLQGNLPMNMGLALPNLERFLASYNGFVGPVPVSLSNASRLQWFEIGYNNFSGNVPPKIASLRYLTRLHLGSNHLGNDDDLSFLDSLSNCSQLRYLTLFNDSFTGRLSSISNLSSQLVFLDLSQNSFYGDLPTNVGNMVRLPFLGLAANLLTGNIPPGIGMLSQLQTLYLSHNKLQGGIPPSICNGS…	730	2322	https://www.nature.com/articles/s41467-019-12607-6	http://cotton.hzau.edu.cn/EN/Download.htm
PlantKGA_88	Piperales	Piperaceae	Piper	nigrum	Piper nigrum	black pepper	胡椒	chromosome	Yes	基因	evmmodelPn2202	evmmodelPn22021288xxPlantKGA_88	evm.model.Pn2.202	L	partial	Pn23	4307148	4309469	+	Pfam	PF13855	Leucine rich repeat	Leucine-rich repeat	497	556	SLEGLYLQRNFFQGSIPMTLGSVKNLQEIDLSHNNLSGPIPDFIGDLKSLESLNLSFNNF	8.4e-09	MDVVQYACFLLCFFSTSNLLSSEALFLSNDTERAALLQFKAAIGSSGSSSDHVLSSWNETTHFCNWDGITCGRRHQRVRLIDLHGLGLEGTISPYLGNLSFLRRTNLKHNKFHGEIPPQLGLLHRLEHLSLSDNSLAGQIPINISRCLNLRVLTLDNNQLLEANNLTGEIPSSLGRMKGLKGLVLESNSLIGRIPPSVYNISSLATIILAENQLQGNLPMNMGLALPNLERFLASYNGFVGPVPVSLSNASRLQWFEIGYNNFSGNVPPKIASLRYLTRLHLGSNHLGNDDDLSFLDSLSNCSQLRYLTLFNDSFTGRLSSISNLSSQLVFLDLSQNSFYGDLPTNVGNMVRLPFLGLAANLLTGNIPPGIGMLSQLQTLYLSHNKLQGGIPPSICNGS…	730	2322	https://www.nature.com/articles/s41467-019-12607-6	http://cotton.hzau.edu.cn/EN/Download.htm
PlantKGA_88	Piperales	Piperaceae	Piper	nigrum	Piper nigrum	black pepper	胡椒	chromosome	Yes	基因	evmmodelPn2208	evmmodelPn22081288xxPlantKGA_88	evm.model.Pn2.208	L	partial	Pn23	4156625	4158550	+	Pfam	PF08263	Leucine rich repeat N-terminal domain	Leucine-rich repeat-containing N-terminal, plant-type	6	47	DTDRAALLQFKAAIGSSGSSSDHVLSSWNETTHFCNWAGITC	4.5e-12	MLLSNDTDRAALLQFKAAIGSSGSSSDHVLSSWNETTHFCNWAGITCGRRHRRVRLIDLHGLGLEGTISPYLGNLSFLRGINLNHNKFHGQIPPQLGLLHRLEHLNLSYNSLSANYLNGQIPHSLGRMKGLEVLSLSGNSLFGTIPLSIYNLSFLEDFYITQNQLHGNLPMNMGLVLRNLKVFLASSNLLVGSVPVSLSNASQLQIFEIGDNKFSGKVPSNMGSLRYLTRLHLGRLSSISNLSSQLEILDLSQNSFYGDLPTNIGNLVGLQFLTLDINLLTGNIPPGIGMLSQLEILSLSRNKLQGGIPPSICNGSNLLKLFLAENNLEGSIPSSIAKCKRLLTLKIGGNNLHGSITKELFKISSLSIFLDISDNFLNGSLPIEVSNLKNLGILNANNN…	539	1926	https://www.nature.com/articles/s41467-019-12607-6	http://cotton.hzau.edu.cn/EN/Download.htm
PlantKGA_88	Piperales	Piperaceae	Piper	nigrum	Piper nigrum	black pepper	胡椒	chromosome	Yes	基因	evmmodelPn24313	evmmodelPn243131288xxPlantKGA_88	evm.model.Pn24.313	L	partial	Pn15	2189443	2192412	-	Pfam	PF13516	Leucine Rich repeat	Leucine-rich repeat	137	159	HNLRLLDVSYCRKVTDKGLGAVA	0.15	MSALSSPAAGDDSTTVAVCINEFLEDDMLGAVLARLPSEDKDAFGLVCKRWLLVRNYDRRRLCARAGPLMLRRLAARFTRLLELDLSQSVSRSFYPGVTDDDLAVVASGFVFLQALRLQNCKGITDSGLKAVGEGLHNLRLLDVSYCRKVTDKGLGAVAGGCPSLKSLHVSGCKLLTNTFLVSLAKSCCDLEELVLYGCFNITDEGIENLVCGCNRIKILDLNKCIKVGNFGVAKISQFCSSTLKVLKLMDCRRVGDESVYALAQNCNSIETLVIGGCRDVSDESVKSLAKLCGSTLKRLKMDWCPNISDSSVKFLFMHCECLEALDIGCCTEVSDAAFFILETVRAQLHLRMLKVSGCPKITVAGIHSLAQFCKFLEYLDVTSCPFISRESCIEARLE…	423	2970	https://www.nature.com/articles/s41467-019-12607-6	http://cotton.hzau.edu.cn/EN/Download.htm
PlantKGA_88	Piperales	Piperaceae	Piper	nigrum	Piper nigrum	black pepper	胡椒	chromosome	Yes	基因	evmmodelPn24313	evmmodelPn243131288xxPlantKGA_88	evm.model.Pn24.313	L	partial	Pn15	2189443	2192412	-	Pfam	PF13516	Leucine Rich repeat	Leucine-rich repeat	162	178	CPSLKSLHVSGCKLLTN	1.4	MSALSSPAAGDDSTTVAVCINEFLEDDMLGAVLARLPSEDKDAFGLVCKRWLLVRNYDRRRLCARAGPLMLRRLAARFTRLLELDLSQSVSRSFYPGVTDDDLAVVASGFVFLQALRLQNCKGITDSGLKAVGEGLHNLRLLDVSYCRKVTDKGLGAVAGGCPSLKSLHVSGCKLLTNTFLVSLAKSCCDLEELVLYGCFNITDEGIENLVCGCNRIKILDLNKCIKVGNFGVAKISQFCSSTLKVLKLMDCRRVGDESVYALAQNCNSIETLVIGGCRDVSDESVKSLAKLCGSTLKRLKMDWCPNISDSSVKFLFMHCECLEALDIGCCTEVSDAAFFILETVRAQLHLRMLKVSGCPKITVAGIHSLAQFCKFLEYLDVTSCPFISRESCIEARLE…	423	2970	https://www.nature.com/articles/s41467-019-12607-6	http://cotton.hzau.edu.cn/EN/Download.htm
PlantKGA_88	Piperales	Piperaceae	Piper	nigrum	Piper nigrum	black pepper	胡椒	chromosome	Yes	基因	evmmodelPn24313	evmmodelPn243131288xxPlantKGA_88	evm.model.Pn24.313	L	partial	Pn15	2189443	2192412	-	Pfam	PF13516	Leucine Rich repeat	Leucine-rich repeat	113	132	LQALRLQNCKGITDSGLKAV	0.33	MSALSSPAAGDDSTTVAVCINEFLEDDMLGAVLARLPSEDKDAFGLVCKRWLLVRNYDRRRLCARAGPLMLRRLAARFTRLLELDLSQSVSRSFYPGVTDDDLAVVASGFVFLQALRLQNCKGITDSGLKAVGEGLHNLRLLDVSYCRKVTDKGLGAVAGGCPSLKSLHVSGCKLLTNTFLVSLAKSCCDLEELVLYGCFNITDEGIENLVCGCNRIKILDLNKCIKVGNFGVAKISQFCSSTLKVLKLMDCRRVGDESVYALAQNCNSIETLVIGGCRDVSDESVKSLAKLCGSTLKRLKMDWCPNISDSSVKFLFMHCECLEALDIGCCTEVSDAAFFILETVRAQLHLRMLKVSGCPKITVAGIHSLAQFCKFLEYLDVTSCPFISRESCIEARLE…	423	2970	https://www.nature.com/articles/s41467-019-12607-6	http://cotton.hzau.edu.cn/EN/Download.htm
PlantKGA_88	Piperales	Piperaceae	Piper	nigrum	Piper nigrum	black pepper	胡椒	chromosome	Yes	基因	evmmodelPn24313	evmmodelPn243131288xxPlantKGA_88	evm.model.Pn24.313	L	partial	Pn15	2189443	2192412	-	Pfam	PF13516	Leucine Rich repeat	Leucine-rich repeat	241	264	SSTLKVLKLMDCRRVGDESVYALA	0.071	MSALSSPAAGDDSTTVAVCINEFLEDDMLGAVLARLPSEDKDAFGLVCKRWLLVRNYDRRRLCARAGPLMLRRLAARFTRLLELDLSQSVSRSFYPGVTDDDLAVVASGFVFLQALRLQNCKGITDSGLKAVGEGLHNLRLLDVSYCRKVTDKGLGAVAGGCPSLKSLHVSGCKLLTNTFLVSLAKSCCDLEELVLYGCFNITDEGIENLVCGCNRIKILDLNKCIKVGNFGVAKISQFCSSTLKVLKLMDCRRVGDESVYALAQNCNSIETLVIGGCRDVSDESVKSLAKLCGSTLKRLKMDWCPNISDSSVKFLFMHCECLEALDIGCCTEVSDAAFFILETVRAQLHLRMLKVSGCPKITVAGIHSLAQFCKFLEYLDVTSCPFISRESCIEARLE…	423	2970	https://www.nature.com/articles/s41467-019-12607-6	http://cotton.hzau.edu.cn/EN/Download.htm
PlantKGA_88	Piperales	Piperaceae	Piper	nigrum	Piper nigrum	black pepper	胡椒	chromosome	Yes	基因	evmmodelPn24382	evmmodelPn243821288xxPlantKGA_88	evm.model.Pn24.382	L	partial	Pn15	2566594	2566902	-	Pfam	PF13855	Leucine rich repeat	Leucine-rich repeat	26	88	RKLRTLDLSRNRLNGLLPDSFKELQRLSYFALSASGLSNLSAALMVLEQCTNLTTLVLSGNNF	2.2e-08	MASMYSLDLGSNQFTGRKLHEHSRCRKLRTLDLSRNRLNGLLPDSFKELQRLSYFALSASGLSNLSAALMVLEQCTNLTTLVLSGNNFYNEVMPMEGIKAGF	102	309	https://www.nature.com/articles/s41467-019-12607-6	http://cotton.hzau.edu.cn/EN/Download.htm
PlantKGA_88	Piperales	Piperaceae	Piper	nigrum	Piper nigrum	black pepper	胡椒	chromosome	Yes	基因	evmmodelPn24384	evmmodelPn243841288xxPlantKGA_88	evm.model.Pn24.384	L	partial	Pn15	2569517	2572654	+	Pfam	PF13855	Leucine rich repeat	Leucine-rich repeat	152	211	QLVLLDLSFNEFEGAIPDVFINLQKLEYFSAQSNRFRGSLPVTLSNLSSIVLLDLSNNHL	9.6e-07	MSIYVFNLVQITLEACPQRRGEVCLVGAVIMLVVMIVATGQVSNVQTFLPVNPEPRAVEVDLSNKSLTGISSSICNNSPELTHLDLSNNSLSGNIPTGFSNCRFLSHLLLSSNSLTGKLPEDLFDIFSLKQLSLGKNKLSGPLSSKLGKLSQLVLLDLSFNEFEGAIPDVFINLQKLEYFSAQSNRFRGSLPVTLSNLSSIVLLDLSNNHLGGQIGIVCSELPRLKLVNLGSNPLESDLAHFSQCKELRFLSLAGNKLKVPITNSIQSLQSLTYLSLVDTGLRNMPSTLKILQNLKNLSTLVLNENFLGESMPTAGIDGFMSIKKLALSNCQLFGSIPDWLKKFTRLNALDLSGNMLSGKIPGWLGNFSRYLKYLDLSNNSLSGEIPKSLTNLRMEYEQ…	583	3138	https://www.nature.com/articles/s41467-019-12607-6	http://cotton.hzau.edu.cn/EN/Download.htm
PlantKGA_88	Piperales	Piperaceae	Piper	nigrum	Piper nigrum	black pepper	胡椒	chromosome	Yes	基因	evmmodelPn24384	evmmodelPn243841288xxPlantKGA_88	evm.model.Pn24.384	L	partial	Pn15	2569517	2572654	+	Pfam	PF13855	Leucine rich repeat	Leucine-rich repeat	59	115	EVDLSNKSLTGISSSICNNSPELTHLDLSNNSLSGNIPTGFSNCRFLSHLLLSSNSL	8.2e-07	MSIYVFNLVQITLEACPQRRGEVCLVGAVIMLVVMIVATGQVSNVQTFLPVNPEPRAVEVDLSNKSLTGISSSICNNSPELTHLDLSNNSLSGNIPTGFSNCRFLSHLLLSSNSLTGKLPEDLFDIFSLKQLSLGKNKLSGPLSSKLGKLSQLVLLDLSFNEFEGAIPDVFINLQKLEYFSAQSNRFRGSLPVTLSNLSSIVLLDLSNNHLGGQIGIVCSELPRLKLVNLGSNPLESDLAHFSQCKELRFLSLAGNKLKVPITNSIQSLQSLTYLSLVDTGLRNMPSTLKILQNLKNLSTLVLNENFLGESMPTAGIDGFMSIKKLALSNCQLFGSIPDWLKKFTRLNALDLSGNMLSGKIPGWLGNFSRYLKYLDLSNNSLSGEIPKSLTNLRMEYEQ…	583	3138	https://www.nature.com/articles/s41467-019-12607-6	http://cotton.hzau.edu.cn/EN/Download.htm
PlantKGA_88	Piperales	Piperaceae	Piper	nigrum	Piper nigrum	black pepper	胡椒	chromosome	Yes	基因	evmmodelPn24384	evmmodelPn243841288xxPlantKGA_88	evm.model.Pn24.384	L	partial	Pn15	2569517	2572654	+	Pfam	PF00560	Leucine Rich Repeat	Leucine-rich repeat	372	393	LKYLDLSNNSLSGEIPKSLTNL	0.021	MSIYVFNLVQITLEACPQRRGEVCLVGAVIMLVVMIVATGQVSNVQTFLPVNPEPRAVEVDLSNKSLTGISSSICNNSPELTHLDLSNNSLSGNIPTGFSNCRFLSHLLLSSNSLTGKLPEDLFDIFSLKQLSLGKNKLSGPLSSKLGKLSQLVLLDLSFNEFEGAIPDVFINLQKLEYFSAQSNRFRGSLPVTLSNLSSIVLLDLSNNHLGGQIGIVCSELPRLKLVNLGSNPLESDLAHFSQCKELRFLSLAGNKLKVPITNSIQSLQSLTYLSLVDTGLRNMPSTLKILQNLKNLSTLVLNENFLGESMPTAGIDGFMSIKKLALSNCQLFGSIPDWLKKFTRLNALDLSGNMLSGKIPGWLGNFSRYLKYLDLSNNSLSGEIPKSLTNLRMEYEQ…	583	3138	https://www.nature.com/articles/s41467-019-12607-6	http://cotton.hzau.edu.cn/EN/Download.htm
PlantKGA_88	Piperales	Piperaceae	Piper	nigrum	Piper nigrum	black pepper	胡椒	chromosome	Yes	基因	evmmodelPn24494	evmmodelPn244941288xxPlantKGA_88	evm.model.Pn24.494	L	partial	Pn15	3345002	3345322	-	Pfam	PF08263	Leucine rich repeat N-terminal domain	Leucine-rich repeat-containing N-terminal, plant-type	46	85	HPDRETLFKLKQSLLGPRGAGLGGWTPATTDCSFAGVICS	3.6e-07	MEGRKDFFSSCSTVIVVALLLLFLLSFSFTASGDGDGGVDGGPLHHPDRETLFKLKQSLLGPRGAGLGGWTPATTDCSFAGVICSDDSRVVALNVSFLPLFGAISP	106	321	https://www.nature.com/articles/s41467-019-12607-6	http://cotton.hzau.edu.cn/EN/Download.htm
PlantKGA_88	Piperales	Piperaceae	Piper	nigrum	Piper nigrum	black pepper	胡椒	chromosome	Yes	基因	evmmodelPn24728	evmmodelPn247281288xxPlantKGA_88	evm.model.Pn24.728	L	partial	Pn15	5392112	5393236	+	Pfam	PF00560	Leucine Rich Repeat	Leucine-rich repeat	309	330	NLKTLDLSGSKMGGKIPPSLCN	0.3	MGVSCGRRHQRVTRLELSFMGLGGTLSPHIGNLSFLSLISIEGNYLQGAIPSEIGHLSRLQGLFLSYNSFGGEIPLNLTNCLSIRKIDLIGNQLVGKIPGQFGLLSKLRKLHLASNLLTGSIPPSLGNLSSLRELFLGSNNFDGILPLELGSLKSMASFHVGSNQISGSIPDSISNVSSIKYFRIENNKLSGKLPTKLGTELLPNLEYFFVDSNKLQGQIPVSLANASNLAYLYMSHNRFSGFMPDFGRSCYKLQRLELRSNQLGCGGTTDDFRFLASLANCTNLELLALGDNRLVIEMIPDVIGKLTNLKTLDLSGSKMGGKIPPSLCNISMLAGLYLGNNELVDAVPGCLGDLEDLRELDISGNKLESSMSY	374	1125	https://www.nature.com/articles/s41467-019-12607-6	http://cotton.hzau.edu.cn/EN/Download.htm
PlantKGA_88	Piperales	Piperaceae	Piper	nigrum	Piper nigrum	black pepper	胡椒	chromosome	Yes	基因	evmmodelPn24728	evmmodelPn247281288xxPlantKGA_88	evm.model.Pn24.728	L	partial	Pn15	5392112	5393236	+	Pfam	PF13855	Leucine rich repeat	Leucine-rich repeat	204	264	PNLEYFFVDSNKLQGQIPVSLANASNLAYLYMSHNRFSGFMPDFGRSCYKLQRLELRSNQL	2.3e-06	MGVSCGRRHQRVTRLELSFMGLGGTLSPHIGNLSFLSLISIEGNYLQGAIPSEIGHLSRLQGLFLSYNSFGGEIPLNLTNCLSIRKIDLIGNQLVGKIPGQFGLLSKLRKLHLASNLLTGSIPPSLGNLSSLRELFLGSNNFDGILPLELGSLKSMASFHVGSNQISGSIPDSISNVSSIKYFRIENNKLSGKLPTKLGTELLPNLEYFFVDSNKLQGQIPVSLANASNLAYLYMSHNRFSGFMPDFGRSCYKLQRLELRSNQLGCGGTTDDFRFLASLANCTNLELLALGDNRLVIEMIPDVIGKLTNLKTLDLSGSKMGGKIPPSLCNISMLAGLYLGNNELVDAVPGCLGDLEDLRELDISGNKLESSMSY	374	1125	https://www.nature.com/articles/s41467-019-12607-6	http://cotton.hzau.edu.cn/EN/Download.htm
PlantKGA_88	Piperales	Piperaceae	Piper	nigrum	Piper nigrum	black pepper	胡椒	chromosome	Yes	基因	evmmodelPn24728	evmmodelPn247281288xxPlantKGA_88	evm.model.Pn24.728	L	partial	Pn15	5392112	5393236	+	Pfam	PF13855	Leucine rich repeat	Leucine-rich repeat	84	142	IRKIDLIGNQLVGKIPGQFGLLSKLRKLHLASNLLTGSIPPSLGNLSSLRELFLGSNNF	6.4e-07	MGVSCGRRHQRVTRLELSFMGLGGTLSPHIGNLSFLSLISIEGNYLQGAIPSEIGHLSRLQGLFLSYNSFGGEIPLNLTNCLSIRKIDLIGNQLVGKIPGQFGLLSKLRKLHLASNLLTGSIPPSLGNLSSLRELFLGSNNFDGILPLELGSLKSMASFHVGSNQISGSIPDSISNVSSIKYFRIENNKLSGKLPTKLGTELLPNLEYFFVDSNKLQGQIPVSLANASNLAYLYMSHNRFSGFMPDFGRSCYKLQRLELRSNQLGCGGTTDDFRFLASLANCTNLELLALGDNRLVIEMIPDVIGKLTNLKTLDLSGSKMGGKIPPSLCNISMLAGLYLGNNELVDAVPGCLGDLEDLRELDISGNKLESSMSY	374	1125	https://www.nature.com/articles/s41467-019-12607-6	http://cotton.hzau.edu.cn/EN/Download.htm
PlantKGA_88	Piperales	Piperaceae	Piper	nigrum	Piper nigrum	black pepper	胡椒	chromosome	Yes	基因	evmmodelPn25212	evmmodelPn252121288xxPlantKGA_88	evm.model.Pn25.212	L	partial	Pn20	19685930	19689769	+	Pfam	PF13855	Leucine rich repeat	Leucine-rich repeat	177	235	LKELRLAHNEITALPAELARNSKIEIIDLGDNLITKWSDIEVLSSLSSLKNLNLLGNPI	1.1e-06	MSSLSSNQVLEESREADFPSITSLHLSHRALSNVSCLVDFPNLTKLDLRGNNLTSLQGLRSCANLTWLSVVENKLDNLKGVEGLLKLKVLNAGRNRLVSICEVNLLINLQALILNDNKISSINGLEKLKQLNTLVASRNPICDIGDSIRRIKSLSKLSLSKCQVKVIGCSLKYCLDLKELRLAHNEITALPAELARNSKIEIIDLGDNLITKWSDIEVLSSLSSLKNLNLLGNPISEQDKLVKKIKKLVPSLQILNAKPMETELKRSRRHHKTDTQAATGLVREEPIANKKVPFSGIHEHHTGADPMLQEKQVELTDAKIEKEPKARKEGKKNKQKDLGPNKSAGIDDSEIPFVDLILSENVGNLQESGQKRKNRETSKDAKSISGLISISYSKNKSAK…	427	3840	https://www.nature.com/articles/s41467-019-12607-6	http://cotton.hzau.edu.cn/EN/Download.htm
PlantKGA_88	Piperales	Piperaceae	Piper	nigrum	Piper nigrum	black pepper	胡椒	chromosome	Yes	基因	evmmodelPn26310	evmmodelPn263101288xxPlantKGA_88	evm.model.Pn26.310	L	partial	Pn5	12395210	12395644	+	Pfam	PF08263	Leucine rich repeat N-terminal domain	Leucine-rich repeat-containing N-terminal, plant-type	28	67	NTDGSLLLSLKYYSLSDPLSALSSWNYSDPSPCSWNGVVC	8.2e-11	MNPAAAVLLLLLLLHLHHHHLRRGAALNTDGSLLLSLKYYSLSDPLSALSSWNYSDPSPCSWNGVVCAAVDDDSTGHVVALLLPGAAIAGLLPPDLVLVQHLRHLDLSGNSLDGPLPAAQLFRNTSELRILNLAGNLPHRPVAT	144	435	https://www.nature.com/articles/s41467-019-12607-6	http://cotton.hzau.edu.cn/EN/Download.htm
PlantKGA_88	Piperales	Piperaceae	Piper	nigrum	Piper nigrum	black pepper	胡椒	chromosome	Yes	基因	evmmodelPn26310	evmmodelPn263101288xxPlantKGA_88	evm.model.Pn26.310	L	partial	Pn5	12395210	12395644	+	Pfam	PF00560	Leucine Rich Repeat	Leucine-rich repeat	101	118	HLRHLDLSGNSLDGPLPA	0.022	MNPAAAVLLLLLLLHLHHHHLRRGAALNTDGSLLLSLKYYSLSDPLSALSSWNYSDPSPCSWNGVVCAAVDDDSTGHVVALLLPGAAIAGLLPPDLVLVQHLRHLDLSGNSLDGPLPAAQLFRNTSELRILNLAGNLPHRPVAT	144	435	https://www.nature.com/articles/s41467-019-12607-6	http://cotton.hzau.edu.cn/EN/Download.htm
PlantKGA_88	Piperales	Piperaceae	Piper	nigrum	Piper nigrum	black pepper	胡椒	chromosome	Yes	基因	evmmodelPn26643	evmmodelPn266431288xxPlantKGA_88	evm.model.Pn26.643	L	partial	Pn5	7663802	7664938	+	Pfam	PF08263	Leucine rich repeat N-terminal domain	Leucine-rich repeat-containing N-terminal, plant-type	124	166	SPDGLSLLALKSVVDVDFPNAGEPFPDWNLSDADPCNWSGVAC	6.8e-09	MDVLPPLPPQTPLSPNLVAIAPPSPNLSCVPSQSIPLLSSQYPTPPRFSPSLLQLPPLPHLVGRVGTWSHQSSSYTKSPPLQKKKHTALLYRRRRPSPSPFLMKVFLFLLQCILLPPWLATSLSPDGLSLLALKSVVDVDFPNAGEPFPDWNLSDADPCNWSGVACEVIEGCPRVVSVSVTGMGLRGYIPSELGSLVYPSRLNLCGNCFSGPIPYHLFHAAALRSLFPSDNSLTGPVPAAFFSLPHLQNLDLSRNALSGELPFAFVDCCPAAAGIRSLRRRWRRQGGCGTRTW	293	1137	https://www.nature.com/articles/s41467-019-12607-6	http://cotton.hzau.edu.cn/EN/Download.htm
PlantKGA_88	Piperales	Piperaceae	Piper	nigrum	Piper nigrum	black pepper	胡椒	chromosome	Yes	基因	evmmodelPn28131	evmmodelPn281311288xxPlantKGA_88	evm.model.Pn28.131	L	partial	Pn5	3385602	3392118	-	Pfam	PF08263	Leucine rich repeat N-terminal domain	Leucine-rich repeat-containing N-terminal, plant-type	337	373	DVTALDGLKKNLQNVPLDWNGDPCFPEEFTWTGVTCS	0.00011	FFIDCGGAEPTVIAGRRYVPDASFISVGTPKVLPIPPFDPILATARSFPIDRHRKFCFNVPVYRSGKYLVRTTFFYGRLNGPSSPPVFDQMVDGTMWSVVNTTEDYFRGEATYYEGVFPAKGKTMSICLGKNSLTDSDLFINVLELVLLGNSLYNTTAFDKHALAMVARHAFGYNNGFPLRFPEDPFDRLWQPFTGSNLVSTVSSKSNVSVSGFWNIPPAKVFDAALSFNQSEPFELQWPNFPLSNSSYYIALYFVEHQDFPSDESRLLDITINGFPYYRNLNVTKSGAAVFATEWPLAGLTKLVLAPAVGSRSAPLINAGEVFHILKLGGRTKTRDVTALDGLKKNLQNVPLDWNGDPCFPEEFTWTGVTCSGGLDGRIVALNLTDMGLSGFLSRSIA…	485	6517	https://www.nature.com/articles/s41467-019-12607-6	http://cotton.hzau.edu.cn/EN/Download.htm
PlantKGA_88	Piperales	Piperaceae	Piper	nigrum	Piper nigrum	black pepper	胡椒	chromosome	Yes	基因	evmmodelPn28208	evmmodelPn282081288xxPlantKGA_88	evm.model.Pn28.208	L	partial	Pn5	2868774	2870877	+	Pfam	PF13855	Leucine rich repeat	Leucine-rich repeat	126	186	PSLRIINLSRNQSGSQLRDAFGALSDLLTLDLSSNKFTGDLPQGFRSLSSITTMNLQNNQF	2.9e-09	MMMQILRIIICISAWKLAFVHGTTDQDDVMALRRMYQSLNLAPQLTNWNSNGDDPCGQSWKGITCSGSAVTEINLSSLGLSGSLDYWLSNLDLSNNNLNGQLPYSLPPKIQELFSGSLPYLFNQMPSLRIINLSRNQSGSQLRDAFGALSDLLTLDLSSNKFTGDLPQGFRSLSSITTMNLQNNQFTGHIDVLANLPLQNLNVANNRFTG	210	2104	https://www.nature.com/articles/s41467-019-12607-6	http://cotton.hzau.edu.cn/EN/Download.htm
PlantKGA_88	Piperales	Piperaceae	Piper	nigrum	Piper nigrum	black pepper	胡椒	chromosome	Yes	基因	evmmodelPn28208	evmmodelPn282081288xxPlantKGA_88	evm.model.Pn28.208	L	partial	Pn5	2868774	2870877	+	Pfam	PF08263	Leucine rich repeat N-terminal domain	Leucine-rich repeat-containing N-terminal, plant-type	26	66	QDDVMALRRMYQSLNLAPQLTNWNSNGDDPCGQSWKGITCS	5.4e-10	MMMQILRIIICISAWKLAFVHGTTDQDDVMALRRMYQSLNLAPQLTNWNSNGDDPCGQSWKGITCSGSAVTEINLSSLGLSGSLDYWLSNLDLSNNNLNGQLPYSLPPKIQELFSGSLPYLFNQMPSLRIINLSRNQSGSQLRDAFGALSDLLTLDLSSNKFTGDLPQGFRSLSSITTMNLQNNQFTGHIDVLANLPLQNLNVANNRFTG	210	2104	https://www.nature.com/articles/s41467-019-12607-6	http://cotton.hzau.edu.cn/EN/Download.htm
PlantKGA_88	Piperales	Piperaceae	Piper	nigrum	Piper nigrum	black pepper	胡椒	chromosome	Yes	基因	evmmodelPn28271	evmmodelPn282711288xxPlantKGA_88	evm.model.Pn28.271	L	partial	Pn5	2466568	2469216	-	Pfam	PF13516	Leucine Rich repeat	Leucine-rich repeat	173	196	CPSLQRLNLSCCLGISDTGIDLLA	0.015	MTARLPRTLLSLSDDLLLIILDCLPHDSDRRSWRLVCTLFLLLESRHRRSLAVRCRELLLPLVCLRYPLLHRLDLSRCPGVDDRALVLAFSQPGSLPLRALNLSSAFSVTFRGLAAAVRACPLLQEIDVSNCWRLGDREVAAISGAAAGLTSLNMARCLAVTDVGLAKVAVGCPSLQRLNLSCCLGISDTGIDLLAKKCMDLKFLDISYLRITVYSLRQISALRKLEALIVIGCMSIDDKGLEFFNTNHSSLLVISLHWRCLFIFSTRWLKDMVYLKSLKLDGIRVSSPTLSAISKNCRALTDVGLGKCIGVTDDGVAALVTEKLKTLDLTCCYLVTDNSIIAVANTCHKLTSLKLESCTKITEIGWHKIGTHCTALQELDLTDTFLNDTGLRSLSECS…	624	2649	https://www.nature.com/articles/s41467-019-12607-6	http://cotton.hzau.edu.cn/EN/Download.htm
PlantKGA_88	Piperales	Piperaceae	Piper	nigrum	Piper nigrum	black pepper	胡椒	chromosome	Yes	基因	evmmodelPn28271	evmmodelPn282711288xxPlantKGA_88	evm.model.Pn28.271	L	partial	Pn5	2466568	2469216	-	Pfam	PF13516	Leucine Rich repeat	Leucine-rich repeat	450	473	CRKLQKLNISYCQGVTDASLMHLC	0.032	MTARLPRTLLSLSDDLLLIILDCLPHDSDRRSWRLVCTLFLLLESRHRRSLAVRCRELLLPLVCLRYPLLHRLDLSRCPGVDDRALVLAFSQPGSLPLRALNLSSAFSVTFRGLAAAVRACPLLQEIDVSNCWRLGDREVAAISGAAAGLTSLNMARCLAVTDVGLAKVAVGCPSLQRLNLSCCLGISDTGIDLLAKKCMDLKFLDISYLRITVYSLRQISALRKLEALIVIGCMSIDDKGLEFFNTNHSSLLVISLHWRCLFIFSTRWLKDMVYLKSLKLDGIRVSSPTLSAISKNCRALTDVGLGKCIGVTDDGVAALVTEKLKTLDLTCCYLVTDNSIIAVANTCHKLTSLKLESCTKITEIGWHKIGTHCTALQELDLTDTFLNDTGLRSLSECS…	624	2649	https://www.nature.com/articles/s41467-019-12607-6	http://cotton.hzau.edu.cn/EN/Download.htm
PlantKGA_88	Piperales	Piperaceae	Piper	nigrum	Piper nigrum	black pepper	胡椒	chromosome	Yes	基因	evmmodelPn28271	evmmodelPn282711288xxPlantKGA_88	evm.model.Pn28.271	L	partial	Pn5	2466568	2469216	-	Pfam	PF13516	Leucine Rich repeat	Leucine-rich repeat	528	548	RNLRQINLMHCLISDVGIFVL	0.57	MTARLPRTLLSLSDDLLLIILDCLPHDSDRRSWRLVCTLFLLLESRHRRSLAVRCRELLLPLVCLRYPLLHRLDLSRCPGVDDRALVLAFSQPGSLPLRALNLSSAFSVTFRGLAAAVRACPLLQEIDVSNCWRLGDREVAAISGAAAGLTSLNMARCLAVTDVGLAKVAVGCPSLQRLNLSCCLGISDTGIDLLAKKCMDLKFLDISYLRITVYSLRQISALRKLEALIVIGCMSIDDKGLEFFNTNHSSLLVISLHWRCLFIFSTRWLKDMVYLKSLKLDGIRVSSPTLSAISKNCRALTDVGLGKCIGVTDDGVAALVTEKLKTLDLTCCYLVTDNSIIAVANTCHKLTSLKLESCTKITEIGWHKIGTHCTALQELDLTDTFLNDTGLRSLSECS…	624	2649	https://www.nature.com/articles/s41467-019-12607-6	http://cotton.hzau.edu.cn/EN/Download.htm
PlantKGA_88	Piperales	Piperaceae	Piper	nigrum	Piper nigrum	black pepper	胡椒	chromosome	Yes	基因	evmmodelPn28271	evmmodelPn282711288xxPlantKGA_88	evm.model.Pn28.271	L	partial	Pn5	2466568	2469216	-	Pfam	PF13516	Leucine Rich repeat	Leucine-rich repeat	423	447	NCHKLKELDLYRCTGIGDEGIISIA	0.0022	MTARLPRTLLSLSDDLLLIILDCLPHDSDRRSWRLVCTLFLLLESRHRRSLAVRCRELLLPLVCLRYPLLHRLDLSRCPGVDDRALVLAFSQPGSLPLRALNLSSAFSVTFRGLAAAVRACPLLQEIDVSNCWRLGDREVAAISGAAAGLTSLNMARCLAVTDVGLAKVAVGCPSLQRLNLSCCLGISDTGIDLLAKKCMDLKFLDISYLRITVYSLRQISALRKLEALIVIGCMSIDDKGLEFFNTNHSSLLVISLHWRCLFIFSTRWLKDMVYLKSLKLDGIRVSSPTLSAISKNCRALTDVGLGKCIGVTDDGVAALVTEKLKTLDLTCCYLVTDNSIIAVANTCHKLTSLKLESCTKITEIGWHKIGTHCTALQELDLTDTFLNDTGLRSLSECS…	624	2649	https://www.nature.com/articles/s41467-019-12607-6	http://cotton.hzau.edu.cn/EN/Download.htm
PlantKGA_88	Piperales	Piperaceae	Piper	nigrum	Piper nigrum	black pepper	胡椒	chromosome	Yes	基因	evmmodelPn30320	evmmodelPn303201288xxPlantKGA_88	evm.model.Pn30.320	L	partial	Pn26	11088252	11090972	-	Pfam	PF13516	Leucine Rich repeat	Leucine-rich repeat	391	413	RTLEHLNVDGCRKITDQSLVDIA	1.6	MHPVLGVEVVLIVLVVGIGFWALGSQFSVGSCSFSRLLPPCRRLSTMEVKYARSSWILASSCLLVLMLTCITLRGRKLALLHLLHWEGRLNSEKQTSINILPDECLYEIFRRLSSGKERSACASVSKQWLWLLSSISMSEIQMDKNGLNSAHARNEKDGLECDGFLTRCLEGKKATDVRLAAIAVGVTDAGLAAIAHGCPSLKILSLWNTPDVGDEGLAAIVIGFYGRSLTDLSLTSLHSVTKRGFWVLGTAEWYAVSLESLHLEECNGITQVGIISSLNSCGTKFKSLALGKCKGISENLTDLSEIHPCTSLRSLIIKYCPGFGSAGLAMVGKLCPNIRNLDLEGTYGATDAGLLTVFESCQLGLVKVNLKDCINLSDSVVSALCRLHGRTLEHLNVD…	501	2721	https://www.nature.com/articles/s41467-019-12607-6	http://cotton.hzau.edu.cn/EN/Download.htm
PlantKGA_88	Piperales	Piperaceae	Piper	nigrum	Piper nigrum	black pepper	胡椒	chromosome	Yes	基因	evmmodelPn30320	evmmodelPn303201288xxPlantKGA_88	evm.model.Pn30.320	L	partial	Pn26	11088252	11090972	-	Pfam	PF13516	Leucine Rich repeat	Leucine-rich repeat	416	438	CTLLTELDLSKSGVTDIGLAALA	0.017	MHPVLGVEVVLIVLVVGIGFWALGSQFSVGSCSFSRLLPPCRRLSTMEVKYARSSWILASSCLLVLMLTCITLRGRKLALLHLLHWEGRLNSEKQTSINILPDECLYEIFRRLSSGKERSACASVSKQWLWLLSSISMSEIQMDKNGLNSAHARNEKDGLECDGFLTRCLEGKKATDVRLAAIAVGVTDAGLAAIAHGCPSLKILSLWNTPDVGDEGLAAIVIGFYGRSLTDLSLTSLHSVTKRGFWVLGTAEWYAVSLESLHLEECNGITQVGIISSLNSCGTKFKSLALGKCKGISENLTDLSEIHPCTSLRSLIIKYCPGFGSAGLAMVGKLCPNIRNLDLEGTYGATDAGLLTVFESCQLGLVKVNLKDCINLSDSVVSALCRLHGRTLEHLNVD…	501	2721	https://www.nature.com/articles/s41467-019-12607-6	http://cotton.hzau.edu.cn/EN/Download.htm
PlantKGA_88	Piperales	Piperaceae	Piper	nigrum	Piper nigrum	black pepper	胡椒	chromosome	Yes	基因	evmmodelPn3040	evmmodelPn30401288xxPlantKGA_88	evm.model.Pn30.40	L	partial	Pn26	13220000	13221472	+	Pfam	PF13855	Leucine rich repeat	Leucine-rich repeat	166	226	PTLHSLVLRDNGHVGAIPAELSNLTHLRVLDLHSNQLSSSIPAGLSKLDRLRLLDLSSNRL	1.5e-09	MDKLLQLSLLLYLLMLLILLLYQPTSCRGFTVIMSDSAPPAAELLDTPQTGIIMRNGGGRTDPEEQRAVYEVMAATGNAWAADIPDVCKGRWHGIECMPDADEVYHVVSLSFGALSDDTAFPTCDPAASFLSPSLTRLPHLRSLFFYRCLASNPQPIPPFLGRLAPTLHSLVLRDNGHVGAIPAELSNLTHLRVLDLHSNQLSSSIPAGLSKLDRLRLLDLSSNRLFGAVPDLPVASLNVLDLSSNLLAGPFPASLGDARKLIKVDISRNRLVGPIPDTIAGLESLMLLDLSYNLLSGPLPASISELRSVRSIVLKGNCMSSTTIPSNVFSRLEELDVLVLSDMCLAGPVPSDLAGLPALRVLHLDGNRLNGGIPPAFSRIGLSELWLDGNQLAGVVPF…	490	1473	https://www.nature.com/articles/s41467-019-12607-6	http://cotton.hzau.edu.cn/EN/Download.htm
PlantKGA_88	Piperales	Piperaceae	Piper	nigrum	Piper nigrum	black pepper	胡椒	chromosome	Yes	基因	evmmodelPn3040	evmmodelPn30401288xxPlantKGA_88	evm.model.Pn30.40	L	partial	Pn26	13220000	13221472	+	Pfam	PF13855	Leucine rich repeat	Leucine-rich repeat	261	318	KLIKVDISRNRLVGPIPDTIAGLESLMLLDLSYNLLSGPLPASISELRSVRSIVLKGN	5.4e-09	MDKLLQLSLLLYLLMLLILLLYQPTSCRGFTVIMSDSAPPAAELLDTPQTGIIMRNGGGRTDPEEQRAVYEVMAATGNAWAADIPDVCKGRWHGIECMPDADEVYHVVSLSFGALSDDTAFPTCDPAASFLSPSLTRLPHLRSLFFYRCLASNPQPIPPFLGRLAPTLHSLVLRDNGHVGAIPAELSNLTHLRVLDLHSNQLSSSIPAGLSKLDRLRLLDLSSNRLFGAVPDLPVASLNVLDLSSNLLAGPFPASLGDARKLIKVDISRNRLVGPIPDTIAGLESLMLLDLSYNLLSGPLPASISELRSVRSIVLKGNCMSSTTIPSNVFSRLEELDVLVLSDMCLAGPVPSDLAGLPALRVLHLDGNRLNGGIPPAFSRIGLSELWLDGNQLAGVVPF…	490	1473	https://www.nature.com/articles/s41467-019-12607-6	http://cotton.hzau.edu.cn/EN/Download.htm
PlantKGA_88	Piperales	Piperaceae	Piper	nigrum	Piper nigrum	black pepper	胡椒	chromosome	Yes	基因	evmmodelPn3040	evmmodelPn30401288xxPlantKGA_88	evm.model.Pn30.40	L	partial	Pn26	13220000	13221472	+	Pfam	PF00560	Leucine Rich Repeat	Leucine-rich repeat	360	379	LRVLHLDGNRLNGGIPPAFS	1.7	MDKLLQLSLLLYLLMLLILLLYQPTSCRGFTVIMSDSAPPAAELLDTPQTGIIMRNGGGRTDPEEQRAVYEVMAATGNAWAADIPDVCKGRWHGIECMPDADEVYHVVSLSFGALSDDTAFPTCDPAASFLSPSLTRLPHLRSLFFYRCLASNPQPIPPFLGRLAPTLHSLVLRDNGHVGAIPAELSNLTHLRVLDLHSNQLSSSIPAGLSKLDRLRLLDLSSNRLFGAVPDLPVASLNVLDLSSNLLAGPFPASLGDARKLIKVDISRNRLVGPIPDTIAGLESLMLLDLSYNLLSGPLPASISELRSVRSIVLKGNCMSSTTIPSNVFSRLEELDVLVLSDMCLAGPVPSDLAGLPALRVLHLDGNRLNGGIPPAFSRIGLSELWLDGNQLAGVVPF…	490	1473	https://www.nature.com/articles/s41467-019-12607-6	http://cotton.hzau.edu.cn/EN/Download.htm
PlantKGA_88	Piperales	Piperaceae	Piper	nigrum	Piper nigrum	black pepper	胡椒	chromosome	Yes	基因	evmmodelPn3054	evmmodelPn30541288xxPlantKGA_88	evm.model.Pn30.54	L	partial	Pn26	13103972	13115021	+	Pfam	PF13855	Leucine rich repeat	Leucine-rich repeat	472	530	NLQSLELCGGAITDAGVENIKDLKAMTHLNISQNSALTDKTLELVSGLTALVSLNVSNS	1.6e-07	MGGACSRKGNQQANEDGLCRGLYSKYSKSGSSKWLGVSSPRSNTALHNDRNKCPSLMEICVSKICEGIYRYSTLSMLPRDISQQIFNELVSSQSLTDTTLKVFRDCAIQDIHLGYYPGVDDSWMDIISSQGSSLLSVDISGSNVSNSGLLFLKDCLNIQNLTLDYCGRITDDGLLYISDLSRLTSLSFKKSTTITADGMSTLEYFVNLVNLDLERCPQIHGGVVHLKGLKKLEYLNIRYCNSVTDDDIESISVLMNMKELQISCNKVTDLGVTHLKGLCKLVLLNLEGCPVTAACLESISGLNALAYLNLNRCAISDEGSEKFAELKNLKVLNLGFTNITDACLLHLKGLTLLESLNLDSCSIGDEGLASLSGLFHMKSLEVSDTDIGNAGLRHLSGLS…	578	11050	https://www.nature.com/articles/s41467-019-12607-6	http://cotton.hzau.edu.cn/EN/Download.htm
PlantKGA_88	Piperales	Piperaceae	Piper	nigrum	Piper nigrum	black pepper	胡椒	chromosome	Yes	基因	evmmodelPn3054	evmmodelPn30541288xxPlantKGA_88	evm.model.Pn30.54	L	partial	Pn26	13103972	13115021	+	Pfam	PF13516	Leucine Rich repeat	Leucine-rich repeat	351	372	TLLESLNLDSCSIGDEGLASLS	0.0081	MGGACSRKGNQQANEDGLCRGLYSKYSKSGSSKWLGVSSPRSNTALHNDRNKCPSLMEICVSKICEGIYRYSTLSMLPRDISQQIFNELVSSQSLTDTTLKVFRDCAIQDIHLGYYPGVDDSWMDIISSQGSSLLSVDISGSNVSNSGLLFLKDCLNIQNLTLDYCGRITDDGLLYISDLSRLTSLSFKKSTTITADGMSTLEYFVNLVNLDLERCPQIHGGVVHLKGLKKLEYLNIRYCNSVTDDDIESISVLMNMKELQISCNKVTDLGVTHLKGLCKLVLLNLEGCPVTAACLESISGLNALAYLNLNRCAISDEGSEKFAELKNLKVLNLGFTNITDACLLHLKGLTLLESLNLDSCSIGDEGLASLSGLFHMKSLEVSDTDIGNAGLRHLSGLS…	578	11050	https://www.nature.com/articles/s41467-019-12607-6	http://cotton.hzau.edu.cn/EN/Download.htm
PlantKGA_88	Piperales	Piperaceae	Piper	nigrum	Piper nigrum	black pepper	胡椒	chromosome	Yes	基因	evmmodelPn3054	evmmodelPn30541288xxPlantKGA_88	evm.model.Pn30.54	L	partial	Pn26	13103972	13115021	+	Pfam	PF13516	Leucine Rich repeat	Leucine-rich repeat	230	252	KKLEYLNIRYCNSVTDDDIESIS	0.27	MGGACSRKGNQQANEDGLCRGLYSKYSKSGSSKWLGVSSPRSNTALHNDRNKCPSLMEICVSKICEGIYRYSTLSMLPRDISQQIFNELVSSQSLTDTTLKVFRDCAIQDIHLGYYPGVDDSWMDIISSQGSSLLSVDISGSNVSNSGLLFLKDCLNIQNLTLDYCGRITDDGLLYISDLSRLTSLSFKKSTTITADGMSTLEYFVNLVNLDLERCPQIHGGVVHLKGLKKLEYLNIRYCNSVTDDDIESISVLMNMKELQISCNKVTDLGVTHLKGLCKLVLLNLEGCPVTAACLESISGLNALAYLNLNRCAISDEGSEKFAELKNLKVLNLGFTNITDACLLHLKGLTLLESLNLDSCSIGDEGLASLSGLFHMKSLEVSDTDIGNAGLRHLSGLS…	578	11050	https://www.nature.com/articles/s41467-019-12607-6	http://cotton.hzau.edu.cn/EN/Download.htm
PlantKGA_88	Piperales	Piperaceae	Piper	nigrum	Piper nigrum	black pepper	胡椒	chromosome	Yes	基因	evmmodelPn3054	evmmodelPn30541288xxPlantKGA_88	evm.model.Pn30.54	L	partial	Pn26	13103972	13115021	+	Pfam	PF13516	Leucine Rich repeat	Leucine-rich repeat	255	275	MNMKELQISCNKVTDLGVTHL	0.025	MGGACSRKGNQQANEDGLCRGLYSKYSKSGSSKWLGVSSPRSNTALHNDRNKCPSLMEICVSKICEGIYRYSTLSMLPRDISQQIFNELVSSQSLTDTTLKVFRDCAIQDIHLGYYPGVDDSWMDIISSQGSSLLSVDISGSNVSNSGLLFLKDCLNIQNLTLDYCGRITDDGLLYISDLSRLTSLSFKKSTTITADGMSTLEYFVNLVNLDLERCPQIHGGVVHLKGLKKLEYLNIRYCNSVTDDDIESISVLMNMKELQISCNKVTDLGVTHLKGLCKLVLLNLEGCPVTAACLESISGLNALAYLNLNRCAISDEGSEKFAELKNLKVLNLGFTNITDACLLHLKGLTLLESLNLDSCSIGDEGLASLSGLFHMKSLEVSDTDIGNAGLRHLSGLS…	578	11050	https://www.nature.com/articles/s41467-019-12607-6	http://cotton.hzau.edu.cn/EN/Download.htm
PlantKGA_88	Piperales	Piperaceae	Piper	nigrum	Piper nigrum	black pepper	胡椒	chromosome	Yes	基因	evmmodelPn3054	evmmodelPn30541288xxPlantKGA_88	evm.model.Pn30.54	L	partial	Pn26	13103972	13115021	+	Pfam	PF13516	Leucine Rich repeat	Leucine-rich repeat	375	396	FHMKSLEVSDTDIGNAGLRHLS	0.034	MGGACSRKGNQQANEDGLCRGLYSKYSKSGSSKWLGVSSPRSNTALHNDRNKCPSLMEICVSKICEGIYRYSTLSMLPRDISQQIFNELVSSQSLTDTTLKVFRDCAIQDIHLGYYPGVDDSWMDIISSQGSSLLSVDISGSNVSNSGLLFLKDCLNIQNLTLDYCGRITDDGLLYISDLSRLTSLSFKKSTTITADGMSTLEYFVNLVNLDLERCPQIHGGVVHLKGLKKLEYLNIRYCNSVTDDDIESISVLMNMKELQISCNKVTDLGVTHLKGLCKLVLLNLEGCPVTAACLESISGLNALAYLNLNRCAISDEGSEKFAELKNLKVLNLGFTNITDACLLHLKGLTLLESLNLDSCSIGDEGLASLSGLFHMKSLEVSDTDIGNAGLRHLSGLS…	578	11050	https://www.nature.com/articles/s41467-019-12607-6	http://cotton.hzau.edu.cn/EN/Download.htm
PlantKGA_88	Piperales	Piperaceae	Piper	nigrum	Piper nigrum	black pepper	胡椒	chromosome	Yes	基因	evmmodelPn3054	evmmodelPn30541288xxPlantKGA_88	evm.model.Pn30.54	L	partial	Pn26	13103972	13115021	+	Pfam	PF13516	Leucine Rich repeat	Leucine-rich repeat	305	324	LAYLNLNRCAISDEGSEKFA	0.83	MGGACSRKGNQQANEDGLCRGLYSKYSKSGSSKWLGVSSPRSNTALHNDRNKCPSLMEICVSKICEGIYRYSTLSMLPRDISQQIFNELVSSQSLTDTTLKVFRDCAIQDIHLGYYPGVDDSWMDIISSQGSSLLSVDISGSNVSNSGLLFLKDCLNIQNLTLDYCGRITDDGLLYISDLSRLTSLSFKKSTTITADGMSTLEYFVNLVNLDLERCPQIHGGVVHLKGLKKLEYLNIRYCNSVTDDDIESISVLMNMKELQISCNKVTDLGVTHLKGLCKLVLLNLEGCPVTAACLESISGLNALAYLNLNRCAISDEGSEKFAELKNLKVLNLGFTNITDACLLHLKGLTLLESLNLDSCSIGDEGLASLSGLFHMKSLEVSDTDIGNAGLRHLSGLS…	578	11050	https://www.nature.com/articles/s41467-019-12607-6	http://cotton.hzau.edu.cn/EN/Download.htm
PlantKGA_88	Piperales	Piperaceae	Piper	nigrum	Piper nigrum	black pepper	胡椒	chromosome	Yes	基因	evmmodelPn3054	evmmodelPn30541288xxPlantKGA_88	evm.model.Pn30.54	L	partial	Pn26	13103972	13115021	+	Pfam	PF13516	Leucine Rich repeat	Leucine-rich repeat	399	420	SNLETVNLSFTQISDGGLKKLS	0.0069	MGGACSRKGNQQANEDGLCRGLYSKYSKSGSSKWLGVSSPRSNTALHNDRNKCPSLMEICVSKICEGIYRYSTLSMLPRDISQQIFNELVSSQSLTDTTLKVFRDCAIQDIHLGYYPGVDDSWMDIISSQGSSLLSVDISGSNVSNSGLLFLKDCLNIQNLTLDYCGRITDDGLLYISDLSRLTSLSFKKSTTITADGMSTLEYFVNLVNLDLERCPQIHGGVVHLKGLKKLEYLNIRYCNSVTDDDIESISVLMNMKELQISCNKVTDLGVTHLKGLCKLVLLNLEGCPVTAACLESISGLNALAYLNLNRCAISDEGSEKFAELKNLKVLNLGFTNITDACLLHLKGLTLLESLNLDSCSIGDEGLASLSGLFHMKSLEVSDTDIGNAGLRHLSGLS…	578	11050	https://www.nature.com/articles/s41467-019-12607-6	http://cotton.hzau.edu.cn/EN/Download.htm
PlantKGA_88	Piperales	Piperaceae	Piper	nigrum	Piper nigrum	black pepper	胡椒	chromosome	Yes	基因	evmmodelPn3073	evmmodelPn30731288xxPlantKGA_88	evm.model.Pn30.73	L	partial	Pn26	12924820	12926158	-	Pfam	PF13855	Leucine rich repeat	Leucine-rich repeat	121	177	NLRNLDIDYCKRLTQLPEDIGNLVSLRGLRLQKTCISSLPDSICKLRNLRKLDIDRC	2.4e-06	ALQDLMELDLSYTLISHLPKSIGNLHNLRNLDIDYCKRLTQLPEDIGNLVSLRGLRLQKTCISSLPDSICKLEKLRVLKLVSCKSFSNLPDEIGALQDLMELDLSYTLISHLPKSIGNLHNLRNLDIDYCKRLTQLPEDIGNLVSLRGLRLQKTCISSLPDSICKLRNLRKLDIDRCDRLAQLPEDVCNLSRLERFSFDMNRVKRLPRGIGKLRNLEELGEFVVWKEEGWGIEELNGMNKLKGPLTISHLENVDGVEKAFSARLKSKMGIDSLCFKWSSLNDASDAGLATRDDGETVTKILDALEPCPNGLTTLSFVNYPGERVPTWMSKLRFPFLEDLTMDGLQCVERVMDVELPSLEFLTIQNCPKLRVVSMGLPKLKLAVVIDDQRLPGAGVLLRG…	408	1339	https://www.nature.com/articles/s41467-019-12607-6	http://cotton.hzau.edu.cn/EN/Download.htm
PlantKGA_88	Piperales	Piperaceae	Piper	nigrum	Piper nigrum	black pepper	胡椒	chromosome	Yes	基因	evmmodelPn3093	evmmodelPn30931288xxPlantKGA_88	evm.model.Pn30.93	L	partial	Pn26	12641182	12642170	-	Pfam	PF13855	Leucine rich repeat	Leucine-rich repeat	215	271	NLRNLDIGYCKRLTQLPEDIGNLVSLRKLRLQKTSISSLPDSICKLRNLRKLDIDGC	1.2e-06	ALQDLTELNLSSTLISHLPKSIGNLCNLRNLDIGYCERFTQLPEDIGNLVSLRKLRLKQTSISSLPDSICKLEKLRVLNLDICKSFSNLPDEIGALQDLMELNLSSTLISHLPKSIGNLCNLRNLDIRYCVRLTQLPEDIGNLVSLRELRLKQTSISSLPDSICKLEKLQVLNLYCCKSFSNLPDGIGALQDLMELNLCGTSISNLPKSIGNLCNLRNLDIGYCKRLTQLPEDIGNLVSLRKLRLQKTSISSLPDSICKLRNLRKLDIDGCERLAQLPEDVCNLSSLERFSSNMNRVKDCREAVENYTTWKSWVNLLFGKKKDGESKS	328	989	https://www.nature.com/articles/s41467-019-12607-6	http://cotton.hzau.edu.cn/EN/Download.htm
PlantKGA_88	Piperales	Piperaceae	Piper	nigrum	Piper nigrum	black pepper	胡椒	chromosome	Yes	基因	evmmodelPn32079	evmmodelPn320791288xxPlantKGA_88	evm.model.Pn3.2079	L	partial	Pn13	21736206	21738642	-	Pfam	PF13516	Leucine Rich repeat	Leucine-rich repeat	504	523	CPKLQKLEIRDCPFGDGGLL	0.17	MWAAEEEERVGAGSLKTSEDGSPSSSSGAEVLDIVLENVLCFLDYRRVRSAVSEVCKSWYRAEAFTRTHLFIGNCYAVSPTRAIGRFPRVRSIVLKGRPRFADFNLVPPDWGAHFGPWVEAMATAYPLLEKVCLKRMTVTDRDLAVLADSFPEFKELVLICCDGFGTKGLAELARKCRQLKVLDLFDDEVMEDGEDWISCFPETTNCLESFSFDCVESPINFDALEKLVGRSPLLKKLRLNRHVSVGQLQRLMLRAPQLTHLGTGSFSSADNGQGENRLADLYSAFSACKCLIRLSGFRDIVADLLPALSPVCTNLTSLNLSYANVTSEQLKPVIVHCHKLQRFWALDSIRDEGLVAVASTCKDLLELRVFPMDAREDSDAQVSDTGLTAISVGCRKLK…	599	2437	https://www.nature.com/articles/s41467-019-12607-6	http://cotton.hzau.edu.cn/EN/Download.htm
PlantKGA_88	Piperales	Piperaceae	Piper	nigrum	Piper nigrum	black pepper	胡椒	chromosome	Yes	基因	evmmodelPn32079	evmmodelPn320791288xxPlantKGA_88	evm.model.Pn3.2079	L	partial	Pn13	21736206	21738642	-	Pfam	PF13516	Leucine Rich repeat	Leucine-rich repeat	313	329	CTNLTSLNLSYANVTSE	0.95	MWAAEEEERVGAGSLKTSEDGSPSSSSGAEVLDIVLENVLCFLDYRRVRSAVSEVCKSWYRAEAFTRTHLFIGNCYAVSPTRAIGRFPRVRSIVLKGRPRFADFNLVPPDWGAHFGPWVEAMATAYPLLEKVCLKRMTVTDRDLAVLADSFPEFKELVLICCDGFGTKGLAELARKCRQLKVLDLFDDEVMEDGEDWISCFPETTNCLESFSFDCVESPINFDALEKLVGRSPLLKKLRLNRHVSVGQLQRLMLRAPQLTHLGTGSFSSADNGQGENRLADLYSAFSACKCLIRLSGFRDIVADLLPALSPVCTNLTSLNLSYANVTSEQLKPVIVHCHKLQRFWALDSIRDEGLVAVASTCKDLLELRVFPMDAREDSDAQVSDTGLTAISVGCRKLK…	599	2437	https://www.nature.com/articles/s41467-019-12607-6	http://cotton.hzau.edu.cn/EN/Download.htm
PlantKGA_88	Piperales	Piperaceae	Piper	nigrum	Piper nigrum	black pepper	胡椒	chromosome	Yes	基因	evmmodelPn32521	evmmodelPn325211288xxPlantKGA_88	evm.model.Pn3.2521	L	partial	Pn13	25155910	25158895	+	Pfam	PF13516	Leucine Rich repeat	Leucine-rich repeat	379	401	TSLTTISLRGCDRLTDECVSAIS	0.63	EISPTVDLLYPLLPPNPHLRSLKVDCSRLNDSSISLLVNPFLHEIRLQNCENFSGKLLSELGMQCGDLRFLSVGSEHGIHEIDIQDLSGLLCGCSKLESLGLFFDVSMFNRHSFAHVWVHASVNLQALEIGFIPSVMMAEVIRSKAVIRPAYQSQLLLFPNLQKLCLSVDYISDALVTTISNGLVSLTHLDLQDAPIMEPGIAIDLTNSGLEQINPEGRLKHLSLVRSQEFLMTYFKRINDLGVFLMTDKCANLESICLAGFCRVTDAGIRAILHSCCNLHKLRVCHGTQLTNLVFHDISATSLSLTHVGLGWCHLLTNQAILGLVSNRDLIVLDLRNCRNLGDGAMRVIAELLRLQVLLLDGTDISDMSFSFFKQGLTSLTTISLRGCDRLTDECVSA…	570	2986	https://www.nature.com/articles/s41467-019-12607-6	http://cotton.hzau.edu.cn/EN/Download.htm
PlantKGA_88	Piperales	Piperaceae	Piper	nigrum	Piper nigrum	black pepper	胡椒	chromosome	Yes	基因	evmmodelPn32554	evmmodelPn325541288xxPlantKGA_88	evm.model.Pn3.2554	L	partial	Pn13	25366486	25367508	-	Pfam	PF00560	Leucine Rich Repeat	Leucine-rich repeat	75	94	LRALNLSRNYLFGKIPPEIG	0.36	LVASSGGDQDRMALLDVKAHITGDPLGALSSWNSTAHICHWYGVTCGDERVTELTLINQKLRGSLSPSIGNLTFLRALNLSRNYLFGKIPPEIGRLQNLLYLNLSRNSFLGEIPSNISQCQILVALSLGHNKLEGNIPPTLSSMEALVILSLIGNQLTGKIPDPFCNFSSNLNFFSIASNNLHGSVPGCLSRIPMLQYLLLSSNYLSGEIFSAFFNLSTLAALQVANNNLHGNLPSDLFLTLPNLQSLIVGKNQLMGTIPSSLANASQLLALEVGRNSFTGHVPRNLGRLKSLLVLGLAQNQLGSYGEDDDLGFLQSLVNCTRLTYLAVTDNHLGGDLPK	340	1023	https://www.nature.com/articles/s41467-019-12607-6	http://cotton.hzau.edu.cn/EN/Download.htm
PlantKGA_88	Piperales	Piperaceae	Piper	nigrum	Piper nigrum	black pepper	胡椒	chromosome	Yes	基因	evmmodelPn32554	evmmodelPn325541288xxPlantKGA_88	evm.model.Pn3.2554	L	partial	Pn13	25366486	25367508	-	Pfam	PF08263	Leucine rich repeat N-terminal domain	Leucine-rich repeat-containing N-terminal, plant-type	8	46	DQDRMALLDVKAHITGDPLGALSSWNSTAHICHWYGVTC	9.7e-13	LVASSGGDQDRMALLDVKAHITGDPLGALSSWNSTAHICHWYGVTCGDERVTELTLINQKLRGSLSPSIGNLTFLRALNLSRNYLFGKIPPEIGRLQNLLYLNLSRNSFLGEIPSNISQCQILVALSLGHNKLEGNIPPTLSSMEALVILSLIGNQLTGKIPDPFCNFSSNLNFFSIASNNLHGSVPGCLSRIPMLQYLLLSSNYLSGEIFSAFFNLSTLAALQVANNNLHGNLPSDLFLTLPNLQSLIVGKNQLMGTIPSSLANASQLLALEVGRNSFTGHVPRNLGRLKSLLVLGLAQNQLGSYGEDDDLGFLQSLVNCTRLTYLAVTDNHLGGDLPK	340	1023	https://www.nature.com/articles/s41467-019-12607-6	http://cotton.hzau.edu.cn/EN/Download.htm
PlantKGA_88	Piperales	Piperaceae	Piper	nigrum	Piper nigrum	black pepper	胡椒	chromosome	Yes	基因	evmmodelPn32607	evmmodelPn326071288xxPlantKGA_88	evm.model.Pn3.2607	L	partial	Pn13	25894268	25895368	-	Pfam	PF13855	Leucine rich repeat	Leucine-rich repeat	204	262	LSRVLLARNQLSGPIPSSISSMSRLADLDLSDNHISGSIPSSLGGMPVLATLYLSRNKI	1.2e-08	MGPAITAAAAAVVALLAAVTAFGCSTDDRATLLEFQSTLSESNHGIFKTWTAGRDCSAWYGVSCDPATGRVAGIDLRGESEDPIFAGGPGHMTGTISPAVCRLRGLTSLVLADWKGISGPIPSCIPTSLPDLRILDLVGNSLTGEIPADVGKLSLLRVLNLADNQIAGEIPASVTGMRDLKHLDLSDNRLAGEIPEDIGSMQMLSRVLLARNQLSGPIPSSISSMSRLADLDLSDNHISGSIPSSLGGMPVLATLYLSRNKISGRIPAGLLANQDLSSLNLSRNAIEGTIPNAFGGRSYFTMLDLSYNKLSGAVPKSITGAAYVGHLDLSHNHLCGPIPSGKPIEHLEAPSFAGNDCLCGMPLQAC	366	1101	https://www.nature.com/articles/s41467-019-12607-6	http://cotton.hzau.edu.cn/EN/Download.htm
PlantKGA_88	Piperales	Piperaceae	Piper	nigrum	Piper nigrum	black pepper	胡椒	chromosome	Yes	基因	evmmodelPn32607	evmmodelPn326071288xxPlantKGA_88	evm.model.Pn3.2607	L	partial	Pn13	25894268	25895368	-	Pfam	PF13855	Leucine rich repeat	Leucine-rich repeat	131	190	DLRILDLVGNSLTGEIPADVGKLSLLRVLNLADNQIAGEIPASVTGMRDLKHLDLSDNRL	2.6e-08	MGPAITAAAAAVVALLAAVTAFGCSTDDRATLLEFQSTLSESNHGIFKTWTAGRDCSAWYGVSCDPATGRVAGIDLRGESEDPIFAGGPGHMTGTISPAVCRLRGLTSLVLADWKGISGPIPSCIPTSLPDLRILDLVGNSLTGEIPADVGKLSLLRVLNLADNQIAGEIPASVTGMRDLKHLDLSDNRLAGEIPEDIGSMQMLSRVLLARNQLSGPIPSSISSMSRLADLDLSDNHISGSIPSSLGGMPVLATLYLSRNKISGRIPAGLLANQDLSSLNLSRNAIEGTIPNAFGGRSYFTMLDLSYNKLSGAVPKSITGAAYVGHLDLSHNHLCGPIPSGKPIEHLEAPSFAGNDCLCGMPLQAC	366	1101	https://www.nature.com/articles/s41467-019-12607-6	http://cotton.hzau.edu.cn/EN/Download.htm
PlantKGA_88	Piperales	Piperaceae	Piper	nigrum	Piper nigrum	black pepper	胡椒	chromosome	Yes	基因	evmmodelPn32607	evmmodelPn326071288xxPlantKGA_88	evm.model.Pn3.2607	L	partial	Pn13	25894268	25895368	-	Pfam	PF13855	Leucine rich repeat	Leucine-rich repeat	276	334	LSSLNLSRNAIEGTIPNAFGGRSYFTMLDLSYNKLSGAVPKSITGAAYVGHLDLSHNHL	7.3e-10	MGPAITAAAAAVVALLAAVTAFGCSTDDRATLLEFQSTLSESNHGIFKTWTAGRDCSAWYGVSCDPATGRVAGIDLRGESEDPIFAGGPGHMTGTISPAVCRLRGLTSLVLADWKGISGPIPSCIPTSLPDLRILDLVGNSLTGEIPADVGKLSLLRVLNLADNQIAGEIPASVTGMRDLKHLDLSDNRLAGEIPEDIGSMQMLSRVLLARNQLSGPIPSSISSMSRLADLDLSDNHISGSIPSSLGGMPVLATLYLSRNKISGRIPAGLLANQDLSSLNLSRNAIEGTIPNAFGGRSYFTMLDLSYNKLSGAVPKSITGAAYVGHLDLSHNHLCGPIPSGKPIEHLEAPSFAGNDCLCGMPLQAC	366	1101	https://www.nature.com/articles/s41467-019-12607-6	http://cotton.hzau.edu.cn/EN/Download.htm
PlantKGA_88	Piperales	Piperaceae	Piper	nigrum	Piper nigrum	black pepper	胡椒	chromosome	Yes	基因	evmmodelPn32607	evmmodelPn326071288xxPlantKGA_88	evm.model.Pn3.2607	L	partial	Pn13	25894268	25895368	-	Pfam	PF08263	Leucine rich repeat N-terminal domain	Leucine-rich repeat-containing N-terminal, plant-type	27	65	DDRATLLEFQSTLSESNHGIFKTWTAGRDCSAWYGVSCD	1.1e-05	MGPAITAAAAAVVALLAAVTAFGCSTDDRATLLEFQSTLSESNHGIFKTWTAGRDCSAWYGVSCDPATGRVAGIDLRGESEDPIFAGGPGHMTGTISPAVCRLRGLTSLVLADWKGISGPIPSCIPTSLPDLRILDLVGNSLTGEIPADVGKLSLLRVLNLADNQIAGEIPASVTGMRDLKHLDLSDNRLAGEIPEDIGSMQMLSRVLLARNQLSGPIPSSISSMSRLADLDLSDNHISGSIPSSLGGMPVLATLYLSRNKISGRIPAGLLANQDLSSLNLSRNAIEGTIPNAFGGRSYFTMLDLSYNKLSGAVPKSITGAAYVGHLDLSHNHLCGPIPSGKPIEHLEAPSFAGNDCLCGMPLQAC	366	1101	https://www.nature.com/articles/s41467-019-12607-6	http://cotton.hzau.edu.cn/EN/Download.htm
PlantKGA_88	Piperales	Piperaceae	Piper	nigrum	Piper nigrum	black pepper	胡椒	chromosome	Yes	基因	evmmodelPn32708	evmmodelPn327081288xxPlantKGA_88	evm.model.Pn3.2708	L	partial	Pn13	26697562	26699268	+	Pfam	PF00560	Leucine Rich Repeat	Leucine-rich repeat	235	257	NITYLDLSNNLFSGGIPVSICSL	1.8	MLFFKLFKKMQNKTWVCHILLILSSHLVLAKDEDTPPVCSAPDRAALLDFKASIVEDTTGALSSWVRTDCCSWDGIQCDPNTGRVTSLQLQRVHDGQGRLYMKGTLSPSLGNLPFLEVIMLTGMKQIRGSIPGSYTRLPRLAVLVLEDMMLQGAIPPSLGQLRLLQVLSLSGNRFQGQLPPSLGQLTNLIEMNFGKNFLTGSIPESYTAFHKLQYLDLSYNLLSGGLNLVGQLQNITYLDLSNNLFSGGIPVSICSLKNAGRIDLSQNNFSGAIPTQVGNLVSLTILSLSHNQLTGSIPSSVAQLSKLSTFNLSSNRISGPLPATLASGVPNLLSIDLSYNNLNLGDVPEWLRTRALYDLHFAGCNIKGNLPNFTNPDNFNSLDLSDNQITGAVDDYFV…	568	1707	https://www.nature.com/articles/s41467-019-12607-6	http://cotton.hzau.edu.cn/EN/Download.htm
PlantKGA_88	Piperales	Piperaceae	Piper	nigrum	Piper nigrum	black pepper	胡椒	chromosome	Yes	基因	evmmodelPn32708	evmmodelPn327081288xxPlantKGA_88	evm.model.Pn3.2708	L	partial	Pn13	26697562	26699268	+	Pfam	PF08263	Leucine rich repeat N-terminal domain	Leucine-rich repeat-containing N-terminal, plant-type	41	79	APDRAALLDFKASIVEDTTGALSSWVRTDCCSWDGIQCD	8.7e-13	MLFFKLFKKMQNKTWVCHILLILSSHLVLAKDEDTPPVCSAPDRAALLDFKASIVEDTTGALSSWVRTDCCSWDGIQCDPNTGRVTSLQLQRVHDGQGRLYMKGTLSPSLGNLPFLEVIMLTGMKQIRGSIPGSYTRLPRLAVLVLEDMMLQGAIPPSLGQLRLLQVLSLSGNRFQGQLPPSLGQLTNLIEMNFGKNFLTGSIPESYTAFHKLQYLDLSYNLLSGGLNLVGQLQNITYLDLSNNLFSGGIPVSICSLKNAGRIDLSQNNFSGAIPTQVGNLVSLTILSLSHNQLTGSIPSSVAQLSKLSTFNLSSNRISGPLPATLASGVPNLLSIDLSYNNLNLGDVPEWLRTRALYDLHFAGCNIKGNLPNFTNPDNFNSLDLSDNQITGAVDDYFV…	568	1707	https://www.nature.com/articles/s41467-019-12607-6	http://cotton.hzau.edu.cn/EN/Download.htm
PlantKGA_88	Piperales	Piperaceae	Piper	nigrum	Piper nigrum	black pepper	胡椒	chromosome	Yes	基因	evmmodelPn32708	evmmodelPn327081288xxPlantKGA_88	evm.model.Pn3.2708	L	partial	Pn13	26697562	26699268	+	Pfam	PF13855	Leucine rich repeat	Leucine-rich repeat	164	223	LLQVLSLSGNRFQGQLPPSLGQLTNLIEMNFGKNFLTGSIPESYTAFHKLQYLDLSYNLL	1.5e-06	MLFFKLFKKMQNKTWVCHILLILSSHLVLAKDEDTPPVCSAPDRAALLDFKASIVEDTTGALSSWVRTDCCSWDGIQCDPNTGRVTSLQLQRVHDGQGRLYMKGTLSPSLGNLPFLEVIMLTGMKQIRGSIPGSYTRLPRLAVLVLEDMMLQGAIPPSLGQLRLLQVLSLSGNRFQGQLPPSLGQLTNLIEMNFGKNFLTGSIPESYTAFHKLQYLDLSYNLLSGGLNLVGQLQNITYLDLSNNLFSGGIPVSICSLKNAGRIDLSQNNFSGAIPTQVGNLVSLTILSLSHNQLTGSIPSSVAQLSKLSTFNLSSNRISGPLPATLASGVPNLLSIDLSYNNLNLGDVPEWLRTRALYDLHFAGCNIKGNLPNFTNPDNFNSLDLSDNQITGAVDDYFV…	568	1707	https://www.nature.com/articles/s41467-019-12607-6	http://cotton.hzau.edu.cn/EN/Download.htm
PlantKGA_88	Piperales	Piperaceae	Piper	nigrum	Piper nigrum	black pepper	胡椒	chromosome	Yes	基因	evmmodelPn32708	evmmodelPn327081288xxPlantKGA_88	evm.model.Pn3.2708	L	partial	Pn13	26697562	26699268	+	Pfam	PF13855	Leucine rich repeat	Leucine-rich repeat	262	318	RIDLSQNNFSGAIPTQVGNLVSLTILSLSHNQLTGSIPSSVAQLSKLSTFNLSSNRI	1.1e-07	MLFFKLFKKMQNKTWVCHILLILSSHLVLAKDEDTPPVCSAPDRAALLDFKASIVEDTTGALSSWVRTDCCSWDGIQCDPNTGRVTSLQLQRVHDGQGRLYMKGTLSPSLGNLPFLEVIMLTGMKQIRGSIPGSYTRLPRLAVLVLEDMMLQGAIPPSLGQLRLLQVLSLSGNRFQGQLPPSLGQLTNLIEMNFGKNFLTGSIPESYTAFHKLQYLDLSYNLLSGGLNLVGQLQNITYLDLSNNLFSGGIPVSICSLKNAGRIDLSQNNFSGAIPTQVGNLVSLTILSLSHNQLTGSIPSSVAQLSKLSTFNLSSNRISGPLPATLASGVPNLLSIDLSYNNLNLGDVPEWLRTRALYDLHFAGCNIKGNLPNFTNPDNFNSLDLSDNQITGAVDDYFV…	568	1707	https://www.nature.com/articles/s41467-019-12607-6	http://cotton.hzau.edu.cn/EN/Download.htm
PlantKGA_88	Piperales	Piperaceae	Piper	nigrum	Piper nigrum	black pepper	胡椒	chromosome	Yes	基因	evmmodelPn32708	evmmodelPn327081288xxPlantKGA_88	evm.model.Pn3.2708	L	partial	Pn13	26697562	26699268	+	Pfam	PF13855	Leucine rich repeat	Leucine-rich repeat	453	511	LKLLDMSSNQITGAIPSSIRNLTMLEMLNLSRNKIQGVIPASMGQMTELKWLDLSINGL	2.2e-10	MLFFKLFKKMQNKTWVCHILLILSSHLVLAKDEDTPPVCSAPDRAALLDFKASIVEDTTGALSSWVRTDCCSWDGIQCDPNTGRVTSLQLQRVHDGQGRLYMKGTLSPSLGNLPFLEVIMLTGMKQIRGSIPGSYTRLPRLAVLVLEDMMLQGAIPPSLGQLRLLQVLSLSGNRFQGQLPPSLGQLTNLIEMNFGKNFLTGSIPESYTAFHKLQYLDLSYNLLSGGLNLVGQLQNITYLDLSNNLFSGGIPVSICSLKNAGRIDLSQNNFSGAIPTQVGNLVSLTILSLSHNQLTGSIPSSVAQLSKLSTFNLSSNRISGPLPATLASGVPNLLSIDLSYNNLNLGDVPEWLRTRALYDLHFAGCNIKGNLPNFTNPDNFNSLDLSDNQITGAVDDYFV…	568	1707	https://www.nature.com/articles/s41467-019-12607-6	http://cotton.hzau.edu.cn/EN/Download.htm
PlantKGA_88	Piperales	Piperaceae	Piper	nigrum	Piper nigrum	black pepper	胡椒	chromosome	Yes	基因	evmmodelPn32737	evmmodelPn327371288xxPlantKGA_88	evm.model.Pn3.2737	L	partial	Pn13	26880214	26881563	+	Pfam	PF13855	Leucine rich repeat	Leucine-rich repeat	334	392	LKVLDMSSNQITGAIPSSIRNLTMLEMLNLSRNKIQGVIPASMGQMTELKWLDLSINGL	4.1e-11	MLTGMKQIRGSIPGSYTRLPRLAVLVLEDMMLQGAIPPSLGQLRLLQVLSLSGNRFQGQLPPSLGQLTNLIEMNFGKNFLTGSIPESYTAFHKLQYLDLSHNLLSGGLNLVGQLQNITYLDLSSNLFSGGIPVSICSLKNAGRIDLSQNNFSGAIPTQVGNLVSLTILSLSHNQLTGSIPSSVAQLSKLSTFNLSSNRISGPLPATLASGVPNLLSIDLSYNNLNLGDVPEWLRTRALYDLHFAGCNIKGNLPNFTNPDNINSLDLSDNQITGAVDDYFVRMGNVQNIKLSGNMLRSDVSKIELPYGVAVFDLHSNQLHGPFPLLLKKLPTNFLKVLDMSSNQITGAIPSSIRNLTMLEMLNLSRNKIQGVIPASMGQMTELKWLDLSINGLTGSIPSS…	449	1350	https://www.nature.com/articles/s41467-019-12607-6	http://cotton.hzau.edu.cn/EN/Download.htm
PlantKGA_88	Piperales	Piperaceae	Piper	nigrum	Piper nigrum	black pepper	胡椒	chromosome	Yes	基因	evmmodelPn32737	evmmodelPn327371288xxPlantKGA_88	evm.model.Pn3.2737	L	partial	Pn13	26880214	26881563	+	Pfam	PF13855	Leucine rich repeat	Leucine-rich repeat	143	199	RIDLSQNNFSGAIPTQVGNLVSLTILSLSHNQLTGSIPSSVAQLSKLSTFNLSSNRI	8.2e-08	MLTGMKQIRGSIPGSYTRLPRLAVLVLEDMMLQGAIPPSLGQLRLLQVLSLSGNRFQGQLPPSLGQLTNLIEMNFGKNFLTGSIPESYTAFHKLQYLDLSHNLLSGGLNLVGQLQNITYLDLSSNLFSGGIPVSICSLKNAGRIDLSQNNFSGAIPTQVGNLVSLTILSLSHNQLTGSIPSSVAQLSKLSTFNLSSNRISGPLPATLASGVPNLLSIDLSYNNLNLGDVPEWLRTRALYDLHFAGCNIKGNLPNFTNPDNINSLDLSDNQITGAVDDYFVRMGNVQNIKLSGNMLRSDVSKIELPYGVAVFDLHSNQLHGPFPLLLKKLPTNFLKVLDMSSNQITGAIPSSIRNLTMLEMLNLSRNKIQGVIPASMGQMTELKWLDLSINGLTGSIPSS…	449	1350	https://www.nature.com/articles/s41467-019-12607-6	http://cotton.hzau.edu.cn/EN/Download.htm
PlantKGA_88	Piperales	Piperaceae	Piper	nigrum	Piper nigrum	black pepper	胡椒	chromosome	Yes	基因	evmmodelPn32825	evmmodelPn328251288xxPlantKGA_88	evm.model.Pn3.2825	L	partial	Pn13	27611101	27611376	-	Pfam	PF08263	Leucine rich repeat N-terminal domain	Leucine-rich repeat-containing N-terminal, plant-type	48	89	ETDQASLLSFQAQLESGGSSSMVLSSWNQSSHFCQWQGITCD	1.2e-09	MWIPFNHFRSMGSYELCARAGSFFLKASPLICCHSVLFATNGLYVGDETDQASLLSFQAQLESGGSSSMVLSSWNQSSHFCQWQGITCDRH	91	276	https://www.nature.com/articles/s41467-019-12607-6	http://cotton.hzau.edu.cn/EN/Download.htm
PlantKGA_88	Piperales	Piperaceae	Piper	nigrum	Piper nigrum	black pepper	胡椒	chromosome	Yes	基因	evmmodelPn33587	evmmodelPn335871288xxPlantKGA_88	evm.model.Pn3.3587	L	partial	Pn9	4002187	4003184	+	Pfam	PF13516	Leucine Rich repeat	Leucine-rich repeat	30	52	CSLHHLNVSECVKIGDAGLIAIA	0.0015	MRCASNDTIVPSYRDKVDWSDALIAIGKGCSLHHLNVSECVKIGDAGLIAIARGCPQLAYLDVSVLQNLGDIAMAELGKGCVLLKDVILSHCRQISDAGLAHLVKRCTLLESCHMVYCPLVTAAGVATVVSCCSSIKRILVEKWKVSQKTRRRAASILYYRC	162	998	https://www.nature.com/articles/s41467-019-12607-6	http://cotton.hzau.edu.cn/EN/Download.htm
PlantKGA_88	Piperales	Piperaceae	Piper	nigrum	Piper nigrum	black pepper	胡椒	chromosome	Yes	基因	evmmodelPn33587	evmmodelPn335871288xxPlantKGA_88	evm.model.Pn3.3587	L	partial	Pn9	4002187	4003184	+	Pfam	PF13516	Leucine Rich repeat	Leucine-rich repeat	84	103	LKDVILSHCRQISDAGLAHL	0.77	MRCASNDTIVPSYRDKVDWSDALIAIGKGCSLHHLNVSECVKIGDAGLIAIARGCPQLAYLDVSVLQNLGDIAMAELGKGCVLLKDVILSHCRQISDAGLAHLVKRCTLLESCHMVYCPLVTAAGVATVVSCCSSIKRILVEKWKVSQKTRRRAASILYYRC	162	998	https://www.nature.com/articles/s41467-019-12607-6	http://cotton.hzau.edu.cn/EN/Download.htm
PlantKGA_88	Piperales	Piperaceae	Piper	nigrum	Piper nigrum	black pepper	胡椒	chromosome	Yes	基因	evmmodelPn33600	evmmodelPn336001288xxPlantKGA_88	evm.model.Pn3.3600	L	partial	Pn9	4070301	4070900	+	Pfam	PF13855	Leucine rich repeat	Leucine-rich repeat	7	64	RRLTNLILCHNRLSGAVPTFFSAKLVRFDLKHNDLSGGLPRYALPTSLQYLSLSYNHL	1.9e-06	GGGGQPRRLTNLILCHNRLSGAVPTFFSAKLVRFDLKHNDLSGGLPRYALPTSLQYLSLSYNHLSGPVDCLLHRLVRLNYLDLSMNKFTGPSPPADFSLPVSSLQLQRNAFEGAVEPAAQESTPTVDLSYNRLYGWVSPLLSTVQNLYLNNKFTGHVPSPFADQLLAAGIQTLYVQHNFSTGMEISQTGAIRGSSSLCL	199	600	https://www.nature.com/articles/s41467-019-12607-6	http://cotton.hzau.edu.cn/EN/Download.htm
PlantKGA_88	Piperales	Piperaceae	Piper	nigrum	Piper nigrum	black pepper	胡椒	chromosome	Yes	基因	evmmodelPn33663	evmmodelPn336631288xxPlantKGA_88	evm.model.Pn3.3663	L	partial	Pn9	4496100	4496859	+	Pfam	PF13855	Leucine rich repeat	Leucine-rich repeat	86	145	VERLSLPQKGLRGLISSSIGNLTNLLHLNLSHNVLHGEIYSELFLSLKNLEILDLSFNKL	4.7e-07	MLERLQSRSESCLLPKNHGFSILSFVLTNLALASCYHACTQADRDSLLSFWLGLSTPPTLNWTMTPDPNSNCCQWEGIACDATGRVERLSLPQKGLRGLISSSIGNLTNLLHLNLSHNVLHGEIYSELFLSLKNLEILDLSFNKLSGKFPLIYSALHILNISGNSFSSNFPTLLQTFRLTVVNVSNNSFSGAIPTNAICANSSLLRALDLSHNKFSGIFIPWVL	224	760	https://www.nature.com/articles/s41467-019-12607-6	http://cotton.hzau.edu.cn/EN/Download.htm
PlantKGA_88	Piperales	Piperaceae	Piper	nigrum	Piper nigrum	black pepper	胡椒	chromosome	Yes	基因	evmmodelPn33663	evmmodelPn336631288xxPlantKGA_88	evm.model.Pn3.3663	L	partial	Pn9	4496100	4496859	+	Pfam	PF13516	Leucine Rich repeat	Leucine-rich repeat	202	216	SSLLRALDLSHNKFS	1.3	MLERLQSRSESCLLPKNHGFSILSFVLTNLALASCYHACTQADRDSLLSFWLGLSTPPTLNWTMTPDPNSNCCQWEGIACDATGRVERLSLPQKGLRGLISSSIGNLTNLLHLNLSHNVLHGEIYSELFLSLKNLEILDLSFNKLSGKFPLIYSALHILNISGNSFSSNFPTLLQTFRLTVVNVSNNSFSGAIPTNAICANSSLLRALDLSHNKFSGIFIPWVL	224	760	https://www.nature.com/articles/s41467-019-12607-6	http://cotton.hzau.edu.cn/EN/Download.htm
PlantKGA_88	Piperales	Piperaceae	Piper	nigrum	Piper nigrum	black pepper	胡椒	chromosome	Yes	基因	evmmodelPn33663	evmmodelPn336631288xxPlantKGA_88	evm.model.Pn3.3663	L	partial	Pn9	4496100	4496859	+	Pfam	PF08263	Leucine rich repeat N-terminal domain	Leucine-rich repeat-containing N-terminal, plant-type	42	81	ADRDSLLSFWLGLSTPPTLNWTMTPDPNSNCCQWEGIACD	3e-07	MLERLQSRSESCLLPKNHGFSILSFVLTNLALASCYHACTQADRDSLLSFWLGLSTPPTLNWTMTPDPNSNCCQWEGIACDATGRVERLSLPQKGLRGLISSSIGNLTNLLHLNLSHNVLHGEIYSELFLSLKNLEILDLSFNKLSGKFPLIYSALHILNISGNSFSSNFPTLLQTFRLTVVNVSNNSFSGAIPTNAICANSSLLRALDLSHNKFSGIFIPWVL	224	760	https://www.nature.com/articles/s41467-019-12607-6	http://cotton.hzau.edu.cn/EN/Download.htm
PlantKGA_88	Piperales	Piperaceae	Piper	nigrum	Piper nigrum	black pepper	胡椒	chromosome	Yes	基因	evmmodelPn33863	evmmodelPn338631288xxPlantKGA_88	evm.model.Pn3.3863	L	partial	Pn9	5934542	5938118	+	Pfam	PF13516	Leucine Rich repeat	Leucine-rich repeat	157	177	CKKITQLNLSGCKGISDESLL	0.13	MADEEGRRWNTDVVPRVLQILLNFLPHRDLPKLLLLNPSCYRALASRPPFSEVIDLHEMTNAGERLSSCLVDCKYRQVKQINLEFAQDVEDQHLIFLKNQLMDSLQNLKSLNLNGCRKISDIGLEAISSACLGLETFSIYWNVRITDLGIKHLVTNCKKITQLNLSGCKGISDESLLLIGVNYKNLEALNLTRCVKLTDDGLQHILINCSHLQSLNLYALSSFTDASYKKLALLTWLNYLDLCGSQEFGVTNLTWCVHVTDMGVIALALGCTSLEFLSLFGIVGVTNKCLEALSVSCSRTLTTLDVNGCVGIKKRSREELLQLFPNLKCFKVHS	334	3577	https://www.nature.com/articles/s41467-019-12607-6	http://cotton.hzau.edu.cn/EN/Download.htm
PlantKGA_88	Piperales	Piperaceae	Piper	nigrum	Piper nigrum	black pepper	胡椒	chromosome	Yes	基因	evmmodelPn33863	evmmodelPn338631288xxPlantKGA_88	evm.model.Pn3.3863	L	partial	Pn9	5934542	5938118	+	Pfam	PF13516	Leucine Rich repeat	Leucine-rich repeat	105	128	LQNLKSLNLNGCRKISDIGLEAIS	0.001	MADEEGRRWNTDVVPRVLQILLNFLPHRDLPKLLLLNPSCYRALASRPPFSEVIDLHEMTNAGERLSSCLVDCKYRQVKQINLEFAQDVEDQHLIFLKNQLMDSLQNLKSLNLNGCRKISDIGLEAISSACLGLETFSIYWNVRITDLGIKHLVTNCKKITQLNLSGCKGISDESLLLIGVNYKNLEALNLTRCVKLTDDGLQHILINCSHLQSLNLYALSSFTDASYKKLALLTWLNYLDLCGSQEFGVTNLTWCVHVTDMGVIALALGCTSLEFLSLFGIVGVTNKCLEALSVSCSRTLTTLDVNGCVGIKKRSREELLQLFPNLKCFKVHS	334	3577	https://www.nature.com/articles/s41467-019-12607-6	http://cotton.hzau.edu.cn/EN/Download.htm
PlantKGA_88	Piperales	Piperaceae	Piper	nigrum	Piper nigrum	black pepper	胡椒	chromosome	Yes	基因	evmmodelPn33863	evmmodelPn338631288xxPlantKGA_88	evm.model.Pn3.3863	L	partial	Pn9	5934542	5938118	+	Pfam	PF13516	Leucine Rich repeat	Leucine-rich repeat	185	205	NLEALNLTRCVKLTDDGLQHI	0.13	MADEEGRRWNTDVVPRVLQILLNFLPHRDLPKLLLLNPSCYRALASRPPFSEVIDLHEMTNAGERLSSCLVDCKYRQVKQINLEFAQDVEDQHLIFLKNQLMDSLQNLKSLNLNGCRKISDIGLEAISSACLGLETFSIYWNVRITDLGIKHLVTNCKKITQLNLSGCKGISDESLLLIGVNYKNLEALNLTRCVKLTDDGLQHILINCSHLQSLNLYALSSFTDASYKKLALLTWLNYLDLCGSQEFGVTNLTWCVHVTDMGVIALALGCTSLEFLSLFGIVGVTNKCLEALSVSCSRTLTTLDVNGCVGIKKRSREELLQLFPNLKCFKVHS	334	3577	https://www.nature.com/articles/s41467-019-12607-6	http://cotton.hzau.edu.cn/EN/Download.htm
PlantKGA_88	Piperales	Piperaceae	Piper	nigrum	Piper nigrum	black pepper	胡椒	chromosome	Yes	基因	evmmodelPn34134	evmmodelPn341341288xxPlantKGA_88	evm.model.Pn3.4134	L	partial	Pn9	7938735	7941353	+	Pfam	PF13516	Leucine Rich repeat	Leucine-rich repeat	265	288	YCPNLKSVIIKDCPLVGDQGIASL	1.1	MPALVNYRGEEDFCPTGTMCSSPLMFSLGPLDVYCPPRKRARSTAPFVLRTEAVSKKQVSIDVLPDECLFEIFRRLPGAKERCTCACVSKRWLSLQSSIRRAELCCEKPAVKKLEVEETFESAGDGEESMGDGYLTRCLEGKKATDTRLAAIAVGASGRGGLGKLIIRGSNSVRRVTNVGLSAVGRSCPSLKALSLWNLSSVGDQGLFEIGSGCPLMEKLDLCQCPLITDKGIAAIAENCPGLTSLSLELCPRIGNDSLQAIARYCPNLKSVIIKDCPLVGDQGIASLVSSASMLTHIKLQGAVNISDLSLAVIGHYGKVVTDLTFVGLNNVSEKGFWVMGNGVGLQKLRSLVIACCHGVTDLGLEAVSKGCPNLKLFNLQKCLTLSDEGLKAFTRSTI…	643	2619	https://www.nature.com/articles/s41467-019-12607-6	http://cotton.hzau.edu.cn/EN/Download.htm
PlantKGA_88	Piperales	Piperaceae	Piper	nigrum	Piper nigrum	black pepper	胡椒	chromosome	Yes	基因	evmmodelPn34134	evmmodelPn341341288xxPlantKGA_88	evm.model.Pn3.4134	L	partial	Pn9	7938735	7941353	+	Pfam	PF13516	Leucine Rich repeat	Leucine-rich repeat	534	555	TLEVLNLSGCRKVSDKSLEAIA	0.18	MPALVNYRGEEDFCPTGTMCSSPLMFSLGPLDVYCPPRKRARSTAPFVLRTEAVSKKQVSIDVLPDECLFEIFRRLPGAKERCTCACVSKRWLSLQSSIRRAELCCEKPAVKKLEVEETFESAGDGEESMGDGYLTRCLEGKKATDTRLAAIAVGASGRGGLGKLIIRGSNSVRRVTNVGLSAVGRSCPSLKALSLWNLSSVGDQGLFEIGSGCPLMEKLDLCQCPLITDKGIAAIAENCPGLTSLSLELCPRIGNDSLQAIARYCPNLKSVIIKDCPLVGDQGIASLVSSASMLTHIKLQGAVNISDLSLAVIGHYGKVVTDLTFVGLNNVSEKGFWVMGNGVGLQKLRSLVIACCHGVTDLGLEAVSKGCPNLKLFNLQKCLTLSDEGLKAFTRSTI…	643	2619	https://www.nature.com/articles/s41467-019-12607-6	http://cotton.hzau.edu.cn/EN/Download.htm
PlantKGA_88	Piperales	Piperaceae	Piper	nigrum	Piper nigrum	black pepper	胡椒	chromosome	Yes	基因	evmmodelPn34134	evmmodelPn341341288xxPlantKGA_88	evm.model.Pn3.4134	L	partial	Pn9	7938735	7941353	+	Pfam	PF13516	Leucine Rich repeat	Leucine-rich repeat	347	368	QKLRSLVIACCHGVTDLGLEAV	0.37	MPALVNYRGEEDFCPTGTMCSSPLMFSLGPLDVYCPPRKRARSTAPFVLRTEAVSKKQVSIDVLPDECLFEIFRRLPGAKERCTCACVSKRWLSLQSSIRRAELCCEKPAVKKLEVEETFESAGDGEESMGDGYLTRCLEGKKATDTRLAAIAVGASGRGGLGKLIIRGSNSVRRVTNVGLSAVGRSCPSLKALSLWNLSSVGDQGLFEIGSGCPLMEKLDLCQCPLITDKGIAAIAENCPGLTSLSLELCPRIGNDSLQAIARYCPNLKSVIIKDCPLVGDQGIASLVSSASMLTHIKLQGAVNISDLSLAVIGHYGKVVTDLTFVGLNNVSEKGFWVMGNGVGLQKLRSLVIACCHGVTDLGLEAVSKGCPNLKLFNLQKCLTLSDEGLKAFTRSTI…	643	2619	https://www.nature.com/articles/s41467-019-12607-6	http://cotton.hzau.edu.cn/EN/Download.htm
PlantKGA_88	Piperales	Piperaceae	Piper	nigrum	Piper nigrum	black pepper	胡椒	chromosome	Yes	基因	evmmodelPn34222	evmmodelPn342221288xxPlantKGA_88	evm.model.Pn3.4222	L	partial	Pn9	8615266	8616598	+	Pfam	PF08263	Leucine rich repeat N-terminal domain	Leucine-rich repeat-containing N-terminal, plant-type	31	70	PAEVDALRAIRRNSVDSQNFRGNWGRGDPCMRNWTGVGCS	2.4e-06	MSGLRNFLLSMLLYGSLLCFTLVVGAQITDPAEVDALRAIRRNSVDSQNFRGNWGRGDPCMRNWTGVGCSDAHLVDGYLHIQELHLLNMTLPGTIAPEVGNLFRLKILLLNGRNLTGLLPEELGYLPNLDRLQIDRNHISGPMPNSFANLDKTRTRHF	158	1333	https://www.nature.com/articles/s41467-019-12607-6	http://cotton.hzau.edu.cn/EN/Download.htm
PlantKGA_88	Piperales	Piperaceae	Piper	nigrum	Piper nigrum	black pepper	胡椒	chromosome	Yes	基因	evmmodelPn34509	evmmodelPn345091288xxPlantKGA_88	evm.model.Pn3.4509	L	partial	Pn9	10909269	10913572	+	Pfam	PF13855	Leucine rich repeat	Leucine-rich repeat	86	138	IDYERLVSIPESLTARLLNVVYLDVHSNQIKSLPNSIGCLKNLKVLNVSGNLL	5e-07	MQPRRGSDWAVQGLGGDGAGCSVAVRRWGCRRRRLCAFGCVHRTPLSMAACSNKRSGYCGNMRMEMRMAGDRKKPKSEEDQKMEKIDYERLVSIPESLTARLLNVVYLDVHSNQIKSLPNSIGCLKNLKVLNVSGNLLESLPKTIEDCGALEELNANFNKLTKLPDTIGFELHNLRRLSVNSNKLIILPYSTSHLTNLRVLDARLNCLGALPEDIENLLNLEVLNVSQNFQYLTSLPDSIGLCFSLLELDLSYNKITILPTSIGCLQKLQKLHVEGNPLVSPPLEVAKNGVDIVKEYLCGVINGKHENNKKGSWLGKMVRHKTFNFNSPLLHWVREKDGILLSDFRRLDGLASPRQLSMFSPKRLFSPKSYFSR	374	4304	https://www.nature.com/articles/s41467-019-12607-6	http://cotton.hzau.edu.cn/EN/Download.htm
PlantKGA_88	Piperales	Piperaceae	Piper	nigrum	Piper nigrum	black pepper	胡椒	chromosome	Yes	基因	evmmodelPn34509	evmmodelPn345091288xxPlantKGA_88	evm.model.Pn3.4509	L	partial	Pn9	10909269	10913572	+	Pfam	PF13855	Leucine rich repeat	Leucine-rich repeat	220	279	NLEVLNVSQNFQYLTSLPDSIGLCFSLLELDLSYNKITILPTSIGCLQKLQKLHVEGNPL	7.9e-08	MQPRRGSDWAVQGLGGDGAGCSVAVRRWGCRRRRLCAFGCVHRTPLSMAACSNKRSGYCGNMRMEMRMAGDRKKPKSEEDQKMEKIDYERLVSIPESLTARLLNVVYLDVHSNQIKSLPNSIGCLKNLKVLNVSGNLLESLPKTIEDCGALEELNANFNKLTKLPDTIGFELHNLRRLSVNSNKLIILPYSTSHLTNLRVLDARLNCLGALPEDIENLLNLEVLNVSQNFQYLTSLPDSIGLCFSLLELDLSYNKITILPTSIGCLQKLQKLHVEGNPLVSPPLEVAKNGVDIVKEYLCGVINGKHENNKKGSWLGKMVRHKTFNFNSPLLHWVREKDGILLSDFRRLDGLASPRQLSMFSPKRLFSPKSYFSR	374	4304	https://www.nature.com/articles/s41467-019-12607-6	http://cotton.hzau.edu.cn/EN/Download.htm
PlantKGA_88	Piperales	Piperaceae	Piper	nigrum	Piper nigrum	black pepper	胡椒	chromosome	Yes	基因	evmmodelPn34683	evmmodelPn346831288xxPlantKGA_88	evm.model.Pn3.4683	L	partial	Pn9	12796415	12798484	+	Pfam	PF13516	Leucine Rich repeat	Leucine-rich repeat	303	319	LTHLTELELAGNGIGGE	0.014	MNCFGARVSSPLITETPPSLKIRNPQMVAISERILLVFPTFLLFLPIHGSDPYRQDQSTADQEALLAFRSGIADDPKNVFENWQRSIHVCDWKGVECMNSLRVTNLSLYGHDLGGIISPFLSNLSHLQYLDLSANSIHGSIPPELGSLTMLKDLTFSQNRLEGPVPNSFGLLSNLRYISLSKNQLRGRLPLPLLYNCTKLRYIDLSNNFFVGFIPSSIGNRLPSLEDLFMYDNQLTGSIPTSISNCTNLVDLDLEFNYLNGRLPYHVFKYVTTLQTLHLSYNGFTSDDGNTNLSPFFESLANLTHLTELELAGNGIGGEIPEVIGLLRINLSHLQLDDNLIHGAIPPNITGLSNLILLNLSSNLLNGTIPAELSLLPSLERLCLSNNSLHGVIPEALGS…	689	2070	https://www.nature.com/articles/s41467-019-12607-6	http://cotton.hzau.edu.cn/EN/Download.htm
PlantKGA_88	Piperales	Piperaceae	Piper	nigrum	Piper nigrum	black pepper	胡椒	chromosome	Yes	基因	evmmodelPn34683	evmmodelPn346831288xxPlantKGA_88	evm.model.Pn3.4683	L	partial	Pn9	12796415	12798484	+	Pfam	PF13516	Leucine Rich repeat	Leucine-rich repeat	272	287	TTLQTLHLSYNGFTSD	1.7	MNCFGARVSSPLITETPPSLKIRNPQMVAISERILLVFPTFLLFLPIHGSDPYRQDQSTADQEALLAFRSGIADDPKNVFENWQRSIHVCDWKGVECMNSLRVTNLSLYGHDLGGIISPFLSNLSHLQYLDLSANSIHGSIPPELGSLTMLKDLTFSQNRLEGPVPNSFGLLSNLRYISLSKNQLRGRLPLPLLYNCTKLRYIDLSNNFFVGFIPSSIGNRLPSLEDLFMYDNQLTGSIPTSISNCTNLVDLDLEFNYLNGRLPYHVFKYVTTLQTLHLSYNGFTSDDGNTNLSPFFESLANLTHLTELELAGNGIGGEIPEVIGLLRINLSHLQLDDNLIHGAIPPNITGLSNLILLNLSSNLLNGTIPAELSLLPSLERLCLSNNSLHGVIPEALGS…	689	2070	https://www.nature.com/articles/s41467-019-12607-6	http://cotton.hzau.edu.cn/EN/Download.htm
PlantKGA_88	Piperales	Piperaceae	Piper	nigrum	Piper nigrum	black pepper	胡椒	chromosome	Yes	基因	evmmodelPn34683	evmmodelPn346831288xxPlantKGA_88	evm.model.Pn3.4683	L	partial	Pn9	12796415	12798484	+	Pfam	PF13855	Leucine rich repeat	Leucine-rich repeat	377	437	PSLERLCLSNNSLHGVIPEALGSSPHLGLLDLSQNKLSGPIPSSLSNLTQLRELRLSNNQL	1.4e-10	MNCFGARVSSPLITETPPSLKIRNPQMVAISERILLVFPTFLLFLPIHGSDPYRQDQSTADQEALLAFRSGIADDPKNVFENWQRSIHVCDWKGVECMNSLRVTNLSLYGHDLGGIISPFLSNLSHLQYLDLSANSIHGSIPPELGSLTMLKDLTFSQNRLEGPVPNSFGLLSNLRYISLSKNQLRGRLPLPLLYNCTKLRYIDLSNNFFVGFIPSSIGNRLPSLEDLFMYDNQLTGSIPTSISNCTNLVDLDLEFNYLNGRLPYHVFKYVTTLQTLHLSYNGFTSDDGNTNLSPFFESLANLTHLTELELAGNGIGGEIPEVIGLLRINLSHLQLDDNLIHGAIPPNITGLSNLILLNLSSNLLNGTIPAELSLLPSLERLCLSNNSLHGVIPEALGS…	689	2070	https://www.nature.com/articles/s41467-019-12607-6	http://cotton.hzau.edu.cn/EN/Download.htm
PlantKGA_88	Piperales	Piperaceae	Piper	nigrum	Piper nigrum	black pepper	胡椒	chromosome	Yes	基因	evmmodelPn34683	evmmodelPn346831288xxPlantKGA_88	evm.model.Pn3.4683	L	partial	Pn9	12796415	12798484	+	Pfam	PF13855	Leucine rich repeat	Leucine-rich repeat	199	259	KLRYIDLSNNFFVGFIPSSIGNRLPSLEDLFMYDNQLTGSIPTSISNCTNLVDLDLEFNYL	6.8e-08	MNCFGARVSSPLITETPPSLKIRNPQMVAISERILLVFPTFLLFLPIHGSDPYRQDQSTADQEALLAFRSGIADDPKNVFENWQRSIHVCDWKGVECMNSLRVTNLSLYGHDLGGIISPFLSNLSHLQYLDLSANSIHGSIPPELGSLTMLKDLTFSQNRLEGPVPNSFGLLSNLRYISLSKNQLRGRLPLPLLYNCTKLRYIDLSNNFFVGFIPSSIGNRLPSLEDLFMYDNQLTGSIPTSISNCTNLVDLDLEFNYLNGRLPYHVFKYVTTLQTLHLSYNGFTSDDGNTNLSPFFESLANLTHLTELELAGNGIGGEIPEVIGLLRINLSHLQLDDNLIHGAIPPNITGLSNLILLNLSSNLLNGTIPAELSLLPSLERLCLSNNSLHGVIPEALGS…	689	2070	https://www.nature.com/articles/s41467-019-12607-6	http://cotton.hzau.edu.cn/EN/Download.htm
PlantKGA_88	Piperales	Piperaceae	Piper	nigrum	Piper nigrum	black pepper	胡椒	chromosome	Yes	基因	evmmodelPn34683	evmmodelPn346831288xxPlantKGA_88	evm.model.Pn3.4683	L	partial	Pn9	12796415	12798484	+	Pfam	PF13855	Leucine rich repeat	Leucine-rich repeat	125	185	SHLQYLDLSANSIHGSIPPELGSLTMLKDLTFSQNRLEGPVPNSFGLLSNLRYISLSKNQL	7.1e-07	MNCFGARVSSPLITETPPSLKIRNPQMVAISERILLVFPTFLLFLPIHGSDPYRQDQSTADQEALLAFRSGIADDPKNVFENWQRSIHVCDWKGVECMNSLRVTNLSLYGHDLGGIISPFLSNLSHLQYLDLSANSIHGSIPPELGSLTMLKDLTFSQNRLEGPVPNSFGLLSNLRYISLSKNQLRGRLPLPLLYNCTKLRYIDLSNNFFVGFIPSSIGNRLPSLEDLFMYDNQLTGSIPTSISNCTNLVDLDLEFNYLNGRLPYHVFKYVTTLQTLHLSYNGFTSDDGNTNLSPFFESLANLTHLTELELAGNGIGGEIPEVIGLLRINLSHLQLDDNLIHGAIPPNITGLSNLILLNLSSNLLNGTIPAELSLLPSLERLCLSNNSLHGVIPEALGS…	689	2070	https://www.nature.com/articles/s41467-019-12607-6	http://cotton.hzau.edu.cn/EN/Download.htm
PlantKGA_88	Piperales	Piperaceae	Piper	nigrum	Piper nigrum	black pepper	胡椒	chromosome	Yes	基因	evmmodelPn34683	evmmodelPn346831288xxPlantKGA_88	evm.model.Pn3.4683	L	partial	Pn9	12796415	12798484	+	Pfam	PF00560	Leucine Rich Repeat	Leucine-rich repeat	548	569	IQTLDLSQNKLTGGIPPSLQNC	0.032	MNCFGARVSSPLITETPPSLKIRNPQMVAISERILLVFPTFLLFLPIHGSDPYRQDQSTADQEALLAFRSGIADDPKNVFENWQRSIHVCDWKGVECMNSLRVTNLSLYGHDLGGIISPFLSNLSHLQYLDLSANSIHGSIPPELGSLTMLKDLTFSQNRLEGPVPNSFGLLSNLRYISLSKNQLRGRLPLPLLYNCTKLRYIDLSNNFFVGFIPSSIGNRLPSLEDLFMYDNQLTGSIPTSISNCTNLVDLDLEFNYLNGRLPYHVFKYVTTLQTLHLSYNGFTSDDGNTNLSPFFESLANLTHLTELELAGNGIGGEIPEVIGLLRINLSHLQLDDNLIHGAIPPNITGLSNLILLNLSSNLLNGTIPAELSLLPSLERLCLSNNSLHGVIPEALGS…	689	2070	https://www.nature.com/articles/s41467-019-12607-6	http://cotton.hzau.edu.cn/EN/Download.htm
PlantKGA_88	Piperales	Piperaceae	Piper	nigrum	Piper nigrum	black pepper	胡椒	chromosome	Yes	基因	evmmodelPn34683	evmmodelPn346831288xxPlantKGA_88	evm.model.Pn3.4683	L	partial	Pn9	12796415	12798484	+	Pfam	PF08263	Leucine rich repeat N-terminal domain	Leucine-rich repeat-containing N-terminal, plant-type	60	97	ADQEALLAFRSGIADDPKNVFENWQRSIHVCDWKGVEC	1.7e-09	MNCFGARVSSPLITETPPSLKIRNPQMVAISERILLVFPTFLLFLPIHGSDPYRQDQSTADQEALLAFRSGIADDPKNVFENWQRSIHVCDWKGVECMNSLRVTNLSLYGHDLGGIISPFLSNLSHLQYLDLSANSIHGSIPPELGSLTMLKDLTFSQNRLEGPVPNSFGLLSNLRYISLSKNQLRGRLPLPLLYNCTKLRYIDLSNNFFVGFIPSSIGNRLPSLEDLFMYDNQLTGSIPTSISNCTNLVDLDLEFNYLNGRLPYHVFKYVTTLQTLHLSYNGFTSDDGNTNLSPFFESLANLTHLTELELAGNGIGGEIPEVIGLLRINLSHLQLDDNLIHGAIPPNITGLSNLILLNLSSNLLNGTIPAELSLLPSLERLCLSNNSLHGVIPEALGS…	689	2070	https://www.nature.com/articles/s41467-019-12607-6	http://cotton.hzau.edu.cn/EN/Download.htm
PlantKGA_88	Piperales	Piperaceae	Piper	nigrum	Piper nigrum	black pepper	胡椒	chromosome	Yes	基因	evmmodelPn3572	evmmodelPn35721288xxPlantKGA_88	evm.model.Pn3.572	L	partial	Pn25	11637165	11642942	-	Pfam	PF13855	Leucine rich repeat	Leucine-rich repeat	613	674	PNLRVLNLAENYRMSGTIPSWLGKLRSMEELDLSYCNLSGPIPPNFCDLSSLRILYLHDNLL	3e-07	PVPHPTPPPIGSLRIPKPAIAPVLHTLPPPPPNKDCSSLTCSEPLTNTLPGSPCGCIWPMQVGLRLSVPLNNTFLPLVSELAQVIAAGVYMKQSQVRTMGANAAPEQSDWTIVVINLVPVGESFDGTTALLIYQKFWHKKVFLPHHMSPSNITIEDGPLMRGGHDRAIKPLGVDVRNQRKKKLSGNLIIFYSTCFMSWSNMVFVVKSSRHDMHRPLPTPNNSQPTGKSSVISIIDIGEKQLLPDGQLYLINSQSSRIVVLTERKVYEDQGPKGKYMKIKDPKGSIMTQRVSSHKSGQQYYCWYNFHHVNLPTGGDRAACHDHEREALIKFRSGLEYDSYHQVATWGQIATGDCCKWRGVECDTQTGYVHQLRLFPDLFLDIYYFIWDGINKTGRLSGHL…	1337	5778	https://www.nature.com/articles/s41467-019-12607-6	http://cotton.hzau.edu.cn/EN/Download.htm
PlantKGA_88	Piperales	Piperaceae	Piper	nigrum	Piper nigrum	black pepper	胡椒	chromosome	Yes	基因	evmmodelPn3572	evmmodelPn35721288xxPlantKGA_88	evm.model.Pn3.572	L	partial	Pn25	11637165	11642942	-	Pfam	PF13855	Leucine rich repeat	Leucine-rich repeat	687	746	SLHTLDLDNNRLSGPIPHTFGNLSSLRILYLQDNHLSGPIPPNFGNLSSLRILYLQDNHL	1.9e-10	PVPHPTPPPIGSLRIPKPAIAPVLHTLPPPPPNKDCSSLTCSEPLTNTLPGSPCGCIWPMQVGLRLSVPLNNTFLPLVSELAQVIAAGVYMKQSQVRTMGANAAPEQSDWTIVVINLVPVGESFDGTTALLIYQKFWHKKVFLPHHMSPSNITIEDGPLMRGGHDRAIKPLGVDVRNQRKKKLSGNLIIFYSTCFMSWSNMVFVVKSSRHDMHRPLPTPNNSQPTGKSSVISIIDIGEKQLLPDGQLYLINSQSSRIVVLTERKVYEDQGPKGKYMKIKDPKGSIMTQRVSSHKSGQQYYCWYNFHHVNLPTGGDRAACHDHEREALIKFRSGLEYDSYHQVATWGQIATGDCCKWRGVECDTQTGYVHQLRLFPDLFLDIYYFIWDGINKTGRLSGHL…	1337	5778	https://www.nature.com/articles/s41467-019-12607-6	http://cotton.hzau.edu.cn/EN/Download.htm
PlantKGA_88	Piperales	Piperaceae	Piper	nigrum	Piper nigrum	black pepper	胡椒	chromosome	Yes	基因	evmmodelPn3572	evmmodelPn35721288xxPlantKGA_88	evm.model.Pn3.572	L	partial	Pn25	11637165	11642942	-	Pfam	PF00560	Leucine Rich Repeat	Leucine-rich repeat	1071	1093	SLQILDLSDNMLSGLIPKSIGKF	0.42	PVPHPTPPPIGSLRIPKPAIAPVLHTLPPPPPNKDCSSLTCSEPLTNTLPGSPCGCIWPMQVGLRLSVPLNNTFLPLVSELAQVIAAGVYMKQSQVRTMGANAAPEQSDWTIVVINLVPVGESFDGTTALLIYQKFWHKKVFLPHHMSPSNITIEDGPLMRGGHDRAIKPLGVDVRNQRKKKLSGNLIIFYSTCFMSWSNMVFVVKSSRHDMHRPLPTPNNSQPTGKSSVISIIDIGEKQLLPDGQLYLINSQSSRIVVLTERKVYEDQGPKGKYMKIKDPKGSIMTQRVSSHKSGQQYYCWYNFHHVNLPTGGDRAACHDHEREALIKFRSGLEYDSYHQVATWGQIATGDCCKWRGVECDTQTGYVHQLRLFPDLFLDIYYFIWDGINKTGRLSGHL…	1337	5778	https://www.nature.com/articles/s41467-019-12607-6	http://cotton.hzau.edu.cn/EN/Download.htm
PlantKGA_88	Piperales	Piperaceae	Piper	nigrum	Piper nigrum	black pepper	胡椒	chromosome	Yes	基因	evmmodelPn3572	evmmodelPn35721288xxPlantKGA_88	evm.model.Pn3.572	L	partial	Pn25	11637165	11642942	-	Pfam	PF00560	Leucine Rich Repeat	Leucine-rich repeat	977	998	LEILDLSSNYLTGELPFSISKL	1.8	PVPHPTPPPIGSLRIPKPAIAPVLHTLPPPPPNKDCSSLTCSEPLTNTLPGSPCGCIWPMQVGLRLSVPLNNTFLPLVSELAQVIAAGVYMKQSQVRTMGANAAPEQSDWTIVVINLVPVGESFDGTTALLIYQKFWHKKVFLPHHMSPSNITIEDGPLMRGGHDRAIKPLGVDVRNQRKKKLSGNLIIFYSTCFMSWSNMVFVVKSSRHDMHRPLPTPNNSQPTGKSSVISIIDIGEKQLLPDGQLYLINSQSSRIVVLTERKVYEDQGPKGKYMKIKDPKGSIMTQRVSSHKSGQQYYCWYNFHHVNLPTGGDRAACHDHEREALIKFRSGLEYDSYHQVATWGQIATGDCCKWRGVECDTQTGYVHQLRLFPDLFLDIYYFIWDGINKTGRLSGHL…	1337	5778	https://www.nature.com/articles/s41467-019-12607-6	http://cotton.hzau.edu.cn/EN/Download.htm
PlantKGA_88	Piperales	Piperaceae	Piper	nigrum	Piper nigrum	black pepper	胡椒	chromosome	Yes	基因	evmmodelPn3572	evmmodelPn35721288xxPlantKGA_88	evm.model.Pn3.572	L	partial	Pn25	11637165	11642942	-	Pfam	PF08263	Leucine rich repeat N-terminal domain	Leucine-rich repeat-containing N-terminal, plant-type	321	362	DHEREALIKFRSGLEYDSYHQVATWGQIATGDCCKWRGVECD	1.9e-08	PVPHPTPPPIGSLRIPKPAIAPVLHTLPPPPPNKDCSSLTCSEPLTNTLPGSPCGCIWPMQVGLRLSVPLNNTFLPLVSELAQVIAAGVYMKQSQVRTMGANAAPEQSDWTIVVINLVPVGESFDGTTALLIYQKFWHKKVFLPHHMSPSNITIEDGPLMRGGHDRAIKPLGVDVRNQRKKKLSGNLIIFYSTCFMSWSNMVFVVKSSRHDMHRPLPTPNNSQPTGKSSVISIIDIGEKQLLPDGQLYLINSQSSRIVVLTERKVYEDQGPKGKYMKIKDPKGSIMTQRVSSHKSGQQYYCWYNFHHVNLPTGGDRAACHDHEREALIKFRSGLEYDSYHQVATWGQIATGDCCKWRGVECDTQTGYVHQLRLFPDLFLDIYYFIWDGINKTGRLSGHL…	1337	5778	https://www.nature.com/articles/s41467-019-12607-6	http://cotton.hzau.edu.cn/EN/Download.htm
PlantKGA_88	Piperales	Piperaceae	Piper	nigrum	Piper nigrum	black pepper	胡椒	chromosome	Yes	基因	evmmodelPn3575	evmmodelPn35751288xxPlantKGA_88	evm.model.Pn3.575	L	partial	Pn25	11703942	11706941	-	Pfam	PF13516	Leucine Rich repeat	Leucine-rich repeat	226	239	PSLHELDLSDCKIG	0.79	MRNCSIWKFTLFFLLGVILCINCDTQNYKGGDRAACHDHEREALINFRSGLDYDSYHQVATWDQITTGDCCEWRGVECDTQTGYVLQLHLFPDLFLDNHDFIWDSINKTGRLSGHLDPVLLELEHLRFLDLSGNAFTSMPIPEFLGSFKDLQCLNLSYSHFAGQIPHKLGNLSNLEQLDIGGSYNLRTNSFHWLKGVPMLKILRMNEVNLSEIGNDWIQELNDGLPSLHELDLSDCKIGKMATTITSINFNHLRKLHLPFNDFLSKFPSWIANISSLESVDLSFNGFHGSIPSSICSAIPDLSGSGIEGLSETCLHATAHPLPNLRMLSLGFNDKMSGAIPSWLGKLRSLEELDLSNCNLSGPISPNFGNLSSLRILQLHNNHLSGPIPPNSGHLSSLR…	999	3000	https://www.nature.com/articles/s41467-019-12607-6	http://cotton.hzau.edu.cn/EN/Download.htm
PlantKGA_88	Piperales	Piperaceae	Piper	nigrum	Piper nigrum	black pepper	胡椒	chromosome	Yes	基因	evmmodelPn3575	evmmodelPn35751288xxPlantKGA_88	evm.model.Pn3.575	L	partial	Pn25	11703942	11706941	-	Pfam	PF13855	Leucine rich repeat	Leucine-rich repeat	709	759	RLKIVRLRSNKFTGALPPNFSSMDSLQILDLSDNMLSGLIPKSIGEFASLT	1.6e-06	MRNCSIWKFTLFFLLGVILCINCDTQNYKGGDRAACHDHEREALINFRSGLDYDSYHQVATWDQITTGDCCEWRGVECDTQTGYVLQLHLFPDLFLDNHDFIWDSINKTGRLSGHLDPVLLELEHLRFLDLSGNAFTSMPIPEFLGSFKDLQCLNLSYSHFAGQIPHKLGNLSNLEQLDIGGSYNLRTNSFHWLKGVPMLKILRMNEVNLSEIGNDWIQELNDGLPSLHELDLSDCKIGKMATTITSINFNHLRKLHLPFNDFLSKFPSWIANISSLESVDLSFNGFHGSIPSSICSAIPDLSGSGIEGLSETCLHATAHPLPNLRMLSLGFNDKMSGAIPSWLGKLRSLEELDLSNCNLSGPISPNFGNLSSLRILQLHNNHLSGPIPPNSGHLSSLR…	999	3000	https://www.nature.com/articles/s41467-019-12607-6	http://cotton.hzau.edu.cn/EN/Download.htm
PlantKGA_88	Piperales	Piperaceae	Piper	nigrum	Piper nigrum	black pepper	胡椒	chromosome	Yes	基因	evmmodelPn3575	evmmodelPn35751288xxPlantKGA_88	evm.model.Pn3.575	L	partial	Pn25	11703942	11706941	-	Pfam	PF13855	Leucine rich repeat	Leucine-rich repeat	397	456	SLRILYLQDNRLSGPIPPNFGNLSSLRILDLHSNRLSGILPATTWNLSRLEVLRLGNNSL	4.8e-09	MRNCSIWKFTLFFLLGVILCINCDTQNYKGGDRAACHDHEREALINFRSGLDYDSYHQVATWDQITTGDCCEWRGVECDTQTGYVLQLHLFPDLFLDNHDFIWDSINKTGRLSGHLDPVLLELEHLRFLDLSGNAFTSMPIPEFLGSFKDLQCLNLSYSHFAGQIPHKLGNLSNLEQLDIGGSYNLRTNSFHWLKGVPMLKILRMNEVNLSEIGNDWIQELNDGLPSLHELDLSDCKIGKMATTITSINFNHLRKLHLPFNDFLSKFPSWIANISSLESVDLSFNGFHGSIPSSICSAIPDLSGSGIEGLSETCLHATAHPLPNLRMLSLGFNDKMSGAIPSWLGKLRSLEELDLSNCNLSGPISPNFGNLSSLRILQLHNNHLSGPIPPNSGHLSSLR…	999	3000	https://www.nature.com/articles/s41467-019-12607-6	http://cotton.hzau.edu.cn/EN/Download.htm
PlantKGA_88	Piperales	Piperaceae	Piper	nigrum	Piper nigrum	black pepper	胡椒	chromosome	Yes	基因	evmmodelPn3575	evmmodelPn35751288xxPlantKGA_88	evm.model.Pn3.575	L	partial	Pn25	11703942	11706941	-	Pfam	PF08263	Leucine rich repeat N-terminal domain	Leucine-rich repeat-containing N-terminal, plant-type	38	79	DHEREALINFRSGLDYDSYHQVATWDQITTGDCCEWRGVECD	6.8e-09	MRNCSIWKFTLFFLLGVILCINCDTQNYKGGDRAACHDHEREALINFRSGLDYDSYHQVATWDQITTGDCCEWRGVECDTQTGYVLQLHLFPDLFLDNHDFIWDSINKTGRLSGHLDPVLLELEHLRFLDLSGNAFTSMPIPEFLGSFKDLQCLNLSYSHFAGQIPHKLGNLSNLEQLDIGGSYNLRTNSFHWLKGVPMLKILRMNEVNLSEIGNDWIQELNDGLPSLHELDLSDCKIGKMATTITSINFNHLRKLHLPFNDFLSKFPSWIANISSLESVDLSFNGFHGSIPSSICSAIPDLSGSGIEGLSETCLHATAHPLPNLRMLSLGFNDKMSGAIPSWLGKLRSLEELDLSNCNLSGPISPNFGNLSSLRILQLHNNHLSGPIPPNSGHLSSLR…	999	3000	https://www.nature.com/articles/s41467-019-12607-6	http://cotton.hzau.edu.cn/EN/Download.htm
PlantKGA_88	Piperales	Piperaceae	Piper	nigrum	Piper nigrum	black pepper	胡椒	chromosome	Yes	基因	evmmodelPn3575	evmmodelPn35751288xxPlantKGA_88	evm.model.Pn3.575	L	partial	Pn25	11703942	11706941	-	Pfam	PF00560	Leucine Rich Repeat	Leucine-rich repeat	853	873	LESLDISHNQLEGKIPSSLLQ	0.14	MRNCSIWKFTLFFLLGVILCINCDTQNYKGGDRAACHDHEREALINFRSGLDYDSYHQVATWDQITTGDCCEWRGVECDTQTGYVLQLHLFPDLFLDNHDFIWDSINKTGRLSGHLDPVLLELEHLRFLDLSGNAFTSMPIPEFLGSFKDLQCLNLSYSHFAGQIPHKLGNLSNLEQLDIGGSYNLRTNSFHWLKGVPMLKILRMNEVNLSEIGNDWIQELNDGLPSLHELDLSDCKIGKMATTITSINFNHLRKLHLPFNDFLSKFPSWIANISSLESVDLSFNGFHGSIPSSICSAIPDLSGSGIEGLSETCLHATAHPLPNLRMLSLGFNDKMSGAIPSWLGKLRSLEELDLSNCNLSGPISPNFGNLSSLRILQLHNNHLSGPIPPNSGHLSSLR…	999	3000	https://www.nature.com/articles/s41467-019-12607-6	http://cotton.hzau.edu.cn/EN/Download.htm
PlantKGA_88	Piperales	Piperaceae	Piper	nigrum	Piper nigrum	black pepper	胡椒	chromosome	Yes	基因	evmmodelPn3575	evmmodelPn35751288xxPlantKGA_88	evm.model.Pn3.575	L	partial	Pn25	11703942	11706941	-	Pfam	PF00560	Leucine Rich Repeat	Leucine-rich repeat	349	371	SLEELDLSNCNLSGPISPNFGNL	0.053	MRNCSIWKFTLFFLLGVILCINCDTQNYKGGDRAACHDHEREALINFRSGLDYDSYHQVATWDQITTGDCCEWRGVECDTQTGYVLQLHLFPDLFLDNHDFIWDSINKTGRLSGHLDPVLLELEHLRFLDLSGNAFTSMPIPEFLGSFKDLQCLNLSYSHFAGQIPHKLGNLSNLEQLDIGGSYNLRTNSFHWLKGVPMLKILRMNEVNLSEIGNDWIQELNDGLPSLHELDLSDCKIGKMATTITSINFNHLRKLHLPFNDFLSKFPSWIANISSLESVDLSFNGFHGSIPSSICSAIPDLSGSGIEGLSETCLHATAHPLPNLRMLSLGFNDKMSGAIPSWLGKLRSLEELDLSNCNLSGPISPNFGNLSSLRILQLHNNHLSGPIPPNSGHLSSLR…	999	3000	https://www.nature.com/articles/s41467-019-12607-6	http://cotton.hzau.edu.cn/EN/Download.htm
PlantKGA_88	Piperales	Piperaceae	Piper	nigrum	Piper nigrum	black pepper	胡椒	chromosome	Yes	基因	evmmodelPn3604	evmmodelPn36041288xxPlantKGA_88	evm.model.Pn3.604	L	partial	Pn25	11921767	11923240	+	Pfam	PF08263	Leucine rich repeat N-terminal domain	Leucine-rich repeat-containing N-terminal, plant-type	40	81	DHEREALVKFRSGLEYDSYHQVATWDHIATEDCCEWRGVECD	1.4e-08	MKSYSIWKLSPTLFFLLGVILCIDCDAKNYKGGDRATCHDHEREALVKFRSGLEYDSYHQVATWDHIATEDCCEWRGVECDTQTGYVLQLHLFPYLFLDNHDFIWDSINKTGKLSGHLDPVLLELELLRFLDLSSNAFTGMPIPEFFGSFKDLQCLNLSYSYFAGQIPHQLGNLSNLEQLDINGNFDLSANSLHWVKGMPMLKILRMNLVNLSEIGNDWIQVLNDGLPFLYELDLSYCRIGKIATTITSINFNHLRKLHLQDNEFVSKFPSWIANISSLESVNLCFNGFHGPIPSSICSAIPDLSSSGIDGLPETCLHATTHPLPNLRVLNLGENDRMSGTIPSWLGMLKSLEELDMSNCNLRGPIPPNFGDLSSLSILYLDNNRLSGPVPSNFGDLSS…	452	1474	https://www.nature.com/articles/s41467-019-12607-6	http://cotton.hzau.edu.cn/EN/Download.htm
PlantKGA_88	Piperales	Piperaceae	Piper	nigrum	Piper nigrum	black pepper	胡椒	chromosome	Yes	基因	evmmodelPn3604	evmmodelPn36041288xxPlantKGA_88	evm.model.Pn3.604	L	partial	Pn25	11921767	11923240	+	Pfam	PF13855	Leucine rich repeat	Leucine-rich repeat	375	425	SLSILYLDNNRLSGPVPSNFGDLSSLRILYLHNNRLSGILPTTTWNLSRLE	1.4e-08	MKSYSIWKLSPTLFFLLGVILCIDCDAKNYKGGDRATCHDHEREALVKFRSGLEYDSYHQVATWDHIATEDCCEWRGVECDTQTGYVLQLHLFPYLFLDNHDFIWDSINKTGKLSGHLDPVLLELELLRFLDLSSNAFTGMPIPEFFGSFKDLQCLNLSYSYFAGQIPHQLGNLSNLEQLDINGNFDLSANSLHWVKGMPMLKILRMNLVNLSEIGNDWIQVLNDGLPFLYELDLSYCRIGKIATTITSINFNHLRKLHLQDNEFVSKFPSWIANISSLESVNLCFNGFHGPIPSSICSAIPDLSSSGIDGLPETCLHATTHPLPNLRVLNLGENDRMSGTIPSWLGMLKSLEELDMSNCNLRGPIPPNFGDLSSLSILYLDNNRLSGPVPSNFGDLSS…	452	1474	https://www.nature.com/articles/s41467-019-12607-6	http://cotton.hzau.edu.cn/EN/Download.htm
PlantKGA_88	Piperales	Piperaceae	Piper	nigrum	Piper nigrum	black pepper	胡椒	chromosome	Yes	基因	evmmodelPn3604	evmmodelPn36041288xxPlantKGA_88	evm.model.Pn3.604	L	partial	Pn25	11921767	11923240	+	Pfam	PF00560	Leucine Rich Repeat	Leucine-rich repeat	351	371	SLEELDMSNCNLRGPIPPNFG	0.14	MKSYSIWKLSPTLFFLLGVILCIDCDAKNYKGGDRATCHDHEREALVKFRSGLEYDSYHQVATWDHIATEDCCEWRGVECDTQTGYVLQLHLFPYLFLDNHDFIWDSINKTGKLSGHLDPVLLELELLRFLDLSSNAFTGMPIPEFFGSFKDLQCLNLSYSYFAGQIPHQLGNLSNLEQLDINGNFDLSANSLHWVKGMPMLKILRMNLVNLSEIGNDWIQVLNDGLPFLYELDLSYCRIGKIATTITSINFNHLRKLHLQDNEFVSKFPSWIANISSLESVNLCFNGFHGPIPSSICSAIPDLSSSGIDGLPETCLHATTHPLPNLRVLNLGENDRMSGTIPSWLGMLKSLEELDMSNCNLRGPIPPNFGDLSSLSILYLDNNRLSGPVPSNFGDLSS…	452	1474	https://www.nature.com/articles/s41467-019-12607-6	http://cotton.hzau.edu.cn/EN/Download.htm
PlantKGA_88	Piperales	Piperaceae	Piper	nigrum	Piper nigrum	black pepper	胡椒	chromosome	Yes	基因	evmmodelPn36137	evmmodelPn361371288xxPlantKGA_88	evm.model.Pn36.137	L	partial	Pn25	6908068	6910123	-	Pfam	PF13855	Leucine rich repeat	Leucine-rich repeat	191	250	NLEVLNVSQNFQYLTSLPESIGLCFSLLELDLSYNKITTLPTSIGCLQKLQKLHVEGNPL	6.8e-08	IRVNCGNMRMEVRMAGDRRKLKSEEDQKMEKIDMSGLSLNILPNPSVNVTLIGHLDLSNNNLESIPESLTARLLNLVYLDVHSNQIKSLPNSIGCLKKLKVLNVSGNLLESLPKTIEDCGVLEELNANFNKLTKLPDTMGFELHNLRKLSVNSNKLIILPYSTSHLTNLRVLDARLNCLRALPEDIENLLNLEVLNVSQNFQYLTSLPESIGLCFSLLELDLSYNKITTLPTSIGCLQKLQKLHVEGNPLVSPPLEVAEKGVDMVKEYLCWVIKGEHENKKKGSWLGKMVRHKTFNFNSPVFHGVREKDGVLHSHYRRLDGLASPRQLSMFSPKRLFSPKSYFSR	345	2056	https://www.nature.com/articles/s41467-019-12607-6	http://cotton.hzau.edu.cn/EN/Download.htm
PlantKGA_88	Piperales	Piperaceae	Piper	nigrum	Piper nigrum	black pepper	胡椒	chromosome	Yes	基因	evmmodelPn36137	evmmodelPn361371288xxPlantKGA_88	evm.model.Pn36.137	L	partial	Pn25	6908068	6910123	-	Pfam	PF13855	Leucine rich repeat	Leucine-rich repeat	54	109	HLDLSNNNLESIPESLTARLLNLVYLDVHSNQIKSLPNSIGCLKKLKVLNVSGNLL	7e-10	IRVNCGNMRMEVRMAGDRRKLKSEEDQKMEKIDMSGLSLNILPNPSVNVTLIGHLDLSNNNLESIPESLTARLLNLVYLDVHSNQIKSLPNSIGCLKKLKVLNVSGNLLESLPKTIEDCGVLEELNANFNKLTKLPDTMGFELHNLRKLSVNSNKLIILPYSTSHLTNLRVLDARLNCLRALPEDIENLLNLEVLNVSQNFQYLTSLPESIGLCFSLLELDLSYNKITTLPTSIGCLQKLQKLHVEGNPLVSPPLEVAEKGVDMVKEYLCWVIKGEHENKKKGSWLGKMVRHKTFNFNSPVFHGVREKDGVLHSHYRRLDGLASPRQLSMFSPKRLFSPKSYFSR	345	2056	https://www.nature.com/articles/s41467-019-12607-6	http://cotton.hzau.edu.cn/EN/Download.htm
PlantKGA_88	Piperales	Piperaceae	Piper	nigrum	Piper nigrum	black pepper	胡椒	chromosome	Yes	基因	evmmodelPn40147	evmmodelPn401471288xxPlantKGA_88	evm.model.Pn40.147	L	partial	Pn16	13386753	13388660	+	Pfam	PF00560	Leucine Rich Repeat	Leucine-rich repeat	229	251	NLTLLDLSFNFLDGPIPASIVNL	0.28	MAGAGQPPPEPRGRRKAPPAATFLLVLAIFPLCSSQLSPSESSAMAGLAELLQPIGTVRVMNSSDPCSWRPFVTCSGGASISGIFLSGVSVRENTGRLFSYLCRLTSLRSLSLSDMSISSLPDEFFTSCAGLSGLSSLDLSMNLLGGSLPDFSVFSGLVELDLSSNLFSGVIDSQFGGLDQLKSLNLSNNSLSGSVPTQLGKAMALQSFRISRNRFTGPIPSQLFVYGNLTLLDLSFNFLDGPIPASIVNLTKLETLLLSANHLSGMLPVGLLNIPTLSRFAANANSFIGLIPEGIFSASLKMLGLSYNRLSGSIPDGLLSLPNLESVDLSYNGLLGFIPDKLSGNLFRLSLSSNSLTGLIPIGIGNLSKLEYFEVSNNGLTGNIPLELSNCGLLQSLN…	635	1908	https://www.nature.com/articles/s41467-019-12607-6	http://cotton.hzau.edu.cn/EN/Download.htm
PlantKGA_88	Piperales	Piperaceae	Piper	nigrum	Piper nigrum	black pepper	胡椒	chromosome	Yes	基因	evmmodelPn40147	evmmodelPn401471288xxPlantKGA_88	evm.model.Pn40.147	L	partial	Pn16	13386753	13388660	+	Pfam	PF13855	Leucine rich repeat	Leucine-rich repeat	157	216	GLVELDLSSNLFSGVIDSQFGGLDQLKSLNLSNNSLSGSVPTQLGKAMALQSFRISRNRF	2.4e-09	MAGAGQPPPEPRGRRKAPPAATFLLVLAIFPLCSSQLSPSESSAMAGLAELLQPIGTVRVMNSSDPCSWRPFVTCSGGASISGIFLSGVSVRENTGRLFSYLCRLTSLRSLSLSDMSISSLPDEFFTSCAGLSGLSSLDLSMNLLGGSLPDFSVFSGLVELDLSSNLFSGVIDSQFGGLDQLKSLNLSNNSLSGSVPTQLGKAMALQSFRISRNRFTGPIPSQLFVYGNLTLLDLSFNFLDGPIPASIVNLTKLETLLLSANHLSGMLPVGLLNIPTLSRFAANANSFIGLIPEGIFSASLKMLGLSYNRLSGSIPDGLLSLPNLESVDLSYNGLLGFIPDKLSGNLFRLSLSSNSLTGLIPIGIGNLSKLEYFEVSNNGLTGNIPLELSNCGLLQSLN…	635	1908	https://www.nature.com/articles/s41467-019-12607-6	http://cotton.hzau.edu.cn/EN/Download.htm
PlantKGA_88	Piperales	Piperaceae	Piper	nigrum	Piper nigrum	black pepper	胡椒	chromosome	Yes	基因	evmmodelPn41002	evmmodelPn410021288xxPlantKGA_88	evm.model.Pn4.1002	L	partial	Pn19	13285187	13286305	-	Pfam	PF08263	Leucine rich repeat N-terminal domain	Leucine-rich repeat-containing N-terminal, plant-type	30	69	DDDRAALAEFRSALSERRIGLFKSWDAGGDCCSGWHGVSC	4.4e-08	MGPTTAAAAVVAVMVAVAVISSTAAMSCSDDDRAALAEFRSALSERRIGLFKSWDAGGDCCSGWHGVSCYPATGRVAGIDIRGECEDPILAGRSGHMTGAISPAVCLLAGLTSLVVADWKAIAGPIPACIPTSLPNLRILDLAGNRLAGAVPTDIGKLSRLRLLNLAHNQLSGDIPASVAGMADLMHLDISGNRLAGEIPEKLGNLQMLSRVLLSRNQITGRIPGSIAGMRRLTDLDLSANKISGEIPVAIGEMPVLTSLYLSGNRISGEIPAGLMGKQGLTAMNLSGNEMEGVIPDVFGGTSYFTILDLSHNRLTGRVPKSIAGAAYVGHLDVSHNHLCGRIPAGKAIEHLEASSFAGNDCLCGSPLRNNC	372	1119	https://www.nature.com/articles/s41467-019-12607-6	http://cotton.hzau.edu.cn/EN/Download.htm
PlantKGA_88	Piperales	Piperaceae	Piper	nigrum	Piper nigrum	black pepper	胡椒	chromosome	Yes	基因	evmmodelPn41002	evmmodelPn410021288xxPlantKGA_88	evm.model.Pn4.1002	L	partial	Pn19	13285187	13286305	-	Pfam	PF13855	Leucine rich repeat	Leucine-rich repeat	280	339	GLTAMNLSGNEMEGVIPDVFGGTSYFTILDLSHNRLTGRVPKSIAGAAYVGHLDVSHNHL	3.9e-08	MGPTTAAAAVVAVMVAVAVISSTAAMSCSDDDRAALAEFRSALSERRIGLFKSWDAGGDCCSGWHGVSCYPATGRVAGIDIRGECEDPILAGRSGHMTGAISPAVCLLAGLTSLVVADWKAIAGPIPACIPTSLPNLRILDLAGNRLAGAVPTDIGKLSRLRLLNLAHNQLSGDIPASVAGMADLMHLDISGNRLAGEIPEKLGNLQMLSRVLLSRNQITGRIPGSIAGMRRLTDLDLSANKISGEIPVAIGEMPVLTSLYLSGNRISGEIPAGLMGKQGLTAMNLSGNEMEGVIPDVFGGTSYFTILDLSHNRLTGRVPKSIAGAAYVGHLDVSHNHLCGRIPAGKAIEHLEASSFAGNDCLCGSPLRNNC	372	1119	https://www.nature.com/articles/s41467-019-12607-6	http://cotton.hzau.edu.cn/EN/Download.htm
PlantKGA_88	Piperales	Piperaceae	Piper	nigrum	Piper nigrum	black pepper	胡椒	chromosome	Yes	基因	evmmodelPn41002	evmmodelPn410021288xxPlantKGA_88	evm.model.Pn4.1002	L	partial	Pn19	13285187	13286305	-	Pfam	PF13855	Leucine rich repeat	Leucine-rich repeat	135	195	PNLRILDLAGNRLAGAVPTDIGKLSRLRLLNLAHNQLSGDIPASVAGMADLMHLDISGNRL	2.4e-10	MGPTTAAAAVVAVMVAVAVISSTAAMSCSDDDRAALAEFRSALSERRIGLFKSWDAGGDCCSGWHGVSCYPATGRVAGIDIRGECEDPILAGRSGHMTGAISPAVCLLAGLTSLVVADWKAIAGPIPACIPTSLPNLRILDLAGNRLAGAVPTDIGKLSRLRLLNLAHNQLSGDIPASVAGMADLMHLDISGNRLAGEIPEKLGNLQMLSRVLLSRNQITGRIPGSIAGMRRLTDLDLSANKISGEIPVAIGEMPVLTSLYLSGNRISGEIPAGLMGKQGLTAMNLSGNEMEGVIPDVFGGTSYFTILDLSHNRLTGRVPKSIAGAAYVGHLDVSHNHLCGRIPAGKAIEHLEASSFAGNDCLCGSPLRNNC	372	1119	https://www.nature.com/articles/s41467-019-12607-6	http://cotton.hzau.edu.cn/EN/Download.htm
PlantKGA_88	Piperales	Piperaceae	Piper	nigrum	Piper nigrum	black pepper	胡椒	chromosome	Yes	基因	evmmodelPn41002	evmmodelPn410021288xxPlantKGA_88	evm.model.Pn4.1002	L	partial	Pn19	13285187	13286305	-	Pfam	PF13855	Leucine rich repeat	Leucine-rich repeat	209	267	LSRVLLSRNQITGRIPGSIAGMRRLTDLDLSANKISGEIPVAIGEMPVLTSLYLSGNRI	9.8e-10	MGPTTAAAAVVAVMVAVAVISSTAAMSCSDDDRAALAEFRSALSERRIGLFKSWDAGGDCCSGWHGVSCYPATGRVAGIDIRGECEDPILAGRSGHMTGAISPAVCLLAGLTSLVVADWKAIAGPIPACIPTSLPNLRILDLAGNRLAGAVPTDIGKLSRLRLLNLAHNQLSGDIPASVAGMADLMHLDISGNRLAGEIPEKLGNLQMLSRVLLSRNQITGRIPGSIAGMRRLTDLDLSANKISGEIPVAIGEMPVLTSLYLSGNRISGEIPAGLMGKQGLTAMNLSGNEMEGVIPDVFGGTSYFTILDLSHNRLTGRVPKSIAGAAYVGHLDVSHNHLCGRIPAGKAIEHLEASSFAGNDCLCGSPLRNNC	372	1119	https://www.nature.com/articles/s41467-019-12607-6	http://cotton.hzau.edu.cn/EN/Download.htm
PlantKGA_88	Piperales	Piperaceae	Piper	nigrum	Piper nigrum	black pepper	胡椒	chromosome	Yes	基因	evmmodelPn41025	evmmodelPn410251288xxPlantKGA_88	evm.model.Pn4.1025	L	partial	Pn19	13448439	13457684	-	Pfam	PF13855	Leucine rich repeat	Leucine-rich repeat	692	752	HLNRLDLSSNSLEGVVYEDWFQKLQNLKYLDLSYNSLAFRPKDDWIPPSKLVFIYLAACQI	9.1e-09	NQISLTLVFLVKSPTDQDFKTSLLASDKQITGFKPSIIHQRKKAFVAFDLNSKRQLRGSSIPPTIARSKKLEVLDLSHNLLSGEIVVKLEEGNLLKSLHLGSNKLYGDFPSSLKNCTVLEILDLSHNGFVGEIPEWLGELPLSLANISSLTRLNLSYNNFHGQIPIGTQLQGFENSFYGSPELCGLPLPKKCPQQSTTNNFREQAEEDESDIDILSLSVTMGPGFVMGFWGVLSQEEALLKFKNGLIDPSNRLESWQHGTDCCKWEGIQCGEQNGYVTSIDLQNPSVHRNLPFDSYVEGSNSLDNSCLRGQLDPALADLERLQSLDLRFNAFNGTKIPEFLGSMKELLHLDLSYAGFQGYIPYQIGNLSKLEFLDVSSLVRENVHVQMVSIDFRSWNGV…	1274	9246	https://www.nature.com/articles/s41467-019-12607-6	http://cotton.hzau.edu.cn/EN/Download.htm
PlantKGA_88	Piperales	Piperaceae	Piper	nigrum	Piper nigrum	black pepper	胡椒	chromosome	Yes	基因	evmmodelPn41025	evmmodelPn410251288xxPlantKGA_88	evm.model.Pn4.1025	L	partial	Pn19	13448439	13457684	-	Pfam	PF13855	Leucine rich repeat	Leucine-rich repeat	468	526	SLQRLDLSKNYIFSKFPSWVTNITTLRYLDLSSNLLEGELSYDLSELPYLNEIDVRKNH	2e-06	NQISLTLVFLVKSPTDQDFKTSLLASDKQITGFKPSIIHQRKKAFVAFDLNSKRQLRGSSIPPTIARSKKLEVLDLSHNLLSGEIVVKLEEGNLLKSLHLGSNKLYGDFPSSLKNCTVLEILDLSHNGFVGEIPEWLGELPLSLANISSLTRLNLSYNNFHGQIPIGTQLQGFENSFYGSPELCGLPLPKKCPQQSTTNNFREQAEEDESDIDILSLSVTMGPGFVMGFWGVLSQEEALLKFKNGLIDPSNRLESWQHGTDCCKWEGIQCGEQNGYVTSIDLQNPSVHRNLPFDSYVEGSNSLDNSCLRGQLDPALADLERLQSLDLRFNAFNGTKIPEFLGSMKELLHLDLSYAGFQGYIPYQIGNLSKLEFLDVSSLVRENVHVQMVSIDFRSWNGV…	1274	9246	https://www.nature.com/articles/s41467-019-12607-6	http://cotton.hzau.edu.cn/EN/Download.htm
PlantKGA_88	Piperales	Piperaceae	Piper	nigrum	Piper nigrum	black pepper	胡椒	chromosome	Yes	基因	evmmodelPn41025	evmmodelPn410251288xxPlantKGA_88	evm.model.Pn4.1025	L	partial	Pn19	13448439	13457684	-	Pfam	PF08263	Leucine rich repeat N-terminal domain	Leucine-rich repeat-containing N-terminal, plant-type	234	270	SQEEALLKFKNGLIDPSNRLESWQHGTDCCKWEGIQC	6e-13	NQISLTLVFLVKSPTDQDFKTSLLASDKQITGFKPSIIHQRKKAFVAFDLNSKRQLRGSSIPPTIARSKKLEVLDLSHNLLSGEIVVKLEEGNLLKSLHLGSNKLYGDFPSSLKNCTVLEILDLSHNGFVGEIPEWLGELPLSLANISSLTRLNLSYNNFHGQIPIGTQLQGFENSFYGSPELCGLPLPKKCPQQSTTNNFREQAEEDESDIDILSLSVTMGPGFVMGFWGVLSQEEALLKFKNGLIDPSNRLESWQHGTDCCKWEGIQCGEQNGYVTSIDLQNPSVHRNLPFDSYVEGSNSLDNSCLRGQLDPALADLERLQSLDLRFNAFNGTKIPEFLGSMKELLHLDLSYAGFQGYIPYQIGNLSKLEFLDVSSLVRENVHVQMVSIDFRSWNGV…	1274	9246	https://www.nature.com/articles/s41467-019-12607-6	http://cotton.hzau.edu.cn/EN/Download.htm
PlantKGA_88	Piperales	Piperaceae	Piper	nigrum	Piper nigrum	black pepper	胡椒	chromosome	Yes	基因	evmmodelPn41025	evmmodelPn410251288xxPlantKGA_88	evm.model.Pn4.1025	L	partial	Pn19	13448439	13457684	-	Pfam	PF13516	Leucine Rich repeat	Leucine-rich repeat	955	972	NCTNLEVLDLSKNKFSDE	0.2	NQISLTLVFLVKSPTDQDFKTSLLASDKQITGFKPSIIHQRKKAFVAFDLNSKRQLRGSSIPPTIARSKKLEVLDLSHNLLSGEIVVKLEEGNLLKSLHLGSNKLYGDFPSSLKNCTVLEILDLSHNGFVGEIPEWLGELPLSLANISSLTRLNLSYNNFHGQIPIGTQLQGFENSFYGSPELCGLPLPKKCPQQSTTNNFREQAEEDESDIDILSLSVTMGPGFVMGFWGVLSQEEALLKFKNGLIDPSNRLESWQHGTDCCKWEGIQCGEQNGYVTSIDLQNPSVHRNLPFDSYVEGSNSLDNSCLRGQLDPALADLERLQSLDLRFNAFNGTKIPEFLGSMKELLHLDLSYAGFQGYIPYQIGNLSKLEFLDVSSLVRENVHVQMVSIDFRSWNGV…	1274	9246	https://www.nature.com/articles/s41467-019-12607-6	http://cotton.hzau.edu.cn/EN/Download.htm
PlantKGA_88	Piperales	Piperaceae	Piper	nigrum	Piper nigrum	black pepper	胡椒	chromosome	Yes	基因	evmmodelPn41025	evmmodelPn410251288xxPlantKGA_88	evm.model.Pn4.1025	L	partial	Pn19	13448439	13457684	-	Pfam	PF13516	Leucine Rich repeat	Leucine-rich repeat	68	89	SKKLEVLDLSHNLLSGEIVVKL	0.23	NQISLTLVFLVKSPTDQDFKTSLLASDKQITGFKPSIIHQRKKAFVAFDLNSKRQLRGSSIPPTIARSKKLEVLDLSHNLLSGEIVVKLEEGNLLKSLHLGSNKLYGDFPSSLKNCTVLEILDLSHNGFVGEIPEWLGELPLSLANISSLTRLNLSYNNFHGQIPIGTQLQGFENSFYGSPELCGLPLPKKCPQQSTTNNFREQAEEDESDIDILSLSVTMGPGFVMGFWGVLSQEEALLKFKNGLIDPSNRLESWQHGTDCCKWEGIQCGEQNGYVTSIDLQNPSVHRNLPFDSYVEGSNSLDNSCLRGQLDPALADLERLQSLDLRFNAFNGTKIPEFLGSMKELLHLDLSYAGFQGYIPYQIGNLSKLEFLDVSSLVRENVHVQMVSIDFRSWNGV…	1274	9246	https://www.nature.com/articles/s41467-019-12607-6	http://cotton.hzau.edu.cn/EN/Download.htm
PlantKGA_88	Piperales	Piperaceae	Piper	nigrum	Piper nigrum	black pepper	胡椒	chromosome	Yes	基因	evmmodelPn41026	evmmodelPn410261288xxPlantKGA_88	evm.model.Pn4.1026	L	partial	Pn19	13468235	13468867	-	Pfam	PF13855	Leucine rich repeat	Leucine-rich repeat	44	98	IDLSCNKITGEIPKDLTNLHGLKVLNLSYNQLVGQIPKNIGMMTELESLDVSSNS	6e-08	MSIKHDIHKYIDSGTGYYEEKVVISMKGRQDEYITTILTLFNAIDLSCNKITGEIPKDLTNLHGLKVLNLSYNQLVGQIPKNIGMMTELESLDVSSNSMSELCGLPLPKKCPPQSTTNNFREQAEEDESDIDISPLSVTMGPGFVMGSWGVFGILILKRSWRAMFF	166	633	https://www.nature.com/articles/s41467-019-12607-6	http://cotton.hzau.edu.cn/EN/Download.htm
PlantKGA_88	Piperales	Piperaceae	Piper	nigrum	Piper nigrum	black pepper	胡椒	chromosome	Yes	基因	evmmodelPn41027	evmmodelPn410271288xxPlantKGA_88	evm.model.Pn4.1027	L	partial	Pn19	13468926	13469684	-	Pfam	PF13516	Leucine Rich repeat	Leucine-rich repeat	77	95	SKKLEVLDLSHNLLSGEIV	0.1	MLSRDGAHVQSKSEGPAELTDITIDQDFKRSLLASDKQITGSKPSITHQRKKAFIAFDLYSKRQPSGSSIPPTIARSKKLEVLDLSHNLLSGEIVVNREEGNRLKFLHLGSNKLYGDFPSWLKNCTVLEILDLSHNGFVGEIPEWLGKCSSLKILDLRSNTAIASFKLASS	171	759	https://www.nature.com/articles/s41467-019-12607-6	http://cotton.hzau.edu.cn/EN/Download.htm
PlantKGA_88	Piperales	Piperaceae	Piper	nigrum	Piper nigrum	black pepper	胡椒	chromosome	Yes	基因	evmmodelPn41027	evmmodelPn410271288xxPlantKGA_88	evm.model.Pn4.1027	L	partial	Pn19	13468926	13469684	-	Pfam	PF13855	Leucine rich repeat	Leucine-rich repeat	103	160	RLKFLHLGSNKLYGDFPSWLKNCTVLEILDLSHNGFVGEIPEWLGKCSSLKILDLRSN	1.7e-08	MLSRDGAHVQSKSEGPAELTDITIDQDFKRSLLASDKQITGSKPSITHQRKKAFIAFDLYSKRQPSGSSIPPTIARSKKLEVLDLSHNLLSGEIVVNREEGNRLKFLHLGSNKLYGDFPSWLKNCTVLEILDLSHNGFVGEIPEWLGKCSSLKILDLRSNTAIASFKLASS	171	759	https://www.nature.com/articles/s41467-019-12607-6	http://cotton.hzau.edu.cn/EN/Download.htm
PlantKGA_88	Piperales	Piperaceae	Piper	nigrum	Piper nigrum	black pepper	胡椒	chromosome	Yes	基因	evmmodelPn41029	evmmodelPn410291288xxPlantKGA_88	evm.model.Pn4.1029	L	partial	Pn19	13481606	13482142	-	Pfam	PF08263	Leucine rich repeat N-terminal domain	Leucine-rich repeat-containing N-terminal, plant-type	40	77	QSQEESLLKFKNGLIDPSNRLESWQNGTDCCKWEGIQC	3.8e-14	MDGSYSKLHHFPFYVCVLIPVCLCSLCDPCNGLSNVSCIQSQEESLLKFKNGLIDPSNRLESWQNGTDCCKWEGIQCGEQNGYVTSIDLQNPSVHRNLPFDSYVEGSNSLDNSCLGGQLDPALADLERLQSLNLRFNAFDGTKIPEFLGSMKELLHLDLSYAGFQGYIPYNSSTKETR	178	537	https://www.nature.com/articles/s41467-019-12607-6	http://cotton.hzau.edu.cn/EN/Download.htm
PlantKGA_88	Piperales	Piperaceae	Piper	nigrum	Piper nigrum	black pepper	胡椒	chromosome	Yes	基因	evmmodelPn41031	evmmodelPn410311288xxPlantKGA_88	evm.model.Pn4.1031	L	partial	Pn19	13488804	13492049	-	Pfam	PF13855	Leucine rich repeat	Leucine-rich repeat	275	333	SLQRLDLSKNYIFSKFPSWVTNITTLRYLDLSSNLLEGELSYDLSELPYLNEIDVRKNH	1.6e-06	MDGSYSKLHHFHLYVCVLTLVCLCSLCDPCNGLSNASCIQSQEEALLKFKNGLIDPSNRLESWQHGTDCCKWEGIQCGEQNGYVTSIDLQNPSVHRNLPFDSYVEGSNSLDNSCLRGQLDPALADLERLQSLNLRFNAFDGTKIPEFLGSMKELLHLDLSYAGFQGYIPYQIGNLSKLEFLDVSSLVRENVHVQMVSIDFRSWNGVHSSYLSSDNLHWLAGLASLKYLTMNQVNLSAITHADLHVFSSLPSLEQLNLSSCSLSVRLIFPPANFSSLQRLDLSKNYIFSKFPSWVTNITTLRYLDLSSNLLEGELSYDLSELPYLNEIDVRKNHNLRVNVSRLFAGAWRNATKIYLGFTDLRGRLPSSIGNISSLQGLNLYCNPDLPCGLEGSIPKEIGK…	1081	3246	https://www.nature.com/articles/s41467-019-12607-6	http://cotton.hzau.edu.cn/EN/Download.htm
PlantKGA_88	Piperales	Piperaceae	Piper	nigrum	Piper nigrum	black pepper	胡椒	chromosome	Yes	基因	evmmodelPn41031	evmmodelPn410311288xxPlantKGA_88	evm.model.Pn4.1031	L	partial	Pn19	13488804	13492049	-	Pfam	PF13855	Leucine rich repeat	Leucine-rich repeat	499	559	HLNRLDLSSNSLEGVVYEDWFQKLQNLQYLDLSYNSLAFRPKHDWIPPSKLVFIYLAACQI	8.5e-09	MDGSYSKLHHFHLYVCVLTLVCLCSLCDPCNGLSNASCIQSQEEALLKFKNGLIDPSNRLESWQHGTDCCKWEGIQCGEQNGYVTSIDLQNPSVHRNLPFDSYVEGSNSLDNSCLRGQLDPALADLERLQSLNLRFNAFDGTKIPEFLGSMKELLHLDLSYAGFQGYIPYQIGNLSKLEFLDVSSLVRENVHVQMVSIDFRSWNGVHSSYLSSDNLHWLAGLASLKYLTMNQVNLSAITHADLHVFSSLPSLEQLNLSSCSLSVRLIFPPANFSSLQRLDLSKNYIFSKFPSWVTNITTLRYLDLSSNLLEGELSYDLSELPYLNEIDVRKNHNLRVNVSRLFAGAWRNATKIYLGFTDLRGRLPSSIGNISSLQGLNLYCNPDLPCGLEGSIPKEIGK…	1081	3246	https://www.nature.com/articles/s41467-019-12607-6	http://cotton.hzau.edu.cn/EN/Download.htm
PlantKGA_88	Piperales	Piperaceae	Piper	nigrum	Piper nigrum	black pepper	胡椒	chromosome	Yes	基因	evmmodelPn41031	evmmodelPn410311288xxPlantKGA_88	evm.model.Pn4.1031	L	partial	Pn19	13488804	13492049	-	Pfam	PF08263	Leucine rich repeat N-terminal domain	Leucine-rich repeat-containing N-terminal, plant-type	40	77	QSQEEALLKFKNGLIDPSNRLESWQHGTDCCKWEGIQC	3e-13	MDGSYSKLHHFHLYVCVLTLVCLCSLCDPCNGLSNASCIQSQEEALLKFKNGLIDPSNRLESWQHGTDCCKWEGIQCGEQNGYVTSIDLQNPSVHRNLPFDSYVEGSNSLDNSCLRGQLDPALADLERLQSLNLRFNAFDGTKIPEFLGSMKELLHLDLSYAGFQGYIPYQIGNLSKLEFLDVSSLVRENVHVQMVSIDFRSWNGVHSSYLSSDNLHWLAGLASLKYLTMNQVNLSAITHADLHVFSSLPSLEQLNLSSCSLSVRLIFPPANFSSLQRLDLSKNYIFSKFPSWVTNITTLRYLDLSSNLLEGELSYDLSELPYLNEIDVRKNHNLRVNVSRLFAGAWRNATKIYLGFTDLRGRLPSSIGNISSLQGLNLYCNPDLPCGLEGSIPKEIGK…	1081	3246	https://www.nature.com/articles/s41467-019-12607-6	http://cotton.hzau.edu.cn/EN/Download.htm
PlantKGA_88	Piperales	Piperaceae	Piper	nigrum	Piper nigrum	black pepper	胡椒	chromosome	Yes	基因	evmmodelPn41033	evmmodelPn410331288xxPlantKGA_88	evm.model.Pn4.1033	L	partial	Pn19	13501935	13503976	-	Pfam	PF13516	Leucine Rich repeat	Leucine-rich repeat	147	166	SKKLEVLDLSHNLLSGEIVV	0.31	MRSIPSLTSPEIIMASKINGFGLYLDFAILFTLAFDLSPCAASAPLRSEDDSSSLLLLSCCEGREIKYRDHQNGGGAHVQTKSEGLAELSDITIDQDFKTSLLASDKQITGFKPSIIHQRKKAFVDFDLISKRQLRGSGIPPTIARSKKLEVLDLSHNLLSGEIVVNFEEGNLLKSLHLGSNKLYGDFPSWLKNCTVLEILDLSHNGFVGEIPEWLGKCSSLKILDLRSNHFTGRIPTQLSLLSNLQVLDLAYNKFFGSIPRSLKTLKAMSKKHDIDKDIESGSGSGYYEEKVVISMKGRQDECFTTILTLINAIDLSCNNLTGEIPKDLTNLHGLKVLNLSYNQLVGPIPKNIGLMTELESLDVSSNSMSGELPLSLANISSLTRLNLSYNNFHGQIP…	509	2042	https://www.nature.com/articles/s41467-019-12607-6	http://cotton.hzau.edu.cn/EN/Download.htm
PlantKGA_88	Piperales	Piperaceae	Piper	nigrum	Piper nigrum	black pepper	胡椒	chromosome	Yes	基因	evmmodelPn41033	evmmodelPn410331288xxPlantKGA_88	evm.model.Pn4.1033	L	partial	Pn19	13501935	13503976	-	Pfam	PF00560	Leucine Rich Repeat	Leucine-rich repeat	245	267	NLQVLDLAYNKFFGSIPRSLKTL	0.17	MRSIPSLTSPEIIMASKINGFGLYLDFAILFTLAFDLSPCAASAPLRSEDDSSSLLLLSCCEGREIKYRDHQNGGGAHVQTKSEGLAELSDITIDQDFKTSLLASDKQITGFKPSIIHQRKKAFVDFDLISKRQLRGSGIPPTIARSKKLEVLDLSHNLLSGEIVVNFEEGNLLKSLHLGSNKLYGDFPSWLKNCTVLEILDLSHNGFVGEIPEWLGKCSSLKILDLRSNHFTGRIPTQLSLLSNLQVLDLAYNKFFGSIPRSLKTLKAMSKKHDIDKDIESGSGSGYYEEKVVISMKGRQDECFTTILTLINAIDLSCNNLTGEIPKDLTNLHGLKVLNLSYNQLVGPIPKNIGLMTELESLDVSSNSMSGELPLSLANISSLTRLNLSYNNFHGQIP…	509	2042	https://www.nature.com/articles/s41467-019-12607-6	http://cotton.hzau.edu.cn/EN/Download.htm
PlantKGA_88	Piperales	Piperaceae	Piper	nigrum	Piper nigrum	black pepper	胡椒	chromosome	Yes	基因	evmmodelPn41033	evmmodelPn410331288xxPlantKGA_88	evm.model.Pn4.1033	L	partial	Pn19	13501935	13503976	-	Pfam	PF13855	Leucine rich repeat	Leucine-rich repeat	174	232	LKSLHLGSNKLYGDFPSWLKNCTVLEILDLSHNGFVGEIPEWLGKCSSLKILDLRSNHF	2.7e-09	MRSIPSLTSPEIIMASKINGFGLYLDFAILFTLAFDLSPCAASAPLRSEDDSSSLLLLSCCEGREIKYRDHQNGGGAHVQTKSEGLAELSDITIDQDFKTSLLASDKQITGFKPSIIHQRKKAFVDFDLISKRQLRGSGIPPTIARSKKLEVLDLSHNLLSGEIVVNFEEGNLLKSLHLGSNKLYGDFPSWLKNCTVLEILDLSHNGFVGEIPEWLGKCSSLKILDLRSNHFTGRIPTQLSLLSNLQVLDLAYNKFFGSIPRSLKTLKAMSKKHDIDKDIESGSGSGYYEEKVVISMKGRQDECFTTILTLINAIDLSCNNLTGEIPKDLTNLHGLKVLNLSYNQLVGPIPKNIGLMTELESLDVSSNSMSGELPLSLANISSLTRLNLSYNNFHGQIP…	509	2042	https://www.nature.com/articles/s41467-019-12607-6	http://cotton.hzau.edu.cn/EN/Download.htm
PlantKGA_88	Piperales	Piperaceae	Piper	nigrum	Piper nigrum	black pepper	胡椒	chromosome	Yes	基因	evmmodelPn41071	evmmodelPn410711288xxPlantKGA_88	evm.model.Pn4.1071	L	partial	Pn19	13793569	13795930	-	Pfam	PF08263	Leucine rich repeat N-terminal domain	Leucine-rich repeat-containing N-terminal, plant-type	32	70	ETDRRALMAFKGEIDDDPYGVLSSWNNSMHFCDWQGVIC	1.2e-10	MEGSFRILLLTGLSACNMSLLGVGGAQHLNNETDRRALMAFKGEIDDDPYGVLSSWNNSMHFCDWQGVICGSRHQRVVGMNLDSFLGLKGRISPHIANLTFLRFISLPNNRLQGEIPHELGRLPRLAVLSLGNNSLEGAIPATLSNFSNLQSILPNSNRLAGQVPPELGLLSRLRGFLIGGNRFTGVFPPFLTNLTSLTNLSLALNSFHGEIPEGIGKLSDLRRFLLEPTTSLLSGVLSPRMGDLFPKLEHVNLPYNYFSGSIPVSLANASNLRSLTFAGNGFVGSIPFDVGKLQDLFWFDFADNLLGAGSGDDLLFLITSLTNCTKLTLLGLGNNTLLGQLPASIANLSRNIFELSLGYNFLHGRIPPGFENILSLERFSLTSNFLTGHIPAEFGQLP…	644	2362	https://www.nature.com/articles/s41467-019-12607-6	http://cotton.hzau.edu.cn/EN/Download.htm
PlantKGA_88	Piperales	Piperaceae	Piper	nigrum	Piper nigrum	black pepper	胡椒	chromosome	Yes	基因	evmmodelPn41292	evmmodelPn412921288xxPlantKGA_88	evm.model.Pn4.1292	L	partial	Pn19	15180204	15180927	+	Pfam	PF08263	Leucine rich repeat N-terminal domain	Leucine-rich repeat-containing N-terminal, plant-type	24	59	SSDREALLALHSAVGRSLKWNASNPSPCTWPGVSCS	3.3e-07	MAMAATLLLLLLSTLSAAASYDLSSDREALLALHSAVGRSLKWNASNPSPCTWPGVSCSPRRRRRTRALGNLTALLTLSLRLNRLSGPLPEDLGRLSALRNLYLQGNSFSGEIPPAMFGLTNLVRLNLASNNFSGRISPGFAKPHEVGDSVLGEQSVSPAPCQTSPTSPSSMSPTTASPAPSRPASEAKRRRLFPATTSAAAPSPPAPANGPPPAPTMAGEAV	223	724	https://www.nature.com/articles/s41467-019-12607-6	http://cotton.hzau.edu.cn/EN/Download.htm
PlantKGA_88	Piperales	Piperaceae	Piper	nigrum	Piper nigrum	black pepper	胡椒	chromosome	Yes	基因	evmmodelPn41301	evmmodelPn413011288xxPlantKGA_88	evm.model.Pn4.1301	L	partial	Pn19	15248568	15249776	+	Pfam	PF13855	Leucine rich repeat	Leucine-rich repeat	118	159	DLFQQLRRLRVLDLSYSRITEVPSIIGSMKHLRYLDLSGTKI	9.5e-07	MAHGFLGGDGEKEIEQRGGEHFDELLSRSFFYEEKSDNKKATNRFKMHDLIHKLAGHIARGEVSVVYTKIANVKVSKARHYLFNGSDNIGSLLRSASESQSLRSLVVLPIGPTNNVSDLFQQLRRLRVLDLSYSRITEVPSIIGSMKHLRYLDLSGTKIAALPMSVTDLCSLQTLKLNQCSLLRALPNRIDKLVSLRYLEFKETEMLRNLPEKIRELSSLRTLSKFCISNDSGLCGIKELEKLNHLQGFLSIQYLDLVTGGEDDVKLAKLQDKEQLTDLQLYWRSEYSWKIENELHNVLENLRPHTNLQKLSISNYRGERFVNWVEDPSFSNLVKIKLHGSSCRQLPALGKLPSLGSLHLKRMNEVQRLKEDLTGGKGGFPRLERLTLWGMHKLTEWMP…	402	1209	https://www.nature.com/articles/s41467-019-12607-6	http://cotton.hzau.edu.cn/EN/Download.htm
PlantKGA_88	Piperales	Piperaceae	Piper	nigrum	Piper nigrum	black pepper	胡椒	chromosome	Yes	基因	evmmodelPn41367	evmmodelPn413671288xxPlantKGA_88	evm.model.Pn4.1367	L	partial	Pn19	15684929	15687612	+	Pfam	PF08263	Leucine rich repeat N-terminal domain	Leucine-rich repeat-containing N-terminal, plant-type	60	92	NGEGNALYALRRSLSDPAGVLQSWDPTLVNPCT	7.3e-06	MNNDHAEIAILMPGLSSSPAPIAANTGLAAGASAPARSLTVGASVVLLLVACVGRPAAGNGEGNALYALRRSLSDPAGVLQSWDPTLVNPCT	92	2684	https://www.nature.com/articles/s41467-019-12607-6	http://cotton.hzau.edu.cn/EN/Download.htm
PlantKGA_88	Piperales	Piperaceae	Piper	nigrum	Piper nigrum	black pepper	胡椒	chromosome	Yes	基因	evmmodelPn41368	evmmodelPn413681288xxPlantKGA_88	evm.model.Pn4.1368	L	partial	Pn19	15694279	15696837	+	Pfam	PF08263	Leucine rich repeat N-terminal domain	Leucine-rich repeat-containing N-terminal, plant-type	33	72	NGEGDALYALRRSLSDPAGVLQSWDPTLVNPCTWFHITCN	6.7e-11	MAAGASARTRSLTVGVSVVLILVACVSRPAAGNGEGDALYALRRSLSDPAGVLQSWDPTLVNPCTWFHITCNADNRVTRVDLGNSNLSGNLVPELGKLKHLQYLELYKNNIQGTIPVELGSLKSLISLDLYNNNITGTIPSSLGKLKSLVFLRLNDNKLTGRIPRGLTGISTLKVVDVSSNNLCGTIPTSGPFEHIPLTNFENNPRLEGPELQGLVAYDTTC	222	2559	https://www.nature.com/articles/s41467-019-12607-6	http://cotton.hzau.edu.cn/EN/Download.htm
PlantKGA_88	Piperales	Piperaceae	Piper	nigrum	Piper nigrum	black pepper	胡椒	chromosome	Yes	基因	evmmodelPn41368	evmmodelPn413681288xxPlantKGA_88	evm.model.Pn4.1368	L	partial	Pn19	15694279	15696837	+	Pfam	PF13855	Leucine rich repeat	Leucine-rich repeat	100	159	HLQYLELYKNNIQGTIPVELGSLKSLISLDLYNNNITGTIPSSLGKLKSLVFLRLNDNKL	5.2e-08	MAAGASARTRSLTVGVSVVLILVACVSRPAAGNGEGDALYALRRSLSDPAGVLQSWDPTLVNPCTWFHITCNADNRVTRVDLGNSNLSGNLVPELGKLKHLQYLELYKNNIQGTIPVELGSLKSLISLDLYNNNITGTIPSSLGKLKSLVFLRLNDNKLTGRIPRGLTGISTLKVVDVSSNNLCGTIPTSGPFEHIPLTNFENNPRLEGPELQGLVAYDTTC	222	2559	https://www.nature.com/articles/s41467-019-12607-6	http://cotton.hzau.edu.cn/EN/Download.htm
PlantKGA_88	Piperales	Piperaceae	Piper	nigrum	Piper nigrum	black pepper	胡椒	chromosome	Yes	基因	evmmodelPn41626	evmmodelPn416261288xxPlantKGA_88	evm.model.Pn4.1626	L	partial	Pn19	17861889	17862972	-	Pfam	PF13855	Leucine rich repeat	Leucine-rich repeat	153	213	RNLEWISLCSNRLAGTISPAFGTLSRFAVLQLANNSLTGGIPAKLRNCSSLVWLDLNINRL	8.1e-08	MCRFPSFSPCSSLVVVDLANNNISGDFPDSVLGRLSSLRKLLLILASTCSPAAGMPWRLLELRAPDNLISGEIPGELALYSHLKTIDLSINKLAGAIPLGARPAGKLGESDVWFNGLTGGILPELGRCGKLRNLILNNKFLTGAIPTELFRYRNLEWISLCSNRLAGTISPAFGTLSRFAVLQLANNSLTGGIPAKLRNCSSLVWLDLNINRLAGQILARLGRQSGEETPTGILSGNTIAFVYNLGCKSVGGLLEFADIMPERLLQGPALKPCDFTRLYSGSAIPPEFGDMAVLQVLDLADTASRADPRHHRQALEPHGRERGFHPFKTRWGPFGRTS	338	1084	https://www.nature.com/articles/s41467-019-12607-6	http://cotton.hzau.edu.cn/EN/Download.htm
PlantKGA_88	Piperales	Piperaceae	Piper	nigrum	Piper nigrum	black pepper	胡椒	chromosome	Yes	基因	evmmodelPn41693	evmmodelPn416931288xxPlantKGA_88	evm.model.Pn4.1693	L	partial	Pn19	18387630	18389708	+	Pfam	PF13855	Leucine rich repeat	Leucine-rich repeat	186	244	LALLHINSNRFCGVVPKSFSRLSLLHELDLSNNRFVGPFPEHVLGLPALKYLDLRYNEL	1.1e-09	MAETSQTPQPPIFFSHNHLLLSIYLKYLFVRILAGSLWGLVQGGLAAITMRASSGHLLLLSVFATLSAVHGLTDAEASSIARRQLLTFHEGGDLSFDFEIGDFAFTFPNSRLKRAYAALQTWKRAIFSDPLNITGNWVGPDVCAYTGVFCAEALDDPTINVVAGLDLNHGDVAGYLPAELGLLTDLALLHINSNRFCGVVPKSFSRLSLLHELDLSNNRFVGPFPEHVLGLPALKYLDLRYNELEGPLPAELFDKDLDALFLNHNRFHSQLPDTLGNSTVSVAVLANNKFSGCVPTTVGNMAHTLNELILLNNDLSGCLPPELGKLSNLTVLDASWNSFTGVMPRSLSELSMVEELDISGNRFTGFVPDAVCRLPELSNFTYSDNYFKGQGLECVPRKG…	692	2079	https://www.nature.com/articles/s41467-019-12607-6	http://cotton.hzau.edu.cn/EN/Download.htm
PlantKGA_88	Piperales	Piperaceae	Piper	nigrum	Piper nigrum	black pepper	胡椒	chromosome	Yes	基因	evmmodelPn41693	evmmodelPn416931288xxPlantKGA_88	evm.model.Pn4.1693	L	partial	Pn19	18387630	18389708	+	Pfam	PF00560	Leucine Rich Repeat	Leucine-rich repeat	328	350	NLTVLDASWNSFTGVMPRSLSEL	1.6	MAETSQTPQPPIFFSHNHLLLSIYLKYLFVRILAGSLWGLVQGGLAAITMRASSGHLLLLSVFATLSAVHGLTDAEASSIARRQLLTFHEGGDLSFDFEIGDFAFTFPNSRLKRAYAALQTWKRAIFSDPLNITGNWVGPDVCAYTGVFCAEALDDPTINVVAGLDLNHGDVAGYLPAELGLLTDLALLHINSNRFCGVVPKSFSRLSLLHELDLSNNRFVGPFPEHVLGLPALKYLDLRYNELEGPLPAELFDKDLDALFLNHNRFHSQLPDTLGNSTVSVAVLANNKFSGCVPTTVGNMAHTLNELILLNNDLSGCLPPELGKLSNLTVLDASWNSFTGVMPRSLSELSMVEELDISGNRFTGFVPDAVCRLPELSNFTYSDNYFKGQGLECVPRKG…	692	2079	https://www.nature.com/articles/s41467-019-12607-6	http://cotton.hzau.edu.cn/EN/Download.htm
PlantKGA_88	Piperales	Piperaceae	Piper	nigrum	Piper nigrum	black pepper	胡椒	chromosome	Yes	基因	evmmodelPn41784	evmmodelPn417841288xxPlantKGA_88	evm.model.Pn4.1784	L	partial	Pn19	19429115	19434209	+	Pfam	PF13516	Leucine Rich repeat	Leucine-rich repeat	155	171	NCRNLVELDLQENDVED	1.9	MVAATTTYSFPDEVLEHVFSFLDSDRDRNAASMVCTAWCRIERGCRRRIFVGNCYAVSPAAAVRLFPEVRSVAIKGKPHFADFNLVPKDWGGNVYPWIAAMAEAYPLLEELRLKRMVVTDESLELLSRSFRNFKVLVMVWCEGFSTNGLAAIASNCRNLVELDLQENDVEDRSGHWMSCFPESCTTLVSLNIACLEGEVSFSALERLVKRCPNLRVLKLNHDIPLDKLATLLRCAPHLVDLGTGAFLTEYRAELFFKLSNAFEGCKNLNALSGFWSVAPSYLPTIFSVCSRLRSLNISYAAVPNPDLIKLVSQCHNLQRLWVLDLIEDTGLQAVADNCKSLEELRVFPSYPFVADQHITLTEQGLVAVSHGCQNLNSVLYFCRQMSNAALIDVAQNQPN…	566	5095	https://www.nature.com/articles/s41467-019-12607-6	http://cotton.hzau.edu.cn/EN/Download.htm
PlantKGA_88	Piperales	Piperaceae	Piper	nigrum	Piper nigrum	black pepper	胡椒	chromosome	Yes	基因	evmmodelPn41784	evmmodelPn417841288xxPlantKGA_88	evm.model.Pn4.1784	L	partial	Pn19	19429115	19434209	+	Pfam	PF13516	Leucine Rich repeat	Leucine-rich repeat	481	500	CKSLRKLEIRDCPFGDKALL	2	MVAATTTYSFPDEVLEHVFSFLDSDRDRNAASMVCTAWCRIERGCRRRIFVGNCYAVSPAAAVRLFPEVRSVAIKGKPHFADFNLVPKDWGGNVYPWIAAMAEAYPLLEELRLKRMVVTDESLELLSRSFRNFKVLVMVWCEGFSTNGLAAIASNCRNLVELDLQENDVEDRSGHWMSCFPESCTTLVSLNIACLEGEVSFSALERLVKRCPNLRVLKLNHDIPLDKLATLLRCAPHLVDLGTGAFLTEYRAELFFKLSNAFEGCKNLNALSGFWSVAPSYLPTIFSVCSRLRSLNISYAAVPNPDLIKLVSQCHNLQRLWVLDLIEDTGLQAVADNCKSLEELRVFPSYPFVADQHITLTEQGLVAVSHGCQNLNSVLYFCRQMSNAALIDVAQNQPN…	566	5095	https://www.nature.com/articles/s41467-019-12607-6	http://cotton.hzau.edu.cn/EN/Download.htm
PlantKGA_88	Piperales	Piperaceae	Piper	nigrum	Piper nigrum	black pepper	胡椒	chromosome	Yes	基因	evmmodelPn42312	evmmodelPn423121288xxPlantKGA_88	evm.model.Pn4.2312	L	partial	Pn24	16666644	16667701	+	Pfam	PF13855	Leucine rich repeat	Leucine-rich repeat	153	209	ELDLSYNNLNGTIPPSLAVLSKLEVLDLSHNSLTGEVPTQIGDMRSLTKLDLSHNNL	8.1e-11	MLVSSPFLERLRLGSNRFSGKIPRLLGEITELSLLNLSGNMLIGALPIELSLCKKCTHIDLHNNQLTGPFPVWLGSLPQLGEVKLSNNQFFGALPVEILNCTDLLWLTIDDNQLNAKQESVLLSKLYELNLANNSFSGEIPAEIGDLDNLQSELDLSYNNLNGTIPPSLAVLSKLEVLDLSHNSLTGEVPTQIGDMRSLTKLDLSHNNLVGRLDKQLSQWPPQTFEANEGLCGSPVQPCVVQSRKSSKWIAISAASSICFVLLVLMLTIIIIRKQKGSEWGSEVGCTYSSSSSQPQRRLIMQAGSRKEFKWEQIMEATNNLWILMDSNHHPSSIS	335	1058	https://www.nature.com/articles/s41467-019-12607-6	http://cotton.hzau.edu.cn/EN/Download.htm
PlantKGA_88	Piperales	Piperaceae	Piper	nigrum	Piper nigrum	black pepper	胡椒	chromosome	Yes	基因	evmmodelPn42581	evmmodelPn425811288xxPlantKGA_88	evm.model.Pn4.2581	L	partial	Pn24	7625162	7625854	-	Pfam	PF08263	Leucine rich repeat N-terminal domain	Leucine-rich repeat-containing N-terminal, plant-type	37	73	NERRALLKFRASLNDSFNHLASWGEDPDCCKWEGVVC	4.8e-13	MWSCNRTALALLITTFLWRSSYGGDGTVSSNISCQGNERRALLKFRASLNDSFNHLASWGEDPDCCKWEGVVCHNQTRYVLQLKLASPHSFYVGFEQTSSNNYWGLSGELNPALLELEQLQVLDLSYNDFKGIQIPTFLGSLKELKYLSLSSANFGGEIPYQLGNLSKLLFSDILRGDHVNAILRSRGLDWLKGMPSLNYLNLDSLDLSKASVSWEHTLNHFTSHRASSA	230	693	https://www.nature.com/articles/s41467-019-12607-6	http://cotton.hzau.edu.cn/EN/Download.htm
PlantKGA_88	Piperales	Piperaceae	Piper	nigrum	Piper nigrum	black pepper	胡椒	chromosome	Yes	基因	evmmodelPn42833	evmmodelPn428331288xxPlantKGA_88	evm.model.Pn4.2833	L	partial	Pn24	5167084	5168451	+	Pfam	PF13855	Leucine rich repeat	Leucine-rich repeat	212	270	ELKVLDLSFNRLGGSIPTTLGYLPNLLKLDLSYNTIAGELPNDLAGLERLEFLDLSYNS	9.1e-12	MVMTILLLFSIFAAAGASPGLDPAEQEAAYLALEAASPGVEWRSLYPDDLCFSGPRAVVCDYFDVDGGAGAGDGTVHVTELYFGPLSSYYDNVICSSDAAFVPPAAWASFRYLRKLFYYRCFVDRPIAVPGHLWNASTSLEELHFVDNPSLVGTVDGKVGDLTFLCRVVISGTGLSGSIPDTIGKLGALEQLVMTRSRFKGHIPTSIGELKELKVLDLSFNRLGGSIPTTLGYLPNLLKLDLSYNTIAGELPNDLAGLERLEFLDLSYNSFLNSGIPLFMAAMVELKQVHLSGNRLGGPIPEIWSKLGNIQGLGLSGLGLVGAIPTSMVVSLTSAAYIGLDNNELQGEIPSELGRLVSLKEMNLENNKLTGELKMPDNFSARVRVAGNDGLCVPAAEVG…	455	1368	https://www.nature.com/articles/s41467-019-12607-6	http://cotton.hzau.edu.cn/EN/Download.htm
PlantKGA_88	Piperales	Piperaceae	Piper	nigrum	Piper nigrum	black pepper	胡椒	chromosome	Yes	基因	evmmodelPn42908	evmmodelPn429081288xxPlantKGA_88	evm.model.Pn4.2908	L	partial	Pn24	4613976	4616806	+	Pfam	PF08263	Leucine rich repeat N-terminal domain	Leucine-rich repeat-containing N-terminal, plant-type	37	74	ENERRALLKFKDGLHDTYHHLASWDDMPDCCNWTGVVC	1.6e-11	MGFKLIVLAAHIVTVSSLFWAGCNGSVRVFSNIRCHENERRALLKFKDGLHDTYHHLASWDDMPDCCNWTGVVCHNQTRYVVQLNLGSPGERSLVDFPNENLPTRYWELGGGIDPALAELKQLQVLDLSNNDFGGIHIPSFLGSMRELKYLNLSFSGFSGEIPHQLGNLSKLQVLDMGMVTLDNFIYYRNLEWLKGMPALEYLNMNAVNLSTTNLYWEHVVNNLTSLTHLHLSSCGLSGAVSPLFPLTSLRSLDLSQNSLGPQFLTWIANMSSLESLDLSYNNFQAGPIPYWVFSLLHLHSLCLSHNQLEGDIPASIGNLTSLSTLDLSKNFLNGSIPQSVGNLTSLAHLDLFHNDLSGAIPETIGRLVALETLNLFYNQFHSSIPESIWNLTSLVDFD…	864	2831	https://www.nature.com/articles/s41467-019-12607-6	http://cotton.hzau.edu.cn/EN/Download.htm
PlantKGA_88	Piperales	Piperaceae	Piper	nigrum	Piper nigrum	black pepper	胡椒	chromosome	Yes	基因	evmmodelPn42908	evmmodelPn429081288xxPlantKGA_88	evm.model.Pn4.2908	L	partial	Pn24	4613976	4616806	+	Pfam	PF13855	Leucine rich repeat	Leucine-rich repeat	298	357	HLHSLCLSHNQLEGDIPASIGNLTSLSTLDLSKNFLNGSIPQSVGNLTSLAHLDLFHNDL	1.6e-08	MGFKLIVLAAHIVTVSSLFWAGCNGSVRVFSNIRCHENERRALLKFKDGLHDTYHHLASWDDMPDCCNWTGVVCHNQTRYVVQLNLGSPGERSLVDFPNENLPTRYWELGGGIDPALAELKQLQVLDLSNNDFGGIHIPSFLGSMRELKYLNLSFSGFSGEIPHQLGNLSKLQVLDMGMVTLDNFIYYRNLEWLKGMPALEYLNMNAVNLSTTNLYWEHVVNNLTSLTHLHLSSCGLSGAVSPLFPLTSLRSLDLSQNSLGPQFLTWIANMSSLESLDLSYNNFQAGPIPYWVFSLLHLHSLCLSHNQLEGDIPASIGNLTSLSTLDLSKNFLNGSIPQSVGNLTSLAHLDLFHNDLSGAIPETIGRLVALETLNLFYNQFHSSIPESIWNLTSLVDFD…	864	2831	https://www.nature.com/articles/s41467-019-12607-6	http://cotton.hzau.edu.cn/EN/Download.htm
PlantKGA_88	Piperales	Piperaceae	Piper	nigrum	Piper nigrum	black pepper	胡椒	chromosome	Yes	基因	evmmodelPn42908	evmmodelPn429081288xxPlantKGA_88	evm.model.Pn4.2908	L	partial	Pn24	4613976	4616806	+	Pfam	PF13855	Leucine rich repeat	Leucine-rich repeat	710	765	IDLSHNHFHGKIPKELLQLSGLVFLNISYNQLTGKIPGNIGGLEMLESLDLSNNQL	4.4e-07	MGFKLIVLAAHIVTVSSLFWAGCNGSVRVFSNIRCHENERRALLKFKDGLHDTYHHLASWDDMPDCCNWTGVVCHNQTRYVVQLNLGSPGERSLVDFPNENLPTRYWELGGGIDPALAELKQLQVLDLSNNDFGGIHIPSFLGSMRELKYLNLSFSGFSGEIPHQLGNLSKLQVLDMGMVTLDNFIYYRNLEWLKGMPALEYLNMNAVNLSTTNLYWEHVVNNLTSLTHLHLSSCGLSGAVSPLFPLTSLRSLDLSQNSLGPQFLTWIANMSSLESLDLSYNNFQAGPIPYWVFSLLHLHSLCLSHNQLEGDIPASIGNLTSLSTLDLSKNFLNGSIPQSVGNLTSLAHLDLFHNDLSGAIPETIGRLVALETLNLFYNQFHSSIPESIWNLTSLVDFD…	864	2831	https://www.nature.com/articles/s41467-019-12607-6	http://cotton.hzau.edu.cn/EN/Download.htm
PlantKGA_88	Piperales	Piperaceae	Piper	nigrum	Piper nigrum	black pepper	胡椒	chromosome	Yes	基因	evmmodelPn42908	evmmodelPn429081288xxPlantKGA_88	evm.model.Pn4.2908	L	partial	Pn24	4613976	4616806	+	Pfam	PF13516	Leucine Rich repeat	Leucine-rich repeat	224	239	LTSLTHLHLSSCGLSG	1.3	MGFKLIVLAAHIVTVSSLFWAGCNGSVRVFSNIRCHENERRALLKFKDGLHDTYHHLASWDDMPDCCNWTGVVCHNQTRYVVQLNLGSPGERSLVDFPNENLPTRYWELGGGIDPALAELKQLQVLDLSNNDFGGIHIPSFLGSMRELKYLNLSFSGFSGEIPHQLGNLSKLQVLDMGMVTLDNFIYYRNLEWLKGMPALEYLNMNAVNLSTTNLYWEHVVNNLTSLTHLHLSSCGLSGAVSPLFPLTSLRSLDLSQNSLGPQFLTWIANMSSLESLDLSYNNFQAGPIPYWVFSLLHLHSLCLSHNQLEGDIPASIGNLTSLSTLDLSKNFLNGSIPQSVGNLTSLAHLDLFHNDLSGAIPETIGRLVALETLNLFYNQFHSSIPESIWNLTSLVDFD…	864	2831	https://www.nature.com/articles/s41467-019-12607-6	http://cotton.hzau.edu.cn/EN/Download.htm
PlantKGA_88	Piperales	Piperaceae	Piper	nigrum	Piper nigrum	black pepper	胡椒	chromosome	Yes	基因	evmmodelPn42908	evmmodelPn429081288xxPlantKGA_88	evm.model.Pn4.2908	L	partial	Pn24	4613976	4616806	+	Pfam	PF00560	Leucine Rich Repeat	Leucine-rich repeat	122	142	QLQVLDLSNNDFGGIHIPSFL	0.14	MGFKLIVLAAHIVTVSSLFWAGCNGSVRVFSNIRCHENERRALLKFKDGLHDTYHHLASWDDMPDCCNWTGVVCHNQTRYVVQLNLGSPGERSLVDFPNENLPTRYWELGGGIDPALAELKQLQVLDLSNNDFGGIHIPSFLGSMRELKYLNLSFSGFSGEIPHQLGNLSKLQVLDMGMVTLDNFIYYRNLEWLKGMPALEYLNMNAVNLSTTNLYWEHVVNNLTSLTHLHLSSCGLSGAVSPLFPLTSLRSLDLSQNSLGPQFLTWIANMSSLESLDLSYNNFQAGPIPYWVFSLLHLHSLCLSHNQLEGDIPASIGNLTSLSTLDLSKNFLNGSIPQSVGNLTSLAHLDLFHNDLSGAIPETIGRLVALETLNLFYNQFHSSIPESIWNLTSLVDFD…	864	2831	https://www.nature.com/articles/s41467-019-12607-6	http://cotton.hzau.edu.cn/EN/Download.htm
PlantKGA_88	Piperales	Piperaceae	Piper	nigrum	Piper nigrum	black pepper	胡椒	chromosome	Yes	基因	evmmodelPn42911	evmmodelPn429111288xxPlantKGA_88	evm.model.Pn4.2911	L	partial	Pn24	4575289	4578225	+	Pfam	PF13855	Leucine rich repeat	Leucine-rich repeat	793	848	IDLSCNHFHGKIPEELLQLSGLVFLNISYNQLTGKIPGNIGELEMLESLDLSNNQL	1.4e-06	MGFKLLVLAAHIVTVSSLFWAGCNGSVRVFSNIRCHENERRALLKFKDGLHDTHHHLASWDDMPDCCNWTGVVCHNQTRYVVQLNLGSPGVRSLEDFPNENLPTWYWELGGGIDPALAELKQLQVLDLSNNDFGGIHIPSFLGSMRELKYLNLSFSGFSGEIPHQLGNLSKLQVLDMGKVTRDNFIYYRNLEWLKGMPALEYLHMNGVNLSTTNLYWEHVVNNLTSLTHLHLSSCGLSGAVSPLFPLTSLRSLDLSHNSLGPQFLTWIANMSSLESLDLSDNNFQAWPFPYCVFSLLHLHSLCLSDNRLEGDIPASIGNLTSLSTLDLSQNFLNGSIPQSVGNLTSLAHLDLFHNDLSGAIPETIGRLVALETLNLFYNQFHSSIPESIWNLTSLVDFD…	978	2937	https://www.nature.com/articles/s41467-019-12607-6	http://cotton.hzau.edu.cn/EN/Download.htm
PlantKGA_88	Piperales	Piperaceae	Piper	nigrum	Piper nigrum	black pepper	胡椒	chromosome	Yes	基因	evmmodelPn42911	evmmodelPn429111288xxPlantKGA_88	evm.model.Pn4.2911	L	partial	Pn24	4575289	4578225	+	Pfam	PF13855	Leucine rich repeat	Leucine-rich repeat	298	357	HLHSLCLSDNRLEGDIPASIGNLTSLSTLDLSQNFLNGSIPQSVGNLTSLAHLDLFHNDL	5.6e-09	MGFKLLVLAAHIVTVSSLFWAGCNGSVRVFSNIRCHENERRALLKFKDGLHDTHHHLASWDDMPDCCNWTGVVCHNQTRYVVQLNLGSPGVRSLEDFPNENLPTWYWELGGGIDPALAELKQLQVLDLSNNDFGGIHIPSFLGSMRELKYLNLSFSGFSGEIPHQLGNLSKLQVLDMGKVTRDNFIYYRNLEWLKGMPALEYLHMNGVNLSTTNLYWEHVVNNLTSLTHLHLSSCGLSGAVSPLFPLTSLRSLDLSHNSLGPQFLTWIANMSSLESLDLSDNNFQAWPFPYCVFSLLHLHSLCLSDNRLEGDIPASIGNLTSLSTLDLSQNFLNGSIPQSVGNLTSLAHLDLFHNDLSGAIPETIGRLVALETLNLFYNQFHSSIPESIWNLTSLVDFD…	978	2937	https://www.nature.com/articles/s41467-019-12607-6	http://cotton.hzau.edu.cn/EN/Download.htm
PlantKGA_88	Piperales	Piperaceae	Piper	nigrum	Piper nigrum	black pepper	胡椒	chromosome	Yes	基因	evmmodelPn42911	evmmodelPn429111288xxPlantKGA_88	evm.model.Pn4.2911	L	partial	Pn24	4575289	4578225	+	Pfam	PF13516	Leucine Rich repeat	Leucine-rich repeat	224	239	LTSLTHLHLSSCGLSG	1.5	MGFKLLVLAAHIVTVSSLFWAGCNGSVRVFSNIRCHENERRALLKFKDGLHDTHHHLASWDDMPDCCNWTGVVCHNQTRYVVQLNLGSPGVRSLEDFPNENLPTWYWELGGGIDPALAELKQLQVLDLSNNDFGGIHIPSFLGSMRELKYLNLSFSGFSGEIPHQLGNLSKLQVLDMGKVTRDNFIYYRNLEWLKGMPALEYLHMNGVNLSTTNLYWEHVVNNLTSLTHLHLSSCGLSGAVSPLFPLTSLRSLDLSHNSLGPQFLTWIANMSSLESLDLSDNNFQAWPFPYCVFSLLHLHSLCLSDNRLEGDIPASIGNLTSLSTLDLSQNFLNGSIPQSVGNLTSLAHLDLFHNDLSGAIPETIGRLVALETLNLFYNQFHSSIPESIWNLTSLVDFD…	978	2937	https://www.nature.com/articles/s41467-019-12607-6	http://cotton.hzau.edu.cn/EN/Download.htm
PlantKGA_88	Piperales	Piperaceae	Piper	nigrum	Piper nigrum	black pepper	胡椒	chromosome	Yes	基因	evmmodelPn42911	evmmodelPn429111288xxPlantKGA_88	evm.model.Pn4.2911	L	partial	Pn24	4575289	4578225	+	Pfam	PF13516	Leucine Rich repeat	Leucine-rich repeat	248	262	TSLRSLDLSHNSLGP	1	MGFKLLVLAAHIVTVSSLFWAGCNGSVRVFSNIRCHENERRALLKFKDGLHDTHHHLASWDDMPDCCNWTGVVCHNQTRYVVQLNLGSPGVRSLEDFPNENLPTWYWELGGGIDPALAELKQLQVLDLSNNDFGGIHIPSFLGSMRELKYLNLSFSGFSGEIPHQLGNLSKLQVLDMGKVTRDNFIYYRNLEWLKGMPALEYLHMNGVNLSTTNLYWEHVVNNLTSLTHLHLSSCGLSGAVSPLFPLTSLRSLDLSHNSLGPQFLTWIANMSSLESLDLSDNNFQAWPFPYCVFSLLHLHSLCLSDNRLEGDIPASIGNLTSLSTLDLSQNFLNGSIPQSVGNLTSLAHLDLFHNDLSGAIPETIGRLVALETLNLFYNQFHSSIPESIWNLTSLVDFD…	978	2937	https://www.nature.com/articles/s41467-019-12607-6	http://cotton.hzau.edu.cn/EN/Download.htm
PlantKGA_88	Piperales	Piperaceae	Piper	nigrum	Piper nigrum	black pepper	胡椒	chromosome	Yes	基因	evmmodelPn42911	evmmodelPn429111288xxPlantKGA_88	evm.model.Pn4.2911	L	partial	Pn24	4575289	4578225	+	Pfam	PF08263	Leucine rich repeat N-terminal domain	Leucine-rich repeat-containing N-terminal, plant-type	37	74	ENERRALLKFKDGLHDTHHHLASWDDMPDCCNWTGVVC	9.1e-13	MGFKLLVLAAHIVTVSSLFWAGCNGSVRVFSNIRCHENERRALLKFKDGLHDTHHHLASWDDMPDCCNWTGVVCHNQTRYVVQLNLGSPGVRSLEDFPNENLPTWYWELGGGIDPALAELKQLQVLDLSNNDFGGIHIPSFLGSMRELKYLNLSFSGFSGEIPHQLGNLSKLQVLDMGKVTRDNFIYYRNLEWLKGMPALEYLHMNGVNLSTTNLYWEHVVNNLTSLTHLHLSSCGLSGAVSPLFPLTSLRSLDLSHNSLGPQFLTWIANMSSLESLDLSDNNFQAWPFPYCVFSLLHLHSLCLSDNRLEGDIPASIGNLTSLSTLDLSQNFLNGSIPQSVGNLTSLAHLDLFHNDLSGAIPETIGRLVALETLNLFYNQFHSSIPESIWNLTSLVDFD…	978	2937	https://www.nature.com/articles/s41467-019-12607-6	http://cotton.hzau.edu.cn/EN/Download.htm
PlantKGA_88	Piperales	Piperaceae	Piper	nigrum	Piper nigrum	black pepper	胡椒	chromosome	Yes	基因	evmmodelPn42911	evmmodelPn429111288xxPlantKGA_88	evm.model.Pn4.2911	L	partial	Pn24	4575289	4578225	+	Pfam	PF00560	Leucine Rich Repeat	Leucine-rich repeat	122	142	QLQVLDLSNNDFGGIHIPSFL	0.16	MGFKLLVLAAHIVTVSSLFWAGCNGSVRVFSNIRCHENERRALLKFKDGLHDTHHHLASWDDMPDCCNWTGVVCHNQTRYVVQLNLGSPGVRSLEDFPNENLPTWYWELGGGIDPALAELKQLQVLDLSNNDFGGIHIPSFLGSMRELKYLNLSFSGFSGEIPHQLGNLSKLQVLDMGKVTRDNFIYYRNLEWLKGMPALEYLHMNGVNLSTTNLYWEHVVNNLTSLTHLHLSSCGLSGAVSPLFPLTSLRSLDLSHNSLGPQFLTWIANMSSLESLDLSDNNFQAWPFPYCVFSLLHLHSLCLSDNRLEGDIPASIGNLTSLSTLDLSQNFLNGSIPQSVGNLTSLAHLDLFHNDLSGAIPETIGRLVALETLNLFYNQFHSSIPESIWNLTSLVDFD…	978	2937	https://www.nature.com/articles/s41467-019-12607-6	http://cotton.hzau.edu.cn/EN/Download.htm
PlantKGA_88	Piperales	Piperaceae	Piper	nigrum	Piper nigrum	black pepper	胡椒	chromosome	Yes	基因	evmmodelPn42913	evmmodelPn429131288xxPlantKGA_88	evm.model.Pn4.2913	L	partial	Pn24	4552154	4553041	+	Pfam	PF00560	Leucine Rich Repeat	Leucine-rich repeat	13	32	QLQVLDLSNNDFGGIQILNF	0.2	MQHSTPALDELKQLQVLDLSNNDFGGIQILNFLGSMTELKYLNLSFSGFSGEIPHQLGNLSKLQVLDTGKAAPNNFMNKRVESRNLEWVKGMPALEYLNMNGAIPETIGRLVALDTLDLISNQFQSSIPESIGNLKSMQGKKL	143	888	https://www.nature.com/articles/s41467-019-12607-6	http://cotton.hzau.edu.cn/EN/Download.htm
PlantKGA_88	Piperales	Piperaceae	Piper	nigrum	Piper nigrum	black pepper	胡椒	chromosome	Yes	基因	evmmodelPn42915	evmmodelPn429151288xxPlantKGA_88	evm.model.Pn4.2915	L	partial	Pn24	4541748	4544621	+	Pfam	PF08263	Leucine rich repeat N-terminal domain	Leucine-rich repeat-containing N-terminal, plant-type	37	74	ENERRALLKFKDGLHDTYHHLASWDDIPDCCNWAGVVC	1.3e-10	MGFKLIVLAAHIFTISFLFWAGCNGNVRVFSNIRCHENERRALLKFKDGLHDTYHHLASWDDIPDCCNWAGVVCHNQTRYVVQLNLGSPGQPSLEDFLPDEKFTTWALSGGVDPALAELKQLQVLDLSNNDFGGIQIPSFLGSMRELKYLNLSFTGFSGEIPHQLGNLSKLQVLDMGMVTRDNFIYYRNLEWLKGMPALEYLNMNGVNLSTTNLYWEHVVNNLTSLTHLHLSSCGLSGAVSPLFPLTSLRSLDLSQNSLGPQFLTWIANMSSLESLDLSYNNFQAGPFPYCVFSLLHLHSLCLSDNRLEGDIPASIGNLTSLSTLDLRENFLNESIPQSVGNLTSLAYLYLSRNNLSGAIPESIWNLTTLVDFHVAWNQIYGQIPESMGNLLNLRSLIL…	957	2874	https://www.nature.com/articles/s41467-019-12607-6	http://cotton.hzau.edu.cn/EN/Download.htm
PlantKGA_88	Piperales	Piperaceae	Piper	nigrum	Piper nigrum	black pepper	胡椒	chromosome	Yes	基因	evmmodelPn42915	evmmodelPn429151288xxPlantKGA_88	evm.model.Pn4.2915	L	partial	Pn24	4541748	4544621	+	Pfam	PF13855	Leucine rich repeat	Leucine-rich repeat	297	356	HLHSLCLSDNRLEGDIPASIGNLTSLSTLDLRENFLNESIPQSVGNLTSLAYLYLSRNNL	5.8e-09	MGFKLIVLAAHIFTISFLFWAGCNGNVRVFSNIRCHENERRALLKFKDGLHDTYHHLASWDDIPDCCNWAGVVCHNQTRYVVQLNLGSPGQPSLEDFLPDEKFTTWALSGGVDPALAELKQLQVLDLSNNDFGGIQIPSFLGSMRELKYLNLSFTGFSGEIPHQLGNLSKLQVLDMGMVTRDNFIYYRNLEWLKGMPALEYLNMNGVNLSTTNLYWEHVVNNLTSLTHLHLSSCGLSGAVSPLFPLTSLRSLDLSQNSLGPQFLTWIANMSSLESLDLSYNNFQAGPFPYCVFSLLHLHSLCLSDNRLEGDIPASIGNLTSLSTLDLRENFLNESIPQSVGNLTSLAYLYLSRNNLSGAIPESIWNLTTLVDFHVAWNQIYGQIPESMGNLLNLRSLIL…	957	2874	https://www.nature.com/articles/s41467-019-12607-6	http://cotton.hzau.edu.cn/EN/Download.htm
PlantKGA_88	Piperales	Piperaceae	Piper	nigrum	Piper nigrum	black pepper	胡椒	chromosome	Yes	基因	evmmodelPn42915	evmmodelPn429151288xxPlantKGA_88	evm.model.Pn4.2915	L	partial	Pn24	4541748	4544621	+	Pfam	PF13855	Leucine rich repeat	Leucine-rich repeat	772	827	IDLSHNHFHGKIPKELLQLSGLVFLNISYNQLTGKIPGNIGGLEMLESLDLSNNQL	4.3e-07	MGFKLIVLAAHIFTISFLFWAGCNGNVRVFSNIRCHENERRALLKFKDGLHDTYHHLASWDDIPDCCNWAGVVCHNQTRYVVQLNLGSPGQPSLEDFLPDEKFTTWALSGGVDPALAELKQLQVLDLSNNDFGGIQIPSFLGSMRELKYLNLSFTGFSGEIPHQLGNLSKLQVLDMGMVTRDNFIYYRNLEWLKGMPALEYLNMNGVNLSTTNLYWEHVVNNLTSLTHLHLSSCGLSGAVSPLFPLTSLRSLDLSQNSLGPQFLTWIANMSSLESLDLSYNNFQAGPFPYCVFSLLHLHSLCLSDNRLEGDIPASIGNLTSLSTLDLRENFLNESIPQSVGNLTSLAYLYLSRNNLSGAIPESIWNLTTLVDFHVAWNQIYGQIPESMGNLLNLRSLIL…	957	2874	https://www.nature.com/articles/s41467-019-12607-6	http://cotton.hzau.edu.cn/EN/Download.htm
PlantKGA_88	Piperales	Piperaceae	Piper	nigrum	Piper nigrum	black pepper	胡椒	chromosome	Yes	基因	evmmodelPn42915	evmmodelPn429151288xxPlantKGA_88	evm.model.Pn4.2915	L	partial	Pn24	4541748	4544621	+	Pfam	PF00560	Leucine Rich Repeat	Leucine-rich repeat	121	141	QLQVLDLSNNDFGGIQIPSFL	0.13	MGFKLIVLAAHIFTISFLFWAGCNGNVRVFSNIRCHENERRALLKFKDGLHDTYHHLASWDDIPDCCNWAGVVCHNQTRYVVQLNLGSPGQPSLEDFLPDEKFTTWALSGGVDPALAELKQLQVLDLSNNDFGGIQIPSFLGSMRELKYLNLSFTGFSGEIPHQLGNLSKLQVLDMGMVTRDNFIYYRNLEWLKGMPALEYLNMNGVNLSTTNLYWEHVVNNLTSLTHLHLSSCGLSGAVSPLFPLTSLRSLDLSQNSLGPQFLTWIANMSSLESLDLSYNNFQAGPFPYCVFSLLHLHSLCLSDNRLEGDIPASIGNLTSLSTLDLRENFLNESIPQSVGNLTSLAYLYLSRNNLSGAIPESIWNLTTLVDFHVAWNQIYGQIPESMGNLLNLRSLIL…	957	2874	https://www.nature.com/articles/s41467-019-12607-6	http://cotton.hzau.edu.cn/EN/Download.htm
PlantKGA_88	Piperales	Piperaceae	Piper	nigrum	Piper nigrum	black pepper	胡椒	chromosome	Yes	基因	evmmodelPn42915	evmmodelPn429151288xxPlantKGA_88	evm.model.Pn4.2915	L	partial	Pn24	4541748	4544621	+	Pfam	PF00560	Leucine Rich Repeat	Leucine-rich repeat	631	653	RLTSLSLSRNMLSGKIPPSIRNC	1.3	MGFKLIVLAAHIFTISFLFWAGCNGNVRVFSNIRCHENERRALLKFKDGLHDTYHHLASWDDIPDCCNWAGVVCHNQTRYVVQLNLGSPGQPSLEDFLPDEKFTTWALSGGVDPALAELKQLQVLDLSNNDFGGIQIPSFLGSMRELKYLNLSFTGFSGEIPHQLGNLSKLQVLDMGMVTRDNFIYYRNLEWLKGMPALEYLNMNGVNLSTTNLYWEHVVNNLTSLTHLHLSSCGLSGAVSPLFPLTSLRSLDLSQNSLGPQFLTWIANMSSLESLDLSYNNFQAGPFPYCVFSLLHLHSLCLSDNRLEGDIPASIGNLTSLSTLDLRENFLNESIPQSVGNLTSLAYLYLSRNNLSGAIPESIWNLTTLVDFHVAWNQIYGQIPESMGNLLNLRSLIL…	957	2874	https://www.nature.com/articles/s41467-019-12607-6	http://cotton.hzau.edu.cn/EN/Download.htm
PlantKGA_88	Piperales	Piperaceae	Piper	nigrum	Piper nigrum	black pepper	胡椒	chromosome	Yes	基因	evmmodelPn4805	evmmodelPn48051288xxPlantKGA_88	evm.model.Pn4.805	L	partial	Pn19	11485447	11486523	+	Pfam	PF12799	Leucine Rich repeats (2 copies)	Leucine rich repeat 4	139	178	ELRHLDLSSNAISGGLPENLSAACPKLQFLNLSFNRLQGS	3e-06	MAASYSLPDTLFYCLAAFAQTPAGRRKVEVDALLAFKAAVDDPLGGLAVWSPATAAAPCDWPGVACTASSVTSLRLPDLGLAGPISPSLALLPNLQQLLLPSNRLNSSLPAARFPSLRLLDLAGNMLAGQLAALPLSAELRHLDLSSNAISGGLPENLSAACPKLQFLNLSFNRLQGSIPPAFGQLQELEYLYLDWNLLRGTIPSAIANCSSLRHLSIQGNGLQGQIPAAIAAVPDLQILSLAHNNLSGPIPATLFYNGSSGTAIRVLQLGFNSFTEAAPLPAESPSSLQVLDLQENRISGGFPAWLTNIPSLRALNLSGNAFSGEMPAGCGPASLLAGVQSGWEHAPWGDSGRDFEM	358	1077	https://www.nature.com/articles/s41467-019-12607-6	http://cotton.hzau.edu.cn/EN/Download.htm
PlantKGA_88	Piperales	Piperaceae	Piper	nigrum	Piper nigrum	black pepper	胡椒	chromosome	Yes	基因	evmmodelPn4805	evmmodelPn48051288xxPlantKGA_88	evm.model.Pn4.805	L	partial	Pn19	11485447	11486523	+	Pfam	PF13855	Leucine rich repeat	Leucine-rich repeat	265	322	IRVLQLGFNSFTEAAPLPAESPSSLQVLDLQENRISGGFPAWLTNIPSLRALNLSGNA	7.4e-10	MAASYSLPDTLFYCLAAFAQTPAGRRKVEVDALLAFKAAVDDPLGGLAVWSPATAAAPCDWPGVACTASSVTSLRLPDLGLAGPISPSLALLPNLQQLLLPSNRLNSSLPAARFPSLRLLDLAGNMLAGQLAALPLSAELRHLDLSSNAISGGLPENLSAACPKLQFLNLSFNRLQGSIPPAFGQLQELEYLYLDWNLLRGTIPSAIANCSSLRHLSIQGNGLQGQIPAAIAAVPDLQILSLAHNNLSGPIPATLFYNGSSGTAIRVLQLGFNSFTEAAPLPAESPSSLQVLDLQENRISGGFPAWLTNIPSLRALNLSGNAFSGEMPAGCGPASLLAGVQSGWEHAPWGDSGRDFEM	358	1077	https://www.nature.com/articles/s41467-019-12607-6	http://cotton.hzau.edu.cn/EN/Download.htm
PlantKGA_88	Piperales	Piperaceae	Piper	nigrum	Piper nigrum	black pepper	胡椒	chromosome	Yes	基因	evmmodelPn4805	evmmodelPn48051288xxPlantKGA_88	evm.model.Pn4.805	L	partial	Pn19	11485447	11486523	+	Pfam	PF13855	Leucine rich repeat	Leucine-rich repeat	188	247	ELEYLYLDWNLLRGTIPSAIANCSSLRHLSIQGNGLQGQIPAAIAAVPDLQILSLAHNNL	1.8e-07	MAASYSLPDTLFYCLAAFAQTPAGRRKVEVDALLAFKAAVDDPLGGLAVWSPATAAAPCDWPGVACTASSVTSLRLPDLGLAGPISPSLALLPNLQQLLLPSNRLNSSLPAARFPSLRLLDLAGNMLAGQLAALPLSAELRHLDLSSNAISGGLPENLSAACPKLQFLNLSFNRLQGSIPPAFGQLQELEYLYLDWNLLRGTIPSAIANCSSLRHLSIQGNGLQGQIPAAIAAVPDLQILSLAHNNLSGPIPATLFYNGSSGTAIRVLQLGFNSFTEAAPLPAESPSSLQVLDLQENRISGGFPAWLTNIPSLRALNLSGNAFSGEMPAGCGPASLLAGVQSGWEHAPWGDSGRDFEM	358	1077	https://www.nature.com/articles/s41467-019-12607-6	http://cotton.hzau.edu.cn/EN/Download.htm
PlantKGA_88	Piperales	Piperaceae	Piper	nigrum	Piper nigrum	black pepper	胡椒	chromosome	Yes	基因	evmmodelPn4805	evmmodelPn48051288xxPlantKGA_88	evm.model.Pn4.805	L	partial	Pn19	11485447	11486523	+	Pfam	PF08263	Leucine rich repeat N-terminal domain	Leucine-rich repeat-containing N-terminal, plant-type	29	66	EVDALLAFKAAVDDPLGGLAVWSPATAAAPCDWPGVAC	8.7e-09	MAASYSLPDTLFYCLAAFAQTPAGRRKVEVDALLAFKAAVDDPLGGLAVWSPATAAAPCDWPGVACTASSVTSLRLPDLGLAGPISPSLALLPNLQQLLLPSNRLNSSLPAARFPSLRLLDLAGNMLAGQLAALPLSAELRHLDLSSNAISGGLPENLSAACPKLQFLNLSFNRLQGSIPPAFGQLQELEYLYLDWNLLRGTIPSAIANCSSLRHLSIQGNGLQGQIPAAIAAVPDLQILSLAHNNLSGPIPATLFYNGSSGTAIRVLQLGFNSFTEAAPLPAESPSSLQVLDLQENRISGGFPAWLTNIPSLRALNLSGNAFSGEMPAGCGPASLLAGVQSGWEHAPWGDSGRDFEM	358	1077	https://www.nature.com/articles/s41467-019-12607-6	http://cotton.hzau.edu.cn/EN/Download.htm
PlantKGA_88	Piperales	Piperaceae	Piper	nigrum	Piper nigrum	black pepper	胡椒	chromosome	Yes	基因	evmmodelPn490	evmmodelPn4901288xxPlantKGA_88	evm.model.Pn4.90	L	partial	Pn19	12715259	12716781	-	Pfam	PF13855	Leucine rich repeat	Leucine-rich repeat	275	333	SLQRLDLSKNYIFSKFPSWVTNITTLRYLDLSSNFLEGELSYDLSELPYLNEIDVRKNH	1.4e-06	MDGSYSKLHHFHLYVCVLALVCLCSLRDPCNGLSNVSCIQSQEEALLKFKNGLIDPSNRLESWQHGTDCCKWEGIQCGEQNGYVTSIDLQNPSVHRNLPFDSYVEGSNSLDNSCLRGQLDPALADLERLQSLDLRFNAFNGTKIPEFLGSMKELLHLDLSYAGFQGYIPYQIGNLSKLEFLDVSSLVRENVHVQMVSIDFRSWNGLHTSYLSSDNLHWLAGLASLKYLTMNQVNLSAITHADLRVFSSLPSLEQLNLSSCSLSVRLIFPPANFSSLQRLDLSKNYIFSKFPSWVTNITTLRYLDLSSNFLEGELSYDLSELPYLNEIDVRKNHNLRVNVSRLFAGAWRNATKIYLGFTDLRGRLPSSIGKISSLQGLNLYCNPDLPCGLEGSIPKEIGK…	471	1523	https://www.nature.com/articles/s41467-019-12607-6	http://cotton.hzau.edu.cn/EN/Download.htm
PlantKGA_88	Piperales	Piperaceae	Piper	nigrum	Piper nigrum	black pepper	胡椒	chromosome	Yes	基因	evmmodelPn490	evmmodelPn4901288xxPlantKGA_88	evm.model.Pn4.90	L	partial	Pn19	12715259	12716781	-	Pfam	PF08263	Leucine rich repeat N-terminal domain	Leucine-rich repeat-containing N-terminal, plant-type	40	77	QSQEEALLKFKNGLIDPSNRLESWQHGTDCCKWEGIQC	1.1e-13	MDGSYSKLHHFHLYVCVLALVCLCSLRDPCNGLSNVSCIQSQEEALLKFKNGLIDPSNRLESWQHGTDCCKWEGIQCGEQNGYVTSIDLQNPSVHRNLPFDSYVEGSNSLDNSCLRGQLDPALADLERLQSLDLRFNAFNGTKIPEFLGSMKELLHLDLSYAGFQGYIPYQIGNLSKLEFLDVSSLVRENVHVQMVSIDFRSWNGLHTSYLSSDNLHWLAGLASLKYLTMNQVNLSAITHADLRVFSSLPSLEQLNLSSCSLSVRLIFPPANFSSLQRLDLSKNYIFSKFPSWVTNITTLRYLDLSSNFLEGELSYDLSELPYLNEIDVRKNHNLRVNVSRLFAGAWRNATKIYLGFTDLRGRLPSSIGKISSLQGLNLYCNPDLPCGLEGSIPKEIGK…	471	1523	https://www.nature.com/articles/s41467-019-12607-6	http://cotton.hzau.edu.cn/EN/Download.htm
PlantKGA_88	Piperales	Piperaceae	Piper	nigrum	Piper nigrum	black pepper	胡椒	chromosome	Yes	基因	evmmodelPn4941	evmmodelPn49411288xxPlantKGA_88	evm.model.Pn4.941	L	partial	Pn19	12499306	12501842	-	Pfam	PF08263	Leucine rich repeat N-terminal domain	Leucine-rich repeat-containing N-terminal, plant-type	30	55	ETDLQALLEFKAQLSDPSEALSSWNN	8.5e-07	MVSHSALIVLILSSMYSIAAGRLINYRSNETDLQALLEFKAQLSDPSEALSSWNNTPFLRMAWGCLWKAPYKSQEARVSRIEAEGAVVTLCSFQGSTSFPIPSSLHSSQIRVVHRSYAPQTSLFNSMSGSNLTNIHDSCHQSCCFLENSGKDCHRAWRNGFNSSKWCTTGRPIYYFSLFPESSFLFFKGCPYVVGFQLLHQAVAKLSMSRIKLLRNKRGLLDKQMRRDVAMLLESGQETIARIRVEHAIREQNITAANEIIVLFCELVVVRNAHHCQTEEGISSLIFGAPRCSDFVTAAIELHPDCVVNHTFKYSAWAADAAAESAQRAIAAAQAAAAFLAEENSKQSIFCGAQSDIKFDDSDGIDSSDCDEEIEMENHANNASNAPPRRPSPLPEARR…	412	2537	https://www.nature.com/articles/s41467-019-12607-6	http://cotton.hzau.edu.cn/EN/Download.htm
PlantKGA_88	Piperales	Piperaceae	Piper	nigrum	Piper nigrum	black pepper	胡椒	chromosome	Yes	基因	evmmodelPn4946	evmmodelPn49461288xxPlantKGA_88	evm.model.Pn4.946	L	partial	Pn19	12521940	12523268	-	Pfam	PF08263	Leucine rich repeat N-terminal domain	Leucine-rich repeat-containing N-terminal, plant-type	108	145	ETDRQALLAFKAQLTDPSNALSSWNNTLHVCEWRGVAC	2e-14	MTGHGFPCSCSTTLPVLSPLCSRLRFQADHAQSRQFHRLPSGDGWNLPKKLFEDERAGHDEAYLTIRKTVLKSKSLRKMASHSALIVLILSSMYSIGAGRLINYRSNETDRQALLAFKAQLTDPSNALSSWNNTLHVCEWRGVACGRRHRRVTELELAELKLRGRLSPFVGNLTFLLYLNLGENYFFGQIPPQIVQLPRLWFLNLSFNSFQGEIPPNMNGSHRLAVVHLANNRLEGEISPRWSLLPILRFLGLSSNNLTGKIPDSFGNFSVNLYHLSIAGNNLHGKIPDTLGRIPRLYFLQLSDNHLSGAIPPPLYNLSSLAYIHMAANGLNGSLPSDIAVHLPNLVSILLGGNQFTGPIPASIANVSQLRFLRFRA	377	1329	https://www.nature.com/articles/s41467-019-12607-6	http://cotton.hzau.edu.cn/EN/Download.htm
PlantKGA_88	Piperales	Piperaceae	Piper	nigrum	Piper nigrum	black pepper	胡椒	chromosome	Yes	基因	evmmodelPn4946	evmmodelPn49461288xxPlantKGA_88	evm.model.Pn4.946	L	partial	Pn19	12521940	12523268	-	Pfam	PF00560	Leucine Rich Repeat	Leucine-rich repeat	248	269	LRFLGLSSNNLTGKIPDSFGNF	0.69	MTGHGFPCSCSTTLPVLSPLCSRLRFQADHAQSRQFHRLPSGDGWNLPKKLFEDERAGHDEAYLTIRKTVLKSKSLRKMASHSALIVLILSSMYSIGAGRLINYRSNETDRQALLAFKAQLTDPSNALSSWNNTLHVCEWRGVACGRRHRRVTELELAELKLRGRLSPFVGNLTFLLYLNLGENYFFGQIPPQIVQLPRLWFLNLSFNSFQGEIPPNMNGSHRLAVVHLANNRLEGEISPRWSLLPILRFLGLSSNNLTGKIPDSFGNFSVNLYHLSIAGNNLHGKIPDTLGRIPRLYFLQLSDNHLSGAIPPPLYNLSSLAYIHMAANGLNGSLPSDIAVHLPNLVSILLGGNQFTGPIPASIANVSQLRFLRFRA	377	1329	https://www.nature.com/articles/s41467-019-12607-6	http://cotton.hzau.edu.cn/EN/Download.htm
PlantKGA_88	Piperales	Piperaceae	Piper	nigrum	Piper nigrum	black pepper	胡椒	chromosome	Yes	基因	evmmodelPn4947	evmmodelPn49471288xxPlantKGA_88	evm.model.Pn4.947	L	partial	Pn19	12523504	12523935	-	Pfam	PF08263	Leucine rich repeat N-terminal domain	Leucine-rich repeat-containing N-terminal, plant-type	17	44	ETDRQALLELKPQITSDPLEALRSWNSS	1.2e-05	MHSAVAGGRHINYRSIETDRQALLELKPQITSDPLEALRSWNSSLHASEWHVVTYGRRHERVTELELANQWRNLLGSYGESSGDLDFITSLDNCTSLTSLHFGDNHLAGFFHSQISNLSKSLKDLTLGGRRCATWRHSENYIS	143	432	https://www.nature.com/articles/s41467-019-12607-6	http://cotton.hzau.edu.cn/EN/Download.htm
PlantKGA_88	Piperales	Piperaceae	Piper	nigrum	Piper nigrum	black pepper	胡椒	chromosome	Yes	基因	evmmodelPn4948	evmmodelPn49481288xxPlantKGA_88	evm.model.Pn4.948	L	partial	Pn19	12534487	12537770	-	Pfam	PF08263	Leucine rich repeat N-terminal domain	Leucine-rich repeat-containing N-terminal, plant-type	16	53	ETDRQALLEFKAQLSDPSKALSSWNNTLHFCEWRGVAC	4.6e-13	MYSIAAGRLFNYRSNETDRQALLEFKAQLSDPSKALSSWNNTLHFCEWRGVACGRRHRRVTKLELAELKLQGPLSPFVVSILSKVKFHLTVSRTVWVWYTPTIDWKGRFHQGACCPSCDSWGVITIPEKFRIPLETSQFIFIIFPLPATIYMERFQTLSAVSRGYISSNCLKTTCPAKFRLPYTIFRPLDTSIWLKMDMEVYPRTQSIFPIWCQFCWVKISLPEPFLHLLLMFLSLGSIFGKTLLLGAFQDTWEDRVSTCSVFRIIHLGAQGKVAMTLTLSRRWLIALVWLNWNLATIILVGTFLCQYRTYQIAHGCRWEEIYMEAFLVEYQRNTLVCSSTLGTTSVGPFPQVASFNICRDWTSMRMNFTAKFLSPLETPPSWFSFKETVYEEPSLKAL…	918	3284	https://www.nature.com/articles/s41467-019-12607-6	http://cotton.hzau.edu.cn/EN/Download.htm
PlantKGA_88	Piperales	Piperaceae	Piper	nigrum	Piper nigrum	black pepper	胡椒	chromosome	Yes	基因	evmmodelPn51230	evmmodelPn512301288xxPlantKGA_88	evm.model.Pn5.1230	L	partial	Pn17	20184191	20184768	-	Pfam	PF13855	Leucine rich repeat	Leucine-rich repeat	10	66	VLDLADNRLSGSVPATFGFLKSLKVLMLYNNSLEGNLPNDLKNCANLTRINISNNRF	3.3e-08	TMGNCQLLLVLDLADNRLSGSVPATFGFLKSLKVLMLYNNSLEGNLPNDLKNCANLTRINISNNRFNGSILPLCSSQSYLSFDITSNLFEGSIPSMLVSSPFLERLRLGSNRFSDKIPRLLGEITELSLLNLSGNMLIGALPIELSLCKKRTHIDLHNNQLTGPFPVWLGSLPQLGEVKLSNNQFFGALPV	191	578	https://www.nature.com/articles/s41467-019-12607-6	http://cotton.hzau.edu.cn/EN/Download.htm
PlantKGA_88	Piperales	Piperaceae	Piper	nigrum	Piper nigrum	black pepper	胡椒	chromosome	Yes	基因	evmmodelPn51448	evmmodelPn514481288xxPlantKGA_88	evm.model.Pn5.1448	L	partial	Pn17	18552944	18554548	-	Pfam	PF13516	Leucine Rich repeat	Leucine-rich repeat	406	428	KQCLTKLNLSENELKDEGIIKVA	0.0024	MKSPIASLSIKLWPPSQSIRSMIFERLVTSLSSPSIFTQKYGALSREEAEQHALKIEELAFSAADEHYEKVPDGDGSSALHLYASESSKLLIGVLKKGSQRKENMVTLASGAKNLPCSSVFDISRERRAFLEAVEAKEILKPLAEEGNNFTKIVFSNRSFGVDAAHVAKSILLSLKDQLTEVDLSDFVAGRSEVEALQVMSIFSLALEGCILRSLNLSNNALGEKGVRAFGPLLKSQSDLEELYLMNDGISEDAAKAVSELLPPTKNMKILHFHNNMTGDEGAFAISELVKRLVALEDFRCSSTRIGSDGGVALAEALETCPKLTKLDLRDNMFGVLAGKAFAKALLKHVFLTEVYLSYLNLEDDGAIAIASALKASAPKLQILELAGNDISVISATAL…	534	1605	https://www.nature.com/articles/s41467-019-12607-6	http://cotton.hzau.edu.cn/EN/Download.htm
PlantKGA_88	Piperales	Piperaceae	Piper	nigrum	Piper nigrum	black pepper	胡椒	chromosome	Yes	基因	evmmodelPn51448	evmmodelPn514481288xxPlantKGA_88	evm.model.Pn5.1448	L	partial	Pn17	18552944	18554548	-	Pfam	PF13516	Leucine Rich repeat	Leucine-rich repeat	212	230	LRSLNLSNNALGEKGVRAF	0.22	MKSPIASLSIKLWPPSQSIRSMIFERLVTSLSSPSIFTQKYGALSREEAEQHALKIEELAFSAADEHYEKVPDGDGSSALHLYASESSKLLIGVLKKGSQRKENMVTLASGAKNLPCSSVFDISRERRAFLEAVEAKEILKPLAEEGNNFTKIVFSNRSFGVDAAHVAKSILLSLKDQLTEVDLSDFVAGRSEVEALQVMSIFSLALEGCILRSLNLSNNALGEKGVRAFGPLLKSQSDLEELYLMNDGISEDAAKAVSELLPPTKNMKILHFHNNMTGDEGAFAISELVKRLVALEDFRCSSTRIGSDGGVALAEALETCPKLTKLDLRDNMFGVLAGKAFAKALLKHVFLTEVYLSYLNLEDDGAIAIASALKASAPKLQILELAGNDISVISATAL…	534	1605	https://www.nature.com/articles/s41467-019-12607-6	http://cotton.hzau.edu.cn/EN/Download.htm
PlantKGA_88	Piperales	Piperaceae	Piper	nigrum	Piper nigrum	black pepper	胡椒	chromosome	Yes	基因	evmmodelPn51448	evmmodelPn514481288xxPlantKGA_88	evm.model.Pn5.1448	L	partial	Pn17	18552944	18554548	-	Pfam	PF13516	Leucine Rich repeat	Leucine-rich repeat	320	335	TCPKLTKLDLRDNMFG	1.9	MKSPIASLSIKLWPPSQSIRSMIFERLVTSLSSPSIFTQKYGALSREEAEQHALKIEELAFSAADEHYEKVPDGDGSSALHLYASESSKLLIGVLKKGSQRKENMVTLASGAKNLPCSSVFDISRERRAFLEAVEAKEILKPLAEEGNNFTKIVFSNRSFGVDAAHVAKSILLSLKDQLTEVDLSDFVAGRSEVEALQVMSIFSLALEGCILRSLNLSNNALGEKGVRAFGPLLKSQSDLEELYLMNDGISEDAAKAVSELLPPTKNMKILHFHNNMTGDEGAFAISELVKRLVALEDFRCSSTRIGSDGGVALAEALETCPKLTKLDLRDNMFGVLAGKAFAKALLKHVFLTEVYLSYLNLEDDGAIAIASALKASAPKLQILELAGNDISVISATAL…	534	1605	https://www.nature.com/articles/s41467-019-12607-6	http://cotton.hzau.edu.cn/EN/Download.htm
PlantKGA_88	Piperales	Piperaceae	Piper	nigrum	Piper nigrum	black pepper	胡椒	chromosome	Yes	基因	evmmodelPn51448	evmmodelPn514481288xxPlantKGA_88	evm.model.Pn5.1448	L	partial	Pn17	18552944	18554548	-	Pfam	PF13516	Leucine Rich repeat	Leucine-rich repeat	379	400	PKLQILELAGNDISVISATALA	1.2	MKSPIASLSIKLWPPSQSIRSMIFERLVTSLSSPSIFTQKYGALSREEAEQHALKIEELAFSAADEHYEKVPDGDGSSALHLYASESSKLLIGVLKKGSQRKENMVTLASGAKNLPCSSVFDISRERRAFLEAVEAKEILKPLAEEGNNFTKIVFSNRSFGVDAAHVAKSILLSLKDQLTEVDLSDFVAGRSEVEALQVMSIFSLALEGCILRSLNLSNNALGEKGVRAFGPLLKSQSDLEELYLMNDGISEDAAKAVSELLPPTKNMKILHFHNNMTGDEGAFAISELVKRLVALEDFRCSSTRIGSDGGVALAEALETCPKLTKLDLRDNMFGVLAGKAFAKALLKHVFLTEVYLSYLNLEDDGAIAIASALKASAPKLQILELAGNDISVISATAL…	534	1605	https://www.nature.com/articles/s41467-019-12607-6	http://cotton.hzau.edu.cn/EN/Download.htm
PlantKGA_88	Piperales	Piperaceae	Piper	nigrum	Piper nigrum	black pepper	胡椒	chromosome	Yes	基因	evmmodelPn51448	evmmodelPn514481288xxPlantKGA_88	evm.model.Pn5.1448	L	partial	Pn17	18552944	18554548	-	Pfam	PF13516	Leucine Rich repeat	Leucine-rich repeat	439	457	MEIDMSSNQLGDVGARKLA	0.016	MKSPIASLSIKLWPPSQSIRSMIFERLVTSLSSPSIFTQKYGALSREEAEQHALKIEELAFSAADEHYEKVPDGDGSSALHLYASESSKLLIGVLKKGSQRKENMVTLASGAKNLPCSSVFDISRERRAFLEAVEAKEILKPLAEEGNNFTKIVFSNRSFGVDAAHVAKSILLSLKDQLTEVDLSDFVAGRSEVEALQVMSIFSLALEGCILRSLNLSNNALGEKGVRAFGPLLKSQSDLEELYLMNDGISEDAAKAVSELLPPTKNMKILHFHNNMTGDEGAFAISELVKRLVALEDFRCSSTRIGSDGGVALAEALETCPKLTKLDLRDNMFGVLAGKAFAKALLKHVFLTEVYLSYLNLEDDGAIAIASALKASAPKLQILELAGNDISVISATAL…	534	1605	https://www.nature.com/articles/s41467-019-12607-6	http://cotton.hzau.edu.cn/EN/Download.htm
PlantKGA_88	Piperales	Piperaceae	Piper	nigrum	Piper nigrum	black pepper	胡椒	chromosome	Yes	基因	evmmodelPn51448	evmmodelPn514481288xxPlantKGA_88	evm.model.Pn5.1448	L	partial	Pn17	18552944	18554548	-	Pfam	PF13516	Leucine Rich repeat	Leucine-rich repeat	351	371	FLTEVYLSYLNLEDDGAIAIA	0.18	MKSPIASLSIKLWPPSQSIRSMIFERLVTSLSSPSIFTQKYGALSREEAEQHALKIEELAFSAADEHYEKVPDGDGSSALHLYASESSKLLIGVLKKGSQRKENMVTLASGAKNLPCSSVFDISRERRAFLEAVEAKEILKPLAEEGNNFTKIVFSNRSFGVDAAHVAKSILLSLKDQLTEVDLSDFVAGRSEVEALQVMSIFSLALEGCILRSLNLSNNALGEKGVRAFGPLLKSQSDLEELYLMNDGISEDAAKAVSELLPPTKNMKILHFHNNMTGDEGAFAISELVKRLVALEDFRCSSTRIGSDGGVALAEALETCPKLTKLDLRDNMFGVLAGKAFAKALLKHVFLTEVYLSYLNLEDDGAIAIASALKASAPKLQILELAGNDISVISATAL…	534	1605	https://www.nature.com/articles/s41467-019-12607-6	http://cotton.hzau.edu.cn/EN/Download.htm
PlantKGA_88	Piperales	Piperaceae	Piper	nigrum	Piper nigrum	black pepper	胡椒	chromosome	Yes	基因	evmmodelPn51493	evmmodelPn514931288xxPlantKGA_88	evm.model.Pn5.1493	L	partial	Pn17	18035952	18037187	-	Pfam	PF08263	Leucine rich repeat N-terminal domain	Leucine-rich repeat-containing N-terminal, plant-type	36	73	DFLVLQSLKKSLRDVPGSTFFSAWDFTSDPCNFPGVFC	1.1e-06	MAKTGSSMSKVLLLLFVFTTILLRASPVYAFLDPLDFLVLQSLKKSLRDVPGSTFFSAWDFTSDPCNFPGVFCKSDKVIELNLGDQRAGSPGLTGRLDPSLANLSSLSVLSIVPGRIFGRIPESIVLCGNLTILAVPGNFLHGEIPASFSNLRLLKTVDLSYNLLSGPIPWSLGEIPSLTNVILAHNRLSGAVPPFFATNLRRLELGHNRLSGDLTFYSLPPSLQYLSFTSNRLTGPVDRVITRLSRLNYLDLSMNRFIGPIPADVFSFPFLSSLILHRNRFTGLVRPTSQVEIQTVDLSYNRLYGRISPLLSMVQNLYLNNNRFMGPVPNGFVDRLLDGRIRVLYLQHNFLTGIDLNPMADIPPSSSLCLQYNCMVPPVQTVCPAKAGWVKTRPPDQC…	411	1236	https://www.nature.com/articles/s41467-019-12607-6	http://cotton.hzau.edu.cn/EN/Download.htm
PlantKGA_88	Piperales	Piperaceae	Piper	nigrum	Piper nigrum	black pepper	胡椒	chromosome	Yes	基因	evmmodelPn51493	evmmodelPn514931288xxPlantKGA_88	evm.model.Pn5.1493	L	partial	Pn17	18035952	18037187	-	Pfam	PF13855	Leucine rich repeat	Leucine-rich repeat	130	189	NLTILAVPGNFLHGEIPASFSNLRLLKTVDLSYNLLSGPIPWSLGEIPSLTNVILAHNRL	1.3e-06	MAKTGSSMSKVLLLLFVFTTILLRASPVYAFLDPLDFLVLQSLKKSLRDVPGSTFFSAWDFTSDPCNFPGVFCKSDKVIELNLGDQRAGSPGLTGRLDPSLANLSSLSVLSIVPGRIFGRIPESIVLCGNLTILAVPGNFLHGEIPASFSNLRLLKTVDLSYNLLSGPIPWSLGEIPSLTNVILAHNRLSGAVPPFFATNLRRLELGHNRLSGDLTFYSLPPSLQYLSFTSNRLTGPVDRVITRLSRLNYLDLSMNRFIGPIPADVFSFPFLSSLILHRNRFTGLVRPTSQVEIQTVDLSYNRLYGRISPLLSMVQNLYLNNNRFMGPVPNGFVDRLLDGRIRVLYLQHNFLTGIDLNPMADIPPSSSLCLQYNCMVPPVQTVCPAKAGWVKTRPPDQC…	411	1236	https://www.nature.com/articles/s41467-019-12607-6	http://cotton.hzau.edu.cn/EN/Download.htm
PlantKGA_88	Piperales	Piperaceae	Piper	nigrum	Piper nigrum	black pepper	胡椒	chromosome	Yes	基因	evmmodelPn51589	evmmodelPn515891288xxPlantKGA_88	evm.model.Pn5.1589	L	partial	Pn17	17307135	17308676	-	Pfam	PF13516	Leucine Rich repeat	Leucine-rich repeat	385	407	KQCLTKLNLSENELKDEGIIKVA	0.0023	MIFERLVTSLSSPSIFTKKYGALSREEAEQHALKIEELAFSAADEHYEKVPDGDGSSALHLYASESSKLLIGVLKKGSQRKENMVTLASGAKNLPCSSVFDISREQRAFLEAVEAKEILKPLAEEGNNFTKIVFSNRSFGVDAAQVAKSILLSLKDQLTEVDLSDFVAGRSEVEALQVMSIFSLALEGCILRSLNLSNNALGEKGVRAFGPLLKSQSDLEELYLMNDGISEDAAKAVSELLPPTKNMKILHFHNNMTGDEGAFAISELVKRLVALEDFRCSSTRIGSDGAVALAEALETCPKLTKLDLRDNMFGVLAGKAFAKALLKHVFLTEVYLSYLNLEDDGAIAIASALKASAPKLQILELAGNDISVISATALAELISAKQCLTKLNLSENELK…	513	1542	https://www.nature.com/articles/s41467-019-12607-6	http://cotton.hzau.edu.cn/EN/Download.htm
PlantKGA_88	Piperales	Piperaceae	Piper	nigrum	Piper nigrum	black pepper	胡椒	chromosome	Yes	基因	evmmodelPn51589	evmmodelPn515891288xxPlantKGA_88	evm.model.Pn5.1589	L	partial	Pn17	17307135	17308676	-	Pfam	PF13516	Leucine Rich repeat	Leucine-rich repeat	299	314	TCPKLTKLDLRDNMFG	1.8	MIFERLVTSLSSPSIFTKKYGALSREEAEQHALKIEELAFSAADEHYEKVPDGDGSSALHLYASESSKLLIGVLKKGSQRKENMVTLASGAKNLPCSSVFDISREQRAFLEAVEAKEILKPLAEEGNNFTKIVFSNRSFGVDAAQVAKSILLSLKDQLTEVDLSDFVAGRSEVEALQVMSIFSLALEGCILRSLNLSNNALGEKGVRAFGPLLKSQSDLEELYLMNDGISEDAAKAVSELLPPTKNMKILHFHNNMTGDEGAFAISELVKRLVALEDFRCSSTRIGSDGAVALAEALETCPKLTKLDLRDNMFGVLAGKAFAKALLKHVFLTEVYLSYLNLEDDGAIAIASALKASAPKLQILELAGNDISVISATALAELISAKQCLTKLNLSENELK…	513	1542	https://www.nature.com/articles/s41467-019-12607-6	http://cotton.hzau.edu.cn/EN/Download.htm
PlantKGA_88	Piperales	Piperaceae	Piper	nigrum	Piper nigrum	black pepper	胡椒	chromosome	Yes	基因	evmmodelPn51589	evmmodelPn515891288xxPlantKGA_88	evm.model.Pn5.1589	L	partial	Pn17	17307135	17308676	-	Pfam	PF13516	Leucine Rich repeat	Leucine-rich repeat	191	209	LRSLNLSNNALGEKGVRAF	0.21	MIFERLVTSLSSPSIFTKKYGALSREEAEQHALKIEELAFSAADEHYEKVPDGDGSSALHLYASESSKLLIGVLKKGSQRKENMVTLASGAKNLPCSSVFDISREQRAFLEAVEAKEILKPLAEEGNNFTKIVFSNRSFGVDAAQVAKSILLSLKDQLTEVDLSDFVAGRSEVEALQVMSIFSLALEGCILRSLNLSNNALGEKGVRAFGPLLKSQSDLEELYLMNDGISEDAAKAVSELLPPTKNMKILHFHNNMTGDEGAFAISELVKRLVALEDFRCSSTRIGSDGAVALAEALETCPKLTKLDLRDNMFGVLAGKAFAKALLKHVFLTEVYLSYLNLEDDGAIAIASALKASAPKLQILELAGNDISVISATALAELISAKQCLTKLNLSENELK…	513	1542	https://www.nature.com/articles/s41467-019-12607-6	http://cotton.hzau.edu.cn/EN/Download.htm
PlantKGA_88	Piperales	Piperaceae	Piper	nigrum	Piper nigrum	black pepper	胡椒	chromosome	Yes	基因	evmmodelPn51589	evmmodelPn515891288xxPlantKGA_88	evm.model.Pn5.1589	L	partial	Pn17	17307135	17308676	-	Pfam	PF13516	Leucine Rich repeat	Leucine-rich repeat	358	379	PKLQILELAGNDISVISATALA	1.2	MIFERLVTSLSSPSIFTKKYGALSREEAEQHALKIEELAFSAADEHYEKVPDGDGSSALHLYASESSKLLIGVLKKGSQRKENMVTLASGAKNLPCSSVFDISREQRAFLEAVEAKEILKPLAEEGNNFTKIVFSNRSFGVDAAQVAKSILLSLKDQLTEVDLSDFVAGRSEVEALQVMSIFSLALEGCILRSLNLSNNALGEKGVRAFGPLLKSQSDLEELYLMNDGISEDAAKAVSELLPPTKNMKILHFHNNMTGDEGAFAISELVKRLVALEDFRCSSTRIGSDGAVALAEALETCPKLTKLDLRDNMFGVLAGKAFAKALLKHVFLTEVYLSYLNLEDDGAIAIASALKASAPKLQILELAGNDISVISATALAELISAKQCLTKLNLSENELK…	513	1542	https://www.nature.com/articles/s41467-019-12607-6	http://cotton.hzau.edu.cn/EN/Download.htm
PlantKGA_88	Piperales	Piperaceae	Piper	nigrum	Piper nigrum	black pepper	胡椒	chromosome	Yes	基因	evmmodelPn51589	evmmodelPn515891288xxPlantKGA_88	evm.model.Pn5.1589	L	partial	Pn17	17307135	17308676	-	Pfam	PF13516	Leucine Rich repeat	Leucine-rich repeat	330	350	FLTEVYLSYLNLEDDGAIAIA	0.17	MIFERLVTSLSSPSIFTKKYGALSREEAEQHALKIEELAFSAADEHYEKVPDGDGSSALHLYASESSKLLIGVLKKGSQRKENMVTLASGAKNLPCSSVFDISREQRAFLEAVEAKEILKPLAEEGNNFTKIVFSNRSFGVDAAQVAKSILLSLKDQLTEVDLSDFVAGRSEVEALQVMSIFSLALEGCILRSLNLSNNALGEKGVRAFGPLLKSQSDLEELYLMNDGISEDAAKAVSELLPPTKNMKILHFHNNMTGDEGAFAISELVKRLVALEDFRCSSTRIGSDGAVALAEALETCPKLTKLDLRDNMFGVLAGKAFAKALLKHVFLTEVYLSYLNLEDDGAIAIASALKASAPKLQILELAGNDISVISATALAELISAKQCLTKLNLSENELK…	513	1542	https://www.nature.com/articles/s41467-019-12607-6	http://cotton.hzau.edu.cn/EN/Download.htm
PlantKGA_88	Piperales	Piperaceae	Piper	nigrum	Piper nigrum	black pepper	胡椒	chromosome	Yes	基因	evmmodelPn51589	evmmodelPn515891288xxPlantKGA_88	evm.model.Pn5.1589	L	partial	Pn17	17307135	17308676	-	Pfam	PF13516	Leucine Rich repeat	Leucine-rich repeat	418	436	MEIDMSSNQLGDVGARKLA	0.016	MIFERLVTSLSSPSIFTKKYGALSREEAEQHALKIEELAFSAADEHYEKVPDGDGSSALHLYASESSKLLIGVLKKGSQRKENMVTLASGAKNLPCSSVFDISREQRAFLEAVEAKEILKPLAEEGNNFTKIVFSNRSFGVDAAQVAKSILLSLKDQLTEVDLSDFVAGRSEVEALQVMSIFSLALEGCILRSLNLSNNALGEKGVRAFGPLLKSQSDLEELYLMNDGISEDAAKAVSELLPPTKNMKILHFHNNMTGDEGAFAISELVKRLVALEDFRCSSTRIGSDGAVALAEALETCPKLTKLDLRDNMFGVLAGKAFAKALLKHVFLTEVYLSYLNLEDDGAIAIASALKASAPKLQILELAGNDISVISATALAELISAKQCLTKLNLSENELK…	513	1542	https://www.nature.com/articles/s41467-019-12607-6	http://cotton.hzau.edu.cn/EN/Download.htm
PlantKGA_88	Piperales	Piperaceae	Piper	nigrum	Piper nigrum	black pepper	胡椒	chromosome	Yes	基因	evmmodelPn51632	evmmodelPn516321288xxPlantKGA_88	evm.model.Pn5.1632	L	partial	Pn17	16834085	16835320	-	Pfam	PF08263	Leucine rich repeat N-terminal domain	Leucine-rich repeat-containing N-terminal, plant-type	36	73	DFLVLQSLKKSLRDVPGSTFFSAWDFTSDPCNFPGVFC	1.1e-06	MAKTGSSMSKILLLLFVFTTILLRASPVYAFLDPLDFLVLQSLKKSLRDVPGSTFFSAWDFTSDPCNFPGVFCKSDKVVELNLGDQRAGSPGLTGRLDPSLANLSSLSVLSIVPGRIFGRIPESIVLCGNLTILAVPGNFLHGEIPASFSNLRLLKTIDLSYNLLSGPIPWSLGEIPSLTNVILAHNRLSGAVPPFFATNLRRLELGHNRLSGDLTFYSLPPSLQYLSFTSNRLTGPVDRVITRLSRLNYLDLSMNRFIGPLPADVFSFPFLSSLILHRNRFTGLVRPTSQVEIQTVDLSYNRLYGRISPLLSMVQNLYLNNNRFMGPVPNGFVDRLLDGRIRVLYLQHNFLTGIDLNPMADIPPSSSLCLQYNCMVPPVQTVCPAKAGWVKTRPPDQC…	411	1236	https://www.nature.com/articles/s41467-019-12607-6	http://cotton.hzau.edu.cn/EN/Download.htm
PlantKGA_88	Piperales	Piperaceae	Piper	nigrum	Piper nigrum	black pepper	胡椒	chromosome	Yes	基因	evmmodelPn51632	evmmodelPn516321288xxPlantKGA_88	evm.model.Pn5.1632	L	partial	Pn17	16834085	16835320	-	Pfam	PF13855	Leucine rich repeat	Leucine-rich repeat	130	189	NLTILAVPGNFLHGEIPASFSNLRLLKTIDLSYNLLSGPIPWSLGEIPSLTNVILAHNRL	2.1e-07	MAKTGSSMSKILLLLFVFTTILLRASPVYAFLDPLDFLVLQSLKKSLRDVPGSTFFSAWDFTSDPCNFPGVFCKSDKVVELNLGDQRAGSPGLTGRLDPSLANLSSLSVLSIVPGRIFGRIPESIVLCGNLTILAVPGNFLHGEIPASFSNLRLLKTIDLSYNLLSGPIPWSLGEIPSLTNVILAHNRLSGAVPPFFATNLRRLELGHNRLSGDLTFYSLPPSLQYLSFTSNRLTGPVDRVITRLSRLNYLDLSMNRFIGPLPADVFSFPFLSSLILHRNRFTGLVRPTSQVEIQTVDLSYNRLYGRISPLLSMVQNLYLNNNRFMGPVPNGFVDRLLDGRIRVLYLQHNFLTGIDLNPMADIPPSSSLCLQYNCMVPPVQTVCPAKAGWVKTRPPDQC…	411	1236	https://www.nature.com/articles/s41467-019-12607-6	http://cotton.hzau.edu.cn/EN/Download.htm
PlantKGA_88	Piperales	Piperaceae	Piper	nigrum	Piper nigrum	black pepper	胡椒	chromosome	Yes	基因	evmmodelPn52233	evmmodelPn522331288xxPlantKGA_88	evm.model.Pn5.2233	L	partial	Pn22	20516851	20517195	-	Pfam	PF00560	Leucine Rich Repeat	Leucine-rich repeat	26	42	SLRHINLRNNELRGSLP	0.42	MRVVSLRLPKARLVGSIPPSLGILSSLRHINLRNNELRGSLPVGLFDAQGLQSLVLYGNNFSGFVPSQIGKLKNLQVLDLSQNSFNSSLPVSLLQCKRLKVLRLSLQWLCWCIT	114	345	https://www.nature.com/articles/s41467-019-12607-6	http://cotton.hzau.edu.cn/EN/Download.htm
PlantKGA_88	Piperales	Piperaceae	Piper	nigrum	Piper nigrum	black pepper	胡椒	chromosome	Yes	基因	evmmodelPn52233	evmmodelPn522331288xxPlantKGA_88	evm.model.Pn5.2233	L	partial	Pn22	20516851	20517195	-	Pfam	PF13855	Leucine rich repeat	Leucine-rich repeat	50	105	GLQSLVLYGNNFSGFVPSQIGKLKNLQVLDLSQNSFNSSLPVSLLQCKRLKVLRLS	1.2e-07	MRVVSLRLPKARLVGSIPPSLGILSSLRHINLRNNELRGSLPVGLFDAQGLQSLVLYGNNFSGFVPSQIGKLKNLQVLDLSQNSFNSSLPVSLLQCKRLKVLRLSLQWLCWCIT	114	345	https://www.nature.com/articles/s41467-019-12607-6	http://cotton.hzau.edu.cn/EN/Download.htm
PlantKGA_88	Piperales	Piperaceae	Piper	nigrum	Piper nigrum	black pepper	胡椒	chromosome	Yes	基因	evmmodelPn52304	evmmodelPn523041288xxPlantKGA_88	evm.model.Pn5.2304	L	partial	Pn22	20012082	20013494	+	Pfam	PF13855	Leucine rich repeat	Leucine-rich repeat	209	268	KLTALYLGINRFTGEVPAVIGNLTSLRSLFLPMCYLRGPLPDAMAGLVSLTKLDLSNNPI	1e-06	MALDLDWNNFTGPIPAGHWSSPALMEFSAANNRLDGSLPSTIGDAIALERLTLSNNRLGGSIPVEIGKLQGLSVLILNSNLLEGSIPPHISNCSGLTTLDLGNNNLRGPIPEGLGELPQLQCLVLSHNQLSGDIPSKMSSFIRQDSIPDTGYIQHQGWEIYFWLTSNEGCVIHDSRSPKRQPLDRFFAAFHTNEFSALFIPPEVGLLTKLTALYLGINRFTGEVPAVIGNLTSLRSLFLPMCYLRGPLPDAMAGLVSLTKLDLSNNPIASPIPKVFGRLRNLTILNFVYAELNGSIPPELGDCTNLHTLTLSFNSLVGSLPPGLARLPVRSFSAEKNLLSGPLPAWVGGWRGIKSLFLGSNQFSGKIPPELGKCSSLAHLSLGNNRFSGRIPSELCDAM…	426	1413	https://www.nature.com/articles/s41467-019-12607-6	http://cotton.hzau.edu.cn/EN/Download.htm
PlantKGA_88	Piperales	Piperaceae	Piper	nigrum	Piper nigrum	black pepper	胡椒	chromosome	Yes	基因	evmmodelPn52304	evmmodelPn523041288xxPlantKGA_88	evm.model.Pn5.2304	L	partial	Pn22	20012082	20013494	+	Pfam	PF13855	Leucine rich repeat	Leucine-rich repeat	71	130	GLSVLILNSNLLEGSIPPHISNCSGLTTLDLGNNNLRGPIPEGLGELPQLQCLVLSHNQL	3.6e-09	MALDLDWNNFTGPIPAGHWSSPALMEFSAANNRLDGSLPSTIGDAIALERLTLSNNRLGGSIPVEIGKLQGLSVLILNSNLLEGSIPPHISNCSGLTTLDLGNNNLRGPIPEGLGELPQLQCLVLSHNQLSGDIPSKMSSFIRQDSIPDTGYIQHQGWEIYFWLTSNEGCVIHDSRSPKRQPLDRFFAAFHTNEFSALFIPPEVGLLTKLTALYLGINRFTGEVPAVIGNLTSLRSLFLPMCYLRGPLPDAMAGLVSLTKLDLSNNPIASPIPKVFGRLRNLTILNFVYAELNGSIPPELGDCTNLHTLTLSFNSLVGSLPPGLARLPVRSFSAEKNLLSGPLPAWVGGWRGIKSLFLGSNQFSGKIPPELGKCSSLAHLSLGNNRFSGRIPSELCDAM…	426	1413	https://www.nature.com/articles/s41467-019-12607-6	http://cotton.hzau.edu.cn/EN/Download.htm
PlantKGA_88	Piperales	Piperaceae	Piper	nigrum	Piper nigrum	black pepper	胡椒	chromosome	Yes	基因	evmmodelPn52305	evmmodelPn523051288xxPlantKGA_88	evm.model.Pn5.2305	L	partial	Pn22	20004920	20012018	+	Pfam	PF13855	Leucine rich repeat	Leucine-rich repeat	354	413	GLSVLILNSNLLEGSIPPHISNCSGLTTLDLGNNNLRGPIPEGLGELPQLQCLVLSHNQL	9.1e-09	MSYFIRQDSIPDTSYIQHHGVFDLSYNTLVGPIPDQRIVGLLTKLTDLYLGINRFTGEVPAVIGNLTSLRSLFLPMCYLRGPLPDAMAGLVSLTKLDLSSNPIASPIPKVFGRLRNLTILNFVYAELNGSIPPELGDCTNLHTLTLSFNSLVGSLPPGLARLPVRSFSAEKNLLSGPLPAWVGGWRGIKSLFLGSNQFSGKIPPELGKCSSLAHLSLGNNRFSGRIPSELCDAMSLEEVDLNTNRLSGSIGRTFVKCRNLTQLILTGNQLVGRIPEYLSELQLMALDLDWNNFTGPIPAGLWSSPALMEFSAANNRLDVTLPSTIGDAIALERLTLSNSRLGGSIPVEIGKLQGLSVLILNSNLLEGSIPPHISNCSGLTTLDLGNNNLRGPIPEGLGE…	715	7099	https://www.nature.com/articles/s41467-019-12607-6	http://cotton.hzau.edu.cn/EN/Download.htm
PlantKGA_88	Piperales	Piperaceae	Piper	nigrum	Piper nigrum	black pepper	胡椒	chromosome	Yes	基因	evmmodelPn52352	evmmodelPn523521288xxPlantKGA_88	evm.model.Pn5.2352	L	partial	Pn22	19588219	19595082	-	Pfam	PF08263	Leucine rich repeat N-terminal domain	Leucine-rich repeat-containing N-terminal, plant-type	456	496	PDSDAEALLLFKESFGNSGALNDWKPGCRPCRGRGQQSWAG	7.3e-06	MAVPAQGKVFVHYNHADSCSGARWTAKECYNYLYERDWKGVAGFYSGLVNGRFSLSNLFGSEPVSQEVPSCLVAEDLRANEELKVVKGQRMGGRWARVTFKIVMSYHGGSFDGWQKQPGLNTVQGSVEKSLGRFVDEMKVKQLVDKSLPVEGCAVVAGRTDKGVTALQQVCSFYTWREDVKTVDIEQAINSIAPGKIRVIYVSQVSRIFHPNFSAKWRRYLYIFPINEEEYLEGNEEIDDTGRTLEQDTACKRMWNSYSKENGTSTSSNDDDEEWEEEHTGNKPRCFSISRVNQLLKQLEGKSLSYRMFARDTKASRSMGPPTECFIFHARAAEGKLPPMYHINDLSIKQSQCGEEDVKVMCVELVANRFLRKMVRVLVATSIREAAAGAGEDALIKLM…	881	6864	https://www.nature.com/articles/s41467-019-12607-6	http://cotton.hzau.edu.cn/EN/Download.htm
PlantKGA_88	Piperales	Piperaceae	Piper	nigrum	Piper nigrum	black pepper	胡椒	chromosome	Yes	基因	evmmodelPn52698	evmmodelPn526981288xxPlantKGA_88	evm.model.Pn5.2698	L	partial	Pn22	9827747	9839788	+	Pfam	PF12799	Leucine Rich repeats (2 copies)	Leucine rich repeat 4	241	280	HLRVLDISSNKITVVEDIENLTKLEDLWLNDNNIGSLEGL	6.3e-08	MDIQEEGCVNGSDSNSSSLDLSSYQLHSLEEIHLPPGLIELDLTANRLSHLDPRICLLSRLEKLSLRQNLFEDAGVGPISSSTKISGLRELILRDNKLTKIPDLIIYQGLIVFDISFNEISSLSGLGKVSSTLRELYASKNEVRRIEELNHFNELQILELGSNRLRVMENLQNLRNLQELWLGRNRIKMVNLCGLKCVRKLSLQSNRLTSMIGFQDCVSLEELYLSHNGIQKMEGLSTLVHLRVLDISSNKITVVEDIENLTKLEDLWLNDNNIGSLEGLDLAIIGSREKLATIYLERNPCANLPHYSAALKQFFPKLEQIDSEVLS	327	12042	https://www.nature.com/articles/s41467-019-12607-6	http://cotton.hzau.edu.cn/EN/Download.htm
PlantKGA_88	Piperales	Piperaceae	Piper	nigrum	Piper nigrum	black pepper	胡椒	chromosome	Yes	基因	evmmodelPn52985	evmmodelPn529851288xxPlantKGA_88	evm.model.Pn5.2985	L	partial	Pn22	16670663	16671022	+	Pfam	PF08263	Leucine rich repeat N-terminal domain	Leucine-rich repeat-containing N-terminal, plant-type	28	70	SDIYSLLEFKTSLEATHSKTILSSWSYSSDPCSASSSWIGVTC	9.3e-11	MNKIVLLIVRWCSTFLCNVCVSSSLVTSDIYSLLEFKTSLEATHSKTILSSWSYSSDPCSASSSWIGVTCHGNRVTRLVLERINLSVPILPLTCLDQLRLLSLHNNCLLSLHHNRLLAG	119	360	https://www.nature.com/articles/s41467-019-12607-6	http://cotton.hzau.edu.cn/EN/Download.htm
PlantKGA_88	Piperales	Piperaceae	Piper	nigrum	Piper nigrum	black pepper	胡椒	chromosome	Yes	基因	evmmodelPn53328	evmmodelPn533281288xxPlantKGA_88	evm.model.Pn5.3328	L	partial	Pn22	573176	578333	+	Pfam	PF13516	Leucine Rich repeat	Leucine-rich repeat	476	495	ITTLELGYNPIGPEGAKALS	0.0018	MVRANGPKSIEETFQSPAARQESMAELDLSFPWNQFSPLSLHPNVGLRRTHVLLSSCGPPRGLFLASPSLGGGGRRRCGRLRRWVPNAAAGQGTGSSRSSQGRRVYRQSQGTAAAAASPALKVKEVVSAVAPAGAFVVVTFVLWKMVEKLLVPKRGKSASSKNKSSAPGMKWSFAAGTNLLSGTSAKVERESREKLNEFAKELRAFRDVDMSGRNFGDEGLFFLAESLAYNQVYSKGLKAFDGILQSNIALKTLNLSGNTINDEGAKVLSDILVGNGGIQKLQLNSCTIGDQGAKAIGEMLKKNSSLRVLELNNNMIEFSGFSGLAGALLENNSIRSLHINGNYGGALGAGALAKGLEGNKSLRELYLHGNSIGNEGVRALMTGLSLHKGKVTLLDIGN…	628	5158	https://www.nature.com/articles/s41467-019-12607-6	http://cotton.hzau.edu.cn/EN/Download.htm
PlantKGA_88	Piperales	Piperaceae	Piper	nigrum	Piper nigrum	black pepper	胡椒	chromosome	Yes	基因	evmmodelPn53328	evmmodelPn533281288xxPlantKGA_88	evm.model.Pn5.3328	L	partial	Pn22	573176	578333	+	Pfam	PF13516	Leucine Rich repeat	Leucine-rich repeat	445	467	NRSITTLDLGGNNIHEKGVTAIA	0.00091	MVRANGPKSIEETFQSPAARQESMAELDLSFPWNQFSPLSLHPNVGLRRTHVLLSSCGPPRGLFLASPSLGGGGRRRCGRLRRWVPNAAAGQGTGSSRSSQGRRVYRQSQGTAAAAASPALKVKEVVSAVAPAGAFVVVTFVLWKMVEKLLVPKRGKSASSKNKSSAPGMKWSFAAGTNLLSGTSAKVERESREKLNEFAKELRAFRDVDMSGRNFGDEGLFFLAESLAYNQVYSKGLKAFDGILQSNIALKTLNLSGNTINDEGAKVLSDILVGNGGIQKLQLNSCTIGDQGAKAIGEMLKKNSSLRVLELNNNMIEFSGFSGLAGALLENNSIRSLHINGNYGGALGAGALAKGLEGNKSLRELYLHGNSIGNEGVRALMTGLSLHKGKVTLLDIGN…	628	5158	https://www.nature.com/articles/s41467-019-12607-6	http://cotton.hzau.edu.cn/EN/Download.htm
PlantKGA_88	Piperales	Piperaceae	Piper	nigrum	Piper nigrum	black pepper	胡椒	chromosome	Yes	基因	evmmodelPn53328	evmmodelPn533281288xxPlantKGA_88	evm.model.Pn5.3328	L	partial	Pn22	573176	578333	+	Pfam	PF13516	Leucine Rich repeat	Leucine-rich repeat	528	551	YNKTISILDLRANGLGDDGLVHLA	0.034	MVRANGPKSIEETFQSPAARQESMAELDLSFPWNQFSPLSLHPNVGLRRTHVLLSSCGPPRGLFLASPSLGGGGRRRCGRLRRWVPNAAAGQGTGSSRSSQGRRVYRQSQGTAAAAASPALKVKEVVSAVAPAGAFVVVTFVLWKMVEKLLVPKRGKSASSKNKSSAPGMKWSFAAGTNLLSGTSAKVERESREKLNEFAKELRAFRDVDMSGRNFGDEGLFFLAESLAYNQVYSKGLKAFDGILQSNIALKTLNLSGNTINDEGAKVLSDILVGNGGIQKLQLNSCTIGDQGAKAIGEMLKKNSSLRVLELNNNMIEFSGFSGLAGALLENNSIRSLHINGNYGGALGAGALAKGLEGNKSLRELYLHGNSIGNEGVRALMTGLSLHKGKVTLLDIGN…	628	5158	https://www.nature.com/articles/s41467-019-12607-6	http://cotton.hzau.edu.cn/EN/Download.htm
PlantKGA_88	Piperales	Piperaceae	Piper	nigrum	Piper nigrum	black pepper	胡椒	chromosome	Yes	基因	evmmodelPn53328	evmmodelPn533281288xxPlantKGA_88	evm.model.Pn5.3328	L	partial	Pn22	573176	578333	+	Pfam	PF13516	Leucine Rich repeat	Leucine-rich repeat	423	439	LNLYMNDIGDEGAERIA	0.4	MVRANGPKSIEETFQSPAARQESMAELDLSFPWNQFSPLSLHPNVGLRRTHVLLSSCGPPRGLFLASPSLGGGGRRRCGRLRRWVPNAAAGQGTGSSRSSQGRRVYRQSQGTAAAAASPALKVKEVVSAVAPAGAFVVVTFVLWKMVEKLLVPKRGKSASSKNKSSAPGMKWSFAAGTNLLSGTSAKVERESREKLNEFAKELRAFRDVDMSGRNFGDEGLFFLAESLAYNQVYSKGLKAFDGILQSNIALKTLNLSGNTINDEGAKVLSDILVGNGGIQKLQLNSCTIGDQGAKAIGEMLKKNSSLRVLELNNNMIEFSGFSGLAGALLENNSIRSLHINGNYGGALGAGALAKGLEGNKSLRELYLHGNSIGNEGVRALMTGLSLHKGKVTLLDIGN…	628	5158	https://www.nature.com/articles/s41467-019-12607-6	http://cotton.hzau.edu.cn/EN/Download.htm
PlantKGA_88	Piperales	Piperaceae	Piper	nigrum	Piper nigrum	black pepper	胡椒	chromosome	Yes	基因	evmmodelPn53328	evmmodelPn533281288xxPlantKGA_88	evm.model.Pn5.3328	L	partial	Pn22	573176	578333	+	Pfam	PF13516	Leucine Rich repeat	Leucine-rich repeat	561	580	LTSVDLAFNEIRDNGAFALA	0.0016	MVRANGPKSIEETFQSPAARQESMAELDLSFPWNQFSPLSLHPNVGLRRTHVLLSSCGPPRGLFLASPSLGGGGRRRCGRLRRWVPNAAAGQGTGSSRSSQGRRVYRQSQGTAAAAASPALKVKEVVSAVAPAGAFVVVTFVLWKMVEKLLVPKRGKSASSKNKSSAPGMKWSFAAGTNLLSGTSAKVERESREKLNEFAKELRAFRDVDMSGRNFGDEGLFFLAESLAYNQVYSKGLKAFDGILQSNIALKTLNLSGNTINDEGAKVLSDILVGNGGIQKLQLNSCTIGDQGAKAIGEMLKKNSSLRVLELNNNMIEFSGFSGLAGALLENNSIRSLHINGNYGGALGAGALAKGLEGNKSLRELYLHGNSIGNEGVRALMTGLSLHKGKVTLLDIGN…	628	5158	https://www.nature.com/articles/s41467-019-12607-6	http://cotton.hzau.edu.cn/EN/Download.htm
PlantKGA_88	Piperales	Piperaceae	Piper	nigrum	Piper nigrum	black pepper	胡椒	chromosome	Yes	基因	evmmodelPn53328	evmmodelPn533281288xxPlantKGA_88	evm.model.Pn5.3328	L	partial	Pn22	573176	578333	+	Pfam	PF13516	Leucine Rich repeat	Leucine-rich repeat	504	523	IETLKLGWCQLGPKGAEQIA	0.14	MVRANGPKSIEETFQSPAARQESMAELDLSFPWNQFSPLSLHPNVGLRRTHVLLSSCGPPRGLFLASPSLGGGGRRRCGRLRRWVPNAAAGQGTGSSRSSQGRRVYRQSQGTAAAAASPALKVKEVVSAVAPAGAFVVVTFVLWKMVEKLLVPKRGKSASSKNKSSAPGMKWSFAAGTNLLSGTSAKVERESREKLNEFAKELRAFRDVDMSGRNFGDEGLFFLAESLAYNQVYSKGLKAFDGILQSNIALKTLNLSGNTINDEGAKVLSDILVGNGGIQKLQLNSCTIGDQGAKAIGEMLKKNSSLRVLELNNNMIEFSGFSGLAGALLENNSIRSLHINGNYGGALGAGALAKGLEGNKSLRELYLHGNSIGNEGVRALMTGLSLHKGKVTLLDIGN…	628	5158	https://www.nature.com/articles/s41467-019-12607-6	http://cotton.hzau.edu.cn/EN/Download.htm
PlantKGA_88	Piperales	Piperaceae	Piper	nigrum	Piper nigrum	black pepper	胡椒	chromosome	Yes	基因	evmmodelPn53328	evmmodelPn533281288xxPlantKGA_88	evm.model.Pn5.3328	L	partial	Pn22	573176	578333	+	Pfam	PF13516	Leucine Rich repeat	Leucine-rich repeat	248	270	NIALKTLNLSGNTINDEGAKVLS	0.00012	MVRANGPKSIEETFQSPAARQESMAELDLSFPWNQFSPLSLHPNVGLRRTHVLLSSCGPPRGLFLASPSLGGGGRRRCGRLRRWVPNAAAGQGTGSSRSSQGRRVYRQSQGTAAAAASPALKVKEVVSAVAPAGAFVVVTFVLWKMVEKLLVPKRGKSASSKNKSSAPGMKWSFAAGTNLLSGTSAKVERESREKLNEFAKELRAFRDVDMSGRNFGDEGLFFLAESLAYNQVYSKGLKAFDGILQSNIALKTLNLSGNTINDEGAKVLSDILVGNGGIQKLQLNSCTIGDQGAKAIGEMLKKNSSLRVLELNNNMIEFSGFSGLAGALLENNSIRSLHINGNYGGALGAGALAKGLEGNKSLRELYLHGNSIGNEGVRALMTGLSLHKGKVTLLDIGN…	628	5158	https://www.nature.com/articles/s41467-019-12607-6	http://cotton.hzau.edu.cn/EN/Download.htm
PlantKGA_88	Piperales	Piperaceae	Piper	nigrum	Piper nigrum	black pepper	胡椒	chromosome	Yes	基因	evmmodelPn53328	evmmodelPn533281288xxPlantKGA_88	evm.model.Pn5.3328	L	partial	Pn22	573176	578333	+	Pfam	PF13516	Leucine Rich repeat	Leucine-rich repeat	392	410	VTLLDIGNNEIGPKGAYHV	1.1	MVRANGPKSIEETFQSPAARQESMAELDLSFPWNQFSPLSLHPNVGLRRTHVLLSSCGPPRGLFLASPSLGGGGRRRCGRLRRWVPNAAAGQGTGSSRSSQGRRVYRQSQGTAAAAASPALKVKEVVSAVAPAGAFVVVTFVLWKMVEKLLVPKRGKSASSKNKSSAPGMKWSFAAGTNLLSGTSAKVERESREKLNEFAKELRAFRDVDMSGRNFGDEGLFFLAESLAYNQVYSKGLKAFDGILQSNIALKTLNLSGNTINDEGAKVLSDILVGNGGIQKLQLNSCTIGDQGAKAIGEMLKKNSSLRVLELNNNMIEFSGFSGLAGALLENNSIRSLHINGNYGGALGAGALAKGLEGNKSLRELYLHGNSIGNEGVRALMTGLSLHKGKVTLLDIGN…	628	5158	https://www.nature.com/articles/s41467-019-12607-6	http://cotton.hzau.edu.cn/EN/Download.htm
PlantKGA_88	Piperales	Piperaceae	Piper	nigrum	Piper nigrum	black pepper	胡椒	chromosome	Yes	基因	evmmodelPn53328	evmmodelPn533281288xxPlantKGA_88	evm.model.Pn5.3328	L	partial	Pn22	573176	578333	+	Pfam	PF13516	Leucine Rich repeat	Leucine-rich repeat	360	382	NKSLRELYLHGNSIGNEGVRALM	0.01	MVRANGPKSIEETFQSPAARQESMAELDLSFPWNQFSPLSLHPNVGLRRTHVLLSSCGPPRGLFLASPSLGGGGRRRCGRLRRWVPNAAAGQGTGSSRSSQGRRVYRQSQGTAAAAASPALKVKEVVSAVAPAGAFVVVTFVLWKMVEKLLVPKRGKSASSKNKSSAPGMKWSFAAGTNLLSGTSAKVERESREKLNEFAKELRAFRDVDMSGRNFGDEGLFFLAESLAYNQVYSKGLKAFDGILQSNIALKTLNLSGNTINDEGAKVLSDILVGNGGIQKLQLNSCTIGDQGAKAIGEMLKKNSSLRVLELNNNMIEFSGFSGLAGALLENNSIRSLHINGNYGGALGAGALAKGLEGNKSLRELYLHGNSIGNEGVRALMTGLSLHKGKVTLLDIGN…	628	5158	https://www.nature.com/articles/s41467-019-12607-6	http://cotton.hzau.edu.cn/EN/Download.htm
PlantKGA_88	Piperales	Piperaceae	Piper	nigrum	Piper nigrum	black pepper	胡椒	chromosome	Yes	基因	evmmodelPn53328	evmmodelPn533281288xxPlantKGA_88	evm.model.Pn5.3328	L	partial	Pn22	573176	578333	+	Pfam	PF13516	Leucine Rich repeat	Leucine-rich repeat	280	297	QKLQLNSCTIGDQGAKAI	0.051	MVRANGPKSIEETFQSPAARQESMAELDLSFPWNQFSPLSLHPNVGLRRTHVLLSSCGPPRGLFLASPSLGGGGRRRCGRLRRWVPNAAAGQGTGSSRSSQGRRVYRQSQGTAAAAASPALKVKEVVSAVAPAGAFVVVTFVLWKMVEKLLVPKRGKSASSKNKSSAPGMKWSFAAGTNLLSGTSAKVERESREKLNEFAKELRAFRDVDMSGRNFGDEGLFFLAESLAYNQVYSKGLKAFDGILQSNIALKTLNLSGNTINDEGAKVLSDILVGNGGIQKLQLNSCTIGDQGAKAIGEMLKKNSSLRVLELNNNMIEFSGFSGLAGALLENNSIRSLHINGNYGGALGAGALAKGLEGNKSLRELYLHGNSIGNEGVRALMTGLSLHKGKVTLLDIGN…	628	5158	https://www.nature.com/articles/s41467-019-12607-6	http://cotton.hzau.edu.cn/EN/Download.htm
PlantKGA_88	Piperales	Piperaceae	Piper	nigrum	Piper nigrum	black pepper	胡椒	chromosome	Yes	基因	evmmodelPn53472	evmmodelPn534721288xxPlantKGA_88	evm.model.Pn5.3472	L	partial	Pn22	2066182	2067796	-	Pfam	PF08263	Leucine rich repeat N-terminal domain	Leucine-rich repeat-containing N-terminal, plant-type	58	102	DEQGEALLAWKTSTLNSSSSSSEAAFASWDASHPNACKWEGITCN	3.9e-08	MGFSPLQSPKHFTDHYPSQLSLMIISSFQCLQAMHNHSIHLLLTFLILFFPIPSLSIDEQGEALLAWKTSTLNSSSSSSEAAFASWDASHPNACKWEGITCNSDHEVVNIVMESLDLGGPLPPTLGRLKSLHTLVLTATNLSGPIPPELGDCSGLVLLDLSDNQLSGEIPPELTRLTNLCSLFLNSNFLEGGIPPNIGNMSSLTYLILYDNKIGGEIPRSIRMLKNLQVFRAGGNQNLRGEVPPEIGNCTELTVLGLAETGITGGLPRSIGALKRLEMIAIYTALLSGPIPEEVGNCTNLQNLYLYQNSIAGAIPTQLGKLKKLQNLLLWQNSLVGSIPDELGSCTELVSIDLSVNLLSGRIPASFGNLSGLQGLQLGVNQLTGAITPELGNCTSLIHL…	517	1615	https://www.nature.com/articles/s41467-019-12607-6	http://cotton.hzau.edu.cn/EN/Download.htm
PlantKGA_88	Piperales	Piperaceae	Piper	nigrum	Piper nigrum	black pepper	胡椒	chromosome	Yes	基因	evmmodelPn53472	evmmodelPn534721288xxPlantKGA_88	evm.model.Pn5.3472	L	partial	Pn22	2066182	2067796	-	Pfam	PF13855	Leucine rich repeat	Leucine-rich repeat	447	506	NLTKLLLLSNELTGILPQAIGRCAGLYRLRLSQNALAGPIPAELGQLKNLNFLDLGSNRL	6.2e-07	MGFSPLQSPKHFTDHYPSQLSLMIISSFQCLQAMHNHSIHLLLTFLILFFPIPSLSIDEQGEALLAWKTSTLNSSSSSSEAAFASWDASHPNACKWEGITCNSDHEVVNIVMESLDLGGPLPPTLGRLKSLHTLVLTATNLSGPIPPELGDCSGLVLLDLSDNQLSGEIPPELTRLTNLCSLFLNSNFLEGGIPPNIGNMSSLTYLILYDNKIGGEIPRSIRMLKNLQVFRAGGNQNLRGEVPPEIGNCTELTVLGLAETGITGGLPRSIGALKRLEMIAIYTALLSGPIPEEVGNCTNLQNLYLYQNSIAGAIPTQLGKLKKLQNLLLWQNSLVGSIPDELGSCTELVSIDLSVNLLSGRIPASFGNLSGLQGLQLGVNQLTGAITPELGNCTSLIHL…	517	1615	https://www.nature.com/articles/s41467-019-12607-6	http://cotton.hzau.edu.cn/EN/Download.htm
PlantKGA_88	Piperales	Piperaceae	Piper	nigrum	Piper nigrum	black pepper	胡椒	chromosome	Yes	基因	evmmodelPn53472	evmmodelPn534721288xxPlantKGA_88	evm.model.Pn5.3472	L	partial	Pn22	2066182	2067796	-	Pfam	PF00560	Leucine Rich Repeat	Leucine-rich repeat	395	417	SLIHLEIDNNDLSGEIPPSFGRL	0.49	MGFSPLQSPKHFTDHYPSQLSLMIISSFQCLQAMHNHSIHLLLTFLILFFPIPSLSIDEQGEALLAWKTSTLNSSSSSSEAAFASWDASHPNACKWEGITCNSDHEVVNIVMESLDLGGPLPPTLGRLKSLHTLVLTATNLSGPIPPELGDCSGLVLLDLSDNQLSGEIPPELTRLTNLCSLFLNSNFLEGGIPPNIGNMSSLTYLILYDNKIGGEIPRSIRMLKNLQVFRAGGNQNLRGEVPPEIGNCTELTVLGLAETGITGGLPRSIGALKRLEMIAIYTALLSGPIPEEVGNCTNLQNLYLYQNSIAGAIPTQLGKLKKLQNLLLWQNSLVGSIPDELGSCTELVSIDLSVNLLSGRIPASFGNLSGLQGLQLGVNQLTGAITPELGNCTSLIHL…	517	1615	https://www.nature.com/articles/s41467-019-12607-6	http://cotton.hzau.edu.cn/EN/Download.htm
PlantKGA_88	Piperales	Piperaceae	Piper	nigrum	Piper nigrum	black pepper	胡椒	chromosome	Yes	基因	evmmodelPn53550	evmmodelPn535501288xxPlantKGA_88	evm.model.Pn5.3550	L	partial	Pn22	2751247	2754207	-	Pfam	PF00560	Leucine Rich Repeat	Leucine-rich repeat	774	793	ILDLSNNFLSGEIPSSLGNL	0.52	MGRIGFECTCMLFLSVVCVILGASNGDVVSMEYSHLLLGIKSKFTDSQQVLGNWSPGTSVCSWDGVVCSEDQTQLLGLNLAGLGLSGSIPNELSLLASIQFLDLSSNYLTGPIPSKLGELGNLSQMLLYSNSLSGAIPPELGRLKKLRVLRIGDNQLAGEITPAIGKLSQLEVLGLASCQFNGSIPAVIGELAKLKALNLQRNGLTGAIPEEIARCVGLQNLSVANNILEGSIPPAMARIRALEILNMANNSFSGVIPAELGALSQLRYLNLLGNALTGTIPMELNKLDKLEMLDLSSNNLSGPINISISSMKSLKSFVLSQNFLTGEVPGDLCVSNSSLKVLFLAQNLLSGPLPLGLLSCSSLEELDLSNNSINGVIPSGIGRLINLRNLIFHNNSFS…	986	2961	https://www.nature.com/articles/s41467-019-12607-6	http://cotton.hzau.edu.cn/EN/Download.htm
PlantKGA_88	Piperales	Piperaceae	Piper	nigrum	Piper nigrum	black pepper	胡椒	chromosome	Yes	基因	evmmodelPn53550	evmmodelPn535501288xxPlantKGA_88	evm.model.Pn5.3550	L	partial	Pn22	2751247	2754207	-	Pfam	PF00560	Leucine Rich Repeat	Leucine-rich repeat	363	383	SLEELDLSNNSINGVIPSGIG	0.79	MGRIGFECTCMLFLSVVCVILGASNGDVVSMEYSHLLLGIKSKFTDSQQVLGNWSPGTSVCSWDGVVCSEDQTQLLGLNLAGLGLSGSIPNELSLLASIQFLDLSSNYLTGPIPSKLGELGNLSQMLLYSNSLSGAIPPELGRLKKLRVLRIGDNQLAGEITPAIGKLSQLEVLGLASCQFNGSIPAVIGELAKLKALNLQRNGLTGAIPEEIARCVGLQNLSVANNILEGSIPPAMARIRALEILNMANNSFSGVIPAELGALSQLRYLNLLGNALTGTIPMELNKLDKLEMLDLSSNNLSGPINISISSMKSLKSFVLSQNFLTGEVPGDLCVSNSSLKVLFLAQNLLSGPLPLGLLSCSSLEELDLSNNSINGVIPSGIGRLINLRNLIFHNNSFS…	986	2961	https://www.nature.com/articles/s41467-019-12607-6	http://cotton.hzau.edu.cn/EN/Download.htm
PlantKGA_88	Piperales	Piperaceae	Piper	nigrum	Piper nigrum	black pepper	胡椒	chromosome	Yes	基因	evmmodelPn53550	evmmodelPn535501288xxPlantKGA_88	evm.model.Pn5.3550	L	partial	Pn22	2751247	2754207	-	Pfam	PF00560	Leucine Rich Repeat	Leucine-rich repeat	723	744	LYVLNLQNNNLSGSIPPTLQNC	1.7	MGRIGFECTCMLFLSVVCVILGASNGDVVSMEYSHLLLGIKSKFTDSQQVLGNWSPGTSVCSWDGVVCSEDQTQLLGLNLAGLGLSGSIPNELSLLASIQFLDLSSNYLTGPIPSKLGELGNLSQMLLYSNSLSGAIPPELGRLKKLRVLRIGDNQLAGEITPAIGKLSQLEVLGLASCQFNGSIPAVIGELAKLKALNLQRNGLTGAIPEEIARCVGLQNLSVANNILEGSIPPAMARIRALEILNMANNSFSGVIPAELGALSQLRYLNLLGNALTGTIPMELNKLDKLEMLDLSSNNLSGPINISISSMKSLKSFVLSQNFLTGEVPGDLCVSNSSLKVLFLAQNLLSGPLPLGLLSCSSLEELDLSNNSINGVIPSGIGRLINLRNLIFHNNSFS…	986	2961	https://www.nature.com/articles/s41467-019-12607-6	http://cotton.hzau.edu.cn/EN/Download.htm
PlantKGA_88	Piperales	Piperaceae	Piper	nigrum	Piper nigrum	black pepper	胡椒	chromosome	Yes	基因	evmmodelPn53550	evmmodelPn535501288xxPlantKGA_88	evm.model.Pn5.3550	L	partial	Pn22	2751247	2754207	-	Pfam	PF13855	Leucine rich repeat	Leucine-rich repeat	578	637	SLIKLDLTDNRFAGAIPSTISASSKLTRLRLGYNSLNGSIPMELGQLVGIELLDLSNNQL	3.9e-07	MGRIGFECTCMLFLSVVCVILGASNGDVVSMEYSHLLLGIKSKFTDSQQVLGNWSPGTSVCSWDGVVCSEDQTQLLGLNLAGLGLSGSIPNELSLLASIQFLDLSSNYLTGPIPSKLGELGNLSQMLLYSNSLSGAIPPELGRLKKLRVLRIGDNQLAGEITPAIGKLSQLEVLGLASCQFNGSIPAVIGELAKLKALNLQRNGLTGAIPEEIARCVGLQNLSVANNILEGSIPPAMARIRALEILNMANNSFSGVIPAELGALSQLRYLNLLGNALTGTIPMELNKLDKLEMLDLSSNNLSGPINISISSMKSLKSFVLSQNFLTGEVPGDLCVSNSSLKVLFLAQNLLSGPLPLGLLSCSSLEELDLSNNSINGVIPSGIGRLINLRNLIFHNNSFS…	986	2961	https://www.nature.com/articles/s41467-019-12607-6	http://cotton.hzau.edu.cn/EN/Download.htm
PlantKGA_88	Piperales	Piperaceae	Piper	nigrum	Piper nigrum	black pepper	胡椒	chromosome	Yes	基因	evmmodelPn53550	evmmodelPn535501288xxPlantKGA_88	evm.model.Pn5.3550	L	partial	Pn22	2751247	2754207	-	Pfam	PF13855	Leucine rich repeat	Leucine-rich repeat	506	566	RKLQKLVLADNKLSGVLPPTLKYLKEIELITLYNNTLEGPIPQSFTLLRNLTSINFSHNKF	2.1e-07	MGRIGFECTCMLFLSVVCVILGASNGDVVSMEYSHLLLGIKSKFTDSQQVLGNWSPGTSVCSWDGVVCSEDQTQLLGLNLAGLGLSGSIPNELSLLASIQFLDLSSNYLTGPIPSKLGELGNLSQMLLYSNSLSGAIPPELGRLKKLRVLRIGDNQLAGEITPAIGKLSQLEVLGLASCQFNGSIPAVIGELAKLKALNLQRNGLTGAIPEEIARCVGLQNLSVANNILEGSIPPAMARIRALEILNMANNSFSGVIPAELGALSQLRYLNLLGNALTGTIPMELNKLDKLEMLDLSSNNLSGPINISISSMKSLKSFVLSQNFLTGEVPGDLCVSNSSLKVLFLAQNLLSGPLPLGLLSCSSLEELDLSNNSINGVIPSGIGRLINLRNLIFHNNSFS…	986	2961	https://www.nature.com/articles/s41467-019-12607-6	http://cotton.hzau.edu.cn/EN/Download.htm
PlantKGA_88	Piperales	Piperaceae	Piper	nigrum	Piper nigrum	black pepper	胡椒	chromosome	Yes	基因	evmmodelPn53550	evmmodelPn535501288xxPlantKGA_88	evm.model.Pn5.3550	L	partial	Pn22	2751247	2754207	-	Pfam	PF13855	Leucine rich repeat	Leucine-rich repeat	242	301	ALEILNMANNSFSGVIPAELGALSQLRYLNLLGNALTGTIPMELNKLDKLEMLDLSSNNL	1.6e-06	MGRIGFECTCMLFLSVVCVILGASNGDVVSMEYSHLLLGIKSKFTDSQQVLGNWSPGTSVCSWDGVVCSEDQTQLLGLNLAGLGLSGSIPNELSLLASIQFLDLSSNYLTGPIPSKLGELGNLSQMLLYSNSLSGAIPPELGRLKKLRVLRIGDNQLAGEITPAIGKLSQLEVLGLASCQFNGSIPAVIGELAKLKALNLQRNGLTGAIPEEIARCVGLQNLSVANNILEGSIPPAMARIRALEILNMANNSFSGVIPAELGALSQLRYLNLLGNALTGTIPMELNKLDKLEMLDLSSNNLSGPINISISSMKSLKSFVLSQNFLTGEVPGDLCVSNSSLKVLFLAQNLLSGPLPLGLLSCSSLEELDLSNNSINGVIPSGIGRLINLRNLIFHNNSFS…	986	2961	https://www.nature.com/articles/s41467-019-12607-6	http://cotton.hzau.edu.cn/EN/Download.htm
PlantKGA_88	Piperales	Piperaceae	Piper	nigrum	Piper nigrum	black pepper	胡椒	chromosome	Yes	基因	evmmodelPn53550	evmmodelPn535501288xxPlantKGA_88	evm.model.Pn5.3550	L	partial	Pn22	2751247	2754207	-	Pfam	PF08263	Leucine rich repeat N-terminal domain	Leucine-rich repeat-containing N-terminal, plant-type	36	69	LLLGIKSKFTDSQQVLGNWSPGTSVCSWDGVVCS	3.3e-09	MGRIGFECTCMLFLSVVCVILGASNGDVVSMEYSHLLLGIKSKFTDSQQVLGNWSPGTSVCSWDGVVCSEDQTQLLGLNLAGLGLSGSIPNELSLLASIQFLDLSSNYLTGPIPSKLGELGNLSQMLLYSNSLSGAIPPELGRLKKLRVLRIGDNQLAGEITPAIGKLSQLEVLGLASCQFNGSIPAVIGELAKLKALNLQRNGLTGAIPEEIARCVGLQNLSVANNILEGSIPPAMARIRALEILNMANNSFSGVIPAELGALSQLRYLNLLGNALTGTIPMELNKLDKLEMLDLSSNNLSGPINISISSMKSLKSFVLSQNFLTGEVPGDLCVSNSSLKVLFLAQNLLSGPLPLGLLSCSSLEELDLSNNSINGVIPSGIGRLINLRNLIFHNNSFS…	986	2961	https://www.nature.com/articles/s41467-019-12607-6	http://cotton.hzau.edu.cn/EN/Download.htm
PlantKGA_88	Piperales	Piperaceae	Piper	nigrum	Piper nigrum	black pepper	胡椒	chromosome	Yes	基因	evmmodelPn5852	evmmodelPn58521288xxPlantKGA_88	evm.model.Pn5.852	L	partial	Pn17	1469188	1471677	+	Pfam	PF13855	Leucine rich repeat	Leucine-rich repeat	437	492	GLKSVNLSGNFIAYITPGSLPKGLHTLNLSKNKIATIEGLRDLTRLRILNLSYNRI	1.3e-08	MAKFNCFSALIGRKKKTQGEVGEAFDETKGQRTLQVKLERGNVGGDSKEGDFKVTSFHFPVPFEVVGGATCNVKVLRGESSPSLDALDAAYEGEDEHDEQVASMRRDFSDLDLQAKVEEHLLSSEASNLSDVIATSVKANDGDGGGGGGGEMELVQSGHVSDPGIANAQDWGSPKLVRSCSNLETRAVLEKVGHQLPQSNSYDDMGNIGGGEFTVPAIHGSPLSGMTTMSADKVVLKKGSSSHMLPSRSRKLWWQLFLMSHRNLHRPAVTSSIHISMKNISKQPDGYCSDTMEGSQANAGMKKESSFGSHRIESPWLISDELSSKNLHDVHRNQWMAFSSESSGLARVDEWVNMLGIQSVNPPDDADCNETGETETSIVYPPSPQKDTQAIRHSNGILS…	658	2490	https://www.nature.com/articles/s41467-019-12607-6	http://cotton.hzau.edu.cn/EN/Download.htm
PlantKGA_88	Piperales	Piperaceae	Piper	nigrum	Piper nigrum	black pepper	胡椒	chromosome	Yes	基因	evmmodelPn61146	evmmodelPn611461288xxPlantKGA_88	evm.model.Pn6.1146	L	partial	Pn2	17603211	17608272	-	Pfam	PF13855	Leucine rich repeat	Leucine-rich repeat	443	502	HLQSINLSGNSIHGVIPSSLGTVAGLQTLDLSFNLLNGTIPESLGQLKSLRRLNLNGNSL	2.2e-10	MSLYLLLLLLAGLFGPSHQRKDPVAIRITCGSRVNAHTPPAGTLWYKDYAYTGGRPGNASRTSFIAPSLSTLRYFPLSDGPNNCYIVKNVPNGHYAVRTFFALVSDLGLDNEPLFDVSIEGTQIYSLKSDWSLDDEQSFVEALVFVKDKSVSVCFHSTGHGDPSILSIEILQVDDNGYNFGPQWSKEIILRTVKRVNSGDTKPAYGEDYGANRWGGDRFWLPIHTLKKGSDRLITFKETIHRVSVPPNFYPERLYKYAIVSTDADPDLSFSMDVDPKKSYSIWLHFAEIEAGITSKGQRMFDIQINGDTAFKDVDIVNLAGGPHTALVLNKTVAVDGRSLTITMHPTKGKHALVNAIEIFEVIAQESSTSGGEVKTLQILKASLGLPLRLGWNGDPCVP…	628	5062	https://www.nature.com/articles/s41467-019-12607-6	http://cotton.hzau.edu.cn/EN/Download.htm
PlantKGA_88	Piperales	Piperaceae	Piper	nigrum	Piper nigrum	black pepper	胡椒	chromosome	Yes	基因	evmmodelPn61153	evmmodelPn611531288xxPlantKGA_88	evm.model.Pn6.1153	L	partial	Pn2	17555626	17560694	-	Pfam	PF13855	Leucine rich repeat	Leucine-rich repeat	443	502	HLQSINLSGNSIHGVIPSSLGTVAGLQTLDLSFNLLNGTIPESLGQLKSLRRLNLNGNSL	9e-11	MSLYLLLLLLAGLFGPSHQRKDPVTIRITCGSRVNAHTPPAGTLWYKDYAYTGGRPGNASRTSFIAPSLSTLRYFPLSDGPNNCYIVKNVPNGHYAVRTFFALVSDLGLDNEPLFDVSIEGTQIYSLKSDWSLDDEQSFVEALVFVKDKSVSVCFHSTGHGDPSILSIEILQVDDNGYNFGPQWSKEIILRTVKRVNSGDTKPAYGEDYGANRWGGDRFWLPIHTLKKGSDRLITFKETIHRVSVPPNFYPERLYKYAIVSTDADPDLSFSMDVDPKKSYSIWLHFAEIEAGITSKGQRMFDIQINGDTAFKDVDIVNLAGGPHTALVLNKTVAVDGRSLTITMHPTKGKHALVNAIEIFEVIAQESSTSGGEVKTLQILKASLGLPLRLGWNGDPCVP…	628	5069	https://www.nature.com/articles/s41467-019-12607-6	http://cotton.hzau.edu.cn/EN/Download.htm
PlantKGA_88	Piperales	Piperaceae	Piper	nigrum	Piper nigrum	black pepper	胡椒	chromosome	Yes	基因	evmmodelPn61361	evmmodelPn613611288xxPlantKGA_88	evm.model.Pn6.1361	L	partial	Pn2	16069633	16070182	-	Pfam	PF08263	Leucine rich repeat N-terminal domain	Leucine-rich repeat-containing N-terminal, plant-type	27	65	SDGILLLSFKYAVLTDPVGALGGWNYDDATPCSWNGVAC	2e-10	MTSPPTLHSLPLLFLYLFFHRAACLTSDGILLLSFKYAVLTDPVGALGGWNYDDATPCSWNGVACAGADGEHLRRLDLSGNFLNGSLPLQLFNASELALLNLADNELSGELPDLFGRLPGLQTVNLSGQRLRRHCAAEPRRRAQPHRDFFKQ	152	550	https://www.nature.com/articles/s41467-019-12607-6	http://cotton.hzau.edu.cn/EN/Download.htm
PlantKGA_88	Piperales	Piperaceae	Piper	nigrum	Piper nigrum	black pepper	胡椒	chromosome	Yes	基因	evmmodelPn61361	evmmodelPn613611288xxPlantKGA_88	evm.model.Pn6.1361	L	partial	Pn2	16069633	16070182	-	Pfam	PF00560	Leucine Rich Repeat	Leucine-rich repeat	72	88	HLRRLDLSGNFLNGSLP	0.17	MTSPPTLHSLPLLFLYLFFHRAACLTSDGILLLSFKYAVLTDPVGALGGWNYDDATPCSWNGVACAGADGEHLRRLDLSGNFLNGSLPLQLFNASELALLNLADNELSGELPDLFGRLPGLQTVNLSGQRLRRHCAAEPRRRAQPHRDFFKQ	152	550	https://www.nature.com/articles/s41467-019-12607-6	http://cotton.hzau.edu.cn/EN/Download.htm
PlantKGA_88	Piperales	Piperaceae	Piper	nigrum	Piper nigrum	black pepper	胡椒	chromosome	Yes	基因	evmmodelPn61489	evmmodelPn614891288xxPlantKGA_88	evm.model.Pn6.1489	L	partial	Pn2	15040837	15045923	-	Pfam	PF08263	Leucine rich repeat N-terminal domain	Leucine-rich repeat-containing N-terminal, plant-type	34	72	REQAALLKFKNGIIVDDGNILQSWRDGEDCCRWRGITCN	2.9e-12	MHSHTWSCILVSFVIVTLFHGVTGRIEAVKCHPREQAALLKFKNGIIVDDGNILQSWRDGEDCCRWRGITCNNITDGEIPRTLGNLSKLEVLDLNYQYDIHANSLGWLSNLRLLKYLNLNGVHLPKVGHEWMEVLSSFSSLEELHLEDCNLAIPGQSSPPWHQQSRGTSKEPRGRRSSSSWGKKLTPLVVFAAPSTDMNGSIAAMFSKLPKLEELYLSENLISQNVSDLIFASDWSNIRVIELYENRLVGKLPASIGNFSVSLQILDLSSNLITGVIPTEIGHLQNLRELDLGNYLPGLELRWNFYNLGESYLSSMKIEGALPHSLCQLKKLVELSLGYNTLNGAIPDCLGSLTSLETLSLEHNQLEGNLPTTLGQLSHLRTLLLGGNTLEGPVLDSHL…	859	5087	https://www.nature.com/articles/s41467-019-12607-6	http://cotton.hzau.edu.cn/EN/Download.htm
PlantKGA_88	Piperales	Piperaceae	Piper	nigrum	Piper nigrum	black pepper	胡椒	chromosome	Yes	基因	evmmodelPn61489	evmmodelPn614891288xxPlantKGA_88	evm.model.Pn6.1489	L	partial	Pn2	15040837	15045923	-	Pfam	PF13855	Leucine rich repeat	Leucine-rich repeat	331	390	KLVELSLGYNTLNGAIPDCLGSLTSLETLSLEHNQLEGNLPTTLGQLSHLRTLLLGGNTL	5.2e-07	MHSHTWSCILVSFVIVTLFHGVTGRIEAVKCHPREQAALLKFKNGIIVDDGNILQSWRDGEDCCRWRGITCNNITDGEIPRTLGNLSKLEVLDLNYQYDIHANSLGWLSNLRLLKYLNLNGVHLPKVGHEWMEVLSSFSSLEELHLEDCNLAIPGQSSPPWHQQSRGTSKEPRGRRSSSSWGKKLTPLVVFAAPSTDMNGSIAAMFSKLPKLEELYLSENLISQNVSDLIFASDWSNIRVIELYENRLVGKLPASIGNFSVSLQILDLSSNLITGVIPTEIGHLQNLRELDLGNYLPGLELRWNFYNLGESYLSSMKIEGALPHSLCQLKKLVELSLGYNTLNGAIPDCLGSLTSLETLSLEHNQLEGNLPTTLGQLSHLRTLLLGGNTLEGPVLDSHL…	859	5087	https://www.nature.com/articles/s41467-019-12607-6	http://cotton.hzau.edu.cn/EN/Download.htm
[truncated: 97,006 more rows]
